# Supplementary material for: Chemoproteomics validates selective targeting of Plasmodium M1 alanyl aminopeptidase as an antimalarial strategy
Source: eLife. 2024 Jul 8;13:RP92990. doi: 10.7554/eLife.92990 (PMC11230628; doi:10.7554/eLife.92990)
Supplement: Figure 3—source data 1. [file elife-92990-fig3-data1.xlsx]

## Sheet: Data S1 TSP Exp 1
Data S1. Related to Fig. 3. Experiment 1 TSP data
PG.ProteinAccessions	PG.FASTAHeader	Peptide count MIPS2673 1 µM - Rep #1	Peptide count MIPS2673 1 µM - Rep #2	Peptide count MIPS2673 1 µM - Rep #3	Peptide count MIPS2673 1 µM - Rep #4	Peptide count MIPS2673 4 µM - Rep #1	Peptide count MIPS2673 4 µM - Rep #2	Peptide count MIPS2673 4 µM - Rep #3	Peptide count MIPS2673 4 µM - Rep #4	Peptide count DMSO - Rep #1	Peptide count DMSO - Rep #2	Peptide count DMSO - Rep #3	Peptide count DMSO - Rep #4	Peptide count	Protein intensity MIPS2673 1 µM - Rep #1	Protein intensity MIPS2673 1 µM - Rep #2	Protein intensity MIPS2673 1 µM - Rep #3	Protein intensity MIPS2673 1 µM - Rep #4	Protein intensity MIPS2673 4 µM - Rep #1	Protein intensity MIPS2673 4 µM - Rep #2	Protein intensity MIPS2673 4 µM - Rep #3	Protein intensity MIPS2673 4 µM - Rep #4	Protein intensity DMSO - Rep #1	Protein intensity DMSO - Rep #2	Protein intensity DMSO - Rep #3	Protein intensity DMSO - Rep #4		Average intensity 1 µM	Average intensity 4 µM	Average intensity DMSO	Sum of average intensity		Fold change - MIPS2673 1 µM versus DMSO	Fold change - MIPS2673 4 µM versus DMSO		P-value - MIPS2673 1 µM versus DMSO	P-value - MIPS2673 4 µM versus DMSO
Q14964	>sp|Q14964|RB39A_HUMAN Ras-related protein Rab-39A OS=Homo sapiens GN=RAB39A PE=1 SV=2	4	4	4	4	4	4	4	4	4	4	4	4	48	1.77803e+06	1.47138e+06	2.65914e+06	2.28045e+06	3.79919e+06	2.79858e+06	3.17291e+06	4.12041e+06	710416	955560	863091	809003		2.04725e+06	3.47277e+06	834517	6.35454e+06		2.45321	4.16141		0.0173087	0.00254843
transcript=PF3D7_1311800.1	>PF3D7_1311800.1-p1 | transcript=PF3D7_1311800.1 | gene=PF3D7_1311800 | organism=Plasmodium_falciparum_3D7 | gene_product=M1-family alanyl aminopeptidase | transcript_product=M1-family alanyl aminopeptidase | location=Pf3D7_13_v3:501790-505047(+) | protein_length=1085 | sequence_SO=chromosome | SO=protein_coding | is_pseudo=false	115	115	115	115	115	115	115	115	115	115	115	115	1380	16050843	15865554	15943987	14901001	34321000	25657392	30700962	28790956	8.05482e+06	9227725	9036165	7846449		1.56903e+07	2.98676e+07	8.54129e+06	5.40992e+07		1.837	3.49685		5.78073e-06	0.000994273
transcript=PF3D7_1134000.1	>PF3D7_1134000.1-p1 | transcript=PF3D7_1134000.1 | gene=PF3D7_1134000 | organism=Plasmodium_falciparum_3D7 | gene_product=heat shock protein 70 | transcript_product=heat shock protein 70 | location=Pf3D7_11_v3:1320114-1322105(+) | protein_length=663 | sequence_SO=chromosome | SO=protein_coding | is_pseudo=false	89	89	89	89	89	89	89	89	89	89	89	89	1068	10175300	11351644	9892830	8993235	9636489	11168317	8.2956e+06	10094885	8790659	7183038	6839084	6677996		1.01033e+07	9.79882e+06	7.37269e+06	2.72748e+07		1.37036	1.32907		0.00730035	0.0206081
transcript=PF3D7_1130100.1	>PF3D7_1130100.1-p1 | transcript=PF3D7_1130100.1 | gene=PF3D7_1130100 | organism=Plasmodium_falciparum_3D7 | gene_product=60S ribosomal protein L38 | transcript_product=60S ribosomal protein L38 | location=Pf3D7_11_v3:1163094-1163357(-) | protein_length=87 | sequence_SO=chromosome | SO=protein_coding | is_pseudo=false	10	10	10	10	10	10	10	10	10	10	10	10	120	1.84902e+06	2302526	2.04509e+06	1.70873e+06	2.19334e+06	1.86933e+06	2.33635e+06	2.37579e+06	1.46135e+06	1.32691e+06	1.30335e+06	1.79228e+06		1.97634e+06	2193702	1470971	5.64101e+06		1.34356	1.49133		0.0260057	0.00415185
transcript=PF3D7_1366500.1	>PF3D7_1366500.1-p1 | transcript=PF3D7_1366500.1 | gene=PF3D7_1366500 | organism=Plasmodium_falciparum_3D7 | gene_product=nucleoside diphosphate kinase | transcript_product=nucleoside diphosphate kinase | location=Pf3D7_13_v3:2661573-2662022(+) | protein_length=149 | sequence_SO=chromosome | SO=protein_coding | is_pseudo=false	19	19	19	19	19	19	19	19	19	19	19	19	228	1.90706e+06	2036147	1.98959e+06	1.87555e+06	2187616	1.93771e+06	2089634	2.32206e+06	1.45891e+06	1.80037e+06	1.79899e+06	1.45068e+06		1.95209e+06	2.13426e+06	1.62724e+06	5.71358e+06		1.19963	1.31158		0.0402025	0.00817699
transcript=PF3D7_1446200.1	>PF3D7_1446200.1-p1 | transcript=PF3D7_1446200.1 | gene=PF3D7_1446200 | organism=Plasmodium_falciparum_3D7 | gene_product=M17 leucyl aminopeptidase | transcript_product=M17 leucyl aminopeptidase | location=Pf3D7_14_v3:1893200-1895017(-) | protein_length=605 | sequence_SO=chromosome | SO=protein_coding | is_pseudo=false	45	45	45	45	45	45	45	45	45	45	45	45	540	3.51115e+06	3.79404e+06	3.60772e+06	2.85613e+06	3.60438e+06	3079467	4.02663e+06	4449020	2.90604e+06	3.01149e+06	3048849	3.24558e+06		3.44226e+06	3.78988e+06	3.05299e+06	1.02851e+07		1.1275	1.24137		0.151324	0.0831574
A0A024RA52;P25787	>tr|A0A024RA52|A0A024RA52_HUMAN Proteasome subunit alpha type OS=Homo sapiens GN=PSMA2 PE=1 SV=1;>sp|P25787|PSA2_HUMAN Proteasome subunit alpha type-2 OS=Homo sapiens GN=PSMA2 PE=1 SV=2	7	7	7	7	7	7	7	7	7	7	7	7	84	241521	146339	365063	287257	175759	346421	291162	313291	289238	154893	342368	305742		260045	281658	273061	814764		0.952335	1.03149		0.839045	0.881436
A0A075B7B1;H0YL34	>tr|A0A075B7B1|A0A075B7B1_HUMAN Desmuslin, isoform CRA_a OS=Homo sapiens GN=SYNM PE=1 SV=1;>tr|H0YL34|H0YL34_HUMAN Synemin OS=Homo sapiens GN=SYNM PE=1 SV=1	2	2	2	2	2	2	2	2	2	2	2	2	24	26707.8	252132	46617.8	23155.5	145244	118991	164473	72546.6	131206	195185	123295	139350		87153.2	125314	147259	359726		0.591835	0.850974		0.362965	0.427704
A0A075B7C0;A0A0C4DGQ5;K7EIV0;K7ELJ7;P04632;U3KQE2	>tr|A0A075B7C0|A0A075B7C0_HUMAN Calpain small subunit 1 (Fragment) OS=Homo sapiens GN=CAPNS1 PE=1 SV=1;>tr|A0A0C4DGQ5|A0A0C4DGQ5_HUMAN Calpain small subunit 1 OS=Homo sapiens GN=CAPNS1 PE=1 SV=1;>tr|K7EIV0|K7EIV0_HUMAN Calpain small subunit 1 (Fragment) OS=Homo sapiens GN=CAPNS1 PE=1 SV=2;>tr|K7ELJ7|K7ELJ7_HUMAN Calpain small subunit 1 OS=Homo sapiens GN=CAPNS1 PE=1 SV=1;>sp|P04632|CPNS1_HUMAN Ca…	5	5	5	5	5	5	5	5	5	5	5	5	60	165341	152820	180720	165529	95623.1	89002.4	167454	168317	86365.8	90833	91156.5	78566.3		166103	130099	86730.4	382932		1.91516	1.50004		0.000124003	0.140751
A0A087WSW9;A0A087WSY9;A0A182DWI3;E9PIR7;F8W809;Q16881	>tr|A0A087WSW9|A0A087WSW9_HUMAN Thioredoxin reductase 1, cytoplasmic OS=Homo sapiens GN=TXNRD1 PE=1 SV=1;>tr|A0A087WSY9|A0A087WSY9_HUMAN Thioredoxin reductase 1, cytoplasmic OS=Homo sapiens GN=TXNRD1 PE=1 SV=2;>tr|A0A182DWI3|A0A182DWI3_HUMAN Thioredoxin reductase 1, cytoplasmic OS=Homo sapiens GN=TXNRD1 PE=1 SV=1;>tr|E9PIR7|E9PIR7_HUMAN Thioredoxin reductase 1, cytoplasmic OS=Homo sapiens GN=TXNR…	6	6	6	6	6	6	6	6	6	6	6	6	72	88878	212614	167104	157387	200723	159165	198185	258550	205085	169403	181985	240494		156496	204156	199242	559893		0.785456	1.02466		0.213154	0.855355
A0A087WUQ6;P07203	>tr|A0A087WUQ6|A0A087WUQ6_HUMAN Glutathione peroxidase OS=Homo sapiens GN=GPX1 PE=1 SV=1;>sp|P07203|GPX1_HUMAN Glutathione peroxidase 1 OS=Homo sapiens GN=GPX1 PE=1 SV=4	9	9	9	9	9	9	9	9	9	9	9	9	108	1.31767e+06	1.73477e+06	1.29313e+06	1371165	1.57021e+06	1.21315e+06	1.41785e+06	1.56788e+06	1.32785e+06	1.33225e+06	1.38016e+06	1.15018e+06		1.42918e+06	1.44227e+06	1.29761e+06	4.16907e+06		1.1014	1.11149		0.310982	0.20203
A0A087WUX6;A0A087WX59;Q16186	>tr|A0A087WUX6|A0A087WUX6_HUMAN Proteasomal ubiquitin receptor ADRM1 (Fragment) OS=Homo sapiens GN=ADRM1 PE=1 SV=1;>tr|A0A087WX59|A0A087WX59_HUMAN Proteasomal ubiquitin receptor ADRM1 OS=Homo sapiens GN=ADRM1 PE=1 SV=1;>sp|Q16186|ADRM1_HUMAN Proteasomal ubiquitin receptor ADRM1 OS=Homo sapiens GN=ADRM1 PE=1 SV=2	1	1	1	1	1	1	1	1	1	1	1	1	12	37243.5	19806.9	18214.4	24405.4	30945.7	15167.7	28073.3	14955.8	13233	21377.1	16945.2	14180.5		24917.6	22285.6	16433.9	63637.1		1.51623	1.35607		0.143591	0.270042
A0A087WVQ6;Q00610	>tr|A0A087WVQ6|A0A087WVQ6_HUMAN Clathrin heavy chain OS=Homo sapiens GN=CLTC PE=1 SV=1;>sp|Q00610|CLH1_HUMAN Clathrin heavy chain 1 OS=Homo sapiens GN=CLTC PE=1 SV=5	32	32	32	32	32	32	32	32	32	32	32	32	384	102232	46559.9	100477	94024.2	80849.7	87449.3	95238.1	61297	90204.2	90502.8	115731	79467.7		85823.3	81208.5	93976.3	261008		0.913243	0.864138		0.617353	0.272942
A0A087WVQ9;P68104;Q05639;Q5VTE0	>tr|A0A087WVQ9|A0A087WVQ9_HUMAN Elongation factor 1-alpha 1 OS=Homo sapiens GN=EEF1A1 PE=1 SV=1;>sp|P68104|EF1A1_HUMAN Elongation factor 1-alpha 1 OS=Homo sapiens GN=EEF1A1 PE=1 SV=1;>sp|Q05639|EF1A2_HUMAN Elongation factor 1-alpha 2 OS=Homo sapiens GN=EEF1A2 PE=1 SV=1;>sp|Q5VTE0|EF1A3_HUMAN Putative elongation factor 1-alpha-like 3 OS=Homo sapiens GN=EEF1A1P5 PE=5 SV=1	1	1	1	1	1	1	1	1	1	1	1	1	12	1.00665e+06	1.04466e+06	740254	1.0422e+06	1.30661e+06	1.04188e+06	916217	1.1198e+06	1.06598e+06	1.39519e+06	903988	1.34631e+06		958442	1.09613e+06	1.17787e+06	3.23243e+06		0.81371	0.930602		0.171348	0.589117
A0A087WW66;Q99460	>tr|A0A087WW66|A0A087WW66_HUMAN 26S proteasome non-ATPase regulatory subunit 1 OS=Homo sapiens GN=PSMD1 PE=1 SV=1;>sp|Q99460|PSMD1_HUMAN 26S proteasome non-ATPase regulatory subunit 1 OS=Homo sapiens GN=PSMD1 PE=1 SV=2	17	17	17	17	17	17	17	17	17	17	17	17	204	131697	29725.1	93219.6	105275	96630.8	66907.8	97319.1	114339	66634.5	104993	106602	91557.2		89979.2	93799.2	92446.6	276225		0.97331	1.01463		0.921439	0.923525
A0A087WWM4;F8WAN9;H0YKE1;H0YLB8;H0YLV5;H0YMB3;H0YNJ6;H0YNS9;Q9P2T1	>tr|A0A087WWM4|A0A087WWM4_HUMAN GMP reductase OS=Homo sapiens GN=GMPR2 PE=1 SV=1;>tr|F8WAN9|F8WAN9_HUMAN GMP reductase OS=Homo sapiens GN=GMPR2 PE=1 SV=1;>tr|H0YKE1|H0YKE1_HUMAN GMP reductase 2 (Fragment) OS=Homo sapiens GN=GMPR2 PE=1 SV=1;>tr|H0YLB8|H0YLB8_HUMAN GMP reductase 2 (Fragment) OS=Homo sapiens GN=GMPR2 PE=1 SV=1;>tr|H0YLV5|H0YLV5_HUMAN GMP reductase OS=Homo sapiens GN=GMPR2 PE=1 SV=1;…	1	1	1	1	1	1	1	1	1	1	1	1	12	20430.1	22841.7	19157.9	17833.4	22795.1	16398.7	15762.3	23377	14702.4	21640	17442.6	17943.4		20065.8	19583.3	17932.1	57581.2		1.11899	1.09208		0.279522	0.533175
A0A087WXS7;K7ERW9;O43681	>tr|A0A087WXS7|A0A087WXS7_HUMAN ATPase ASNA1 OS=Homo sapiens GN=ASNA1 PE=1 SV=1;>tr|K7ERW9|K7ERW9_HUMAN Arsenical pump-driving ATPase (Fragment) OS=Homo sapiens GN=ASNA1 PE=1 SV=1;>sp|O43681|ASNA_HUMAN ATPase ASNA1 OS=Homo sapiens GN=ASNA1 PE=1 SV=2	1	1	1	1	1	1	1	1	1	1	1	1	12	3987.14	3624.75	14818.5	4304.65	13141.5	5536.73	4293.46	22046.3	51266.9	8841.43	5875.9	3724.85		6683.76	11254.5	17427.3	35365.5		0.383523	0.645798		0.418012	0.636888
A0A087WY55;Q9NP79	>tr|A0A087WY55|A0A087WY55_HUMAN Chromosome 6 open reading frame 55, isoform CRA_b OS=Homo sapiens GN=VTA1 PE=1 SV=1;>sp|Q9NP79|VTA1_HUMAN Vacuolar protein sorting-associated protein VTA1 homolog OS=Homo sapiens GN=VTA1 PE=1 SV=1	2	2	2	2	2	2	2	2	2	2	2	2	24	80984.4	70136.3	85951	105659	46354.5	19848.8	93852.2	82911.2	69638.6	106690	78268	15152.1		85682.7	60741.7	67437.1	213862		1.27056	0.900716		0.425829	0.802533
A0A087X0A8;D6RGG3;H0Y4P7;Q99715	>tr|A0A087X0A8|A0A087X0A8_HUMAN Collagen alpha-1(XII) chain OS=Homo sapiens GN=COL12A1 PE=1 SV=1;>tr|D6RGG3|D6RGG3_HUMAN Collagen alpha-1(XII) chain OS=Homo sapiens GN=COL12A1 PE=1 SV=1;>tr|H0Y4P7|H0Y4P7_HUMAN Collagen alpha-1(XII) chain (Fragment) OS=Homo sapiens GN=COL12A1 PE=1 SV=1;>sp|Q99715|COCA1_HUMAN Collagen alpha-1(XII) chain OS=Homo sapiens GN=COL12A1 PE=1 SV=2	1	1	1	1	1	1	1	1	1	1	1	1	12	75407.4	133769	126081	150319	170523	117104	102902	162265	137347	128375	132910	73300.5		121394	138198	117983	377576		1.02891	1.17134		0.882115	0.40179
A0A087X1Z3;Q9UL46	>tr|A0A087X1Z3|A0A087X1Z3_HUMAN Proteasome activator complex subunit 2 OS=Homo sapiens GN=PSME2 PE=1 SV=1;>sp|Q9UL46|PSME2_HUMAN Proteasome activator complex subunit 2 OS=Homo sapiens GN=PSME2 PE=1 SV=4	12	12	12	12	12	12	12	12	12	12	12	12	144	92176.7	66848	93467.1	56688.1	100272	54586.5	110375	113042	98322.9	40680.7	72465	93667.7		77295	94568.9	76284.1	248148		1.01325	1.23969		0.952022	0.371026
A0A087X253;P63010	>tr|A0A087X253|A0A087X253_HUMAN AP complex subunit beta OS=Homo sapiens GN=AP2B1 PE=1 SV=1;>sp|P63010|AP2B1_HUMAN AP-2 complex subunit beta OS=Homo sapiens GN=AP2B1 PE=1 SV=1	1	1	1	1	1	1	1	1	1	1	1	1	12	7953.63	36075.2	20448.3	12553.6	28167.1	12639.1	35372.9	15976.5	13070.6	15312.6	18026.3	16850		19257.7	23038.9	15814.9	58111.5		1.2177	1.45679		0.618789	0.267167
A0A087X2I1;P62333	>tr|A0A087X2I1|A0A087X2I1_HUMAN 26S proteasome regulatory subunit 10B OS=Homo sapiens GN=PSMC6 PE=1 SV=1;>sp|P62333|PRS10_HUMAN 26S proteasome regulatory subunit 10B OS=Homo sapiens GN=PSMC6 PE=1 SV=1	15	15	15	15	15	15	15	15	15	15	15	15	180	182721	173449	182748	168623	169748	126801	179380	219435	187000	161634	112236	147152		176885	173841	152005	502732		1.16368	1.14365		0.209444	0.410136
A0A0A0MRA3;A0A0A0MTS7;Q8WZ42	>tr|A0A0A0MRA3|A0A0A0MRA3_HUMAN Titin OS=Homo sapiens GN=TTN PE=1 SV=1;>tr|A0A0A0MTS7|A0A0A0MTS7_HUMAN Titin OS=Homo sapiens GN=TTN PE=1 SV=1;>sp|Q8WZ42|TITIN_HUMAN Titin OS=Homo sapiens GN=TTN PE=1 SV=4	2	2	2	2	2	2	2	2	2	2	2	2	24	356718240	431198304	335982656	369684512	427384992	364930176	358604256	384556640	405154496	347668672	350752128	375617632		373395928	383869016	369798232	1127063176		1.00973	1.03805		0.888563	0.518041
A0A0A0MS58;Q8TCA0;X6RK58	>tr|A0A0A0MS58|A0A0A0MS58_HUMAN Leucine rich repeat containing 20, isoform CRA_e OS=Homo sapiens GN=LRRC20 PE=1 SV=1;>sp|Q8TCA0|LRC20_HUMAN Leucine-rich repeat-containing protein 20 OS=Homo sapiens GN=LRRC20 PE=1 SV=1;>tr|X6RK58|X6RK58_HUMAN Leucine-rich repeat-containing protein 20 (Fragment) OS=Homo sapiens GN=LRRC20 PE=1 SV=7	1	1	1	1	1	1	1	1	1	1	1	1	12	3325783	3077725	795102	3149757	484442	899754	519933	1.12635e+06	3.03505e+06	2325936	3.2178e+06	3.44952e+06		2.58709e+06	757619	3.00708e+06	6.35179e+06		0.860334	0.251945		0.551866	0.000501211
A0A0A0MSI0;Q06830	>tr|A0A0A0MSI0|A0A0A0MSI0_HUMAN Peroxiredoxin-1 (Fragment) OS=Homo sapiens GN=PRDX1 PE=1 SV=1;>sp|Q06830|PRDX1_HUMAN Peroxiredoxin-1 OS=Homo sapiens GN=PRDX1 PE=1 SV=1	13	13	13	13	13	13	13	13	13	13	13	13	156	21444074	27591894	22740394	21915116	26459966	19572078	22256996	24121194	23921670	18550908	20784020	22064690		2.34229e+07	2.31026e+07	21330322	67855750		1.0981	1.08309		0.293662	0.375642
A0A0A0MSJ3;E9PFK9;Q3HKR1;Q9UJ41	>tr|A0A0A0MSJ3|A0A0A0MSJ3_HUMAN RAB guanine nucleotide exchange factor (GEF) 1, isoform CRA_c OS=Homo sapiens GN=RABGEF1 PE=1 SV=1;>tr|E9PFK9|E9PFK9_HUMAN Rab5 GDP/GTP exchange factor OS=Homo sapiens GN=RABGEF1 PE=1 SV=1;>tr|Q3HKR1|Q3HKR1_HUMAN RAP1 short isoform OS=Homo sapiens GN=RABGEF1 PE=1 SV=1;>sp|Q9UJ41|RABX5_HUMAN Rab5 GDP/GTP exchange factor OS=Homo sapiens GN=RABGEF1 PE=1 SV=2	1	1	1	1	1	1	1	1	1	1	1	1	12	702892	619616	639329	565600	592220	675290	548937	593781	809388	714442	533257	587282		631860	602557	661092	1.89551e+06		0.955781	0.911457		0.690479	0.435464
A0A0B4J296;B8ZZU8;I3L0M9;Q15370	>tr|A0A0B4J296|A0A0B4J296_HUMAN Elongin-B OS=Homo sapiens GN=ELOB PE=1 SV=1;>tr|B8ZZU8|B8ZZU8_HUMAN Elongin-B OS=Homo sapiens GN=ELOB PE=1 SV=1;>tr|I3L0M9|I3L0M9_HUMAN Elongin-B (Fragment) OS=Homo sapiens GN=ELOB PE=1 SV=1;>sp|Q15370|ELOB_HUMAN Elongin-B OS=Homo sapiens GN=ELOB PE=1 SV=1	1	1	1	1	1	1	1	1	1	1	1	1	12	716038	1.04725e+06	703555	634824	15786.7	977754	57616.6	1.08804e+06	768243	78865.8	622870	812116		775417	534800	570524	1.88074e+06		1.35913	0.937385		0.339099	0.919195
A0A0C4DGB5;B7Z574;E7EQ12;E7ES10;E9PCH5;E9PDE4;H0Y7F0;P20810	>tr|A0A0C4DGB5|A0A0C4DGB5_HUMAN Calpastatin OS=Homo sapiens GN=CAST PE=1 SV=1;>tr|B7Z574|B7Z574_HUMAN Calpastatin OS=Homo sapiens GN=CAST PE=1 SV=1;>tr|E7EQ12|E7EQ12_HUMAN Calpastatin OS=Homo sapiens GN=CAST PE=1 SV=1;>tr|E7ES10|E7ES10_HUMAN Calpastatin (Fragment) OS=Homo sapiens GN=CAST PE=1 SV=1;>tr|E9PCH5|E9PCH5_HUMAN Calpastatin OS=Homo sapiens GN=CAST PE=1 SV=1;>tr|E9PDE4|E9PDE4_HUMAN Calpas…	7	7	7	7	7	7	7	7	7	7	7	7	84	452525	377653	645809	419993	412759	428305	378545	619423	493762	369506	345527	363545		473995	459758	393085	1.32684e+06		1.20583	1.16961		0.291847	0.344735
A0A0C4DGK4;A0A0U1RQC5;A0A0U1RRJ0;Q9HDB5;Q9Y4C0	>tr|A0A0C4DGK4|A0A0C4DGK4_HUMAN Neurexin-3-beta OS=Homo sapiens GN=NRXN3 PE=1 SV=1;>tr|A0A0U1RQC5|A0A0U1RQC5_HUMAN Neurexin-3-beta OS=Homo sapiens GN=NRXN3 PE=1 SV=1;>tr|A0A0U1RRJ0|A0A0U1RRJ0_HUMAN Neurexin-3-beta OS=Homo sapiens GN=NRXN3 PE=1 SV=1;>sp|Q9HDB5|NRX3B_HUMAN Neurexin-3-beta OS=Homo sapiens GN=NRXN3 PE=1 SV=4;>sp|Q9Y4C0|NRX3A_HUMAN Neurexin-3 OS=Homo sapiens GN=NRXN3 PE=1 SV=4	2	2	2	2	2	2	2	2	2	2	2	2	24	69255.9	28574.7	68718.7	37369.5	32787.4	24275.1	36596.3	46183.9	17292.9	20363.4	22143.9	30814.3		50979.7	34960.7	22653.6	108594		2.2504	1.54327		0.0704457	0.0701765
A0A0G2JIW1;P0DMV8;P0DMV9	>tr|A0A0G2JIW1|A0A0G2JIW1_HUMAN Heat shock 70 kDa protein 1B OS=Homo sapiens GN=HSPA1B PE=1 SV=1;>sp|P0DMV8|HS71A_HUMAN Heat shock 70 kDa protein 1A OS=Homo sapiens GN=HSPA1A PE=1 SV=1;>sp|P0DMV9|HS71B_HUMAN Heat shock 70 kDa protein 1B OS=Homo sapiens GN=HSPA1B PE=1 SV=1	38	38	38	38	38	38	38	38	38	38	38	38	456	1.74099e+06	1.00101e+06	1.4972e+06	1.72837e+06	1.32627e+06	1.79467e+06	1.43163e+06	1.12468e+06	1.80429e+06	2039232	1.85443e+06	1.71153e+06		1.49189e+06	1.41931e+06	1.85237e+06	4.76358e+06		0.805398	0.766214		0.126211	0.0457078
A0A0U1RQF0;P49327	>tr|A0A0U1RQF0|A0A0U1RQF0_HUMAN Fatty acid synthase OS=Homo sapiens GN=FASN PE=1 SV=1;>sp|P49327|FAS_HUMAN Fatty acid synthase OS=Homo sapiens GN=FASN PE=1 SV=3	32	32	32	32	32	32	32	32	32	32	32	32	384	19285.6	17666.3	23019.7	21904.7	21898	16429.8	17493.6	24143.2	25310	25637.2	15941.8	21228.1		20469.1	19991.1	22029.3	62489.5		0.929177	0.90748		0.572579	0.510387
A0A140T9R1;O75955	>tr|A0A140T9R1|A0A140T9R1_HUMAN Flotillin-1 (Fragment) OS=Homo sapiens GN=FLOT1 PE=1 SV=1;>sp|O75955|FLOT1_HUMAN Flotillin-1 OS=Homo sapiens GN=FLOT1 PE=1 SV=3	10	10	10	10	10	10	10	10	10	10	10	10	120	50564.2	62817.4	82352	68071.2	60115	88437.2	52219.7	66300.2	63791.8	26124.5	79316.1	53037.7		65951.2	66768	55567.5	188287		1.18687	1.20157		0.461411	0.446421
A0A1B0GVN9;H0Y5R6;P06132	>tr|A0A1B0GVN9|A0A1B0GVN9_HUMAN Uroporphyrinogen decarboxylase OS=Homo sapiens GN=UROD PE=1 SV=1;>tr|H0Y5R6|H0Y5R6_HUMAN Uroporphyrinogen decarboxylase (Fragment) OS=Homo sapiens GN=UROD PE=1 SV=1;>sp|P06132|DCUP_HUMAN Uroporphyrinogen decarboxylase OS=Homo sapiens GN=UROD PE=1 SV=2	2	2	2	2	2	2	2	2	2	2	2	2	24	72241	39619.5	20976.4	42245.3	37150.1	52119.4	47912.7	50925.9	36612.5	35364.7	54563.5	53901		43770.6	47027	45110.4	135908		0.970298	1.04249		0.914912	0.772219
A0A1B0GWD2	>tr|A0A1B0GWD2|A0A1B0GWD2_HUMAN UBAP1-MVB12-associated (UMA)-domain-containing protein 1 OS=Homo sapiens GN=UMAD1 PE=4 SV=1	1	1	1	1	1	1	1	1	1	1	1	1	12	20628.9	14852.4	32753.2	15273.2	35063.2	15836.6	14563.3	19670	22230.8	14209	17360.8	20745.5		20877	21283.3	18636.5	60796.8		1.12022	1.14202		0.647137	0.628863
A0A1B0GWG0	>tr|A0A1B0GWG0|A0A1B0GWG0_HUMAN Protein 4.1 (Fragment) OS=Homo sapiens GN=EPB41 PE=1 SV=1	4	4	4	4	4	4	4	4	4	4	4	4	48	57462.5	107569	46802.6	56877.3	54896.6	16136.8	48548.6	61453.8	123711	20814.4	94146	114287		67177.7	45258.9	88239.6	200676		0.76131	0.51291		0.472092	0.164252
A2RRP1;H0Y5G7;H7BZR3;H7C1Y9	>sp|A2RRP1|NBAS_HUMAN Neuroblastoma-amplified sequence OS=Homo sapiens GN=NBAS PE=1 SV=2;>tr|H0Y5G7|H0Y5G7_HUMAN Neuroblastoma-amplified sequence (Fragment) OS=Homo sapiens GN=NBAS PE=1 SV=1;>tr|H7BZR3|H7BZR3_HUMAN Neuroblastoma-amplified sequence (Fragment) OS=Homo sapiens GN=NBAS PE=1 SV=1;>tr|H7C1Y9|H7C1Y9_HUMAN Neuroblastoma-amplified sequence (Fragment) OS=Homo sapiens GN=NBAS PE=1 SV=1	1	1	1	1	1	1	1	1	1	1	1	1	12	171141	164112	170530	137916	250070	227872	178825	265721	130936	147557	122513	126107		160925	230622	131778	523325		1.22118	1.75008		0.0260967	0.0104054
A6NFX8;Q9UKK9	>tr|A6NFX8|A6NFX8_HUMAN ADP-sugar pyrophosphatase OS=Homo sapiens GN=NUDT5 PE=1 SV=1;>sp|Q9UKK9|NUDT5_HUMAN ADP-sugar pyrophosphatase OS=Homo sapiens GN=NUDT5 PE=1 SV=1	12	12	12	12	12	12	12	12	12	12	12	12	144	314655	326450	298697	266590	337220	237200	275853	345962	263233	264837	269831	234950		301598	299059	258213	858870		1.16802	1.15819		0.0359718	0.213946
A6NG10;B4DFG2;K7EIJ0;K7EMC9;K7ENL2;Q969T9	>tr|A6NG10|A6NG10_HUMAN WW domain-binding protein 2 OS=Homo sapiens GN=WBP2 PE=1 SV=2;>tr|B4DFG2|B4DFG2_HUMAN WW domain-binding protein 2 OS=Homo sapiens GN=WBP2 PE=1 SV=1;>tr|K7EIJ0|K7EIJ0_HUMAN WW domain-binding protein 2 (Fragment) OS=Homo sapiens GN=WBP2 PE=1 SV=1;>tr|K7EMC9|K7EMC9_HUMAN WW domain-binding protein 2 OS=Homo sapiens GN=WBP2 PE=1 SV=1;>tr|K7ENL2|K7ENL2_HUMAN WW domain-binding pr…	2	2	2	2	2	2	2	2	2	2	2	2	24	41033.7	31624.5	34001.9	26456.7	49102.6	55917.7	36141.3	42015.3	36611.3	30226.9	30143.5	34335.4		33279.2	45794.2	32829.3	111903		1.01371	1.39492		0.900996	0.0499133
A6NHG4;B5MC82;J3KQ18;P30046	>sp|A6NHG4|DDTL_HUMAN D-dopachrome decarboxylase-like protein OS=Homo sapiens GN=DDTL PE=2 SV=1;>tr|B5MC82|B5MC82_HUMAN D-dopachrome decarboxylase OS=Homo sapiens GN=DDT PE=4 SV=2;>tr|J3KQ18|J3KQ18_HUMAN D-dopachrome decarboxylase OS=Homo sapiens GN=DDT PE=1 SV=1;>sp|P30046|DOPD_HUMAN D-dopachrome decarboxylase OS=Homo sapiens GN=DDT PE=1 SV=3	1	1	1	1	1	1	1	1	1	1	1	1	12	228375	392768	268421	230736	374670	217315	286212	335041	321744	328851	338448	365671		280075	303310	338678	922063		0.826964	0.895568		0.228035	0.380069
A6NJA2;P54578	>tr|A6NJA2|A6NJA2_HUMAN Ubiquitin carboxyl-terminal hydrolase 14 OS=Homo sapiens GN=USP14 PE=1 SV=2;>sp|P54578|UBP14_HUMAN Ubiquitin carboxyl-terminal hydrolase 14 OS=Homo sapiens GN=USP14 PE=1 SV=3	4	4	4	4	4	4	4	4	4	4	4	4	48	45316.9	27421.4	37067.3	37758.8	27083.3	31594.7	21955.9	43762.4	52870.6	18293	20857.7	54088.2		36891.1	31099.1	36527.4	104518		1.00996	0.851391		0.974023	0.641589
A6NMU3;Q92783	>tr|A6NMU3|A6NMU3_HUMAN Signal transducing adapter molecule 1 (Fragment) OS=Homo sapiens GN=STAM PE=1 SV=2;>sp|Q92783|STAM1_HUMAN Signal transducing adapter molecule 1 OS=Homo sapiens GN=STAM PE=1 SV=3	1	1	1	1	1	1	1	1	1	1	1	1	12	29006.9	73753.1	34348.9	21476.1	49454.3	44667.6	33905.5	13988.8	15810	19979.6	36921.6	14753.7		39646.2	35504	21866.2	97016.5		1.81313	1.62369		0.233755	0.204929
A8MTM1;E9PQ63;P16152	>tr|A8MTM1|A8MTM1_HUMAN Carbonyl reductase [NADPH] 1 OS=Homo sapiens GN=CBR1 PE=1 SV=1;>tr|E9PQ63|E9PQ63_HUMAN Carbonyl reductase [NADPH] 1 OS=Homo sapiens GN=CBR1 PE=1 SV=1;>sp|P16152|CBR1_HUMAN Carbonyl reductase [NADPH] 1 OS=Homo sapiens GN=CBR1 PE=1 SV=3	3	3	3	3	3	3	3	3	3	3	3	3	36	29309.8	19001.3	36234.6	39714.6	18695.6	23230.9	29691.5	34429.4	34843.9	25952.3	36512.2	39886.3		31065.1	26511.9	34298.7	91875.6		0.905723	0.772971		0.577934	0.140537
B0YIW2;P02656	>tr|B0YIW2|B0YIW2_HUMAN Apolipoprotein C-III OS=Homo sapiens GN=APOC3 PE=1 SV=1;>sp|P02656|APOC3_HUMAN Apolipoprotein C-III OS=Homo sapiens GN=APOC3 PE=1 SV=1	3	3	3	3	3	3	3	3	3	3	3	3	36	94251.1	76058.2	88917.6	96614.9	78510.5	89813.1	96070.5	80044.6	82561.7	68947.5	74405.3	78543.4		88960.4	86109.7	76114.5	251185		1.16877	1.13132		0.0637809	0.102084
B1AJY5;B1AJY7;O75832	>tr|B1AJY5|B1AJY5_HUMAN 26S proteasome non-ATPase regulatory subunit 10 OS=Homo sapiens GN=PSMD10 PE=1 SV=1;>tr|B1AJY7|B1AJY7_HUMAN 26S proteasome non-ATPase regulatory subunit 10 OS=Homo sapiens GN=PSMD10 PE=1 SV=1;>sp|O75832|PSD10_HUMAN 26S proteasome non-ATPase regulatory subunit 10 OS=Homo sapiens GN=PSMD10 PE=1 SV=1	2	2	2	2	2	2	2	2	2	2	2	2	24	15652.2	32075.5	26978.3	29261.2	24720.8	27223.9	23673	34987.1	28163.7	15581.8	26601.1	35099.2		25991.8	27651.2	26361.4	80004.4		0.985978	1.04893		0.947791	0.797963
B1AN99;P35030	>tr|B1AN99|B1AN99_HUMAN Trypsin-3 (Fragment) OS=Homo sapiens GN=PRSS3 PE=1 SV=8;>sp|P35030|TRY3_HUMAN Trypsin-3 OS=Homo sapiens GN=PRSS3 PE=1 SV=2	1	1	1	1	1	1	1	1	1	1	1	1	12	31659.1	52623	36792.8	39236.6	53349.6	41133.5	43068.4	53967.4	20726.6	39452.5	33332	33136.6		40077.9	47879.7	31661.9	119620		1.26581	1.51222		0.207824	0.0208086
B1AUU8;P42566	>tr|B1AUU8|B1AUU8_HUMAN Epidermal growth factor receptor substrate 15 OS=Homo sapiens GN=EPS15 PE=1 SV=1;>sp|P42566|EPS15_HUMAN Epidermal growth factor receptor substrate 15 OS=Homo sapiens GN=EPS15 PE=1 SV=2	8	8	8	8	8	8	8	8	8	8	8	8	96	34051.5	57521.7	22345.3	49089.7	82347	50866.3	51779.7	48628	31122.5	47976.3	50482.1	25907.2		40752	58405.3	38872	138029		1.04836	1.5025		0.856262	0.103732
B4DIH5;P61201	>tr|B4DIH5|B4DIH5_HUMAN COP9 signalosome complex subunit 2 OS=Homo sapiens GN=COPS2 PE=1 SV=1;>sp|P61201|CSN2_HUMAN COP9 signalosome complex subunit 2 OS=Homo sapiens GN=COPS2 PE=1 SV=1	4	4	4	4	4	4	4	4	4	4	4	4	48	39481.2	25157.6	22168.7	23191.6	20540.1	25968.5	25394.3	17502.3	38461.8	19709.2	43557.6	33566.4		27499.8	22351.3	33823.7	83674.8		0.813032	0.660817		0.372114	0.107454
B4DUC8;F2Z2F3;J3QSB7;Q13126	>tr|B4DUC8|B4DUC8_HUMAN S-methyl-5'-thioadenosine phosphorylase OS=Homo sapiens GN=MTAP PE=1 SV=1;>tr|F2Z2F3|F2Z2F3_HUMAN Uncharacterized protein OS=Homo sapiens PE=4 SV=1;>tr|J3QSB7|J3QSB7_HUMAN Purine nucleoside phosphorylase OS=Homo sapiens GN=MTAP PE=1 SV=1;>sp|Q13126|MTAP_HUMAN S-methyl-5'-thioadenosine phosphorylase OS=Homo sapiens GN=MTAP PE=1 SV=2	6	6	6	6	6	6	6	6	6	6	6	6	72	160228	251360	184157	137147	243601	133150	184328	18589.3	221859	220667	218911	146649		183223	144917	202021	530161		0.906948	0.717336		0.565794	0.329195
B4DUR8;P49368	>tr|B4DUR8|B4DUR8_HUMAN T-complex protein 1 subunit gamma OS=Homo sapiens GN=CCT3 PE=1 SV=1;>sp|P49368|TCPG_HUMAN T-complex protein 1 subunit gamma OS=Homo sapiens GN=CCT3 PE=1 SV=4	13	13	13	13	13	13	13	13	13	13	13	13	156	79069	22145.5	40672.9	130514	82207.3	115098	67864.4	95139.4	201428	140506	141419	108825		68100.4	90077.4	148044	306222		0.46	0.608448		0.0424663	0.0498461
B4DV12;F5GXK7;F5GYU3;F5H265;F5H2Z3;F5H388;F5H6Q2;F5H747;J3QKN0;J3QS39;J3QTR3;P0CG47;P0CG48;P62979;P62987;Q5PY61;Q96C32	>tr|B4DV12|B4DV12_HUMAN Polyubiquitin-B OS=Homo sapiens GN=UBB PE=1 SV=1;>tr|F5GXK7|F5GXK7_HUMAN Polyubiquitin-C (Fragment) OS=Homo sapiens GN=UBC PE=1 SV=2;>tr|F5GYU3|F5GYU3_HUMAN Polyubiquitin-C (Fragment) OS=Homo sapiens GN=UBC PE=1 SV=1;>tr|F5H265|F5H265_HUMAN Polyubiquitin-C (Fragment) OS=Homo sapiens GN=UBC PE=1 SV=1;>tr|F5H2Z3|F5H2Z3_HUMAN Polyubiquitin-C (Fragment) OS=Homo sapiens GN=UBC …	11	11	11	11	11	11	11	11	11	11	11	11	132	17717176	18369800	16545283	19891780	21668884	17798872	19354084	20848742	18996878	17585270	17066270	20185278		1.8131e+07	1.99176e+07	18458424	5.65071e+07		0.982262	1.07905		0.752648	0.237256
B7Z9C2;F5H4R6;F8VUX1;F8VV59;F8VXI6;F8VY35;F8W020;F8W0J6;F8W118;H0YHC3;H0YIV4;P55209	>tr|B7Z9C2|B7Z9C2_HUMAN Nucleosome assembly protein 1-like 1 OS=Homo sapiens GN=NAP1L1 PE=1 SV=1;>tr|F5H4R6|F5H4R6_HUMAN Nucleosome assembly protein 1-like 1 OS=Homo sapiens GN=NAP1L1 PE=1 SV=1;>tr|F8VUX1|F8VUX1_HUMAN Nucleosome assembly protein 1-like 1 (Fragment) OS=Homo sapiens GN=NAP1L1 PE=1 SV=1;>tr|F8VV59|F8VV59_HUMAN Nucleosome assembly protein 1-like 1 OS=Homo sapiens GN=NAP1L1 PE=1 SV=1;…	4	4	4	4	4	4	4	4	4	4	4	4	48	32101.6	22612.9	44292.6	18860.4	35879.9	19909	25967.9	37935.9	54659.7	30920.5	21172	47298.6		29466.9	29923.2	38512.7	97902.7		0.765121	0.77697		0.380532	0.372464
B7ZAR1;E7ENZ3;E9PCA1;P48643	>tr|B7ZAR1|B7ZAR1_HUMAN T-complex protein 1 subunit epsilon OS=Homo sapiens GN=CCT5 PE=1 SV=1;>tr|E7ENZ3|E7ENZ3_HUMAN T-complex protein 1 subunit epsilon OS=Homo sapiens GN=CCT5 PE=1 SV=1;>tr|E9PCA1|E9PCA1_HUMAN T-complex protein 1 subunit epsilon OS=Homo sapiens GN=CCT5 PE=1 SV=1;>sp|P48643|TCPE_HUMAN T-complex protein 1 subunit epsilon OS=Homo sapiens GN=CCT5 PE=1 SV=1	5	5	5	5	5	5	5	5	5	5	5	5	60	41319.5	83176.2	63924.3	51147.6	38192.3	86463.5	51051.8	58791.5	71456.3	49972.6	65394.5	61681.6		59891.9	58624.8	62126.3	180643		0.964035	0.94364		0.834866	0.768973
C9J4W5;C9J7B5;F8WCJ1;I3L397;I3L504;P63241;Q6IS14;Q9GZV4	>tr|C9J4W5|C9J4W5_HUMAN Eukaryotic translation initiation factor 5A (Fragment) OS=Homo sapiens GN=EIF5A2 PE=1 SV=1;>tr|C9J7B5|C9J7B5_HUMAN Eukaryotic translation initiation factor 5A OS=Homo sapiens GN=EIF5A2 PE=1 SV=1;>tr|F8WCJ1|F8WCJ1_HUMAN Eukaryotic translation initiation factor 5A OS=Homo sapiens GN=EIF5A2 PE=1 SV=1;>tr|I3L397|I3L397_HUMAN Eukaryotic translation initiation factor 5A (Fragmen…	2	2	2	2	2	2	2	2	2	2	2	2	24	6741.17	33698.1	21049.4	31958.2	32215.4	7082.29	30258.5	23542.9	36575.8	11032.9	20573.6	22594.5		23361.7	23274.8	22694.2	69330.7		1.02941	1.02558		0.937393	0.942871
C9J6A7;Q2QD12;Q96AT9	>tr|C9J6A7|C9J6A7_HUMAN Ribulose-phosphate 3-epimerase (Fragment) OS=Homo sapiens GN=RPE PE=1 SV=1;>sp|Q2QD12|RPEL1_HUMAN Ribulose-phosphate 3-epimerase-like protein 1 OS=Homo sapiens GN=RPEL1 PE=2 SV=1;>sp|Q96AT9|RPE_HUMAN Ribulose-phosphate 3-epimerase OS=Homo sapiens GN=RPE PE=1 SV=1	1	1	1	1	1	1	1	1	1	1	1	1	12	43612.7	58087.1	63203.4	58191.2	66718.2	45211.3	39099.8	74921.3	38117.7	52309.4	40244.3	58864		55773.6	56487.6	47383.8	159645		1.17706	1.19213		0.245457	0.399856
C9J6D1;C9JZI7;E9PJJ2;E9PKT8;E9PNJ7;E9PNW0;E9PS34;Q99733	>tr|C9J6D1|C9J6D1_HUMAN Nucleosome assembly protein 1-like 4 (Fragment) OS=Homo sapiens GN=NAP1L4 PE=1 SV=1;>tr|C9JZI7|C9JZI7_HUMAN Nucleosome assembly protein 1-like 4 (Fragment) OS=Homo sapiens GN=NAP1L4 PE=1 SV=1;>tr|E9PJJ2|E9PJJ2_HUMAN Nucleosome assembly protein 1-like 4 (Fragment) OS=Homo sapiens GN=NAP1L4 PE=1 SV=1;>tr|E9PKT8|E9PKT8_HUMAN Nucleosome assembly protein 1-like 4 (Fragment) OS=…	3	3	3	3	3	3	3	3	3	3	3	3	36	56643	60128	46221.3	55726.4	51967.3	43615.6	53037.4	62128	66881.3	69014.2	55807.7	89923		54679.7	52687.1	70406.5	177773		0.776628	0.748327		0.110908	0.0844595
C9JIF9;P13798	>tr|C9JIF9|C9JIF9_HUMAN Acylamino-acid-releasing enzyme OS=Homo sapiens GN=APEH PE=1 SV=1;>sp|P13798|ACPH_HUMAN Acylamino-acid-releasing enzyme OS=Homo sapiens GN=APEH PE=1 SV=4	19	19	19	19	19	19	19	19	19	19	19	19	228	3.82392e+06	3.37283e+06	3739618	3662198	4.07129e+06	4.1818e+06	3.7494e+06	4276587	3.88303e+06	3.5491e+06	3.71529e+06	3.96674e+06		3.64964e+06	4.06977e+06	3.77854e+06	1.14979e+07		0.965886	1.07707		0.376176	0.097819
C9JLV5;J3KTQ1;J3QKR0;J3QL22;J3QS85;Q9UNS2	>tr|C9JLV5|C9JLV5_HUMAN COP9 signalosome complex subunit 3 (Fragment) OS=Homo sapiens GN=COPS3 PE=1 SV=8;>tr|J3KTQ1|J3KTQ1_HUMAN COP9 signalosome complex subunit 3 OS=Homo sapiens GN=COPS3 PE=1 SV=1;>tr|J3QKR0|J3QKR0_HUMAN COP9 signalosome complex subunit 3 OS=Homo sapiens GN=COPS3 PE=1 SV=1;>tr|J3QL22|J3QL22_HUMAN COP9 signalosome complex subunit 3 OS=Homo sapiens GN=COPS3 PE=1 SV=1;>tr|J3QS85|J…	1	1	1	1	1	1	1	1	1	1	1	1	12	646694	302374	412768	615324	502637	723128	695768	932283	532492	616664	556448	721606		494290	713454	606803	1.81455e+06		0.814581	1.17576		0.28415	0.331327
C9JNR4;C9JRM1;C9JX21;E9PLA2;E9PN11;E9PQH6;P08134;P61586;Q5JR05;Q5JR06;Q5JR07;Q5JR08;U3KQA9;U3KQV3	>tr|C9JNR4|C9JNR4_HUMAN Transforming protein RhoA (Fragment) OS=Homo sapiens GN=RHOA PE=1 SV=1;>tr|C9JRM1|C9JRM1_HUMAN Transforming protein RhoA OS=Homo sapiens GN=RHOA PE=1 SV=1;>tr|C9JX21|C9JX21_HUMAN Transforming protein RhoA OS=Homo sapiens GN=RHOA PE=1 SV=1;>tr|E9PLA2|E9PLA2_HUMAN Rho-related GTP-binding protein RhoC OS=Homo sapiens GN=RHOC PE=4 SV=1;>tr|E9PN11|E9PN11_HUMAN Rho-related GTP-b…	1	1	1	1	1	1	1	1	1	1	1	1	12	88513	24308.9	99568	67665.6	69490.4	63447.5	80628.3	68547.4	122089	79086	89827.5	95104.2		70013.9	70528.4	96526.6	237069		0.725332	0.730663		0.224853	0.0587014
C9JQT8;C9JUV8;E9PRR1;O00478;P78410;S4R3N0	>tr|C9JQT8|C9JQT8_HUMAN Butyrophilin subfamily 3 member A3 (Fragment) OS=Homo sapiens GN=BTN3A3 PE=1 SV=8;>tr|C9JUV8|C9JUV8_HUMAN Butyrophilin subfamily 3 member A3 (Fragment) OS=Homo sapiens GN=BTN3A3 PE=1 SV=1;>tr|E9PRR1|E9PRR1_HUMAN Butyrophilin subfamily 3 member A2 (Fragment) OS=Homo sapiens GN=BTN3A2 PE=1 SV=1;>sp|O00478|BT3A3_HUMAN Butyrophilin subfamily 3 member A3 OS=Homo sapiens GN=BTN3…	1	1	1	1	1	1	1	1	1	1	1	1	12	175530	17943.8	156186	167949	176669	207901	205117	124146	195376	236529	204692	163819		129402	178458	200104	507964		0.646674	0.891827		0.154958	0.413517
C9JRD2;C9JXB9;P25686	>tr|C9JRD2|C9JRD2_HUMAN DnaJ homolog subfamily B member 2 (Fragment) OS=Homo sapiens GN=DNAJB2 PE=1 SV=1;>tr|C9JXB9|C9JXB9_HUMAN DnaJ homolog subfamily B member 2 (Fragment) OS=Homo sapiens GN=DNAJB2 PE=1 SV=1;>sp|P25686|DNJB2_HUMAN DnaJ homolog subfamily B member 2 OS=Homo sapiens GN=DNAJB2 PE=1 SV=3	8	8	8	8	8	8	8	8	8	8	8	8	96	22483.7	116773	82878.2	74793.8	92905	78292.6	87312.3	83147.5	90738.8	79687.6	75144.5	91271.7		74232.2	85414.3	84210.6	243857		0.881506	1.01429		0.648215	0.821369
D6RC06;D6RD60;D6RE99;D6REP8;P49773	>tr|D6RC06|D6RC06_HUMAN Histidine triad nucleotide-binding protein 1 OS=Homo sapiens GN=HINT1 PE=1 SV=1;>tr|D6RD60|D6RD60_HUMAN Histidine triad nucleotide-binding protein 1 OS=Homo sapiens GN=HINT1 PE=1 SV=1;>tr|D6RE99|D6RE99_HUMAN Histidine triad nucleotide-binding protein 1 OS=Homo sapiens GN=HINT1 PE=1 SV=1;>tr|D6REP8|D6REP8_HUMAN Histidine triad nucleotide-binding protein 1 OS=Homo sapiens GN…	1	1	1	1	1	1	1	1	1	1	1	1	12	48862.5	67566	35349.8	40590.7	25662.7	26587.2	26433.9	19571.1	16270.7	13817.3	37997.5	18556.6		48092.2	24563.7	21660.5	94316.5		2.22027	1.13403		0.0274866	0.644996
D6RCF4;Q8N5K1	>tr|D6RCF4|D6RCF4_HUMAN CDGSH iron-sulfur domain-containing protein 2 OS=Homo sapiens GN=CISD2 PE=1 SV=1;>sp|Q8N5K1|CISD2_HUMAN CDGSH iron-sulfur domain-containing protein 2 OS=Homo sapiens GN=CISD2 PE=1 SV=1	1	1	1	1	1	1	1	1	1	1	1	1	12	15640.3	15074.1	13500.6	12553	22541.6	16689.3	18148.6	13436.8	35553.4	20125.3	15224.1	38099		14192	17704.1	27250.5	59146.5		0.520798	0.64968		0.102646	0.19035
D6RF62;P22234	>tr|D6RF62|D6RF62_HUMAN Multifunctional protein ADE2 OS=Homo sapiens GN=PAICS PE=1 SV=1;>sp|P22234|PUR6_HUMAN Multifunctional protein ADE2 OS=Homo sapiens GN=PAICS PE=1 SV=3	4	4	4	4	4	4	4	4	4	4	4	4	48	64251.5	55573.4	129218	51918.9	112178	55045.6	121272	144699	42903.8	63205.9	31412	47264		75240.5	108299	46196.4	229736		1.62871	2.34431		0.211579	0.0406879
E5RJR5;P63208	>tr|E5RJR5|E5RJR5_HUMAN S-phase kinase-associated protein 1 OS=Homo sapiens GN=SKP1 PE=1 SV=1;>sp|P63208|SKP1_HUMAN S-phase kinase-associated protein 1 OS=Homo sapiens GN=SKP1 PE=1 SV=2	5	5	5	5	5	5	5	5	5	5	5	5	60	623620	714497	603561	581159	775118	538464	652293	799649	617472	576821	614271	622983		630709	691381	607887	1.92998e+06		1.03754	1.13735		0.505836	0.26107
E7END7;P62820;Q9H0U4	>tr|E7END7|E7END7_HUMAN Ras-related protein Rab-1A OS=Homo sapiens GN=RAB1A PE=1 SV=1;>sp|P62820|RAB1A_HUMAN Ras-related protein Rab-1A OS=Homo sapiens GN=RAB1A PE=1 SV=3;>sp|Q9H0U4|RAB1B_HUMAN Ras-related protein Rab-1B OS=Homo sapiens GN=RAB1B PE=1 SV=1	4	4	4	4	4	4	4	4	4	4	4	4	48	2.1947e+06	1874346	2.17708e+06	2.00102e+06	2.16826e+06	1.91976e+06	2195900	1.89079e+06	2.19611e+06	2.11682e+06	2.14868e+06	2.69474e+06		2.06179e+06	2.04368e+06	2.28909e+06	6.39455e+06		0.900701	0.892791		0.208543	0.182985
E7ENY0;E7EV99;P35611	>tr|E7ENY0|E7ENY0_HUMAN Alpha-adducin OS=Homo sapiens GN=ADD1 PE=1 SV=1;>tr|E7EV99|E7EV99_HUMAN Alpha-adducin OS=Homo sapiens GN=ADD1 PE=1 SV=1;>sp|P35611|ADDA_HUMAN Alpha-adducin OS=Homo sapiens GN=ADD1 PE=1 SV=2	46	46	46	46	46	46	46	46	46	46	46	46	552	5.29693e+06	4.30879e+06	5030157	5040573	5.83018e+06	4.93555e+06	4.24204e+06	5619478	5.06137e+06	5.05829e+06	5951280	4.94128e+06		4.91911e+06	5.15681e+06	5.25306e+06	1.5329e+07		0.936429	0.981679		0.332299	0.831264
E7EPV7;H6UYS7;P37840	>tr|E7EPV7|E7EPV7_HUMAN Alpha-synuclein OS=Homo sapiens GN=SNCA PE=1 SV=1;>tr|H6UYS7|H6UYS7_HUMAN Alpha-synuclein OS=Homo sapiens GN=SNCA PE=1 SV=1;>sp|P37840|SYUA_HUMAN Alpha-synuclein OS=Homo sapiens GN=SNCA PE=1 SV=1	2	2	2	2	2	2	2	2	2	2	2	2	24	407706	579057	452688	402581	523656	436321	462595	537469	403662	394793	355912	387937		460508	490010	385576	1.33609e+06		1.19434	1.27085		0.164743	0.0160069
E7EQ47;F6XSS0;P18577;Q02161	>tr|E7EQ47|E7EQ47_HUMAN Blood group Rh(CE) polypeptide OS=Homo sapiens GN=RHCE PE=4 SV=1;>tr|F6XSS0|F6XSS0_HUMAN Blood group Rh(CE) polypeptide OS=Homo sapiens GN=RHCE PE=3 SV=1;>sp|P18577|RHCE_HUMAN Blood group Rh(CE) polypeptide OS=Homo sapiens GN=RHCE PE=1 SV=2;>sp|Q02161|RHD_HUMAN Blood group Rh(D) polypeptide OS=Homo sapiens GN=RHD PE=1 SV=3	2	2	2	2	2	2	2	2	2	2	2	2	24	26913.4	24749.4	37020.8	19926.1	26875.8	36300	25240.8	15077	17039.8	18537.6	13306.9	15901.3		27152.4	25873.4	16196.4	69222.2		1.67645	1.59748		0.050322	0.109509
E7EX29;P63104	>tr|E7EX29|E7EX29_HUMAN 14-3-3 protein zeta/delta (Fragment) OS=Homo sapiens GN=YWHAZ PE=1 SV=1;>sp|P63104|1433Z_HUMAN 14-3-3 protein zeta/delta OS=Homo sapiens GN=YWHAZ PE=1 SV=1	5	5	5	5	5	5	5	5	5	5	5	5	60	190431	185894	115691	143155	204187	164693	138134	181704	123510	160877	156571	175819		158793	172180	154194	485167		1.02982	1.11664		0.83541	0.352535
E9PGT1;Q15631	>tr|E9PGT1|E9PGT1_HUMAN Translin OS=Homo sapiens GN=TSN PE=1 SV=1;>sp|Q15631|TSN_HUMAN Translin OS=Homo sapiens GN=TSN PE=1 SV=1	9	9	9	9	9	9	9	9	9	9	9	9	108	91494.4	36133.1	37776	34106	68252.7	30103.4	74668.2	28721.1	127124	87078.2	39529	141286		49877.4	50436.3	98754.2	199068		0.505066	0.510726		0.127556	0.126294
E9PK54	>tr|E9PK54|E9PK54_HUMAN Heat shock cognate 71 kDa protein (Fragment) OS=Homo sapiens GN=HSPA8 PE=1 SV=8	1	1	1	1	1	1	1	1	1	1	1	1	12	83972.1	311575	390732	569347	16170.5	21840.9	296893	27127.8	429326	95338.7	546213	388646		338906	90508.1	364881	794295		0.928814	0.248048		0.857916	0.0634059
E9PKD5;E9PM69;P17980;R4GNH3	>tr|E9PKD5|E9PKD5_HUMAN 26S proteasome regulatory subunit 6A (Fragment) OS=Homo sapiens GN=PSMC3 PE=1 SV=2;>tr|E9PM69|E9PM69_HUMAN 26S proteasome regulatory subunit 6A OS=Homo sapiens GN=PSMC3 PE=1 SV=1;>sp|P17980|PRS6A_HUMAN 26S proteasome regulatory subunit 6A OS=Homo sapiens GN=PSMC3 PE=1 SV=3;>tr|R4GNH3|R4GNH3_HUMAN 26S proteasome regulatory subunit 6A OS=Homo sapiens GN=PSMC3 PE=1 SV=1	6	6	6	6	6	6	6	6	6	6	6	6	72	133694	157966	200052	125061	125955	112016	158923	179487	142093	124994	143898	136225		154193	144095	136802	435091		1.12712	1.05331		0.381884	0.674502
E9PLK3;P55786	>tr|E9PLK3|E9PLK3_HUMAN Aminopeptidase OS=Homo sapiens GN=NPEPPS PE=1 SV=1;>sp|P55786|PSA_HUMAN Puromycin-sensitive aminopeptidase OS=Homo sapiens GN=NPEPPS PE=1 SV=2	19	19	19	19	19	19	19	19	19	19	19	19	228	35112.8	22190.9	59113.9	80252.4	22404.3	100756	73175.3	58785.4	101841	82022.2	87987.4	109275		49167.5	63780.3	95281.3	208229		0.516024	0.669389		0.028704	0.148191
E9PMR6;Q9NZN5	>tr|E9PMR6|E9PMR6_HUMAN Rho guanine nucleotide exchange factor 12 OS=Homo sapiens GN=ARHGEF12 PE=1 SV=1;>sp|Q9NZN5|ARHGC_HUMAN Rho guanine nucleotide exchange factor 12 OS=Homo sapiens GN=ARHGEF12 PE=1 SV=1	1	1	1	1	1	1	1	1	1	1	1	1	12	2.54385e+06	2722380	2413198	2.46866e+06	2.50542e+06	2.22156e+06	2547695	2847321	2.8785e+06	2.449e+06	2.49897e+06	2.48049e+06		2.53702e+06	2.5305e+06	2.57674e+06	7.64426e+06		0.984586	0.982055		0.756408	0.786884
E9PP50;P23528	>tr|E9PP50|E9PP50_HUMAN Cofilin-1 (Fragment) OS=Homo sapiens GN=CFL1 PE=1 SV=8;>sp|P23528|COF1_HUMAN Cofilin-1 OS=Homo sapiens GN=CFL1 PE=1 SV=3	3	3	3	3	3	3	3	3	3	3	3	3	36	150121	223488	129236	207591	163398	115769	147254	160624	131130	132979	109281	154232		177609	146761	131906	456276		1.34648	1.11262		0.134241	0.338938
E9PQ80;E9PQI5;E9PSI1;Q9BY43	>tr|E9PQ80|E9PQ80_HUMAN Charged multivesicular body protein 4a (Fragment) OS=Homo sapiens GN=CHMP4A PE=1 SV=1;>tr|E9PQI5|E9PQI5_HUMAN Charged multivesicular body protein 4a OS=Homo sapiens GN=CHMP4A PE=1 SV=1;>tr|E9PSI1|E9PSI1_HUMAN Transmembrane 9 superfamily member OS=Homo sapiens PE=3 SV=1;>sp|Q9BY43|CHM4A_HUMAN Charged multivesicular body protein 4a OS=Homo sapiens GN=CHMP4A PE=1 SV=3	1	1	1	1	1	1	1	1	1	1	1	1	12	19536.4	35635.9	24265.4	30400.4	17615.8	23793	12877.3	28511.1	33399.7	28363.5	26082.9	27033.2		27459.5	20699.3	28719.8	76878.7		0.956118	0.720733		0.760535	0.0976737
F5GWF6;F8VQ14;P78371	>tr|F5GWF6|F5GWF6_HUMAN T-complex protein 1 subunit beta OS=Homo sapiens GN=CCT2 PE=1 SV=2;>tr|F8VQ14|F8VQ14_HUMAN T-complex protein 1 subunit beta OS=Homo sapiens GN=CCT2 PE=1 SV=1;>sp|P78371|TCPB_HUMAN T-complex protein 1 subunit beta OS=Homo sapiens GN=CCT2 PE=1 SV=4	7	7	7	7	7	7	7	7	7	7	7	7	84	42424.5	31934	49973.3	50220.8	53417.5	64154.1	39712	33188.3	48425.5	46005.5	71119.9	62472.1		43638.1	47618	57005.7	148262		0.765504	0.835319		0.123017	0.344663
F5GX23;F5H5V4;F5H7X1;J3KN29;O00233	>tr|F5GX23|F5GX23_HUMAN 26S proteasome non-ATPase regulatory subunit 9 OS=Homo sapiens GN=PSMD9 PE=1 SV=1;>tr|F5H5V4|F5H5V4_HUMAN 26S proteasome non-ATPase regulatory subunit 9 (Fragment) OS=Homo sapiens GN=PSMD9 PE=1 SV=1;>tr|F5H7X1|F5H7X1_HUMAN 26S proteasome non-ATPase regulatory subunit 9 OS=Homo sapiens GN=PSMD9 PE=1 SV=1;>tr|J3KN29|J3KN29_HUMAN 26S proteasome non-ATPase regulatory subunit 9…	2	2	2	2	2	2	2	2	2	2	2	2	24	171883	191044	153389	153138	180104	153656	149559	185723	178607	149970	160508	129925		167363	167260	154752	489376		1.08149	1.08083		0.390113	0.396175
F5GY55;Q16531	>tr|F5GY55|F5GY55_HUMAN DNA damage-binding protein 1 OS=Homo sapiens GN=DDB1 PE=1 SV=1;>sp|Q16531|DDB1_HUMAN DNA damage-binding protein 1 OS=Homo sapiens GN=DDB1 PE=1 SV=1	4	4	4	4	4	4	4	4	4	4	4	4	48	23259	24549.4	25939.2	18969.2	24716.1	23498.2	22561.4	19651.4	21713.3	23855	18515.7	20363.8		23179.2	22606.8	21112	66898		1.09792	1.0708		0.316875	0.374735
F5H0C8;P09104	>tr|F5H0C8|F5H0C8_HUMAN Gamma-enolase OS=Homo sapiens GN=ENO2 PE=1 SV=1;>sp|P09104|ENOG_HUMAN Gamma-enolase OS=Homo sapiens GN=ENO2 PE=1 SV=3	1	1	1	1	1	1	1	1	1	1	1	1	12	29657.6	65582.2	14693.2	16788.6	67429.7	14407.1	29144	59015	57737.5	55045.5	15793.7	65842.6		31680.4	42499	48604.9	122784		0.651795	0.874377		0.337432	0.727863
F5H2F4;P11586	>tr|F5H2F4|F5H2F4_HUMAN C-1-tetrahydrofolate synthase, cytoplasmic OS=Homo sapiens GN=MTHFD1 PE=1 SV=1;>sp|P11586|C1TC_HUMAN C-1-tetrahydrofolate synthase, cytoplasmic OS=Homo sapiens GN=MTHFD1 PE=1 SV=3	20	20	20	20	20	20	20	20	20	20	20	20	240	189969	192577	123772	163800	184151	136737	187325	198117	188514	168767	170738	196169		167530	176582	181047	525159		0.925338	0.975341		0.478497	0.782114
F5H345;P08397	>tr|F5H345|F5H345_HUMAN Porphobilinogen deaminase OS=Homo sapiens GN=HMBS PE=1 SV=1;>sp|P08397|HEM3_HUMAN Porphobilinogen deaminase OS=Homo sapiens GN=HMBS PE=1 SV=2	6	6	6	6	6	6	6	6	6	6	6	6	72	30588.6	27492.6	24756	19741.6	25411.3	28609.5	24104.3	32978.8	20488.4	31015.2	26838.9	22250		25644.7	27776	25148.1	78568.7		1.01975	1.1045		0.885404	0.428057
F8W1I6;Q13561	>tr|F8W1I6|F8W1I6_HUMAN Dynactin subunit 2 OS=Homo sapiens GN=DCTN2 PE=1 SV=1;>sp|Q13561|DCTN2_HUMAN Dynactin subunit 2 OS=Homo sapiens GN=DCTN2 PE=1 SV=4	6	6	6	6	6	6	6	6	6	6	6	6	72	141608	103854	129047	126438	154926	113718	102612	132772	139756	123547	122800	138788		125237	126007	131223	382467		0.954385	0.960253		0.541914	0.695484
F8W914;Q9NQC3	>tr|F8W914|F8W914_HUMAN Reticulon OS=Homo sapiens GN=RTN4 PE=1 SV=1;>sp|Q9NQC3|RTN4_HUMAN Reticulon-4 OS=Homo sapiens GN=RTN4 PE=1 SV=2	2	2	2	2	2	2	2	2	2	2	2	2	24	19795.4	181912	145809	14656.1	72347.4	16503.5	138339	20498.3	23166.9	132831	18091.8	204450		90543.2	61921.9	94634.7	247100		0.956765	0.654326		0.949816	0.566593
F8WBH7;O95456	>tr|F8WBH7|F8WBH7_HUMAN Proteasome assembly chaperone 1 OS=Homo sapiens GN=PSMG1 PE=1 SV=1;>sp|O95456|PSMG1_HUMAN Proteasome assembly chaperone 1 OS=Homo sapiens GN=PSMG1 PE=1 SV=1	1	1	1	1	1	1	1	1	1	1	1	1	12	33601	17881.2	36587.2	41558.5	39046.2	39691.3	38101.3	40425.7	30887.4	29532.2	33566.4	28823.7		32407	39316.1	30702.4	102426		1.05552	1.28055		0.763857	0.00133616
G3V180;G3V1D3;Q9NY33	>tr|G3V180|G3V180_HUMAN Dipeptidyl peptidase 3 OS=Homo sapiens GN=DPP3 PE=1 SV=1;>tr|G3V1D3|G3V1D3_HUMAN Dipeptidyl peptidase 3 OS=Homo sapiens GN=DPP3 PE=1 SV=1;>sp|Q9NY33|DPP3_HUMAN Dipeptidyl peptidase 3 OS=Homo sapiens GN=DPP3 PE=1 SV=2	16	16	16	16	16	16	16	16	16	16	16	16	192	28243.4	27887.7	43524.6	32639.4	22868.3	28937.7	25491.2	30565.9	27041.9	36271.8	28644.8	40197.3		33073.8	26965.8	33039	93078.5		1.00105	0.816181		0.994453	0.15348
G3V1N2	>tr|G3V1N2|G3V1N2_HUMAN HCG1745306, isoform CRA_a OS=Homo sapiens GN=HBA2 PE=1 SV=1	1	1	1	1	1	1	1	1	1	1	1	1	12	31980012	42964920	31942842	32913724	40321048	34025844	30655388	33104836	35748188	33611652	25470586	29380620		3.49504e+07	34526779	3.10528e+07	100529915		1.12552	1.11187		0.311775	0.301989
G3V5Z7;P60900	>tr|G3V5Z7|G3V5Z7_HUMAN Proteasome subunit alpha type OS=Homo sapiens GN=PSMA6 PE=1 SV=1;>sp|P60900|PSA6_HUMAN Proteasome subunit alpha type-6 OS=Homo sapiens GN=PSMA6 PE=1 SV=1	8	8	8	8	8	8	8	8	8	8	8	8	96	250874	273890	265794	260299	261568	277516	281255	290762	266897	276255	269727	294949		262714	277775	276957	817446		0.948575	1.00295		0.126656	0.928628
G5E977;Q6XQN6	>tr|G5E977|G5E977_HUMAN Nicotinate phosphoribosyltransferase OS=Homo sapiens GN=NAPRT PE=1 SV=1;>sp|Q6XQN6|PNCB_HUMAN Nicotinate phosphoribosyltransferase OS=Homo sapiens GN=NAPRT PE=1 SV=2	7	7	7	7	7	7	7	7	7	7	7	7	84	36944.3	46867.6	89360.6	54827.9	28470.3	45401.7	24382.9	82331.2	61547.1	67613.5	75984.4	44929.7		57000.1	45146.5	62518.6	164665		0.911729	0.722129		0.692819	0.298558
H0Y4J6;P00568;Q5T9B7	>tr|H0Y4J6|H0Y4J6_HUMAN Adenylate kinase isoenzyme 1 (Fragment) OS=Homo sapiens GN=AK1 PE=1 SV=1;>sp|P00568|KAD1_HUMAN Adenylate kinase isoenzyme 1 OS=Homo sapiens GN=AK1 PE=1 SV=3;>tr|Q5T9B7|Q5T9B7_HUMAN Adenylate kinase isoenzyme 1 OS=Homo sapiens GN=AK1 PE=1 SV=1	3	3	3	3	3	3	3	3	3	3	3	3	36	521664	618358	427507	32843.9	448417	36384.6	36679.5	34763.3	35461.7	489131	37493.8	549403		400093	139061	277872	817027		1.43984	0.500449		0.543889	0.457485
H0Y7A7;P0DP23;P0DP24;P0DP25	>tr|H0Y7A7|H0Y7A7_HUMAN Calmodulin-2 (Fragment) OS=Homo sapiens GN=CALM2 PE=1 SV=1;>sp|P0DP23|CALM1_HUMAN Calmodulin-1 OS=Homo sapiens GN=CALM1 PE=1 SV=1;>sp|P0DP24|CALM2_HUMAN Calmodulin-2 OS=Homo sapiens GN=CALM2 PE=1 SV=1;>sp|P0DP25|CALM3_HUMAN Calmodulin-3 OS=Homo sapiens GN=CALM3 PE=1 SV=1	8	8	8	8	8	8	8	8	8	8	8	8	96	1.57565e+06	1.91946e+06	1.60477e+06	1353814	1.79256e+06	1.41649e+06	1.43591e+06	1.51433e+06	1.6624e+06	1.41038e+06	1.43303e+06	1581852		1.61342e+06	1.53982e+06	1.52191e+06	4.67516e+06		1.06013	1.01177		0.519526	0.871759
H0YA55;P02768	>tr|H0YA55|H0YA55_HUMAN Serum albumin (Fragment) OS=Homo sapiens GN=ALB PE=1 SV=1;>sp|P02768|ALBU_HUMAN Serum albumin OS=Homo sapiens GN=ALB PE=1 SV=2	16	16	16	16	16	16	16	16	16	16	16	16	192	2.38271e+06	3315884	2.44894e+06	2.18127e+06	3.19861e+06	2.23697e+06	2379815	3.09735e+06	3229181	2242151	2.69865e+06	3.2192e+06		2.5822e+06	2.72819e+06	2.8473e+06	8.15769e+06		0.906896	0.958168		0.471612	0.738577
H0YC04;P21281	>tr|H0YC04|H0YC04_HUMAN V-type proton ATPase subunit B, brain isoform (Fragment) OS=Homo sapiens GN=ATP6V1B2 PE=1 SV=1;>sp|P21281|VATB2_HUMAN V-type proton ATPase subunit B, brain isoform OS=Homo sapiens GN=ATP6V1B2 PE=1 SV=3	1	1	1	1	1	1	1	1	1	1	1	1	12	23938.9	12798.8	19273.6	17723.9	26548.9	43189.3	37529	16950.3	19157	35873.4	14960.3	62776.6		18433.8	31054.4	33191.8	82680		0.555371	0.935603		0.268396	0.869592
H0YH81;P06576	>tr|H0YH81|H0YH81_HUMAN ATP synthase subunit beta (Fragment) OS=Homo sapiens GN=ATP5B PE=1 SV=1;>sp|P06576|ATPB_HUMAN ATP synthase subunit beta, mitochondrial OS=Homo sapiens GN=ATP5B PE=1 SV=3	3	3	3	3	3	3	3	3	3	3	3	3	36	224558	215073	313110	74247.7	187226	168679	254400	377992	319049	281792	249965	288525		206747	247074	284833	738654		0.725855	0.867436		0.213192	0.492817
H0YK48	>tr|H0YK48|H0YK48_HUMAN Tropomyosin alpha-1 chain OS=Homo sapiens GN=TPM1 PE=1 SV=1	2	2	2	2	2	2	2	2	2	2	2	2	24	466754	466539	394885	75110.9	359791	62258	59126.2	102346	18166	361488	388995	92605.5		350822	145880	215314	712016		1.62936	0.677525		0.345444	0.579687
H0YL69;H0YMZ1;P25789	>tr|H0YL69|H0YL69_HUMAN Proteasome subunit alpha type (Fragment) OS=Homo sapiens GN=PSMA4 PE=1 SV=1;>tr|H0YMZ1|H0YMZ1_HUMAN Proteasome subunit alpha type (Fragment) OS=Homo sapiens GN=PSMA4 PE=1 SV=8;>sp|P25789|PSA4_HUMAN Proteasome subunit alpha type-4 OS=Homo sapiens GN=PSMA4 PE=1 SV=1	7	7	7	7	7	7	7	7	7	7	7	7	84	741547	618882	796025	601813	679143	633379	733110	641488	566017	652811	778974	657223		689567	671780	663756	2.0251e+06		1.03889	1.01209		0.702412	0.877814
H3BPK3;Q16775	>tr|H3BPK3|H3BPK3_HUMAN Hydroxyacylglutathione hydrolase, mitochondrial (Fragment) OS=Homo sapiens GN=HAGH PE=1 SV=1;>sp|Q16775|GLO2_HUMAN Hydroxyacylglutathione hydrolase, mitochondrial OS=Homo sapiens GN=HAGH PE=1 SV=2	8	8	8	8	8	8	8	8	8	8	8	8	96	1.37266e+06	1.81017e+06	1.49043e+06	1.45394e+06	1414257	1.70447e+06	1.90351e+06	1.7073e+06	1.72896e+06	1.26402e+06	1.50451e+06	1.80725e+06		1.5318e+06	1.68238e+06	1.57619e+06	4.79037e+06		0.97184	1.06738		0.785337	0.528483
H3BTE6;P16452	>tr|H3BTE6|H3BTE6_HUMAN Erythrocyte membrane protein band 4.2 (Fragment) OS=Homo sapiens GN=EPB42 PE=1 SV=1;>sp|P16452|EPB42_HUMAN Erythrocyte membrane protein band 4.2 OS=Homo sapiens GN=EPB42 PE=1 SV=3	5	5	5	5	5	5	5	5	5	5	5	5	60	23477.7	20042.7	22956.2	21679.7	28418.6	16608.5	21253.2	17697.7	16925.6	30872.2	24601.4	15385		22039.1	20994.5	21946.1	64979.6		1.00424	0.956641		0.981275	0.839209
H7BYY1	>tr|H7BYY1|H7BYY1_HUMAN Tropomyosin 1 (Alpha), isoform CRA_m OS=Homo sapiens GN=TPM1 PE=1 SV=1	51	51	51	51	51	51	51	51	51	51	51	51	612	12082544	20529464	17420546	14105382	23874704	12891719	9380437	23570022	12168871	11375379	15076801	11232422		16034484	1.74292e+07	1.24634e+07	4.59271e+07		1.28653	1.39844		0.153186	0.274865
H7BZ94;P07237	>tr|H7BZ94|H7BZ94_HUMAN Protein disulfide-isomerase OS=Homo sapiens GN=P4HB PE=1 SV=2;>sp|P07237|PDIA1_HUMAN Protein disulfide-isomerase OS=Homo sapiens GN=P4HB PE=1 SV=3	5	5	5	5	5	5	5	5	5	5	5	5	60	128200	153107	135353	131211	141558	146085	139825	150340	145897	100318	127222	44673.8		136968	144452	104528	385947		1.31035	1.38195		0.238941	0.167353
H7BZJ3	>tr|H7BZJ3|H7BZJ3_HUMAN Protein disulfide-isomerase A3 (Fragment) OS=Homo sapiens GN=PDIA3 PE=1 SV=1	2	2	2	2	2	2	2	2	2	2	2	2	24	117967	38840	41686	50204.2	100226	79108	33273.2	47529.1	34717.5	21428.1	19705.2	35821.1		62174.2	65034.1	27917.9	155126		2.22703	2.32947		0.164257	0.0876143
I3L0N3;P46459	>tr|I3L0N3|I3L0N3_HUMAN Vesicle-fusing ATPase OS=Homo sapiens GN=NSF PE=1 SV=1;>sp|P46459|NSF_HUMAN Vesicle-fusing ATPase OS=Homo sapiens GN=NSF PE=1 SV=3	17	17	17	17	17	17	17	17	17	17	17	17	204	604729	885541	911070	947378	676491	96514.2	561059	850343	917383	645823	695989	835187		837179	546102	773595	2.15688e+06		1.08219	0.705927		0.550762	0.2606
I3L3E9;P39748	>tr|I3L3E9|I3L3E9_HUMAN Flap endonuclease 1 (Fragment) OS=Homo sapiens GN=FEN1 PE=1 SV=1;>sp|P39748|FEN1_HUMAN Flap endonuclease 1 OS=Homo sapiens GN=FEN1 PE=1 SV=1	1	1	1	1	1	1	1	1	1	1	1	1	12	31059.6	257065	54580.1	159273	37022.9	187954	24222	232353	185926	172055	20318.9	17003.8		125494	120388	98826.1	344708		1.26985	1.21818		0.715146	0.769214
J3KNE3;P68402	>tr|J3KNE3|J3KNE3_HUMAN Platelet-activating factor acetylhydrolase IB subunit beta (Fragment) OS=Homo sapiens GN=PAFAH1B2 PE=1 SV=1;>sp|P68402|PA1B2_HUMAN Platelet-activating factor acetylhydrolase IB subunit beta OS=Homo sapiens GN=PAFAH1B2 PE=1 SV=1	1	1	1	1	1	1	1	1	1	1	1	1	12	91251.3	16612	51128.9	106622	120241	113803	116130	109295	77725.7	90832.5	124383	115587		66403.6	114867	102132	283403		0.650175	1.12469		0.186396	0.325952
J3KNF4;O14618	>tr|J3KNF4|J3KNF4_HUMAN Copper chaperone for superoxide dismutase OS=Homo sapiens GN=CCS PE=1 SV=1;>sp|O14618|CCS_HUMAN Copper chaperone for superoxide dismutase OS=Homo sapiens GN=CCS PE=1 SV=1	7	7	7	7	7	7	7	7	7	7	7	7	84	130209	152971	209000	189243	162134	129019	156863	157469	206201	121456	132657	178702		170356	151371	159754	481481		1.06636	0.947526		0.704037	0.713625
J3KPS3;P04075	>tr|J3KPS3|J3KPS3_HUMAN Fructose-bisphosphate aldolase OS=Homo sapiens GN=ALDOA PE=1 SV=1;>sp|P04075|ALDOA_HUMAN Fructose-bisphosphate aldolase A OS=Homo sapiens GN=ALDOA PE=1 SV=2	10	10	10	10	10	10	10	10	10	10	10	10	120	125822	160346	118309	105662	162394	112250	134610	143641	121514	116949	114212	126358		127535	138224	119758	385517		1.06494	1.15419		0.559149	0.173654
J3KQS5	>tr|J3KQS5|J3KQS5_HUMAN Pleckstrin homology domain-containing family A member 8 (Fragment) OS=Homo sapiens GN=PLEKHA8 PE=1 SV=1	1	1	1	1	1	1	1	1	1	1	1	1	12	241291	143503	253629	217836	235127	208009	163581	229720	233770	253893	190050	258843		214065	209109	234139	657313		0.914264	0.893099		0.522144	0.310225
J3KT12;J3KTB5;P60842	>tr|J3KT12|J3KT12_HUMAN Eukaryotic initiation factor 4A-I OS=Homo sapiens GN=EIF4A1 PE=1 SV=1;>tr|J3KTB5|J3KTB5_HUMAN Eukaryotic initiation factor 4A-I (Fragment) OS=Homo sapiens GN=EIF4A1 PE=1 SV=1;>sp|P60842|IF4A1_HUMAN Eukaryotic initiation factor 4A-I OS=Homo sapiens GN=EIF4A1 PE=1 SV=1	3	3	3	3	3	3	3	3	3	3	3	3	36	149077	115500	29174.9	135168	18734.4	26083.6	27139.4	94313.2	141246	175563	168300	34320.4		107230	41567.7	129858	278655		0.825752	0.320102		0.612983	0.0677513
K7EIJ8;K7EM02;Q8IYT4	>tr|K7EIJ8|K7EIJ8_HUMAN Katanin p60 ATPase-containing subunit A-like 2 (Fragment) OS=Homo sapiens GN=KATNAL2 PE=1 SV=1;>tr|K7EM02|K7EM02_HUMAN Katanin p60 ATPase-containing subunit A-like 2 (Fragment) OS=Homo sapiens GN=KATNAL2 PE=1 SV=1;>sp|Q8IYT4|KATL2_HUMAN Katanin p60 ATPase-containing subunit A-like 2 OS=Homo sapiens GN=KATNAL2 PE=1 SV=3	1	1	1	1	1	1	1	1	1	1	1	1	12	651277	718575	701714	653898	723174	678152	715188	790728	641128	699451	596376	657716		681366	726810	648667	2.05684e+06		1.05041	1.12047		0.277529	0.0491101
K7EP46;P52888	>tr|K7EP46|K7EP46_HUMAN Thimet oligopeptidase OS=Homo sapiens GN=THOP1 PE=1 SV=1;>sp|P52888|THOP1_HUMAN Thimet oligopeptidase OS=Homo sapiens GN=THOP1 PE=1 SV=2	1	1	1	1	1	1	1	1	1	1	1	1	12	36229.8	55835.8	25849.9	438671	392444	31203.8	145202	29545.5	324080	48635.5	389380	29232.1		139147	149599	197832	486577		0.703357	0.756191		0.682216	0.715308
K7EPE6	>tr|K7EPE6|K7EPE6_HUMAN NACHT, LRR and PYD domains-containing protein 2 (Fragment) OS=Homo sapiens GN=NLRP2 PE=1 SV=1	1	1	1	1	1	1	1	1	1	1	1	1	12	60044.2	42004.2	18705.1	16380.1	52770.4	18004.4	36178.9	33570	13589.5	37436.2	35595.9	58338		34283.4	35130.9	36239.9	105654		0.946012	0.969398		0.892068	0.927051
K7ER96;O43396	>tr|K7ER96|K7ER96_HUMAN Thioredoxin-like protein 1 (Fragment) OS=Homo sapiens GN=TXNL1 PE=1 SV=1;>sp|O43396|TXNL1_HUMAN Thioredoxin-like protein 1 OS=Homo sapiens GN=TXNL1 PE=1 SV=3	4	4	4	4	4	4	4	4	4	4	4	4	48	32194.5	32387.8	62273.7	37912	31554.3	37084.7	31269.8	58367.4	89033.3	73533.7	36570.4	28358.2		41192	39569	56873.9	137635		0.724269	0.695733		0.3836	0.335652
K7ES11;Q9C0C9	>tr|K7ES11|K7ES11_HUMAN (E3-independent) E2 ubiquitin-conjugating enzyme (Fragment) OS=Homo sapiens GN=UBE2O PE=1 SV=1;>sp|Q9C0C9|UBE2O_HUMAN (E3-independent) E2 ubiquitin-conjugating enzyme OS=Homo sapiens GN=UBE2O PE=1 SV=3	2	2	2	2	2	2	2	2	2	2	2	2	24	86668.5	162409	94690	76134.2	171772	79954.7	202107	99968.3	87559.1	199363	74582.7	241067		104975	138451	150643	394069		0.696849	0.919064		0.369169	0.81749
K7ESE8;Q13867	>tr|K7ESE8|K7ESE8_HUMAN Bleomycin hydrolase (Fragment) OS=Homo sapiens GN=BLMH PE=1 SV=1;>sp|Q13867|BLMH_HUMAN Bleomycin hydrolase OS=Homo sapiens GN=BLMH PE=1 SV=1	4	4	4	4	4	4	4	4	4	4	4	4	48	1.42785e+06	1.24248e+06	1.50485e+06	1.33141e+06	1.5291e+06	1.26262e+06	1.43682e+06	1.64155e+06	1.17366e+06	1.34602e+06	1.38077e+06	1.32329e+06		1.37665e+06	1.46752e+06	1.30594e+06	4.15011e+06		1.05415	1.12373		0.372427	0.142977
M0R165;Q9UBC2	>tr|M0R165|M0R165_HUMAN Epidermal growth factor receptor substrate 15-like 1 OS=Homo sapiens GN=EPS15L1 PE=1 SV=1;>sp|Q9UBC2|EP15R_HUMAN Epidermal growth factor receptor substrate 15-like 1 OS=Homo sapiens GN=EPS15L1 PE=1 SV=1	7	7	7	7	7	7	7	7	7	7	7	7	84	55182.5	89657.6	54800.7	57006.9	80263.2	50641.4	57943.2	61286.5	67479.2	51934.1	59000.8	70608.8		64161.9	62533.6	62255.7	188951		1.03062	1.00446		0.849967	0.972177
O00231	>sp|O00231|PSD11_HUMAN 26S proteasome non-ATPase regulatory subunit 11 OS=Homo sapiens GN=PSMD11 PE=1 SV=3	20	20	20	20	20	20	20	20	20	20	20	20	240	92996.1	131898	45340.9	83057.2	47920.9	69229.2	47586.3	42603.7	39060.1	79788.8	55646.5	21522		88323	51835	49004.4	189162		1.80235	1.05776		0.125581	0.846223
O00232	>sp|O00232|PSD12_HUMAN 26S proteasome non-ATPase regulatory subunit 12 OS=Homo sapiens GN=PSMD12 PE=1 SV=3	6	6	6	6	6	6	6	6	6	6	6	6	72	24681.5	28521.3	61031.1	63794.1	21619.6	30401.7	27966	21430.3	22213.5	22153.3	20962.5	21730.9		44507	25354.4	21765	91626.5		2.04489	1.16492		0.11617	0.211395
O00487	>sp|O00487|PSDE_HUMAN 26S proteasome non-ATPase regulatory subunit 14 OS=Homo sapiens GN=PSMD14 PE=1 SV=1	4	4	4	4	4	4	4	4	4	4	4	4	48	18347.1	14353.8	13324.4	15803.8	33886.1	17526.8	14074.4	15267.3	25826.4	14702.6	16777.9	21942.6		15457.3	20188.6	19812.4	55458.3		0.780184	1.01899		0.186011	0.945982
O00743	>sp|O00743|PPP6_HUMAN Serine/threonine-protein phosphatase 6 catalytic subunit OS=Homo sapiens GN=PPP6C PE=1 SV=1	2	2	2	2	2	2	2	2	2	2	2	2	24	37822.4	11760.1	27972.9	21311.1	20307.3	27428.3	15705.2	22648.5	24614.7	15101.6	16973.6	24910.1		24716.6	21522.3	20400	66638.9		1.2116	1.05501		0.513136	0.761216
O14818	>sp|O14818|PSA7_HUMAN Proteasome subunit alpha type-7 OS=Homo sapiens GN=PSMA7 PE=1 SV=1	14	14	14	14	14	14	14	14	14	14	14	14	168	311514	287956	226653	289682	285552	292856	323792	261183	363845	324594	322286	459354		278951	290846	367520	937317		0.75901	0.791374		0.0641129	0.0916711
O14980	>sp|O14980|XPO1_HUMAN Exportin-1 OS=Homo sapiens GN=XPO1 PE=1 SV=1	20	20	20	20	20	20	20	20	20	20	20	20	240	36939.9	25991.4	43829.5	42625	27435.7	54248.4	42069.1	52112.2	33906.7	48601.8	58718.7	45483.9		37346.4	43966.4	46677.8	127991		0.80009	0.941912		0.205499	0.745638
O15165	>sp|O15165|LRAD4_HUMAN Low-density lipoprotein receptor class A domain-containing protein 4 OS=Homo sapiens GN=LDLRAD4 PE=1 SV=1	1	1	1	1	1	1	1	1	1	1	1	1	12	3.41073e+06	3.91419e+06	3453190	2.88501e+06	3.60738e+06	2.75967e+06	3.14272e+06	3655524	3.21556e+06	2.7909e+06	2.76736e+06	3.14902e+06		3.41578e+06	3.29132e+06	2.98071e+06	9.68781e+06		1.14596	1.10421		0.134515	0.258993
O15400	>sp|O15400|STX7_HUMAN Syntaxin-7 OS=Homo sapiens GN=STX7 PE=1 SV=4	6	6	6	6	6	6	6	6	6	6	6	6	72	116742	165971	112856	115925	145544	119322	120349	151858	104085	112211	105410	91507.3		127874	134268	103303	365445		1.23785	1.29975		0.147676	0.0262038
O43765	>sp|O43765|SGTA_HUMAN Small glutamine-rich tetratricopeptide repeat-containing protein alpha OS=Homo sapiens GN=SGTA PE=1 SV=1	6	6	6	6	6	6	6	6	6	6	6	6	72	119873	108698	82299.4	85544.9	99877.8	76024.8	87543.8	115820	140509	99382	98147.1	95081		99103.9	94816.6	108280	302200		0.915259	0.875664		0.539867	0.367116
O60814;P06899;P23527;P33778;P57053;P58876;P62807;Q16778;Q5QNW6;Q93079;Q99877;Q99879;Q99880;U3KQK0	>sp|O60814|H2B1K_HUMAN Histone H2B type 1-K OS=Homo sapiens GN=HIST1H2BK PE=1 SV=3;>sp|P06899|H2B1J_HUMAN Histone H2B type 1-J OS=Homo sapiens GN=HIST1H2BJ PE=1 SV=3;>sp|P23527|H2B1O_HUMAN Histone H2B type 1-O OS=Homo sapiens GN=HIST1H2BO PE=1 SV=3;>sp|P33778|H2B1B_HUMAN Histone H2B type 1-B OS=Homo sapiens GN=HIST1H2BB PE=1 SV=2;>sp|P57053|H2BFS_HUMAN Histone H2B type F-S OS=Homo sapiens GN=H2BF…	7	7	7	7	7	7	7	7	7	7	7	7	84	23813.2	31593.3	24886.7	34700.1	57267.1	35463.4	39874.3	31892.7	40907.7	50189.2	29810	42046.3		28748.3	41124.4	40738.3	110611		0.705683	1.00948		0.0592903	0.958015
O75368	>sp|O75368|SH3L1_HUMAN SH3 domain-binding glutamic acid-rich-like protein OS=Homo sapiens GN=SH3BGRL PE=1 SV=1	7	7	7	7	7	7	7	7	7	7	7	7	84	61860.8	74545.8	74897.3	81684.2	73616.5	64158	76542.7	101934	86218.8	74864.6	56849.2	82492		73247	79062.8	75106.2	227416		0.975247	1.05268		0.819306	0.716728
O75695	>sp|O75695|XRP2_HUMAN Protein XRP2 OS=Homo sapiens GN=RP2 PE=1 SV=4	2	2	2	2	2	2	2	2	2	2	2	2	24	124969	46739.4	117464	48329	50905.9	45236.8	117374	113299	77973.1	134984	113853	91524.6		84375.2	81703.9	104584	270663		0.806771	0.781229		0.452299	0.367555
O76003	>sp|O76003|GLRX3_HUMAN Glutaredoxin-3 OS=Homo sapiens GN=GLRX3 PE=1 SV=2	9	9	9	9	9	9	9	9	9	9	9	9	108	40431.1	57652.6	32229.7	48467	41779.4	39833.9	49953.6	64780.8	54391.4	41599	44546	36074.6		44695.1	49086.9	44152.8	137935		1.01228	1.11175		0.938047	0.501917
O95294	>sp|O95294|RASL1_HUMAN RasGAP-activating-like protein 1 OS=Homo sapiens GN=RASAL1 PE=1 SV=3	1	1	1	1	1	1	1	1	1	1	1	1	12	1.2738e+06	1.53095e+06	1.47084e+06	1.32397e+06	1.5245e+06	1.26435e+06	1.26392e+06	1.59704e+06	1.20112e+06	1.15703e+06	1.14685e+06	1177186		1.39989e+06	1.41245e+06	1.17055e+06	3.98289e+06		1.19593	1.20666		0.0296905	0.067417
O95747	>sp|O95747|OXSR1_HUMAN Serine/threonine-protein kinase OSR1 OS=Homo sapiens GN=OXSR1 PE=1 SV=1	12	12	12	12	12	12	12	12	12	12	12	12	144	267521	309427	280360	262740	313347	239173	257429	293712	252225	213792	213441	287188		280012	275915	241662	797589		1.1587	1.14174		0.122748	0.21069
P00338	>sp|P00338|LDHA_HUMAN L-lactate dehydrogenase A chain OS=Homo sapiens GN=LDHA PE=1 SV=2	16	16	16	16	16	16	16	16	16	16	16	16	192	452493	411352	315220	336586	427250	356072	331164	475077	431339	413329	399641	487793		378913	397391	433026	1.20933e+06		0.875036	0.917708		0.208708	0.395109
P00352	>sp|P00352|AL1A1_HUMAN Retinal dehydrogenase 1 OS=Homo sapiens GN=ALDH1A1 PE=1 SV=2	30	30	30	30	30	30	30	30	30	30	30	30	360	784991	963584	819891	728011	1047870	870419	895727	867772	1.04376e+06	748569	831304	1.03487e+06		824119	920447	914627	2.65919e+06		0.901045	1.00636		0.355433	0.948476
P00390	>sp|P00390|GSHR_HUMAN Glutathione reductase, mitochondrial OS=Homo sapiens GN=GSR PE=1 SV=2	13	13	13	13	13	13	13	13	13	13	13	13	156	1.62538e+06	2.05567e+06	1.76419e+06	1.52511e+06	2.05729e+06	1.59983e+06	1774513	1922837	1.78597e+06	1.63967e+06	1.5505e+06	1744130		1.74259e+06	1.83862e+06	1.68007e+06	5.26127e+06		1.03721	1.09437		0.646824	0.219805
P00441	>sp|P00441|SODC_HUMAN Superoxide dismutase [Cu-Zn] OS=Homo sapiens GN=SOD1 PE=1 SV=2	15	15	15	15	15	15	15	15	15	15	15	15	180	15577545	20608872	10796443	10697330	15415831	10429569	16789932	14857596	18061028	10454878	14003788	17350438		1.442e+07	14373232	14967533	4.37608e+07		0.963422	0.960294		0.858542	0.798555
P00491	>sp|P00491|PNPH_HUMAN Purine nucleoside phosphorylase OS=Homo sapiens GN=PNP PE=1 SV=2	21	21	21	21	21	21	21	21	21	21	21	21	252	446876	451738	422968	453161	440379	373566	440050	521347	513305	442603	475995	510468		443686	443835	485593	1.37311e+06		0.913699	0.914007		0.0806641	0.284098
P00492	>sp|P00492|HPRT_HUMAN Hypoxanthine-guanine phosphoribosyltransferase OS=Homo sapiens GN=HPRT1 PE=1 SV=2	12	12	12	12	12	12	12	12	12	12	12	12	144	1.16719e+06	1.35181e+06	1.1438e+06	1173176	1.04302e+06	1143048	1.44356e+06	1.48839e+06	1.17859e+06	1.31751e+06	1.24845e+06	833250		1.209e+06	1.2795e+06	1.14445e+06	3.63295e+06		1.0564	1.11801		0.611798	0.413679
P00558	>sp|P00558|PGK1_HUMAN Phosphoglycerate kinase 1 OS=Homo sapiens GN=PGK1 PE=1 SV=3	27	27	27	27	27	27	27	27	27	27	27	27	324	32501.1	21543.8	17618.5	15005.9	24252.6	22245.5	22140.1	18206.9	24974.5	23025	27142.9	27065.9		21667.3	21711.3	25552.1	68930.7		0.847967	0.849686		0.393046	0.0559131
P00915	>sp|P00915|CAH1_HUMAN Carbonic anhydrase 1 OS=Homo sapiens GN=CA1 PE=1 SV=2	38	38	38	38	38	38	38	38	38	38	38	38	456	2646921	1.81764e+06	2.62687e+06	2.83912e+06	1.9233e+06	3.12964e+06	2.64752e+06	2.00058e+06	2.84119e+06	2.56094e+06	3.12691e+06	2841133		2.48264e+06	2.42526e+06	2.84254e+06	7.75044e+06		0.873387	0.853202		0.223189	0.247607
P00918	>sp|P00918|CAH2_HUMAN Carbonic anhydrase 2 OS=Homo sapiens GN=CA2 PE=1 SV=2	15	15	15	15	15	15	15	15	15	15	15	15	180	245156	48039.2	104413	262757	53012.9	86561.7	258219	63743.9	226614	269709	259954	200488		165091	115384	239191	519667		0.690207	0.482393		0.257951	0.0771459
P02042	>sp|P02042|HBD_HUMAN Hemoglobin subunit delta OS=Homo sapiens GN=HBD PE=1 SV=2	27	27	27	27	27	27	27	27	27	27	27	27	324	926206976	1161060224	1118483712	927847936	1244993408	819076864	982378624	1077143168	914878592	1088565760	891202048	1043979520		1033399712	1030898016	984656480	3048954208		1.0495	1.04696		0.559173	0.668664
P02538;P48668	>sp|P02538|K2C6A_HUMAN Keratin, type II cytoskeletal 6A OS=Homo sapiens GN=KRT6A PE=1 SV=3;>sp|P48668|K2C6C_HUMAN Keratin, type II cytoskeletal 6C OS=Homo sapiens GN=KRT6C PE=1 SV=3	1	1	1	1	1	1	1	1	1	1	1	1	12	14216.4	55135.3	17657.6	19201.5	72664.2	17313.8	17696.3	13101.9	34667.4	20639.7	14844.7	37149.5		26552.7	30194.1	26825.3	83572.1		0.989837	1.12558		0.981239	0.835724
P02549	>sp|P02549|SPTA1_HUMAN Spectrin alpha chain, erythrocytic 1 OS=Homo sapiens GN=SPTA1 PE=1 SV=5	429	429	429	429	429	429	429	429	429	429	429	429	5148	3.01486e+06	3.63581e+06	3.02221e+06	2832152	3.73176e+06	3052346	3.31729e+06	3.73074e+06	3.16193e+06	2666698	2849597	3.12957e+06		3.12626e+06	3.45804e+06	2.95195e+06	9.53624e+06		1.05905	1.17144		0.445649	0.0524388
P02730	>sp|P02730|B3AT_HUMAN Band 3 anion transport protein OS=Homo sapiens GN=SLC4A1 PE=1 SV=3	76	76	76	76	76	76	76	76	76	76	76	76	912	1.0107e+06	646158	1186756	1.16642e+06	783185	1.13321e+06	849561	828717	892184	1.06869e+06	980725	816938		1.00251e+06	898667	939633	2.84081e+06		1.06691	0.956402		0.668403	0.687246
P04040	>sp|P04040|CATA_HUMAN Catalase OS=Homo sapiens GN=CAT PE=1 SV=3	38	38	38	38	38	38	38	38	38	38	38	38	456	20955568	21831976	20513634	21328468	23467678	20412706	20997264	24206470	20678396	20417756	20716500	19587606		2.11574e+07	2.2271e+07	2.03501e+07	6.37785e+07		1.03967	1.0944		0.0802573	0.126703
P04259	>sp|P04259|K2C6B_HUMAN Keratin, type II cytoskeletal 6B OS=Homo sapiens GN=KRT6B PE=1 SV=5	3	3	3	3	3	3	3	3	3	3	3	3	36	33232.2	772458	952788	826668	4403784	798940	236423	941255	222080	1.4434e+06	282963	84890		646287	1.5951e+06	508333	2.74972e+06		1.27138	3.1379		0.728766	0.343308
P04264	>sp|P04264|K2C1_HUMAN Keratin, type II cytoskeletal 1 OS=Homo sapiens GN=KRT1 PE=1 SV=6	21	21	21	21	21	21	21	21	21	21	21	21	252	298788	2.3899e+06	1.4678e+06	992629	5.04447e+06	976148	225388	1.81937e+06	809538	3.20302e+06	623000	231532		1.28728e+06	2.01634e+06	1.21677e+06	4.5204e+06		1.05795	1.65712		0.933374	0.551987
P04350;P68371	>sp|P04350|TBB4A_HUMAN Tubulin beta-4A chain OS=Homo sapiens GN=TUBB4A PE=1 SV=2;>sp|P68371|TBB4B_HUMAN Tubulin beta-4B chain OS=Homo sapiens GN=TUBB4B PE=1 SV=1	8	8	8	8	8	8	8	8	8	8	8	8	96	133508	107872	133700	133988	105368	132382	116808	79806.7	116471	172724	124372	1.15699e+06		127267	108591	392638	628497		0.324134	0.276568		0.374708	0.346778
P04406	>sp|P04406|G3P_HUMAN Glyceraldehyde-3-phosphate dehydrogenase OS=Homo sapiens GN=GAPDH PE=1 SV=3	44	44	44	44	44	44	44	44	44	44	44	44	528	8213490	7.23522e+06	7.08734e+06	6.86475e+06	7575024	8.25445e+06	9666624	9053661	9217748	8695785	9764222	8379665		7.3502e+06	8.63744e+06	9014355	2.5002e+07		0.815388	0.958187		0.00787819	0.52163
P06703;R4GN98	>sp|P06703|S10A6_HUMAN Protein S100-A6 OS=Homo sapiens GN=S100A6 PE=1 SV=1;>tr|R4GN98|R4GN98_HUMAN Protein S100 (Fragment) OS=Homo sapiens GN=S100A6 PE=1 SV=1	9	9	9	9	9	9	9	9	9	9	9	9	108	371682	189285	289683	353061	152783	139134	277572	283353	349020	138566	147310	161653		300928	213210	199137	713276		1.51116	1.07067		0.169701	0.832461
P06733	>sp|P06733|ENOA_HUMAN Alpha-enolase OS=Homo sapiens GN=ENO1 PE=1 SV=2	18	18	18	18	18	18	18	18	18	18	18	18	216	4409187	3327800	3.55006e+06	5602850	4.04455e+06	4.08024e+06	4.13544e+06	4180260	4.12628e+06	4560518	5313067	4739556		4.22248e+06	4.11012e+06	4.68486e+06	1.30175e+07		0.901303	0.877321		0.460841	0.100473
P06753	>sp|P06753|TPM3_HUMAN Tropomyosin alpha-3 chain OS=Homo sapiens GN=TPM3 PE=1 SV=2	19	19	19	19	19	19	19	19	19	19	19	19	228	8681341	10354015	8558708	8667085	9758557	7496045	8888887	9488030	9022307	7.89811e+06	8.12887e+06	8813145		9.06529e+06	8.90788e+06	8465609	26438776		1.07084	1.05224		0.290115	0.477098
P07195	>sp|P07195|LDHB_HUMAN L-lactate dehydrogenase B chain OS=Homo sapiens GN=LDHB PE=1 SV=2	24	24	24	24	24	24	24	24	24	24	24	24	288	864585	1.0184e+06	909850	904953	955314	846960	959336	1.00651e+06	954931	964652	936879	1.00735e+06		924446	942029	965954	2.83243e+06		0.957029	0.975232		0.312271	0.551183
P07384	>sp|P07384|CAN1_HUMAN Calpain-1 catalytic subunit OS=Homo sapiens GN=CAPN1 PE=1 SV=1	48	48	48	48	48	48	48	48	48	48	48	48	576	143687	116947	125896	50379.7	69390.6	95746.1	58310.9	54877.6	87508.8	145549	132083	40522.7		109227	69581.3	101416	280224		1.07702	0.686099		0.811604	0.282154
P07738	>sp|P07738|PMGE_HUMAN Bisphosphoglycerate mutase OS=Homo sapiens GN=BPGM PE=1 SV=2	17	17	17	17	17	17	17	17	17	17	17	17	204	657408	753763	638239	612553	758485	579212	694316	762060	665786	585367	613358	649401		665491	698518	628478	1.99249e+06		1.05889	1.11144		0.349167	0.204745
P07900	>sp|P07900|HS90A_HUMAN Heat shock protein HSP 90-alpha OS=Homo sapiens GN=HSP90AA1 PE=1 SV=5	30	30	30	30	30	30	30	30	30	30	30	30	360	9065185	5.36555e+06	8866360	8264233	6218011	7355945	7.2202e+06	6978473	9067214	7.38566e+06	7451501	8.08066e+06		7.89033e+06	6.94316e+06	7996259	2.28297e+07		0.986753	0.868301		0.915743	0.0714195
P08238	>sp|P08238|HS90B_HUMAN Heat shock protein HSP 90-beta OS=Homo sapiens GN=HSP90AB1 PE=1 SV=4	10	10	10	10	10	10	10	10	10	10	10	10	120	3.73025e+06	4.59251e+06	4685852	4.38344e+06	5.13874e+06	5.35783e+06	4.77399e+06	3.57287e+06	4241277	4.13987e+06	4496364	3.68424e+06		4.34801e+06	4.71086e+06	4.14044e+06	1.31993e+07		1.05013	1.13777		0.479112	0.256853
P08779	>sp|P08779|K1C16_HUMAN Keratin, type I cytoskeletal 16 OS=Homo sapiens GN=KRT16 PE=1 SV=4	3	3	3	3	3	3	3	3	3	3	3	3	36	25133.4	21880.3	22523.2	26017.8	293301	22084.7	22314.7	23366.3	20027.3	92017	24501.5	22155		23888.6	90266.7	39675.2	153831		0.602105	2.27514		0.4331	0.515845
P09211	>sp|P09211|GSTP1_HUMAN Glutathione S-transferase P OS=Homo sapiens GN=GSTP1 PE=1 SV=2	13	13	13	13	13	13	13	13	13	13	13	13	156	262147	232501	298820	221096	250489	262739	231286	203264	324593	313795	324134	277511		253641	236945	310008	800594		0.818175	0.764317		0.0402163	0.00548807
P10599	>sp|P10599|THIO_HUMAN Thioredoxin OS=Homo sapiens GN=TXN PE=1 SV=3	5	5	5	5	5	5	5	5	5	5	5	5	60	689029	1.09153e+06	827689	746801	913955	677889	760974	988351	961219	719820	777800	823551		838762	835292	820598	2.49465e+06		1.02214	1.01791		0.866874	0.872524
P10644	>sp|P10644|KAP0_HUMAN cAMP-dependent protein kinase type I-alpha regulatory subunit OS=Homo sapiens GN=PRKAR1A PE=1 SV=1	15	15	15	15	15	15	15	15	15	15	15	15	180	73402.9	34341.4	33774.2	46271.1	33243.5	67817.6	59592.1	49774.4	72542.2	44597.1	43212.3	56522.5		46947.4	52606.9	54218.5	153773		0.865892	0.970275		0.552627	0.878189
P11142	>sp|P11142|HSP7C_HUMAN Heat shock cognate 71 kDa protein OS=Homo sapiens GN=HSPA8 PE=1 SV=1	59	59	59	59	59	59	59	59	59	59	59	59	708	32606994	32346204	32025466	32527444	34317416	34343584	33828328	27854716	36580288	34908552	36045476	33643876		32376527	32586011	35294548	100257086		0.917324	0.923259		0.0186343	0.188657
P11166	>sp|P11166|GTR1_HUMAN Solute carrier family 2, facilitated glucose transporter member 1 OS=Homo sapiens GN=SLC2A1 PE=1 SV=2	29	29	29	29	29	29	29	29	29	29	29	29	348	63691	38787.4	77174.2	62699.1	53265.2	145450	60155.1	41974	89694.3	98206.1	63128.8	40589		60587.9	75211.1	72904.5	208704		0.831058	1.03164		0.458981	0.935678
P11277	>sp|P11277|SPTB1_HUMAN Spectrin beta chain, erythrocytic OS=Homo sapiens GN=SPTB PE=1 SV=5	354	354	354	354	354	354	354	354	354	354	354	354	4248	5.35798e+06	5501687	5913234	4.13259e+06	5591672	4622087	6075648	5.77359e+06	6612389	5312564	4684636	5.74428e+06		5.22637e+06	5.51575e+06	5.58847e+06	1.63306e+07		0.935207	0.986988		0.539998	0.892059
P12955	>sp|P12955|PEPD_HUMAN Xaa-Pro dipeptidase OS=Homo sapiens GN=PEPD PE=1 SV=3	9	9	9	9	9	9	9	9	9	9	9	9	108	98978.9	78323.2	103479	139055	82728.1	78191.8	77345.7	113575	139167	155351	162954	103353		104959	87960.1	140206	333126		0.748605	0.627362		0.102425	0.0204
P13489	>sp|P13489|RINI_HUMAN Ribonuclease inhibitor OS=Homo sapiens GN=RNH1 PE=1 SV=2	20	20	20	20	20	20	20	20	20	20	20	20	240	45378.8	33105.4	49455.9	38986.4	31263.7	37255.9	50366	35719.7	30938	37850.2	33261.6	22546.9		41731.6	38651.3	31149.2	111532		1.33973	1.24085		0.0709327	0.202769
P13645	>sp|P13645|K1C10_HUMAN Keratin, type I cytoskeletal 10 OS=Homo sapiens GN=KRT10 PE=1 SV=6	20	20	20	20	20	20	20	20	20	20	20	20	240	73124.7	577923	100525	94063.8	3374682	264331	72005.7	333038	213750	949152	102211	93020.6		211409	1.01101e+06	339533	1.56196e+06		0.622646	2.97766		0.615006	0.464303
P13647	>sp|P13647|K2C5_HUMAN Keratin, type II cytoskeletal 5 OS=Homo sapiens GN=KRT5 PE=1 SV=3	2	2	2	2	2	2	2	2	2	2	2	2	24	17462	89864.2	45236.7	37033.2	269090	25558.4	31805.1	39739	34590.4	103668	27911.3	25311.5		47399	91548.1	47870.3	186817		0.990156	1.91242		0.985099	0.524943
P13716	>sp|P13716|HEM2_HUMAN Delta-aminolevulinic acid dehydratase OS=Homo sapiens GN=ALAD PE=1 SV=1	11	11	11	11	11	11	11	11	11	11	11	11	132	2.10834e+06	2.20371e+06	2310668	2.19957e+06	2.4182e+06	1.78889e+06	2104171	2.38859e+06	2.54192e+06	2096765	2.05522e+06	2.81552e+06		2.20557e+06	2.17496e+06	2.37736e+06	6.75789e+06		0.927742	0.914867		0.421519	0.422913
P13796	>sp|P13796|PLSL_HUMAN Plastin-2 OS=Homo sapiens GN=LCP1 PE=1 SV=6	14	14	14	14	14	14	14	14	14	14	14	14	168	121489	74448.6	119695	115467	106973	67826.7	87257.4	127209	80420	72023.9	119049	125251		107775	97316.5	99186.1	304278		1.08659	0.981151		0.641057	0.922942
P14174	>sp|P14174|MIF_HUMAN Macrophage migration inhibitory factor OS=Homo sapiens GN=MIF PE=1 SV=4	3	3	3	3	3	3	3	3	3	3	3	3	36	496967	855003	632505	538644	780673	691487	1.15252e+06	843260	992543	540883	653911	793722		630780	866984	745265	2.24303e+06		0.846384	1.16332		0.39958	0.41689
P14735	>sp|P14735|IDE_HUMAN Insulin-degrading enzyme OS=Homo sapiens GN=IDE PE=1 SV=4	11	11	11	11	11	11	11	11	11	11	11	11	132	46296.8	33667.6	47442.9	63962.1	51782.9	49660.2	54454.8	33143.8	28085.1	47912.6	40117.3	34955.9		47842.3	47260.4	37767.7	132870		1.26675	1.25135		0.233779	0.187834
P15531	>sp|P15531|NDKA_HUMAN Nucleoside diphosphate kinase A OS=Homo sapiens GN=NME1 PE=1 SV=1	2	2	2	2	2	2	2	2	2	2	2	2	24	83301.1	71156.1	47621.7	58022.6	72292.1	62998	57595.4	63586.8	58540.5	59526.5	67906.9	56265		65025.4	64118.1	60559.7	189703		1.07374	1.05876		0.616477	0.404874
P16083;Q5TD05;Q5TD07	>sp|P16083|NQO2_HUMAN Ribosyldihydronicotinamide dehydrogenase [quinone] OS=Homo sapiens GN=NQO2 PE=1 SV=5;>tr|Q5TD05|Q5TD05_HUMAN Ribosyldihydronicotinamide dehydrogenase [quinone] (Fragment) OS=Homo sapiens GN=NQO2 PE=1 SV=1;>tr|Q5TD07|Q5TD07_HUMAN Ribosyldihydronicotinamide dehydrogenase [quinone] OS=Homo sapiens GN=NQO2 PE=1 SV=1	2	2	2	2	2	2	2	2	2	2	2	2	24	150820	24321.8	22366.2	70430.9	218769	22810.3	204828	18364.8	16249.4	103122	20807.7	94530.7		66984.8	116193	58677.6	241855		1.14157	1.98019		0.834728	0.391487
P16157	>sp|P16157|ANK1_HUMAN Ankyrin-1 OS=Homo sapiens GN=ANK1 PE=1 SV=3	199	199	199	199	199	199	199	199	199	199	199	199	2388	18480414	26268244	18504358	19039460	21717928	17332054	14966695	22145220	17368110	15923594	15310777	17030022		20573119	1.90405e+07	1.64081e+07	56021719		1.25384	1.16043		0.113682	0.229159
P16930	>sp|P16930|FAAA_HUMAN Fumarylacetoacetase OS=Homo sapiens GN=FAH PE=1 SV=2	6	6	6	6	6	6	6	6	6	6	6	6	72	108320	67872.6	82875.4	36166.6	47060.9	42021.7	41586.9	37212.7	57754.8	68231.1	36875.3	60248.6		73808.8	41970.5	55777.5	171557		1.32327	0.752464		0.333649	0.128279
P17174	>sp|P17174|AATC_HUMAN Aspartate aminotransferase, cytoplasmic OS=Homo sapiens GN=GOT1 PE=1 SV=3	13	13	13	13	13	13	13	13	13	13	13	13	156	177167	173023	73953.9	81499.3	218956	142577	149254	146460	151911	154693	209206	238819		126411	164312	188657	479380		0.670055	0.870954		0.132031	0.419633
P17987	>sp|P17987|TCPA_HUMAN T-complex protein 1 subunit alpha OS=Homo sapiens GN=TCP1 PE=1 SV=1	24	24	24	24	24	24	24	24	24	24	24	24	288	26844.1	42914.8	37481.9	16029.2	129163	49678.3	103014	62218.2	16793.1	27559.7	18050.1	16918.2		30817.5	86018.5	19830.3	136666		1.55406	4.33773		0.164143	0.0351697
P18206	>sp|P18206|VINC_HUMAN Vinculin OS=Homo sapiens GN=VCL PE=1 SV=4	4	4	4	4	4	4	4	4	4	4	4	4	48	773103	838849	691990	715868	895304	730734	756933	574865	963648	840368	808800	770318		754952	739459	845784	2.34019e+06		0.892607	0.874288		0.140903	0.229326
P19013	>sp|P19013|K2C4_HUMAN Keratin, type II cytoskeletal 4 OS=Homo sapiens GN=KRT4 PE=1 SV=4	1	1	1	1	1	1	1	1	1	1	1	1	12	19453.4	37920.3	24162.3	26275	76529.7	23691.9	12932.3	28632.8	33257.8	28242.9	32441.5	27148.5		26952.7	35446.7	30272.7	92672.1		0.890332	1.17091		0.475403	0.738589
P19320	>sp|P19320|VCAM1_HUMAN Vascular cell adhesion protein 1 OS=Homo sapiens GN=VCAM1 PE=1 SV=1	1	1	1	1	1	1	1	1	1	1	1	1	12	209244	358617	306677	221838	340252	263526	294499	355104	293495	214868	165257	264624		274094	313345	234561	822000		1.16854	1.33588		0.41877	0.0701771
P20618	>sp|P20618|PSB1_HUMAN Proteasome subunit beta type-1 OS=Homo sapiens GN=PSMB1 PE=1 SV=2	10	10	10	10	10	10	10	10	10	10	10	10	120	931784	953058	865732	910497	993550	905540	963710	801717	888590	949642	1.04109e+06	920701		915267	916129	950006	2.7814e+06		0.963433	0.96434		0.401776	0.551563
P21980	>sp|P21980|TGM2_HUMAN Protein-glutamine gamma-glutamyltransferase 2 OS=Homo sapiens GN=TGM2 PE=1 SV=2	21	21	21	21	21	21	21	21	21	21	21	21	252	63341.5	82082.5	83520.3	74056.9	77622.7	72722	81001.8	64573.7	62708.1	66948.9	87423.6	86620		75750.3	73980.1	75925.2	225655		0.997696	0.974381		0.983241	0.80348
P22314	>sp|P22314|UBA1_HUMAN Ubiquitin-like modifier-activating enzyme 1 OS=Homo sapiens GN=UBA1 PE=1 SV=3	34	34	34	34	34	34	34	34	34	34	34	34	408	44354.5	165537	43765.9	42336.5	50152.2	46136.6	40861.5	157128	23518	25941.4	26350	23130		73998.5	73569.5	24734.9	172303		2.99167	2.97433		0.204848	0.17854
P22392;Q32Q12	>sp|P22392|NDKB_HUMAN Nucleoside diphosphate kinase B OS=Homo sapiens GN=NME2 PE=1 SV=1;>tr|Q32Q12|Q32Q12_HUMAN Nucleoside diphosphate kinase OS=Homo sapiens GN=NME1-NME2 PE=1 SV=1	6	6	6	6	6	6	6	6	6	6	6	6	72	261719	336271	301673	238267	294438	271460	294702	300892	290818	228607	270231	281369		284482	290373	267756	842612		1.06247	1.08447		0.542546	0.205619
P23526	>sp|P23526|SAHH_HUMAN Adenosylhomocysteinase OS=Homo sapiens GN=AHCY PE=1 SV=4	18	18	18	18	18	18	18	18	18	18	18	18	216	285502	231439	322714	321431	279722	339548	327239	284601	324759	336107	340504	327495		290272	307778	332216	930265		0.873743	0.926438		0.144085	0.202807
P23634	>sp|P23634|AT2B4_HUMAN Plasma membrane calcium-transporting ATPase 4 OS=Homo sapiens GN=ATP2B4 PE=1 SV=2	25	25	25	25	25	25	25	25	25	25	25	25	300	360307	496790	417093	404792	518260	302363	390738	442293	366835	315753	359370	421183		419746	413414	365785	1.19894e+06		1.14752	1.13021		0.185108	0.393306
P24666	>sp|P24666|PPAC_HUMAN Low molecular weight phosphotyrosine protein phosphatase OS=Homo sapiens GN=ACP1 PE=1 SV=3	6	6	6	6	6	6	6	6	6	6	6	6	72	85991.1	112234	53416.5	56447.6	87581.3	39919.1	39256.1	79757.5	97890.3	75089.8	51350.4	98674.7		77022.3	61628.5	80751.3	219402		0.953821	0.763189		0.841492	0.305448
P25786	>sp|P25786|PSA1_HUMAN Proteasome subunit alpha type-1 OS=Homo sapiens GN=PSMA1 PE=1 SV=1	10	10	10	10	10	10	10	10	10	10	10	10	120	914731	1.01251e+06	914391	928434	1.02702e+06	846075	977094	850321	1.17427e+06	956526	959368	1.13173e+06		942517	925128	1.05547e+06	2.92312e+06		0.892979	0.876504		0.140945	0.126637
P25788	>sp|P25788|PSA3_HUMAN Proteasome subunit alpha type-3 OS=Homo sapiens GN=PSMA3 PE=1 SV=2	7	7	7	7	7	7	7	7	7	7	7	7	84	312693	267303	348864	339898	331494	280998	326058	345433	305419	333433	341129	312451		317190	320996	323108	961294		0.981683	0.993463		0.783136	0.902041
P26447	>sp|P26447|S10A4_HUMAN Protein S100-A4 OS=Homo sapiens GN=S100A4 PE=1 SV=1	9	9	9	9	9	9	9	9	9	9	9	9	108	229142	275325	220599	247212	288088	245544	232957	255949	229517	229764	217457	213528		243070	255634	222567	721271		1.09212	1.14857		0.190011	0.0615464
P27348	>sp|P27348|1433T_HUMAN 14-3-3 protein theta OS=Homo sapiens GN=YWHAQ PE=1 SV=1	9	9	9	9	9	9	9	9	9	9	9	9	108	41521.4	33828.1	28603.5	26199.8	43751.3	39450.4	22722.1	44982.3	30690	33278	47151.3	35358.5		32538.2	37726.5	36619.5	106884		0.888549	1.03023		0.443411	0.866857
P28066	>sp|P28066|PSA5_HUMAN Proteasome subunit alpha type-5 OS=Homo sapiens GN=PSMA5 PE=1 SV=3	10	10	10	10	10	10	10	10	10	10	10	10	120	982353	1.1672e+06	1.18484e+06	1.20253e+06	1.02436e+06	1.00685e+06	1.20159e+06	1.0793e+06	1.38049e+06	1.28933e+06	1.2704e+06	1.07097e+06		1.13423e+06	1.07802e+06	1.2528e+06	3.46505e+06		0.905359	0.860495		0.205116	0.0742436
P28070	>sp|P28070|PSB4_HUMAN Proteasome subunit beta type-4 OS=Homo sapiens GN=PSMB4 PE=1 SV=4	3	3	3	3	3	3	3	3	3	3	3	3	36	37130.6	24676.2	234163	227797	270650	273903	24195.8	311731	288881	184624	28843.6	273248		130942	220120	193899	544961		0.675308	1.13523		0.477166	0.778107
P28072	>sp|P28072|PSB6_HUMAN Proteasome subunit beta type-6 OS=Homo sapiens GN=PSMB6 PE=1 SV=4	2	2	2	2	2	2	2	2	2	2	2	2	24	677716	691069	721920	752504	771812	644685	719316	632570	786252	694710	757052	760546		710802	692096	749640	2.15254e+06		0.948191	0.923238		0.181467	0.192769
P28074	>sp|P28074|PSB5_HUMAN Proteasome subunit beta type-5 OS=Homo sapiens GN=PSMB5 PE=1 SV=3	8	8	8	8	8	8	8	8	8	8	8	8	96	346407	253489	340567	341641	357610	316418	363319	346185	343563	358551	362785	341709		320526	345883	351652	1.01806e+06		0.911485	0.983593		0.260378	0.645614
P28289	>sp|P28289|TMOD1_HUMAN Tropomodulin-1 OS=Homo sapiens GN=TMOD1 PE=1 SV=1	52	52	52	52	52	52	52	52	52	52	52	52	624	6092152	5.57903e+06	6285346	6271958	5774700	4280623	5.20593e+06	7311143	5.17215e+06	4.80327e+06	4714353	5.53267e+06		6.05712e+06	5.6431e+06	5.05561e+06	1.67558e+07		1.1981	1.11621		0.00728234	0.431712
P29144;Q5VZU9	>sp|P29144|TPP2_HUMAN Tripeptidyl-peptidase 2 OS=Homo sapiens GN=TPP2 PE=1 SV=4;>tr|Q5VZU9|Q5VZU9_HUMAN Tripeptidyl-peptidase 2 OS=Homo sapiens GN=TPP2 PE=1 SV=1	11	11	11	11	11	11	11	11	11	11	11	11	132	64031.2	26159.8	74566.5	72668.9	27004.9	61641.3	61597.5	16249.5	19938.3	58359.6	49234.8	33890.2		59356.6	41623.3	40355.7	141336		1.47084	1.03141		0.230789	0.933403
P29401	>sp|P29401|TKT_HUMAN Transketolase OS=Homo sapiens GN=TKT PE=1 SV=3	10	10	10	10	10	10	10	10	10	10	10	10	120	22767.4	34303.9	44887.7	18693.5	55357	23527.3	63392.1	30431	25252.7	20462.7	40428.8	45588.4		30163.1	43176.8	32933.1	106273		0.91589	1.31105		0.753395	0.406577
P30041	>sp|P30041|PRDX6_HUMAN Peroxiredoxin-6 OS=Homo sapiens GN=PRDX6 PE=1 SV=3	29	29	29	29	29	29	29	29	29	29	29	29	348	309355	254418	214448	342345	320155	214745	297169	308612	338997	304996	340676	332774		280142	285170	329361	894673		0.850561	0.865828		0.181805	0.161642
P30043	>sp|P30043|BLVRB_HUMAN Flavin reductase (NADPH) OS=Homo sapiens GN=BLVRB PE=1 SV=3	21	21	21	21	21	21	21	21	21	21	21	21	252	2.25537e+06	2.00369e+06	2024629	2.37822e+06	1.72004e+06	1932792	2.14502e+06	1.99959e+06	1826852	1.98342e+06	1.88948e+06	1.86959e+06		2.16548e+06	1.94936e+06	1.89234e+06	6.00718e+06		1.14434	1.03014		0.0510088	0.579521
P30044	>sp|P30044|PRDX5_HUMAN Peroxiredoxin-5, mitochondrial OS=Homo sapiens GN=PRDX5 PE=1 SV=4	6	6	6	6	6	6	6	6	6	6	6	6	72	23129.8	35652	19784.7	19155.7	8802.86	19819.2	35627.9	16370.5	20699.8	18015.5	21852.1	13922.6		24430.6	20155.1	18622.5	63208.2		1.31188	1.0823		0.237914	0.809783
P30085;Q5T0D2	>sp|P30085|KCY_HUMAN UMP-CMP kinase OS=Homo sapiens GN=CMPK1 PE=1 SV=3;>tr|Q5T0D2|Q5T0D2_HUMAN UMP-CMP kinase OS=Homo sapiens GN=CMPK1 PE=1 SV=1	3	3	3	3	3	3	3	3	3	3	3	3	36	131375	16207.7	15526	154370	261182	131176	163739	129025	168801	198561	26706.8	262517		79369.6	171281	164146	414796		0.483529	1.04346		0.224597	0.907931
P30086	>sp|P30086|PEBP1_HUMAN Phosphatidylethanolamine-binding protein 1 OS=Homo sapiens GN=PEBP1 PE=1 SV=3	11	11	11	11	11	11	11	11	11	11	11	11	132	24626	23562.2	30689.3	29525.8	23125.9	25787.5	23763.2	51575	31726.2	23734.6	22284.3	34213.3		27100.8	31062.9	27989.6	86153.3		0.968246	1.1098		0.805749	0.701259
P30613	>sp|P30613|KPYR_HUMAN Pyruvate kinase PKLR OS=Homo sapiens GN=PKLR PE=1 SV=2	25	25	25	25	25	25	25	25	25	25	25	25	300	159936	111037	110587	113945	100114	95618.8	102007	166134	76662.8	112614	88957	118102		123876	115969	99083.9	338929		1.25021	1.17041		0.163335	0.425746
P30740	>sp|P30740|ILEU_HUMAN Leukocyte elastase inhibitor OS=Homo sapiens GN=SERPINB1 PE=1 SV=1	11	11	11	11	11	11	11	11	11	11	11	11	132	64231.3	63321.1	58744.8	27523.3	72076.2	32319.9	91859	85512.5	106240	63513.2	37448.4	73578.6		53455.1	70441.9	70195.1	194092		0.761522	1.00352		0.362022	0.990321
P31939	>sp|P31939|PUR9_HUMAN Bifunctional purine biosynthesis protein PURH OS=Homo sapiens GN=ATIC PE=1 SV=3	27	27	27	27	27	27	27	27	27	27	27	27	324	81003.9	88704.7	95149	98128.3	64981.8	75301.8	110339	108941	97183	97585.1	121602	79259		90746.5	89890.8	98907.3	279545		0.91749	0.908839		0.436768	0.558453
P31946	>sp|P31946|1433B_HUMAN 14-3-3 protein beta/alpha OS=Homo sapiens GN=YWHAB PE=1 SV=3	5	5	5	5	5	5	5	5	5	5	5	5	60	48636.8	53445.9	72717	49691.8	49399.9	45958.7	56266.6	66237.1	53262.6	48823.7	57395.7	25711.2		56122.9	54465.6	46298.3	156887		1.2122	1.17641		0.321131	0.373721
P31948	>sp|P31948|STIP1_HUMAN Stress-induced-phosphoprotein 1 OS=Homo sapiens GN=STIP1 PE=1 SV=1	21	21	21	21	21	21	21	21	21	21	21	21	252	146181	79312.1	57547.8	62131.6	76031.9	139027	137711	144360	149223	136365	123955	167079		86293	124283	144156	354731		0.598609	0.862141		0.0593376	0.336263
P32119	>sp|P32119|PRDX2_HUMAN Peroxiredoxin-2 OS=Homo sapiens GN=PRDX2 PE=1 SV=5	26	26	26	26	26	26	26	26	26	26	26	26	312	43804184	43884012	37115888	39677944	45402960	33115460	44669376	44217584	53507152	41922724	49861068	54338788		41120507	41851345	49907433	132879285		0.823936	0.838579		0.0454965	0.0951794
P34932	>sp|P34932|HSP74_HUMAN Heat shock 70 kDa protein 4 OS=Homo sapiens GN=HSPA4 PE=1 SV=4	21	21	21	21	21	21	21	21	21	21	21	21	252	28024.9	25528.2	23544.2	49785	21092	39036.8	37741.9	34504.4	69553.9	48097.4	31457.5	32285.4		31720.6	33093.8	45348.6	110163		0.699483	0.729764		0.260121	0.277356
P35527	>sp|P35527|K1C9_HUMAN Keratin, type I cytoskeletal 9 OS=Homo sapiens GN=KRT9 PE=1 SV=3	10	10	10	10	10	10	10	10	10	10	10	10	120	29258.7	477542	757852	772339	1.41986e+06	548344	22429.3	648387	24616.7	763087	304945	98023.7		509248	659754	297668	1.46667e+06		1.71079	2.21641		0.41272	0.327983
P35579	>sp|P35579|MYH9_HUMAN Myosin-9 OS=Homo sapiens GN=MYH9 PE=1 SV=4	27	27	27	27	27	27	27	27	27	27	27	27	324	35500.7	32614	26012	46581.7	43813.2	23507	21263.8	29783.5	32565.6	41301	29951.6	32136.3		35177.1	29591.9	33988.6	98757.6		1.03497	0.87064		0.820686	0.476805
P35612	>sp|P35612|ADDB_HUMAN Beta-adducin OS=Homo sapiens GN=ADD2 PE=1 SV=3	67	67	67	67	67	67	67	67	67	67	67	67	804	3.837e+06	3.1594e+06	2.98166e+06	3258199	2.97598e+06	3.02511e+06	2.34913e+06	3.58796e+06	2895206	2.79296e+06	2.09932e+06	2.68611e+06		3.30907e+06	2.98454e+06	2.6184e+06	8.91201e+06		1.26377	1.13984		0.0361808	0.286603
P35754	>sp|P35754|GLRX1_HUMAN Glutaredoxin-1 OS=Homo sapiens GN=GLRX PE=1 SV=2	5	5	5	5	5	5	5	5	5	5	5	5	60	3.99731e+06	6144512	3359507	3.24137e+06	5.67711e+06	3.96761e+06	4885559	4.75562e+06	5118915	4059546	3970007	4.86363e+06		4.18567e+06	4.82147e+06	4.50302e+06	1.35102e+07		0.929525	1.07072		0.686848	0.509147
P35908	>sp|P35908|K22E_HUMAN Keratin, type II cytoskeletal 2 epidermal OS=Homo sapiens GN=KRT2 PE=1 SV=2	21	21	21	21	21	21	21	21	21	21	21	21	252	54369.6	564663	181044	303930	3.06564e+06	434560	49268.7	338202	116314	1120332	124621	102583		276002	971918	365963	1.61388e+06		0.75418	2.65578		0.758848	0.465156
P35998	>sp|P35998|PRS7_HUMAN 26S proteasome regulatory subunit 7 OS=Homo sapiens GN=PSMC2 PE=1 SV=3	20	20	20	20	20	20	20	20	20	20	20	20	240	102145	55091.7	131590	148030	92740.8	102680	89065.9	54251	132838	125325	108038	60161.9		109214	84684.5	106591	300489		1.02461	0.794484		0.923405	0.309562
P36959	>sp|P36959|GMPR1_HUMAN GMP reductase 1 OS=Homo sapiens GN=GMPR PE=1 SV=1	11	11	11	11	11	11	11	11	11	11	11	11	132	416462	412069	355617	418500	306636	403726	398803	477704	448720	382983	463695	412096		400662	396717	426873	1.22425e+06		0.938598	0.929356		0.31135	0.48299
P37837	>sp|P37837|TALDO_HUMAN Transaldolase OS=Homo sapiens GN=TALDO1 PE=1 SV=2	15	15	15	15	15	15	15	15	15	15	15	15	180	1.14522e+06	1.42201e+06	1.00396e+06	930504	1.47852e+06	1.09771e+06	1.39158e+06	1.3087e+06	1.23044e+06	1.02455e+06	1.03148e+06	1.18217e+06		1125425	1.31913e+06	1.11716e+06	3.56171e+06		1.0074	1.18079		0.948336	0.090367
P38606	>sp|P38606|VATA_HUMAN V-type proton ATPase catalytic subunit A OS=Homo sapiens GN=ATP6V1A PE=1 SV=2	17	17	17	17	17	17	17	17	17	17	17	17	204	25446.5	93348.4	68002.4	83875.6	90916	129826	69513.9	82298	128025	129548	131910	95823.2		67668.2	93138.6	121327	282133		0.557736	0.767667		0.0284907	0.127536
P40227	>sp|P40227|TCPZ_HUMAN T-complex protein 1 subunit zeta OS=Homo sapiens GN=CCT6A PE=1 SV=3	16	16	16	16	16	16	16	16	16	16	16	16	192	37580.2	25371.7	30146	56160.1	38769.6	58699.3	55947.1	44133.3	25550.4	53355.4	49702.3	30439.5		37314.5	49387.3	39761.9	126464		0.938448	1.24208		0.808616	0.299727
P40925	>sp|P40925|MDHC_HUMAN Malate dehydrogenase, cytoplasmic OS=Homo sapiens GN=MDH1 PE=1 SV=4	16	16	16	16	16	16	16	16	16	16	16	16	192	27779.9	41340.6	178026	164868	49173.6	65727.8	55266.6	148246	45002.6	174752	68120.1	58013		103004	79603.4	86471.9	269079		1.19118	0.920569		0.75132	0.861898
P41091	>sp|P41091|IF2G_HUMAN Eukaryotic translation initiation factor 2 subunit 3 OS=Homo sapiens GN=EIF2S3 PE=1 SV=3	10	10	10	10	10	10	10	10	10	10	10	10	120	213252	357066	177668	173491	318808	244493	280348	253767	241644	215858	184489	242752		230369	274354	221185	725909		1.04152	1.24038		0.850251	0.0503036
P43034	>sp|P43034|LIS1_HUMAN Platelet-activating factor acetylhydrolase IB subunit alpha OS=Homo sapiens GN=PAFAH1B1 PE=1 SV=2	7	7	7	7	7	7	7	7	7	7	7	7	84	46953.2	46422.2	46241.1	31768.9	47804.2	35524.2	49426.1	45393.6	21059.8	32160.5	31060.6	15895.7		42846.3	44537	25044.1	112428		1.71083	1.77834		0.0166118	0.00904255
P43686	>sp|P43686|PRS6B_HUMAN 26S proteasome regulatory subunit 6B OS=Homo sapiens GN=PSMC4 PE=1 SV=2	21	21	21	21	21	21	21	21	21	21	21	21	252	299365	216170	215567	325697	317535	278253	222924	235805	228303	259425	197450	210584		264200	263629	223940	751769		1.17978	1.17723		0.265231	0.177848
P45974	>sp|P45974|UBP5_HUMAN Ubiquitin carboxyl-terminal hydrolase 5 OS=Homo sapiens GN=USP5 PE=1 SV=2	21	21	21	21	21	21	21	21	21	21	21	21	252	111693	81859.3	159318	136343	120225	67993	109946	163808	182602	95934	140649	211981		122303	115493	157791	395588		0.775095	0.731935		0.29193	0.23762
P48147	>sp|P48147|PPCE_HUMAN Prolyl endopeptidase OS=Homo sapiens GN=PREP PE=1 SV=2	9	9	9	9	9	9	9	9	9	9	9	9	108	25589.7	24135.3	16792.3	41161.9	28373	33822.5	48383.1	21838.7	26560.3	21486.9	26210.3	20718.5		26919.8	33104.3	23744	83768.1		1.13375	1.39422		0.588508	0.196589
P48426	>sp|P48426|PI42A_HUMAN Phosphatidylinositol 5-phosphate 4-kinase type-2 alpha OS=Homo sapiens GN=PIP4K2A PE=1 SV=2	9	9	9	9	9	9	9	9	9	9	9	9	108	149185	198513	146125	188830	173031	180212	186314	184248	139327	164846	172838	150748		170663	180951	156940	508554		1.08744	1.153		0.415331	0.0409851
P48507	>sp|P48507|GSH0_HUMAN Glutamate--cysteine ligase regulatory subunit OS=Homo sapiens GN=GCLM PE=1 SV=1	6	6	6	6	6	6	6	6	6	6	6	6	72	43846.5	40652.7	44759.7	38897.9	24495.1	48086.7	47800.6	38515.3	37585.9	39147.6	40316.7	22138.5		42039.2	39724.4	34797.2	116561		1.20812	1.1416		0.188131	0.50886
P48637	>sp|P48637|GSHB_HUMAN Glutathione synthetase OS=Homo sapiens GN=GSS PE=1 SV=1	16	16	16	16	16	16	16	16	16	16	16	16	192	288464	278050	317452	292664	282028	254349	296410	263563	310233	283239	293803	280674		294157	274087	291987	860232		1.00743	0.938697		0.846487	0.177518
P48741	>sp|P48741|HSP77_HUMAN Putative heat shock 70 kDa protein 7 OS=Homo sapiens GN=HSPA7 PE=5 SV=2	1	1	1	1	1	1	1	1	1	1	1	1	12	2.00725e+06	2.017e+06	1.3772e+06	1.61462e+06	1.93247e+06	1.73391e+06	1.58165e+06	1.90758e+06	1.89201e+06	1.79725e+06	1.77484e+06	1.97272e+06		1.75402e+06	1.7889e+06	1.8592e+06	5.40212e+06		0.943423	0.962185		0.558984	0.489416
P49247	>sp|P49247|RPIA_HUMAN Ribose-5-phosphate isomerase OS=Homo sapiens GN=RPIA PE=1 SV=3	9	9	9	9	9	9	9	9	9	9	9	9	108	61831.6	55460.7	130520	62064.3	48568	50417.3	63385.4	176881	104444	59823.2	116885	133862		77469.3	84813	103754	266036		0.746666	0.817447		0.312019	0.611164
P49454	>sp|P49454|CENPF_HUMAN Centromere protein F OS=Homo sapiens GN=CENPF PE=1 SV=2	2	2	2	2	2	2	2	2	2	2	2	2	24	108526	95873.8	74905.2	99898.5	50387.9	75614.4	115571	87062.9	86593.5	76526.2	104557	75246.6		94801	82159	85730.8	262691		1.1058	0.958337		0.392159	0.823786
P49591;Q5T5C7	>sp|P49591|SYSC_HUMAN Serine--tRNA ligase, cytoplasmic OS=Homo sapiens GN=SARS PE=1 SV=3;>tr|Q5T5C7|Q5T5C7_HUMAN Serine--tRNA ligase, cytoplasmic OS=Homo sapiens GN=SARS PE=1 SV=1	4	4	4	4	4	4	4	4	4	4	4	4	48	52418.5	25524	82342	49280.6	20149.6	61843.8	25027	47690.2	97274.2	24725.7	38487.7	66205		52391.3	38677.7	56673.1	147742		0.924446	0.682469		0.836868	0.382616
P49720	>sp|P49720|PSB3_HUMAN Proteasome subunit beta type-3 OS=Homo sapiens GN=PSMB3 PE=1 SV=2	8	8	8	8	8	8	8	8	8	8	8	8	96	153198	80988.9	136529	163450	95744	141554	130260	132753	58509.1	158825	127992	38086.8		133541	125078	95853.3	354473		1.39319	1.30489		0.315481	0.391592
P49721	>sp|P49721|PSB2_HUMAN Proteasome subunit beta type-2 OS=Homo sapiens GN=PSMB2 PE=1 SV=1	8	8	8	8	8	8	8	8	8	8	8	8	96	1.42673e+06	918277	1.66915e+06	1.56988e+06	1.72198e+06	1.11056e+06	1.05497e+06	1775079	1.68847e+06	1110250	1.22435e+06	1.53701e+06		1.39601e+06	1.41565e+06	1.39002e+06	4.20168e+06		1.00431	1.01844		0.978638	0.917116
P50395	>sp|P50395|GDIB_HUMAN Rab GDP dissociation inhibitor beta OS=Homo sapiens GN=GDI2 PE=1 SV=2	32	32	32	32	32	32	32	32	32	32	32	32	384	30343.8	30227.8	37728	54426.1	31607.9	56317.5	32164	31283.1	33969.1	33881.8	30310.3	22898.2		38181.4	37843.1	30264.8	106289		1.26158	1.2504		0.271467	0.319881
P50502	>sp|P50502|F10A1_HUMAN Hsc70-interacting protein OS=Homo sapiens GN=ST13 PE=1 SV=2	8	8	8	8	8	8	8	8	8	8	8	8	96	1.20746e+06	1.37431e+06	1.10343e+06	1.18261e+06	1.01647e+06	1.01241e+06	1.19497e+06	1.42174e+06	1.16671e+06	963291	1.02337e+06	1351110		1.21695e+06	1.1614e+06	1.12612e+06	3.50447e+06		1.08066	1.03133		0.418382	0.794656
P50570	>sp|P50570|DYN2_HUMAN Dynamin-2 OS=Homo sapiens GN=DNM2 PE=1 SV=2	11	11	11	11	11	11	11	11	11	11	11	11	132	27624.4	19962.1	18387.4	18661.7	16788.7	26689.4	19883.6	53488.5	21443.2	19523.7	21010	91253.5		21158.9	29212.5	38307.6	88679.1		0.552343	0.762579		0.404212	0.664149
P50990	>sp|P50990|TCPQ_HUMAN T-complex protein 1 subunit theta OS=Homo sapiens GN=CCT8 PE=1 SV=4	16	16	16	16	16	16	16	16	16	16	16	16	192	151828	134238	163103	185462	170677	179352	144778	182438	164447	139015	167671	148674		158658	169311	154952	482921		1.02392	1.09267		0.781564	0.237753
P50991	>sp|P50991|TCPD_HUMAN T-complex protein 1 subunit delta OS=Homo sapiens GN=CCT4 PE=1 SV=4	17	17	17	17	17	17	17	17	17	17	17	17	204	137844	191988	169175	199105	124729	111739	143224	218253	190047	144903	195540	185171		174528	149486	178915	502929		0.975478	0.835514		0.815602	0.323918
P51148	>sp|P51148|RAB5C_HUMAN Ras-related protein Rab-5C OS=Homo sapiens GN=RAB5C PE=1 SV=2	7	7	7	7	7	7	7	7	7	7	7	7	84	102069	120066	110829	104563	31771.9	87658.6	115079	119086	20144.1	84197.3	97538.1	107245		109382	88399	77281.1	275062		1.41538	1.14386		0.200328	0.706142
P53396	>sp|P53396|ACLY_HUMAN ATP-citrate synthase OS=Homo sapiens GN=ACLY PE=1 SV=3	37	37	37	37	37	37	37	37	37	37	37	37	444	22404.3	24260.7	41664.6	36161.7	31906.5	19008.9	20360.3	14894.1	30552	41336.6	38737.2	15302.8		31122.8	21542.4	31482.1	84147.4		0.988586	0.684275		0.963339	0.209234
P54725	>sp|P54725|RD23A_HUMAN UV excision repair protein RAD23 homolog A OS=Homo sapiens GN=RAD23A PE=1 SV=1	12	12	12	12	12	12	12	12	12	12	12	12	144	138003	271862	179239	154681	196122	172591	207092	245385	143720	164250	197140	148191		185946	205297	163325	554569		1.1385	1.25699		0.521746	0.0761046
P54727	>sp|P54727|RD23B_HUMAN UV excision repair protein RAD23 homolog B OS=Homo sapiens GN=RAD23B PE=1 SV=1	5	5	5	5	5	5	5	5	5	5	5	5	60	18694.9	18864	38456.9	49764.8	58021	30628.9	18280.1	39140.2	22758.6	27391.3	40829	64832.1		31445.1	36517.6	38952.8	106915		0.807263	0.937483		0.560616	0.85324
P55036	>sp|P55036|PSMD4_HUMAN 26S proteasome non-ATPase regulatory subunit 4 OS=Homo sapiens GN=PSMD4 PE=1 SV=1	8	8	8	8	8	8	8	8	8	8	8	8	96	20390.7	21081.1	23955.4	20658.5	25121.8	21087.9	21309.5	24256.3	24808.1	37475.7	57720.2	24413.4		21521.4	22943.9	36104.4	80569.7		0.59609	0.635488		0.15861	0.190654
P55072	>sp|P55072|TERA_HUMAN Transitional endoplasmic reticulum ATPase OS=Homo sapiens GN=VCP PE=1 SV=4	43	43	43	43	43	43	43	43	43	43	43	43	516	2317161	2.32423e+06	2.11822e+06	2.09112e+06	2006533	1.96808e+06	2.08318e+06	2134415	2.39414e+06	2208754	2.09163e+06	2.29957e+06		2.21268e+06	2.04805e+06	2.24852e+06	6.50926e+06		0.984061	0.910844		0.704075	0.0452204
P60174	>sp|P60174|TPIS_HUMAN Triosephosphate isomerase OS=Homo sapiens GN=TPI1 PE=1 SV=3	19	19	19	19	19	19	19	19	19	19	19	19	228	3966013	5451874	3673582	3.93042e+06	4501129	3.49004e+06	4446969	5025360	4.65486e+06	4275859	3518852	4334133		4.25547e+06	4.36587e+06	4.19593e+06	1.28173e+07		1.01419	1.0405		0.904286	0.686956
P60709	>sp|P60709|ACTB_HUMAN Actin, cytoplasmic 1 OS=Homo sapiens GN=ACTB PE=1 SV=1	56	56	56	56	56	56	56	56	56	56	56	56	672	1.53137e+06	1453121	1.29672e+06	1.31526e+06	1596315	1330568	1.51075e+06	1.61407e+06	1.41327e+06	1.42311e+06	1.34035e+06	1.43011e+06		1.39912e+06	1.51293e+06	1.40171e+06	4.31375e+06		0.998153	1.07934		0.967702	0.185311
P60891	>sp|P60891|PRPS1_HUMAN Ribose-phosphate pyrophosphokinase 1 OS=Homo sapiens GN=PRPS1 PE=1 SV=2	10	10	10	10	10	10	10	10	10	10	10	10	120	22363	21330.4	46875.6	41963.1	31705.8	37767.8	32470.8	36019.7	34200	36146.2	44195.3	33468.2		33133	34491	37002.4	104626		0.895429	0.932128		0.61317	0.4204
P61225	>sp|P61225|RAP2B_HUMAN Ras-related protein Rap-2b OS=Homo sapiens GN=RAP2B PE=1 SV=1	14	14	14	14	14	14	14	14	14	14	14	14	168	32927.3	27826.2	26510.2	34561.8	36517.3	52795.1	27284.5	70300.9	53385.5	87934.2	206574	12997		30456.4	46724.4	90222.7	167403		0.337569	0.517879		0.247236	0.377529
P61970	>sp|P61970|NTF2_HUMAN Nuclear transport factor 2 OS=Homo sapiens GN=NUTF2 PE=1 SV=1	7	7	7	7	7	7	7	7	7	7	7	7	84	2.31945e+06	3.18637e+06	2.40685e+06	2.21006e+06	3004696	2180882	2.45599e+06	2895481	2487388	2.10323e+06	2274887	2327013		2.53068e+06	2.63426e+06	2.29813e+06	7.46308e+06		1.10119	1.14626		0.383515	0.181168
P61978;Q5T6W2	>sp|P61978|HNRPK_HUMAN Heterogeneous nuclear ribonucleoprotein K OS=Homo sapiens GN=HNRNPK PE=1 SV=1;>tr|Q5T6W2|Q5T6W2_HUMAN Heterogeneous nuclear ribonucleoprotein K (Fragment) OS=Homo sapiens GN=HNRNPK PE=1 SV=1	1	1	1	1	1	1	1	1	1	1	1	1	12	13353.4	54001.4	24950.9	29565.2	39704.4	39463.5	45708.1	39898.2	47753.7	33564.9	26819.8	49553.2		30467.7	41193.5	39422.9	111084		0.772843	1.04491		0.41827	0.774646
P61981	>sp|P61981|1433G_HUMAN 14-3-3 protein gamma OS=Homo sapiens GN=YWHAG PE=1 SV=2	6	6	6	6	6	6	6	6	6	6	6	6	72	165570	199095	132965	152074	205035	153335	188019	198494	147382	167053	162921	161075		162426	186221	159608	508254		1.01766	1.16674		0.857176	0.099414
P62191	>sp|P62191|PRS4_HUMAN 26S proteasome regulatory subunit 4 OS=Homo sapiens GN=PSMC1 PE=1 SV=1	16	16	16	16	16	16	16	16	16	16	16	16	192	67205.4	93221.6	138954	69971.2	59904.4	79322.9	84248.2	60416.4	71633.5	71336.2	64885.3	59638.7		92338.1	70973	66873.4	230185		1.38079	1.0613		0.222761	0.585393
P62195	>sp|P62195|PRS8_HUMAN 26S proteasome regulatory subunit 8 OS=Homo sapiens GN=PSMC5 PE=1 SV=1	12	12	12	12	12	12	12	12	12	12	12	12	144	1.14736e+06	1.71252e+06	1.15755e+06	1.28417e+06	1.4557e+06	1.26463e+06	1.21373e+06	1.4955e+06	1.32391e+06	1.04794e+06	1.25944e+06	1.30976e+06		1.3254e+06	1.35739e+06	1.23526e+06	3.91805e+06		1.07297	1.09887		0.571431	0.243885
P62258	>sp|P62258|1433E_HUMAN 14-3-3 protein epsilon OS=Homo sapiens GN=YWHAE PE=1 SV=1	26	26	26	26	26	26	26	26	26	26	26	26	312	2879135	2.59235e+06	3657603	2.79948e+06	2.74886e+06	2.6674e+06	2607328	3.07636e+06	3.28424e+06	2678409	2.61496e+06	4269219		2.98214e+06	2774987	3.21171e+06	8.96884e+06		0.928523	0.864023		0.63093	0.342642
P62805	>sp|P62805|H4_HUMAN Histone H4 OS=Homo sapiens GN=HIST1H4A PE=1 SV=2	9	9	9	9	9	9	9	9	9	9	9	9	108	746687	622450	861898	812691	684178	701496	675267	583965	708083	885710	666594	671263		760932	661227	732913	2.15507e+06		1.03823	0.90219		0.715326	0.278219
P62834	>sp|P62834|RAP1A_HUMAN Ras-related protein Rap-1A OS=Homo sapiens GN=RAP1A PE=1 SV=1	11	11	11	11	11	11	11	11	11	11	11	11	132	396856	310400	243518	351541	349716	232166	348915	258930	236036	290654	296787	297140		325579	297432	280154	903165		1.16214	1.06167		0.269942	0.634616
P62937	>sp|P62937|PPIA_HUMAN Peptidyl-prolyl cis-trans isomerase A OS=Homo sapiens GN=PPIA PE=1 SV=2	13	13	13	13	13	13	13	13	13	13	13	13	156	102324	258251	183543	194505	125591	177758	138494	205099	193785	164602	174483	189174		184656	161735	180511	526902		1.02296	0.895985		0.906565	0.390999
P63261	>sp|P63261|ACTG_HUMAN Actin, cytoplasmic 2 OS=Homo sapiens GN=ACTG1 PE=1 SV=1	2	2	2	2	2	2	2	2	2	2	2	2	24	150274	213946	220072	225155	306197	167874	183168	312564	259448	141637	136267	294848		202362	242451	208050	652862		0.972659	1.16535		0.903643	0.562434
P67775	>sp|P67775|PP2AA_HUMAN Serine/threonine-protein phosphatase 2A catalytic subunit alpha isoform OS=Homo sapiens GN=PPP2CA PE=1 SV=1	5	5	5	5	5	5	5	5	5	5	5	5	60	230259	267785	272842	252593	228637	14336.3	268287	282264	213257	228259	225315	216198		255870	198381	220757	675008		1.15906	0.898638		0.0282205	0.743866
P68871	>sp|P68871|HBB_HUMAN Hemoglobin subunit beta OS=Homo sapiens GN=HBB PE=1 SV=2	27	27	27	27	27	27	27	27	27	27	27	27	324	749198848	950208896	779097280	786161152	931331264	713986112	784358528	895899712	869186944	731391488	754737024	901480320		816166544	831393904	814198944	2461759392		1.00242	1.02112		0.975622	0.801403
P69891	>sp|P69891|HBG1_HUMAN Hemoglobin subunit gamma-1 OS=Homo sapiens GN=HBG1 PE=1 SV=2	2	2	2	2	2	2	2	2	2	2	2	2	24	370984	385725	528284	436561	391359	422468	365851	605379	526121	447193	319992	508945		430388	446264	450563	1.32722e+06		0.955224	0.99046		0.743537	0.954128
P69892	>sp|P69892|HBG2_HUMAN Hemoglobin subunit gamma-2 OS=Homo sapiens GN=HBG2 PE=1 SV=2	15	15	15	15	15	15	15	15	15	15	15	15	180	5126087	5073615	4855041	3.31018e+06	3794507	17659304	3650922	3.7776e+06	3.52277e+06	10976759	3.23333e+06	3.4065e+06		4.59123e+06	7.22058e+06	5.28484e+06	1.70967e+07		0.868755	1.36628		0.743126	0.647493
P69905	>sp|P69905|HBA_HUMAN Hemoglobin subunit alpha OS=Homo sapiens GN=HBA1 PE=1 SV=2	35	35	35	35	35	35	35	35	35	35	35	35	420	350912256	236498496	291794432	222552976	178341056	220846848	155069408	368974944	272509664	258754960	146080448	370626656		275439540	230808064	261992932	768240536		1.05132	0.880971		0.814745	0.655603
P78417;Q5TA02	>sp|P78417|GSTO1_HUMAN Glutathione S-transferase omega-1 OS=Homo sapiens GN=GSTO1 PE=1 SV=2;>tr|Q5TA02|Q5TA02_HUMAN Glutathione S-transferase omega-1 (Fragment) OS=Homo sapiens GN=GSTO1 PE=1 SV=1	2	2	2	2	2	2	2	2	2	2	2	2	24	188072	136510	204068	183855	135863	135997	152180	200722	75744.3	128554	101435	72981.3		178126	156191	94678.6	428995		1.88138	1.64969		0.00535103	0.0229363
Q00013	>sp|Q00013|EM55_HUMAN 55 kDa erythrocyte membrane protein OS=Homo sapiens GN=MPP1 PE=1 SV=2	38	38	38	38	38	38	38	38	38	38	38	38	456	741339	923242	698633	649001	950104	632573	851368	888547	895560	757747	694066	766014		753054	830648	778347	2.36205e+06		0.967504	1.0672		0.742773	0.547041
Q01518	>sp|Q01518|CAP1_HUMAN Adenylyl cyclase-associated protein 1 OS=Homo sapiens GN=CAP1 PE=1 SV=5	7	7	7	7	7	7	7	7	7	7	7	7	84	152352	109730	113633	177633	130516	130943	114181	140878	66198.1	199876	119429	112811		138337	129129	124579	392045		1.11044	1.03653		0.687165	0.881762
Q04656	>sp|Q04656|ATP7A_HUMAN Copper-transporting ATPase 1 OS=Homo sapiens GN=ATP7A PE=1 SV=3	5	5	5	5	5	5	5	5	5	5	5	5	60	64422.9	149303	136829	103583	142262	61163.1	136359	122329	26530.7	120141	118207	213226		113535	115528	119526	348589		0.949874	0.966553		0.894319	0.929075
Q04760	>sp|Q04760|LGUL_HUMAN Lactoylglutathione lyase OS=Homo sapiens GN=GLO1 PE=1 SV=4	9	9	9	9	9	9	9	9	9	9	9	9	108	229633	233431	191924	198832	147636	114392	214556	131138	234741	219390	224578	235532		213455	151930	228560	593946		0.933911	0.664728		0.254379	0.0375565
Q06323	>sp|Q06323|PSME1_HUMAN Proteasome activator complex subunit 1 OS=Homo sapiens GN=PSME1 PE=1 SV=1	23	23	23	23	23	23	23	23	23	23	23	23	276	224776	222327	305019	296308	265486	246212	225684	289887	253942	215657	221457	224873		262107	256817	228982	747907		1.14466	1.12156		0.240671	0.144831
Q08495	>sp|Q08495|DEMA_HUMAN Dematin OS=Homo sapiens GN=DMTN PE=1 SV=3	49	49	49	49	49	49	49	49	49	49	49	49	588	9659475	13134844	9269574	9535646	12163808	8.18988e+06	10402062	10395535	11085739	9447352	9936268	10869250		1.03999e+07	1.02878e+07	1.03347e+07	3.10224e+07		1.00631	0.995469		0.95078	0.960878
Q09328	>sp|Q09328|MGT5A_HUMAN Alpha-1,6-mannosylglycoprotein 6-beta-N-acetylglucosaminyltransferase A OS=Homo sapiens GN=MGAT5 PE=2 SV=1	2	2	2	2	2	2	2	2	2	2	2	2	24	40630.2	23797.7	29654.6	36516.9	16576.1	34460	16796.3	30432.2	28687.8	43746.9	29177.4	33317.6		32649.8	24566.2	33732.4	90948.4		0.967907	0.728265		0.83908	0.168515
Q13158	>sp|Q13158|FADD_HUMAN FAS-associated death domain protein OS=Homo sapiens GN=FADD PE=1 SV=1	4	4	4	4	4	4	4	4	4	4	4	4	48	15497.7	15917.1	22707.7	18643.8	5202.89	18874.3	16233.2	14797.3	97854.2	22499.9	13617.4	19273.3		18191.6	13776.9	38311.2	70279.7		0.474837	0.359606		0.387646	0.307129
Q13200	>sp|Q13200|PSMD2_HUMAN 26S proteasome non-ATPase regulatory subunit 2 OS=Homo sapiens GN=PSMD2 PE=1 SV=3	21	21	21	21	21	21	21	21	21	21	21	21	252	89097.7	59982.3	70719.1	89837.1	110210	91036.2	80426.6	62141.6	78158	93297.3	74680.1	54794.2		77409.1	85953.6	75232.4	238595		1.02893	1.14251		0.846585	0.435869
Q13228	>sp|Q13228|SBP1_HUMAN Selenium-binding protein 1 OS=Homo sapiens GN=SELENBP1 PE=1 SV=2	47	47	47	47	47	47	47	47	47	47	47	47	564	34997400	34588992	33387772	37142956	38738364	33446788	30907862	40077412	37731264	30499566	34740280	37443656		35029280	3.57926e+07	3.51037e+07	105925578		0.99788	1.01963		0.969734	0.810407
Q13630	>sp|Q13630|FCL_HUMAN GDP-L-fucose synthase OS=Homo sapiens GN=TSTA3 PE=1 SV=1	13	13	13	13	13	13	13	13	13	13	13	13	156	33827.9	34930.8	54044.3	51360.7	50943.5	67185.5	43148.3	31429.5	20944.9	33533.3	38300	22444.6		43540.9	48176.7	28805.7	120523		1.51154	1.67247		0.0756433	0.0772786
Q14974	>sp|Q14974|IMB1_HUMAN Importin subunit beta-1 OS=Homo sapiens GN=KPNB1 PE=1 SV=2	27	27	27	27	27	27	27	27	27	27	27	27	324	38727.1	24989.6	32023.2	35705.7	34902.4	26794.9	26547.5	34936.7	42378.2	29784.6	33005.1	34358.8		32861.4	30795.4	34881.7	98538.5		0.942082	0.882853		0.630944	0.298097
Q14C86	>sp|Q14C86|GAPD1_HUMAN GTPase-activating protein and VPS9 domain-containing protein 1 OS=Homo sapiens GN=GAPVD1 PE=1 SV=2	20	20	20	20	20	20	20	20	20	20	20	20	240	71791.1	86879.6	60883.2	60164.5	75381.5	58399.3	74400.2	69594.3	70643.5	55278.2	27667	74611.8		69929.6	69443.8	57050.1	196424		1.22576	1.21724		0.345898	0.338783
Q15008	>sp|Q15008|PSMD6_HUMAN 26S proteasome non-ATPase regulatory subunit 6 OS=Homo sapiens GN=PSMD6 PE=1 SV=1	8	8	8	8	8	8	8	8	8	8	8	8	96	22775.7	27143.9	15722.6	20229.4	19800.5	19525.1	26143.9	84579.8	21605.6	19405.5	25036.6	20008.4		21467.9	37512.3	21514.1	80494.3		0.997854	1.74362		0.98709	0.385355
Q16401	>sp|Q16401|PSMD5_HUMAN 26S proteasome non-ATPase regulatory subunit 5 OS=Homo sapiens GN=PSMD5 PE=1 SV=3	16	16	16	16	16	16	16	16	16	16	16	16	192	56814.2	48039.7	72783.3	73787.4	66311	58691.4	58162.6	59620.1	59592.6	86777.1	63863.5	70987.3		62856.1	60696.3	70305.1	193858		0.894048	0.863327		0.423344	0.207685
Q4VB86	>tr|Q4VB86|Q4VB86_HUMAN EPB41 protein OS=Homo sapiens GN=EPB41 PE=1 SV=2	29	29	29	29	29	29	29	29	29	29	29	29	348	13913081	18526674	12678625	13230337	16522887	11370026	14629211	15590775	15639628	12430106	14362190	15400513		1.45872e+07	1.45282e+07	1.44581e+07	4.35735e+07		1.00893	1.00485		0.936026	0.960191
Q53FA7	>sp|Q53FA7|QORX_HUMAN Quinone oxidoreductase PIG3 OS=Homo sapiens GN=TP53I3 PE=1 SV=2	4	4	4	4	4	4	4	4	4	4	4	4	48	31393.5	28839.6	24860	25529.6	24507.1	19825.6	21873.9	29599.9	32972.5	27436.9	24753.3	26572.6		27655.7	23951.6	27933.9	79541.2		0.990041	0.857441		0.909064	0.200088
Q5HYB6	>tr|Q5HYB6|Q5HYB6_HUMAN Epididymis luminal protein 189 OS=Homo sapiens GN=DKFZp686J1372 PE=1 SV=1	34	34	34	34	34	34	34	34	34	34	34	34	408	9388251	15133864	9091460	9464018	12601892	10600609	9045017	10920172	9401103	8610674	8.23447e+06	8303440		1.07694e+07	1.07919e+07	8.63742e+06	3.01987e+07		1.24683	1.24944		0.240209	0.0532114
Q5QPM7;Q5QPM9;Q92530	>tr|Q5QPM7|Q5QPM7_HUMAN Proteasome inhibitor PI31 subunit OS=Homo sapiens GN=PSMF1 PE=1 SV=2;>tr|Q5QPM9|Q5QPM9_HUMAN Proteasome inhibitor PI31 subunit (Fragment) OS=Homo sapiens GN=PSMF1 PE=1 SV=1;>sp|Q92530|PSMF1_HUMAN Proteasome inhibitor PI31 subunit OS=Homo sapiens GN=PSMF1 PE=1 SV=2	6	6	6	6	6	6	6	6	6	6	6	6	72	61599.4	53782.9	100243	52978.2	58074.7	45060.4	108238	56592.1	86056.3	109058	66537.5	86633.2		67151	66991.3	87071.3	221214		0.771218	0.769385		0.212498	0.278497
Q5TDH0	>sp|Q5TDH0|DDI2_HUMAN Protein DDI1 homolog 2 OS=Homo sapiens GN=DDI2 PE=1 SV=1	15	15	15	15	15	15	15	15	15	15	15	15	180	498213	584077	481862	459252	555051	452405	516973	545133	541110	471698	498736	315456		505851	517391	456750	1.47999e+06		1.1075	1.13277		0.425324	0.323642
Q5XPI4	>sp|Q5XPI4|RN123_HUMAN E3 ubiquitin-protein ligase RNF123 OS=Homo sapiens GN=RNF123 PE=1 SV=1	22	22	22	22	22	22	22	22	22	22	22	22	264	25642.2	28622.1	49909.7	44262.2	19252.6	44746.9	27400.6	28374	26577.6	50137.1	30760.3	30420		37109.1	29943.6	34473.7	101526		1.07644	0.86859		0.751362	0.56941
Q6B0K9	>sp|Q6B0K9|HBM_HUMAN Hemoglobin subunit mu OS=Homo sapiens GN=HBM PE=2 SV=1	6	6	6	6	6	6	6	6	6	6	6	6	72	7319.56	3876.98	2128.01	17578.8	2753.5	5797.26	3521.48	3145.59	19315.1	5407.42	15083.8	8862.51		7725.84	3804.46	12167.2	23697.5		0.634973	0.312682		0.3769	0.0715384
Q6PK32	>tr|Q6PK32|Q6PK32_HUMAN ANK1 protein OS=Homo sapiens GN=ANK1 PE=1 SV=1	1	1	1	1	1	1	1	1	1	1	1	1	12	175692	277599	162865	168184	216154	154055	206686	210744	199628	156452	181677	178053		196085	196910	178952	571947		1.09574	1.10035		0.585801	0.337282
Q6UWP2	>sp|Q6UWP2|DHR11_HUMAN Dehydrogenase/reductase SDR family member 11 OS=Homo sapiens GN=DHRS11 PE=1 SV=1	5	5	5	5	5	5	5	5	5	5	5	5	60	74276.8	34750.9	62755.8	66749	27433.7	63747.8	34074.4	58695.8	17393.6	18160.6	13583.2	16231.4		59633.1	45987.9	16342.2	121963		3.64903	2.81406		0.0145871	0.0445036
Q86VP6	>sp|Q86VP6|CAND1_HUMAN Cullin-associated NEDD8-dissociated protein 1 OS=Homo sapiens GN=CAND1 PE=1 SV=2	42	42	42	42	42	42	42	42	42	42	42	42	504	191327	240612	212980	226871	247393	228519	174477	244269	131699	203639	188567	120546		217947	223664	161113	602724		1.35276	1.38825		0.0630425	0.0586502
Q8IUE6	>sp|Q8IUE6|H2A2B_HUMAN Histone H2A type 2-B OS=Homo sapiens GN=HIST2H2AB PE=1 SV=3	3	3	3	3	3	3	3	3	3	3	3	3	36	2.95746e+06	1.57796e+06	4.22286e+06	4.01115e+06	2.2078e+06	4.04946e+06	2568699	1.46007e+06	3.32288e+06	4333611	3.66748e+06	3.24004e+06		3.19236e+06	2.57151e+06	3.641e+06	9404869		0.87678	0.706264		0.530671	0.144881
Q8IUI8	>sp|Q8IUI8|CRLF3_HUMAN Cytokine receptor-like factor 3 OS=Homo sapiens GN=CRLF3 PE=1 SV=2	6	6	6	6	6	6	6	6	6	6	6	6	72	8370.42	15052.8	19274.2	10808.6	19067.8	19958	15351.7	33989.6	30074.3	44134.2	12878	32227.6		13376.5	22091.8	29828.5	65296.8		0.448447	0.740626		0.0779517	0.356374
Q8IVF2	>sp|Q8IVF2|AHNK2_HUMAN Protein AHNAK2 OS=Homo sapiens GN=AHNAK2 PE=1 SV=2	4	4	4	4	4	4	4	4	4	4	4	4	48	2.18355e+06	2144870	2.36145e+06	1.55419e+06	1.96887e+06	2.13179e+06	1.56698e+06	2.82309e+06	1.99846e+06	1.66223e+06	1.94814e+06	2.37653e+06		2.06102e+06	2.12268e+06	1.99634e+06	6.18004e+06		1.0324	1.06329		0.787119	0.692361
Q8IZ83	>sp|Q8IZ83|A16A1_HUMAN Aldehyde dehydrogenase family 16 member A1 OS=Homo sapiens GN=ALDH16A1 PE=1 SV=2	9	9	9	9	9	9	9	9	9	9	9	9	108	104113	88123.9	149521	147304	121969	92618.7	116452	163367	132811	123713	168318	152842		122266	123602	144421	390288		0.84659	0.855841		0.28141	0.292027
Q8NCW5	>sp|Q8NCW5|NNRE_HUMAN NAD(P)H-hydrate epimerase OS=Homo sapiens GN=NAXE PE=1 SV=2	4	4	4	4	4	4	4	4	4	4	4	4	48	63822.3	184228	126065	173785	179658	190588	82127.4	195134	197889	155923	174285	162022		136975	161877	172530	471382		0.793921	0.938253		0.29287	0.727499
Q8WUM4	>sp|Q8WUM4|PDC6I_HUMAN Programmed cell death 6-interacting protein OS=Homo sapiens GN=PDCD6IP PE=1 SV=1	31	31	31	31	31	31	31	31	31	31	31	31	372	53783.4	42235.8	52308.6	79738.4	67067.3	69169.1	47540.8	80370.7	66585.8	45762.4	46791.4	56126.6		57016.5	66037	53816.6	176870		1.05946	1.22708		0.746337	0.199809
Q92539	>sp|Q92539|LPIN2_HUMAN Phosphatidate phosphatase LPIN2 OS=Homo sapiens GN=LPIN2 PE=1 SV=1	7	7	7	7	7	7	7	7	7	7	7	7	84	38160.4	202146	139302	148345	231407	151969	160708	14596.4	223563	18526.4	149212	198065		131988	139670	147342	419000		0.895796	0.947933		0.797457	0.908942
Q93008	>sp|Q93008|USP9X_HUMAN Probable ubiquitin carboxyl-terminal hydrolase FAF-X OS=Homo sapiens GN=USP9X PE=1 SV=3	18	18	18	18	18	18	18	18	18	18	18	18	216	28264.1	23795.6	15955.2	24561.3	22634.7	15734.6	15272.2	23521.8	17865.6	14598.2	16362.5	17547.9		23144	19290.8	16593.6	59028.4		1.39476	1.16255		0.0810289	0.314463
Q96A65	>sp|Q96A65|EXOC4_HUMAN Exocyst complex component 4 OS=Homo sapiens GN=EXOC4 PE=1 SV=1	1	1	1	1	1	1	1	1	1	1	1	1	12	63807.2	16688.6	119757	170613	13328.1	41445.1	42817	62584.8	19007.1	54046.5	43873.9	114333		92716.6	40043.7	57815.2	190575		1.60367	0.692617		0.413198	0.472108
Q96CD2	>sp|Q96CD2|COAC_HUMAN Phosphopantothenoylcysteine decarboxylase OS=Homo sapiens GN=PPCDC PE=1 SV=2	8	8	8	8	8	8	8	8	8	8	8	8	96	17210	30339.4	35738.5	28157	22076.7	42238.1	21683.4	41615.2	33937.4	24951.6	47792.3	36200.8		27861.2	31903.4	35720.5	95485.1		0.779978	0.893138		0.246771	0.627752
Q96FJ2	>sp|Q96FJ2|DYL2_HUMAN Dynein light chain 2, cytoplasmic OS=Homo sapiens GN=DYNLL2 PE=1 SV=1	2	2	2	2	2	2	2	2	2	2	2	2	24	309274	376907	305477	331977	416293	299754	328575	451502	336457	312295	335498	341247		330909	374031	331374	1.03631e+06		0.998596	1.12873		0.980251	0.320813
Q99497	>sp|Q99497|PARK7_HUMAN Protein/nucleic acid deglycase DJ-1 OS=Homo sapiens GN=PARK7 PE=1 SV=2	10	10	10	10	10	10	10	10	10	10	10	10	120	85225	98543.4	69740.5	63548.9	99467.8	68201.3	78793.1	89137.6	60289.4	67041.1	60853.7	62111.3		79264.5	83900	62573.9	225738		1.26673	1.34081		0.122652	0.0469729
Q99683	>sp|Q99683|M3K5_HUMAN Mitogen-activated protein kinase kinase kinase 5 OS=Homo sapiens GN=MAP3K5 PE=1 SV=1	1	1	1	1	1	1	1	1	1	1	1	1	12	8562085	8525012	9739168	8271726	8914066	7539731	9712864	10376709	6635705	7113384	6.82849e+06	7.88929e+06		8.7745e+06	9.13584e+06	7.11672e+06	2.50271e+07		1.23294	1.28372		0.00874883	0.0372409
Q99832	>sp|Q99832|TCPH_HUMAN T-complex protein 1 subunit eta OS=Homo sapiens GN=CCT7 PE=1 SV=2	19	19	19	19	19	19	19	19	19	19	19	19	228	71207.2	16156.6	62249.9	81072.3	53551.2	69570.8	73960.5	33461.4	24796	78618.5	50746	21360.9		57671.5	57636	43880.3	159188		1.31429	1.31348		0.507762	0.431351
Q9BRA2	>sp|Q9BRA2|TXD17_HUMAN Thioredoxin domain-containing protein 17 OS=Homo sapiens GN=TXNDC17 PE=1 SV=1	4	4	4	4	4	4	4	4	4	4	4	4	48	63900.3	72398.3	109884	63685.7	135991	106225	123178	122341	110849	96925.9	102883	101582		77467.2	121934	103060	302461		0.751671	1.18313		0.0990406	0.0452996
Q9BRF8	>sp|Q9BRF8|CPPED_HUMAN Serine/threonine-protein phosphatase CPPED1 OS=Homo sapiens GN=CPPED1 PE=1 SV=3	6	6	6	6	6	6	6	6	6	6	6	6	72	116272	108821	79972.2	80927.5	117659	97753.2	104008	142782	90773.3	105354	77877.8	148211		96498.2	115550	105554	317603		0.914205	1.0947		0.635249	0.606851
Q9BSL1	>sp|Q9BSL1|UBAC1_HUMAN Ubiquitin-associated domain-containing protein 1 OS=Homo sapiens GN=UBAC1 PE=1 SV=1	15	15	15	15	15	15	15	15	15	15	15	15	180	205190	159985	197192	177693	101700	201849	166684	165556	193724	175020	187703	205849		185015	158947	190574	534536		0.97083	0.834045		0.662477	0.229203
Q9BVM4	>sp|Q9BVM4|GGACT_HUMAN Gamma-glutamylaminecyclotransferase OS=Homo sapiens GN=GGACT PE=1 SV=2	2	2	2	2	2	2	2	2	2	2	2	2	24	1.30035e+06	1.5703e+06	982768	1.02782e+06	1.66729e+06	899673	1.12533e+06	1.59699e+06	1.27458e+06	1.0356e+06	1.05788e+06	1.1581e+06		1.22031e+06	1.32232e+06	1.13154e+06	3.67417e+06		1.07845	1.1686		0.578175	0.386264
Q9GZT8	>sp|Q9GZT8|NIF3L_HUMAN NIF3-like protein 1 OS=Homo sapiens GN=NIF3L1 PE=1 SV=2	7	7	7	7	7	7	7	7	7	7	7	7	84	423846	478014	537176	459446	511148	379774	411751	894714	442965	369876	560523	419296		474621	549347	448165	1.47213e+06		1.05903	1.22577		0.597486	0.467803
Q9H2M9	>sp|Q9H2M9|RBGPR_HUMAN Rab3 GTPase-activating protein non-catalytic subunit OS=Homo sapiens GN=RAB3GAP2 PE=1 SV=1	2	2	2	2	2	2	2	2	2	2	2	2	24	201598	140258	249973	229383	103063	294883	194332	110840	202592	224996	234536	122272		205303	175779	196099	577181		1.04694	0.896382		0.800911	0.710274
Q9HAB8	>sp|Q9HAB8|PPCS_HUMAN Phosphopantothenate--cysteine ligase OS=Homo sapiens GN=PPCS PE=1 SV=2	4	4	4	4	4	4	4	4	4	4	4	4	48	30459.3	26032.5	29558.2	23799.7	30678.1	22713.4	23333.9	37801.4	9464.5	27721.8	20719.3	35550.9		27462.4	28631.7	23364.2	79458.3		1.17541	1.22545		0.520897	0.458771
Q9NYP9	>sp|Q9NYP9|MS18A_HUMAN Protein Mis18-alpha OS=Homo sapiens GN=MIS18A PE=1 SV=1	1	1	1	1	1	1	1	1	1	1	1	1	12	336136	173536	758219	838933	599576	577337	510241	855001	929098	352989	972779	635918		526706	635539	722696	1.88494e+06		0.728808	0.8794		0.400246	0.617518
Q9NZD4	>sp|Q9NZD4|AHSP_HUMAN Alpha-hemoglobin-stabilizing protein OS=Homo sapiens GN=AHSP PE=1 SV=1	2	2	2	2	2	2	2	2	2	2	2	2	24	23159.2	170856	155021	17146.5	196544	14150.4	49981.3	17575.7	155341	136823	141982	182305		91545.6	69562.8	154113	315221		0.594017	0.451375		0.2287	0.142911
Q9UEY8	>sp|Q9UEY8|ADDG_HUMAN Gamma-adducin OS=Homo sapiens GN=ADD3 PE=1 SV=1	10	10	10	10	10	10	10	10	10	10	10	10	120	30703.7	77020.6	54638.6	67011.9	90483.9	32096	21370.4	28716.8	23415.5	56486.6	21448.6	26737.4		57343.7	43166.8	32022	132533		1.79076	1.34803		0.0999332	0.564372
Q9UIA9	>sp|Q9UIA9|XPO7_HUMAN Exportin-7 OS=Homo sapiens GN=XPO7 PE=1 SV=3	22	22	22	22	22	22	22	22	22	22	22	22	264	27658.8	15534	18378.7	16901.2	27270.4	18743.6	17506.9	16806.1	15499	22576.9	16530.9	13828.1		19618.1	20081.8	17108.7	56808.6		1.14668	1.17377		0.484134	0.374823
Q9UNZ2	>sp|Q9UNZ2|NSF1C_HUMAN NSFL1 cofactor p47 OS=Homo sapiens GN=NSFL1C PE=1 SV=2	16	16	16	16	16	16	16	16	16	16	16	16	192	91841.5	124786	87750.2	96310.8	121374	94306.9	107844	110403	98623.3	96791	103318	94341		100172	108482	98268.4	306923		1.01937	1.10394		0.837794	0.163223
Q9Y315	>sp|Q9Y315|DEOC_HUMAN Deoxyribose-phosphate aldolase OS=Homo sapiens GN=DERA PE=1 SV=2	11	11	11	11	11	11	11	11	11	11	11	11	132	128446	28657.2	32445	105248	33461.7	158823	90572.3	69284.5	58852.7	111097	102033	69206.3		73699	88035.3	85297.4	247032		0.864024	1.0321		0.701366	0.929573
Q9Y3I1	>sp|Q9Y3I1|FBX7_HUMAN F-box only protein 7 OS=Homo sapiens GN=FBXO7 PE=1 SV=1	5	5	5	5	5	5	5	5	5	5	5	5	60	73893.9	39783.9	56480.2	94862	35416.1	56692.4	60308.4	73470.1	138755	75172.9	89206	143741		66255	56471.8	111719	234445		0.593052	0.505482		0.07921	0.0415373
Q9Y4D1	>sp|Q9Y4D1|DAAM1_HUMAN Disheveled-associated activator of morphogenesis 1 OS=Homo sapiens GN=DAAM1 PE=1 SV=2	4	4	4	4	4	4	4	4	4	4	4	4	48	198137	147678	201408	138618	216220	20752.5	35546.6	145475	90993.2	17408.4	121530	16932.7		171460	104499	61716.1	337675		2.77821	1.69322		0.0167871	0.461832
Q9Y4E8	>sp|Q9Y4E8|UBP15_HUMAN Ubiquitin carboxyl-terminal hydrolase 15 OS=Homo sapiens GN=USP15 PE=1 SV=3	14	14	14	14	14	14	14	14	14	14	14	14	168	35327.4	13223.7	21972.9	24534.8	14700	38097.1	13461.2	23631.8	44790.3	22991.1	43403.9	42572.9		23764.7	22472.5	38439.6	84676.8		0.618236	0.584619		0.0778908	0.0832567
transcript=PF3D7_0102200.1	>PF3D7_0102200.1-p1 | transcript=PF3D7_0102200.1 | gene=PF3D7_0102200 | organism=Plasmodium_falciparum_3D7 | gene_product=ring-infected erythrocyte surface antigen | transcript_product=ring-infected erythrocyte surface antigen | location=Pf3D7_01_v3:98819-102282(+) | protein_length=1085 | sequence_SO=chromosome | SO=protein_coding | is_pseudo=false	42	42	42	42	42	42	42	42	42	42	42	42	504	3443422	2.03395e+06	2.9733e+06	2.25144e+06	1.83582e+06	2.80729e+06	3826017	3.93197e+06	2.31679e+06	1.90479e+06	2.03541e+06	4251920		2.67553e+06	3.10027e+06	2.62723e+06	8.40303e+06		1.01839	1.18006		0.942619	0.544759
transcript=PF3D7_0102500.1	>PF3D7_0102500.1-p1 | transcript=PF3D7_0102500.1 | gene=PF3D7_0102500 | organism=Plasmodium_falciparum_3D7 | gene_product=erythrocyte binding antigen-181 | transcript_product=erythrocyte binding antigen-181 | location=Pf3D7_01_v3:110750-115799(-) | protein_length=1567 | sequence_SO=chromosome | SO=protein_coding | is_pseudo=false	68	68	68	68	68	68	68	68	68	68	68	68	816	26863.8	30111.1	34452.3	32247.4	68153.1	36674.9	62929.3	33519	29085.7	52736.2	31163.5	35047.8		30918.6	50319.1	37008.3	118246		0.835451	1.35967		0.347112	0.256647
transcript=PF3D7_0102800.1	>PF3D7_0102800.1-p1 | transcript=PF3D7_0102800.1 | gene=PF3D7_0102800 | organism=Plasmodium_falciparum_3D7 | gene_product=seipin domain-containing protein, putative | transcript_product=seipin domain-containing protein, putative | location=Pf3D7_01_v3:126318-128141(-) | protein_length=607 | sequence_SO=chromosome | SO=protein_coding | is_pseudo=false	3	3	3	3	3	3	3	3	3	3	3	3	36	44892.7	35718.2	28948.8	45449.6	15129.9	33498.5	41161.1	26970.1	23863.4	38381.8	49878.9	25572		38752.4	29189.9	34424	102366		1.12574	0.847952		0.576212	0.547554
transcript=PF3D7_0102900.1	>PF3D7_0102900.1-p1 | transcript=PF3D7_0102900.1 | gene=PF3D7_0102900 | organism=Plasmodium_falciparum_3D7 | gene_product=aspartate--tRNA ligase | transcript_product=aspartate--tRNA ligase | location=Pf3D7_01_v3:128960-130840(-) | protein_length=626 | sequence_SO=chromosome | SO=protein_coding | is_pseudo=false	19	19	19	19	19	19	19	19	19	19	19	19	228	371033	342928	463350	430614	401345	422929	403367	363846	410409	381737	370436	448046		401981	397872	402657	1.20251e+06		0.998322	0.988116		0.984174	0.830151
transcript=PF3D7_0103100.1	>PF3D7_0103100.1-p1 | transcript=PF3D7_0103100.1 | gene=PF3D7_0103100 | organism=Plasmodium_falciparum_3D7 | gene_product=vacuolar protein sorting-associated protein 51, putative | transcript_product=vacuolar protein sorting-associated protein 51, putative | location=Pf3D7_01_v3:134353-139257(-) | protein_length=1634 | sequence_SO=chromosome | SO=protein_coding | is_pseudo=false	4	4	4	4	4	4	4	4	4	4	4	4	48	26834.5	23880.2	24067.8	25687.8	31957	19216.2	24354.4	18031.4	21285.5	19327.2	24364	15705.9		25117.6	23389.7	20170.7	68678		1.24525	1.15959		0.0656425	0.420059
transcript=PF3D7_0103300.1	>PF3D7_0103300.1-p1 | transcript=PF3D7_0103300.1 | gene=PF3D7_0103300 | organism=Plasmodium_falciparum_3D7 | gene_product=conserved protein, unknown function | transcript_product=conserved protein, unknown function | location=Pf3D7_01_v3:143640-146396(-) | protein_length=918 | sequence_SO=chromosome | SO=protein_coding | is_pseudo=false	5	5	5	5	5	5	5	5	5	5	5	5	60	47319.8	53673	38621.3	42980.1	48105	39292	44389.6	44819.9	48056.3	43059.3	49521.4	45974		45648.6	44151.6	46652.7	136453		0.978475	0.946388		0.788268	0.320612
transcript=PF3D7_0103900.1	>PF3D7_0103900.1-p1 | transcript=PF3D7_0103900.1 | gene=PF3D7_0103900 | organism=Plasmodium_falciparum_3D7 | gene_product=parasite-infected erythrocyte surface protein | transcript_product=parasite-infected erythrocyte surface protein | location=Pf3D7_01_v3:172864-174591(+) | protein_length=575 | sequence_SO=chromosome | SO=protein_coding | is_pseudo=false	24	24	24	24	24	24	24	24	24	24	24	24	288	88082	113904	18732.2	27496.3	99568.1	18722.8	79739.9	87381	99199	81771.1	69185.3	97626.3		62053.6	71352.9	86945.4	220352		0.713708	0.820664		0.36888	0.466777
transcript=PF3D7_0104200.1	>PF3D7_0104200.1-p1 | transcript=PF3D7_0104200.1 | gene=PF3D7_0104200 | organism=Plasmodium_falciparum_3D7 | gene_product=StAR-related lipid transfer protein | transcript_product=StAR-related lipid transfer protein | location=Pf3D7_01_v3:182822-184222(-) | protein_length=466 | sequence_SO=chromosome | SO=protein_coding | is_pseudo=false	22	22	22	22	22	22	22	22	22	22	22	22	264	105139	120232	114463	100589	124332	104721	138514	127460	97989.7	98987.1	92248.2	126852		110106	123757	104019	337881		1.05851	1.18975		0.527418	0.10887
transcript=PF3D7_0104300.1	>PF3D7_0104300.1-p1 | transcript=PF3D7_0104300.1 | gene=PF3D7_0104300 | organism=Plasmodium_falciparum_3D7 | gene_product=ubiquitin carboxyl-terminal hydrolase 1, putative | transcript_product=ubiquitin carboxyl-terminal hydrolase 1, putative | location=Pf3D7_01_v3:190269-201230(+) | protein_length=3499 | sequence_SO=chromosome | SO=protein_coding | is_pseudo=false	9	9	9	9	9	9	9	9	9	9	9	9	108	42074.9	100354	84025.4	20688.2	93729.1	52956.3	45633.6	74569.5	84360.8	77820.4	47171.6	77446		61785.6	66722.1	71699.7	200207		0.861728	0.930578		0.64808	0.729952
transcript=PF3D7_0104400.1	>PF3D7_0104400.1-p1 | transcript=PF3D7_0104400.1 | gene=PF3D7_0104400 | organism=Plasmodium_falciparum_3D7 | gene_product=4-hydroxy-3-methylbut-2-enyl diphosphate reductase | transcript_product=4-hydroxy-3-methylbut-2-enyl diphosphate reductase | location=Pf3D7_01_v3:202536-204143(+) | protein_length=535 | sequence_SO=chromosome | SO=protein_coding | is_pseudo=false	6	6	6	6	6	6	6	6	6	6	6	6	72	360328	356498	411693	347002	455295	429475	324122	359094	472091	458485	366774	433303		368880	391997	432663	1.19354e+06		0.85258	0.906008		0.0681984	0.332519
transcript=PF3D7_0104500.1	>PF3D7_0104500.1-p1 | transcript=PF3D7_0104500.1 | gene=PF3D7_0104500 | organism=Plasmodium_falciparum_3D7 | gene_product=conserved protein, unknown function | transcript_product=conserved protein, unknown function | location=Pf3D7_01_v3:204622-205455(-) | protein_length=277 | sequence_SO=chromosome | SO=protein_coding | is_pseudo=false	10	10	10	10	10	10	10	10	10	10	10	10	120	50786.2	41246.7	63207.3	55623.6	40574.4	47261.3	51814.7	49378.2	44438.3	41861	43068.5	35742.9		52715.9	47257.2	41277.7	141251		1.27711	1.14486		0.0831304	0.103018
transcript=PF3D7_0105200.1	>PF3D7_0105200.1-p1 | transcript=PF3D7_0105200.1 | gene=PF3D7_0105200 | organism=Plasmodium_falciparum_3D7 | gene_product=heptatricopeptide repeat and RAP domain-containing protein, putative | transcript_product=heptatricopeptide repeat and RAP domain-containing protein, putative | location=Pf3D7_01_v3:222254-223960(-) | protein_length=568 | sequence_SO=chromosome | SO=protein_coding | is_pseudo=…	24	24	24	24	24	24	24	24	24	24	24	24	288	429331	431028	785872	466210	467289	756794	467467	717857	650793	406897	773979	894831		528110	602352	681625	1.81209e+06		0.774782	0.8837		0.301442	0.567177
transcript=PF3D7_0105800.1	>PF3D7_0105800.1-p1 | transcript=PF3D7_0105800.1 | gene=PF3D7_0105800 | organism=Plasmodium_falciparum_3D7 | gene_product=cyclin-dependent kinases regulatory subunit, putative | transcript_product=cyclin-dependent kinases regulatory subunit, putative | location=Pf3D7_01_v3:249231-252010(-) | protein_length=832 | sequence_SO=chromosome | SO=protein_coding | is_pseudo=false	17	17	17	17	17	17	17	17	17	17	17	17	204	27549.2	30290.2	40708.3	21961.8	27891.8	19174.5	23531.2	49828.6	42164.8	48441.6	37440.5	50667.8		30127.4	30106.5	44678.6	104913		0.674312	0.673846		0.028055	0.119757
transcript=PF3D7_0106100.1	>PF3D7_0106100.1-p1 | transcript=PF3D7_0106100.1 | gene=PF3D7_0106100 | organism=Plasmodium_falciparum_3D7 | gene_product=V-type proton ATPase subunit C, putative | transcript_product=V-type proton ATPase subunit C, putative | location=Pf3D7_01_v3:260658-261809(-) | protein_length=383 | sequence_SO=chromosome | SO=protein_coding | is_pseudo=false	19	19	19	19	19	19	19	19	19	19	19	19	228	23445.6	18503.4	62304.6	88628.8	38323.3	97406.9	18476.2	19684.1	47182	53490.7	40779.4	27395.9		48220.6	43472.6	42212	133905		1.14234	1.02986		0.750972	0.951602
transcript=PF3D7_0106300.1	>PF3D7_0106300.1-p1 | transcript=PF3D7_0106300.1 | gene=PF3D7_0106300 | organism=Plasmodium_falciparum_3D7 | gene_product=calcium-transporting ATPase | transcript_product=calcium-transporting ATPase | location=Pf3D7_01_v3:265208-269173(-) | protein_length=1228 | sequence_SO=chromosome | SO=protein_coding | is_pseudo=false	62	62	62	62	62	62	62	62	62	62	62	62	744	271800	367403	247985	246048	316941	246903	245978	304498	332058	237495	236223	325092		283309	278580	282717	844606		1.00209	0.985367		0.988389	0.903206
transcript=PF3D7_0106400.1	>PF3D7_0106400.1-p1 | transcript=PF3D7_0106400.1 | gene=PF3D7_0106400 | organism=Plasmodium_falciparum_3D7 | gene_product=pre-rRNA-processing protein TSR2, putative | transcript_product=pre-rRNA-processing protein TSR2, putative | location=Pf3D7_01_v3:272454-273404(+) | protein_length=156 | sequence_SO=chromosome | SO=protein_coding | is_pseudo=false	8	8	8	8	8	8	8	8	8	8	8	8	96	365643	438508	338649	330724	448052	334708	385302	427446	342210	326958	335130	340213		368381	398877	336128	1.10339e+06		1.09595	1.18668		0.280888	0.0861721
transcript=PF3D7_0106700.1	>PF3D7_0106700.1-p1 | transcript=PF3D7_0106700.1 | gene=PF3D7_0106700 | organism=Plasmodium_falciparum_3D7 | gene_product=small ribosomal subunit assembling AARP2 protein | transcript_product=small ribosomal subunit assembling AARP2 protein | location=Pf3D7_01_v3:281155-285459(+) | protein_length=1434 | sequence_SO=chromosome | SO=protein_coding | is_pseudo=false	8	8	8	8	8	8	8	8	8	8	8	8	96	57114.6	16641.2	66053.9	38140.7	21877.9	59505.3	60941.4	53725.4	55052.1	47944.1	56005.5	54314.2		44487.6	49012.5	53329	146829		0.83421	0.91906		0.481371	0.673871
transcript=PF3D7_0107000.1	>PF3D7_0107000.1-p1 | transcript=PF3D7_0107000.1 | gene=PF3D7_0107000 | organism=Plasmodium_falciparum_3D7 | gene_product=centrin-1 | transcript_product=centrin-1 | location=Pf3D7_01_v3:293642-294968(+) | protein_length=168 | sequence_SO=chromosome | SO=protein_coding | is_pseudo=false	17	17	17	17	17	17	17	17	17	17	17	17	204	529115	883669	627661	502459	779472	451759	640219	797914	727726	560918	558991	694845		635726	667341	635620	1.93869e+06		1.00017	1.04991		0.999181	0.743659
transcript=PF3D7_0107500.1	>PF3D7_0107500.1-p1 | transcript=PF3D7_0107500.1 | gene=PF3D7_0107500 | organism=Plasmodium_falciparum_3D7 | gene_product=Niemann-Pick type C1-related protein | transcript_product=Niemann-Pick type C1-related protein | location=Pf3D7_01_v3:304362-309257(-) | protein_length=1470 | sequence_SO=chromosome | SO=protein_coding | is_pseudo=false	34	34	34	34	34	34	34	34	34	34	34	34	408	138942	162987	126014	124442	134919	122704	151559	155650	112339	121276	127155	111224		138096	141208	117999	397303		1.17032	1.19669		0.105672	0.0475563
transcript=PF3D7_0108000.1	>PF3D7_0108000.1-p1 | transcript=PF3D7_0108000.1 | gene=PF3D7_0108000 | organism=Plasmodium_falciparum_3D7 | gene_product=proteasome subunit beta type-3, putative | transcript_product=proteasome subunit beta type-3, putative | location=Pf3D7_01_v3:328431-329558(-) | protein_length=218 | sequence_SO=chromosome | SO=protein_coding | is_pseudo=false	6	6	6	6	6	6	6	6	6	6	6	6	72	4.01026e+06	3.1599e+06	4331169	4.17957e+06	3.93779e+06	3.97958e+06	4372751	4.14871e+06	4354171	4015207	4.17325e+06	4493687		3.92022e+06	4.10971e+06	4.25908e+06	1.2289e+07		0.920439	0.964928		0.296632	0.339058
transcript=PF3D7_0108300.1	>PF3D7_0108300.1-p1 | transcript=PF3D7_0108300.1 | gene=PF3D7_0108300 | organism=Plasmodium_falciparum_3D7 | gene_product=conserved Plasmodium protein, unknown function | transcript_product=conserved Plasmodium protein, unknown function | location=Pf3D7_01_v3:337168-343833(+) | protein_length=2221 | sequence_SO=chromosome | SO=protein_coding | is_pseudo=false	71	71	71	71	71	71	71	71	71	71	71	71	852	928504	1.1856e+06	908818	912744	1056914	788075	963343	1.03335e+06	1.03686e+06	769688	893034	902555		983915	960421	900534	2.84487e+06		1.09259	1.0665		0.37488	0.491512
transcript=PF3D7_0108500.1	>PF3D7_0108500.1-p1 | transcript=PF3D7_0108500.1 | gene=PF3D7_0108500 | organism=Plasmodium_falciparum_3D7 | gene_product=conserved Plasmodium protein, unknown function | transcript_product=conserved Plasmodium protein, unknown function | location=Pf3D7_01_v3:349170-349709(+) | protein_length=179 | sequence_SO=chromosome | SO=protein_coding | is_pseudo=false	3	3	3	3	3	3	3	3	3	3	3	3	36	2.92695e+06	3705367	3.18367e+06	2.83428e+06	3403218	3.04773e+06	3.17155e+06	3.73277e+06	2775305	2.60839e+06	2.61875e+06	2603585		3.16257e+06	3.33882e+06	2.65151e+06	9.15289e+06		1.19274	1.25921		0.0765324	0.0161594
transcript=PF3D7_0108700.1	>PF3D7_0108700.1-p1 | transcript=PF3D7_0108700.1 | gene=PF3D7_0108700 | organism=Plasmodium_falciparum_3D7 | gene_product=secreted ookinete protein, putative | transcript_product=secreted ookinete protein, putative | location=Pf3D7_01_v3:352314-356211(-) | protein_length=1152 | sequence_SO=chromosome | SO=protein_coding | is_pseudo=false	29	29	29	29	29	29	29	29	29	29	29	29	348	297778	373310	277417	272093	371823	257051	305580	348737	337211	273307	273978	324878		305149	320798	302343	928291		1.00928	1.06104		0.9258	0.568644
transcript=PF3D7_0109000.1	>PF3D7_0109000.1-p1 | transcript=PF3D7_0109000.1 | gene=PF3D7_0109000 | organism=Plasmodium_falciparum_3D7 | gene_product=photosensitized INA-labeled protein PHIL1 | transcript_product=photosensitized INA-labeled protein PHIL1 | location=Pf3D7_01_v3:363318-363992(+) | protein_length=224 | sequence_SO=chromosome | SO=protein_coding | is_pseudo=false	12	12	12	12	12	12	12	12	12	12	12	12	144	36031.8	36994.9	24613.1	50905	40219.1	24134	35847.3	43448.2	18273.9	31045.7	20149.8	61589.6		37136.2	35912.2	32764.8	105813		1.13342	1.09606		0.71769	0.786368
transcript=PF3D7_0109200.1	>PF3D7_0109200.1-p1 | transcript=PF3D7_0109200.1 | gene=PF3D7_0109200 | organism=Plasmodium_falciparum_3D7 | gene_product=cleavage and polyadenylation specificity factor subunit 5, putative | transcript_product=cleavage and polyadenylation specificity factor subunit 5, putative | location=Pf3D7_01_v3:369480-370178(-) | protein_length=232 | sequence_SO=chromosome | SO=protein_coding | is_pseudo=fa…	4	4	4	4	4	4	4	4	4	4	4	4	48	21749.6	166438	14630.6	164504	98366.6	108143	137271	137326	103445	14980.8	103443	92436.5		91830.6	120277	78576.2	290684		1.16868	1.5307		0.79322	0.147479
transcript=PF3D7_0109400.1	>PF3D7_0109400.1-p1 | transcript=PF3D7_0109400.1 | gene=PF3D7_0109400 | organism=Plasmodium_falciparum_3D7 | gene_product=tubulin-specific chaperone a, putative | transcript_product=tubulin-specific chaperone a, putative | location=Pf3D7_01_v3:374439-375087(-) | protein_length=166 | sequence_SO=chromosome | SO=protein_coding | is_pseudo=false	18	18	18	18	18	18	18	18	18	18	18	18	216	124594	146211	113600	84457	152228	126127	128994	78905.8	200787	150002	106926	185673		117216	121564	160847	399626		0.728739	0.755771		0.135532	0.184944
transcript=PF3D7_0109800.1	>PF3D7_0109800.1-p1 | transcript=PF3D7_0109800.1 | gene=PF3D7_0109800 | organism=Plasmodium_falciparum_3D7 | gene_product=phenylalanine--tRNA ligase alpha subunit | transcript_product=phenylalanine--tRNA ligase alpha subunit | location=Pf3D7_01_v3:380697-382424(+) | protein_length=575 | sequence_SO=chromosome | SO=protein_coding | is_pseudo=false	9	9	9	9	9	9	9	9	9	9	9	9	108	51918.2	21996.8	82527.7	49993.3	46515.5	43943	65550.2	65934.9	34090.6	29211.9	17707.4	70460.7		51609	55485.9	37867.6	144963		1.36288	1.46526		0.445275	0.234551
transcript=PF3D7_0110400.1	>PF3D7_0110400.1-p1 | transcript=PF3D7_0110400.1 | gene=PF3D7_0110400 | organism=Plasmodium_falciparum_3D7 | gene_product=DNA-directed RNA polymerase II subunit RPB9, putative | transcript_product=DNA-directed RNA polymerase II subunit RPB9, putative | location=Pf3D7_01_v3:393875-394835(-) | protein_length=249 | sequence_SO=chromosome | SO=protein_coding | is_pseudo=false	12	12	12	12	12	12	12	12	12	12	12	12	144	174205	236257	157719	175995	212926	149010	184145	199770	145386	171280	191007	111355		186044	186463	154757	527264		1.20217	1.20487		0.246447	0.203091
transcript=PF3D7_0110500.1	>PF3D7_0110500.1-p1 | transcript=PF3D7_0110500.1 | gene=PF3D7_0110500 | organism=Plasmodium_falciparum_3D7 | gene_product=bromodomain protein, putative | transcript_product=bromodomain protein, putative | location=Pf3D7_01_v3:396591-403606(+) | protein_length=2285 | sequence_SO=chromosome | SO=protein_coding | is_pseudo=false	43	43	43	43	43	43	43	43	43	43	43	43	516	156354	202121	136522	138878	198254	139173	172027	194406	145781	144373	138453	139196		158469	175965	141951	476384		1.11637	1.23962		0.357845	0.0858069
transcript=PF3D7_0110600.1	>PF3D7_0110600.1-p1 | transcript=PF3D7_0110600.1 | gene=PF3D7_0110600 | organism=Plasmodium_falciparum_3D7 | gene_product=phosphatidylinositol-4-phosphate 5-kinase | transcript_product=phosphatidylinositol-4-phosphate 5-kinase | location=Pf3D7_01_v3:405739-412169(+) | protein_length=1710 | sequence_SO=chromosome | SO=protein_coding | is_pseudo=false	20	20	20	20	20	20	20	20	20	20	20	20	240	47250.1	109912	44291.6	44909.8	60757.9	42027.4	104302	41681.9	97317.7	82733.7	90987.5	116468		61591	62192.3	96876.6	220660		0.635768	0.641975		0.113699	0.096126
transcript=PF3D7_0110700.1	>PF3D7_0110700.1-p1 | transcript=PF3D7_0110700.1 | gene=PF3D7_0110700 | organism=Plasmodium_falciparum_3D7 | gene_product=chromatin assembly factor 1 protein WD40 domain, putative | transcript_product=chromatin assembly factor 1 protein WD40 domain, putative | location=Pf3D7_01_v3:413760-415100(-) | protein_length=446 | sequence_SO=chromosome | SO=protein_coding | is_pseudo=false	11	11	11	11	11	11	11	11	11	11	11	11	132	734433	694707	658948	696980	746220	652830	749510	897893	682038	593922	642691	596684		696267	761613	628834	2.08671e+06		1.10724	1.21115		0.0445029	0.0726241
transcript=PF3D7_0110800.1	>PF3D7_0110800.1-p1 | transcript=PF3D7_0110800.1 | gene=PF3D7_0110800 | organism=Plasmodium_falciparum_3D7 | gene_product=transcription initiation factor TFIIB, putative | transcript_product=transcription initiation factor TFIIB, putative | location=Pf3D7_01_v3:417921-419607(+) | protein_length=367 | sequence_SO=chromosome | SO=protein_coding | is_pseudo=false	7	7	7	7	7	7	7	7	7	7	7	7	84	150805	223900	151604	180186	224582	153443	304402	303895	178436	149135	218682	226211		176624	246580	193116	616320		0.914598	1.27685		0.532375	0.251366
transcript=PF3D7_0110900.1	>PF3D7_0110900.1-p1 | transcript=PF3D7_0110900.1 | gene=PF3D7_0110900 | organism=Plasmodium_falciparum_3D7 | gene_product=adenylate kinase-like protein 1 | transcript_product=adenylate kinase-like protein 1 | location=Pf3D7_01_v3:420293-420853(-) | protein_length=186 | sequence_SO=chromosome | SO=protein_coding | is_pseudo=false	5	5	5	5	5	5	5	5	5	5	5	5	60	22398.5	13679.1	37550.3	38792	32293.2	24232.1	43596.9	61575	36938.2	34161.1	26951.1	45993.3		28104.9	40424.3	36010.9	104540		0.780457	1.12256		0.323759	0.647564
transcript=PF3D7_0111400.1	>PF3D7_0111400.1-p1 | transcript=PF3D7_0111400.1 | gene=PF3D7_0111400 | organism=Plasmodium_falciparum_3D7 | gene_product=conserved Plasmodium protein, unknown function | transcript_product=conserved Plasmodium protein, unknown function | location=Pf3D7_01_v3:436408-438564(+) | protein_length=718 | sequence_SO=chromosome | SO=protein_coding | is_pseudo=false	22	22	22	22	22	22	22	22	22	22	22	22	264	108460	127039	97325.1	58266.2	41800.8	95946.9	110878	122831	131441	34593.5	110366	111148		97772.6	92864.3	96886.9	287524		1.00914	0.958481		0.973878	0.889973
transcript=PF3D7_0111500.1	>PF3D7_0111500.1-p1 | transcript=PF3D7_0111500.1 | gene=PF3D7_0111500 | organism=Plasmodium_falciparum_3D7 | gene_product=UMP-CMP kinase, putative | transcript_product=UMP-CMP kinase, putative | location=Pf3D7_01_v3:439652-441418(-) | protein_length=371 | sequence_SO=chromosome | SO=protein_coding | is_pseudo=false	12	12	12	12	12	12	12	12	12	12	12	12	144	53428.4	57732.2	159659	158861	85855.7	29789.7	62384.6	205261	137568	130020	135173	140743		107420	95822.6	135876	339119		0.790575	0.705221		0.412512	0.372173
transcript=PF3D7_0112000.1	>PF3D7_0112000.1-p1 | transcript=PF3D7_0112000.1 | gene=PF3D7_0112000 | organism=Plasmodium_falciparum_3D7 | gene_product=TatD-like deoxyribonuclease | transcript_product=TatD-like deoxyribonuclease | location=Pf3D7_01_v3:450831-453118(-) | protein_length=447 | sequence_SO=chromosome | SO=protein_coding | is_pseudo=false	17	17	17	17	17	17	17	17	17	17	17	17	204	45645.3	42795.5	42351	41475.1	46040.7	41694.2	41623.6	18873.1	35001.3	37414	39686.3	84656.6		43066.7	37057.9	49189.5	129314		0.875526	0.75337		0.641889	0.409809
transcript=PF3D7_0112200.1	>PF3D7_0112200.1-p1 | transcript=PF3D7_0112200.1 | gene=PF3D7_0112200 | organism=Plasmodium_falciparum_3D7 | gene_product=multidrug resistance-associated protein 1 | transcript_product=multidrug resistance-associated protein 1 | location=Pf3D7_01_v3:464726-470194(+) | protein_length=1822 | sequence_SO=chromosome | SO=protein_coding | is_pseudo=false	38	38	38	38	38	38	38	38	38	38	38	38	456	60820.8	55731.9	44746.4	59468.1	58602.5	45104.3	63164.2	53621.8	57081.6	51672.1	47074.3	53132.6		55191.8	55123.2	52240.1	162555		1.0565	1.05519		0.514127	0.542351
transcript=PF3D7_0113000.1	>PF3D7_0113000.1-p1 | transcript=PF3D7_0113000.1 | gene=PF3D7_0113000 | organism=Plasmodium_falciparum_3D7 | gene_product=glutamic acid-rich protein GARP | transcript_product=glutamic acid-rich protein GARP | location=Pf3D7_01_v3:487892-490127(-) | protein_length=673 | sequence_SO=chromosome | SO=protein_coding | is_pseudo=false	8	8	8	8	8	8	8	8	8	8	8	8	96	790246	803121	457296	577839	901424	578088	701260	846644	752436	597459	724858	791354		657126	756854	716527	2.13051e+06		0.917098	1.05628		0.559415	0.653186
transcript=PF3D7_0202200.1	>PF3D7_0202200.1-p1 | transcript=PF3D7_0202200.1 | gene=PF3D7_0202200 | organism=Plasmodium_falciparum_3D7 | gene_product=EMP1-trafficking protein | transcript_product=EMP1-trafficking protein | location=Pf3D7_02_v3:112547-113682(-) | protein_length=290 | sequence_SO=chromosome | SO=protein_coding | is_pseudo=false	9	9	9	9	9	9	9	9	9	9	9	9	108	679767	654449	631729	703412	682122	579811	666572	610166	634352	553947	545512	554239		667339	634668	572013	1.87402e+06		1.16665	1.10953		0.0121191	0.0969334
transcript=PF3D7_0202400.1	>PF3D7_0202400.1-p1 | transcript=PF3D7_0202400.1 | gene=PF3D7_0202400 | organism=Plasmodium_falciparum_3D7 | gene_product=translation-enhancing factor | transcript_product=translation-enhancing factor | location=Pf3D7_02_v3:120524-124102(+) | protein_length=1192 | sequence_SO=chromosome | SO=protein_coding | is_pseudo=false	26	26	26	26	26	26	26	26	26	26	26	26	312	508364	671709	373844	376088	598327	408847	517454	496866	574413	422606	452266	541821		482501	505373	497777	1.48565e+06		0.969313	1.01526		0.855392	0.89075
transcript=PF3D7_0202600.1;transcript=PF3D7_0202600.2	>PF3D7_0202600.1-p1 | transcript=PF3D7_0202600.1 | gene=PF3D7_0202600 | organism=Plasmodium_falciparum_3D7 | gene_product=nucleic acid binding protein, putative | transcript_product=nucleic acid binding protein, putative | location=Pf3D7_02_v3:129342-133563(-) | protein_length=1341 | sequence_SO=chromosome | SO=protein_coding | is_pseudo=false;>PF3D7_0202600.2-p1 | transcript=PF3D7_0202600.2 | ge…	14	14	14	14	14	14	14	14	14	14	14	14	168	84816.5	93189.9	83559.6	74157.6	84622	67902.1	84944.8	100948	67359	64996.9	76162.1	46416.3		83930.9	84604.1	63733.6	232269		1.3169	1.32747		0.0405012	0.0640072
transcript=PF3D7_0203000.1	>PF3D7_0203000.1-p1 | transcript=PF3D7_0203000.1 | gene=PF3D7_0203000 | organism=Plasmodium_falciparum_3D7 | gene_product=repetitive organellar protein, putative | transcript_product=repetitive organellar protein, putative | location=Pf3D7_02_v3:141625-147564(-) | protein_length=1979 | sequence_SO=chromosome | SO=protein_coding | is_pseudo=false	21	21	21	21	21	21	21	21	21	21	21	21	252	41375.8	35081.3	41999.9	115608	56581.6	81553.1	123144	87888.9	37478.8	18204	28243.2	39865.2		58516.4	87291.8	30947.8	176756		1.89081	2.82062		0.246447	0.0203129
transcript=PF3D7_0203100.1	>PF3D7_0203100.1-p1 | transcript=PF3D7_0203100.1 | gene=PF3D7_0203100 | organism=Plasmodium_falciparum_3D7 | gene_product=protein kinase, putative | transcript_product=protein kinase, putative | location=Pf3D7_02_v3:149524-156981(-) | protein_length=2485 | sequence_SO=chromosome | SO=protein_coding | is_pseudo=false	2	2	2	2	2	2	2	2	2	2	2	2	24	707334	700152	811740	699547	888901	870544	632250	679081	920462	929635	742220	833532		729693	767694	856462	2.35385e+06		0.851985	0.896355		0.0573424	0.308855
transcript=PF3D7_0203400.1	>PF3D7_0203400.1-p1 | transcript=PF3D7_0203400.1 | gene=PF3D7_0203400 | organism=Plasmodium_falciparum_3D7 | gene_product=conserved Plasmodium protein, unknown function | transcript_product=conserved Plasmodium protein, unknown function | location=Pf3D7_02_v3:162065-162900(-) | protein_length=91 | sequence_SO=chromosome | SO=protein_coding | is_pseudo=false	5	5	5	5	5	5	5	5	5	5	5	5	60	27255.1	27065.8	33852.5	36812.3	34284.8	33193.4	27603.1	20436.8	18082.6	13232	23155.2	100913		31246.4	28879.5	38845.8	98971.7		0.804371	0.743441		0.740022	0.666566
transcript=PF3D7_0204100.1	>PF3D7_0204100.1-p1 | transcript=PF3D7_0204100.1 | gene=PF3D7_0204100 | organism=Plasmodium_falciparum_3D7 | gene_product=Sel1 repeat-containing protein, putative | transcript_product=Sel1 repeat-containing protein, putative | location=Pf3D7_02_v3:182228-189115(-) | protein_length=2295 | sequence_SO=chromosome | SO=protein_coding | is_pseudo=false	46	46	46	46	46	46	46	46	46	46	46	46	552	133543	32388.4	104714	102712	121113	87421.2	107857	118715	140718	103959	102807	108722		93339.1	108777	114051	316167		0.818395	0.95375		0.424136	0.671346
transcript=PF3D7_0204200.1	>PF3D7_0204200.1-p1 | transcript=PF3D7_0204200.1 | gene=PF3D7_0204200 | organism=Plasmodium_falciparum_3D7 | gene_product=conserved Plasmodium protein, unknown function | transcript_product=conserved Plasmodium protein, unknown function | location=Pf3D7_02_v3:192818-194199(+) | protein_length=276 | sequence_SO=chromosome | SO=protein_coding | is_pseudo=false	15	15	15	15	15	15	15	15	15	15	15	15	180	37427.4	252355	26621	27710.4	168186	30731.6	149885	32421.2	36642	175363	28614.9	185171		86028.5	95306	106448	287782		0.808177	0.895332		0.781023	0.850284
transcript=PF3D7_0204500.1	>PF3D7_0204500.1-p1 | transcript=PF3D7_0204500.1 | gene=PF3D7_0204500 | organism=Plasmodium_falciparum_3D7 | gene_product=aspartate transaminase | transcript_product=aspartate transaminase | location=Pf3D7_02_v3:198353-199570(-) | protein_length=405 | sequence_SO=chromosome | SO=protein_coding | is_pseudo=false	6	6	6	6	6	6	6	6	6	6	6	6	72	99034.2	141042	132735	99514.4	67718.2	121787	76926.1	113542	118863	55189.3	140829	111189		118081	94993.4	106518	319592		1.10856	0.891809		0.610566	0.629633
transcript=PF3D7_0204900.1	>PF3D7_0204900.1-p1 | transcript=PF3D7_0204900.1 | gene=PF3D7_0204900 | organism=Plasmodium_falciparum_3D7 | gene_product=2-methoxy-6-polyprenyl-1,4-benzoquinol methylase, mitochondrial, putative | transcript_product=2-methoxy-6-polyprenyl-1,4-benzoquinol methylase, mitochondrial, putative | location=Pf3D7_02_v3:211348-212627(+) | protein_length=354 | sequence_SO=chromosome | SO=protein_coding | …	5	5	5	5	5	5	5	5	5	5	5	5	60	25016.1	41836	31071.6	20911.3	20782.9	30466.7	30073.6	18220.2	4244.82	5251.14	17919.4	14422.5		29708.8	24885.9	10459.5	65054.1		2.84037	2.37927		0.0164804	0.0206945
transcript=PF3D7_0205500.1	>PF3D7_0205500.1-p1 | transcript=PF3D7_0205500.1 | gene=PF3D7_0205500 | organism=Plasmodium_falciparum_3D7 | gene_product=DNA-directed RNA polymerase II 16 kDa subunit, putative | transcript_product=DNA-directed RNA polymerase II 16 kDa subunit, putative | location=Pf3D7_02_v3:225562-226245(-) | protein_length=132 | sequence_SO=chromosome | SO=protein_coding | is_pseudo=false	8	8	8	8	8	8	8	8	8	8	8	8	96	541324	552278	444882	541425	679497	584354	528043	629800	592977	480716	591870	667122		519977	605423	583171	1.70857e+06		0.891637	1.03816		0.22544	0.673495
transcript=PF3D7_0205600.1	>PF3D7_0205600.1-p1 | transcript=PF3D7_0205600.1 | gene=PF3D7_0205600 | organism=Plasmodium_falciparum_3D7 | gene_product=conserved Plasmodium protein, unknown function | transcript_product=conserved Plasmodium protein, unknown function | location=Pf3D7_02_v3:228025-229932(+) | protein_length=635 | sequence_SO=chromosome | SO=protein_coding | is_pseudo=false	2	2	2	2	2	2	2	2	2	2	2	2	24	12978.9	14106.8	23581.5	11068.3	21382.8	12856	3334.19	20749.7	13462.8	62292.8	16489.2	10525.7		15433.9	14580.7	25692.6	55707.1		0.600712	0.567505		0.469173	0.443402
transcript=PF3D7_0205900.1	>PF3D7_0205900.1-p1 | transcript=PF3D7_0205900.1 | gene=PF3D7_0205900 | organism=Plasmodium_falciparum_3D7 | gene_product=26S proteasome regulatory subunit RPN1, putative | transcript_product=26S proteasome regulatory subunit RPN1, putative | location=Pf3D7_02_v3:235237-238816(+) | protein_length=966 | sequence_SO=chromosome | SO=protein_coding | is_pseudo=false	41	41	41	41	41	41	41	41	41	41	41	41	492	280221	251828	381719	241271	314336	323157	263310	215409	255770	238986	186793	307841		288760	279053	247348	815161		1.16743	1.12818		0.349568	0.403733
transcript=PF3D7_0206700.1	>PF3D7_0206700.1-p1 | transcript=PF3D7_0206700.1 | gene=PF3D7_0206700 | organism=Plasmodium_falciparum_3D7 | gene_product=adenylosuccinate lyase | transcript_product=adenylosuccinate lyase | location=Pf3D7_02_v3:271594-273009(+) | protein_length=471 | sequence_SO=chromosome | SO=protein_coding | is_pseudo=false	15	15	15	15	15	15	15	15	15	15	15	15	180	252381	240594	161135	248485	271319	244444	258087	200727	252458	233354	223663	175818		225649	243644	221323	690616		1.01954	1.10085		0.878798	0.35713
transcript=PF3D7_0206800.1	>PF3D7_0206800.1-p1 | transcript=PF3D7_0206800.1 | gene=PF3D7_0206800 | organism=Plasmodium_falciparum_3D7 | gene_product=merozoite surface protein 2 | transcript_product=merozoite surface protein 2 | location=Pf3D7_02_v3:273689-274507(-) | protein_length=272 | sequence_SO=chromosome | SO=protein_coding | is_pseudo=false	7	7	7	7	7	7	7	7	7	7	7	7	84	26182	38505.7	27060.5	22538.4	31790.1	21154	22689.8	25355.4	33844.8	18212.8	25705.9	26542		28571.7	25247.3	26076.4	79895.4		1.09569	0.968208		0.615008	0.841898
transcript=PF3D7_0207400.1	>PF3D7_0207400.1-p1 | transcript=PF3D7_0207400.1 | gene=PF3D7_0207400 | organism=Plasmodium_falciparum_3D7 | gene_product=serine repeat antigen 7 | transcript_product=serine repeat antigen 7 | location=Pf3D7_02_v3:294273-297616(-) | protein_length=946 | sequence_SO=chromosome | SO=protein_coding | is_pseudo=false	18	18	18	18	18	18	18	18	18	18	18	18	216	102514	109786	119463	94495.2	86688.3	69952.6	78437.4	121171	50607.4	124445	108195	117198		106565	89062.2	100112	295738		1.06446	0.889629		0.735175	0.607554
transcript=PF3D7_0207500.1	>PF3D7_0207500.1-p1 | transcript=PF3D7_0207500.1 | gene=PF3D7_0207500 | organism=Plasmodium_falciparum_3D7 | gene_product=serine repeat antigen 6 | transcript_product=serine repeat antigen 6 | location=Pf3D7_02_v3:298897-302564(-) | protein_length=1031 | sequence_SO=chromosome | SO=protein_coding | is_pseudo=false	56	56	56	56	56	56	56	56	56	56	56	56	672	334059	267045	373598	230385	64892.3	268793	285590	305923	264148	305189	297520	370786		301272	231300	309411	841982		0.973696	0.747548		0.843376	0.265838
transcript=PF3D7_0207600.1	>PF3D7_0207600.1-p1 | transcript=PF3D7_0207600.1 | gene=PF3D7_0207600 | organism=Plasmodium_falciparum_3D7 | gene_product=serine repeat antigen 5 | transcript_product=serine repeat antigen 5 | location=Pf3D7_02_v3:303593-307027(-) | protein_length=997 | sequence_SO=chromosome | SO=protein_coding | is_pseudo=false	78	78	78	78	78	78	78	78	78	78	78	78	936	10188067	10432168	9085334	9157174	10495395	7.93866e+06	9512753	11368398	8730984	9410474	7.58752e+06	9478436		9.71569e+06	9.8288e+06	8.80185e+06	2.83463e+07		1.10382	1.11667		0.155994	0.285137
transcript=PF3D7_0207700.1	>PF3D7_0207700.1-p1 | transcript=PF3D7_0207700.1 | gene=PF3D7_0207700 | organism=Plasmodium_falciparum_3D7 | gene_product=serine repeat antigen 4 | transcript_product=serine repeat antigen 4 | location=Pf3D7_02_v3:308847-312155(-) | protein_length=962 | sequence_SO=chromosome | SO=protein_coding | is_pseudo=false	40	40	40	40	40	40	40	40	40	40	40	40	480	391274	392378	454087	437682	365171	426927	405991	631871	452437	390577	425166	390744		418855	457490	414731	1.29108e+06		1.00994	1.1031		0.856759	0.530952
transcript=PF3D7_0207800.1	>PF3D7_0207800.1-p1 | transcript=PF3D7_0207800.1 | gene=PF3D7_0207800 | organism=Plasmodium_falciparum_3D7 | gene_product=serine repeat antigen 3 | transcript_product=serine repeat antigen 3 | location=Pf3D7_02_v3:313449-316741(-) | protein_length=930 | sequence_SO=chromosome | SO=protein_coding | is_pseudo=false	24	24	24	24	24	24	24	24	24	24	24	24	288	173978	212313	177585	174509	219237	158768	195490	253902	149990	161810	146311	140667		184596	206849	149694	541140		1.23316	1.38181		0.0243929	0.0615793
transcript=PF3D7_0208500.1	>PF3D7_0208500.1-p1 | transcript=PF3D7_0208500.1 | gene=PF3D7_0208500 | organism=Plasmodium_falciparum_3D7 | gene_product=acyl carrier protein | transcript_product=acyl carrier protein | location=Pf3D7_02_v3:352836-353628(+) | protein_length=137 | sequence_SO=chromosome | SO=protein_coding | is_pseudo=false	7	7	7	7	7	7	7	7	7	7	7	7	84	1.64051e+06	2062226	1.19008e+06	1.34352e+06	1.70713e+06	1.33505e+06	1.20248e+06	1.90673e+06	1.50566e+06	1.37122e+06	1.54767e+06	1796705		1.55908e+06	1.53785e+06	1.55532e+06	4.65225e+06		1.00242	0.98877		0.986593	0.928919
transcript=PF3D7_0209800.1	>PF3D7_0209800.1-p1 | transcript=PF3D7_0209800.1 | gene=PF3D7_0209800 | organism=Plasmodium_falciparum_3D7 | gene_product=ATP-dependent RNA helicase UAP56 | transcript_product=ATP-dependent RNA helicase UAP56 | location=Pf3D7_02_v3:404281-406355(-) | protein_length=457 | sequence_SO=chromosome | SO=protein_coding | is_pseudo=false	45	45	45	45	45	45	45	45	45	45	45	45	540	1.26122e+06	1.00745e+06	1.07199e+06	1.06294e+06	859794	1.23766e+06	1.04075e+06	1.05429e+06	1252846	1.17094e+06	1.2089e+06	1146296		1.1009e+06	1.04812e+06	1.19475e+06	3.34377e+06		0.921449	0.877276		0.192336	0.152287
transcript=PF3D7_0210100.1	>PF3D7_0210100.1-p1 | transcript=PF3D7_0210100.1 | gene=PF3D7_0210100 | organism=Plasmodium_falciparum_3D7 | gene_product=60S ribosomal protein L37ae, putative | transcript_product=60S ribosomal protein L37ae, putative | location=Pf3D7_02_v3:412275-412859(+) | protein_length=96 | sequence_SO=chromosome | SO=protein_coding | is_pseudo=false	4	4	4	4	4	4	4	4	4	4	4	4	48	1.71289e+06	1.8735e+06	1.71641e+06	1.74562e+06	2.02943e+06	1.84429e+06	1.31997e+06	1.75298e+06	1.67818e+06	1836833	1.51677e+06	1.71441e+06		1.76211e+06	1.73667e+06	1.68655e+06	5.18532e+06		1.0448	1.02972		0.368187	0.774978
transcript=PF3D7_0210200.1	>PF3D7_0210200.1-p1 | transcript=PF3D7_0210200.1 | gene=PF3D7_0210200 | organism=Plasmodium_falciparum_3D7 | gene_product=conserved Plasmodium protein, unknown function | transcript_product=conserved Plasmodium protein, unknown function | location=Pf3D7_02_v3:413278-421137(-) | protein_length=2588 | sequence_SO=chromosome | SO=protein_coding | is_pseudo=false	15	15	15	15	15	15	15	15	15	15	15	15	180	49751	71258	47560.3	41767.2	55175.7	56652.7	65593.2	48047.4	53137.2	45120.5	57746.7	55101.6		52584.1	56367.2	52776.5	161728		0.996355	1.06804		0.979378	0.458978
transcript=PF3D7_0210900.1	>PF3D7_0210900.1-p1 | transcript=PF3D7_0210900.1 | gene=PF3D7_0210900 | organism=Plasmodium_falciparum_3D7 | gene_product=conserved Plasmodium protein, unknown function | transcript_product=conserved Plasmodium protein, unknown function | location=Pf3D7_02_v3:442080-442934(-) | protein_length=284 | sequence_SO=chromosome | SO=protein_coding | is_pseudo=false	13	13	13	13	13	13	13	13	13	13	13	13	156	560105	742979	528673	571486	832389	578156	551348	792162	540781	488434	557057	582711		600811	688514	542246	1.83157e+06		1.108	1.26974		0.324723	0.133426
transcript=PF3D7_0211800.1	>PF3D7_0211800.1-p1 | transcript=PF3D7_0211800.1 | gene=PF3D7_0211800 | organism=Plasmodium_falciparum_3D7 | gene_product=asparagine--tRNA ligase | transcript_product=asparagine--tRNA ligase | location=Pf3D7_02_v3:475242-477074(+) | protein_length=610 | sequence_SO=chromosome | SO=protein_coding | is_pseudo=false	36	36	36	36	36	36	36	36	36	36	36	36	432	472831	334873	397760	460350	306170	328161	426488	411390	386076	436480	483715	391143		416453	368052	424353	1208859		0.981383	0.867325		0.847231	0.188172
transcript=PF3D7_0212100.1	>PF3D7_0212100.1-p1 | transcript=PF3D7_0212100.1 | gene=PF3D7_0212100 | organism=Plasmodium_falciparum_3D7 | gene_product=conserved Plasmodium protein, unknown function | transcript_product=conserved Plasmodium protein, unknown function | location=Pf3D7_02_v3:483436-488970(+) | protein_length=1844 | sequence_SO=chromosome | SO=protein_coding | is_pseudo=false	29	29	29	29	29	29	29	29	29	29	29	29	348	113633	139552	116969	120908	128470	103884	96728.5	104247	122235	106907	111737	89525		122765	108332	107601	338699		1.14093	1.0068		0.142357	0.942516
transcript=PF3D7_0212300.1	>PF3D7_0212300.1-p1 | transcript=PF3D7_0212300.1 | gene=PF3D7_0212300 | organism=Plasmodium_falciparum_3D7 | gene_product=peptide chain release factor subunit 1, putative | transcript_product=peptide chain release factor subunit 1, putative | location=Pf3D7_02_v3:492616-494306(+) | protein_length=427 | sequence_SO=chromosome | SO=protein_coding | is_pseudo=false	21	21	21	21	21	21	21	21	21	21	21	21	252	117692	116826	90096.9	116179	94209	34971.8	96765.2	81546.3	75603.5	99194.2	95377.1	134888		110198	76873.1	101266	288337		1.08821	0.759122		0.554936	0.246097
transcript=PF3D7_0212400.1	>PF3D7_0212400.1-p1 | transcript=PF3D7_0212400.1 | gene=PF3D7_0212400 | organism=Plasmodium_falciparum_3D7 | gene_product=conserved Plasmodium membrane protein, unknown function | transcript_product=conserved Plasmodium membrane protein, unknown function | location=Pf3D7_02_v3:495166-507854(-) | protein_length=4091 | sequence_SO=chromosome | SO=protein_coding | is_pseudo=false	27	27	27	27	27	27	27	27	27	27	27	27	324	190218	225639	202590	173413	155601	204055	194698	146312	191879	190122	205892	190831		197965	175167	194681	567813		1.01687	0.899763		0.792527	0.266675
transcript=PF3D7_0212500.1	>PF3D7_0212500.1-p1 | transcript=PF3D7_0212500.1 | gene=PF3D7_0212500 | organism=Plasmodium_falciparum_3D7 | gene_product=conserved Plasmodium protein, unknown function | transcript_product=conserved Plasmodium protein, unknown function | location=Pf3D7_02_v3:509525-521746(+) | protein_length=3990 | sequence_SO=chromosome | SO=protein_coding | is_pseudo=false	40	40	40	40	40	40	40	40	40	40	40	40	480	133576	316885	203493	176515	259863	244527	197874	261451	282526	201129	173933	243883		207617	240929	225368	673913		0.921237	1.06905		0.714821	0.603764
transcript=PF3D7_0212900.1	>PF3D7_0212900.1-p1 | transcript=PF3D7_0212900.1 | gene=PF3D7_0212900 | organism=Plasmodium_falciparum_3D7 | gene_product=arginyl-tRNA--protein transferase | transcript_product=arginyl-tRNA--protein transferase | location=Pf3D7_02_v3:533253-534350(+) | protein_length=365 | sequence_SO=chromosome | SO=protein_coding | is_pseudo=false	9	9	9	9	9	9	9	9	9	9	9	9	108	124811	164726	122841	125751	131910	122168	104048	116372	121356	118770	118027	109938		134532	118624	117023	370179		1.14962	1.01369		0.180421	0.812362
transcript=PF3D7_0213100.1	>PF3D7_0213100.1-p1 | transcript=PF3D7_0213100.1 | gene=PF3D7_0213100 | organism=Plasmodium_falciparum_3D7 | gene_product=protein SIS1 | transcript_product=protein SIS1 | location=Pf3D7_02_v3:537789-539420(+) | protein_length=328 | sequence_SO=chromosome | SO=protein_coding | is_pseudo=false	19	19	19	19	19	19	19	19	19	19	19	19	228	5666177	8199082	6.07971e+06	5398148	6251433	5.04499e+06	5987430	6.15714e+06	6.24273e+06	5.24885e+06	5488682	6214862		6.33578e+06	5860248	5798783	1.79948e+07		1.09261	1.0106		0.477793	0.87535
transcript=PF3D7_0213500.1	>PF3D7_0213500.1-p1 | transcript=PF3D7_0213500.1 | gene=PF3D7_0213500 | organism=Plasmodium_falciparum_3D7 | gene_product=tetratricopeptide repeat protein, putative | transcript_product=tetratricopeptide repeat protein, putative | location=Pf3D7_02_v3:543802-545895(-) | protein_length=460 | sequence_SO=chromosome | SO=protein_coding | is_pseudo=false	3	3	3	3	3	3	3	3	3	3	3	3	36	41944.9	106518	75824.6	69297.5	94933	79458.1	91720.6	72083.1	107588	78377.3	79380.5	99824.5		73396.2	84548.7	91292.7	249238		0.803966	0.926128		0.29412	0.48792
transcript=PF3D7_0213700.1	>PF3D7_0213700.1-p1 | transcript=PF3D7_0213700.1 | gene=PF3D7_0213700 | organism=Plasmodium_falciparum_3D7 | gene_product=conserved protein, unknown function | transcript_product=conserved protein, unknown function | location=Pf3D7_02_v3:557048-557696(+) | protein_length=154 | sequence_SO=chromosome | SO=protein_coding | is_pseudo=false	10	10	10	10	10	10	10	10	10	10	10	10	120	761608	898002	482279	487523	799046	608924	682643	776496	797638	719055	668984	820103		657353	716777	751445	2.12557e+06		0.874785	0.953865		0.441233	0.560709
transcript=PF3D7_0214000.1	>PF3D7_0214000.1-p1 | transcript=PF3D7_0214000.1 | gene=PF3D7_0214000 | organism=Plasmodium_falciparum_3D7 | gene_product=T-complex protein 1 subunit theta | transcript_product=T-complex protein 1 subunit theta | location=Pf3D7_02_v3:566121-567894(+) | protein_length=542 | sequence_SO=chromosome | SO=protein_coding | is_pseudo=false	30	30	30	30	30	30	30	30	30	30	30	30	360	361446	174280	411301	407150	303077	383372	316204	199059	314600	436334	406060	301776		338544	300428	364693	1.00366e+06		0.928301	0.823784		0.704778	0.251881
transcript=PF3D7_0214100.1	>PF3D7_0214100.1-p1 | transcript=PF3D7_0214100.1 | gene=PF3D7_0214100 | organism=Plasmodium_falciparum_3D7 | gene_product=protein transport protein SEC31 | transcript_product=protein transport protein SEC31 | location=Pf3D7_02_v3:568529-573315(-) | protein_length=1471 | sequence_SO=chromosome | SO=protein_coding | is_pseudo=false	34	34	34	34	34	34	34	34	34	34	34	34	408	1.12857e+06	1.32636e+06	1.2117e+06	1.04075e+06	1306326	1.14714e+06	1.14979e+06	1.41078e+06	1.2789e+06	1.01319e+06	1.13403e+06	1.26892e+06		1.17685e+06	1.25351e+06	1.17376e+06	3.60412e+06		1.00263	1.06794		0.97302	0.409373
transcript=PF3D7_0214400.1	>PF3D7_0214400.1-p1 | transcript=PF3D7_0214400.1 | gene=PF3D7_0214400 | organism=Plasmodium_falciparum_3D7 | gene_product=conserved protein, unknown function | transcript_product=conserved protein, unknown function | location=Pf3D7_02_v3:586765-589051(-) | protein_length=619 | sequence_SO=chromosome | SO=protein_coding | is_pseudo=false	8	8	8	8	8	8	8	8	8	8	8	8	96	247424	376274	223903	237428	339779	253321	215649	244110	238923	226025	184619	254211		271257	263215	225945	760416		1.20055	1.16495		0.302374	0.281273
transcript=PF3D7_0215100.1	>PF3D7_0215100.1-p1 | transcript=PF3D7_0215100.1 | gene=PF3D7_0215100 | organism=Plasmodium_falciparum_3D7 | gene_product=RING zinc finger protein, putative | transcript_product=RING zinc finger protein, putative | location=Pf3D7_02_v3:622524-624306(-) | protein_length=298 | sequence_SO=chromosome | SO=protein_coding | is_pseudo=false	2	2	2	2	2	2	2	2	2	2	2	2	24	34040.2	33264.5	24068.6	26133.5	57400	48812.5	37592.7	49788.8	27908.5	33880.9	39894.6	27228.7		29376.7	48398.5	32228.2	110003		0.911522	1.50174		0.490892	0.0209625
transcript=PF3D7_0215500.1	>PF3D7_0215500.1-p1 | transcript=PF3D7_0215500.1 | gene=PF3D7_0215500 | organism=Plasmodium_falciparum_3D7 | gene_product=conserved Plasmodium protein, unknown function | transcript_product=conserved Plasmodium protein, unknown function | location=Pf3D7_02_v3:640400-642694(+) | protein_length=764 | sequence_SO=chromosome | SO=protein_coding | is_pseudo=false	3	3	3	3	3	3	3	3	3	3	3	3	36	40640.9	21269.7	89927.7	76765.4	42844.5	35370.7	63378.1	68977.9	32141.4	51722.4	62750	27001.2		57150.9	52642.8	43403.8	153197		1.31673	1.21286		0.481159	0.456294
transcript=PF3D7_0215700.1	>PF3D7_0215700.1-p1 | transcript=PF3D7_0215700.1 | gene=PF3D7_0215700 | organism=Plasmodium_falciparum_3D7 | gene_product=DNA-directed RNA polymerase II subunit RPB2, putative | transcript_product=DNA-directed RNA polymerase II subunit RPB2, putative | location=Pf3D7_02_v3:645929-650085(+) | protein_length=1340 | sequence_SO=chromosome | SO=protein_coding | is_pseudo=false	57	57	57	57	57	57	57	57	57	57	57	57	684	126211	143648	120601	124772	142295	126711	130608	104123	143529	134771	131805	130809		128808	125934	135229	389971		0.952521	0.931269		0.325017	0.338849
transcript=PF3D7_0215800.1	>PF3D7_0215800.1-p1 | transcript=PF3D7_0215800.1 | gene=PF3D7_0215800 | organism=Plasmodium_falciparum_3D7 | gene_product=origin recognition complex subunit 5 | transcript_product=origin recognition complex subunit 5 | location=Pf3D7_02_v3:650663-653362(-) | protein_length=899 | sequence_SO=chromosome | SO=protein_coding | is_pseudo=false	6	6	6	6	6	6	6	6	6	6	6	6	72	55527.5	45154.2	28042.2	35917.7	69645.8	22609.1	59971.7	53485.4	77505.5	40751.3	48296.3	69546		41160.4	51428	59024.8	151613		0.697341	0.871295		0.146269	0.590661
transcript=PF3D7_0217100.1	>PF3D7_0217100.1-p1 | transcript=PF3D7_0217100.1 | gene=PF3D7_0217100 | organism=Plasmodium_falciparum_3D7 | gene_product=ATP synthase subunit alpha, mitochondrial | transcript_product=ATP synthase subunit alpha, mitochondrial | location=Pf3D7_02_v3:707738-709393(+) | protein_length=551 | sequence_SO=chromosome | SO=protein_coding | is_pseudo=false	25	25	25	25	25	25	25	25	25	25	25	25	300	122105	88847.3	104043	97655.7	100465	84009.6	101646	134461	102510	72524.4	91153.2	95238.3		103163	105145	90356.5	298665		1.14173	1.16367		0.227125	0.285466
transcript=PF3D7_0217500.1	>PF3D7_0217500.1-p1 | transcript=PF3D7_0217500.1 | gene=PF3D7_0217500 | organism=Plasmodium_falciparum_3D7 | gene_product=calcium-dependent protein kinase 1 | transcript_product=calcium-dependent protein kinase 1 | location=Pf3D7_02_v3:720437-722661(+) | protein_length=524 | sequence_SO=chromosome | SO=protein_coding | is_pseudo=false	28	28	28	28	28	28	28	28	28	28	28	28	336	1286386	1.67057e+06	1.30903e+06	1.28509e+06	1.43299e+06	1.11448e+06	1.19728e+06	1.615e+06	1.05442e+06	1.33478e+06	1.42924e+06	1248770		1387771	1.33994e+06	1.2668e+06	3.99451e+06		1.09549	1.05773		0.366655	0.61982
transcript=PF3D7_0217800.1	>PF3D7_0217800.1-p1 | transcript=PF3D7_0217800.1 | gene=PF3D7_0217800 | organism=Plasmodium_falciparum_3D7 | gene_product=40S ribosomal protein S26 | transcript_product=40S ribosomal protein S26 | location=Pf3D7_02_v3:734272-734595(+) | protein_length=107 | sequence_SO=chromosome | SO=protein_coding | is_pseudo=false	7	7	7	7	7	7	7	7	7	7	7	7	84	1.43719e+06	1.57992e+06	822138	894532	1.451e+06	1.0595e+06	1.38711e+06	1.37492e+06	1.28339e+06	1.31753e+06	1.15003e+06	1.34812e+06		1.18344e+06	1.31813e+06	1.27477e+06	3.77634e+06		0.928361	1.03402		0.669361	0.679209
transcript=PF3D7_0217900.1	>PF3D7_0217900.1-p1 | transcript=PF3D7_0217900.1 | gene=PF3D7_0217900 | organism=Plasmodium_falciparum_3D7 | gene_product=conserved Plasmodium protein, unknown function | transcript_product=conserved Plasmodium protein, unknown function | location=Pf3D7_02_v3:735438-736997(-) | protein_length=519 | sequence_SO=chromosome | SO=protein_coding | is_pseudo=false	14	14	14	14	14	14	14	14	14	14	14	14	168	88339	116208	96335.8	100695	115161	101326	96455.1	102999	110660	102695	93060.9	111503		100394	103985	104480	308859		0.9609	0.995268		0.595971	0.935414
transcript=PF3D7_0218000.1	>PF3D7_0218000.1-p1 | transcript=PF3D7_0218000.1 | gene=PF3D7_0218000 | organism=Plasmodium_falciparum_3D7 | gene_product=replication factor C subunit 2, putative | transcript_product=replication factor C subunit 2, putative | location=Pf3D7_02_v3:738860-739852(+) | protein_length=330 | sequence_SO=chromosome | SO=protein_coding | is_pseudo=false	30	30	30	30	30	30	30	30	30	30	30	30	360	23237.9	27204.2	33860.9	36140.8	23049.1	51514.6	41108.2	39396.9	22460.1	25593.8	44375.2	32657.3		30110.9	38767.2	31271.6	100150		0.962885	1.23969		0.84667	0.365242
transcript=PF3D7_0218200.1	>PF3D7_0218200.1-p1 | transcript=PF3D7_0218200.1 | gene=PF3D7_0218200 | organism=Plasmodium_falciparum_3D7 | gene_product=SUZ domain-containing protein, putative | transcript_product=SUZ domain-containing protein, putative | location=Pf3D7_02_v3:743289-745712(-) | protein_length=807 | sequence_SO=chromosome | SO=protein_coding | is_pseudo=false	8	8	8	8	8	8	8	8	8	8	8	8	96	164696	218041	175878	167816	226901	164291	179677	220545	174836	153135	168905	180736		181608	197853	169403	548864		1.07205	1.16795		0.420598	0.16052
transcript=PF3D7_0218500.1	>PF3D7_0218500.1-p1 | transcript=PF3D7_0218500.1 | gene=PF3D7_0218500 | organism=Plasmodium_falciparum_3D7 | gene_product=small nuclear ribonucleoprotein Sm D2, putative | transcript_product=small nuclear ribonucleoprotein Sm D2, putative | location=Pf3D7_02_v3:752966-753439(+) | protein_length=101 | sequence_SO=chromosome | SO=protein_coding | is_pseudo=false	6	6	6	6	6	6	6	6	6	6	6	6	72	1374912	1.82692e+06	1.61518e+06	1.56233e+06	1.67377e+06	1.39696e+06	1.67813e+06	1911061	1.63942e+06	1475133	1.57764e+06	1.84833e+06		1.59483e+06	1.66498e+06	1.63513e+06	4.89494e+06		0.975355	1.01825		0.752338	0.828372
transcript=PF3D7_0218600.1	>PF3D7_0218600.1-p1 | transcript=PF3D7_0218600.1 | gene=PF3D7_0218600 | organism=Plasmodium_falciparum_3D7 | gene_product=patatin-like phospholipase, putative | transcript_product=patatin-like phospholipase, putative | location=Pf3D7_02_v3:755418-762560(+) | protein_length=2380 | sequence_SO=chromosome | SO=protein_coding | is_pseudo=false	3	3	3	3	3	3	3	3	3	3	3	3	36	7170.08	20715.8	35609.6	10536.2	16353.8	36316.6	20312.4	27435.2	6216.76	30464.6	24214.3	5112.74		18507.9	25104.5	16502.1	60114.5		1.12155	1.52129		0.831658	0.314663
transcript=PF3D7_0218700.1	>PF3D7_0218700.1-p1 | transcript=PF3D7_0218700.1 | gene=PF3D7_0218700 | organism=Plasmodium_falciparum_3D7 | gene_product=pre-mRNA-processing protein 45, putative | transcript_product=pre-mRNA-processing protein 45, putative | location=Pf3D7_02_v3:763491-765191(-) | protein_length=482 | sequence_SO=chromosome | SO=protein_coding | is_pseudo=false	9	9	9	9	9	9	9	9	9	9	9	9	108	20372.6	17374.2	22885.5	19920	23075.1	18392	21863.4	16812.2	16580.3	47686.4	46912.6	16945.8		20138.1	20035.7	32031.3	72205		0.628701	0.625504		0.270627	0.267699
transcript=PF3D7_0219400.1	>PF3D7_0219400.1-p1 | transcript=PF3D7_0219400.1 | gene=PF3D7_0219400 | organism=Plasmodium_falciparum_3D7 | gene_product=ribosome associated membrane protein RAMP4, putative, unspecified product | transcript_product=ribosome associated membrane protein RAMP4, putative | location=Pf3D7_02_v3:774815-776036(+) | protein_length=101 | sequence_SO=chromosome | SO=protein_coding | is_pseudo=false	11	11	11	11	11	11	11	11	11	11	11	11	132	699238	776136	451804	526100	703149	71345	129462	727889	741780	577083	613826	687145		613319	407961	654959	1.67624e+06		0.936425	0.622881		0.642559	0.26075
transcript=PF3D7_0219600.1	>PF3D7_0219600.1-p1 | transcript=PF3D7_0219600.1 | gene=PF3D7_0219600 | organism=Plasmodium_falciparum_3D7 | gene_product=replication factor C subunit 1, putative | transcript_product=replication factor C subunit 1, putative | location=Pf3D7_02_v3:779418-782132(-) | protein_length=904 | sequence_SO=chromosome | SO=protein_coding | is_pseudo=false	25	25	25	25	25	25	25	25	25	25	25	25	300	522797	588541	465556	476830	568890	403254	537040	669941	490409	481181	451860	584240		513431	544781	501923	1.56013e+06		1.02293	1.08539		0.783288	0.523543
transcript=PF3D7_0220000.1	>PF3D7_0220000.1-p1 | transcript=PF3D7_0220000.1 | gene=PF3D7_0220000 | organism=Plasmodium_falciparum_3D7 | gene_product=liver stage antigen 3 | transcript_product=liver stage antigen 3 | location=Pf3D7_02_v3:796752-801586(+) | protein_length=1558 | sequence_SO=chromosome | SO=protein_coding | is_pseudo=false	64	64	64	64	64	64	64	64	64	64	64	64	768	6.87598e+06	7631637	7045448	6.62019e+06	7215170	5.89447e+06	8.26271e+06	6.7244e+06	5987917	5581634	6011240	5835240		7.04331e+06	7.02419e+06	5.85401e+06	1.99215e+07		1.20316	1.19989		0.00636689	0.096638
transcript=PF3D7_0220100.1	>PF3D7_0220100.1-p1 | transcript=PF3D7_0220100.1 | gene=PF3D7_0220100 | organism=Plasmodium_falciparum_3D7 | gene_product=DnaJ protein, putative | transcript_product=DnaJ protein, putative | location=Pf3D7_02_v3:804520-807741(+) | protein_length=997 | sequence_SO=chromosome | SO=protein_coding | is_pseudo=false	10	10	10	10	10	10	10	10	10	10	10	10	120	86723.7	126122	98132.3	90803	105811	86020.7	108243	113497	95745.9	101861	102930	92857.5		100445	103393	98348.6	302187		1.02132	1.05129		0.832647	0.480165
transcript=PF3D7_0220600.1	>PF3D7_0220600.1-p1 | transcript=PF3D7_0220600.1 | gene=PF3D7_0220600 | organism=Plasmodium_falciparum_3D7 | gene_product=Plasmodium exported protein (hyp9), unknown function | transcript_product=Plasmodium exported protein (hyp9), unknown function | location=Pf3D7_02_v3:831189-832005(+) | protein_length=225 | sequence_SO=chromosome | SO=protein_coding | is_pseudo=false	11	11	11	11	11	11	11	11	11	11	11	11	132	373793	397981	384652	233026	410827	351365	540219	470078	387071	307742	300202	715185		347363	443122	427550	1.21804e+06		0.81245	1.03642		0.489161	0.890211
transcript=PF3D7_0301400.1	>PF3D7_0301400.1-p1 | transcript=PF3D7_0301400.1 | gene=PF3D7_0301400 | organism=Plasmodium_falciparum_3D7 | gene_product=Plasmodium exported protein, unknown function | transcript_product=Plasmodium exported protein, unknown function | location=Pf3D7_03_v3:85305-86131(-) | protein_length=243 | sequence_SO=chromosome | SO=protein_coding | is_pseudo=false	3	3	3	3	3	3	3	3	3	3	3	3	36	191012	256724	166608	168770	203111	189706	204512	206126	185862	171853	178067	176921		195779	200864	178176	574818		1.0988	1.12734		0.466155	0.00366653
transcript=PF3D7_0301600.1	>PF3D7_0301600.1-p1 | transcript=PF3D7_0301600.1 | gene=PF3D7_0301600 | organism=Plasmodium_falciparum_3D7 | gene_product=Plasmodium exported protein (hyp1), unknown function | transcript_product=Plasmodium exported protein (hyp1), unknown function | location=Pf3D7_03_v3:91115-93463(-) | protein_length=732 | sequence_SO=chromosome | SO=protein_coding | is_pseudo=false	11	11	11	11	11	11	11	11	11	11	11	11	132	278427	343949	261790	228004	353222	227095	297100	290386	302656	254883	229608	339019		278043	291951	281541	851535		0.987573	1.03697		0.922487	0.779426
transcript=PF3D7_0301700.1	>PF3D7_0301700.1-p1 | transcript=PF3D7_0301700.1 | gene=PF3D7_0301700 | organism=Plasmodium_falciparum_3D7 | gene_product=Plasmodium exported protein, unknown function | transcript_product=Plasmodium exported protein, unknown function | location=Pf3D7_03_v3:96568-97907(-) | protein_length=317 | sequence_SO=chromosome | SO=protein_coding | is_pseudo=false	8	8	8	8	8	8	8	8	8	8	8	8	96	1.84491e+06	2.52185e+06	1.88863e+06	1.88855e+06	2129167	1.77204e+06	1.39395e+06	2.77619e+06	1.32714e+06	1.58236e+06	1.54443e+06	1968778		2.03598e+06	2.01784e+06	1.60568e+06	5.6595e+06		1.26799	1.25669		0.0882308	0.267971
transcript=PF3D7_0302000.1	>PF3D7_0302000.1-p1 | transcript=PF3D7_0302000.1 | gene=PF3D7_0302000 | organism=Plasmodium_falciparum_3D7 | gene_product=pre-mRNA-splicing factor PRP46, putative | transcript_product=pre-mRNA-splicing factor PRP46, putative | location=Pf3D7_03_v3:107961-109880(-) | protein_length=600 | sequence_SO=chromosome | SO=protein_coding | is_pseudo=false	12	12	12	12	12	12	12	12	12	12	12	12	144	461262	59302.7	375550	442126	634232	57183.1	522168	481099	67250.2	483156	486796	61981.8		334560	423670	274796	1.03303e+06		1.21749	1.54176		0.710846	0.428137
transcript=PF3D7_0302100.1	>PF3D7_0302100.1-p1 | transcript=PF3D7_0302100.1 | gene=PF3D7_0302100 | organism=Plasmodium_falciparum_3D7 | gene_product=serine/threonine protein kinase | transcript_product=serine/threonine protein kinase | location=Pf3D7_03_v3:114070-118086(+) | protein_length=1338 | sequence_SO=chromosome | SO=protein_coding | is_pseudo=false	21	21	21	21	21	21	21	21	21	21	21	21	252	21754.1	21087.7	41044.8	45699.1	24532.2	21418.8	26321.5	21396.9	21828.4	20732.4	38588.1	21544.9		32396.4	23417.3	25673.4	81487.2		1.26186	0.912122		0.422067	0.644727
transcript=PF3D7_0302500.1	>PF3D7_0302500.1-p1 | transcript=PF3D7_0302500.1 | gene=PF3D7_0302500 | organism=Plasmodium_falciparum_3D7 | gene_product=cytoadherence linked asexual protein 3.1 | transcript_product=cytoadherence linked asexual protein 3.1 | location=Pf3D7_03_v3:135418-140660(+) | protein_length=1417 | sequence_SO=chromosome | SO=protein_coding | is_pseudo=false	32	32	32	32	32	32	32	32	32	32	32	32	384	92677.6	36262.4	135026	125643	55461.7	117792	117127	44085.3	95323.6	144826	87671.6	79622.3		97402.3	83616.5	101861	282880		0.95623	0.82089		0.873724	0.487604
transcript=PF3D7_0302800.1	>PF3D7_0302800.1-p1 | transcript=PF3D7_0302800.1 | gene=PF3D7_0302800 | organism=Plasmodium_falciparum_3D7 | gene_product=RNA-binding protein, putative | transcript_product=RNA-binding protein, putative | location=Pf3D7_03_v3:148046-149305(-) | protein_length=419 | sequence_SO=chromosome | SO=protein_coding | is_pseudo=false	11	11	11	11	11	11	11	11	11	11	11	11	132	367479	563337	407693	568706	143071	366536	446480	506519	488765	343040	444873	607007		476804	365651	470921	1.31338e+06		1.01249	0.77646		0.940491	0.322354
transcript=PF3D7_0302900.1	>PF3D7_0302900.1-p1 | transcript=PF3D7_0302900.1 | gene=PF3D7_0302900 | organism=Plasmodium_falciparum_3D7 | gene_product=exportin-1, putative | transcript_product=exportin-1, putative | location=Pf3D7_03_v3:152168-156146(-) | protein_length=1254 | sequence_SO=chromosome | SO=protein_coding | is_pseudo=false	49	49	49	49	49	49	49	49	49	49	49	49	588	55818.2	184345	132786	103241	95223.4	72031	92253.1	89104.2	77654.1	142522	130498	80272		119048	87152.9	107737	313937		1.10499	0.808945		0.736014	0.313999
transcript=PF3D7_0303000.1	>PF3D7_0303000.1-p1 | transcript=PF3D7_0303000.1 | gene=PF3D7_0303000 | organism=Plasmodium_falciparum_3D7 | gene_product=N-ethylmaleimide-sensitive fusion protein | transcript_product=N-ethylmaleimide-sensitive fusion protein | location=Pf3D7_03_v3:159353-161704(-) | protein_length=783 | sequence_SO=chromosome | SO=protein_coding | is_pseudo=false	26	26	26	26	26	26	26	26	26	26	26	26	312	509961	567518	588079	531187	629507	404032	539806	658577	404111	398699	131208	370644		549186	557980	326166	1.43333e+06		1.68377	1.71073		0.0377763	0.0377599
transcript=PF3D7_0303200.1	>PF3D7_0303200.1-p1 | transcript=PF3D7_0303200.1 | gene=PF3D7_0303200 | organism=Plasmodium_falciparum_3D7 | gene_product=HAD superfamily protein, putative | transcript_product=HAD superfamily protein, putative | location=Pf3D7_03_v3:169571-174300(+) | protein_length=1162 | sequence_SO=chromosome | SO=protein_coding | is_pseudo=false	17	17	17	17	17	17	17	17	17	17	17	17	204	119940	114044	89324.8	93533	109498	92134.1	105685	109770	139812	116747	111237	144756		104210	104272	128138	336620		0.813264	0.813742		0.0771379	0.0563482
transcript=PF3D7_0303300.1	>PF3D7_0303300.1-p1 | transcript=PF3D7_0303300.1 | gene=PF3D7_0303300 | organism=Plasmodium_falciparum_3D7 | gene_product=DNA-directed RNA polymerases I, II, and III subunit RPABC2, putative | transcript_product=DNA-directed RNA polymerases I, II, and III subunit RPABC2, putative | location=Pf3D7_03_v3:175022-175799(-) | protein_length=153 | sequence_SO=chromosome | SO=protein_coding | is_pseudo=…	8	8	8	8	8	8	8	8	8	8	8	8	96	591468	736462	611412	567283	667039	494503	582282	778296	692669	550395	584769	697259		626656	630530	631273	1.88846e+06		0.992687	0.998824		0.933591	0.992081
transcript=PF3D7_0303500.1	>PF3D7_0303500.1-p1 | transcript=PF3D7_0303500.1 | gene=PF3D7_0303500 | organism=Plasmodium_falciparum_3D7 | gene_product=spindle pole body protein, putative | transcript_product=spindle pole body protein, putative | location=Pf3D7_03_v3:182731-189411(+) | protein_length=2226 | sequence_SO=chromosome | SO=protein_coding | is_pseudo=false	8	8	8	8	8	8	8	8	8	8	8	8	96	73141.3	62445.8	68818.4	64993.7	49544.6	77082.1	51316	44716.6	30495.2	68461.3	63647.4	68895.4		67349.8	55664.8	57874.8	180889		1.16372	0.961815		0.384225	0.857106
transcript=PF3D7_0303700.1	>PF3D7_0303700.1-p1 | transcript=PF3D7_0303700.1 | gene=PF3D7_0303700 | organism=Plasmodium_falciparum_3D7 | gene_product=lipoamide acyltransferase component of branched-chain alpha-keto acid dehydrogenase complex | transcript_product=lipoamide acyltransferase component of branched-chain alpha-keto acid dehydrogenase complex | location=Pf3D7_03_v3:191245-192591(-) | protein_length=448 | sequence_…	9	9	9	9	9	9	9	9	9	9	9	9	108	1.29727e+06	2.6065e+06	2.43671e+06	2.22166e+06	1667218	2311831	1.52072e+06	2202417	2416922	1.74142e+06	2.16036e+06	2.38618e+06		2.14054e+06	1.92555e+06	2.17622e+06	6.2423e+06		0.983603	0.884813		0.918684	0.35587
transcript=PF3D7_0304200.1	>PF3D7_0304200.1-p1 | transcript=PF3D7_0304200.1 | gene=PF3D7_0304200 | organism=Plasmodium_falciparum_3D7 | gene_product=EH domain-containing protein | transcript_product=EH domain-containing protein | location=Pf3D7_03_v3:207342-208919(-) | protein_length=525 | sequence_SO=chromosome | SO=protein_coding | is_pseudo=false	16	16	16	16	16	16	16	16	16	16	16	16	192	63962.1	54297.3	52205.1	64254	56225.2	57506.8	48896	74629.5	258253	61531.9	66346.8	29885.5		58679.6	59314.4	104004	221998		0.564203	0.570307		0.448259	0.454664
transcript=PF3D7_0304400.1	>PF3D7_0304400.1-p1 | transcript=PF3D7_0304400.1 | gene=PF3D7_0304400 | organism=Plasmodium_falciparum_3D7 | gene_product=60S ribosomal protein L44 | transcript_product=60S ribosomal protein L44 | location=Pf3D7_03_v3:217941-218489(+) | protein_length=104 | sequence_SO=chromosome | SO=protein_coding | is_pseudo=false	3	3	3	3	3	3	3	3	3	3	3	3	36	403194	282948	199362	285655	314363	299132	186376	380661	320492	355645	330457	376990		292790	295133	345896	933819		0.846468	0.853242		0.29972	0.30326
transcript=PF3D7_0305200.1	>PF3D7_0305200.1-p1 | transcript=PF3D7_0305200.1 | gene=PF3D7_0305200 | organism=Plasmodium_falciparum_3D7 | gene_product=conserved Plasmodium protein, unknown function | transcript_product=conserved Plasmodium protein, unknown function | location=Pf3D7_03_v3:251242-254661(+) | protein_length=1139 | sequence_SO=chromosome | SO=protein_coding | is_pseudo=false	21	21	21	21	21	21	21	21	21	21	21	21	252	229294	303101	218428	175160	262110	271448	211840	219074	251718	146744	188967	245995		231496	241118	208356	680970		1.11106	1.15724		0.54908	0.312359
transcript=PF3D7_0305300.1	>PF3D7_0305300.1-p1 | transcript=PF3D7_0305300.1 | gene=PF3D7_0305300 | organism=Plasmodium_falciparum_3D7 | gene_product=conserved Plasmodium membrane protein, unknown function | transcript_product=conserved Plasmodium membrane protein, unknown function | location=Pf3D7_03_v3:255276-258416(-) | protein_length=956 | sequence_SO=chromosome | SO=protein_coding | is_pseudo=false	11	11	11	11	11	11	11	11	11	11	11	11	132	1.18837e+06	1.43544e+06	1.22518e+06	1.19675e+06	1.49032e+06	1060224	1.2883e+06	1.55974e+06	1.20387e+06	1047222	1.11421e+06	1.28003e+06		1.26144e+06	1.34965e+06	1.16133e+06	3.77242e+06		1.08619	1.16215		0.2454	0.198492
transcript=PF3D7_0305500.1	>PF3D7_0305500.1-p1 | transcript=PF3D7_0305500.1 | gene=PF3D7_0305500 | organism=Plasmodium_falciparum_3D7 | gene_product=conserved Plasmodium protein, unknown function | transcript_product=conserved Plasmodium protein, unknown function | location=Pf3D7_03_v3:261485-273286(-) | protein_length=3933 | sequence_SO=chromosome | SO=protein_coding | is_pseudo=false	33	33	33	33	33	33	33	33	33	33	33	33	396	198740	238541	190308	189880	205953	161600	204189	233560	185602	164527	166767	173681		204367	201326	172644	578337		1.18375	1.16613		0.0645294	0.147435
transcript=PF3D7_0305600.1	>PF3D7_0305600.1-p1 | transcript=PF3D7_0305600.1 | gene=PF3D7_0305600 | organism=Plasmodium_falciparum_3D7 | gene_product=DNA-(apurinic or apyrimidinic site) lyase, putative | transcript_product=DNA-(apurinic or apyrimidinic site) lyase, putative | location=Pf3D7_03_v3:275864-277717(-) | protein_length=617 | sequence_SO=chromosome | SO=protein_coding | is_pseudo=false	26	26	26	26	26	26	26	26	26	26	26	26	312	201374	265390	189268	187400	261809	193102	218112	207496	203836	187714	192414	192461		210858	220130	194106	625094		1.0863	1.13407		0.433675	0.176496
transcript=PF3D7_0305700.1	>PF3D7_0305700.1-p1 | transcript=PF3D7_0305700.1 | gene=PF3D7_0305700 | organism=Plasmodium_falciparum_3D7 | gene_product=ubiquitin-conjugating enzyme E2, putative | transcript_product=ubiquitin-conjugating enzyme E2, putative | location=Pf3D7_03_v3:278956-279828(-) | protein_length=142 | sequence_SO=chromosome | SO=protein_coding | is_pseudo=false	9	9	9	9	9	9	9	9	9	9	9	9	108	587036	548385	587342	551514	592031	658159	551429	552045	536379	541532	654404	507367		568569	588416	559921	1.71691e+06		1.01545	1.05089		0.813532	0.514376
transcript=PF3D7_0306100.1	>PF3D7_0306100.1-p1 | transcript=PF3D7_0306100.1 | gene=PF3D7_0306100 | organism=Plasmodium_falciparum_3D7 | gene_product=conserved Plasmodium protein, unknown function | transcript_product=conserved Plasmodium protein, unknown function | location=Pf3D7_03_v3:288637-290747(-) | protein_length=628 | sequence_SO=chromosome | SO=protein_coding | is_pseudo=false	16	16	16	16	16	16	16	16	16	16	16	16	192	121559	140390	113523	121032	153080	112943	130110	121079	122462	108599	117373	111060		124126	129303	114873	368302		1.08055	1.12561		0.219565	0.196708
transcript=PF3D7_0306200.1	>PF3D7_0306200.1-p1 | transcript=PF3D7_0306200.1 | gene=PF3D7_0306200 | organism=Plasmodium_falciparum_3D7 | gene_product=activator of Hsp90 ATPase | transcript_product=activator of Hsp90 ATPase | location=Pf3D7_03_v3:292943-294548(+) | protein_length=349 | sequence_SO=chromosome | SO=protein_coding | is_pseudo=false	10	10	10	10	10	10	10	10	10	10	10	10	120	235343	247248	264583	262600	249648	259811	276619	258040	252640	246315	225123	236940		252443	261029	240254	753727		1.05073	1.08647		0.231122	0.0451824
transcript=PF3D7_0306300.1	>PF3D7_0306300.1-p1 | transcript=PF3D7_0306300.1 | gene=PF3D7_0306300 | organism=Plasmodium_falciparum_3D7 | gene_product=glutaredoxin 1 | transcript_product=glutaredoxin 1 | location=Pf3D7_03_v3:295107-296094(-) | protein_length=111 | sequence_SO=chromosome | SO=protein_coding | is_pseudo=false	15	15	15	15	15	15	15	15	15	15	15	15	180	3.79909e+06	4873251	4.04434e+06	3621012	3.85289e+06	3.11587e+06	3664505	4.457e+06	3.61424e+06	3.32835e+06	3.82437e+06	3.42367e+06		4.08442e+06	3.77256e+06	3.54766e+06	1.14046e+07		1.1513	1.0634		0.147334	0.492564
transcript=PF3D7_0306900.1	>PF3D7_0306900.1-p1 | transcript=PF3D7_0306900.1 | gene=PF3D7_0306900 | organism=Plasmodium_falciparum_3D7 | gene_product=40S ribosomal protein S23, putative | transcript_product=40S ribosomal protein S23, putative | location=Pf3D7_03_v3:310652-311805(+) | protein_length=145 | sequence_SO=chromosome | SO=protein_coding | is_pseudo=false	5	5	5	5	5	5	5	5	5	5	5	5	60	1.15628e+06	1.08177e+06	905047	917872	968802	894290	844268	1.10655e+06	1.08865e+06	1.03607e+06	977099	1.18014e+06		1.01524e+06	953477	1.07049e+06	3.03921e+06		0.94839	0.890691		0.494468	0.156571
transcript=PF3D7_0307100.1	>PF3D7_0307100.1-p1 | transcript=PF3D7_0307100.1 | gene=PF3D7_0307100 | organism=Plasmodium_falciparum_3D7 | gene_product=40S ribosomal protein S12, putative | transcript_product=40S ribosomal protein S12, putative | location=Pf3D7_03_v3:312693-313342(-) | protein_length=141 | sequence_SO=chromosome | SO=protein_coding | is_pseudo=false	23	23	23	23	23	23	23	23	23	23	23	23	276	5.28335e+06	6304517	5.65664e+06	5643963	6559850	5.18219e+06	6006564	6515208	7.20684e+06	5.38372e+06	5277182	7021564		5.72212e+06	6.06595e+06	6.22233e+06	1.80104e+07		0.919611	0.974869		0.42144	0.807243
transcript=PF3D7_0307200.1	>PF3D7_0307200.1-p1 | transcript=PF3D7_0307200.1 | gene=PF3D7_0307200 | organism=Plasmodium_falciparum_3D7 | gene_product=60S ribosomal protein L7, putative | transcript_product=60S ribosomal protein L7, putative | location=Pf3D7_03_v3:314976-316236(-) | protein_length=257 | sequence_SO=chromosome | SO=protein_coding | is_pseudo=false	22	22	22	22	22	22	22	22	22	22	22	22	264	441037	420803	346785	342381	443220	424019	440379	347376	458409	542230	461020	391463		387752	413749	463281	1.26478e+06		0.836969	0.893084		0.108973	0.246538
transcript=PF3D7_0307700.1	>PF3D7_0307700.1-p1 | transcript=PF3D7_0307700.1 | gene=PF3D7_0307700 | organism=Plasmodium_falciparum_3D7 | gene_product=conserved Plasmodium protein, unknown function | transcript_product=conserved Plasmodium protein, unknown function | location=Pf3D7_03_v3:328787-335269(-) | protein_length=1826 | sequence_SO=chromosome | SO=protein_coding | is_pseudo=false	34	34	34	34	34	34	34	34	34	34	34	34	408	54498.5	34469.5	28649.2	48885	25203.6	37314.2	53663.8	49706.4	31135.8	38972.7	28650.2	26444.4		41625.6	41472	31300.8	114398		1.32986	1.32495		0.191417	0.219093
transcript=PF3D7_0308000.1	>PF3D7_0308000.1-p1 | transcript=PF3D7_0308000.1 | gene=PF3D7_0308000 | organism=Plasmodium_falciparum_3D7 | gene_product=DNA polymerase delta small subunit, putative | transcript_product=DNA polymerase delta small subunit, putative | location=Pf3D7_03_v3:353549-355045(+) | protein_length=498 | sequence_SO=chromosome | SO=protein_coding | is_pseudo=false	5	5	5	5	5	5	5	5	5	5	5	5	60	138629	139047	42492	142413	45805.8	47647.1	124628	29328.7	35074.9	124150	113539	37018.7		115645	61852.4	77445.4	254943		1.49325	0.798658		0.307088	0.644681
transcript=PF3D7_0308200.1	>PF3D7_0308200.1-p1 | transcript=PF3D7_0308200.1 | gene=PF3D7_0308200 | organism=Plasmodium_falciparum_3D7 | gene_product=T-complex protein 1 subunit eta | transcript_product=T-complex protein 1 subunit eta | location=Pf3D7_03_v3:362342-364233(-) | protein_length=539 | sequence_SO=chromosome | SO=protein_coding | is_pseudo=false	31	31	31	31	31	31	31	31	31	31	31	31	372	399661	324605	537904	509803	429431	510092	490344	471060	444374	390724	537555	433018		442993	475232	451418	1.36964e+06		0.981338	1.05275		0.890804	0.532962
transcript=PF3D7_0308500.1	>PF3D7_0308500.1-p1 | transcript=PF3D7_0308500.1 | gene=PF3D7_0308500 | organism=Plasmodium_falciparum_3D7 | gene_product=activator of Hsp90 ATPase, putative | transcript_product=activator of Hsp90 ATPase, putative | location=Pf3D7_03_v3:369925-370789(+) | protein_length=140 | sequence_SO=chromosome | SO=protein_coding | is_pseudo=false	4	4	4	4	4	4	4	4	4	4	4	4	48	259321	13418	22834.3	32305.8	326271	22389.7	367636	30298.1	410491	26690.6	24544.5	357786		81969.8	186649	204878	473497		0.400091	0.911024		0.353971	0.900373
transcript=PF3D7_0308600.1	>PF3D7_0308600.1-p1 | transcript=PF3D7_0308600.1 | gene=PF3D7_0308600 | organism=Plasmodium_falciparum_3D7 | gene_product=pre-mRNA-processing factor 19, putative | transcript_product=pre-mRNA-processing factor 19, putative | location=Pf3D7_03_v3:372632-374230(+) | protein_length=532 | sequence_SO=chromosome | SO=protein_coding | is_pseudo=false	15	15	15	15	15	15	15	15	15	15	15	15	180	36013.1	49132.1	25771.2	41739.3	41305.3	45231.8	42741.6	20870.8	26220.9	32923	24302.9	27779.1		38163.9	37537.4	27806.5	103508		1.37248	1.34995		0.123582	0.181989
transcript=PF3D7_0308700.1	>PF3D7_0308700.1-p1 | transcript=PF3D7_0308700.1 | gene=PF3D7_0308700 | organism=Plasmodium_falciparum_3D7 | gene_product=conserved protein, unknown function | transcript_product=conserved protein, unknown function | location=Pf3D7_03_v3:375806-377437(+) | protein_length=492 | sequence_SO=chromosome | SO=protein_coding | is_pseudo=false	8	8	8	8	8	8	8	8	8	8	8	8	96	20237.7	120397	86969.6	14983.6	35741	16142.7	18980.1	99306.2	84981.3	19243.6	17696.4	101224		60646.9	42542.5	55786.4	158976		1.08713	0.762597		0.890392	0.666175
transcript=PF3D7_0309300.1	>PF3D7_0309300.1-p1 | transcript=PF3D7_0309300.1 | gene=PF3D7_0309300 | organism=Plasmodium_falciparum_3D7 | gene_product=N2227-like protein, putative | transcript_product=N2227-like protein, putative | location=Pf3D7_03_v3:397649-400516(+) | protein_length=955 | sequence_SO=chromosome | SO=protein_coding | is_pseudo=false	11	11	11	11	11	11	11	11	11	11	11	11	132	21885.5	26761.6	54849.7	35646.4	35892.4	31723.6	30864.2	32404.1	35977.3	26139.8	24759.2	52529.3		34785.8	32721.1	34851.4	102358		0.998118	0.938874		0.994818	0.763324
transcript=PF3D7_0309500.1	>PF3D7_0309500.1-p1 | transcript=PF3D7_0309500.1 | gene=PF3D7_0309500 | organism=Plasmodium_falciparum_3D7 | gene_product=asparagine synthetase [glutamine-hydrolyzing], putative | transcript_product=asparagine synthetase [glutamine-hydrolyzing], putative | location=Pf3D7_03_v3:402933-405440(+) | protein_length=610 | sequence_SO=chromosome | SO=protein_coding | is_pseudo=false	28	28	28	28	28	28	28	28	28	28	28	28	336	422724	389316	406346	330073	407397	424074	409227	377741	412590	449621	434764	407112		387115	404610	426022	1.21775e+06		0.908674	0.94974		0.152736	0.173029
transcript=PF3D7_0309600.1	>PF3D7_0309600.1-p1 | transcript=PF3D7_0309600.1 | gene=PF3D7_0309600 | organism=Plasmodium_falciparum_3D7 | gene_product=60S acidic ribosomal protein P2 | transcript_product=60S acidic ribosomal protein P2 | location=Pf3D7_03_v3:407980-408318(+) | protein_length=112 | sequence_SO=chromosome | SO=protein_coding | is_pseudo=false	19	19	19	19	19	19	19	19	19	19	19	19	228	6820935	9114166	6.02262e+06	6103862	8090138	6978698	7.65601e+06	8134149	7699393	6.02256e+06	6.43843e+06	7057237		7.01539e+06	7.71475e+06	6.80441e+06	21534549		1.03101	1.13379		0.806068	0.0960591
transcript=PF3D7_0310300.1	>PF3D7_0310300.1-p1 | transcript=PF3D7_0310300.1 | gene=PF3D7_0310300 | organism=Plasmodium_falciparum_3D7 | gene_product=phosphoglycerate mutase, putative | transcript_product=phosphoglycerate mutase, putative | location=Pf3D7_03_v3:442720-446457(+) | protein_length=1165 | sequence_SO=chromosome | SO=protein_coding | is_pseudo=false	16	16	16	16	16	16	16	16	16	16	16	16	192	23334.7	21168	27570.9	28008	30771.5	25332.1	32268.5	15993.6	31836.7	26355.4	31880	29652.9		25020.4	26091.4	29931.3	81043.1		0.835929	0.871711		0.0612725	0.384636
transcript=PF3D7_0310400.1	>PF3D7_0310400.1-p1 | transcript=PF3D7_0310400.1 | gene=PF3D7_0310400 | organism=Plasmodium_falciparum_3D7 | gene_product=parasite-infected erythrocyte surface protein | transcript_product=parasite-infected erythrocyte surface protein | location=Pf3D7_03_v3:447500-451384(+) | protein_length=1294 | sequence_SO=chromosome | SO=protein_coding | is_pseudo=false	65	65	65	65	65	65	65	65	65	65	65	65	780	306165	349697	343598	333341	404526	309304	334807	422199	345768	326427	300100	331232		333200	367709	325882	1.02679e+06		1.02246	1.12835		0.608346	0.224126
transcript=PF3D7_0310500.1	>PF3D7_0310500.1-p1 | transcript=PF3D7_0310500.1 | gene=PF3D7_0310500 | organism=Plasmodium_falciparum_3D7 | gene_product=ATP-dependent RNA helicase DHX57, putative | transcript_product=ATP-dependent RNA helicase DHX57, putative | location=Pf3D7_03_v3:452297-459106(-) | protein_length=2269 | sequence_SO=chromosome | SO=protein_coding | is_pseudo=false	22	22	22	22	22	22	22	22	22	22	22	22	264	36764.5	33538.3	80460.2	44834.7	33195.4	19621	36343.9	25119.1	19225.2	48525.8	40485	36878.4		48899.4	28569.8	36278.6	113748		1.34789	0.787512		0.358616	0.337075
transcript=PF3D7_0310600.1;transcript=PF3D7_0310600.2	>PF3D7_0310600.1-p1 | transcript=PF3D7_0310600.1 | gene=PF3D7_0310600 | organism=Plasmodium_falciparum_3D7 | gene_product=eukaryotic translation initiation factor 3 subunit K, putative, unspecified product | transcript_product=eukaryotic translation initiation factor 3 subunit K, putative | location=Pf3D7_03_v3:461175-462027(-) | protein_length=235 | sequence_SO=chromosome | SO=protein_coding | i…	15	15	15	15	15	15	15	15	15	15	15	15	180	43907.6	36326.9	91622.1	59504.2	34406.5	43406.5	72346.5	47305.2	25548.1	56048.3	60475.3	75575.4		57840.2	49366.2	54411.8	161618		1.06301	0.90727		0.838858	0.717604
transcript=PF3D7_0310900.1	>PF3D7_0310900.1-p1 | transcript=PF3D7_0310900.1 | gene=PF3D7_0310900 | organism=Plasmodium_falciparum_3D7 | gene_product=conserved Plasmodium protein, unknown function | transcript_product=conserved Plasmodium protein, unknown function | location=Pf3D7_03_v3:466085-468445(+) | protein_length=786 | sequence_SO=chromosome | SO=protein_coding | is_pseudo=false	11	11	11	11	11	11	11	11	11	11	11	11	132	68627.6	92033.1	59979.3	63623.2	84699.3	56486.7	60755.3	73337.6	59850.6	63193.3	59670.8	30631.7		71065.8	68819.7	53336.6	193222		1.3324	1.29029		0.141937	0.171688
transcript=PF3D7_0312300.1	>PF3D7_0312300.1-p1 | transcript=PF3D7_0312300.1 | gene=PF3D7_0312300 | organism=Plasmodium_falciparum_3D7 | gene_product=26S proteasome regulatory subunit RPN12, putative | transcript_product=26S proteasome regulatory subunit RPN12, putative | location=Pf3D7_03_v3:521969-522883(+) | protein_length=304 | sequence_SO=chromosome | SO=protein_coding | is_pseudo=false	7	7	7	7	7	7	7	7	7	7	7	7	84	88440.8	88208.6	96955.4	67361.9	46142	102262	76495.1	48803.9	94822.9	49666.6	88265.9	94535.4		85241.7	68425.7	81822.7	235490		1.04179	0.836267		0.796154	0.463571
transcript=PF3D7_0312400.1	>PF3D7_0312400.1-p1 | transcript=PF3D7_0312400.1 | gene=PF3D7_0312400 | organism=Plasmodium_falciparum_3D7 | gene_product=glycogen synthase kinase 3 | transcript_product=glycogen synthase kinase 3 | location=Pf3D7_03_v3:524154-526439(-) | protein_length=440 | sequence_SO=chromosome | SO=protein_coding | is_pseudo=false	11	11	11	11	11	11	11	11	11	11	11	11	132	120826	122481	123525	95319.5	103079	128938	128299	113917	161951	114485	111825	98984.6		115538	118558	121811	355907		0.948498	0.973293		0.702381	0.839936
transcript=PF3D7_0312800.1	>PF3D7_0312800.1-p1 | transcript=PF3D7_0312800.1 | gene=PF3D7_0312800 | organism=Plasmodium_falciparum_3D7 | gene_product=60S ribosomal protein L26, putative | transcript_product=60S ribosomal protein L26, putative | location=Pf3D7_03_v3:534239-535238(+) | protein_length=126 | sequence_SO=chromosome | SO=protein_coding | is_pseudo=false	7	7	7	7	7	7	7	7	7	7	7	7	84	693231	562478	580662	611277	607033	714000	459567	528506	512264	702670	617095	510825		611912	577277	585713	1.7749e+06		1.04473	0.985596		0.651144	0.910119
transcript=PF3D7_0313000.1	>PF3D7_0313000.1-p1 | transcript=PF3D7_0313000.1 | gene=PF3D7_0313000 | organism=Plasmodium_falciparum_3D7 | gene_product=conserved Plasmodium protein, unknown function | transcript_product=conserved Plasmodium protein, unknown function | location=Pf3D7_03_v3:537621-538804(-) | protein_length=346 | sequence_SO=chromosome | SO=protein_coding | is_pseudo=false	12	12	12	12	12	12	12	12	12	12	12	12	144	125566	151529	114581	136049	133428	108869	121190	166445	90852	123300	108402	122245		131931	132483	111200	375614		1.18644	1.1914		0.106641	0.202891
transcript=PF3D7_0314100.1	>PF3D7_0314100.1-p1 | transcript=PF3D7_0314100.1 | gene=PF3D7_0314100 | organism=Plasmodium_falciparum_3D7 | gene_product=vesicle transport v-SNARE protein, putative | transcript_product=vesicle transport v-SNARE protein, putative | location=Pf3D7_03_v3:569308-571051(-) | protein_length=198 | sequence_SO=chromosome | SO=protein_coding | is_pseudo=false	10	10	10	10	10	10	10	10	10	10	10	10	120	44864.8	134571	43912.1	56498.2	131554	47699	56862.2	50955.8	87548.1	56557.8	120681	73104		69961.5	71767.8	84472.7	226202		0.828214	0.849598		0.595761	0.621097
transcript=PF3D7_0315100.1	>PF3D7_0315100.1-p1 | transcript=PF3D7_0315100.1 | gene=PF3D7_0315100 | organism=Plasmodium_falciparum_3D7 | gene_product=eukaryotic translation initiation factor 4E | transcript_product=eukaryotic translation initiation factor 4E | location=Pf3D7_03_v3:612739-613422(-) | protein_length=227 | sequence_SO=chromosome | SO=protein_coding | is_pseudo=false	14	14	14	14	14	14	14	14	14	14	14	14	168	417785	438498	392435	402992	450542	352658	438554	294619	512530	478670	457217	472982		412928	384093	480350	1.27737e+06		0.859639	0.799611		0.00485168	0.0749893
transcript=PF3D7_0315800.1	>PF3D7_0315800.1-p1 | transcript=PF3D7_0315800.1 | gene=PF3D7_0315800 | organism=Plasmodium_falciparum_3D7 | gene_product=zinc finger protein, putative | transcript_product=zinc finger protein, putative | location=Pf3D7_03_v3:641482-642579(-) | protein_length=365 | sequence_SO=chromosome | SO=protein_coding | is_pseudo=false	8	8	8	8	8	8	8	8	8	8	8	8	96	14193.6	68403.9	17479.8	38024.2	39708.1	17826.9	19385.6	14352.6	54218.8	41360.7	16261.8	42366		34525.4	22818.3	38551.8	95895.5		0.895557	0.591886		0.796242	0.165452
transcript=PF3D7_0316300.1;transcript=PF3D7_0316300.2	>PF3D7_0316300.1-p1 | transcript=PF3D7_0316300.1 | gene=PF3D7_0316300 | organism=Plasmodium_falciparum_3D7 | gene_product=inorganic pyrophosphatase, inorganic pyrophosphatase, putative | transcript_product=inorganic pyrophosphatase | location=Pf3D7_03_v3:660020-661643(+) | protein_length=380 | sequence_SO=chromosome | SO=protein_coding | is_pseudo=false;>PF3D7_0316300.2-p1 | transcript=PF3D7_0316…	13	13	13	13	13	13	13	13	13	13	13	13	156	63305.9	363294	22176.4	36205.8	346143	248646	228548	352651	23284.1	22936.8	131752	22848.6		121246	293997	50205.4	465448		2.41499	5.85589		0.457046	0.00129728
transcript=PF3D7_0316400.1	>PF3D7_0316400.1-p1 | transcript=PF3D7_0316400.1 | gene=PF3D7_0316400 | organism=Plasmodium_falciparum_3D7 | gene_product=conserved protein, unknown function | transcript_product=conserved protein, unknown function | location=Pf3D7_03_v3:662126-665152(-) | protein_length=1008 | sequence_SO=chromosome | SO=protein_coding | is_pseudo=false	6	6	6	6	6	6	6	6	6	6	6	6	72	15946.8	17341.1	14225.1	21538.7	44071.1	14507.5	15776	63261.1	42009.8	23151.9	13233.9	41081.3		17262.9	34403.9	29869.2	81536.1		0.57795	1.15182		0.170555	0.754946
transcript=PF3D7_0316500.1	>PF3D7_0316500.1-p1 | transcript=PF3D7_0316500.1 | gene=PF3D7_0316500 | organism=Plasmodium_falciparum_3D7 | gene_product=kinetochore protein NUF2, putative | transcript_product=kinetochore protein NUF2, putative | location=Pf3D7_03_v3:667006-668391(+) | protein_length=461 | sequence_SO=chromosome | SO=protein_coding | is_pseudo=false	30	30	30	30	30	30	30	30	30	30	30	30	360	36862.3	33175	86717.5	34954.8	82540.3	40895	34246.1	45738.4	61639.9	59099.3	44610	84593.3		47927.4	50854.9	62485.6	161268		0.767015	0.813867		0.386151	0.428035
transcript=PF3D7_0316600.1	>PF3D7_0316600.1-p1 | transcript=PF3D7_0316600.1 | gene=PF3D7_0316600 | organism=Plasmodium_falciparum_3D7 | gene_product=formate-nitrite transporter | transcript_product=formate-nitrite transporter | location=Pf3D7_03_v3:669302-670873(-) | protein_length=309 | sequence_SO=chromosome | SO=protein_coding | is_pseudo=false	9	9	9	9	9	9	9	9	9	9	9	9	108	202347	150697	204346	193357	178288	290990	182725	24089.7	174541	194253	218285	180549		187687	169023	191907	548617		0.978009	0.880755		0.799822	0.707467
transcript=PF3D7_0316800.1	>PF3D7_0316800.1-p1 | transcript=PF3D7_0316800.1 | gene=PF3D7_0316800 | organism=Plasmodium_falciparum_3D7 | gene_product=40S ribosomal protein S15A, putative | transcript_product=40S ribosomal protein S15A, putative | location=Pf3D7_03_v3:677842-678474(+) | protein_length=130 | sequence_SO=chromosome | SO=protein_coding | is_pseudo=false	13	13	13	13	13	13	13	13	13	13	13	13	156	899335	384895	1388999	1.15419e+06	497283	1.76881e+06	605225	292296	624870	1.22164e+06	877194	618835		956854	790905	835635	2.58339e+06		1.14506	0.946471		0.657433	0.907396
transcript=PF3D7_0317000.1	>PF3D7_0317000.1-p1 | transcript=PF3D7_0317000.1 | gene=PF3D7_0317000 | organism=Plasmodium_falciparum_3D7 | gene_product=proteasome subunit alpha type-3, putative | transcript_product=proteasome subunit alpha type-3, putative | location=Pf3D7_03_v3:682795-683685(-) | protein_length=252 | sequence_SO=chromosome | SO=protein_coding | is_pseudo=false	16	16	16	16	16	16	16	16	16	16	16	16	192	2.4676e+06	1.94528e+06	2893875	1.70161e+06	2.08126e+06	2.27108e+06	2721197	2.32485e+06	2.75953e+06	2590806	2.80906e+06	2.96486e+06		2.25209e+06	2.3496e+06	2.78106e+06	7.38275e+06		0.809795	0.844856		0.139924	0.0406612
transcript=PF3D7_0317200.1	>PF3D7_0317200.1-p1 | transcript=PF3D7_0317200.1 | gene=PF3D7_0317200 | organism=Plasmodium_falciparum_3D7 | gene_product=cdc2-related protein kinase 4 | transcript_product=cdc2-related protein kinase 4 | location=Pf3D7_03_v3:690154-694815(-) | protein_length=1553 | sequence_SO=chromosome | SO=protein_coding | is_pseudo=false	23	23	23	23	23	23	23	23	23	23	23	23	276	63374.8	41446.1	85345.2	74602.5	107750	19157.4	32838.1	41628.6	55146.5	33548.8	22251	73770		66192.2	50343.5	46179.1	162715		1.43338	1.09018		0.227066	0.862349
transcript=PF3D7_0317300.1	>PF3D7_0317300.1-p1 | transcript=PF3D7_0317300.1 | gene=PF3D7_0317300 | organism=Plasmodium_falciparum_3D7 | gene_product=conserved Plasmodium protein, unknown function | transcript_product=conserved Plasmodium protein, unknown function | location=Pf3D7_03_v3:699544-709728(-) | protein_length=3394 | sequence_SO=chromosome | SO=protein_coding | is_pseudo=false	70	70	70	70	70	70	70	70	70	70	70	70	840	502022	558061	388474	401157	612637	399611	468934	512769	480989	453082	414990	451580		462429	498488	450161	1.41108e+06		1.02725	1.10736		0.790601	0.365344
transcript=PF3D7_0317600.1	>PF3D7_0317600.1-p1 | transcript=PF3D7_0317600.1 | gene=PF3D7_0317600 | organism=Plasmodium_falciparum_3D7 | gene_product=40S ribosomal protein S11, putative | transcript_product=40S ribosomal protein S11, putative | location=Pf3D7_03_v3:725015-726130(+) | protein_length=161 | sequence_SO=chromosome | SO=protein_coding | is_pseudo=false	11	11	11	11	11	11	11	11	11	11	11	11	132	5575175	6.43155e+06	4960894	4960491	6200331	4910798	5336607	5.39912e+06	6239919	5.10374e+06	5.1576e+06	6087703		5.48203e+06	5.46171e+06	5.64724e+06	1.6591e+07		0.970744	0.967147		0.731787	0.661662
transcript=PF3D7_0317800.1	>PF3D7_0317800.1-p1 | transcript=PF3D7_0317800.1 | gene=PF3D7_0317800 | organism=Plasmodium_falciparum_3D7 | gene_product=26S proteasome non-ATPase regulatory subunit 9, putative | transcript_product=26S proteasome non-ATPase regulatory subunit 9, putative | location=Pf3D7_03_v3:738205-738882(-) | protein_length=225 | sequence_SO=chromosome | SO=protein_coding | is_pseudo=false	13	13	13	13	13	13	13	13	13	13	13	13	156	817642	989830	956991	859002	966460	777898	840408	1.13571e+06	830848	796435	887468	835693		905866	930119	837611	2.6736e+06		1.08149	1.11044		0.196803	0.329474
transcript=PF3D7_0318200.1	>PF3D7_0318200.1-p1 | transcript=PF3D7_0318200.1 | gene=PF3D7_0318200 | organism=Plasmodium_falciparum_3D7 | gene_product=DNA-directed RNA polymerase II subunit RPB1 | transcript_product=DNA-directed RNA polymerase II subunit RPB1 | location=Pf3D7_03_v3:748465-755838(+) | protein_length=2457 | sequence_SO=chromosome | SO=protein_coding | is_pseudo=false	65	65	65	65	65	65	65	65	65	65	65	65	780	630095	775249	568710	595001	735517	540771	614714	667864	670512	596855	633855	681912		642264	639716	645783	1.92776e+06		0.99455	0.990605		0.947183	0.89999
transcript=PF3D7_0318300.1	>PF3D7_0318300.1-p1 | transcript=PF3D7_0318300.1 | gene=PF3D7_0318300 | organism=Plasmodium_falciparum_3D7 | gene_product=conserved Plasmodium protein, unknown function | transcript_product=conserved Plasmodium protein, unknown function | location=Pf3D7_03_v3:756491-760292(-) | protein_length=1119 | sequence_SO=chromosome | SO=protein_coding | is_pseudo=false	11	11	11	11	11	11	11	11	11	11	11	11	132	19358.3	120550	133918	274468	26686.9	14847.7	105088	21166	71303.9	149691	18681.1	77048.9		137074	41947.2	79181.1	258202		1.73114	0.529762		0.376178	0.321026
transcript=PF3D7_0319100.1	>PF3D7_0319100.1-p1 | transcript=PF3D7_0319100.1 | gene=PF3D7_0319100 | organism=Plasmodium_falciparum_3D7 | gene_product=E3 ubiquitin-protein ligase RBX1, putative | transcript_product=E3 ubiquitin-protein ligase RBX1, putative | location=Pf3D7_03_v3:802260-802583(-) | protein_length=107 | sequence_SO=chromosome | SO=protein_coding | is_pseudo=false	3	3	3	3	3	3	3	3	3	3	3	3	36	17777.6	96227.2	21751.8	23796	112072	21651.9	75204.3	60198.7	28423.3	87350.8	22191.1	19015		39888.2	67281.7	39245	146415		1.01639	1.7144		0.980174	0.30086
transcript=PF3D7_0319200.1	>PF3D7_0319200.1-p1 | transcript=PF3D7_0319200.1 | gene=PF3D7_0319200 | organism=Plasmodium_falciparum_3D7 | gene_product=CCR4 domain-containing protein 4, putative | transcript_product=CCR4 domain-containing protein 4, putative | location=Pf3D7_03_v3:803592-806312(-) | protein_length=906 | sequence_SO=chromosome | SO=protein_coding | is_pseudo=false	6	6	6	6	6	6	6	6	6	6	6	6	72	85198.2	186832	164276	163729	134853	129753	155706	122501	96254.5	109990	97104.9	30190.7		150009	135703	83385.1	369097		1.79899	1.62743		0.0607731	0.0552298
transcript=PF3D7_0319500.1	>PF3D7_0319500.1-p1 | transcript=PF3D7_0319500.1 | gene=PF3D7_0319500 | organism=Plasmodium_falciparum_3D7 | gene_product=RNA-binding protein, putative | transcript_product=RNA-binding protein, putative | location=Pf3D7_03_v3:815569-816855(+) | protein_length=309 | sequence_SO=chromosome | SO=protein_coding | is_pseudo=false	5	5	5	5	5	5	5	5	5	5	5	5	60	114324	130190	105911	152275	102188	88665.4	110971	119135	102125	90519.6	89009.1	123525		125675	105240	101295	332209		1.24068	1.03895		0.111385	0.715291
transcript=PF3D7_0319600.1	>PF3D7_0319600.1-p1 | transcript=PF3D7_0319600.1 | gene=PF3D7_0319600 | organism=Plasmodium_falciparum_3D7 | gene_product=elongation factor 1-delta, putative | transcript_product=elongation factor 1-delta, putative | location=Pf3D7_03_v3:817913-818695(+) | protein_length=156 | sequence_SO=chromosome | SO=protein_coding | is_pseudo=false	7	7	7	7	7	7	7	7	7	7	7	7	84	215564	258019	285086	288509	168148	263453	221652	209529	193111	327970	277605	187990		261795	215695	246669	724159		1.06132	0.874433		0.708882	0.467305
transcript=PF3D7_0320000.1	>PF3D7_0320000.1-p1 | transcript=PF3D7_0320000.1 | gene=PF3D7_0320000 | organism=Plasmodium_falciparum_3D7 | gene_product=protein phosphatase inhibitor 2 | transcript_product=protein phosphatase inhibitor 2 | location=Pf3D7_03_v3:837307-838271(+) | protein_length=144 | sequence_SO=chromosome | SO=protein_coding | is_pseudo=false	2	2	2	2	2	2	2	2	2	2	2	2	24	256586	321865	270605	261330	257216	238096	298796	255819	201097	199296	200152	206319		277596	262482	201716	741794		1.37617	1.30124		0.014468	0.0171594
transcript=PF3D7_0320100.1	>PF3D7_0320100.1-p1 | transcript=PF3D7_0320100.1 | gene=PF3D7_0320100 | organism=Plasmodium_falciparum_3D7 | gene_product=protein transport protein SEC22 | transcript_product=protein transport protein SEC22 | location=Pf3D7_03_v3:840362-841758(+) | protein_length=221 | sequence_SO=chromosome | SO=protein_coding | is_pseudo=false	15	15	15	15	15	15	15	15	15	15	15	15	180	74172.7	66482.1	40507.5	40296.6	76636.7	49868.2	62654.4	73064.7	82261.5	59884.8	53374.4	81484.6		55364.7	65556	69251.3	190172		0.799476	0.946639		0.273459	0.712449
transcript=PF3D7_0320300.1	>PF3D7_0320300.1-p1 | transcript=PF3D7_0320300.1 | gene=PF3D7_0320300 | organism=Plasmodium_falciparum_3D7 | gene_product=T-complex protein 1 subunit epsilon | transcript_product=T-complex protein 1 subunit epsilon | location=Pf3D7_03_v3:845713-847320(+) | protein_length=535 | sequence_SO=chromosome | SO=protein_coding | is_pseudo=false	36	36	36	36	36	36	36	36	36	36	36	36	432	524141	633259	576441	496719	729076	663661	627823	674126	566166	512089	500858	596315		557640	673672	543857	1.77517e+06		1.02534	1.23869		0.727849	0.00565653
transcript=PF3D7_0320500.1	>PF3D7_0320500.1-p1 | transcript=PF3D7_0320500.1 | gene=PF3D7_0320500 | organism=Plasmodium_falciparum_3D7 | gene_product=nicotinamidase, putative | transcript_product=nicotinamidase, putative | location=Pf3D7_03_v3:860813-862102(+) | protein_length=429 | sequence_SO=chromosome | SO=protein_coding | is_pseudo=false	11	11	11	11	11	11	11	11	11	11	11	11	132	218586	207981	217466	204467	208013	223337	227672	236942	144760	177668	211236	157229		212125	223991	172723	608840		1.22812	1.29682		0.0693762	0.0309901
transcript=PF3D7_0320800.1	>PF3D7_0320800.1-p1 | transcript=PF3D7_0320800.1 | gene=PF3D7_0320800 | organism=Plasmodium_falciparum_3D7 | gene_product=ATP-dependent RNA helicase DDX6 | transcript_product=ATP-dependent RNA helicase DDX6 | location=Pf3D7_03_v3:870817-872342(+) | protein_length=433 | sequence_SO=chromosome | SO=protein_coding | is_pseudo=false	22	22	22	22	22	22	22	22	22	22	22	22	264	655393	900404	626552	599299	859809	571537	676030	694399	565553	631849	475842	478985		695412	700444	538057	1.93391e+06		1.29245	1.3018		0.107007	0.0687613
transcript=PF3D7_0320900.1	>PF3D7_0320900.1-p1 | transcript=PF3D7_0320900.1 | gene=PF3D7_0320900 | organism=Plasmodium_falciparum_3D7 | gene_product=histone H2A.Z | transcript_product=histone H2A.Z | location=Pf3D7_03_v3:875213-876295(+) | protein_length=158 | sequence_SO=chromosome | SO=protein_coding | is_pseudo=false	13	13	13	13	13	13	13	13	13	13	13	13	156	3333540	2.47836e+06	3.80368e+06	3447781	3038355	4.53715e+06	3031947	2404678	2.77758e+06	3.26775e+06	3281223	3287670		3.26584e+06	3.25303e+06	3.15356e+06	9.67243e+06		1.03561	1.03154		0.732974	0.844301
transcript=PF3D7_0321900.1	>PF3D7_0321900.1-p1 | transcript=PF3D7_0321900.1 | gene=PF3D7_0321900 | organism=Plasmodium_falciparum_3D7 | gene_product=cyclic amine resistance locus protein | transcript_product=cyclic amine resistance locus protein | location=Pf3D7_03_v3:922974-927942(+) | protein_length=1283 | sequence_SO=chromosome | SO=protein_coding | is_pseudo=false	3	3	3	3	3	3	3	3	3	3	3	3	36	15026.2	18349.8	18663.5	15870.6	13549	18300.1	16742.5	37069	19633.5	14850.7	15105.6	18899.7		16977.5	21415.2	17122.4	55515		0.991541	1.25071		0.928411	0.483536
transcript=PF3D7_0322000.1	>PF3D7_0322000.1-p1 | transcript=PF3D7_0322000.1 | gene=PF3D7_0322000 | organism=Plasmodium_falciparum_3D7 | gene_product=peptidyl-prolyl cis-trans isomerase | transcript_product=peptidyl-prolyl cis-trans isomerase | location=Pf3D7_03_v3:928644-929159(-) | protein_length=171 | sequence_SO=chromosome | SO=protein_coding | is_pseudo=false	13	13	13	13	13	13	13	13	13	13	13	13	156	2.49322e+06	2.13083e+06	2948994	4.06617e+06	1.33553e+06	2825631	2.1072e+06	1.95761e+06	1.77928e+06	1.42325e+06	1.71979e+06	2350139		2.9098e+06	2.05649e+06	1.81812e+06	6.78441e+06		1.60045	1.13111		0.0743421	0.539098
transcript=PF3D7_0322100.1	>PF3D7_0322100.1-p1 | transcript=PF3D7_0322100.1 | gene=PF3D7_0322100 | organism=Plasmodium_falciparum_3D7 | gene_product=mRNA-capping enzyme subunit beta | transcript_product=mRNA-capping enzyme subunit beta | location=Pf3D7_03_v3:930640-932415(-) | protein_length=591 | sequence_SO=chromosome | SO=protein_coding | is_pseudo=false	9	9	9	9	9	9	9	9	9	9	9	9	108	28877.5	44823.2	33670.2	39015.1	27871.4	31400.7	34385.3	32795.6	50213.9	32399.5	32661.4	43805.8		36596.5	31613.3	39770.2	107980		0.9202	0.794899		0.590442	0.158502
transcript=PF3D7_0322900.1	>PF3D7_0322900.1-p1 | transcript=PF3D7_0322900.1 | gene=PF3D7_0322900 | organism=Plasmodium_falciparum_3D7 | gene_product=40S ribosomal protein S3A, putative | transcript_product=40S ribosomal protein S3A, putative | location=Pf3D7_03_v3:965553-966502(-) | protein_length=262 | sequence_SO=chromosome | SO=protein_coding | is_pseudo=false	54	54	54	54	54	54	54	54	54	54	54	54	648	2.44907e+06	2640719	2.03705e+06	2.05447e+06	2561277	2.20142e+06	2240589	2453995	2.65409e+06	2.58234e+06	2.39849e+06	2.59873e+06		2.29533e+06	2.36432e+06	2.55841e+06	7.21806e+06		0.897169	0.924137		0.177512	0.114837
transcript=PF3D7_0323000.1	>PF3D7_0323000.1-p1 | transcript=PF3D7_0323000.1 | gene=PF3D7_0323000 | organism=Plasmodium_falciparum_3D7 | gene_product=translation machinery-associated protein 7, putative | transcript_product=translation machinery-associated protein 7, putative | location=Pf3D7_03_v3:968675-969202(-) | protein_length=54 | sequence_SO=chromosome | SO=protein_coding | is_pseudo=false	6	6	6	6	6	6	6	6	6	6	6	6	72	414613	461160	413054	403833	483977	368774	447427	490740	435652	370461	388613	388666		423165	447729	395848	1.26674e+06		1.06901	1.13106		0.200557	0.16582
transcript=PF3D7_0323500.1	>PF3D7_0323500.1-p1 | transcript=PF3D7_0323500.1 | gene=PF3D7_0323500 | organism=Plasmodium_falciparum_3D7 | gene_product=survival motor neuron-like protein | transcript_product=survival motor neuron-like protein | location=Pf3D7_03_v3:986265-987610(+) | protein_length=315 | sequence_SO=chromosome | SO=protein_coding | is_pseudo=false	8	8	8	8	8	8	8	8	8	8	8	8	96	45658.2	45752.1	39874.1	38461.7	53148.3	23899.7	50234.1	31675.9	45297.9	44242.1	43585.4	44346.3		42436.5	39739.5	44367.9	126544		0.956469	0.895681		0.38889	0.561487
transcript=PF3D7_0323600.1	>PF3D7_0323600.1-p1 | transcript=PF3D7_0323600.1 | gene=PF3D7_0323600 | organism=Plasmodium_falciparum_3D7 | gene_product=conserved Plasmodium protein, unknown function | transcript_product=conserved Plasmodium protein, unknown function | location=Pf3D7_03_v3:988631-990882(+) | protein_length=670 | sequence_SO=chromosome | SO=protein_coding | is_pseudo=false	4	4	4	4	4	4	4	4	4	4	4	4	48	20322	152642	25241.1	93181.9	107962	24749.7	37020.3	27409	132625	102680	77270.9	131640		72846.7	49285.3	111054	233186		0.655956	0.443796		0.324023	0.0461283
transcript=PF3D7_0323700.1	>PF3D7_0323700.1-p1 | transcript=PF3D7_0323700.1 | gene=PF3D7_0323700 | organism=Plasmodium_falciparum_3D7 | gene_product=U4/U6.U5 tri-snRNP-associated protein 1, putative | transcript_product=U4/U6.U5 tri-snRNP-associated protein 1, putative | location=Pf3D7_03_v3:991544-993625(-) | protein_length=693 | sequence_SO=chromosome | SO=protein_coding | is_pseudo=false	9	9	9	9	9	9	9	9	9	9	9	9	108	219346	269145	232600	253136	149457	163457	204239	322466	229834	159907	278671	259879		243557	209905	232073	685534		1.04948	0.904478		0.705481	0.657214
transcript=PF3D7_0323800.1	>PF3D7_0323800.1-p1 | transcript=PF3D7_0323800.1 | gene=PF3D7_0323800 | organism=Plasmodium_falciparum_3D7 | gene_product=conserved Plasmodium protein, unknown function | transcript_product=conserved Plasmodium protein, unknown function | location=Pf3D7_03_v3:998649-1001582(+) | protein_length=977 | sequence_SO=chromosome | SO=protein_coding | is_pseudo=false	10	10	10	10	10	10	10	10	10	10	10	10	120	69010.5	93608.6	46602.6	37668.1	74630.5	62661.9	79535.9	69681.4	68681.9	60069.6	59749.4	63251.1		61722.5	71627.4	62938	196288		0.980687	1.13806		0.929365	0.0932436
transcript=PF3D7_0401800.1	>PF3D7_0401800.1-p1 | transcript=PF3D7_0401800.1 | gene=PF3D7_0401800 | organism=Plasmodium_falciparum_3D7 | gene_product=Plasmodium exported protein (PHISTb), unknown function | transcript_product=Plasmodium exported protein (PHISTb), unknown function | location=Pf3D7_04_v3:103742-105603(-) | protein_length=560 | sequence_SO=chromosome | SO=protein_coding | is_pseudo=false	29	29	29	29	29	29	29	29	29	29	29	29	348	760264	870478	763361	718438	909892	762248	763247	832867	825186	781862	781095	803692		778135	817064	797959	2.39316e+06		0.975158	1.02394		0.595187	0.632792
transcript=PF3D7_0402000.1	>PF3D7_0402000.1-p1 | transcript=PF3D7_0402000.1 | gene=PF3D7_0402000 | organism=Plasmodium_falciparum_3D7 | gene_product=Plasmodium exported protein (PHISTa), unknown function | transcript_product=Plasmodium exported protein (PHISTa), unknown function | location=Pf3D7_04_v3:114601-116058(-) | protein_length=428 | sequence_SO=chromosome | SO=protein_coding | is_pseudo=false	9	9	9	9	9	9	9	9	9	9	9	9	108	135881	116174	159826	170628	99620.6	570325	166683	92654.6	206553	437306	260023	211486		145627	232321	278842	656790		0.522256	0.833162		0.0880646	0.729727
transcript=PF3D7_0402100.1	>PF3D7_0402100.1-p1 | transcript=PF3D7_0402100.1 | gene=PF3D7_0402100 | organism=Plasmodium_falciparum_3D7 | gene_product=Plasmodium exported protein (PHISTb), unknown function | transcript_product=Plasmodium exported protein (PHISTb), unknown function | location=Pf3D7_04_v3:123588-125464(-) | protein_length=575 | sequence_SO=chromosome | SO=protein_coding | is_pseudo=false	21	21	21	21	21	21	21	21	21	21	21	21	252	736225	1.12566e+06	966247	899337	1.14838e+06	752807	929516	1.14082e+06	713103	644046	810796	800128		931867	992880	742018	2.66677e+06		1.25586	1.33808		0.0962702	0.070726
transcript=PF3D7_0402400.1	>PF3D7_0402400.1-p1 | transcript=PF3D7_0402400.1 | gene=PF3D7_0402400 | organism=Plasmodium_falciparum_3D7 | gene_product=Plasmodium exported protein, unknown function | transcript_product=Plasmodium exported protein, unknown function | location=Pf3D7_04_v3:147490-148380(-) | protein_length=254 | sequence_SO=chromosome | SO=protein_coding | is_pseudo=false	5	5	5	5	5	5	5	5	5	5	5	5	60	747894	905107	793148	791880	966932	687456	840323	882431	772177	641566	799804	916912		809507	844285	782615	2.43641e+06		1.03436	1.0788		0.699782	0.477219
transcript=PF3D7_0403600.1	>PF3D7_0403600.1-p1 | transcript=PF3D7_0403600.1 | gene=PF3D7_0403600 | organism=Plasmodium_falciparum_3D7 | gene_product=conserved Plasmodium protein, unknown function | transcript_product=conserved Plasmodium protein, unknown function | location=Pf3D7_04_v3:197846-201208(-) | protein_length=768 | sequence_SO=chromosome | SO=protein_coding | is_pseudo=false	6	6	6	6	6	6	6	6	6	6	6	6	72	26360.8	28665.7	25733.9	15381.7	35447.8	26244.8	28107.6	21130	18055.7	22015.8	23940.7	19816.7		24035.5	27732.6	20957.2	72725.3		1.14689	1.32329		0.391954	0.102506
transcript=PF3D7_0404300.1	>PF3D7_0404300.1-p1 | transcript=PF3D7_0404300.1 | gene=PF3D7_0404300 | organism=Plasmodium_falciparum_3D7 | gene_product=conserved Plasmodium protein, unknown function | transcript_product=conserved Plasmodium protein, unknown function | location=Pf3D7_04_v3:234014-237013(-) | protein_length=631 | sequence_SO=chromosome | SO=protein_coding | is_pseudo=false	7	7	7	7	7	7	7	7	7	7	7	7	84	160296	214185	154511	144158	194018	148402	172403	173343	147179	131404	145291	178259		168288	172042	150533	490862		1.11794	1.14288		0.381222	0.164809
transcript=PF3D7_0404700.1	>PF3D7_0404700.1-p1 | transcript=PF3D7_0404700.1 | gene=PF3D7_0404700 | organism=Plasmodium_falciparum_3D7 | gene_product=dipeptidyl aminopeptidase 3 | transcript_product=dipeptidyl aminopeptidase 3 | location=Pf3D7_04_v3:260454-263418(-) | protein_length=939 | sequence_SO=chromosome | SO=protein_coding | is_pseudo=false	16	16	16	16	16	16	16	16	16	16	16	16	192	37366.8	850458	555628	519163	25007.1	18514.7	20133.5	14906.4	13189.3	537839	515682	14133.7		490654	19640.4	270211	780505		1.81582	0.0726855		0.364148	0.189432
transcript=PF3D7_0404900.1	>PF3D7_0404900.1-p1 | transcript=PF3D7_0404900.1 | gene=PF3D7_0404900 | organism=Plasmodium_falciparum_3D7 | gene_product=6-cysteine protein P41 | transcript_product=6-cysteine protein P41 | location=Pf3D7_04_v3:267244-268380(-) | protein_length=378 | sequence_SO=chromosome | SO=protein_coding | is_pseudo=false	21	21	21	21	21	21	21	21	21	21	21	21	252	134637	42385.5	137554	139909	124335	131580	138347	158308	142553	122704	93837	46782.8		113621	138142	101469	353233		1.11976	1.36142		0.713877	0.176571
transcript=PF3D7_0405100.1	>PF3D7_0405100.1-p1 | transcript=PF3D7_0405100.1 | gene=PF3D7_0405100 | organism=Plasmodium_falciparum_3D7 | gene_product=protein transport protein Sec24B, putative | transcript_product=protein transport protein Sec24B, putative | location=Pf3D7_04_v3:272255-276824(-) | protein_length=1350 | sequence_SO=chromosome | SO=protein_coding | is_pseudo=false	10	10	10	10	10	10	10	10	10	10	10	10	120	32136.2	31828.7	42669.2	44222.7	33898	44054.7	33813.7	38096.4	27259.1	38548	30356.9	27774.9		37714.2	37465.7	30984.7	106165		1.21719	1.20917		0.165283	0.118425
transcript=PF3D7_0405400.1	>PF3D7_0405400.1-p1 | transcript=PF3D7_0405400.1 | gene=PF3D7_0405400 | organism=Plasmodium_falciparum_3D7 | gene_product=pre-mRNA-processing-splicing factor 8, putative | transcript_product=pre-mRNA-processing-splicing factor 8, putative | location=Pf3D7_04_v3:291251-300976(+) | protein_length=3136 | sequence_SO=chromosome | SO=protein_coding | is_pseudo=false	48	48	48	48	48	48	48	48	48	48	48	48	576	152072	217623	173901	154569	173433	161622	183285	187558	152124	143011	135194	158476		174541	176475	147201	498217		1.18573	1.19887		0.169102	0.00921565
transcript=PF3D7_0405600.1	>PF3D7_0405600.1-p1 | transcript=PF3D7_0405600.1 | gene=PF3D7_0405600 | organism=Plasmodium_falciparum_3D7 | gene_product=TMEM33 domain-containing protein, putative | transcript_product=TMEM33 domain-containing protein, putative | location=Pf3D7_04_v3:303329-305343(+) | protein_length=315 | sequence_SO=chromosome | SO=protein_coding | is_pseudo=false	9	9	9	9	9	9	9	9	9	9	9	9	108	719907	1.07001e+06	464019	458625	963466	540309	835572	734234	652063	696034	647626	701615		678141	768396	674334	2.12087e+06		1.00565	1.13949		0.980654	0.37149
transcript=PF3D7_0405800.1	>PF3D7_0405800.1-p1 | transcript=PF3D7_0405800.1 | gene=PF3D7_0405800 | organism=Plasmodium_falciparum_3D7 | gene_product=conserved protein, unknown function | transcript_product=conserved protein, unknown function | location=Pf3D7_04_v3:315562-315870(+) | protein_length=102 | sequence_SO=chromosome | SO=protein_coding | is_pseudo=false	3	3	3	3	3	3	3	3	3	3	3	3	36	34184.3	90231.9	57021	46306.2	30823.7	57120.6	85385.4	16294.2	19542.9	64197.5	47294.4	15449.5		56935.8	47406	36621.1	140963		1.55473	1.2945		0.269991	0.594829
transcript=PF3D7_0405900.1	>PF3D7_0405900.1-p1 | transcript=PF3D7_0405900.1 | gene=PF3D7_0405900 | organism=Plasmodium_falciparum_3D7 | gene_product=apical sushi protein | transcript_product=apical sushi protein | location=Pf3D7_04_v3:316540-319178(-) | protein_length=731 | sequence_SO=chromosome | SO=protein_coding | is_pseudo=false	31	31	31	31	31	31	31	31	31	31	31	31	372	55458.3	77881.6	64493.5	62672.9	58674.4	57195.2	64530.3	66825.9	66271.6	61874.9	57350.1	64783.6		65126.5	61806.5	62570.1	189503		1.04086	0.987796		0.640679	0.809515
transcript=PF3D7_0406100.1	>PF3D7_0406100.1-p1 | transcript=PF3D7_0406100.1 | gene=PF3D7_0406100 | organism=Plasmodium_falciparum_3D7 | gene_product=V-type proton ATPase subunit B | transcript_product=V-type proton ATPase subunit B | location=Pf3D7_04_v3:323267-325225(-) | protein_length=494 | sequence_SO=chromosome | SO=protein_coding | is_pseudo=false	33	33	33	33	33	33	33	33	33	33	33	33	396	1203698	1.86704e+06	1.16247e+06	1.11239e+06	1.6081e+06	1.13107e+06	1.13643e+06	1.22837e+06	1.13408e+06	1.10767e+06	1.14132e+06	866001		1336398	1.27599e+06	1.06227e+06	3.67466e+06		1.25806	1.20119		0.225319	0.165057
transcript=PF3D7_0406200.1	>PF3D7_0406200.1-p1 | transcript=PF3D7_0406200.1 | gene=PF3D7_0406200 | organism=Plasmodium_falciparum_3D7 | gene_product=sexual stage-specific protein precursor | transcript_product=sexual stage-specific protein precursor | location=Pf3D7_04_v3:329216-329689(+) | protein_length=157 | sequence_SO=chromosome | SO=protein_coding | is_pseudo=false	8	8	8	8	8	8	8	8	8	8	8	8	96	72474	63197.4	75520.8	64308.2	67768.2	63574.8	80310.7	99868.1	15885.8	68053.5	85098.4	17023.2		68875.1	77880.4	46515.2	193271		1.4807	1.6743		0.297099	0.179133
transcript=PF3D7_0406400.1	>PF3D7_0406400.1-p1 | transcript=PF3D7_0406400.1 | gene=PF3D7_0406400 | organism=Plasmodium_falciparum_3D7 | gene_product=cytosolic glyoxalase II | transcript_product=cytosolic glyoxalase II | location=Pf3D7_04_v3:332043-333856(+) | protein_length=263 | sequence_SO=chromosome | SO=protein_coding | is_pseudo=false	13	13	13	13	13	13	13	13	13	13	13	13	156	352631	450743	336214	203397	409818	306699	364930	373587	381518	377493	313741	384233		335746	363758	364246	1.06375e+06		0.921757	0.998661		0.625465	0.986325
transcript=PF3D7_0406700.1	>PF3D7_0406700.1-p1 | transcript=PF3D7_0406700.1 | gene=PF3D7_0406700 | organism=Plasmodium_falciparum_3D7 | gene_product=conserved Plasmodium protein, unknown function | transcript_product=conserved Plasmodium protein, unknown function | location=Pf3D7_04_v3:347458-351499(+) | protein_length=847 | sequence_SO=chromosome | SO=protein_coding | is_pseudo=false	13	13	13	13	13	13	13	13	13	13	13	13	156	49085.6	93117.3	78346.5	61460.6	90778.3	84841.6	70087.5	74582.6	89327.7	56339.2	72489.7	29813.3		70502.5	80072.5	61992.5	212568		1.13728	1.29165		0.613324	0.255123
transcript=PF3D7_0407800.1	>PF3D7_0407800.1-p1 | transcript=PF3D7_0407800.1 | gene=PF3D7_0407800 | organism=Plasmodium_falciparum_3D7 | gene_product=conserved Plasmodium protein, unknown function | transcript_product=conserved Plasmodium protein, unknown function | location=Pf3D7_04_v3:384924-390806(+) | protein_length=1960 | sequence_SO=chromosome | SO=protein_coding | is_pseudo=false	37	37	37	37	37	37	37	37	37	37	37	37	444	246137	265508	196711	195927	316391	57516.7	258358	248767	63628.6	62858.2	186198	252407		226071	220258	141273	587602		1.60024	1.5591		0.16987	0.324088
transcript=PF3D7_0409100.1	>PF3D7_0409100.1-p1 | transcript=PF3D7_0409100.1 | gene=PF3D7_0409100 | organism=Plasmodium_falciparum_3D7 | gene_product=U4/U6 small nuclear ribonucleoprotein PRP31, putative | transcript_product=U4/U6 small nuclear ribonucleoprotein PRP31, putative | location=Pf3D7_04_v3:436217-437981(-) | protein_length=534 | sequence_SO=chromosome | SO=protein_coding | is_pseudo=false	5	5	5	5	5	5	5	5	5	5	5	5	60	325418	407328	275938	294680	368522	309515	303161	353209	377870	292749	291038	312268		325841	333602	318481	977924		1.02311	1.04748		0.843185	0.582666
transcript=PF3D7_0409400.1	>PF3D7_0409400.1-p1 | transcript=PF3D7_0409400.1 | gene=PF3D7_0409400 | organism=Plasmodium_falciparum_3D7 | gene_product=chaperone protein DnaJ | transcript_product=chaperone protein DnaJ | location=Pf3D7_04_v3:446000-448018(+) | protein_length=672 | sequence_SO=chromosome | SO=protein_coding | is_pseudo=false	14	14	14	14	14	14	14	14	14	14	14	14	168	43930.8	47456.2	29707.8	33333.3	43651.5	44127.9	35812.1	40871.8	42277	38161.2	38725.5	43674		38607	41115.8	40709.4	120432		0.948356	1.00998		0.662297	0.868125
transcript=PF3D7_0409600.1	>PF3D7_0409600.1-p1 | transcript=PF3D7_0409600.1 | gene=PF3D7_0409600 | organism=Plasmodium_falciparum_3D7 | gene_product=replication protein A1, large subunit | transcript_product=replication protein A1, large subunit | location=Pf3D7_04_v3:452134-455571(-) | protein_length=1145 | sequence_SO=chromosome | SO=protein_coding | is_pseudo=false	23	23	23	23	23	23	23	23	23	23	23	23	276	25434.9	20240.5	30489.1	46025.3	19595	26386.1	46612.2	21377.1	30484.5	48119.1	36408.6	41852.3		30547.4	28492.6	39216.1	98256.1		0.778951	0.726553		0.250891	0.20044
transcript=PF3D7_0410600.1	>PF3D7_0410600.1-p1 | transcript=PF3D7_0410600.1 | gene=PF3D7_0410600 | organism=Plasmodium_falciparum_3D7 | gene_product=conserved protein, unknown function | transcript_product=conserved protein, unknown function | location=Pf3D7_04_v3:479028-480468(+) | protein_length=326 | sequence_SO=chromosome | SO=protein_coding | is_pseudo=false	15	15	15	15	15	15	15	15	15	15	15	15	180	104996	36197.7	149370	112073	21272.1	64291.3	97791.3	37661.5	126293	61822.1	120695	115006		100659	55254.1	105954	261867		0.95003	0.521492		0.856841	0.064745
transcript=PF3D7_0410800.1	>PF3D7_0410800.1-p1 | transcript=PF3D7_0410800.1 | gene=PF3D7_0410800 | organism=Plasmodium_falciparum_3D7 | gene_product=conserved Plasmodium protein, unknown function | transcript_product=conserved Plasmodium protein, unknown function | location=Pf3D7_04_v3:485832-489728(+) | protein_length=1298 | sequence_SO=chromosome | SO=protein_coding | is_pseudo=false	58	58	58	58	58	58	58	58	58	58	58	58	696	3386899	343753	3627221	3.25133e+06	357777	252417	3.25605e+06	3887440	252878	265385	195015	3052755		2.6523e+06	1.93842e+06	941508	5.53223e+06		2.81708	2.05885		0.153418	0.43471
transcript=PF3D7_0411100.1	>PF3D7_0411100.1-p1 | transcript=PF3D7_0411100.1 | gene=PF3D7_0411100 | organism=Plasmodium_falciparum_3D7 | gene_product=mediator of RNA polymerase II transcription subunit 8, putative | transcript_product=mediator of RNA polymerase II transcription subunit 8, putative | location=Pf3D7_04_v3:504478-505095(-) | protein_length=205 | sequence_SO=chromosome | SO=protein_coding | is_pseudo=false	4	4	4	4	4	4	4	4	4	4	4	4	48	46234.2	39519.3	41230.8	43230.6	43915.6	37565.5	46948.7	42694.1	38385.5	35217.1	40541	27133.8		42553.7	42781	35319.4	120654		1.20483	1.21126		0.0860095	0.0858742
transcript=PF3D7_0412000.1	>PF3D7_0412000.1-p1 | transcript=PF3D7_0412000.1 | gene=PF3D7_0412000 | organism=Plasmodium_falciparum_3D7 | gene_product=LITAF-like zinc finger protein, putative | transcript_product=LITAF-like zinc finger protein, putative | location=Pf3D7_04_v3:536774-539110(+) | protein_length=778 | sequence_SO=chromosome | SO=protein_coding | is_pseudo=false	13	13	13	13	13	13	13	13	13	13	13	13	156	217974	276387	249035	227088	339616	210734	259860	271250	253064	207043	233609	244058		242621	270365	234444	747430		1.03488	1.15322		0.636617	0.276917
transcript=PF3D7_0413600.1	>PF3D7_0413600.1-p1 | transcript=PF3D7_0413600.1 | gene=PF3D7_0413600 | organism=Plasmodium_falciparum_3D7 | gene_product=26S protease regulatory subunit 6B, putative | transcript_product=26S protease regulatory subunit 6B, putative | location=Pf3D7_04_v3:616914-618350(-) | protein_length=392 | sequence_SO=chromosome | SO=protein_coding | is_pseudo=false	31	31	31	31	31	31	31	31	31	31	31	31	372	131014	147859	145247	193653	197068	182617	162895	182184	223746	173811	152730	213320		154443	181191	190902	526536		0.809019	0.949133		0.142801	0.619384
transcript=PF3D7_0413700.1	>PF3D7_0413700.1-p1 | transcript=PF3D7_0413700.1 | gene=PF3D7_0413700 | organism=Plasmodium_falciparum_3D7 | gene_product=lysine decarboxylase-like protein, putative | transcript_product=lysine decarboxylase-like protein, putative | location=Pf3D7_04_v3:619786-620802(-) | protein_length=338 | sequence_SO=chromosome | SO=protein_coding | is_pseudo=false	12	12	12	12	12	12	12	12	12	12	12	12	144	58435.9	43990.7	44813	70533.6	38269	68284.6	57964.2	47254.8	69836.9	74074.8	65437	61414.9		54443.3	52943.2	67690.9	175077		0.804293	0.782131		0.12454	0.104464
transcript=PF3D7_0413900.1	>PF3D7_0413900.1-p1 | transcript=PF3D7_0413900.1 | gene=PF3D7_0413900 | organism=Plasmodium_falciparum_3D7 | gene_product=ubiquitin carboxyl-terminal hydrolase 13, putative | transcript_product=ubiquitin carboxyl-terminal hydrolase 13, putative | location=Pf3D7_04_v3:623168-626226(-) | protein_length=853 | sequence_SO=chromosome | SO=protein_coding | is_pseudo=false	21	21	21	21	21	21	21	21	21	21	21	21	252	92689.8	42760.8	49898.2	107546	55736.8	76459.9	48690.7	59909.9	84529	85795.8	97291.7	52985.2		73223.6	60199.3	80150.4	213573		0.913578	0.751079		0.723893	0.134246
transcript=PF3D7_0414000.1	>PF3D7_0414000.1-p1 | transcript=PF3D7_0414000.1 | gene=PF3D7_0414000 | organism=Plasmodium_falciparum_3D7 | gene_product=structural maintenance of chromosomes protein 3, putative | transcript_product=structural maintenance of chromosomes protein 3, putative | location=Pf3D7_04_v3:626891-633126(-) | protein_length=1193 | sequence_SO=chromosome | SO=protein_coding | is_pseudo=false	45	45	45	45	45	45	45	45	45	45	45	45	540	142138	147260	172141	182734	114861	151044	134343	151283	151251	166504	126010	112840		161068	137883	139151	438102		1.15751	0.990887		0.21044	0.935115
transcript=PF3D7_0415000.1	>PF3D7_0415000.1-p1 | transcript=PF3D7_0415000.1 | gene=PF3D7_0415000 | organism=Plasmodium_falciparum_3D7 | gene_product=arsenical pump-driving ATPase, putative | transcript_product=arsenical pump-driving ATPase, putative | location=Pf3D7_04_v3:668578-669717(-) | protein_length=379 | sequence_SO=chromosome | SO=protein_coding | is_pseudo=false	15	15	15	15	15	15	15	15	15	15	15	15	180	130406	107159	79297.4	171629	148068	154090	117336	167231	115389	135224	137452	124331		122123	146681	128099	396903		0.953347	1.14506		0.784357	0.183214
transcript=PF3D7_0415200.1	>PF3D7_0415200.1-p1 | transcript=PF3D7_0415200.1 | gene=PF3D7_0415200 | organism=Plasmodium_falciparum_3D7 | gene_product=conserved Plasmodium protein, unknown function | transcript_product=conserved Plasmodium protein, unknown function | location=Pf3D7_04_v3:672500-679138(-) | protein_length=2212 | sequence_SO=chromosome | SO=protein_coding | is_pseudo=false	5	5	5	5	5	5	5	5	5	5	5	5	60	16244.1	1395245	13964.7	808165	899127	785562	487108	34289.7	938605	843489	12991.7	544281		558405	551522	584842	1.69477e+06		0.954796	0.943027		0.949246	0.910458
transcript=PF3D7_0415300.1	>PF3D7_0415300.1-p1 | transcript=PF3D7_0415300.1 | gene=PF3D7_0415300 | organism=Plasmodium_falciparum_3D7 | gene_product=cdc2-related protein kinase 3 | transcript_product=cdc2-related protein kinase 3 | location=Pf3D7_04_v3:681810-685968(+) | protein_length=1339 | sequence_SO=chromosome | SO=protein_coding | is_pseudo=false	6	6	6	6	6	6	6	6	6	6	6	6	72	54993.8	42126.2	57567.7	44795.1	18482.7	23514.7	26210.6	27815.4	23339.3	43178.1	71149.4	58248		49870.7	24005.8	48978.7	122855		1.01821	0.490128		0.939207	0.0910805
transcript=PF3D7_0415500.1	>PF3D7_0415500.1-p1 | transcript=PF3D7_0415500.1 | gene=PF3D7_0415500 | organism=Plasmodium_falciparum_3D7 | gene_product=nuclear cap-binding protein subunit 2, putative | transcript_product=nuclear cap-binding protein subunit 2, putative | location=Pf3D7_04_v3:688192-689053(+) | protein_length=234 | sequence_SO=chromosome | SO=protein_coding | is_pseudo=false	12	12	12	12	12	12	12	12	12	12	12	12	144	137559	77064.7	108097	130766	86202.8	122650	103765	99263.5	71818.6	101659	136169	73752.5		113372	102970	95849.7	312192		1.18281	1.07429		0.422128	0.692419
transcript=PF3D7_0415900.1	>PF3D7_0415900.1-p1 | transcript=PF3D7_0415900.1 | gene=PF3D7_0415900 | organism=Plasmodium_falciparum_3D7 | gene_product=60S ribosomal protein L15, putative | transcript_product=60S ribosomal protein L15, putative | location=Pf3D7_04_v3:697918-698768(-) | protein_length=205 | sequence_SO=chromosome | SO=protein_coding | is_pseudo=false	10	10	10	10	10	10	10	10	10	10	10	10	120	463139	217581	632938	616104	338514	691839	216388	91715.3	465921	799002	567725	430417		482441	334614	565766	1.38282e+06		0.852721	0.591435		0.536776	0.191526
transcript=PF3D7_0416400.1	>PF3D7_0416400.1-p1 | transcript=PF3D7_0416400.1 | gene=PF3D7_0416400 | organism=Plasmodium_falciparum_3D7 | gene_product=histone acetyltransferase, putative | transcript_product=histone acetyltransferase, putative | location=Pf3D7_04_v3:718202-722654(+) | protein_length=1259 | sequence_SO=chromosome | SO=protein_coding | is_pseudo=false	19	19	19	19	19	19	19	19	19	19	19	19	228	37902.8	32917.7	35847.4	51557.9	15712.4	51116.6	31401	50330.6	23003.9	44367	54419	46439.7		39556.5	37140.2	42057.4	118754		0.940535	0.883083		0.763793	0.66595
transcript=PF3D7_0416500.1	>PF3D7_0416500.1-p1 | transcript=PF3D7_0416500.1 | gene=PF3D7_0416500 | organism=Plasmodium_falciparum_3D7 | gene_product=repressor of RNA polymerase III transcription MAF1 | transcript_product=repressor of RNA polymerase III transcription MAF1 | location=Pf3D7_04_v3:723073-724242(-) | protein_length=389 | sequence_SO=chromosome | SO=protein_coding | is_pseudo=false	4	4	4	4	4	4	4	4	4	4	4	4	48	58467.6	55954.2	137358	17473	53955.5	52607.2	59960.1	75528.2	68475.7	50618.3	49059.8	62876.4		67313.1	60512.8	57757.5	185583		1.16544	1.0477		0.732259	0.710163
transcript=PF3D7_0416800.1	>PF3D7_0416800.1-p1 | transcript=PF3D7_0416800.1 | gene=PF3D7_0416800 | organism=Plasmodium_falciparum_3D7 | gene_product=small GTP-binding protein sar1 | transcript_product=small GTP-binding protein sar1 | location=Pf3D7_04_v3:729962-731223(+) | protein_length=192 | sequence_SO=chromosome | SO=protein_coding | is_pseudo=false	26	26	26	26	26	26	26	26	26	26	26	26	312	358546	348167	325425	277174	266574	428471	389710	317981	349442	407810	379261	336994		327328	350684	368377	1.04639e+06		0.888569	0.951972		0.139673	0.676905
transcript=PF3D7_0417200.1	>PF3D7_0417200.1-p1 | transcript=PF3D7_0417200.1 | gene=PF3D7_0417200 | organism=Plasmodium_falciparum_3D7 | gene_product=bifunctional dihydrofolate reductase-thymidylate synthase | transcript_product=bifunctional dihydrofolate reductase-thymidylate synthase | location=Pf3D7_04_v3:748088-749914(+) | protein_length=608 | sequence_SO=chromosome | SO=protein_coding | is_pseudo=false	19	19	19	19	19	19	19	19	19	19	19	19	228	1149540	1.45756e+06	1.29531e+06	1.23017e+06	1.35047e+06	1.24526e+06	1.47181e+06	1535127	1.15519e+06	1.10561e+06	1.15082e+06	1198446		1.28314e+06	1.40067e+06	1.15252e+06	3.83633e+06		1.11334	1.21531		0.137323	0.0262195
transcript=PF3D7_0417500.1	>PF3D7_0417500.1-p1 | transcript=PF3D7_0417500.1 | gene=PF3D7_0417500 | organism=Plasmodium_falciparum_3D7 | gene_product=memo-like protein | transcript_product=memo-like protein | location=Pf3D7_04_v3:777200-779424(-) | protein_length=296 | sequence_SO=chromosome | SO=protein_coding | is_pseudo=false	16	16	16	16	16	16	16	16	16	16	16	16	192	101287	23636	104699	92887.8	33714.7	119262	97328.5	31234.4	60974.5	89271.7	88763.3	66156.5		80627.4	70384.9	76291.5	227304		1.05683	0.922579		0.84348	0.815403
transcript=PF3D7_0418200.1	>PF3D7_0418200.1-p1 | transcript=PF3D7_0418200.1 | gene=PF3D7_0418200 | organism=Plasmodium_falciparum_3D7 | gene_product=eukaryotic translation initiation factor 3 subunit M, putative | transcript_product=eukaryotic translation initiation factor 3 subunit M, putative | location=Pf3D7_04_v3:817400-818689(+) | protein_length=429 | sequence_SO=chromosome | SO=protein_coding | is_pseudo=false	13	13	13	13	13	13	13	13	13	13	13	13	156	136373	28997.1	163523	69084.1	47941	66234.8	61170.7	59979	113501	167990	148942	117982		99494.2	58831.4	137104	295430		0.725684	0.429101		0.322407	0.00645442
transcript=PF3D7_0418500.1	>PF3D7_0418500.1-p1 | transcript=PF3D7_0418500.1 | gene=PF3D7_0418500 | organism=Plasmodium_falciparum_3D7 | gene_product=trafficking protein particle complex subunit 3, putative | transcript_product=trafficking protein particle complex subunit 3, putative | location=Pf3D7_04_v3:830989-832428(-) | protein_length=187 | sequence_SO=chromosome | SO=protein_coding | is_pseudo=false	3	3	3	3	3	3	3	3	3	3	3	3	36	392735	424075	459088	448782	332434	455495	443666	463461	450550	427485	402717	516214		431170	423764	449241	1.30418e+06		0.959774	0.943288		0.554119	0.541061
transcript=PF3D7_0419400.1	>PF3D7_0419400.1-p1 | transcript=PF3D7_0419400.1 | gene=PF3D7_0419400 | organism=Plasmodium_falciparum_3D7 | gene_product=conserved Plasmodium protein, unknown function | transcript_product=conserved Plasmodium protein, unknown function | location=Pf3D7_04_v3:857998-865957(+) | protein_length=2472 | sequence_SO=chromosome | SO=protein_coding | is_pseudo=false	21	21	21	21	21	21	21	21	21	21	21	21	252	17450.1	27361.4	29557.7	19667.8	15539.4	24826	16581.2	31487.9	24079.3	16347.7	33819.6	22190.7		23509.2	22108.6	24109.3	69727.2		0.975111	0.917016		0.902029	0.714866
transcript=PF3D7_0419500.1	>PF3D7_0419500.1-p1 | transcript=PF3D7_0419500.1 | gene=PF3D7_0419500 | organism=Plasmodium_falciparum_3D7 | gene_product=conserved Plasmodium membrane protein, unknown function | transcript_product=conserved Plasmodium membrane protein, unknown function | location=Pf3D7_04_v3:866501-868111(-) | protein_length=536 | sequence_SO=chromosome | SO=protein_coding | is_pseudo=false	8	8	8	8	8	8	8	8	8	8	8	8	96	200565	259271	178656	234228	260914	211882	174082	206389	180362	173351	181130	183846		218180	213317	179672	611169		1.21432	1.18725		0.118875	0.15662
transcript=PF3D7_0419600.1	>PF3D7_0419600.1-p1 | transcript=PF3D7_0419600.1 | gene=PF3D7_0419600 | organism=Plasmodium_falciparum_3D7 | gene_product=ran-specific GTPase-activating protein 1, putative | transcript_product=ran-specific GTPase-activating protein 1, putative | location=Pf3D7_04_v3:870737-871873(+) | protein_length=280 | sequence_SO=chromosome | SO=protein_coding | is_pseudo=false	22	22	22	22	22	22	22	22	22	22	22	22	264	2.71458e+06	3.58124e+06	2553341	2.61997e+06	3.29845e+06	2.43818e+06	2780203	3.01239e+06	3.20539e+06	2735663	2.7748e+06	3120970		2.86728e+06	2.88231e+06	2.95921e+06	8.70879e+06		0.968935	0.974013		0.74761	0.737797
transcript=PF3D7_0420600.1	>PF3D7_0420600.1-p1 | transcript=PF3D7_0420600.1 | gene=PF3D7_0420600 | organism=Plasmodium_falciparum_3D7 | gene_product=conserved Plasmodium protein, unknown function | transcript_product=conserved Plasmodium protein, unknown function | location=Pf3D7_04_v3:932463-934244(+) | protein_length=593 | sequence_SO=chromosome | SO=protein_coding | is_pseudo=false	22	22	22	22	22	22	22	22	22	22	22	22	264	121187	181970	27534.9	115464	134603	137082	154883	154501	99832.2	101962	115206	106065		111539	145267	105766	362573		1.05458	1.37347		0.867974	0.00164481
transcript=PF3D7_0422100.1	>PF3D7_0422100.1-p1 | transcript=PF3D7_0422100.1 | gene=PF3D7_0422100 | organism=Plasmodium_falciparum_3D7 | gene_product=transmembrane emp24 domain-containing protein, putative | transcript_product=transmembrane emp24 domain-containing protein, putative | location=Pf3D7_04_v3:1001613-1002770(+) | protein_length=385 | sequence_SO=chromosome | SO=protein_coding | is_pseudo=false	10	10	10	10	10	10	10	10	10	10	10	10	120	84259.5	87539.2	73489.4	88178.6	88485.6	70297.2	83027.7	81890.4	110969	81628.2	91062.2	105776		83366.7	80925.2	97358.7	261651		0.856284	0.831207		0.129928	0.0899621
transcript=PF3D7_0422300.1	>PF3D7_0422300.1-p1 | transcript=PF3D7_0422300.1 | gene=PF3D7_0422300 | organism=Plasmodium_falciparum_3D7 | gene_product=alpha tubulin 2 | transcript_product=alpha tubulin 2 | location=Pf3D7_04_v3:1022487-1024166(+) | protein_length=450 | sequence_SO=chromosome | SO=protein_coding | is_pseudo=false	4	4	4	4	4	4	4	4	4	4	4	4	48	58428.3	30254.5	30284.5	61467.2	12815.5	29694.9	30855.2	22844.6	58549.4	35399	59029.2	21660.3		45108.6	24052.5	43659.5	112821		1.03319	0.550912		0.911983	0.120311
transcript=PF3D7_0422400.1	>PF3D7_0422400.1-p1 | transcript=PF3D7_0422400.1 | gene=PF3D7_0422400 | organism=Plasmodium_falciparum_3D7 | gene_product=40S ribosomal protein S19 | transcript_product=40S ribosomal protein S19 | location=Pf3D7_04_v3:1026648-1027399(+) | protein_length=170 | sequence_SO=chromosome | SO=protein_coding | is_pseudo=false	22	22	22	22	22	22	22	22	22	22	22	22	264	4.51925e+06	7133302	5403699	5.5232e+06	4.56309e+06	4856268	5983469	5151783	4.88121e+06	4936709	4.45878e+06	4.91688e+06		5.64486e+06	5.13865e+06	4.7984e+06	1.55819e+07		1.17641	1.07091		0.218162	0.35903
transcript=PF3D7_0422500.1	>PF3D7_0422500.1-p1 | transcript=PF3D7_0422500.1 | gene=PF3D7_0422500 | organism=Plasmodium_falciparum_3D7 | gene_product=pre-mRNA-splicing helicase BRR2, putative | transcript_product=pre-mRNA-splicing helicase BRR2, putative | location=Pf3D7_04_v3:1029329-1037953(+) | protein_length=2874 | sequence_SO=chromosome | SO=protein_coding | is_pseudo=false	42	42	42	42	42	42	42	42	42	42	42	42	504	643518	891134	558727	618416	680108	626217	708834	802532	665834	622158	624037	668378		677949	704423	645102	2.02747e+06		1.05092	1.09196		0.686961	0.208883
transcript=PF3D7_0423500.1	>PF3D7_0423500.1-p1 | transcript=PF3D7_0423500.1 | gene=PF3D7_0423500 | organism=Plasmodium_falciparum_3D7 | gene_product=glideosome associated protein with multiple membrane spans 2 | transcript_product=glideosome associated protein with multiple membrane spans 2 | location=Pf3D7_04_v3:1058997-1060551(+) | protein_length=372 | sequence_SO=chromosome | SO=protein_coding | is_pseudo=false	10	10	10	10	10	10	10	10	10	10	10	10	120	73339.8	90840.9	68265.8	79621.4	88005.8	55487	84843.7	74329.3	71025.5	61871.6	73939	80179.4		78017	75666.5	71753.9	225437		1.08729	1.05453		0.351929	0.657908
transcript=PF3D7_0423600.1	>PF3D7_0423600.1-p1 | transcript=PF3D7_0423600.1 | gene=PF3D7_0423600 | organism=Plasmodium_falciparum_3D7 | gene_product=conserved Plasmodium protein, unknown function | transcript_product=conserved Plasmodium protein, unknown function | location=Pf3D7_04_v3:1061790-1066628(-) | protein_length=1612 | sequence_SO=chromosome | SO=protein_coding | is_pseudo=false	13	13	13	13	13	13	13	13	13	13	13	13	156	1.7266e+06	1.8952e+06	1.77971e+06	1.59191e+06	1.7982e+06	1.35624e+06	1.40217e+06	1.97037e+06	26473	1.26254e+06	1.49373e+06	1.21669e+06		1.74835e+06	1.63175e+06	999858	4.37996e+06		1.7486	1.63198		0.106214	0.15312
transcript=PF3D7_0423700.1	>PF3D7_0423700.1-p1 | transcript=PF3D7_0423700.1 | gene=PF3D7_0423700 | organism=Plasmodium_falciparum_3D7 | gene_product=early transcribed membrane protein 4 | transcript_product=early transcribed membrane protein 4 | location=Pf3D7_04_v3:1071435-1071845(-) | protein_length=136 | sequence_SO=chromosome | SO=protein_coding | is_pseudo=false	4	4	4	4	4	4	4	4	4	4	4	4	48	11019267	13076202	6.92903e+06	6586000	12435929	7.88429e+06	10956939	9756836	9348668	8.12295e+06	7.29968e+06	8161710		9.40262e+06	1.02585e+07	8.23325e+06	2.78944e+07		1.14203	1.24598		0.52151	0.124295
transcript=PF3D7_0424600.1	>PF3D7_0424600.1-p1 | transcript=PF3D7_0424600.1 | gene=PF3D7_0424600 | organism=Plasmodium_falciparum_3D7 | gene_product=Plasmodium exported protein (PHISTb), unknown function | transcript_product=Plasmodium exported protein (PHISTb), unknown function | location=Pf3D7_04_v3:1113345-1114486(-) | protein_length=309 | sequence_SO=chromosome | SO=protein_coding | is_pseudo=false	37	37	37	37	37	37	37	37	37	37	37	37	444	129537	151312	52341.9	67583.7	77990.2	65915.7	68827.7	48230.7	98451.9	135310	74685	50406.9		100194	65241.1	89713.6	255148		1.11682	0.727215		0.739076	0.275114
transcript=PF3D7_0500800.1	>PF3D7_0500800.1-p1 | transcript=PF3D7_0500800.1 | gene=PF3D7_0500800 | organism=Plasmodium_falciparum_3D7 | gene_product=mature parasite-infected erythrocyte surface antigen | transcript_product=mature parasite-infected erythrocyte surface antigen | location=Pf3D7_05_v3:43327-47761(-) | protein_length=1434 | sequence_SO=chromosome | SO=protein_coding | is_pseudo=false	158	158	158	158	158	158	158	158	158	158	158	158	1896	37700176	37997312	33826528	34006072	46621292	29455078	31201278	38478952	36687276	30885174	28716416	29132170		35882522	36439150	31355259	103676931		1.14439	1.16214		0.0903817	0.301413
transcript=PF3D7_0501000.1	>PF3D7_0501000.1-p1 | transcript=PF3D7_0501000.1 | gene=PF3D7_0501000 | organism=Plasmodium_falciparum_3D7 | gene_product=Plasmodium exported protein, unknown function | transcript_product=Plasmodium exported protein, unknown function | location=Pf3D7_05_v3:55841-56872(+) | protein_length=260 | sequence_SO=chromosome | SO=protein_coding | is_pseudo=false	12	12	12	12	12	12	12	12	12	12	12	12	144	1.44189e+06	1288463	1539026	1.42596e+06	1.26845e+06	1.4585e+06	1.23352e+06	1.49521e+06	1.42665e+06	1.11823e+06	1.19865e+06	1.113e+06		1.42383e+06	1.36392e+06	1.21413e+06	4.00189e+06		1.17272	1.12337		0.0631358	0.180817
transcript=PF3D7_0501100.1;transcript=PF3D7_0501100.2	>PF3D7_0501100.1-p1 | transcript=PF3D7_0501100.1 | gene=PF3D7_0501100 | organism=Plasmodium_falciparum_3D7 | gene_product=heat shock protein 40, type II | transcript_product=heat shock protein 40, type II | location=Pf3D7_05_v3:58037-59726(-) | protein_length=402 | sequence_SO=chromosome | SO=protein_coding | is_pseudo=false;>PF3D7_0501100.2-p1 | transcript=PF3D7_0501100.2 | gene=PF3D7_0501100 | …	17	17	17	17	17	17	17	17	17	17	17	17	204	758148	671010	662699	820627	620912	611465	500010	858956	546347	629964	740857	722131		728121	647835	659825	2.03578e+06		1.10351	0.981829		0.289406	0.896931
transcript=PF3D7_0501200.1	>PF3D7_0501200.1-p1 | transcript=PF3D7_0501200.1 | gene=PF3D7_0501200 | organism=Plasmodium_falciparum_3D7 | gene_product=parasite-infected erythrocyte surface protein | transcript_product=parasite-infected erythrocyte surface protein | location=Pf3D7_05_v3:64065-65489(+) | protein_length=408 | sequence_SO=chromosome | SO=protein_coding | is_pseudo=false	24	24	24	24	24	24	24	24	24	24	24	24	288	327779	384366	316213	316175	356547	317475	326670	350341	311058	285335	294421	301344		336133	337758	298040	971931		1.12781	1.13327		0.0973162	0.0152773
transcript=PF3D7_0501300.1	>PF3D7_0501300.1-p1 | transcript=PF3D7_0501300.1 | gene=PF3D7_0501300 | organism=Plasmodium_falciparum_3D7 | gene_product=skeleton-binding protein 1 | transcript_product=skeleton-binding protein 1 | location=Pf3D7_05_v3:68930-70113(+) | protein_length=337 | sequence_SO=chromosome | SO=protein_coding | is_pseudo=false	8	8	8	8	8	8	8	8	8	8	8	8	96	2.00156e+06	2.48667e+06	2.60091e+06	2.41738e+06	2.61102e+06	2.37514e+06	2.39147e+06	3039586	2.38495e+06	2.11281e+06	2.94495e+06	2895636		2.37663e+06	2.6043e+06	2.58459e+06	7.56552e+06		0.91954	1.00763		0.425644	0.940901
transcript=PF3D7_0501500.1	>PF3D7_0501500.1-p1 | transcript=PF3D7_0501500.1 | gene=PF3D7_0501500 | organism=Plasmodium_falciparum_3D7 | gene_product=rhoptry-associated protein 3 | transcript_product=rhoptry-associated protein 3 | location=Pf3D7_05_v3:81134-82336(-) | protein_length=400 | sequence_SO=chromosome | SO=protein_coding | is_pseudo=false	20	20	20	20	20	20	20	20	20	20	20	20	240	31379.4	24763.3	44522.7	35737.7	26374.1	36532.3	31217.2	21465.5	18848.8	35468.2	42109.7	18717.9		34100.8	28897.3	28786.2	91784.2		1.18462	1.00386		0.493457	0.987562
transcript=PF3D7_0501600.1	>PF3D7_0501600.1-p1 | transcript=PF3D7_0501600.1 | gene=PF3D7_0501600 | organism=Plasmodium_falciparum_3D7 | gene_product=rhoptry-associated protein 2 | transcript_product=rhoptry-associated protein 2 | location=Pf3D7_05_v3:84041-85237(-) | protein_length=398 | sequence_SO=chromosome | SO=protein_coding | is_pseudo=false	24	24	24	24	24	24	24	24	24	24	24	24	288	22979.4	33126.7	37088.3	43160.9	28969.2	51613.2	29085.2	21357.1	32471.5	48065	42533.2	28259.6		34088.8	32756.2	37832.3	104677		0.901051	0.865826		0.568825	0.550031
transcript=PF3D7_0501800.1	>PF3D7_0501800.1-p1 | transcript=PF3D7_0501800.1 | gene=PF3D7_0501800 | organism=Plasmodium_falciparum_3D7 | gene_product=chromatin assembly factor 1 subunit A | transcript_product=chromatin assembly factor 1 subunit A | location=Pf3D7_05_v3:91361-94591(+) | protein_length=1076 | sequence_SO=chromosome | SO=protein_coding | is_pseudo=false	20	20	20	20	20	20	20	20	20	20	20	20	240	131364	175343	113550	114708	145404	117910	129746	141296	132351	134115	131118	136260		133741	133589	133461	400791		1.0021	1.00096		0.985776	0.984971
transcript=PF3D7_0502100.1	>PF3D7_0502100.1-p1 | transcript=PF3D7_0502100.1 | gene=PF3D7_0502100 | organism=Plasmodium_falciparum_3D7 | gene_product=HCNGP-like protein | transcript_product=HCNGP-like protein | location=Pf3D7_05_v3:102193-102897(-) | protein_length=234 | sequence_SO=chromosome | SO=protein_coding | is_pseudo=false	5	5	5	5	5	5	5	5	5	5	5	5	60	142159	234730	203881	182068	226715	199929	197277	222528	281669	221704	180717	237022		190709	211612	230278	632599		0.82817	0.918941		0.214855	0.450053
transcript=PF3D7_0503200.1	>PF3D7_0503200.1-p1 | transcript=PF3D7_0503200.1 | gene=PF3D7_0503200 | organism=Plasmodium_falciparum_3D7 | gene_product=conserved Plasmodium protein, unknown function | transcript_product=conserved Plasmodium protein, unknown function | location=Pf3D7_05_v3:130453-133392(+) | protein_length=979 | sequence_SO=chromosome | SO=protein_coding | is_pseudo=false	9	9	9	9	9	9	9	9	9	9	9	9	108	47361.9	44526.2	55391.9	52262.5	22597.3	21373.8	41553.4	45658.4	24963.2	24598.9	49526.8	33136.4		49885.6	32795.7	33056.3	115738		1.50911	0.992116		0.0560349	0.976778
transcript=PF3D7_0503300.1	>PF3D7_0503300.1-p1 | transcript=PF3D7_0503300.1 | gene=PF3D7_0503300 | organism=Plasmodium_falciparum_3D7 | gene_product=serine/arginine-rich splicing factor 12 | transcript_product=serine/arginine-rich splicing factor 12 | location=Pf3D7_05_v3:135004-135930(-) | protein_length=308 | sequence_SO=chromosome | SO=protein_coding | is_pseudo=false	11	11	11	11	11	11	11	11	11	11	11	11	132	1.13549e+06	1.34029e+06	1.16174e+06	1.04703e+06	1.20952e+06	1.10508e+06	1.18212e+06	1233549	1.21982e+06	1.04276e+06	1.09307e+06	1.20991e+06		1.17114e+06	1.18257e+06	1.14139e+06	3.4951e+06		1.02606	1.03608		0.708387	0.462301
transcript=PF3D7_0503400.1	>PF3D7_0503400.1-p1 | transcript=PF3D7_0503400.1 | gene=PF3D7_0503400 | organism=Plasmodium_falciparum_3D7 | gene_product=actin-depolymerizing factor 1 | transcript_product=actin-depolymerizing factor 1 | location=Pf3D7_05_v3:140710-141471(+) | protein_length=122 | sequence_SO=chromosome | SO=protein_coding | is_pseudo=false	6	6	6	6	6	6	6	6	6	6	6	6	72	1419099	1.11422e+06	1.68057e+06	1.73792e+06	627826	941136	1.53343e+06	1.23304e+06	1.04592e+06	1.00689e+06	1.40647e+06	1.59745e+06		1.48795e+06	1.08386e+06	1.26418e+06	3.83599e+06		1.17701	0.857361		0.31015	0.485276
transcript=PF3D7_0503800.1	>PF3D7_0503800.1-p1 | transcript=PF3D7_0503800.1 | gene=PF3D7_0503800 | organism=Plasmodium_falciparum_3D7 | gene_product=60S ribosomal protein L31 | transcript_product=60S ribosomal protein L31 | location=Pf3D7_05_v3:151422-152384(-) | protein_length=120 | sequence_SO=chromosome | SO=protein_coding | is_pseudo=false	9	9	9	9	9	9	9	9	9	9	9	9	108	408702	322745	422190	491032	25663.3	537440	390802	263771	514170	666559	581706	497381		411167	304419	564954	1.28054e+06		0.727789	0.538839		0.025149	0.0908529
transcript=PF3D7_0504800.1	>PF3D7_0504800.1-p1 | transcript=PF3D7_0504800.1 | gene=PF3D7_0504800 | organism=Plasmodium_falciparum_3D7 | gene_product=conserved Plasmodium protein, unknown function | transcript_product=conserved Plasmodium protein, unknown function | location=Pf3D7_05_v3:187813-204732(-) | protein_length=5639 | sequence_SO=chromosome | SO=protein_coding | is_pseudo=false	37	37	37	37	37	37	37	37	37	37	37	37	444	28308.4	75696.3	33635.3	33343.7	70663.1	22540.9	28776.4	28642.3	24619.5	25434.7	28766.7	26461.8		42746	37655.7	26320.7	106722		1.62404	1.43065		0.233955	0.382744
transcript=PF3D7_0505000.1	>PF3D7_0505000.1-p1 | transcript=PF3D7_0505000.1 | gene=PF3D7_0505000 | organism=Plasmodium_falciparum_3D7 | gene_product=MMS19-like protein, putative | transcript_product=MMS19-like protein, putative | location=Pf3D7_05_v3:209062-218189(-) | protein_length=2975 | sequence_SO=chromosome | SO=protein_coding | is_pseudo=false	3	3	3	3	3	3	3	3	3	3	3	3	36	28775.5	16574.5	14084.7	19950.7	25456.8	63372.9	23548.5	21950.7	24690.7	29938.1	62838.7	25340.2		19846.3	33582.2	35701.9	89130.5		0.555889	0.940628		0.18147	0.880441
transcript=PF3D7_0505100.1	>PF3D7_0505100.1-p1 | transcript=PF3D7_0505100.1 | gene=PF3D7_0505100 | organism=Plasmodium_falciparum_3D7 | gene_product=trafficking protein particle complex subunit 8, putative | transcript_product=trafficking protein particle complex subunit 8, putative | location=Pf3D7_05_v3:220839-229253(+) | protein_length=2754 | sequence_SO=chromosome | SO=protein_coding | is_pseudo=false	18	18	18	18	18	18	18	18	18	18	18	18	216	1.52795e+06	1.99903e+06	1.24089e+06	1.3856e+06	2.06013e+06	1.33156e+06	1.62656e+06	1.55915e+06	1.82069e+06	1.46338e+06	1526524	1.66656e+06		1.53837e+06	1644349	1.61929e+06	4.80201e+06		0.950027	1.01548		0.678811	0.890276
transcript=PF3D7_0505200.1	>PF3D7_0505200.1-p1 | transcript=PF3D7_0505200.1 | gene=PF3D7_0505200 | organism=Plasmodium_falciparum_3D7 | gene_product=actin-like protein, putative | transcript_product=actin-like protein, putative | location=Pf3D7_05_v3:230695-232392(+) | protein_length=565 | sequence_SO=chromosome | SO=protein_coding | is_pseudo=false	16	16	16	16	16	16	16	16	16	16	16	16	192	46242.4	48318.1	41699.9	46901.1	51026.1	44429.4	41083.7	42246	39990.4	54413.5	47555.4	44034.6		45790.4	44696.3	46498.5	136985		0.984771	0.961242		0.843519	0.651879
transcript=PF3D7_0505500.1	>PF3D7_0505500.1-p1 | transcript=PF3D7_0505500.1 | gene=PF3D7_0505500 | organism=Plasmodium_falciparum_3D7 | gene_product=DNA mismatch repair protein MSH6, putative | transcript_product=DNA mismatch repair protein MSH6, putative | location=Pf3D7_05_v3:239456-243880(-) | protein_length=1350 | sequence_SO=chromosome | SO=protein_coding | is_pseudo=false	47	47	47	47	47	47	47	47	47	47	47	47	564	84698.7	72215.1	87488.7	95214.2	90794.8	78079.4	102188	81241.6	91146.7	100885	83185.2	93943.1		84904.2	88075.8	92290	265270		0.919972	0.954338		0.268757	0.546644
transcript=PF3D7_0505700.1	>PF3D7_0505700.1-p1 | transcript=PF3D7_0505700.1 | gene=PF3D7_0505700 | organism=Plasmodium_falciparum_3D7 | gene_product=conserved Plasmodium membrane protein, unknown function | transcript_product=conserved Plasmodium membrane protein, unknown function | location=Pf3D7_05_v3:247801-250575(-) | protein_length=924 | sequence_SO=chromosome | SO=protein_coding | is_pseudo=false	19	19	19	19	19	19	19	19	19	19	19	19	228	92425	114569	88737.2	77161.5	89145	77873.7	103642	98886.1	99359.7	77872.6	87352.8	95065		93223.2	92386.6	89912.5	275522		1.03682	1.02752		0.7321	0.749929
transcript=PF3D7_0505800.1	>PF3D7_0505800.1-p1 | transcript=PF3D7_0505800.1 | gene=PF3D7_0505800 | organism=Plasmodium_falciparum_3D7 | gene_product=small ubiquitin-related modifier | transcript_product=small ubiquitin-related modifier | location=Pf3D7_05_v3:252047-252606(-) | protein_length=100 | sequence_SO=chromosome | SO=protein_coding | is_pseudo=false	15	15	15	15	15	15	15	15	15	15	15	15	180	5.02686e+06	6456831	4808551	4684468	5779276	4.25472e+06	5015140	5.15837e+06	5097428	4417643	4614004	4.88284e+06		5.24418e+06	5.05188e+06	4.75298e+06	1.5049e+07		1.10335	1.06289		0.326946	0.434414
transcript=PF3D7_0506100.1	>PF3D7_0506100.1-p1 | transcript=PF3D7_0506100.1 | gene=PF3D7_0506100 | organism=Plasmodium_falciparum_3D7 | gene_product=60S ribosomal subunit protein L24, putative | transcript_product=60S ribosomal subunit protein L24, putative | location=Pf3D7_05_v3:257748-258831(-) | protein_length=204 | sequence_SO=chromosome | SO=protein_coding | is_pseudo=false	6	6	6	6	6	6	6	6	6	6	6	6	72	177335	245045	176366	164292	240833	174274	199326	225639	197751	182981	171534	180248		190760	210018	183128	583906		1.04167	1.14683		0.712911	0.164576
transcript=PF3D7_0506800.1	>PF3D7_0506800.1-p1 | transcript=PF3D7_0506800.1 | gene=PF3D7_0506800 | organism=Plasmodium_falciparum_3D7 | gene_product=transcription factor 25, putative | transcript_product=transcription factor 25, putative | location=Pf3D7_05_v3:284691-288023(+) | protein_length=929 | sequence_SO=chromosome | SO=protein_coding | is_pseudo=false	6	6	6	6	6	6	6	6	6	6	6	6	72	59011.4	17858.7	52170	50474.8	63880.6	16235.6	9997.53	58588	141197	53706.5	50314.3	21181.9		44878.7	37175.5	66600	148654		0.673855	0.55819		0.476583	0.367231
transcript=PF3D7_0506900.1	>PF3D7_0506900.1-p1 | transcript=PF3D7_0506900.1 | gene=PF3D7_0506900 | organism=Plasmodium_falciparum_3D7 | gene_product=rhomboid protease ROM4 | transcript_product=rhomboid protease ROM4 | location=Pf3D7_05_v3:288776-291055(-) | protein_length=759 | sequence_SO=chromosome | SO=protein_coding | is_pseudo=false	27	27	27	27	27	27	27	27	27	27	27	27	324	273926	362516	228925	212885	323695	209562	245976	270765	324973	199584	244865	319441		269563	262500	272216	804278		0.990255	0.964307		0.955163	0.810334
transcript=PF3D7_0507100.1	>PF3D7_0507100.1-p1 | transcript=PF3D7_0507100.1 | gene=PF3D7_0507100 | organism=Plasmodium_falciparum_3D7 | gene_product=60S ribosomal protein L4 | transcript_product=60S ribosomal protein L4 | location=Pf3D7_05_v3:294668-295903(-) | protein_length=411 | sequence_SO=chromosome | SO=protein_coding | is_pseudo=false	33	33	33	33	33	33	33	33	33	33	33	33	396	1.75778e+06	1555788	1.99375e+06	1948983	1.76272e+06	2.01068e+06	1.84388e+06	1.60927e+06	1.90377e+06	1.94306e+06	2.03226e+06	1.80253e+06		1.81407e+06	1.80664e+06	1.92041e+06	5.54112e+06		0.94463	0.940759		0.388476	0.292736
transcript=PF3D7_0507600.1	>PF3D7_0507600.1-p1 | transcript=PF3D7_0507600.1 | gene=PF3D7_0507600 | organism=Plasmodium_falciparum_3D7 | gene_product=protein CAF40, putative | transcript_product=protein CAF40, putative | location=Pf3D7_05_v3:313199-315157(+) | protein_length=652 | sequence_SO=chromosome | SO=protein_coding | is_pseudo=false	11	11	11	11	11	11	11	11	11	11	11	11	132	124821	188628	117934	119644	159410	111263	113626	158507	148565	127815	108047	161553		137757	135701	136495	409953		1.00925	0.994187		0.953569	0.966018
transcript=PF3D7_0507700.1	>PF3D7_0507700.1-p1 | transcript=PF3D7_0507700.1 | gene=PF3D7_0507700 | organism=Plasmodium_falciparum_3D7 | gene_product=nuclear protein localization protein 4, putative | transcript_product=nuclear protein localization protein 4, putative | location=Pf3D7_05_v3:316766-318361(-) | protein_length=531 | sequence_SO=chromosome | SO=protein_coding | is_pseudo=false	18	18	18	18	18	18	18	18	18	18	18	18	216	347945	222491	312586	350404	265278	301105	281024	326035	227919	302620	320654	337881		308357	293361	297269	898986		1.0373	0.986854		0.783283	0.893136
transcript=PF3D7_0507800.1	>PF3D7_0507800.1-p1 | transcript=PF3D7_0507800.1 | gene=PF3D7_0507800 | organism=Plasmodium_falciparum_3D7 | gene_product=conserved protein, unknown function | transcript_product=conserved protein, unknown function | location=Pf3D7_05_v3:322239-326822(+) | protein_length=1527 | sequence_SO=chromosome | SO=protein_coding | is_pseudo=false	17	17	17	17	17	17	17	17	17	17	17	17	204	83931.5	107055	105522	87164.4	111315	81607	84143.7	106733	70220.8	73575.5	73819.7	62964.6		95918.2	95949.5	70145.1	262013		1.36743	1.36787		0.0167589	0.0369977
transcript=PF3D7_0508000.1	>PF3D7_0508000.1-p1 | transcript=PF3D7_0508000.1 | gene=PF3D7_0508000 | organism=Plasmodium_falciparum_3D7 | gene_product=6-cysteine protein | transcript_product=6-cysteine protein | location=Pf3D7_05_v3:328666-329715(-) | protein_length=349 | sequence_SO=chromosome | SO=protein_coding | is_pseudo=false	15	15	15	15	15	15	15	15	15	15	15	15	180	179948	181996	249039	267264	207668	166325	225442	285471	254819	194084	222060	252180		219562	221226	230786	671574		0.951366	0.95858		0.691902	0.752122
transcript=PF3D7_0508600.1	>PF3D7_0508600.1-p1 | transcript=PF3D7_0508600.1 | gene=PF3D7_0508600 | organism=Plasmodium_falciparum_3D7 | gene_product=conserved protein, unknown function | transcript_product=conserved protein, unknown function | location=Pf3D7_05_v3:356222-357010(+) | protein_length=262 | sequence_SO=chromosome | SO=protein_coding | is_pseudo=false	1	1	1	1	1	1	1	1	1	1	1	1	12	33830.7	56236.3	50669	40075.8	45729.7	35819.8	41317.7	55249.5	42632.5	46850.4	37777.1	50592.5		45203	44529.2	44463.1	134195		1.01664	1.00149		0.90323	0.989845
transcript=PF3D7_0508800.1	>PF3D7_0508800.1-p1 | transcript=PF3D7_0508800.1 | gene=PF3D7_0508800 | organism=Plasmodium_falciparum_3D7 | gene_product=single-stranded DNA-binding protein | transcript_product=single-stranded DNA-binding protein | location=Pf3D7_05_v3:363588-364442(-) | protein_length=284 | sequence_SO=chromosome | SO=protein_coding | is_pseudo=false	9	9	9	9	9	9	9	9	9	9	9	9	108	183609	215224	186635	199745	201400	159570	213371	230865	260682	164671	218369	243980		196303	201301	221926	619530		0.884546	0.907068		0.317129	0.4588
transcript=PF3D7_0508900.1	>PF3D7_0508900.1-p1 | transcript=PF3D7_0508900.1 | gene=PF3D7_0508900 | organism=Plasmodium_falciparum_3D7 | gene_product=conserved Plasmodium protein, unknown function | transcript_product=conserved Plasmodium protein, unknown function | location=Pf3D7_05_v3:367022-376426(+) | protein_length=3134 | sequence_SO=chromosome | SO=protein_coding | is_pseudo=false	47	47	47	47	47	47	47	47	47	47	47	47	564	46807.9	21915.6	23170.5	22740.8	22146.8	26465.4	56809.8	27264	25917.9	31549.2	20641.8	29594.3		28658.7	33171.5	26925.8	88756		1.06436	1.23196		0.803596	0.499279
transcript=PF3D7_0509400.1	>PF3D7_0509400.1-p1 | transcript=PF3D7_0509400.1 | gene=PF3D7_0509400 | organism=Plasmodium_falciparum_3D7 | gene_product=RNA polymerase I | transcript_product=RNA polymerase I | location=Pf3D7_05_v3:389914-398997(-) | protein_length=2914 | sequence_SO=chromosome | SO=protein_coding | is_pseudo=false	6	6	6	6	6	6	6	6	6	6	6	6	72	376213	302629	288628	328611	319569	311251	363498	391381	36949.4	259245	258327	13240.5		324020	346425	141940	812385		2.28279	2.44063		0.0697392	0.0519318
transcript=PF3D7_0509800.1	>PF3D7_0509800.1-p1 | transcript=PF3D7_0509800.1 | gene=PF3D7_0509800 | organism=Plasmodium_falciparum_3D7 | gene_product=phosphatidylinositol 4-kinase | transcript_product=phosphatidylinositol 4-kinase | location=Pf3D7_05_v3:410268-415308(+) | protein_length=1559 | sequence_SO=chromosome | SO=protein_coding | is_pseudo=false	2	2	2	2	2	2	2	2	2	2	2	2	24	47436.8	68513.8	41005.5	66065.4	48507.1	61421.8	23732.9	93229.4	44170	22894.3	18777.1	86568.2		55755.4	56722.8	43102.4	155581		1.29356	1.316		0.495713	0.544717
transcript=PF3D7_0510100.1	>PF3D7_0510100.1-p1 | transcript=PF3D7_0510100.1 | gene=PF3D7_0510100 | organism=Plasmodium_falciparum_3D7 | gene_product=conserved protein, unknown function | transcript_product=conserved protein, unknown function | location=Pf3D7_05_v3:422746-430353(-) | protein_length=2535 | sequence_SO=chromosome | SO=protein_coding | is_pseudo=false	65	65	65	65	65	65	65	65	65	65	65	65	780	507784	552026	438786	434069	527719	424624	522607	504440	564627	460932	455686	527734		483166	494847	502245	1.48026e+06		0.962014	0.985271		0.641189	0.842748
transcript=PF3D7_0511000.1	>PF3D7_0511000.1-p1 | transcript=PF3D7_0511000.1 | gene=PF3D7_0511000 | organism=Plasmodium_falciparum_3D7 | gene_product=translationally-controlled tumor protein homolog | transcript_product=translationally-controlled tumor protein homolog | location=Pf3D7_05_v3:467585-468100(-) | protein_length=171 | sequence_SO=chromosome | SO=protein_coding | is_pseudo=false	6	6	6	6	6	6	6	6	6	6	6	6	72	3.73834e+06	5.64084e+06	4098503	3.69626e+06	4.77011e+06	3.56334e+06	4328002	4.7184e+06	4.1273e+06	3.81393e+06	3.89729e+06	3.92548e+06		4.29349e+06	4.34496e+06	3.941e+06	1.25794e+07		1.08944	1.1025		0.499703	0.244408
transcript=PF3D7_0511200.1	>PF3D7_0511200.1-p1 | transcript=PF3D7_0511200.1 | gene=PF3D7_0511200 | organism=Plasmodium_falciparum_3D7 | gene_product=stearoyl-CoA desaturase | transcript_product=stearoyl-CoA desaturase | location=Pf3D7_05_v3:471055-474058(+) | protein_length=949 | sequence_SO=chromosome | SO=protein_coding | is_pseudo=false	12	12	12	12	12	12	12	12	12	12	12	12	144	162028	165952	174201	182878	21819.6	170648	179440	178767	196266	61442.5	163365	198337		171265	137669	154853	463786		1.10598	0.889028		0.64687	0.744589
transcript=PF3D7_0511300.1	>PF3D7_0511300.1-p1 | transcript=PF3D7_0511300.1 | gene=PF3D7_0511300 | organism=Plasmodium_falciparum_3D7 | gene_product=MORN repeat protein, putative | transcript_product=MORN repeat protein, putative | location=Pf3D7_05_v3:474487-478882(-) | protein_length=1417 | sequence_SO=chromosome | SO=protein_coding | is_pseudo=false	2	2	2	2	2	2	2	2	2	2	2	2	24	126585	31259.2	203128	139997	24677.2	33330.5	30650.6	13843.6	179988	164425	36538.3	161491		125242	25625.5	135610	286478		0.923546	0.188964		0.838328	0.04432
transcript=PF3D7_0511500.1	>PF3D7_0511500.1-p1 | transcript=PF3D7_0511500.1 | gene=PF3D7_0511500 | organism=Plasmodium_falciparum_3D7 | gene_product=RNA pseudouridylate synthase, putative | transcript_product=RNA pseudouridylate synthase, putative | location=Pf3D7_05_v3:486602-516787(+) | protein_length=10061 | sequence_SO=chromosome | SO=protein_coding | is_pseudo=false	71	71	71	71	71	71	71	71	71	71	71	71	852	95655.8	96943.2	70292.2	69442.9	93950.8	54091.7	78129.4	94611.7	83529.3	73742.4	78273.9	80745.2		83083.5	80195.9	79072.7	242352		1.05072	1.0142		0.643012	0.91474
transcript=PF3D7_0511800.1	>PF3D7_0511800.1-p1 | transcript=PF3D7_0511800.1 | gene=PF3D7_0511800 | organism=Plasmodium_falciparum_3D7 | gene_product=inositol-3-phosphate synthase | transcript_product=inositol-3-phosphate synthase | location=Pf3D7_05_v3:520720-522693(-) | protein_length=604 | sequence_SO=chromosome | SO=protein_coding | is_pseudo=false	63	63	63	63	63	63	63	63	63	63	63	63	756	4197067	4430348	4.72132e+06	4.40504e+06	4355692	3989845	4.62304e+06	4.66992e+06	4.69074e+06	4532923	4657423	4.61215e+06		4438443	4.40962e+06	4.62331e+06	1.34714e+07		0.960015	0.953781		0.185374	0.266178
transcript=PF3D7_0512000.1	>PF3D7_0512000.1-p1 | transcript=PF3D7_0512000.1 | gene=PF3D7_0512000 | organism=Plasmodium_falciparum_3D7 | gene_product=prefoldin subunit 6, putative | transcript_product=prefoldin subunit 6, putative | location=Pf3D7_05_v3:527639-528666(+) | protein_length=119 | sequence_SO=chromosome | SO=protein_coding | is_pseudo=false	18	18	18	18	18	18	18	18	18	18	18	18	216	1.03439e+06	993066	1.02476e+06	1.15492e+06	1.01897e+06	856780	1.04456e+06	1.26078e+06	841261	772333	790274	779471		1.05178e+06	1.04527e+06	795835	2.89289e+06		1.32161	1.31343		0.00246528	0.0549855
transcript=PF3D7_0512200.1	>PF3D7_0512200.1-p1 | transcript=PF3D7_0512200.1 | gene=PF3D7_0512200 | organism=Plasmodium_falciparum_3D7 | gene_product=glutathione synthetase | transcript_product=glutathione synthetase | location=Pf3D7_05_v3:529934-531901(-) | protein_length=655 | sequence_SO=chromosome | SO=protein_coding | is_pseudo=false	17	17	17	17	17	17	17	17	17	17	17	17	204	67427.1	41973.9	84356.2	66151.1	59670.1	60920	64233.7	68999.5	67446.1	76567.2	78142.8	76862.5		64977.1	63455.8	74754.7	203188		0.869205	0.848854		0.349583	0.0133224
transcript=PF3D7_0512300.1	>PF3D7_0512300.1-p1 | transcript=PF3D7_0512300.1 | gene=PF3D7_0512300 | organism=Plasmodium_falciparum_3D7 | gene_product=CDK-activating kinase assembly factor MAT1 | transcript_product=CDK-activating kinase assembly factor MAT1 | location=Pf3D7_05_v3:533556-534338(-) | protein_length=260 | sequence_SO=chromosome | SO=protein_coding | is_pseudo=false	6	6	6	6	6	6	6	6	6	6	6	6	72	37649	88608.9	88467.4	88517.7	106527	52532.5	80074.9	134798	107242	80650	97882.8	109309		75810.8	93483.2	98771	268065		0.76754	0.946464		0.175986	0.793231
transcript=PF3D7_0512600.1	>PF3D7_0512600.1-p1 | transcript=PF3D7_0512600.1 | gene=PF3D7_0512600 | organism=Plasmodium_falciparum_3D7 | gene_product=ras-related protein Rab-1B | transcript_product=ras-related protein Rab-1B | location=Pf3D7_05_v3:544540-545993(+) | protein_length=200 | sequence_SO=chromosome | SO=protein_coding | is_pseudo=false	18	18	18	18	18	18	18	18	18	18	18	18	216	1.55929e+06	1.72173e+06	1.6294e+06	1.55414e+06	1.55312e+06	1.53961e+06	1617921	1.5091e+06	1.60674e+06	1.6567e+06	1.66007e+06	1.64296e+06		1.61614e+06	1554938	1.64162e+06	4.8127e+06		0.984482	0.947199		0.571914	0.0235849
transcript=PF3D7_0512700.1	>PF3D7_0512700.1-p1 | transcript=PF3D7_0512700.1 | gene=PF3D7_0512700 | organism=Plasmodium_falciparum_3D7 | gene_product=orotate phosphoribosyltransferase | transcript_product=orotate phosphoribosyltransferase | location=Pf3D7_05_v3:546734-547579(-) | protein_length=281 | sequence_SO=chromosome | SO=protein_coding | is_pseudo=false	9	9	9	9	9	9	9	9	9	9	9	9	108	113654	133072	63686.5	120054	126099	102791	115917	109418	137979	120239	108552	134601		107617	113556	125343	346516		0.85858	0.905966		0.344707	0.215071
transcript=PF3D7_0513300.1	>PF3D7_0513300.1-p1 | transcript=PF3D7_0513300.1 | gene=PF3D7_0513300 | organism=Plasmodium_falciparum_3D7 | gene_product=purine nucleoside phosphorylase | transcript_product=purine nucleoside phosphorylase | location=Pf3D7_05_v3:569182-569919(-) | protein_length=245 | sequence_SO=chromosome | SO=protein_coding | is_pseudo=false	30	30	30	30	30	30	30	30	30	30	30	30	360	2.23212e+06	1.49539e+06	2.56514e+06	2.50831e+06	1.8826e+06	2716786	2.30872e+06	1600895	2.18278e+06	2.48889e+06	2.64969e+06	2.30697e+06		2.20024e+06	2.12725e+06	2.40708e+06	6.73457e+06		0.914068	0.883745		0.480774	0.350386
transcript=PF3D7_0513600.1	>PF3D7_0513600.1-p1 | transcript=PF3D7_0513600.1 | gene=PF3D7_0513600 | organism=Plasmodium_falciparum_3D7 | gene_product=deoxyribodipyrimidine photo-lyase, putative | transcript_product=deoxyribodipyrimidine photo-lyase, putative | location=Pf3D7_05_v3:574941-578505(-) | protein_length=1113 | sequence_SO=chromosome | SO=protein_coding | is_pseudo=false	51	51	51	51	51	51	51	51	51	51	51	51	612	283766	361202	308849	306527	320526	292519	294158	300689	372041	319144	311309	345381		315086	301973	336969	954028		0.935058	0.896145		0.347108	0.0788924
transcript=PF3D7_0513800.1	>PF3D7_0513800.1-p1 | transcript=PF3D7_0513800.1 | gene=PF3D7_0513800 | organism=Plasmodium_falciparum_3D7 | gene_product=ras-related protein Rab-1A | transcript_product=ras-related protein Rab-1A | location=Pf3D7_05_v3:585357-585980(-) | protein_length=207 | sequence_SO=chromosome | SO=protein_coding | is_pseudo=false	6	6	6	6	6	6	6	6	6	6	6	6	72	450021	433376	495779	561739	416121	375072	487606	417463	453818	427190	483476	369843		485229	424065	433582	1.34288e+06		1.11912	0.978052		0.219226	0.786533
transcript=PF3D7_0515800.1	>PF3D7_0515800.1-p1 | transcript=PF3D7_0515800.1 | gene=PF3D7_0515800 | organism=Plasmodium_falciparum_3D7 | gene_product=BolA-like protein, putative | transcript_product=BolA-like protein, putative | location=Pf3D7_05_v3:658423-658677(-) | protein_length=84 | sequence_SO=chromosome | SO=protein_coding | is_pseudo=false	9	9	9	9	9	9	9	9	9	9	9	9	108	50525	53583	53706.4	45194.7	54152.2	43956.5	57096.9	51062.7	147721	54528.3	47467.9	81564		50752.3	51567.1	82820.3	185140		0.6128	0.622638		0.25519	0.26519
transcript=PF3D7_0516200.1	>PF3D7_0516200.1-p1 | transcript=PF3D7_0516200.1 | gene=PF3D7_0516200 | organism=Plasmodium_falciparum_3D7 | gene_product=40S ribosomal protein S11 | transcript_product=40S ribosomal protein S11 | location=Pf3D7_05_v3:675809-676614(-) | protein_length=151 | sequence_SO=chromosome | SO=protein_coding | is_pseudo=false	25	25	25	25	25	25	25	25	25	25	25	25	300	15303086	17204046	15142464	15293249	19208466	13418138	15495020	16410961	15667615	13373076	14943689	16065699		1.57357e+07	1.61331e+07	1.50125e+07	4.68814e+07		1.04817	1.07465		0.385317	0.446136
transcript=PF3D7_0516400.1	>PF3D7_0516400.1-p1 | transcript=PF3D7_0516400.1 | gene=PF3D7_0516400 | organism=Plasmodium_falciparum_3D7 | gene_product=phosducin-like protein 1, putative | transcript_product=phosducin-like protein 1, putative | location=Pf3D7_05_v3:681430-682437(-) | protein_length=335 | sequence_SO=chromosome | SO=protein_coding | is_pseudo=false	7	7	7	7	7	7	7	7	7	7	7	7	84	98788.7	130808	343082	109867	121176	98943	116640	137910	87562.1	100049	97293.2	98870.8		170636	118667	95943.8	385247		1.7785	1.23684		0.287322	0.059578
transcript=PF3D7_0516800.1	>PF3D7_0516800.1-p1 | transcript=PF3D7_0516800.1 | gene=PF3D7_0516800 | organism=Plasmodium_falciparum_3D7 | gene_product=AP2 domain transcription factor AP2-O2, putative | transcript_product=AP2 domain transcription factor AP2-O2, putative | location=Pf3D7_05_v3:700120-707256(-) | protein_length=2378 | sequence_SO=chromosome | SO=protein_coding | is_pseudo=false	25	25	25	25	25	25	25	25	25	25	25	25	300	64146.6	130791	58330.9	24232.5	28116.5	73643.7	28522.6	33230.2	74335.1	68577.9	67153.7	35626.3		69375.3	40878.2	61423.2	171677		1.12946	0.665517		0.756805	0.196003
transcript=PF3D7_0516900.1	>PF3D7_0516900.1-p1 | transcript=PF3D7_0516900.1 | gene=PF3D7_0516900 | organism=Plasmodium_falciparum_3D7 | gene_product=60S ribosomal protein L2 | transcript_product=60S ribosomal protein L2 | location=Pf3D7_05_v3:712762-713772(-) | protein_length=260 | sequence_SO=chromosome | SO=protein_coding | is_pseudo=false	15	15	15	15	15	15	15	15	15	15	15	15	180	210111	229508	482741	505590	223454	450326	304166	164468	278483	350158	407608	238939		356987	285604	318797	961388		1.11979	0.895879		0.684795	0.666045
transcript=PF3D7_0517000.1	>PF3D7_0517000.1-p1 | transcript=PF3D7_0517000.1 | gene=PF3D7_0517000 | organism=Plasmodium_falciparum_3D7 | gene_product=60S ribosomal protein L12, putative | transcript_product=60S ribosomal protein L12, putative | location=Pf3D7_05_v3:715765-716675(-) | protein_length=165 | sequence_SO=chromosome | SO=protein_coding | is_pseudo=false	19	19	19	19	19	19	19	19	19	19	19	19	228	1421530	1.04627e+06	1.64427e+06	1.59669e+06	1.30394e+06	1.85443e+06	1.54608e+06	569904	1.74905e+06	2.20815e+06	1.84161e+06	1.61253e+06		1.42719e+06	1.31859e+06	1.85284e+06	4.59861e+06		0.770273	0.71166		0.0624199	0.147525
transcript=PF3D7_0517300.1	>PF3D7_0517300.1-p1 | transcript=PF3D7_0517300.1 | gene=PF3D7_0517300 | organism=Plasmodium_falciparum_3D7 | gene_product=serine/arginine-rich splicing factor 1 | transcript_product=serine/arginine-rich splicing factor 1 | location=Pf3D7_05_v3:724681-725751(-) | protein_length=298 | sequence_SO=chromosome | SO=protein_coding | is_pseudo=false	16	16	16	16	16	16	16	16	16	16	16	16	192	3.95798e+06	5201552	4.23762e+06	3.88512e+06	4453184	3638180	4.07003e+06	4.72399e+06	4.7427e+06	3.53751e+06	3532107	4.549e+06		4.32057e+06	4221345	4.09033e+06	1.26322e+07		1.05629	1.03203		0.622098	0.755533
transcript=PF3D7_0517400.1	>PF3D7_0517400.1-p1 | transcript=PF3D7_0517400.1 | gene=PF3D7_0517400 | organism=Plasmodium_falciparum_3D7 | gene_product=FACT complex subunit SPT16, putative | transcript_product=FACT complex subunit SPT16, putative | location=Pf3D7_05_v3:731407-735162(+) | protein_length=1141 | sequence_SO=chromosome | SO=protein_coding | is_pseudo=false	59	59	59	59	59	59	59	59	59	59	59	59	708	1.21472e+06	972280	1.44196e+06	1.27641e+06	1.20718e+06	1.35566e+06	1.54147e+06	1.17126e+06	1071231	1.36224e+06	1.48278e+06	1.34344e+06		1226340	1.31889e+06	1.31492e+06	3.86016e+06		0.932633	1.00302		0.522817	0.974892
transcript=PF3D7_0517700.1	>PF3D7_0517700.1-p1 | transcript=PF3D7_0517700.1 | gene=PF3D7_0517700 | organism=Plasmodium_falciparum_3D7 | gene_product=eukaryotic translation initiation factor 3 subunit B, putative | transcript_product=eukaryotic translation initiation factor 3 subunit B, putative | location=Pf3D7_05_v3:743179-745329(+) | protein_length=716 | sequence_SO=chromosome | SO=protein_coding | is_pseudo=false	35	35	35	35	35	35	35	35	35	35	35	35	420	271303	415444	274052	276230	323794	247274	286501	365015	259243	247656	395154	281926		309257	305646	295995	910898		1.04481	1.03261		0.795574	0.827196
transcript=PF3D7_0518200.1	>PF3D7_0518200.1-p1 | transcript=PF3D7_0518200.1 | gene=PF3D7_0518200 | organism=Plasmodium_falciparum_3D7 | gene_product=SWIB/MDM2 domain-containing protein | transcript_product=SWIB/MDM2 domain-containing protein | location=Pf3D7_05_v3:758503-758898(-) | protein_length=131 | sequence_SO=chromosome | SO=protein_coding | is_pseudo=false	14	14	14	14	14	14	14	14	14	14	14	14	168	45569	52685.8	66145.5	54169.3	64986.6	45280.3	22092.4	49006.1	41286.3	46506.5	52080.9	70801.1		54642.4	45341.3	52668.7	152652		1.03747	0.860878		0.808019	0.530243
transcript=PF3D7_0519400.1	>PF3D7_0519400.1-p1 | transcript=PF3D7_0519400.1 | gene=PF3D7_0519400 | organism=Plasmodium_falciparum_3D7 | gene_product=40S ribosomal protein S24 | transcript_product=40S ribosomal protein S24 | location=Pf3D7_05_v3:798036-798775(-) | protein_length=133 | sequence_SO=chromosome | SO=protein_coding | is_pseudo=false	23	23	23	23	23	23	23	23	23	23	23	23	276	343733	147889	430099	394855	216973	448492	292611	164932	274646	534578	435409	278385		329144	280752	380754	990650		0.864453	0.737357		0.584842	0.302034
transcript=PF3D7_0519500.1	>PF3D7_0519500.1-p1 | transcript=PF3D7_0519500.1 | gene=PF3D7_0519500 | organism=Plasmodium_falciparum_3D7 | gene_product=CCR4 domain-containing protein 1, putative | transcript_product=CCR4 domain-containing protein 1, putative | location=Pf3D7_05_v3:801450-809127(-) | protein_length=2488 | sequence_SO=chromosome | SO=protein_coding | is_pseudo=false	10	10	10	10	10	10	10	10	10	10	10	10	120	231331	328622	187262	195352	272248	228698	244169	253081	314068	232442	219396	235674		235642	249549	250395	735586		0.941081	0.996622		0.719635	0.972829
transcript=PF3D7_0519600.1	>PF3D7_0519600.1-p1 | transcript=PF3D7_0519600.1 | gene=PF3D7_0519600 | organism=Plasmodium_falciparum_3D7 | gene_product=zinc finger protein, putative | transcript_product=zinc finger protein, putative | location=Pf3D7_05_v3:812648-814915(+) | protein_length=755 | sequence_SO=chromosome | SO=protein_coding | is_pseudo=false	10	10	10	10	10	10	10	10	10	10	10	10	120	293852	420380	210198	281102	418648	281692	366684	218631	397332	347929	370616	381296		301383	321414	374293	997090		0.805206	0.858722		0.19396	0.322476
transcript=PF3D7_0519700.1	>PF3D7_0519700.1-p1 | transcript=PF3D7_0519700.1 | gene=PF3D7_0519700 | organism=Plasmodium_falciparum_3D7 | gene_product=FoP domain-containing protein, putative | transcript_product=FoP domain-containing protein, putative | location=Pf3D7_05_v3:817066-819139(+) | protein_length=192 | sequence_SO=chromosome | SO=protein_coding | is_pseudo=false	11	11	11	11	11	11	11	11	11	11	11	11	132	84418.4	302295	270686	230720	326569	203021	280545	294215	255066	221238	174984	214979		222030	276087	216567	714684		1.02523	1.27484		0.920071	0.111711
transcript=PF3D7_0519800.1	>PF3D7_0519800.1-p1 | transcript=PF3D7_0519800.1 | gene=PF3D7_0519800 | organism=Plasmodium_falciparum_3D7 | gene_product=EELM2 domain-containing protein, putative | transcript_product=EELM2 domain-containing protein, putative | location=Pf3D7_05_v3:820719-822908(-) | protein_length=668 | sequence_SO=chromosome | SO=protein_coding | is_pseudo=false	9	9	9	9	9	9	9	9	9	9	9	9	108	11741.8	12782.5	14620.5	23208.8	22455.9	14335.9	26331.3	17806.1	20124.2	15696.4	15715.6	37288.7		15588.4	20232.3	22206.2	58026.9		0.701984	0.91111		0.308467	0.747645
transcript=PF3D7_0520000.1	>PF3D7_0520000.1-p1 | transcript=PF3D7_0520000.1 | gene=PF3D7_0520000 | organism=Plasmodium_falciparum_3D7 | gene_product=40S ribosomal protein S9, putative | transcript_product=40S ribosomal protein S9, putative | location=Pf3D7_05_v3:828953-829883(+) | protein_length=189 | sequence_SO=chromosome | SO=protein_coding | is_pseudo=false	17	17	17	17	17	17	17	17	17	17	17	17	204	998263	742543	1210959	1161662	823012	1.24611e+06	895014	583928	956201	1.25013e+06	1.09364e+06	884287		1.02836e+06	887015	1.04606e+06	2.96144e+06		0.983072	0.847954		0.898627	0.364149
transcript=PF3D7_0520200.1	>PF3D7_0520200.1-p1 | transcript=PF3D7_0520200.1 | gene=PF3D7_0520200 | organism=Plasmodium_falciparum_3D7 | gene_product=mediator of RNA polymerase II transcription subunit 17, putative | transcript_product=mediator of RNA polymerase II transcription subunit 17, putative | location=Pf3D7_05_v3:835314-837407(-) | protein_length=697 | sequence_SO=chromosome | SO=protein_coding | is_pseudo=false	8	8	8	8	8	8	8	8	8	8	8	8	96	57121.6	61897.6	97488.6	99632.2	49537.8	58560.2	53171	85735.6	46913.6	80244.4	48401.2	95052.1		79035	61751.1	67652.8	208439		1.16824	0.912765		0.515012	0.6996
transcript=PF3D7_0520300.1	>PF3D7_0520300.1-p1 | transcript=PF3D7_0520300.1 | gene=PF3D7_0520300 | organism=Plasmodium_falciparum_3D7 | gene_product=U6 snRNA-associated Sm-like protein LSm2, putative | transcript_product=U6 snRNA-associated Sm-like protein LSm2, putative | location=Pf3D7_05_v3:838428-839083(+) | protein_length=103 | sequence_SO=chromosome | SO=protein_coding | is_pseudo=false	1	1	1	1	1	1	1	1	1	1	1	1	12	920979	787116	943091	798980	838589	801113	932797	1.33582e+06	927635	882926	877091	939552		862542	977079	906801	2.74642e+06		0.951192	1.0775		0.366967	0.608651
transcript=PF3D7_0520400.1	>PF3D7_0520400.1-p1 | transcript=PF3D7_0520400.1 | gene=PF3D7_0520400 | organism=Plasmodium_falciparum_3D7 | gene_product=single-stranded DNA-binding protein, putative | transcript_product=single-stranded DNA-binding protein, putative | location=Pf3D7_05_v3:839655-840560(-) | protein_length=301 | sequence_SO=chromosome | SO=protein_coding | is_pseudo=false	7	7	7	7	7	7	7	7	7	7	7	7	84	119247	87842.7	143610	107242	94541.3	70470.6	126424	135525	120044	113454	99888.9	108718		114485	106740	110526	331752		1.03582	0.965747		0.766586	0.821139
transcript=PF3D7_0520600.1	>PF3D7_0520600.1-p1 | transcript=PF3D7_0520600.1 | gene=PF3D7_0520600 | organism=Plasmodium_falciparum_3D7 | gene_product=bis(5'-nucleosyl)-tetraphosphatase [asymmetrical] | transcript_product=bis(5'-nucleosyl)-tetraphosphatase [asymmetrical] | location=Pf3D7_05_v3:843586-844817(-) | protein_length=152 | sequence_SO=chromosome | SO=protein_coding | is_pseudo=false	4	4	4	4	4	4	4	4	4	4	4	4	48	139203	119142	84334.6	102614	128883	118255	104468	133499	132136	132418	126455	134611		111323	121276	131405	364005		0.847178	0.922919		0.184249	0.215298
transcript=PF3D7_0520800.1	>PF3D7_0520800.1-p1 | transcript=PF3D7_0520800.1 | gene=PF3D7_0520800 | organism=Plasmodium_falciparum_3D7 | gene_product=conserved protein, unknown function | transcript_product=conserved protein, unknown function | location=Pf3D7_05_v3:849862-856026(-) | protein_length=2054 | sequence_SO=chromosome | SO=protein_coding | is_pseudo=false	18	18	18	18	18	18	18	18	18	18	18	18	216	87064	99497.1	79164.2	72725.1	86518.8	60135.1	95797.2	113684	71521.8	83918.1	65812.3	78936		84612.6	89033.7	75047.1	248693		1.12746	1.18637		0.227201	0.307341
transcript=PF3D7_0520900.1	>PF3D7_0520900.1-p1 | transcript=PF3D7_0520900.1 | gene=PF3D7_0520900 | organism=Plasmodium_falciparum_3D7 | gene_product=adenosylhomocysteinase | transcript_product=adenosylhomocysteinase | location=Pf3D7_05_v3:857038-858477(+) | protein_length=479 | sequence_SO=chromosome | SO=protein_coding | is_pseudo=false	57	57	57	57	57	57	57	57	57	57	57	57	684	2.50714e+06	2587235	2.76393e+06	2.7516e+06	2.54754e+06	2.67359e+06	2703228	2.20387e+06	2.7738e+06	2.8284e+06	2.61789e+06	2.60006e+06		2.65248e+06	2.53206e+06	2.70504e+06	7.88957e+06		0.980568	0.936053		0.558157	0.241266
transcript=PF3D7_0521700.1	>PF3D7_0521700.1-p1 | transcript=PF3D7_0521700.1 | gene=PF3D7_0521700 | organism=Plasmodium_falciparum_3D7 | gene_product=ATP-dependent RNA helicase DDX1, putative | transcript_product=ATP-dependent RNA helicase DDX1, putative | location=Pf3D7_05_v3:882376-884901(+) | protein_length=841 | sequence_SO=chromosome | SO=protein_coding | is_pseudo=false	14	14	14	14	14	14	14	14	14	14	14	14	168	144707	175952	144665	143425	171476	182808	148163	120536	152214	145831	119381	105961		152187	155746	130847	438780		1.16309	1.19029		0.169638	0.208918
transcript=PF3D7_0522200.1	>PF3D7_0522200.1-p1 | transcript=PF3D7_0522200.1 | gene=PF3D7_0522200 | organism=Plasmodium_falciparum_3D7 | gene_product=transcription initiation factor TFIID subunit 10, putative | transcript_product=transcription initiation factor TFIID subunit 10, putative | location=Pf3D7_05_v3:901414-902173(+) | protein_length=116 | sequence_SO=chromosome | SO=protein_coding | is_pseudo=false	9	9	9	9	9	9	9	9	9	9	9	9	108	27446.5	23473.2	31707.3	34770.1	40179.7	28220.7	23513.8	25177.8	25542.6	23556.7	23224.5	28993		29349.3	29273	25329.2	83951.5		1.15871	1.1557		0.215606	0.382631
transcript=PF3D7_0523000.1	>PF3D7_0523000.1-p1 | transcript=PF3D7_0523000.1 | gene=PF3D7_0523000 | organism=Plasmodium_falciparum_3D7 | gene_product=multidrug resistance protein 1 | transcript_product=multidrug resistance protein 1 | location=Pf3D7_05_v3:957890-962149(+) | protein_length=1419 | sequence_SO=chromosome | SO=protein_coding | is_pseudo=false	78	78	78	78	78	78	78	78	78	78	78	78	936	62020.7	45371.4	60537.9	64745.6	76876.2	48649.7	38585.2	65076.3	69722	57433.6	50527	53954.5		58168.9	57296.8	57909.3	173375		1.00448	0.989425		0.967091	0.951346
transcript=PF3D7_0523400.1	>PF3D7_0523400.1-p1 | transcript=PF3D7_0523400.1 | gene=PF3D7_0523400 | organism=Plasmodium_falciparum_3D7 | gene_product=DnaJ protein, putative | transcript_product=DnaJ protein, putative | location=Pf3D7_05_v3:973518-975876(+) | protein_length=533 | sequence_SO=chromosome | SO=protein_coding | is_pseudo=false	17	17	17	17	17	17	17	17	17	17	17	17	204	17840.4	17174	18675.6	13208.6	13557.8	18312	16839.6	22744.6	2.74522e+06	36747.3	20074.4	2.81164e+06		16724.6	17863.5	1.40342e+06	1.43801e+06		0.0119171	0.0127286		0.179057	0.179316
transcript=PF3D7_0524000.1	>PF3D7_0524000.1-p1 | transcript=PF3D7_0524000.1 | gene=PF3D7_0524000 | organism=Plasmodium_falciparum_3D7 | gene_product=karyopherin beta | transcript_product=karyopherin beta | location=Pf3D7_05_v3:998753-1002124(+) | protein_length=1123 | sequence_SO=chromosome | SO=protein_coding | is_pseudo=false	85	85	85	85	85	85	85	85	85	85	85	85	1020	5861935	6131957	6.46311e+06	5099739	5013409	5.24375e+06	5377393	5.68748e+06	5484080	5202040	5.81911e+06	5.24646e+06		5.88918e+06	5.33051e+06	5.43792e+06	1.66576e+07		1.08298	0.980248		0.229527	0.609615
transcript=PF3D7_0524400.1	>PF3D7_0524400.1-p1 | transcript=PF3D7_0524400.1 | gene=PF3D7_0524400 | organism=Plasmodium_falciparum_3D7 | gene_product=ribosome-interacting GTPase 1, putative | transcript_product=ribosome-interacting GTPase 1, putative | location=Pf3D7_05_v3:1013453-1014550(-) | protein_length=365 | sequence_SO=chromosome | SO=protein_coding | is_pseudo=false	14	14	14	14	14	14	14	14	14	14	14	14	168	78400.9	95469.1	113502	131230	88744.1	104110	94636.1	82455.9	95434.5	108032	95946.2	76302.6		104651	92486.4	93929	291066		1.11415	0.984642		0.453394	0.863702
transcript=PF3D7_0524500.1	>PF3D7_0524500.1-p1 | transcript=PF3D7_0524500.1 | gene=PF3D7_0524500 | organism=Plasmodium_falciparum_3D7 | gene_product=conserved Plasmodium protein, unknown function | transcript_product=conserved Plasmodium protein, unknown function | location=Pf3D7_05_v3:1016198-1016569(+) | protein_length=123 | sequence_SO=chromosome | SO=protein_coding | is_pseudo=false	5	5	5	5	5	5	5	5	5	5	5	5	60	183830	193666	152583	145788	199262	146599	179286	204444	193484	165367	165383	187316		168967	182398	177888	529252		0.949852	1.02535		0.545962	0.776753
transcript=PF3D7_0524600.1	>PF3D7_0524600.1-p1 | transcript=PF3D7_0524600.1 | gene=PF3D7_0524600 | organism=Plasmodium_falciparum_3D7 | gene_product=50S ribosomal protein L12, apicoplast, putative | transcript_product=50S ribosomal protein L12, apicoplast, putative | location=Pf3D7_05_v3:1017809-1018582(+) | protein_length=257 | sequence_SO=chromosome | SO=protein_coding | is_pseudo=false	7	7	7	7	7	7	7	7	7	7	7	7	84	103941	142997	104404	94171.5	108053	65657.3	106411	149335	108333	108205	109799	129004		111379	107364	113835	332578		0.97842	0.943152		0.846334	0.737214
transcript=PF3D7_0524700.1	>PF3D7_0524700.1-p1 | transcript=PF3D7_0524700.1 | gene=PF3D7_0524700 | organism=Plasmodium_falciparum_3D7 | gene_product=mitochondrial import receptor subunit TOM22, putative | transcript_product=mitochondrial import receptor subunit TOM22, putative | location=Pf3D7_05_v3:1019585-1019902(-) | protein_length=105 | sequence_SO=chromosome | SO=protein_coding | is_pseudo=false	5	5	5	5	5	5	5	5	5	5	5	5	60	299419	201698	29902.1	30641.4	13773.7	30495.8	24189.5	32671.8	252834	199077	180065	258282		140415	25282.7	222565	388262		0.630896	0.113597		0.310674	0.00148134
transcript=PF3D7_0524900.1	>PF3D7_0524900.1-p1 | transcript=PF3D7_0524900.1 | gene=PF3D7_0524900 | organism=Plasmodium_falciparum_3D7 | gene_product=S-adenosyl-L-methionine-dependent tRNA 4-demethylwyosine synthase, putative | transcript_product=S-adenosyl-L-methionine-dependent tRNA 4-demethylwyosine synthase, putative | location=Pf3D7_05_v3:1027396-1030362(+) | protein_length=988 | sequence_SO=chromosome | SO=protein_cod…	2	2	2	2	2	2	2	2	2	2	2	2	24	110075	112368	15724.1	133706	185085	15736.2	19556.4	185427	93300.8	79850.8	87207	105837		92968.4	101451	91549	285969		1.0155	1.10816		0.96093	0.851588
transcript=PF3D7_0525100.1	>PF3D7_0525100.1-p1 | transcript=PF3D7_0525100.1 | gene=PF3D7_0525100 | organism=Plasmodium_falciparum_3D7 | gene_product=acyl-CoA synthetase | transcript_product=acyl-CoA synthetase | location=Pf3D7_05_v3:1041745-1043766(+) | protein_length=673 | sequence_SO=chromosome | SO=protein_coding | is_pseudo=false	41	41	41	41	41	41	41	41	41	41	41	41	492	444480	480449	490879	455219	395188	458958	429647	424162	446161	511284	490664	446832		467757	426989	473735	1.36848e+06		0.98738	0.901324		0.77134	0.0684734
transcript=PF3D7_0525800.1	>PF3D7_0525800.1-p1 | transcript=PF3D7_0525800.1 | gene=PF3D7_0525800 | organism=Plasmodium_falciparum_3D7 | gene_product=inner membrane complex protein 1g, putative | transcript_product=inner membrane complex protein 1g, putative | location=Pf3D7_05_v3:1071247-1072149(+) | protein_length=300 | sequence_SO=chromosome | SO=protein_coding | is_pseudo=false	20	20	20	20	20	20	20	20	20	20	20	20	240	185411	233354	201215	241221	283022	196204	226483	234758	195991	195645	197853	302892		215300	235117	223095	673512		0.965059	1.05389		0.8048	0.722752
transcript=PF3D7_0526200.1;transcript=PF3D7_0526200.2	>PF3D7_0526200.1-p1 | transcript=PF3D7_0526200.1 | gene=PF3D7_0526200 | organism=Plasmodium_falciparum_3D7 | gene_product=ADP-ribosylation factor GTPase-activating protein, putative | transcript_product=ADP-ribosylation factor GTPase-activating protein, putative | location=Pf3D7_05_v3:1081558-1083816(-) | protein_length=506 | sequence_SO=chromosome | SO=protein_coding | is_pseudo=false;>PF3D7_052…	12	12	12	12	12	12	12	12	12	12	12	12	144	36262.1	58995.4	37294.2	41764	43246.6	34944.1	14315.9	52015	39973.2	45602.7	49467.1	38818.3		43578.9	36130.4	43465.3	123175		1.00261	0.831247		0.98534	0.439319
transcript=PF3D7_0526500.1	>PF3D7_0526500.1-p1 | transcript=PF3D7_0526500.1 | gene=PF3D7_0526500 | organism=Plasmodium_falciparum_3D7 | gene_product=conserved Plasmodium protein, unknown function | transcript_product=conserved Plasmodium protein, unknown function | location=Pf3D7_05_v3:1090930-1095084(+) | protein_length=1384 | sequence_SO=chromosome | SO=protein_coding | is_pseudo=false	13	13	13	13	13	13	13	13	13	13	13	13	156	92500.1	108060	65570.6	72816.8	126927	59234	83092	58319.9	108068	100332	47861	119763		84736.8	81893.1	94005.9	260636		0.901399	0.871149		0.639337	0.611262
transcript=PF3D7_0527000.1	>PF3D7_0527000.1-p1 | transcript=PF3D7_0527000.1 | gene=PF3D7_0527000 | organism=Plasmodium_falciparum_3D7 | gene_product=DNA replication licensing factor MCM3, putative | transcript_product=DNA replication licensing factor MCM3, putative | location=Pf3D7_05_v3:1125099-1128146(-) | protein_length=962 | sequence_SO=chromosome | SO=protein_coding | is_pseudo=false	64	64	64	64	64	64	64	64	64	64	64	64	768	626271	738214	651156	568583	646098	591905	567472	573365	599316	592958	641032	644576		646056	594710	619471	1.86024e+06		1.04292	0.960029		0.521547	0.315364
transcript=PF3D7_0527100.1	>PF3D7_0527100.1-p1 | transcript=PF3D7_0527100.1 | gene=PF3D7_0527100 | organism=Plasmodium_falciparum_3D7 | gene_product=ubiquitin-conjugating enzyme E2 N, putative | transcript_product=ubiquitin-conjugating enzyme E2 N, putative | location=Pf3D7_05_v3:1129959-1130754(-) | protein_length=152 | sequence_SO=chromosome | SO=protein_coding | is_pseudo=false	13	13	13	13	13	13	13	13	13	13	13	13	156	321071	248112	340316	299106	276035	287603	289820	301919	350668	305808	292823	343843		302151	288844	323286	914281		0.934625	0.893464		0.423238	0.0880209
transcript=PF3D7_0527200.1	>PF3D7_0527200.1-p1 | transcript=PF3D7_0527200.1 | gene=PF3D7_0527200 | organism=Plasmodium_falciparum_3D7 | gene_product=ubiquitin carboxyl-terminal hydrolase 14 | transcript_product=ubiquitin carboxyl-terminal hydrolase 14 | location=Pf3D7_05_v3:1132937-1134854(-) | protein_length=605 | sequence_SO=chromosome | SO=protein_coding | is_pseudo=false	24	24	24	24	24	24	24	24	24	24	24	24	288	294262	335938	282916	323586	269443	253758	303283	258576	314626	271766	281626	294925		309176	271265	290736	871176		1.06342	0.933028		0.28127	0.22979
transcript=PF3D7_0527500.1	>PF3D7_0527500.1-p1 | transcript=PF3D7_0527500.1 | gene=PF3D7_0527500 | organism=Plasmodium_falciparum_3D7 | gene_product=Hsc70-interacting protein | transcript_product=Hsc70-interacting protein | location=Pf3D7_05_v3:1143618-1145359(+) | protein_length=458 | sequence_SO=chromosome | SO=protein_coding | is_pseudo=false	25	25	25	25	25	25	25	25	25	25	25	25	300	4.77619e+06	5341137	4.64493e+06	4228830	5.36847e+06	4.05849e+06	4863405	5.44129e+06	5.00687e+06	4.11435e+06	4.49288e+06	5411787		4.74777e+06	4.93291e+06	4.75647e+06	14437156		0.99817	1.03709		0.98183	0.694224
transcript=PF3D7_0527600.1	>PF3D7_0527600.1-p1 | transcript=PF3D7_0527600.1 | gene=PF3D7_0527600 | organism=Plasmodium_falciparum_3D7 | gene_product=conserved Plasmodium protein, unknown function | transcript_product=conserved Plasmodium protein, unknown function | location=Pf3D7_05_v3:1145857-1148810(-) | protein_length=455 | sequence_SO=chromosome | SO=protein_coding | is_pseudo=false	12	12	12	12	12	12	12	12	12	12	12	12	144	104201	131338	96601.1	112811	133242	20017.3	109631	127883	102311	16513.6	87819.3	107107		111238	97693.3	78437.6	287369		1.41817	1.24549		0.220497	0.589969
transcript=PF3D7_0528000.1	>PF3D7_0528000.1-p1 | transcript=PF3D7_0528000.1 | gene=PF3D7_0528000 | organism=Plasmodium_falciparum_3D7 | gene_product=proteasome maturation factor UMP1, putative | transcript_product=proteasome maturation factor UMP1, putative | location=Pf3D7_05_v3:1156205-1156579(-) | protein_length=124 | sequence_SO=chromosome | SO=protein_coding | is_pseudo=false	5	5	5	5	5	5	5	5	5	5	5	5	60	122552	160577	173327	197166	104141	181182	186625	182312	134613	120480	94057.5	134792		163406	163565	120986	447956		1.35062	1.35194		0.0683424	0.12009
transcript=PF3D7_0528100.1	>PF3D7_0528100.1-p1 | transcript=PF3D7_0528100.1 | gene=PF3D7_0528100 | organism=Plasmodium_falciparum_3D7 | gene_product=AP-1 complex subunit beta, putative | transcript_product=AP-1 complex subunit beta, putative | location=Pf3D7_05_v3:1157840-1161553(-) | protein_length=929 | sequence_SO=chromosome | SO=protein_coding | is_pseudo=false	35	35	35	35	35	35	35	35	35	35	35	35	420	163063	159146	143025	170705	145451	94417.9	196733	129129	151159	88489.9	157925	94445		158985	141433	123005	423423		1.29251	1.14982		0.142157	0.536376
transcript=PF3D7_0528200.1	>PF3D7_0528200.1-p1 | transcript=PF3D7_0528200.1 | gene=PF3D7_0528200 | organism=Plasmodium_falciparum_3D7 | gene_product=eukaryotic translation initiation factor 3 subunit E, putative | transcript_product=eukaryotic translation initiation factor 3 subunit E, putative | location=Pf3D7_05_v3:1163408-1165072(-) | protein_length=517 | sequence_SO=chromosome | SO=protein_coding | is_pseudo=false	20	20	20	20	20	20	20	20	20	20	20	20	240	602163	699311	704998	655523	647298	627165	602965	642845	485837	586130	506302	361089		665499	630068	484839	1.78041e+06		1.37262	1.29954		0.0217602	0.0494725
transcript=PF3D7_0528700.1	>PF3D7_0528700.1-p1 | transcript=PF3D7_0528700.1 | gene=PF3D7_0528700 | organism=Plasmodium_falciparum_3D7 | gene_product=peptidyl-prolyl cis-trans isomerase | transcript_product=peptidyl-prolyl cis-trans isomerase | location=Pf3D7_05_v3:1178276-1178890(-) | protein_length=204 | sequence_SO=chromosome | SO=protein_coding | is_pseudo=false	3	3	3	3	3	3	3	3	3	3	3	3	36	21930.4	20976.8	24899.1	35823.9	39486.4	90371.3	21393.3	54771.1	66897.4	71564.7	67216.2	63862.8		25907.6	51505.5	67385.3	144798		0.384469	0.764344		0.000279399	0.358245
transcript=PF3D7_0528800.1	>PF3D7_0528800.1-p1 | transcript=PF3D7_0528800.1 | gene=PF3D7_0528800 | organism=Plasmodium_falciparum_3D7 | gene_product=nucleolar preribosomal GTPase, putative | transcript_product=nucleolar preribosomal GTPase, putative | location=Pf3D7_05_v3:1180425-1182038(-) | protein_length=537 | sequence_SO=chromosome | SO=protein_coding | is_pseudo=false	5	5	5	5	5	5	5	5	5	5	5	5	60	2.21387e+06	2.61154e+06	2.03604e+06	1.95972e+06	3249129	2.28933e+06	2.86496e+06	2.45465e+06	3.86777e+06	2.49235e+06	2614471	4.12316e+06		2.20529e+06	2.71452e+06	3.27444e+06	8.19425e+06		0.673487	0.829003		0.0790827	0.294895
transcript=PF3D7_0529400.1	>PF3D7_0529400.1-p1 | transcript=PF3D7_0529400.1 | gene=PF3D7_0529400 | organism=Plasmodium_falciparum_3D7 | gene_product=conserved Plasmodium protein, unknown function | transcript_product=conserved Plasmodium protein, unknown function | location=Pf3D7_05_v3:1199165-1205187(+) | protein_length=1582 | sequence_SO=chromosome | SO=protein_coding | is_pseudo=false	72	72	72	72	72	72	72	72	72	72	72	72	864	93903.4	161327	87761.8	90614.6	131033	93347.7	113291	105759	151957	91640.5	37129.6	104282		108402	110858	96252.2	315512		1.12623	1.15174		0.695779	0.59149
transcript=PF3D7_0529800.1	>PF3D7_0529800.1-p1 | transcript=PF3D7_0529800.1 | gene=PF3D7_0529800 | organism=Plasmodium_falciparum_3D7 | gene_product=conserved Plasmodium protein, unknown function | transcript_product=conserved Plasmodium protein, unknown function | location=Pf3D7_05_v3:1213533-1219376(+) | protein_length=1906 | sequence_SO=chromosome | SO=protein_coding | is_pseudo=false	27	27	27	27	27	27	27	27	27	27	27	27	324	72217.4	107690	101075	92396.2	47476.3	68915.8	74775.3	57580.8	86662.2	51920.4	91026.9	75613		93344.6	62187	76305.6	231837		1.2233	0.814973		0.195055	0.23872
transcript=PF3D7_0532100.1	>PF3D7_0532100.1-p1 | transcript=PF3D7_0532100.1 | gene=PF3D7_0532100 | organism=Plasmodium_falciparum_3D7 | gene_product=early transcribed membrane protein 5 | transcript_product=early transcribed membrane protein 5 | location=Pf3D7_05_v3:1301224-1301769(+) | protein_length=181 | sequence_SO=chromosome | SO=protein_coding | is_pseudo=false	9	9	9	9	9	9	9	9	9	9	9	9	108	4.49877e+06	5.58346e+06	4807482	4.55348e+06	6.76275e+06	4943466	4910920	6.35878e+06	5378638	4363454	4.81386e+06	4.89515e+06		4.8608e+06	5.74398e+06	4.86278e+06	1.54676e+07		0.999594	1.18121		0.995357	0.165021
transcript=PF3D7_0532300.1	>PF3D7_0532300.1-p1 | transcript=PF3D7_0532300.1 | gene=PF3D7_0532300 | organism=Plasmodium_falciparum_3D7 | gene_product=Plasmodium exported protein (PHISTb), unknown function | transcript_product=Plasmodium exported protein (PHISTb), unknown function | location=Pf3D7_05_v3:1308278-1309940(+) | protein_length=509 | sequence_SO=chromosome | SO=protein_coding | is_pseudo=false	25	25	25	25	25	25	25	25	25	25	25	25	300	1.76659e+06	2760145	1.90281e+06	1.724e+06	2.24503e+06	1.46786e+06	1.93415e+06	2277957	2.3198e+06	1.6755e+06	1.66653e+06	2.30181e+06		2.03838e+06	1.98125e+06	1.99091e+06	6.01054e+06		1.02385	0.995146		0.882047	0.971933
transcript=PF3D7_0532400.1	>PF3D7_0532400.1-p1 | transcript=PF3D7_0532400.1 | gene=PF3D7_0532400 | organism=Plasmodium_falciparum_3D7 | gene_product=lysine-rich membrane-associated PHISTb protein | transcript_product=lysine-rich membrane-associated PHISTb protein | location=Pf3D7_05_v3:1312471-1314154(+) | protein_length=528 | sequence_SO=chromosome | SO=protein_coding | is_pseudo=false	20	20	20	20	20	20	20	20	20	20	20	20	240	465764	509937	365661	355630	592675	427581	463816	522110	426929	419215	349851	441615		424248	501545	409402	1.3352e+06		1.03626	1.22507		0.74515	0.0797668
transcript=PF3D7_0601900.1	>PF3D7_0601900.1-p1 | transcript=PF3D7_0601900.1 | gene=PF3D7_0601900 | organism=Plasmodium_falciparum_3D7 | gene_product=conserved Plasmodium protein, unknown function | transcript_product=conserved Plasmodium protein, unknown function | location=Pf3D7_06_v3:78190-78784(+) | protein_length=128 | sequence_SO=chromosome | SO=protein_coding | is_pseudo=false	4	4	4	4	4	4	4	4	4	4	4	4	48	41802.1	82033.5	52703.8	54335.9	68035	27032.1	66148.5	58723.4	70433.3	33745.8	58940.5	64793.3		57718.8	54984.8	56978.2	169682		1.013	0.965013		0.951944	0.87869
transcript=PF3D7_0602100.1	>PF3D7_0602100.1-p1 | transcript=PF3D7_0602100.1 | gene=PF3D7_0602100 | organism=Plasmodium_falciparum_3D7 | gene_product=ATP-dependent RNA helicase, putative | transcript_product=ATP-dependent RNA helicase, putative | location=Pf3D7_06_v3:92506-96668(+) | protein_length=1350 | sequence_SO=chromosome | SO=protein_coding | is_pseudo=false	21	21	21	21	21	21	21	21	21	21	21	21	252	83858	105111	92619.2	69491.1	96493.7	77698.5	278783	70431.3	87848	84038.5	78720.7	77545		87769.9	130852	82038.1	300660		1.06987	1.59501		0.510689	0.397914
transcript=PF3D7_0602200.1	>PF3D7_0602200.1-p1 | transcript=PF3D7_0602200.1 | gene=PF3D7_0602200 | organism=Plasmodium_falciparum_3D7 | gene_product=MYND-type zinc finger protein, putative | transcript_product=MYND-type zinc finger protein, putative | location=Pf3D7_06_v3:97890-98951(+) | protein_length=252 | sequence_SO=chromosome | SO=protein_coding | is_pseudo=false	9	9	9	9	9	9	9	9	9	9	9	9	108	201679	192159	154348	169939	186133	158395	182278	184542	97529.3	160792	176566	112735		179531	177837	136906	494273		1.31135	1.29897		0.109815	0.115359
transcript=PF3D7_0602400.1	>PF3D7_0602400.1-p1 | transcript=PF3D7_0602400.1 | gene=PF3D7_0602400 | organism=Plasmodium_falciparum_3D7 | gene_product=elongation factor G | transcript_product=elongation factor G | location=Pf3D7_06_v3:101385-104561(-) | protein_length=937 | sequence_SO=chromosome | SO=protein_coding | is_pseudo=false	8	8	8	8	8	8	8	8	8	8	8	8	96	194209	47120.9	237776	169877	70082.1	139740	188385	161992	103574	210432	202442	159442		162246	140050	168972	471268		0.960192	0.828832		0.893345	0.443472
transcript=PF3D7_0603400.1	>PF3D7_0603400.1-p1 | transcript=PF3D7_0603400.1 | gene=PF3D7_0603400 | organism=Plasmodium_falciparum_3D7 | gene_product=trophozoite exported protein 1 | transcript_product=trophozoite exported protein 1 | location=Pf3D7_06_v3:133150-136461(-) | protein_length=1103 | sequence_SO=chromosome | SO=protein_coding | is_pseudo=false	31	31	31	31	31	31	31	31	31	31	31	31	372	107706	88525.2	94818.7	84311	105285	85502.9	65611.6	93191.6	116299	85836.6	101318	118769		93840.3	87397.7	105556	286794		0.889013	0.827979		0.255086	0.159158
transcript=PF3D7_0604100.1	>PF3D7_0604100.1-p1 | transcript=PF3D7_0604100.1 | gene=PF3D7_0604100 | organism=Plasmodium_falciparum_3D7 | gene_product=AP2 domain transcription factor | transcript_product=AP2 domain transcription factor | location=Pf3D7_06_v3:171301-177240(-) | protein_length=1979 | sequence_SO=chromosome | SO=protein_coding | is_pseudo=false	41	41	41	41	41	41	41	41	41	41	41	41	492	23092.8	36597.4	63143.3	37076.4	27714.2	38562.5	39195.1	41209.2	31492.6	25798.7	33389.4	30220		39977.5	36670.3	30225.2	106873		1.32265	1.21324		0.330615	0.125345
transcript=PF3D7_0604300.1	>PF3D7_0604300.1-p1 | transcript=PF3D7_0604300.1 | gene=PF3D7_0604300 | organism=Plasmodium_falciparum_3D7 | gene_product=conserved Plasmodium protein, unknown function | transcript_product=conserved Plasmodium protein, unknown function | location=Pf3D7_06_v3:182216-184537(+) | protein_length=773 | sequence_SO=chromosome | SO=protein_coding | is_pseudo=false	4	4	4	4	4	4	4	4	4	4	4	4	48	55375.4	44470.1	72762.5	52010.9	56023.9	89590.4	74085.8	134721	25801	17305.5	22699.4	18216.2		56154.7	88605.4	21005.5	165766		2.67333	4.21819		0.00662279	0.0268182
transcript=PF3D7_0604500.1	>PF3D7_0604500.1-p1 | transcript=PF3D7_0604500.1 | gene=PF3D7_0604500 | organism=Plasmodium_falciparum_3D7 | gene_product=conserved Plasmodium protein, unknown function | transcript_product=conserved Plasmodium protein, unknown function | location=Pf3D7_06_v3:189012-198078(+) | protein_length=2874 | sequence_SO=chromosome | SO=protein_coding | is_pseudo=false	121	121	121	121	121	121	121	121	121	121	121	121	1452	1.97109e+06	2.30725e+06	1.81763e+06	1.7796e+06	1.91369e+06	1.46619e+06	1821710	2.09481e+06	1.78417e+06	1.69355e+06	1.5957e+06	2.11361e+06		1.96889e+06	1.8241e+06	1.79676e+06	5.58975e+06		1.0958	1.01522		0.335933	0.880052
transcript=PF3D7_0605100.1	>PF3D7_0605100.1-p1 | transcript=PF3D7_0605100.1 | gene=PF3D7_0605100 | organism=Plasmodium_falciparum_3D7 | gene_product=RNA-binding protein, putative | transcript_product=RNA-binding protein, putative | location=Pf3D7_06_v3:217240-219507(+) | protein_length=755 | sequence_SO=chromosome | SO=protein_coding | is_pseudo=false	28	28	28	28	28	28	28	28	28	28	28	28	336	991490	1.15712e+06	1.28317e+06	1.22998e+06	1.19174e+06	1.35518e+06	1.12045e+06	1.22354e+06	1.40633e+06	1.14081e+06	1.34758e+06	1.28107e+06		1.16544e+06	1.22273e+06	1.29395e+06	3.68211e+06		0.900684	0.944957		0.183525	0.381666
transcript=PF3D7_0606000.1	>PF3D7_0606000.1-p1 | transcript=PF3D7_0606000.1 | gene=PF3D7_0606000 | organism=Plasmodium_falciparum_3D7 | gene_product=conserved Plasmodium protein, unknown function | transcript_product=conserved Plasmodium protein, unknown function | location=Pf3D7_06_v3:250612-253803(-) | protein_length=1063 | sequence_SO=chromosome | SO=protein_coding | is_pseudo=false	39	39	39	39	39	39	39	39	39	39	39	39	468	148696	167863	100494	117350	167026	114894	117006	154908	157116	121679	123090	169503		133601	138459	142847	414906		0.93527	0.969278		0.651241	0.814791
transcript=PF3D7_0606600.1	>PF3D7_0606600.1-p1 | transcript=PF3D7_0606600.1 | gene=PF3D7_0606600 | organism=Plasmodium_falciparum_3D7 | gene_product=conserved Plasmodium protein, unknown function | transcript_product=conserved Plasmodium protein, unknown function | location=Pf3D7_06_v3:270332-277762(-) | protein_length=2414 | sequence_SO=chromosome | SO=protein_coding | is_pseudo=false	41	41	41	41	41	41	41	41	41	41	41	41	492	304560	341213	348917	288914	333825	271383	295958	328204	208470	281237	276592	220370		320901	307343	246667	874911		1.30095	1.24598		0.022052	0.0459139
transcript=PF3D7_0606700.1	>PF3D7_0606700.1-p1 | transcript=PF3D7_0606700.1 | gene=PF3D7_0606700 | organism=Plasmodium_falciparum_3D7 | gene_product=coatomer alpha subunit, putative | transcript_product=coatomer alpha subunit, putative | location=Pf3D7_06_v3:282049-287017(+) | protein_length=1512 | sequence_SO=chromosome | SO=protein_coding | is_pseudo=false	49	49	49	49	49	49	49	49	49	49	49	49	588	362833	346590	278428	327293	326821	305399	304418	405524	317032	272808	300731	298014		328786	335541	297146	961473		1.10648	1.12921		0.190077	0.210308
transcript=PF3D7_0606800.1	>PF3D7_0606800.1-p1 | transcript=PF3D7_0606800.1 | gene=PF3D7_0606800 | organism=Plasmodium_falciparum_3D7 | gene_product=VFT protein | transcript_product=VFT protein | location=Pf3D7_06_v3:288377-289276(-) | protein_length=299 | sequence_SO=chromosome | SO=protein_coding | is_pseudo=false	12	12	12	12	12	12	12	12	12	12	12	12	144	22285.7	28666	29596.4	27455.8	15781.1	26227.5	27240.3	22805.8	23461.5	25209.9	21466	23048.5		27001	23013.6	23296.5	73311.1		1.15902	0.98786		0.104805	0.922336
transcript=PF3D7_0606900.1	>PF3D7_0606900.1-p1 | transcript=PF3D7_0606900.1 | gene=PF3D7_0606900 | organism=Plasmodium_falciparum_3D7 | gene_product=glutaredoxin-like protein | transcript_product=glutaredoxin-like protein | location=Pf3D7_06_v3:290426-291085(-) | protein_length=219 | sequence_SO=chromosome | SO=protein_coding | is_pseudo=false	8	8	8	8	8	8	8	8	8	8	8	8	96	43045.3	62195.5	42684.5	19191.6	68752.5	20848.4	57916.1	24201.5	68173.5	64218.6	67605.3	65696.1		41779.2	42929.6	66423.4	151132		0.628984	0.646303		0.0670548	0.145056
transcript=PF3D7_0607000.1	>PF3D7_0607000.1-p1 | transcript=PF3D7_0607000.1 | gene=PF3D7_0607000 | organism=Plasmodium_falciparum_3D7 | gene_product=translation initiation factor IF-2, putative | transcript_product=translation initiation factor IF-2, putative | location=Pf3D7_06_v3:293864-296797(+) | protein_length=977 | sequence_SO=chromosome | SO=protein_coding | is_pseudo=false	43	43	43	43	43	43	43	43	43	43	43	43	516	441053	549184	427256	414616	517271	433198	390192	527720	411988	383115	380439	385521		458027	467095	390266	1.31539e+06		1.17363	1.19686		0.113128	0.101344
transcript=PF3D7_0607600.1	>PF3D7_0607600.1-p1 | transcript=PF3D7_0607600.1 | gene=PF3D7_0607600 | organism=Plasmodium_falciparum_3D7 | gene_product=spindle assembly abnormal protein 6, putative | transcript_product=spindle assembly abnormal protein 6, putative | location=Pf3D7_06_v3:313856-316882(-) | protein_length=861 | sequence_SO=chromosome | SO=protein_coding | is_pseudo=false	25	25	25	25	25	25	25	25	25	25	25	25	300	157429	35542.7	135002	57266.3	44647	34350.2	128374	21513.1	64691.1	101925	99881.9	131786		96309.9	57221.1	99571	253102		0.967248	0.574676		0.924743	0.191275
transcript=PF3D7_0608500.1	>PF3D7_0608500.1-p1 | transcript=PF3D7_0608500.1 | gene=PF3D7_0608500 | organism=Plasmodium_falciparum_3D7 | gene_product=proteasome subunit alpha type-2, putative | transcript_product=proteasome subunit alpha type-2, putative | location=Pf3D7_06_v3:351780-352775(-) | protein_length=235 | sequence_SO=chromosome | SO=protein_coding | is_pseudo=false	19	19	19	19	19	19	19	19	19	19	19	19	228	2.82631e+06	2.36797e+06	2337220	2.64438e+06	2960769	2.79786e+06	3.23362e+06	2.93959e+06	2.83375e+06	3141839	2.80115e+06	3.1462e+06		2.54397e+06	2.98296e+06	2.98074e+06	8.50767e+06		0.853472	1.00075		0.0284105	0.987021
transcript=PF3D7_0608700.1	>PF3D7_0608700.1-p1 | transcript=PF3D7_0608700.1 | gene=PF3D7_0608700 | organism=Plasmodium_falciparum_3D7 | gene_product=T-complex protein 1 subunit zeta | transcript_product=T-complex protein 1 subunit zeta | location=Pf3D7_06_v3:358391-360203(+) | protein_length=543 | sequence_SO=chromosome | SO=protein_coding | is_pseudo=false	33	33	33	33	33	33	33	33	33	33	33	33	396	579572	352852	633314	572044	349761	624838	454483	489509	488605	553535	492321	455148		534445	479648	497402	1.5115e+06		1.07447	0.964305		0.60385	0.784132
transcript=PF3D7_0608800.1	>PF3D7_0608800.1-p1 | transcript=PF3D7_0608800.1 | gene=PF3D7_0608800 | organism=Plasmodium_falciparum_3D7 | gene_product=ornithine aminotransferase | transcript_product=ornithine aminotransferase | location=Pf3D7_06_v3:362635-363879(+) | protein_length=414 | sequence_SO=chromosome | SO=protein_coding | is_pseudo=false	54	54	54	54	54	54	54	54	54	54	54	54	648	8425445	8.05743e+06	11108906	10117499	7.77576e+06	9878090	8354385	7678832	9314081	8934783	8918884	9689337		9.42732e+06	8.42177e+06	9.21427e+06	2.70634e+07		1.02312	0.913992		0.790373	0.220219
transcript=PF3D7_0609000.1	>PF3D7_0609000.1-p1 | transcript=PF3D7_0609000.1 | gene=PF3D7_0609000 | organism=Plasmodium_falciparum_3D7 | gene_product=nucleoporin NUP637, putative | transcript_product=nucleoporin NUP637, putative | location=Pf3D7_06_v3:370261-388494(+) | protein_length=6077 | sequence_SO=chromosome | SO=protein_coding | is_pseudo=false	54	54	54	54	54	54	54	54	54	54	54	54	648	103208	146775	222628	114875	131189	130753	125875	156170	114555	149822	131792	122200		146871	135997	129592	412460		1.13334	1.04942		0.574388	0.554451
transcript=PF3D7_0610100.1	>PF3D7_0610100.1-p1 | transcript=PF3D7_0610100.1 | gene=PF3D7_0610100 | organism=Plasmodium_falciparum_3D7 | gene_product=pre-mRNA-splicing factor SLU7, putative | transcript_product=pre-mRNA-splicing factor SLU7, putative | location=Pf3D7_06_v3:434807-436465(-) | protein_length=444 | sequence_SO=chromosome | SO=protein_coding | is_pseudo=false	2	2	2	2	2	2	2	2	2	2	2	2	24	158581	205396	166420	137541	198001	153440	146765	210288	234408	185562	208982	187891		166984	177124	204211	548318		0.817705	0.867357		0.0886326	0.219199
transcript=PF3D7_0610200.1	>PF3D7_0610200.1-p1 | transcript=PF3D7_0610200.1 | gene=PF3D7_0610200 | organism=Plasmodium_falciparum_3D7 | gene_product=RNA-binding protein 25, putative | transcript_product=RNA-binding protein 25, putative | location=Pf3D7_06_v3:437663-440545(-) | protein_length=960 | sequence_SO=chromosome | SO=protein_coding | is_pseudo=false	19	19	19	19	19	19	19	19	19	19	19	19	228	115457	177205	103648	113114	137704	107816	88567.7	144854	139271	108829	113037	127552		127356	119736	122172	369263		1.04243	0.980057		0.789885	0.876776
transcript=PF3D7_0610400.1	>PF3D7_0610400.1-p1 | transcript=PF3D7_0610400.1 | gene=PF3D7_0610400 | organism=Plasmodium_falciparum_3D7 | gene_product=histone H3 | transcript_product=histone H3 | location=Pf3D7_06_v3:444747-445157(+) | protein_length=136 | sequence_SO=chromosome | SO=protein_coding | is_pseudo=false	7	7	7	7	7	7	7	7	7	7	7	7	84	1.99117e+06	2.59476e+06	2.06203e+06	1.84645e+06	2.45634e+06	2.2156e+06	2248654	2.20889e+06	2.32613e+06	2.2932e+06	1.99e+06	2.2204e+06		2.1236e+06	2282370	2.20743e+06	6.6134e+06		0.962023	1.03395		0.664456	0.465644
transcript=PF3D7_0610500.1	>PF3D7_0610500.1-p1 | transcript=PF3D7_0610500.1 | gene=PF3D7_0610500 | organism=Plasmodium_falciparum_3D7 | gene_product=peptidyl-tRNA hydrolase PTRHD1, putative | transcript_product=peptidyl-tRNA hydrolase PTRHD1, putative | location=Pf3D7_06_v3:445761-446363(-) | protein_length=123 | sequence_SO=chromosome | SO=protein_coding | is_pseudo=false	8	8	8	8	8	8	8	8	8	8	8	8	96	54174.5	81039	87004.6	80861.6	72974.1	117261	91858.2	106853	72128.4	81790.1	69816.9	85679.4		75769.9	97236.7	77353.7	250360		0.979525	1.25704		0.856348	0.128561
transcript=PF3D7_0610700.1	>PF3D7_0610700.1-p1 | transcript=PF3D7_0610700.1 | gene=PF3D7_0610700 | organism=Plasmodium_falciparum_3D7 | gene_product=conserved Plasmodium protein, unknown function | transcript_product=conserved Plasmodium protein, unknown function | location=Pf3D7_06_v3:452667-453446(+) | protein_length=87 | sequence_SO=chromosome | SO=protein_coding | is_pseudo=false	2	2	2	2	2	2	2	2	2	2	2	2	24	22279.5	28215.7	21220.7	25993.8	51297.8	20239.5	22151.6	27847.4	32191.4	24091.3	31440.3	31746.5		24427.4	30384.1	29867.4	84678.8		0.817863	1.0173		0.0759229	0.948291
transcript=PF3D7_0610800.1	>PF3D7_0610800.1-p1 | transcript=PF3D7_0610800.1 | gene=PF3D7_0610800 | organism=Plasmodium_falciparum_3D7 | gene_product=transketolase | transcript_product=transketolase | location=Pf3D7_06_v3:453671-455689(+) | protein_length=672 | sequence_SO=chromosome | SO=protein_coding | is_pseudo=false	33	33	33	33	33	33	33	33	33	33	33	33	396	343976	232657	331793	380736	318311	396375	370716	235453	299110	388843	395158	360974		322291	330214	361021	1.01353e+06		0.892719	0.914666		0.357736	0.49369
transcript=PF3D7_0610900.1	>PF3D7_0610900.1-p1 | transcript=PF3D7_0610900.1 | gene=PF3D7_0610900 | organism=Plasmodium_falciparum_3D7 | gene_product=transcription elongation factor SPT5, putative | transcript_product=transcription elongation factor SPT5, putative | location=Pf3D7_06_v3:456747-460589(-) | protein_length=1280 | sequence_SO=chromosome | SO=protein_coding | is_pseudo=false	27	27	27	27	27	27	27	27	27	27	27	27	324	313405	329171	245335	221189	346015	287835	369424	312783	336299	299345	303799	340294		277275	329014	319934	926223		0.866662	1.02838		0.205068	0.682663
transcript=PF3D7_0611400.1	>PF3D7_0611400.1-p1 | transcript=PF3D7_0611400.1 | gene=PF3D7_0611400 | organism=Plasmodium_falciparum_3D7 | gene_product=SWIB/MDM2 domain-containing protein | transcript_product=SWIB/MDM2 domain-containing protein | location=Pf3D7_06_v3:471658-474150(-) | protein_length=830 | sequence_SO=chromosome | SO=protein_coding | is_pseudo=false	23	23	23	23	23	23	23	23	23	23	23	23	276	147187	133157	154660	150816	160480	130463	152618	161842	129668	135303	146629	135068		146455	151351	136667	434473		1.07162	1.10744		0.151155	0.137328
transcript=PF3D7_0611800.1	>PF3D7_0611800.1-p1 | transcript=PF3D7_0611800.1 | gene=PF3D7_0611800 | organism=Plasmodium_falciparum_3D7 | gene_product=conserved Plasmodium protein, unknown function | transcript_product=conserved Plasmodium protein, unknown function | location=Pf3D7_06_v3:490858-501140(-) | protein_length=3248 | sequence_SO=chromosome | SO=protein_coding | is_pseudo=false	32	32	32	32	32	32	32	32	32	32	32	32	384	81619.9	104214	85343	76672.7	33196.6	83729.4	93408.3	97873	92937.1	74945.7	85683.3	82076.2		86962.5	77051.8	83910.6	247925		1.03637	0.918261		0.684672	0.682633
transcript=PF3D7_0611900.1	>PF3D7_0611900.1-p1 | transcript=PF3D7_0611900.1 | gene=PF3D7_0611900 | organism=Plasmodium_falciparum_3D7 | gene_product=lsm12, putative | transcript_product=lsm12, putative | location=Pf3D7_06_v3:506380-507198(+) | protein_length=176 | sequence_SO=chromosome | SO=protein_coding | is_pseudo=false	4	4	4	4	4	4	4	4	4	4	4	4	48	229285	300873	228878	243228	221032	206087	252451	246833	164657	208981	234224	257989		250566	231601	216463	698629		1.15755	1.06993		0.243114	0.537332
transcript=PF3D7_0612100.1	>PF3D7_0612100.1-p1 | transcript=PF3D7_0612100.1 | gene=PF3D7_0612100 | organism=Plasmodium_falciparum_3D7 | gene_product=eukaryotic translation initiation factor 3 subunit L, putative | transcript_product=eukaryotic translation initiation factor 3 subunit L, putative | location=Pf3D7_06_v3:509160-511130(-) | protein_length=656 | sequence_SO=chromosome | SO=protein_coding | is_pseudo=false	10	10	10	10	10	10	10	10	10	10	10	10	120	129355	62517.2	161375	152659	82445.4	166499	135070	106580	62756.9	156219	132178	61287.3		126477	122649	103110	352236		1.22661	1.18949		0.505279	0.54431
transcript=PF3D7_0612200.1	>PF3D7_0612200.1-p1 | transcript=PF3D7_0612200.1 | gene=PF3D7_0612200 | organism=Plasmodium_falciparum_3D7 | gene_product=leucine-rich repeat protein | transcript_product=leucine-rich repeat protein | location=Pf3D7_06_v3:512972-519548(-) | protein_length=1864 | sequence_SO=chromosome | SO=protein_coding | is_pseudo=false	39	39	39	39	39	39	39	39	39	39	39	39	468	142108	130502	160879	152539	137738	113161	102405	116496	122073	81597.7	95421.1	118237		146507	117450	104332	368289		1.40424	1.12573		0.0136206	0.323086
transcript=PF3D7_0612700.1	>PF3D7_0612700.1-p1 | transcript=PF3D7_0612700.1 | gene=PF3D7_0612700 | organism=Plasmodium_falciparum_3D7 | gene_product=6-cysteine protein P12 | transcript_product=6-cysteine protein P12 | location=Pf3D7_06_v3:525987-527030(-) | protein_length=347 | sequence_SO=chromosome | SO=protein_coding | is_pseudo=false	16	16	16	16	16	16	16	16	16	16	16	16	192	76632.3	72510.1	78394	83971.9	75999.5	61262.3	59540.9	95255.2	73987.1	72478.4	78289.2	60573.9		77877.1	73014.5	71332.1	222224		1.09175	1.02358		0.202947	0.862043
transcript=PF3D7_0612900.1	>PF3D7_0612900.1-p1 | transcript=PF3D7_0612900.1 | gene=PF3D7_0612900 | organism=Plasmodium_falciparum_3D7 | gene_product=nucleolar GTP-binding protein 1, putative | transcript_product=nucleolar GTP-binding protein 1, putative | location=Pf3D7_06_v3:531126-533186(+) | protein_length=686 | sequence_SO=chromosome | SO=protein_coding | is_pseudo=false	13	13	13	13	13	13	13	13	13	13	13	13	156	382877	598731	341469	410200	476611	376404	399833	484298	460474	391236	360898	427447		433319	434287	410014	1.27762e+06		1.05684	1.0592		0.722103	0.511622
transcript=PF3D7_0613300.1	>PF3D7_0613300.1-p1 | transcript=PF3D7_0613300.1 | gene=PF3D7_0613300 | organism=Plasmodium_falciparum_3D7 | gene_product=rhoptry protein ROP14 | transcript_product=rhoptry protein ROP14 | location=Pf3D7_06_v3:540077-544798(-) | protein_length=1422 | sequence_SO=chromosome | SO=protein_coding | is_pseudo=false	29	29	29	29	29	29	29	29	29	29	29	29	348	19482.1	30887.4	25030.2	27745.1	41410.4	23448.6	21962.9	57635.9	45784.3	26675	39446.3	26300.6		25786.2	36114.5	34551.5	96452.2		0.746311	1.04523		0.173415	0.878743
transcript=PF3D7_0613700.1	>PF3D7_0613700.1-p1 | transcript=PF3D7_0613700.1 | gene=PF3D7_0613700 | organism=Plasmodium_falciparum_3D7 | gene_product=syntaxin-binding protein, putative | transcript_product=syntaxin-binding protein, putative | location=Pf3D7_06_v3:559349-561460(-) | protein_length=703 | sequence_SO=chromosome | SO=protein_coding | is_pseudo=false	8	8	8	8	8	8	8	8	8	8	8	8	96	85183.9	26639.8	102249	93309	101836	65664.4	78797.7	112557	27213.9	64025.4	92014.4	28903.9		76845.6	89713.6	53039.4	219599		1.44884	1.69145		0.342573	0.105568
transcript=PF3D7_0613800.1	>PF3D7_0613800.1-p1 | transcript=PF3D7_0613800.1 | gene=PF3D7_0613800 | organism=Plasmodium_falciparum_3D7 | gene_product=AP2 domain transcription factor, putative | transcript_product=AP2 domain transcription factor, putative | location=Pf3D7_06_v3:566139-578993(+) | protein_length=4109 | sequence_SO=chromosome | SO=protein_coding | is_pseudo=false	92	92	92	92	92	92	92	92	92	92	92	92	1104	238057	314923	233894	236959	277528	203410	244464	259997	260192	227932	243421	260753		255958	246350	248075	750383		1.03178	0.993047		0.728869	0.926484
transcript=PF3D7_0613900.1	>PF3D7_0613900.1-p1 | transcript=PF3D7_0613900.1 | gene=PF3D7_0613900 | organism=Plasmodium_falciparum_3D7 | gene_product=myosin E, putative | transcript_product=myosin E, putative | location=Pf3D7_06_v3:579435-585896(-) | protein_length=2153 | sequence_SO=chromosome | SO=protein_coding | is_pseudo=false	31	31	31	31	31	31	31	31	31	31	31	31	372	33032.2	24963.2	20948.8	19938.5	58753.1	20395	55174.6	26392.5	42207.9	19551.2	25508.7	14235.5		24720.7	40178.8	25375.8	90275.3		0.974182	1.58335		0.92703	0.25507
transcript=PF3D7_0614300.1	>PF3D7_0614300.1-p1 | transcript=PF3D7_0614300.1 | gene=PF3D7_0614300 | organism=Plasmodium_falciparum_3D7 | gene_product=major facilitator superfamily-related transporter, putative | transcript_product=major facilitator superfamily-related transporter, putative | location=Pf3D7_06_v3:597484-600517(-) | protein_length=853 | sequence_SO=chromosome | SO=protein_coding | is_pseudo=false	23	23	23	23	23	23	23	23	23	23	23	23	276	29189.7	47889.7	28317.2	29401	39266.7	22520.5	27561.2	27517.4	32888.6	22982.7	37271.9	40084.2		33699.4	29216.5	33306.9	96222.7		1.01179	0.877191		0.950386	0.458472
transcript=PF3D7_0614400.1	>PF3D7_0614400.1-p1 | transcript=PF3D7_0614400.1 | gene=PF3D7_0614400 | organism=Plasmodium_falciparum_3D7 | gene_product=pre-mRNA-splicing factor CWF7, putative | transcript_product=pre-mRNA-splicing factor CWF7, putative | location=Pf3D7_06_v3:604573-605340(+) | protein_length=255 | sequence_SO=chromosome | SO=protein_coding | is_pseudo=false	11	11	11	11	11	11	11	11	11	11	11	11	132	26246.2	57603	56743.7	38528.6	49662.6	41877.6	39054.4	61645.3	33162.1	39160.4	37785.2	53323.8		44780.4	48060	40857.9	133698		1.096	1.17627		0.673256	0.322406
transcript=PF3D7_0614500.1	>PF3D7_0614500.1-p1 | transcript=PF3D7_0614500.1 | gene=PF3D7_0614500 | organism=Plasmodium_falciparum_3D7 | gene_product=60S ribosomal protein L19 | transcript_product=60S ribosomal protein L19 | location=Pf3D7_06_v3:606142-607259(-) | protein_length=182 | sequence_SO=chromosome | SO=protein_coding | is_pseudo=false	6	6	6	6	6	6	6	6	6	6	6	6	72	3.70212e+06	4.34418e+06	4.06549e+06	3756918	4161854	3989521	3.81043e+06	4.07415e+06	4.0883e+06	3.58056e+06	3.70773e+06	3.92342e+06		3.96717e+06	4.00899e+06	3.825e+06	1.18012e+07		1.03717	1.0481		0.477495	0.229919
transcript=PF3D7_0615000.1	>PF3D7_0615000.1-p1 | transcript=PF3D7_0615000.1 | gene=PF3D7_0615000 | organism=Plasmodium_falciparum_3D7 | gene_product=conserved Plasmodium protein, unknown function | transcript_product=conserved Plasmodium protein, unknown function | location=Pf3D7_06_v3:622272-622712(+) | protein_length=146 | sequence_SO=chromosome | SO=protein_coding | is_pseudo=false	2	2	2	2	2	2	2	2	2	2	2	2	24	100116	62659.6	88840.2	92415.5	105215	74194.8	100513	53183.9	100687	81175	17882.3	89138.4		86007.9	83276.8	72220.7	241505		1.1909	1.15309		0.532459	0.638424
transcript=PF3D7_0615400.1	>PF3D7_0615400.1-p1 | transcript=PF3D7_0615400.1 | gene=PF3D7_0615400 | organism=Plasmodium_falciparum_3D7 | gene_product=ribonuclease, putative | transcript_product=ribonuclease, putative | location=Pf3D7_06_v3:630956-640174(-) | protein_length=2729 | sequence_SO=chromosome | SO=protein_coding | is_pseudo=false	19	19	19	19	19	19	19	19	19	19	19	19	228	215978	254122	265253	214876	282730	230394	222733	265092	219011	189495	229470	195808		237557	250237	208446	696240		1.13966	1.20049		0.124407	0.0560603
transcript=PF3D7_0615600.1	>PF3D7_0615600.1-p1 | transcript=PF3D7_0615600.1 | gene=PF3D7_0615600 | organism=Plasmodium_falciparum_3D7 | gene_product=zinc finger protein, putative | transcript_product=zinc finger protein, putative | location=Pf3D7_06_v3:646637-655596(-) | protein_length=2528 | sequence_SO=chromosome | SO=protein_coding | is_pseudo=false	7	7	7	7	7	7	7	7	7	7	7	7	84	40958.2	56517.8	48763.4	59345.1	56879.9	59921.5	74232.1	82079.6	45174.8	40045.2	39934.4	45564.7		51396.1	68278.3	42679.8	162354		1.20423	1.59978		0.12293	0.019656
transcript=PF3D7_0615700.1	>PF3D7_0615700.1-p1 | transcript=PF3D7_0615700.1 | gene=PF3D7_0615700 | organism=Plasmodium_falciparum_3D7 | gene_product=RNA and export factor binding protein, putative | transcript_product=RNA and export factor binding protein, putative | location=Pf3D7_06_v3:656376-657636(+) | protein_length=156 | sequence_SO=chromosome | SO=protein_coding | is_pseudo=false	3	3	3	3	3	3	3	3	3	3	3	3	36	77264.5	99497	58195.1	79952.5	81233.4	82327.7	106272	66096.3	82322	41696.7	70513.4	79013.8		78727.3	83982.3	68386.5	231096		1.15121	1.22805		0.44063	0.256406
transcript=PF3D7_0615800.1	>PF3D7_0615800.1-p1 | transcript=PF3D7_0615800.1 | gene=PF3D7_0615800 | organism=Plasmodium_falciparum_3D7 | gene_product=conserved oligomeric Golgi complex subunit 4, putative | transcript_product=conserved oligomeric Golgi complex subunit 4, putative | location=Pf3D7_06_v3:657939-661789(-) | protein_length=1185 | sequence_SO=chromosome | SO=protein_coding | is_pseudo=false	5	5	5	5	5	5	5	5	5	5	5	5	60	458264	397262	443050	447637	703977	459177	424307	848412	627285	328174	434522	356152		436553	608968	436533	1.48206e+06		1.00005	1.39501		0.999788	0.213009
transcript=PF3D7_0616200.1	>PF3D7_0616200.1-p1 | transcript=PF3D7_0616200.1 | gene=PF3D7_0616200 | organism=Plasmodium_falciparum_3D7 | gene_product=kinetochore protein NDC80, putative | transcript_product=kinetochore protein NDC80, putative | location=Pf3D7_06_v3:674118-676375(+) | protein_length=591 | sequence_SO=chromosome | SO=protein_coding | is_pseudo=false	38	38	38	38	38	38	38	38	38	38	38	38	456	230585	291898	238127	221757	296135	176605	206152	257792	248614	205201	202015	209537		245592	234171	216342	696105		1.1352	1.08241		0.184125	0.568855
transcript=PF3D7_0616300.1	>PF3D7_0616300.1-p1 | transcript=PF3D7_0616300.1 | gene=PF3D7_0616300 | organism=Plasmodium_falciparum_3D7 | gene_product=conserved Plasmodium protein, unknown function | transcript_product=conserved Plasmodium protein, unknown function | location=Pf3D7_06_v3:676888-677571(-) | protein_length=227 | sequence_SO=chromosome | SO=protein_coding | is_pseudo=false	7	7	7	7	7	7	7	7	7	7	7	7	84	30253.8	28966.9	27931.5	40516.3	33002.3	33354	26783.2	22798.5	23270.8	42071.2	41130.5	39365.8		31917.1	28984.5	36459.6	97361.2		0.875411	0.794976		0.429238	0.206204
transcript=PF3D7_0617100.1	>PF3D7_0617100.1-p1 | transcript=PF3D7_0617100.1 | gene=PF3D7_0617100 | organism=Plasmodium_falciparum_3D7 | gene_product=AP-2 complex subunit alpha, putative | transcript_product=AP-2 complex subunit alpha, putative | location=Pf3D7_06_v3:710059-714576(+) | protein_length=1236 | sequence_SO=chromosome | SO=protein_coding | is_pseudo=false	9	9	9	9	9	9	9	9	9	9	9	9	108	221630	162854	240921	255986	187879	253365	238273	170318	258369	263196	226423	207081		220348	212459	238767	671574		0.922854	0.889815		0.483077	0.318927
transcript=PF3D7_0617200.1	>PF3D7_0617200.1-p1 | transcript=PF3D7_0617200.1 | gene=PF3D7_0617200 | organism=Plasmodium_falciparum_3D7 | gene_product=conserved protein, unknown function | transcript_product=conserved protein, unknown function | location=Pf3D7_06_v3:717050-718917(+) | protein_length=446 | sequence_SO=chromosome | SO=protein_coding | is_pseudo=false	58	58	58	58	58	58	58	58	58	58	58	58	696	7310699	8954583	7662334	7.65338e+06	8789491	7.10086e+06	6734211	9683026	8803960	5.66613e+06	5767684	5966554		7.89525e+06	8.0769e+06	6.55108e+06	2.25232e+07		1.20518	1.23291		0.177985	0.188191
transcript=PF3D7_0617800.1	>PF3D7_0617800.1-p1 | transcript=PF3D7_0617800.1 | gene=PF3D7_0617800 | organism=Plasmodium_falciparum_3D7 | gene_product=histone H2A | transcript_product=histone H2A | location=Pf3D7_06_v3:748416-748814(-) | protein_length=132 | sequence_SO=chromosome | SO=protein_coding | is_pseudo=false	6	6	6	6	6	6	6	6	6	6	6	6	72	558498	16285.1	705511	738126	174672	560929	461298	105894	253532	880863	640975	344275		504605	325698	529911	1.36021e+06		0.952244	0.614628		0.912396	0.303968
transcript=PF3D7_0617900.1	>PF3D7_0617900.1-p1 | transcript=PF3D7_0617900.1 | gene=PF3D7_0617900 | organism=Plasmodium_falciparum_3D7 | gene_product=histone H3 variant | transcript_product=histone H3 variant | location=Pf3D7_06_v3:754395-754805(+) | protein_length=136 | sequence_SO=chromosome | SO=protein_coding | is_pseudo=false	4	4	4	4	4	4	4	4	4	4	4	4	48	55904.6	61198.1	44399.2	46349.9	60930.2	49396.9	51957.5	55130.7	56532.5	60189.3	47702.8	66228.4		51962.9	54353.8	57663.2	163980		0.901145	0.942608		0.344106	0.503797
transcript=PF3D7_0618000.1	>PF3D7_0618000.1-p1 | transcript=PF3D7_0618000.1 | gene=PF3D7_0618000 | organism=Plasmodium_falciparum_3D7 | gene_product=conserved Plasmodium membrane protein, unknown function | transcript_product=conserved Plasmodium membrane protein, unknown function | location=Pf3D7_06_v3:758609-760996(+) | protein_length=795 | sequence_SO=chromosome | SO=protein_coding | is_pseudo=false	45	45	45	45	45	45	45	45	45	45	45	45	540	269844	399825	285384	261147	333262	248943	288594	321652	372315	260345	257481	344946		304050	298113	308772	910934		0.984708	0.965479		0.917402	0.772084
transcript=PF3D7_0618200.1	>PF3D7_0618200.1-p1 | transcript=PF3D7_0618200.1 | gene=PF3D7_0618200 | organism=Plasmodium_falciparum_3D7 | gene_product=conserved protein, unknown function | transcript_product=conserved protein, unknown function | location=Pf3D7_06_v3:764667-765492(-) | protein_length=199 | sequence_SO=chromosome | SO=protein_coding | is_pseudo=false	9	9	9	9	9	9	9	9	9	9	9	9	108	538430	460426	497801	495347	491873	484833	452696	511594	405758	465669	466537	371999		498001	485249	427491	1.41074e+06		1.16494	1.13511		0.0521068	0.0854685
transcript=PF3D7_0618300.1	>PF3D7_0618300.1-p1 | transcript=PF3D7_0618300.1 | gene=PF3D7_0618300 | organism=Plasmodium_falciparum_3D7 | gene_product=60S ribosomal protein L27a, putative | transcript_product=60S ribosomal protein L27a, putative | location=Pf3D7_06_v3:768792-769456(+) | protein_length=148 | sequence_SO=chromosome | SO=protein_coding | is_pseudo=false	11	11	11	11	11	11	11	11	11	11	11	11	132	23706944	34110548	23925994	23067912	31939424	23425958	24043720	28881868	21707130	21368056	21287652	24312760		2.62028e+07	2.70727e+07	2.21689e+07	7.54445e+07		1.18196	1.2212		0.225759	0.0896187
transcript=PF3D7_0618700.1	>PF3D7_0618700.1-p1 | transcript=PF3D7_0618700.1 | gene=PF3D7_0618700 | organism=Plasmodium_falciparum_3D7 | gene_product=trafficking protein particle complex subunit 6A, putative | transcript_product=trafficking protein particle complex subunit 6A, putative | location=Pf3D7_06_v3:778692-779636(+) | protein_length=284 | sequence_SO=chromosome | SO=protein_coding | is_pseudo=false	5	5	5	5	5	5	5	5	5	5	5	5	60	310876	328051	437707	435500	426433	367314	407775	315752	620332	320295	467284	407959		378033	379319	453968	1.21132e+06		0.832732	0.835563		0.342007	0.33397
transcript=PF3D7_0619000.1;transcript=PF3D7_0619000.2	>PF3D7_0619000.1-p1 | transcript=PF3D7_0619000.1 | gene=PF3D7_0619000 | organism=Plasmodium_falciparum_3D7 | gene_product=conserved protein, unknown function | transcript_product=conserved protein, unknown function | location=Pf3D7_06_v3:788707-796025(-) | protein_length=1796 | sequence_SO=chromosome | SO=protein_coding | is_pseudo=false;>PF3D7_0619000.2-p1 | transcript=PF3D7_0619000.2 | gene=PF3…	6	6	6	6	6	6	6	6	6	6	6	6	72	20568.3	31153.8	44914.7	31682.6	34973.1	25049.7	30405	55709.4	45160.7	33156.8	22087.2	16792.1		32079.9	36534.3	29299.2	97913.4		1.09491	1.24694		0.741453	0.46141
transcript=PF3D7_0619400.1	>PF3D7_0619400.1-p1 | transcript=PF3D7_0619400.1 | gene=PF3D7_0619400 | organism=Plasmodium_falciparum_3D7 | gene_product=cell division cycle protein 48 homologue, putative | transcript_product=cell division cycle protein 48 homologue, putative | location=Pf3D7_06_v3:815622-818247(-) | protein_length=828 | sequence_SO=chromosome | SO=protein_coding | is_pseudo=false	98	98	98	98	98	98	98	98	98	98	98	98	1176	6.98576e+06	5577139	7599012	9040427	6753698	6879588	5.87931e+06	5.66879e+06	4.44417e+06	4807826	5.63268e+06	7732364		7.30059e+06	6.29535e+06	5.65426e+06	1.92502e+07		1.29117	1.11338		0.160472	0.466095
transcript=PF3D7_0619500.1	>PF3D7_0619500.1-p1 | transcript=PF3D7_0619500.1 | gene=PF3D7_0619500 | organism=Plasmodium_falciparum_3D7 | gene_product=acyl-CoA synthetase | transcript_product=acyl-CoA synthetase | location=Pf3D7_06_v3:820069-824247(-) | protein_length=1392 | sequence_SO=chromosome | SO=protein_coding | is_pseudo=false	26	26	26	26	26	26	26	26	26	26	26	26	312	123826	100493	162112	174903	95624	130955	119776	108018	113329	205940	142038	142102		140334	113593	150852	404779		0.930271	0.753011		0.700303	0.152768
transcript=PF3D7_0620500.1	>PF3D7_0620500.1-p1 | transcript=PF3D7_0620500.1 | gene=PF3D7_0620500 | organism=Plasmodium_falciparum_3D7 | gene_product=cleavage stimulation factor subunit 1, putative | transcript_product=cleavage stimulation factor subunit 1, putative | location=Pf3D7_06_v3:855160-857112(+) | protein_length=650 | sequence_SO=chromosome | SO=protein_coding | is_pseudo=false	6	6	6	6	6	6	6	6	6	6	6	6	72	50988.1	56818.1	62249.3	64147.8	37700.1	57846.5	64619.7	48710.6	46967.1	41097.2	35755.3	43967.3		58550.8	52219.2	41946.7	152717		1.39584	1.24489		0.00525629	0.178962
transcript=PF3D7_0621200.1	>PF3D7_0621200.1-p1 | transcript=PF3D7_0621200.1 | gene=PF3D7_0621200 | organism=Plasmodium_falciparum_3D7 | gene_product=pyridoxine biosynthesis protein PDX1 | transcript_product=pyridoxine biosynthesis protein PDX1 | location=Pf3D7_06_v3:871297-872202(-) | protein_length=301 | sequence_SO=chromosome | SO=protein_coding | is_pseudo=false	47	47	47	47	47	47	47	47	47	47	47	47	564	3.83185e+06	4.21331e+06	3.94302e+06	3.80178e+06	4266221	3532442	4404422	4.18985e+06	3.77723e+06	3.51894e+06	3.62114e+06	3880527		3.94749e+06	4.09823e+06	3.69946e+06	1.17452e+07		1.06704	1.10779		0.0923248	0.130031
transcript=PF3D7_0621800.1	>PF3D7_0621800.1-p1 | transcript=PF3D7_0621800.1 | gene=PF3D7_0621800 | organism=Plasmodium_falciparum_3D7 | gene_product=nascent polypeptide-associated complex subunit alpha, putative | transcript_product=nascent polypeptide-associated complex subunit alpha, putative | location=Pf3D7_06_v3:891997-892777(+) | protein_length=184 | sequence_SO=chromosome | SO=protein_coding | is_pseudo=false	22	22	22	22	22	22	22	22	22	22	22	22	264	8173922	11207351	6635366	7244078	9645386	6818423	8.01783e+06	8737836	8589511	6.96108e+06	7.09267e+06	7866176		8.31518e+06	8.30487e+06	7.62736e+06	2.42474e+07		1.09018	1.08883		0.561324	0.381009
transcript=PF3D7_0621900.1	>PF3D7_0621900.1-p1 | transcript=PF3D7_0621900.1 | gene=PF3D7_0621900 | organism=Plasmodium_falciparum_3D7 | gene_product=signal recognition particle subunit SRP68, putative | transcript_product=signal recognition particle subunit SRP68, putative | location=Pf3D7_06_v3:893450-895780(-) | protein_length=776 | sequence_SO=chromosome | SO=protein_coding | is_pseudo=false	7	7	7	7	7	7	7	7	7	7	7	7	84	27218	43367.5	28193.9	23654.8	35361.8	23347.9	32131.8	31689.6	21983.3	18079.7	26225.5	32696.5		30608.5	30632.8	24746.3	85987.6		1.2369	1.23788		0.320887	0.197629
transcript=PF3D7_0622200.1	>PF3D7_0622200.1-p1 | transcript=PF3D7_0622200.1 | gene=PF3D7_0622200 | organism=Plasmodium_falciparum_3D7 | gene_product=radical SAM protein, putative | transcript_product=radical SAM protein, putative | location=Pf3D7_06_v3:903740-906322(-) | protein_length=860 | sequence_SO=chromosome | SO=protein_coding | is_pseudo=false	9	9	9	9	9	9	9	9	9	9	9	9	108	22838.5	18100.4	25011.1	15717.6	9241.42	22920.7	11913.7	15891.1	12673.1	12051.2	16589.9	14830.3		20416.9	14991.7	14036.1	49444.8		1.45459	1.06808		0.0498527	0.777899
transcript=PF3D7_0622800.1	>PF3D7_0622800.1-p1 | transcript=PF3D7_0622800.1 | gene=PF3D7_0622800 | organism=Plasmodium_falciparum_3D7 | gene_product=leucine--tRNA ligase, putative | transcript_product=leucine--tRNA ligase, putative | location=Pf3D7_06_v3:919685-924028(+) | protein_length=1447 | sequence_SO=chromosome | SO=protein_coding | is_pseudo=false	40	40	40	40	40	40	40	40	40	40	40	40	480	895113	1118094	907934	821905	1.04864e+06	807420	883336	1.00391e+06	898209	821574	853419	893639		935761	935826	866710	2.7383e+06		1.07967	1.07974		0.363761	0.306175
transcript=PF3D7_0623100.1	>PF3D7_0623100.1-p1 | transcript=PF3D7_0623100.1 | gene=PF3D7_0623100 | organism=Plasmodium_falciparum_3D7 | gene_product=nuclear polyadenylated RNA-binding protein NAB2, putative | transcript_product=nuclear polyadenylated RNA-binding protein NAB2, putative | location=Pf3D7_06_v3:939660-943720(-) | protein_length=786 | sequence_SO=chromosome | SO=protein_coding | is_pseudo=false	8	8	8	8	8	8	8	8	8	8	8	8	96	751960	1.10299e+06	732870	692732	936360	650330	822169	886670	840974	749329	737036	877465		820137	823882	801201	2.44522e+06		1.02363	1.02831		0.861092	0.763981
transcript=PF3D7_0623500.1	>PF3D7_0623500.1-p1 | transcript=PF3D7_0623500.1 | gene=PF3D7_0623500 | organism=Plasmodium_falciparum_3D7 | gene_product=superoxide dismutase [Fe] | transcript_product=superoxide dismutase [Fe] | location=Pf3D7_06_v3:952906-954848(-) | protein_length=266 | sequence_SO=chromosome | SO=protein_coding | is_pseudo=false	11	11	11	11	11	11	11	11	11	11	11	11	132	245557	170430	234597	181113	226475	226511	132834	154672	156000	224470	160504	232840		207924	185123	193454	586501		1.0748	0.956936		0.621091	0.801964
transcript=PF3D7_0623600.1	>PF3D7_0623600.1-p1 | transcript=PF3D7_0623600.1 | gene=PF3D7_0623600 | organism=Plasmodium_falciparum_3D7 | gene_product=transcription or splicing factor-like protein, putative | transcript_product=transcription or splicing factor-like protein, putative | location=Pf3D7_06_v3:956765-958756(+) | protein_length=615 | sequence_SO=chromosome | SO=protein_coding | is_pseudo=false	13	13	13	13	13	13	13	13	13	13	13	13	156	19428.8	28270.1	21827.6	11404.8	15656.2	10725.5	26681.1	17785.6	16224.4	13735.3	11629	16214.6		20232.8	17712.1	14450.8	52395.8		1.40012	1.22568		0.196756	0.410559
transcript=PF3D7_0624000.1	>PF3D7_0624000.1-p1 | transcript=PF3D7_0624000.1 | gene=PF3D7_0624000 | organism=Plasmodium_falciparum_3D7 | gene_product=hexokinase | transcript_product=hexokinase | location=Pf3D7_06_v3:981066-982547(+) | protein_length=493 | sequence_SO=chromosome | SO=protein_coding | is_pseudo=false	44	44	44	44	44	44	44	44	44	44	44	44	528	554539	427702	602759	590371	477844	610529	577108	418102	537994	633620	577903	490080		543843	520896	559899	1.62464e+06		0.971323	0.930338		0.761105	0.499105
transcript=PF3D7_0624200.1	>PF3D7_0624200.1-p1 | transcript=PF3D7_0624200.1 | gene=PF3D7_0624200 | organism=Plasmodium_falciparum_3D7 | gene_product=conserved Plasmodium protein, unknown function | transcript_product=conserved Plasmodium protein, unknown function | location=Pf3D7_06_v3:985047-986870(-) | protein_length=341 | sequence_SO=chromosome | SO=protein_coding | is_pseudo=false	2	2	2	2	2	2	2	2	2	2	2	2	24	18526.2	31338.2	29237.2	25230.8	21225.2	28668	10303.4	35607.4	17558.4	57945.1	49229.3	24434		26083.1	23951	37291.7	87325.8		0.699434	0.642261		0.336522	0.285911
transcript=PF3D7_0624600.1	>PF3D7_0624600.1-p1 | transcript=PF3D7_0624600.1 | gene=PF3D7_0624600 | organism=Plasmodium_falciparum_3D7 | gene_product=SNF2 helicase, putative | transcript_product=SNF2 helicase, putative | location=Pf3D7_06_v3:999524-1007683(+) | protein_length=2719 | sequence_SO=chromosome | SO=protein_coding | is_pseudo=false	109	109	109	109	109	109	109	109	109	109	109	109	1308	2.07066e+06	2.44229e+06	1.91905e+06	1.99612e+06	2.40555e+06	1707477	2.06984e+06	1842458	2.1503e+06	1861807	1.82571e+06	2.37906e+06		2.10703e+06	2.00633e+06	2.05422e+06	6.16758e+06		1.02571	0.976688		0.772494	0.81958
transcript=PF3D7_0625400.1	>PF3D7_0625400.1-p1 | transcript=PF3D7_0625400.1 | gene=PF3D7_0625400 | organism=Plasmodium_falciparum_3D7 | gene_product=conserved Plasmodium protein, unknown function | transcript_product=conserved Plasmodium protein, unknown function | location=Pf3D7_06_v3:1032536-1033774(-) | protein_length=412 | sequence_SO=chromosome | SO=protein_coding | is_pseudo=false	15	15	15	15	15	15	15	15	15	15	15	15	180	39409.4	71003.2	28300.2	26790.8	24668.4	28108.9	34308.2	25530.6	46088.7	23697.3	26939.5	81196.9		41375.9	28154	44480.6	114011		0.930201	0.63295		0.859186	0.305376
transcript=PF3D7_0625600.1	>PF3D7_0625600.1-p1 | transcript=PF3D7_0625600.1 | gene=PF3D7_0625600 | organism=Plasmodium_falciparum_3D7 | gene_product=poly(A) polymerase PAP, putative | transcript_product=poly(A) polymerase PAP, putative | location=Pf3D7_06_v3:1039655-1041550(+) | protein_length=631 | sequence_SO=chromosome | SO=protein_coding | is_pseudo=false	6	6	6	6	6	6	6	6	6	6	6	6	72	29370.4	32508.7	22691.7	20867.2	31257.3	23142.3	24168	14347.4	16485.9	19413.2	34612.9	15184.1		26359.5	23228.7	21424	71012.3		1.23037	1.08424		0.391255	0.761637
transcript=PF3D7_0626000.1	>PF3D7_0626000.1-p1 | transcript=PF3D7_0626000.1 | gene=PF3D7_0626000 | organism=Plasmodium_falciparum_3D7 | gene_product=conserved Plasmodium protein, unknown function | transcript_product=conserved Plasmodium protein, unknown function | location=Pf3D7_06_v3:1048710-1053965(-) | protein_length=1751 | sequence_SO=chromosome | SO=protein_coding | is_pseudo=false	8	8	8	8	8	8	8	8	8	8	8	8	96	661674	769620	707004	690322	846065	680318	654747	703866	742625	643823	665402	682709		707155	721249	683640	2.11204e+06		1.0344	1.05501		0.479174	0.471398
transcript=PF3D7_0626700.1	>PF3D7_0626700.1-p1 | transcript=PF3D7_0626700.1 | gene=PF3D7_0626700 | organism=Plasmodium_falciparum_3D7 | gene_product=ATPase | transcript_product=ATPase | location=Pf3D7_06_v3:1075018-1076136(+) | protein_length=372 | sequence_SO=chromosome | SO=protein_coding | is_pseudo=false	20	20	20	20	20	20	20	20	20	20	20	20	240	921058	1.00599e+06	946232	957853	1.02164e+06	928535	870477	935743	908693	912243	859273	948336		957782	939099	907136	2.80402e+06		1.05583	1.03523		0.0945802	0.417998
transcript=PF3D7_0626800.1	>PF3D7_0626800.1-p1 | transcript=PF3D7_0626800.1 | gene=PF3D7_0626800 | organism=Plasmodium_falciparum_3D7 | gene_product=pyruvate kinase | transcript_product=pyruvate kinase | location=Pf3D7_06_v3:1078995-1081320(+) | protein_length=511 | sequence_SO=chromosome | SO=protein_coding | is_pseudo=false	78	78	78	78	78	78	78	78	78	78	78	78	936	10124388	10777194	10131048	10240378	10736552	10052730	10662429	9661211	10007627	9744302	10324210	10663825		10318252	1.02782e+07	10184991	3.07815e+07		1.01308	1.00915		0.617352	0.7841
transcript=PF3D7_0627300.1	>PF3D7_0627300.1-p1 | transcript=PF3D7_0627300.1 | gene=PF3D7_0627300 | organism=Plasmodium_falciparum_3D7 | gene_product=E3 ubiquitin-protein ligase RNF5, putative | transcript_product=E3 ubiquitin-protein ligase RNF5, putative | location=Pf3D7_06_v3:1097300-1098649(-) | protein_length=449 | sequence_SO=chromosome | SO=protein_coding | is_pseudo=false	13	13	13	13	13	13	13	13	13	13	13	13	156	138042	176005	155125	138042	155563	122304	154774	151627	129552	127597	117489	137409		151804	146067	128012	425883		1.18586	1.14105		0.0712802	0.106483
transcript=PF3D7_0627500.1	>PF3D7_0627500.1-p1 | transcript=PF3D7_0627500.1 | gene=PF3D7_0627500 | organism=Plasmodium_falciparum_3D7 | gene_product=protein DJ-1 | transcript_product=protein DJ-1 | location=Pf3D7_06_v3:1101734-1102852(-) | protein_length=189 | sequence_SO=chromosome | SO=protein_coding | is_pseudo=false	21	21	21	21	21	21	21	21	21	21	21	21	252	1.83332e+06	1.71108e+06	1.89699e+06	1.96813e+06	1577901	1.95429e+06	2.12649e+06	1.69883e+06	1.68441e+06	1.80107e+06	1.98212e+06	1.49744e+06		1.85238e+06	1.83938e+06	1.74126e+06	5.43301e+06		1.06382	1.05635		0.38374	0.563541
transcript=PF3D7_0627700.1	>PF3D7_0627700.1-p1 | transcript=PF3D7_0627700.1 | gene=PF3D7_0627700 | organism=Plasmodium_falciparum_3D7 | gene_product=transportin | transcript_product=transportin | location=Pf3D7_06_v3:1108197-1111640(+) | protein_length=1147 | sequence_SO=chromosome | SO=protein_coding | is_pseudo=false	27	27	27	27	27	27	27	27	27	27	27	27	324	151220	133613	124860	127544	156058	106878	124313	77028	130774	135482	138594	155684		134309	116069	140133	390512		0.958437	0.828277		0.496073	0.245225
transcript=PF3D7_0627800.1	>PF3D7_0627800.1-p1 | transcript=PF3D7_0627800.1 | gene=PF3D7_0627800 | organism=Plasmodium_falciparum_3D7 | gene_product=acetyl-CoA synthetase, putative | transcript_product=acetyl-CoA synthetase, putative | location=Pf3D7_06_v3:1114544-1117537(-) | protein_length=997 | sequence_SO=chromosome | SO=protein_coding | is_pseudo=false	18	18	18	18	18	18	18	18	18	18	18	18	216	82427.9	109681	84268.4	121498	118733	120275	116427	91890.8	101959	101485	83610.6	108393		99468.7	111832	98861.8	310162		1.00614	1.13119		0.958264	0.182619
transcript=PF3D7_0628000.1	>PF3D7_0628000.1-p1 | transcript=PF3D7_0628000.1 | gene=PF3D7_0628000 | organism=Plasmodium_falciparum_3D7 | gene_product=6-pyruvoyltetrahydropterin synthase | transcript_product=6-pyruvoyltetrahydropterin synthase | location=Pf3D7_06_v3:1121690-1122211(+) | protein_length=173 | sequence_SO=chromosome | SO=protein_coding | is_pseudo=false	2	2	2	2	2	2	2	2	2	2	2	2	24	68448.5	57731.6	55272.3	67421.6	68832.6	71283.3	74504.3	86016.3	19935.4	82977.6	66771.7	35106.4		62218.5	75159.1	51197.8	188575		1.21526	1.46802		0.505255	0.194934
transcript=PF3D7_0628100.1	>PF3D7_0628100.1-p1 | transcript=PF3D7_0628100.1 | gene=PF3D7_0628100 | organism=Plasmodium_falciparum_3D7 | gene_product=HECT-domain (ubiquitin-transferase), putative | transcript_product=HECT-domain (ubiquitin-transferase), putative | location=Pf3D7_06_v3:1122801-1153664(-) | protein_length=10287 | sequence_SO=chromosome | SO=protein_coding | is_pseudo=false	28	28	28	28	28	28	28	28	28	28	28	28	336	31114.9	27115.8	26762.9	30748.2	29454.3	26686.5	27654.2	31312.4	26464.2	15947.7	37472.6	38889.7		28935.4	28776.8	29693.5	87405.8		0.974469	0.969127		0.898058	0.876539
transcript=PF3D7_0628200.1	>PF3D7_0628200.1-p1 | transcript=PF3D7_0628200.1 | gene=PF3D7_0628200 | organism=Plasmodium_falciparum_3D7 | gene_product=eukaryotic translation initiation factor 2-alpha kinase | transcript_product=eukaryotic translation initiation factor 2-alpha kinase | location=Pf3D7_06_v3:1159862-1169080(+) | protein_length=3072 | sequence_SO=chromosome | SO=protein_coding | is_pseudo=false	36	36	36	36	36	36	36	36	36	36	36	36	432	95845.6	76786.6	62462.2	80942	43025.7	52915.9	75820	106370	77609.1	71068.2	80090.1	106660		79009.1	69533	83856.7	232399		0.942191	0.829188		0.65842	0.416972
transcript=PF3D7_0629100.1	>PF3D7_0629100.1-p1 | transcript=PF3D7_0629100.1 | gene=PF3D7_0629100 | organism=Plasmodium_falciparum_3D7 | gene_product=nicotinate phosphoribosyltransferase, putative | transcript_product=nicotinate phosphoribosyltransferase, putative | location=Pf3D7_06_v3:1196041-1198038(-) | protein_length=665 | sequence_SO=chromosome | SO=protein_coding | is_pseudo=false	15	15	15	15	15	15	15	15	15	15	15	15	180	39886.5	37581	93091.3	118415	34285.9	44282.2	27033.5	31998.4	89376.3	48061.6	132244	94288.5		72243.6	34400	90992.5	197636		0.793951	0.378053		0.505054	0.0432469
transcript=PF3D7_0629200.1	>PF3D7_0629200.1-p1 | transcript=PF3D7_0629200.1 | gene=PF3D7_0629200 | organism=Plasmodium_falciparum_3D7 | gene_product=DnaJ protein, putative | transcript_product=DnaJ protein, putative | location=Pf3D7_06_v3:1199853-1200995(-) | protein_length=380 | sequence_SO=chromosome | SO=protein_coding | is_pseudo=false	38	38	38	38	38	38	38	38	38	38	38	38	456	573439	666405	689858	616747	817036	611622	588958	601199	574689	518474	543342	639799		636612	654704	569076	1.86039e+06		1.11868	1.15047		0.117178	0.223527
transcript=PF3D7_0629600.1	>PF3D7_0629600.1-p1 | transcript=PF3D7_0629600.1 | gene=PF3D7_0629600 | organism=Plasmodium_falciparum_3D7 | gene_product=RNA-binding protein, putative | transcript_product=RNA-binding protein, putative | location=Pf3D7_06_v3:1218307-1219251(+) | protein_length=259 | sequence_SO=chromosome | SO=protein_coding | is_pseudo=false	2	2	2	2	2	2	2	2	2	2	2	2	24	40602.5	51682.8	34473.9	31561.7	53870.5	35158.4	41941.8	28339	25045.8	40926.7	37386.9	29888.4		39580.2	39827.4	33312	112720		1.18817	1.19559		0.316915	0.361884
transcript=PF3D7_0629700.1	>PF3D7_0629700.1-p1 | transcript=PF3D7_0629700.1 | gene=PF3D7_0629700 | organism=Plasmodium_falciparum_3D7 | gene_product=SET domain protein, putative | transcript_product=SET domain protein, putative | location=Pf3D7_06_v3:1221941-1242922(+) | protein_length=6753 | sequence_SO=chromosome | SO=protein_coding | is_pseudo=false	38	38	38	38	38	38	38	38	38	38	38	38	456	171288	246885	195345	162711	332400	229247	161401	260068	161804	148224	186754	89858.9		194057	245779	146660	586496		1.32318	1.67584		0.140926	0.0622646
transcript=PF3D7_0702300.1	>PF3D7_0702300.1-p1 | transcript=PF3D7_0702300.1 | gene=PF3D7_0702300 | organism=Plasmodium_falciparum_3D7 | gene_product=sporozoite threonine and asparagine-rich protein | transcript_product=sporozoite threonine and asparagine-rich protein | location=Pf3D7_07_v3:96761-98730(+) | protein_length=594 | sequence_SO=chromosome | SO=protein_coding | is_pseudo=false	2	2	2	2	2	2	2	2	2	2	2	2	24	21490.1	67545.4	15503.8	37368.5	33658.1	32004	45535.5	50483.1	49861.2	32033.7	45403.3	19914.1		35477	40420.2	36803.1	112700		0.963967	1.09828		0.92556	0.674863
transcript=PF3D7_0702400.1	>PF3D7_0702400.1-p1 | transcript=PF3D7_0702400.1 | gene=PF3D7_0702400 | organism=Plasmodium_falciparum_3D7 | gene_product=small exported membrane protein 1 | transcript_product=small exported membrane protein 1 | location=Pf3D7_07_v3:101694-102285(+) | protein_length=123 | sequence_SO=chromosome | SO=protein_coding | is_pseudo=false	9	9	9	9	9	9	9	9	9	9	9	9	108	44993.6	50912.6	81254.7	80495.7	78594.1	102981	85249.6	47341.1	117212	122813	103306	99137.2		64414.2	78541.4	110617	253573		0.582317	0.71003		0.00944811	0.0628474
transcript=PF3D7_0702500.1	>PF3D7_0702500.1-p1 | transcript=PF3D7_0702500.1 | gene=PF3D7_0702500 | organism=Plasmodium_falciparum_3D7 | gene_product=Plasmodium exported protein, unknown function | transcript_product=Plasmodium exported protein, unknown function | location=Pf3D7_07_v3:104957-105989(-) | protein_length=253 | sequence_SO=chromosome | SO=protein_coding | is_pseudo=false	15	15	15	15	15	15	15	15	15	15	15	15	180	1014332	1.37711e+06	836650	939357	1.24561e+06	898360	1.03139e+06	1.03072e+06	1.10482e+06	942214	946736	1.03528e+06		1.04186e+06	1.05152e+06	1.00726e+06	3.10064e+06		1.03435	1.04394		0.79502	0.61324
transcript=PF3D7_0702900.1	>PF3D7_0702900.1-p1 | transcript=PF3D7_0702900.1 | gene=PF3D7_0702900 | organism=Plasmodium_falciparum_3D7 | gene_product=centrin, putative | transcript_product=centrin, putative | location=Pf3D7_07_v3:113144-113948(-) | protein_length=107 | sequence_SO=chromosome | SO=protein_coding | is_pseudo=false	4	4	4	4	4	4	4	4	4	4	4	4	48	103820	138179	123222	108941	122812	97047.5	117461	135023	77979.9	80952.4	89114.1	76853.6		118541	118086	81225	317851		1.45941	1.45381		0.0120718	0.0137626
transcript=PF3D7_0703200.1	>PF3D7_0703200.1-p1 | transcript=PF3D7_0703200.1 | gene=PF3D7_0703200 | organism=Plasmodium_falciparum_3D7 | gene_product=conserved Plasmodium protein, unknown function | transcript_product=conserved Plasmodium protein, unknown function | location=Pf3D7_07_v3:122513-127135(-) | protein_length=1540 | sequence_SO=chromosome | SO=protein_coding | is_pseudo=false	12	12	12	12	12	12	12	12	12	12	12	12	144	65496.4	93583.7	61967.2	63887.9	83287	70687	75248.9	79092.7	65281.4	56508.5	61320.6	18545.6		71233.8	77078.9	50414	198727		1.41298	1.52892		0.169548	0.0862303
transcript=PF3D7_0703500.1	>PF3D7_0703500.1-p1 | transcript=PF3D7_0703500.1 | gene=PF3D7_0703500 | organism=Plasmodium_falciparum_3D7 | gene_product=erythrocyte membrane-associated antigen | transcript_product=erythrocyte membrane-associated antigen | location=Pf3D7_07_v3:135606-142505(+) | protein_length=2299 | sequence_SO=chromosome | SO=protein_coding | is_pseudo=false	87	87	87	87	87	87	87	87	87	87	87	87	1044	152754	146841	174767	168168	156295	146840	156166	147811	150218	166116	133705	147248		160633	151778	149321	461732		1.07575	1.01645		0.269993	0.748432
transcript=PF3D7_0703600.1	>PF3D7_0703600.1-p1 | transcript=PF3D7_0703600.1 | gene=PF3D7_0703600 | organism=Plasmodium_falciparum_3D7 | gene_product=conserved protein, unknown function | transcript_product=conserved protein, unknown function | location=Pf3D7_07_v3:144019-145953(+) | protein_length=262 | sequence_SO=chromosome | SO=protein_coding | is_pseudo=false	11	11	11	11	11	11	11	11	11	11	11	11	132	137685	173530	138310	115887	153878	135233	144978	168324	120264	144389	115799	19194.9		141353	150603	99911.5	391868		1.41478	1.50737		0.239194	0.162858
transcript=PF3D7_0703700.1	>PF3D7_0703700.1-p1 | transcript=PF3D7_0703700.1 | gene=PF3D7_0703700 | organism=Plasmodium_falciparum_3D7 | gene_product=conserved protein, unknown function | transcript_product=conserved protein, unknown function | location=Pf3D7_07_v3:146645-147394(-) | protein_length=249 | sequence_SO=chromosome | SO=protein_coding | is_pseudo=false	3	3	3	3	3	3	3	3	3	3	3	3	36	216554	212697	262134	235677	220691	211397	133581	207087	152374	144565	129341	112098		231766	193189	134594	559549		1.72196	1.43534		0.000641596	0.0539664
transcript=PF3D7_0704200.1	>PF3D7_0704200.1-p1 | transcript=PF3D7_0704200.1 | gene=PF3D7_0704200 | organism=Plasmodium_falciparum_3D7 | gene_product=tRNA m5C-methyltransferase, putative | transcript_product=tRNA m5C-methyltransferase, putative | location=Pf3D7_07_v3:191309-194890(-) | protein_length=1193 | sequence_SO=chromosome | SO=protein_coding | is_pseudo=false	16	16	16	16	16	16	16	16	16	16	16	16	192	62139.8	57904.4	88015.4	79232.5	64332.4	46003.1	53886.3	92402.1	115975	60065.3	38713.9	81632		71823	64156	74096.7	210076		0.969315	0.865842		0.90518	0.629362
transcript=PF3D7_0704300.1	>PF3D7_0704300.1-p1 | transcript=PF3D7_0704300.1 | gene=PF3D7_0704300 | organism=Plasmodium_falciparum_3D7 | gene_product=conserved Plasmodium membrane protein, unknown function | transcript_product=conserved Plasmodium membrane protein, unknown function | location=Pf3D7_07_v3:197691-203249(+) | protein_length=1852 | sequence_SO=chromosome | SO=protein_coding | is_pseudo=false	81	81	81	81	81	81	81	81	81	81	81	81	972	394569	638286	328936	319550	459905	392627	468134	535021	448106	405924	484578	375767		420335	463922	428594	1.31285e+06		0.980732	1.08243		0.921564	0.385394
transcript=PF3D7_0704400.1	>PF3D7_0704400.1-p1 | transcript=PF3D7_0704400.1 | gene=PF3D7_0704400 | organism=Plasmodium_falciparum_3D7 | gene_product=phosphoinositide-binding protein, putative | transcript_product=phosphoinositide-binding protein, putative | location=Pf3D7_07_v3:204718-207750(+) | protein_length=1010 | sequence_SO=chromosome | SO=protein_coding | is_pseudo=false	12	12	12	12	12	12	12	12	12	12	12	12	144	56920.7	46914.1	46844.2	50538.6	35013.3	30789.6	44129	46693.2	42476.5	41632.5	42544.1	40501.6		50304.4	39156.3	41788.6	131249		1.20378	0.937008		0.034242	0.534804
transcript=PF3D7_0704600.1	>PF3D7_0704600.1-p1 | transcript=PF3D7_0704600.1 | gene=PF3D7_0704600 | organism=Plasmodium_falciparum_3D7 | gene_product=E3 ubiquitin-protein ligase | transcript_product=E3 ubiquitin-protein ligase | location=Pf3D7_07_v3:216024-229072(-) | protein_length=3893 | sequence_SO=chromosome | SO=protein_coding | is_pseudo=false	27	27	27	27	27	27	27	27	27	27	27	27	324	215026	322822	290838	315136	345485	262163	213475	298158	219169	194491	198835	226058		285956	279820	209638	775414		1.36404	1.33478		0.0477302	0.0827307
transcript=PF3D7_0705400.1	>PF3D7_0705400.1-p1 | transcript=PF3D7_0705400.1 | gene=PF3D7_0705400 | organism=Plasmodium_falciparum_3D7 | gene_product=DNA replication licensing factor MCM7 | transcript_product=DNA replication licensing factor MCM7 | location=Pf3D7_07_v3:264973-267438(-) | protein_length=821 | sequence_SO=chromosome | SO=protein_coding | is_pseudo=false	54	54	54	54	54	54	54	54	54	54	54	54	648	409236	471433	415030	398249	458977	369177	418861	423288	482691	431686	412276	455741		423487	417576	445599	1.28666e+06		0.950378	0.937112		0.360843	0.287561
transcript=PF3D7_0705500.1	>PF3D7_0705500.1-p1 | transcript=PF3D7_0705500.1 | gene=PF3D7_0705500 | organism=Plasmodium_falciparum_3D7 | gene_product=inositol-phosphate phosphatase, putative | transcript_product=inositol-phosphate phosphatase, putative | location=Pf3D7_07_v3:270022-278706(-) | protein_length=2814 | sequence_SO=chromosome | SO=protein_coding | is_pseudo=false	30	30	30	30	30	30	30	30	30	30	30	30	360	70111.5	245480	142854	240609	225167	84098.4	245275	136572	285296	175628	208431	372803		174764	172778	260540	608081		0.670775	0.663155		0.208467	0.18184
transcript=PF3D7_0705700.1	>PF3D7_0705700.1-p1 | transcript=PF3D7_0705700.1 | gene=PF3D7_0705700 | organism=Plasmodium_falciparum_3D7 | gene_product=40S ribosomal protein S29, putative | transcript_product=40S ribosomal protein S29, putative | location=Pf3D7_07_v3:285472-286166(-) | protein_length=54 | sequence_SO=chromosome | SO=protein_coding | is_pseudo=false	5	5	5	5	5	5	5	5	5	5	5	5	60	1.62219e+06	2.00526e+06	1.07253e+06	1.39877e+06	2.05151e+06	1.67547e+06	1.68266e+06	1.00697e+06	1.79903e+06	1.55722e+06	1.54032e+06	1.78888e+06		1.52469e+06	1.60415e+06	1.67136e+06	4.8002e+06		0.912242	0.959788		0.52252	0.784993
transcript=PF3D7_0706000.1	>PF3D7_0706000.1-p1 | transcript=PF3D7_0706000.1 | gene=PF3D7_0706000 | organism=Plasmodium_falciparum_3D7 | gene_product=importin-7, putative | transcript_product=importin-7, putative | location=Pf3D7_07_v3:293400-297089(+) | protein_length=1229 | sequence_SO=chromosome | SO=protein_coding | is_pseudo=false	33	33	33	33	33	33	33	33	33	33	33	33	396	428333	493441	533596	443319	415227	406307	425111	1.26971e+06	501394	434430	447811	498735		474672	629090	470592	1.57435e+06		1.00867	1.3368		0.895373	0.512471
transcript=PF3D7_0706500.1	>PF3D7_0706500.1-p1 | transcript=PF3D7_0706500.1 | gene=PF3D7_0706500 | organism=Plasmodium_falciparum_3D7 | gene_product=conserved Plasmodium protein, unknown function | transcript_product=conserved Plasmodium protein, unknown function | location=Pf3D7_07_v3:309902-315022(-) | protein_length=1706 | sequence_SO=chromosome | SO=protein_coding | is_pseudo=false	54	54	54	54	54	54	54	54	54	54	54	54	648	311501	252934	243188	244562	216748	261422	225152	273237	240472	228087	256920	263231		263046	244140	247177	754363		1.0642	0.987711		0.427234	0.855915
transcript=PF3D7_0707200.1	>PF3D7_0707200.1-p1 | transcript=PF3D7_0707200.1 | gene=PF3D7_0707200 | organism=Plasmodium_falciparum_3D7 | gene_product=conserved Plasmodium protein, unknown function | transcript_product=conserved Plasmodium protein, unknown function | location=Pf3D7_07_v3:329936-336325(-) | protein_length=2129 | sequence_SO=chromosome | SO=protein_coding | is_pseudo=false	13	13	13	13	13	13	13	13	13	13	13	13	156	389880	457256	457309	414188	515299	542150	423310	526411	506692	333726	338816	466011		429658	501792	411311	1.34276e+06		1.04461	1.21998		0.717962	0.140542
transcript=PF3D7_0707300.1	>PF3D7_0707300.1-p1 | transcript=PF3D7_0707300.1 | gene=PF3D7_0707300 | organism=Plasmodium_falciparum_3D7 | gene_product=rhoptry-associated membrane antigen | transcript_product=rhoptry-associated membrane antigen | location=Pf3D7_07_v3:338885-342083(+) | protein_length=861 | sequence_SO=chromosome | SO=protein_coding | is_pseudo=false	20	20	20	20	20	20	20	20	20	20	20	20	240	913304	1.05953e+06	1.11124e+06	776612	1.00523e+06	836850	826783	1.21149e+06	957937	812432	985102	1.14748e+06		965171	970088	975738	2.911e+06		0.989171	0.994209		0.920961	0.961997
transcript=PF3D7_0707600.1	>PF3D7_0707600.1-p1 | transcript=PF3D7_0707600.1 | gene=PF3D7_0707600 | organism=Plasmodium_falciparum_3D7 | gene_product=mediator of RNA polymerase II transcription subunit 10, putative | transcript_product=mediator of RNA polymerase II transcription subunit 10, putative | location=Pf3D7_07_v3:353986-354720(+) | protein_length=244 | sequence_SO=chromosome | SO=protein_coding | is_pseudo=false	3	3	3	3	3	3	3	3	3	3	3	3	36	26203.4	21950.8	46890.1	41775.3	23641.1	54385.6	21523.5	15996.8	47066.9	46001.5	48636.9	16871.4		34204.9	28886.8	39644.2	102736		0.862797	0.728651		0.596065	0.387077
transcript=PF3D7_0708300.1	>PF3D7_0708300.1-p1 | transcript=PF3D7_0708300.1 | gene=PF3D7_0708300 | organism=Plasmodium_falciparum_3D7 | gene_product=EKC/KEOPS complex subunit BUD32 | transcript_product=EKC/KEOPS complex subunit BUD32 | location=Pf3D7_07_v3:378031-379305(+) | protein_length=229 | sequence_SO=chromosome | SO=protein_coding | is_pseudo=false	4	4	4	4	4	4	4	4	4	4	4	4	48	10246.3	26596.7	11893.9	14515.4	21731.8	16111.5	26391.1	12389.9	22616.7	18600.6	13519.1	15527		15813.1	19156.1	17565.8	52535		0.900217	1.09053		0.695069	0.682013
transcript=PF3D7_0708400.1	>PF3D7_0708400.1-p1 | transcript=PF3D7_0708400.1 | gene=PF3D7_0708400 | organism=Plasmodium_falciparum_3D7 | gene_product=heat shock protein 90 | transcript_product=heat shock protein 90 | location=Pf3D7_07_v3:381592-384614(+) | protein_length=745 | sequence_SO=chromosome | SO=protein_coding | is_pseudo=false	93	93	93	93	93	93	93	93	93	93	93	93	1116	20871134	18481678	23673216	23235552	18971196	23042376	20762816	21257338	24331086	20635620	20657554	23325152		21565395	2.10084e+07	22237353	6.48112e+07		0.969782	0.944736		0.67545	0.367394
transcript=PF3D7_0708800.1	>PF3D7_0708800.1-p1 | transcript=PF3D7_0708800.1 | gene=PF3D7_0708800 | organism=Plasmodium_falciparum_3D7 | gene_product=heat shock protein 110 | transcript_product=heat shock protein 110 | location=Pf3D7_07_v3:395711-398332(+) | protein_length=873 | sequence_SO=chromosome | SO=protein_coding | is_pseudo=false	63	63	63	63	63	63	63	63	63	63	63	63	756	3.51588e+06	5270414	3.61576e+06	3.52451e+06	4.30645e+06	3819397	4.04167e+06	3.93192e+06	4.26799e+06	3806871	3557751	4.38988e+06		3.98164e+06	4.02486e+06	4.00562e+06	1.20121e+07		0.994013	1.0048		0.961837	0.934363
transcript=PF3D7_0709300.1	>PF3D7_0709300.1-p1 | transcript=PF3D7_0709300.1 | gene=PF3D7_0709300 | organism=Plasmodium_falciparum_3D7 | gene_product=Cg2 protein | transcript_product=Cg2 protein | location=Pf3D7_07_v3:413560-421749(-) | protein_length=2729 | sequence_SO=chromosome | SO=protein_coding | is_pseudo=false	10	10	10	10	10	10	10	10	10	10	10	10	120	212852	759197	211159	205810	210217	261767	219414	164697	233274	244664	589825	219701		347254	214024	321866	883144		1.07888	0.664946		0.882775	0.317268
transcript=PF3D7_0709400.1	>PF3D7_0709400.1-p1 | transcript=PF3D7_0709400.1 | gene=PF3D7_0709400 | organism=Plasmodium_falciparum_3D7 | gene_product=Cg7 protein | transcript_product=Cg7 protein | location=Pf3D7_07_v3:423236-427234(-) | protein_length=1281 | sequence_SO=chromosome | SO=protein_coding | is_pseudo=false	4	4	4	4	4	4	4	4	4	4	4	4	48	52693.8	74147.3	52459.3	55366.5	65823.5	48985.9	65022.8	65338.5	51580	48267.2	43514.8	52815.5		58666.7	61292.7	49044.4	169004		1.1962	1.24974		0.162187	0.0504991
transcript=PF3D7_0709500.1	>PF3D7_0709500.1-p1 | transcript=PF3D7_0709500.1 | gene=PF3D7_0709500 | organism=Plasmodium_falciparum_3D7 | gene_product=conserved Plasmodium protein, unknown function | transcript_product=conserved Plasmodium protein, unknown function | location=Pf3D7_07_v3:428723-429346(+) | protein_length=135 | sequence_SO=chromosome | SO=protein_coding | is_pseudo=false	6	6	6	6	6	6	6	6	6	6	6	6	72	454774	560561	415905	475259	557025	417318	480438	510105	525276	459765	457956	534758		476625	491222	494439	1.46229e+06		0.963972	0.993494		0.648504	0.93163
transcript=PF3D7_0709700.1	>PF3D7_0709700.1-p1 | transcript=PF3D7_0709700.1 | gene=PF3D7_0709700 | organism=Plasmodium_falciparum_3D7 | gene_product=prodrug activation and resistance esterase | transcript_product=prodrug activation and resistance esterase | location=Pf3D7_07_v3:435089-436195(-) | protein_length=368 | sequence_SO=chromosome | SO=protein_coding | is_pseudo=false	20	20	20	20	20	20	20	20	20	20	20	20	240	68745.1	52845	60720.8	52645.7	50174.9	27425	62215.3	53225.1	17445.9	49256.4	23649.5	14828		58739.2	48260	26294.9	133294		2.23386	1.83534		0.0179121	0.0885132
transcript=PF3D7_0710200.1	>PF3D7_0710200.1-p1 | transcript=PF3D7_0710200.1 | gene=PF3D7_0710200 | organism=Plasmodium_falciparum_3D7 | gene_product=conserved Plasmodium protein, unknown function | transcript_product=conserved Plasmodium protein, unknown function | location=Pf3D7_07_v3:463105-471837(+) | protein_length=2910 | sequence_SO=chromosome | SO=protein_coding | is_pseudo=false	123	123	123	123	123	123	123	123	123	123	123	123	1476	439829	688388	444386	408790	526129	451865	489949	562409	376693	380783	446684	380024		495348	507588	396046	1.39898e+06		1.25073	1.28164		0.224333	0.010545
transcript=PF3D7_0710600.1	>PF3D7_0710600.1-p1 | transcript=PF3D7_0710600.1 | gene=PF3D7_0710600 | organism=Plasmodium_falciparum_3D7 | gene_product=60S ribosomal protein L34 | transcript_product=60S ribosomal protein L34 | location=Pf3D7_07_v3:478468-479138(-) | protein_length=150 | sequence_SO=chromosome | SO=protein_coding | is_pseudo=false	3	3	3	3	3	3	3	3	3	3	3	3	36	819078	720020	851582	837920	749611	919283	758753	696485	935028	949809	887198	836079		807150	781033	902029	2.49021e+06		0.894816	0.865863		0.0534356	0.0820973
transcript=PF3D7_0710700.1	>PF3D7_0710700.1-p1 | transcript=PF3D7_0710700.1 | gene=PF3D7_0710700 | organism=Plasmodium_falciparum_3D7 | gene_product=conserved Plasmodium protein, unknown function | transcript_product=conserved Plasmodium protein, unknown function | location=Pf3D7_07_v3:481369-481974(-) | protein_length=201 | sequence_SO=chromosome | SO=protein_coding | is_pseudo=false	6	6	6	6	6	6	6	6	6	6	6	6	72	31373.6	29304.7	25259.3	44957.1	22240.8	17794.8	19109.6	24766.5	65075.6	65747.7	23560.7	13690.2		32723.7	20977.9	42018.5	95720.2		0.778791	0.499254		0.555235	0.221061
transcript=PF3D7_0711000.1	>PF3D7_0711000.1-p1 | transcript=PF3D7_0711000.1 | gene=PF3D7_0711000 | organism=Plasmodium_falciparum_3D7 | gene_product=AAA family ATPase, CDC48 subfamily | transcript_product=AAA family ATPase, CDC48 subfamily | location=Pf3D7_07_v3:487281-490970(-) | protein_length=1229 | sequence_SO=chromosome | SO=protein_coding | is_pseudo=false	45	45	45	45	45	45	45	45	45	45	45	45	540	197754	400304	184879	245755	290711	192861	203941	190555	168551	286869	211104	201715		257173	219517	217060	693750		1.1848	1.01132		0.505593	0.94568
transcript=PF3D7_0711300.1	>PF3D7_0711300.1-p1 | transcript=PF3D7_0711300.1 | gene=PF3D7_0711300 | organism=Plasmodium_falciparum_3D7 | gene_product=conserved Plasmodium protein, unknown function | transcript_product=conserved Plasmodium protein, unknown function | location=Pf3D7_07_v3:499336-499695(+) | protein_length=119 | sequence_SO=chromosome | SO=protein_coding | is_pseudo=false	3	3	3	3	3	3	3	3	3	3	3	3	36	714710	742038	604246	704810	706659	272637	773079	734362	626136	389326	571374	467250		691451	621684	513521	1.82666e+06		1.34649	1.21063		0.0349253	0.445581
transcript=PF3D7_0711500.1	>PF3D7_0711500.1-p1 | transcript=PF3D7_0711500.1 | gene=PF3D7_0711500 | organism=Plasmodium_falciparum_3D7 | gene_product=regulator of chromosome condensation, putative | transcript_product=regulator of chromosome condensation, putative | location=Pf3D7_07_v3:505245-507311(+) | protein_length=688 | sequence_SO=chromosome | SO=protein_coding | is_pseudo=false	37	37	37	37	37	37	37	37	37	37	37	37	444	840034	746741	879729	864331	796245	836126	914179	747572	861327	847811	782119	830162		832709	823530	830355	2.48659e+06		1.00283	0.991781		0.948278	0.869708
transcript=PF3D7_0714000.1	>PF3D7_0714000.1-p1 | transcript=PF3D7_0714000.1 | gene=PF3D7_0714000 | organism=Plasmodium_falciparum_3D7 | gene_product=histone H2B variant | transcript_product=histone H2B variant | location=Pf3D7_07_v3:643101-643472(-) | protein_length=123 | sequence_SO=chromosome | SO=protein_coding | is_pseudo=false	11	11	11	11	11	11	11	11	11	11	11	11	132	946452	969594	1.26675e+06	1.25956e+06	678906	916413	985750	724552	982134	1.17488e+06	1.15404e+06	857251		1.11059e+06	826405	1.04208e+06	2.97907e+06		1.06575	0.793037		0.576675	0.0869292
transcript=PF3D7_0714200.1	>PF3D7_0714200.1-p1 | transcript=PF3D7_0714200.1 | gene=PF3D7_0714200 | organism=Plasmodium_falciparum_3D7 | gene_product=conserved Plasmodium protein, unknown function | transcript_product=conserved Plasmodium protein, unknown function | location=Pf3D7_07_v3:650834-654919(+) | protein_length=1361 | sequence_SO=chromosome | SO=protein_coding | is_pseudo=false	22	22	22	22	22	22	22	22	22	22	22	22	264	298935	280413	258692	204992	279429	192853	243463	251695	247834	122778	253926	292385		260758	241860	229231	731849		1.13753	1.05509		0.48956	0.772301
transcript=PF3D7_0714500.1	>PF3D7_0714500.1-p1 | transcript=PF3D7_0714500.1 | gene=PF3D7_0714500 | organism=Plasmodium_falciparum_3D7 | gene_product=transcription elongation factor s-II, putative | transcript_product=transcription elongation factor s-II, putative | location=Pf3D7_07_v3:664956-666167(+) | protein_length=403 | sequence_SO=chromosome | SO=protein_coding | is_pseudo=false	16	16	16	16	16	16	16	16	16	16	16	16	192	707507	1.05947e+06	810565	732263	808229	731384	628063	771354	829708	683945	663321	1.16685e+06		827451	734757	835955	2.39816e+06		0.989827	0.878944		0.95424	0.459728
transcript=PF3D7_0715200.1	>PF3D7_0715200.1-p1 | transcript=PF3D7_0715200.1 | gene=PF3D7_0715200 | organism=Plasmodium_falciparum_3D7 | gene_product=conserved Plasmodium protein, unknown function | transcript_product=conserved Plasmodium protein, unknown function | location=Pf3D7_07_v3:676061-682681(-) | protein_length=2206 | sequence_SO=chromosome | SO=protein_coding | is_pseudo=false	39	39	39	39	39	39	39	39	39	39	39	39	468	92094.9	91400.4	68137.4	45974.6	73831.2	64508.9	80381.4	78336.2	86338.9	59538.3	43531.3	91935.1		74401.8	74264.4	70335.9	219002		1.05781	1.05585		0.805885	0.760271
transcript=PF3D7_0715500.1	>PF3D7_0715500.1-p1 | transcript=PF3D7_0715500.1 | gene=PF3D7_0715500 | organism=Plasmodium_falciparum_3D7 | gene_product=ATP synthase subunit epsilon, mitochondrial, putative | transcript_product=ATP synthase subunit epsilon, mitochondrial, putative | location=Pf3D7_07_v3:689543-690057(-) | protein_length=71 | sequence_SO=chromosome | SO=protein_coding | is_pseudo=false	5	5	5	5	5	5	5	5	5	5	5	5	60	85688.2	122180	105466	83681.8	36005.8	78807	14954.8	135907	22828.5	13837	17827.5	21303.2		99254.1	66418.7	18949	184622		5.23795	3.50512		0.0022743	0.17335
transcript=PF3D7_0715900.1	>PF3D7_0715900.1-p1 | transcript=PF3D7_0715900.1 | gene=PF3D7_0715900 | organism=Plasmodium_falciparum_3D7 | gene_product=cation diffusion facilitator family protein, putative | transcript_product=cation diffusion facilitator family protein, putative | location=Pf3D7_07_v3:699239-700909(+) | protein_length=556 | sequence_SO=chromosome | SO=protein_coding | is_pseudo=false	9	9	9	9	9	9	9	9	9	9	9	9	108	1.56548e+06	2.59405e+06	1417070	1.42929e+06	2.01527e+06	1488890	1.95778e+06	2.23501e+06	1.67217e+06	1.5189e+06	1.5837e+06	1.82711e+06		1.75147e+06	1.92424e+06	1.65047e+06	5.32618e+06		1.0612	1.16587		0.748993	0.182786
transcript=PF3D7_0716000.1	>PF3D7_0716000.1-p1 | transcript=PF3D7_0716000.1 | gene=PF3D7_0716000 | organism=Plasmodium_falciparum_3D7 | gene_product=RNA-binding protein, putative | transcript_product=RNA-binding protein, putative | location=Pf3D7_07_v3:703207-706584(+) | protein_length=1125 | sequence_SO=chromosome | SO=protein_coding | is_pseudo=false	7	7	7	7	7	7	7	7	7	7	7	7	84	15290.1	126825	110172	75155.7	109468	17424.2	90379.4	128903	97422.2	27485	114106	70834.7		81860.7	86543.7	77461.9	245866		1.05679	1.11724		0.892345	0.778733
transcript=PF3D7_0716300.1	>PF3D7_0716300.1-p1 | transcript=PF3D7_0716300.1 | gene=PF3D7_0716300 | organism=Plasmodium_falciparum_3D7 | gene_product=conserved protein, unknown function | transcript_product=conserved protein, unknown function | location=Pf3D7_07_v3:717281-718968(+) | protein_length=522 | sequence_SO=chromosome | SO=protein_coding | is_pseudo=false	22	22	22	22	22	22	22	22	22	22	22	22	264	890409	1.16856e+06	813875	832233	1.12801e+06	758735	936771	1.00786e+06	798488	864744	810159	791328		926270	957846	816180	2.7003e+06		1.13488	1.17357		0.275332	0.162941
transcript=PF3D7_0716400.1	>PF3D7_0716400.1-p1 | transcript=PF3D7_0716400.1 | gene=PF3D7_0716400 | organism=Plasmodium_falciparum_3D7 | gene_product=transcription initiation factor IIA subunit 1, putative | transcript_product=transcription initiation factor IIA subunit 1, putative | location=Pf3D7_07_v3:720010-721467(+) | protein_length=174 | sequence_SO=chromosome | SO=protein_coding | is_pseudo=false	5	5	5	5	5	5	5	5	5	5	5	5	60	16881.4	133074	114667	131352	153408	122285	118609	32995.3	29194.5	102548	105689	31284.8		98993.8	106824	67179.2	272997		1.47358	1.59014		0.39999	0.282852
transcript=PF3D7_0716800.1	>PF3D7_0716800.1-p1 | transcript=PF3D7_0716800.1 | gene=PF3D7_0716800 | organism=Plasmodium_falciparum_3D7 | gene_product=eukaryotic translation initiation factor 3 subunit I, putative | transcript_product=eukaryotic translation initiation factor 3 subunit I, putative | location=Pf3D7_07_v3:732070-733496(-) | protein_length=327 | sequence_SO=chromosome | SO=protein_coding | is_pseudo=false	28	28	28	28	28	28	28	28	28	28	28	28	336	796494	815665	833195	796310	822032	716963	817752	842839	769959	735804	725702	704049		810416	799897	733878	2.34419e+06		1.10429	1.08996		0.00507562	0.0974128
transcript=PF3D7_0717500.1	>PF3D7_0717500.1-p1 | transcript=PF3D7_0717500.1 | gene=PF3D7_0717500 | organism=Plasmodium_falciparum_3D7 | gene_product=calcium-dependent protein kinase 4 | transcript_product=calcium-dependent protein kinase 4 | location=Pf3D7_07_v3:755763-757696(+) | protein_length=528 | sequence_SO=chromosome | SO=protein_coding | is_pseudo=false	9	9	9	9	9	9	9	9	9	9	9	9	108	15272.5	107651	53384.7	51548.5	104108	47269.3	67408.8	86491.4	26714.6	56904.6	60351	28021.4		56964.2	76319.3	42997.9	176281		1.32481	1.77496		0.541566	0.0751274
transcript=PF3D7_0717700.1	>PF3D7_0717700.1-p1 | transcript=PF3D7_0717700.1 | gene=PF3D7_0717700 | organism=Plasmodium_falciparum_3D7 | gene_product=serine--tRNA ligase, putative | transcript_product=serine--tRNA ligase, putative | location=Pf3D7_07_v3:764794-766413(-) | protein_length=539 | sequence_SO=chromosome | SO=protein_coding | is_pseudo=false	34	34	34	34	34	34	34	34	34	34	34	34	408	979400	1407414	1.31608e+06	1.29548e+06	1.02102e+06	1.11201e+06	1196328	1.68939e+06	1.48735e+06	1.06276e+06	830201	1.26933e+06		1.24959e+06	1.25469e+06	1.16241e+06	3.66669e+06		1.075	1.07938		0.62659	0.66858
transcript=PF3D7_0718500.1	>PF3D7_0718500.1-p1 | transcript=PF3D7_0718500.1 | gene=PF3D7_0718500 | organism=Plasmodium_falciparum_3D7 | gene_product=prefoldin subunit 3, putative | transcript_product=prefoldin subunit 3, putative | location=Pf3D7_07_v3:824445-825884(+) | protein_length=192 | sequence_SO=chromosome | SO=protein_coding | is_pseudo=false	9	9	9	9	9	9	9	9	9	9	9	9	108	105534	26101.1	88808.6	78114.6	51650.2	97815.8	88890.6	53405	60234.8	85371	79460.5	67275		74639.5	72940.4	73085.3	220665		1.02127	0.998017		0.935921	0.991747
transcript=PF3D7_0719000.1	>PF3D7_0719000.1-p1 | transcript=PF3D7_0719000.1 | gene=PF3D7_0719000 | organism=Plasmodium_falciparum_3D7 | gene_product=conserved protein, unknown function | transcript_product=conserved protein, unknown function | location=Pf3D7_07_v3:838135-838596(+) | protein_length=153 | sequence_SO=chromosome | SO=protein_coding | is_pseudo=false	12	12	12	12	12	12	12	12	12	12	12	12	144	133882	46756.3	163366	179819	193317	151128	175009	213523	37768.1	129987	147686	176713		130956	183244	123038	437238		1.06435	1.48932		0.857277	0.138206
transcript=PF3D7_0719600.1	>PF3D7_0719600.1-p1 | transcript=PF3D7_0719600.1 | gene=PF3D7_0719600 | organism=Plasmodium_falciparum_3D7 | gene_product=60S ribosomal protein L11a, putative | transcript_product=60S ribosomal protein L11a, putative | location=Pf3D7_07_v3:858742-859492(-) | protein_length=173 | sequence_SO=chromosome | SO=protein_coding | is_pseudo=false	9	9	9	9	9	9	9	9	9	9	9	9	108	706721	388264	887918	889402	556594	912563	693043	348398	751393	978676	855660	779371		718076	627649	841275	2.187e+06		0.853557	0.746069		0.390985	0.171693
transcript=PF3D7_0719700.1	>PF3D7_0719700.1-p1 | transcript=PF3D7_0719700.1 | gene=PF3D7_0719700 | organism=Plasmodium_falciparum_3D7 | gene_product=40S ribosomal protein S10, putative | transcript_product=40S ribosomal protein S10, putative | location=Pf3D7_07_v3:861583-862487(+) | protein_length=137 | sequence_SO=chromosome | SO=protein_coding | is_pseudo=false	15	15	15	15	15	15	15	15	15	15	15	15	180	359879	325950	423516	435878	366753	404252	367064	328258	333610	456618	424577	411498		386306	366582	406576	1.15946e+06		0.950145	0.901633		0.602835	0.246211
transcript=PF3D7_0720400.1	>PF3D7_0720400.1-p1 | transcript=PF3D7_0720400.1 | gene=PF3D7_0720400 | organism=Plasmodium_falciparum_3D7 | gene_product=apoptosis-inducing factor, putative | transcript_product=apoptosis-inducing factor, putative | location=Pf3D7_07_v3:882936-884988(+) | protein_length=642 | sequence_SO=chromosome | SO=protein_coding | is_pseudo=false	27	27	27	27	27	27	27	27	27	27	27	27	324	103415	79655.8	61312.2	81270.6	83704.7	69820.7	95270.9	25271.8	50360.2	60326.6	70525	52910.1		81413.5	68517	58530.5	208461		1.39096	1.17062		0.0707438	0.57019
transcript=PF3D7_0720800.1	>PF3D7_0720800.1-p1 | transcript=PF3D7_0720800.1 | gene=PF3D7_0720800 | organism=Plasmodium_falciparum_3D7 | gene_product=Ham1-like protein, putative | transcript_product=Ham1-like protein, putative | location=Pf3D7_07_v3:899751-901137(+) | protein_length=198 | sequence_SO=chromosome | SO=protein_coding | is_pseudo=false	14	14	14	14	14	14	14	14	14	14	14	14	168	97915.6	23085.4	56823.8	63213.4	69368.1	105302	105658	65590.8	85682.5	98692.5	109218	82672.4		60259.5	86479.8	94066.4	240806		0.640607	0.919349		0.111147	0.574689
transcript=PF3D7_0721100.1	>PF3D7_0721100.1-p1 | transcript=PF3D7_0721100.1 | gene=PF3D7_0721100 | organism=Plasmodium_falciparum_3D7 | gene_product=conserved protein, unknown function | transcript_product=conserved protein, unknown function | location=Pf3D7_07_v3:916434-917168(+) | protein_length=244 | sequence_SO=chromosome | SO=protein_coding | is_pseudo=false	24	24	24	24	24	24	24	24	24	24	24	24	288	1.97933e+06	2.71636e+06	1.98743e+06	2.01244e+06	2254564	1.82538e+06	2371786	2.31458e+06	2147631	2051011	1.72033e+06	2.13276e+06		2.17389e+06	2.19158e+06	2.01293e+06	6.3784e+06		1.07996	1.08875		0.473661	0.307405
transcript=PF3D7_0721400.1	>PF3D7_0721400.1-p1 | transcript=PF3D7_0721400.1 | gene=PF3D7_0721400 | organism=Plasmodium_falciparum_3D7 | gene_product=rhoptry protein, putative | transcript_product=rhoptry protein, putative | location=Pf3D7_07_v3:926692-928028(+) | protein_length=214 | sequence_SO=chromosome | SO=protein_coding | is_pseudo=false	13	13	13	13	13	13	13	13	13	13	13	13	156	30551.3	91866.9	98053.2	78709.7	92464	104361	75646.5	80358.1	104125	89417.1	89470.9	102888		74795.3	88207.5	96475.2	259478		0.77528	0.914302		0.253573	0.326926
transcript=PF3D7_0721600.1	>PF3D7_0721600.1-p1 | transcript=PF3D7_0721600.1 | gene=PF3D7_0721600 | organism=Plasmodium_falciparum_3D7 | gene_product=40S ribosomal protein S5, putative | transcript_product=40S ribosomal protein S5, putative | location=Pf3D7_07_v3:931459-932164(-) | protein_length=195 | sequence_SO=chromosome | SO=protein_coding | is_pseudo=false	23	23	23	23	23	23	23	23	23	23	23	23	276	779259	472394	762123	791792	616838	904615	773289	368871	769523	940173	757059	658796		701392	665903	781388	2.14868e+06		0.897623	0.852206		0.440167	0.416934
transcript=PF3D7_0722200.1	>PF3D7_0722200.1-p1 | transcript=PF3D7_0722200.1 | gene=PF3D7_0722200 | organism=Plasmodium_falciparum_3D7 | gene_product=rhoptry-associated leucine zipper-like protein 1 | transcript_product=rhoptry-associated leucine zipper-like protein 1 | location=Pf3D7_07_v3:946363-948612(+) | protein_length=749 | sequence_SO=chromosome | SO=protein_coding | is_pseudo=false	35	35	35	35	35	35	35	35	35	35	35	35	420	31540	55503	79255.8	83866.2	18128.7	66043.8	36126	103807	66155.6	76598.1	90691.5	70998		62541.2	56026.4	76110.8	194678		0.821713	0.736116		0.359635	0.368816
transcript=PF3D7_0722400.1	>PF3D7_0722400.1-p1 | transcript=PF3D7_0722400.1 | gene=PF3D7_0722400 | organism=Plasmodium_falciparum_3D7 | gene_product=Obg-like ATPase 1, putative | transcript_product=Obg-like ATPase 1, putative | location=Pf3D7_07_v3:954784-956343(+) | protein_length=393 | sequence_SO=chromosome | SO=protein_coding | is_pseudo=false	28	28	28	28	28	28	28	28	28	28	28	28	336	291339	244736	297885	321675	250389	304771	292917	284331	282404	317826	272953	244826		288909	283102	279502	851513		1.03365	1.01288		0.684615	0.856816
transcript=PF3D7_0722500.1	>PF3D7_0722500.1-p1 | transcript=PF3D7_0722500.1 | gene=PF3D7_0722500 | organism=Plasmodium_falciparum_3D7 | gene_product=pre-mRNA-splicing factor CWC15, putative | transcript_product=pre-mRNA-splicing factor CWC15, putative | location=Pf3D7_07_v3:956920-958017(-) | protein_length=291 | sequence_SO=chromosome | SO=protein_coding | is_pseudo=false	7	7	7	7	7	7	7	7	7	7	7	7	84	77730.5	84484.4	80824.6	75091.2	83779.6	69022.9	75327.6	165277	85523.6	76146.9	76173.8	25861.3		79532.7	98351.8	65926.4	243811		1.20639	1.49184		0.390589	0.272762
transcript=PF3D7_0723300.1	>PF3D7_0723300.1-p1 | transcript=PF3D7_0723300.1 | gene=PF3D7_0723300 | organism=Plasmodium_falciparum_3D7 | gene_product=conserved protein, unknown function | transcript_product=conserved protein, unknown function | location=Pf3D7_07_v3:975766-978408(+) | protein_length=880 | sequence_SO=chromosome | SO=protein_coding | is_pseudo=false	4	4	4	4	4	4	4	4	4	4	4	4	48	10926.2	23487.2	23579.9	9252.04	15918.2	23120.8	13130.3	26263.9	24730.3	20241.8	18646.5	21208		16811.3	19608.3	21206.6	57626.2		0.79274	0.924631		0.349807	0.655005
transcript=PF3D7_0723400.1	>PF3D7_0723400.1-p1 | transcript=PF3D7_0723400.1 | gene=PF3D7_0723400 | organism=Plasmodium_falciparum_3D7 | gene_product=conserved Plasmodium protein, unknown function | transcript_product=conserved Plasmodium protein, unknown function | location=Pf3D7_07_v3:978920-983188(-) | protein_length=1422 | sequence_SO=chromosome | SO=protein_coding | is_pseudo=false	14	14	14	14	14	14	14	14	14	14	14	14	168	31426.4	35768.5	30883.7	26213.3	32544.8	27949.8	29156.7	32621	32033.8	27690.2	24071.1	32255.2		31073	30568.1	29012.6	90653.7		1.07102	1.05362		0.484071	0.526923
transcript=PF3D7_0723600.1	>PF3D7_0723600.1-p1 | transcript=PF3D7_0723600.1 | gene=PF3D7_0723600 | organism=Plasmodium_falciparum_3D7 | gene_product=proteasome assembly chaperone 4, putative | transcript_product=proteasome assembly chaperone 4, putative | location=Pf3D7_07_v3:986598-987365(+) | protein_length=149 | sequence_SO=chromosome | SO=protein_coding | is_pseudo=false	1	1	1	1	1	1	1	1	1	1	1	1	12	162487	252591	178082	136247	219881	32105.5	194712	201776	197971	195292	206204	229927		182352	162119	207348	551819		0.879447	0.781866		0.399211	0.378855
transcript=PF3D7_0723800.1	>PF3D7_0723800.1-p1 | transcript=PF3D7_0723800.1 | gene=PF3D7_0723800 | organism=Plasmodium_falciparum_3D7 | gene_product=conserved Plasmodium protein, unknown function | transcript_product=conserved Plasmodium protein, unknown function | location=Pf3D7_07_v3:993232-1000233(+) | protein_length=2190 | sequence_SO=chromosome | SO=protein_coding | is_pseudo=false	89	89	89	89	89	89	89	89	89	89	89	89	1068	184252	282190	176664	217958	170899	190518	156239	223743	149366	153756	171899	222866		215266	185350	174472	575088		1.23382	1.06235		0.219554	0.643271
transcript=PF3D7_0723900.1	>PF3D7_0723900.1-p1 | transcript=PF3D7_0723900.1 | gene=PF3D7_0723900 | organism=Plasmodium_falciparum_3D7 | gene_product=RNA-binding protein, putative | transcript_product=RNA-binding protein, putative | location=Pf3D7_07_v3:1000701-1004746(-) | protein_length=1222 | sequence_SO=chromosome | SO=protein_coding | is_pseudo=false	9	9	9	9	9	9	9	9	9	9	9	9	108	1.74221e+06	193584	116345	1.61035e+06	35742.4	153568	1.43982e+06	1.66811e+06	1136293	1.20127e+06	135650	1.20636e+06		915621	824308	919895	2.65982e+06		0.995354	0.89609		0.993674	0.855578
transcript=PF3D7_0724100.1	>PF3D7_0724100.1-p1 | transcript=PF3D7_0724100.1 | gene=PF3D7_0724100 | organism=Plasmodium_falciparum_3D7 | gene_product=conserved Plasmodium protein, unknown function | transcript_product=conserved Plasmodium protein, unknown function | location=Pf3D7_07_v3:1013295-1016449(-) | protein_length=1003 | sequence_SO=chromosome | SO=protein_coding | is_pseudo=false	17	17	17	17	17	17	17	17	17	17	17	17	204	77291.6	89256.9	80533.9	81453.3	82646.9	65500	84519	75887.5	55827.6	74831.9	72151.3	61531		82133.9	77138.4	66085.5	225358		1.24284	1.16725		0.0279509	0.124914
transcript=PF3D7_0724600.1	>PF3D7_0724600.1-p1 | transcript=PF3D7_0724600.1 | gene=PF3D7_0724600 | organism=Plasmodium_falciparum_3D7 | gene_product=protein kinase, putative | transcript_product=protein kinase, putative | location=Pf3D7_07_v3:1026444-1033077(-) | protein_length=2041 | sequence_SO=chromosome | SO=protein_coding | is_pseudo=false	23	23	23	23	23	23	23	23	23	23	23	23	276	72617.3	58596.5	66774.6	58112.8	57344.4	58377.6	54684.9	73069.8	26255.4	48384.4	24073.2	78269.2		64025.3	60869.2	44245.6	169140		1.44704	1.37571		0.215679	0.284542
transcript=PF3D7_0725300.1	>PF3D7_0725300.1-p1 | transcript=PF3D7_0725300.1 | gene=PF3D7_0725300 | organism=Plasmodium_falciparum_3D7 | gene_product=conserved protein, unknown function | transcript_product=conserved protein, unknown function | location=Pf3D7_07_v3:1072202-1074754(-) | protein_length=793 | sequence_SO=chromosome | SO=protein_coding | is_pseudo=false	4	4	4	4	4	4	4	4	4	4	4	4	48	29395.6	26771.4	21380.3	21554	27759.3	26726.8	26828.8	26038.7	16496.1	27040.4	24980	27462.3		24775.3	26838.4	23994.7	75608.4		1.03253	1.11851		0.817945	0.348499
transcript=PF3D7_0726300.1	>PF3D7_0726300.1-p1 | transcript=PF3D7_0726300.1 | gene=PF3D7_0726300 | organism=Plasmodium_falciparum_3D7 | gene_product=DNA mismatch repair protein PMS1, putative | transcript_product=DNA mismatch repair protein PMS1, putative | location=Pf3D7_07_v3:1104156-1108364(+) | protein_length=1330 | sequence_SO=chromosome | SO=protein_coding | is_pseudo=false	3	3	3	3	3	3	3	3	3	3	3	3	36	41419.7	17650.6	31834.6	32291.8	44647.7	29481.6	39816.1	49917.9	43665.2	31886.3	37490.6	34237.6		30799.2	40965.8	36819.9	108585		0.836481	1.1126		0.331131	0.44955
transcript=PF3D7_0726400.1	>PF3D7_0726400.1-p1 | transcript=PF3D7_0726400.1 | gene=PF3D7_0726400 | organism=Plasmodium_falciparum_3D7 | gene_product=conserved Plasmodium membrane protein, unknown function | transcript_product=conserved Plasmodium membrane protein, unknown function | location=Pf3D7_07_v3:1108831-1124492(-) | protein_length=4944 | sequence_SO=chromosome | SO=protein_coding | is_pseudo=false	25	25	25	25	25	25	25	25	25	25	25	25	300	136425	111715	22061.5	82522.2	122510	68445	97248.6	95593.9	115855	92674.4	96827.8	115537		88180.9	95949.5	105224	289354		0.838033	0.911862		0.545187	0.497571
transcript=PF3D7_0726500.1	>PF3D7_0726500.1-p1 | transcript=PF3D7_0726500.1 | gene=PF3D7_0726500 | organism=Plasmodium_falciparum_3D7 | gene_product=ubiquitin carboxyl-terminal hydrolase, putative | transcript_product=ubiquitin carboxyl-terminal hydrolase, putative | location=Pf3D7_07_v3:1126556-1136577(-) | protein_length=3183 | sequence_SO=chromosome | SO=protein_coding | is_pseudo=false	42	42	42	42	42	42	42	42	42	42	42	42	504	244924	412173	161238	314457	360436	252520	313149	327653	362445	244673	244365	333281		283198	313439	296191	892828		0.956134	1.05824		0.840832	0.66624
transcript=PF3D7_0727400.1	>PF3D7_0727400.1-p1 | transcript=PF3D7_0727400.1 | gene=PF3D7_0727400 | organism=Plasmodium_falciparum_3D7 | gene_product=proteasome subunit alpha type-5, putative | transcript_product=proteasome subunit alpha type-5, putative | location=Pf3D7_07_v3:1162710-1163831(+) | protein_length=256 | sequence_SO=chromosome | SO=protein_coding | is_pseudo=false	28	28	28	28	28	28	28	28	28	28	28	28	336	4.15295e+06	3.39526e+06	3.91027e+06	3.77277e+06	4148751	3.73217e+06	4.13119e+06	3.77726e+06	4276001	4.02227e+06	3.93512e+06	4.44933e+06		3.80781e+06	3.94734e+06	4.17068e+06	1.19258e+07		0.912996	0.946451		0.11964	0.217921
transcript=PF3D7_0727800.1	>PF3D7_0727800.1-p1 | transcript=PF3D7_0727800.1 | gene=PF3D7_0727800 | organism=Plasmodium_falciparum_3D7 | gene_product=cation transporting ATPase, putative | transcript_product=cation transporting ATPase, putative | location=Pf3D7_07_v3:1175944-1181700(+) | protein_length=1918 | sequence_SO=chromosome | SO=protein_coding | is_pseudo=false	37	37	37	37	37	37	37	37	37	37	37	37	444	178908	230536	46953.9	44699.3	222186	116852	170257	57421.6	139204	143170	34962.5	137712		125274	141679	113762	380716		1.1012	1.2454		0.839848	0.551687
transcript=PF3D7_0728000.1	>PF3D7_0728000.1-p1 | transcript=PF3D7_0728000.1 | gene=PF3D7_0728000 | organism=Plasmodium_falciparum_3D7 | gene_product=eukaryotic translation initiation factor 2 subunit alpha | transcript_product=eukaryotic translation initiation factor 2 subunit alpha | location=Pf3D7_07_v3:1191179-1192289(-) | protein_length=329 | sequence_SO=chromosome | SO=protein_coding | is_pseudo=false	30	30	30	30	30	30	30	30	30	30	30	30	360	720533	624317	724853	734368	788083	683629	749194	611560	713788	698143	759959	652365		701018	708116	706064	2.1152e+06		0.992853	1.00291		0.886905	0.965189
transcript=PF3D7_0728600.1	>PF3D7_0728600.1-p1 | transcript=PF3D7_0728600.1 | gene=PF3D7_0728600 | organism=Plasmodium_falciparum_3D7 | gene_product=RING zinc finger protein, putative | transcript_product=RING zinc finger protein, putative | location=Pf3D7_07_v3:1218426-1225473(+) | protein_length=2162 | sequence_SO=chromosome | SO=protein_coding | is_pseudo=false	7	7	7	7	7	7	7	7	7	7	7	7	84	41270.4	27713.3	42115.4	17985.2	35611.4	20464.6	45528.2	48959.2	46280.6	36879	16470	49728.2		32271.1	37640.8	37339.4	107251		0.864262	1.00807		0.612217	0.976548
transcript=PF3D7_0729000.1	>PF3D7_0729000.1-p1 | transcript=PF3D7_0729000.1 | gene=PF3D7_0729000 | organism=Plasmodium_falciparum_3D7 | gene_product=signal recognition particle subunit SRP9 | transcript_product=signal recognition particle subunit SRP9 | location=Pf3D7_07_v3:1235699-1236707(+) | protein_length=103 | sequence_SO=chromosome | SO=protein_coding | is_pseudo=false	3	3	3	3	3	3	3	3	3	3	3	3	36	67672.7	76425.6	62376.1	70225.7	80633.2	67815.6	78636	100871	59865.3	65486.1	43864.8	66507.3		69175	81988.9	58930.9	210095		1.17383	1.39127		0.15155	0.0399369
transcript=PF3D7_0729100.1	>PF3D7_0729100.1-p1 | transcript=PF3D7_0729100.1 | gene=PF3D7_0729100 | organism=Plasmodium_falciparum_3D7 | gene_product=conserved Plasmodium protein, unknown function | transcript_product=conserved Plasmodium protein, unknown function | location=Pf3D7_07_v3:1238446-1246188(+) | protein_length=2580 | sequence_SO=chromosome | SO=protein_coding | is_pseudo=false	45	45	45	45	45	45	45	45	45	45	45	45	540	89318.1	111952	74168.9	79461.8	110251	63810.1	86740.8	111397	93959.7	79759.9	83830.9	76287.8		88725.1	93049.6	83459.6	265234		1.06309	1.11491		0.59585	0.469557
[truncated: 1,051 more rows]

## Sheet: Data S1 TSP Exp 2
Data S1. Related to Fig 3. Experiment 2 TSP data
[truncated: 1,888 more rows]
