# Supplementary material for: Chemoproteomics validates selective targeting of Plasmodium M1 alanyl aminopeptidase as an antimalarial strategy
Source: eLife. 2024 Jul 8;13:RP92990. doi: 10.7554/eLife.92990 (PMC11230628; doi:10.7554/eLife.92990)
Supplement: Figure 3—source data 2. [file elife-92990-fig3-data2.xlsx]

## Sheet: Data S2
Data S2. Related to Fig. 3. TSP joint volcano plot data
	1 µM MIPS2673 TSP				4 µM MIPS2673 TSP
name	cond1:fc	cond1:pval	cond2:fc	cond:pval	cond1:fc	cond1:pval	cond2:fc	cond:pval
A0A024RA52;P25787	0.952335	0.839045	0.908432	0.419415	1.03149	0.881436	0.969287	0.724741
A0A075B7C0;A0A0C4DGQ5;K7EIV0;K7ELJ7;P04632;U3KQE2	1.91516	0.000124003	0.903884	0.512951	1.50004	0.140751	0.712503	0.0484773
A0A087WUQ6;P07203	1.1014	0.310982	1.03055	0.682447	1.11149	0.20203	0.98014	0.782176
A0A087WVQ6;Q00610	0.913243	0.617353	0.982086	0.833062	0.864138	0.272942	1.07943	0.246798
A0A087WW66;Q99460	0.97331	0.921439	1.05552	0.598163	1.01463	0.923525	1.11117	0.381857
A0A087WY55;Q9NP79	1.27056	0.425829	1.06402	0.524686	0.900716	0.802533	1.12011	0.219046
A0A087X1Z3;Q9UL46	1.01325	0.952022	1.04026	0.823771	1.23969	0.371026	1.32029	0.142963
A0A087X2I1;P62333	1.16368	0.209444	0.984575	0.909445	1.14365	0.410136	1.00265	0.987184
A0A0A0MRA3;A0A0A0MTS7;Q8WZ42	1.00973	0.888563	1.09772	0.42068	1.03805	0.518041	0.983608	0.855305
A0A0A0MSI0;Q06830	1.0981	0.293662	1.05397	0.535065	1.08309	0.375642	0.978249	0.74964
A0A0C4DGK4;A0A0U1RQC5;A0A0U1RRJ0;Q9HDB5;Q9Y4C0	2.2504	0.0704457	1.21923	0.606975	1.54327	0.0701765	1.19564	0.558268
A0A0G2JIW1;P0DMV8;P0DMV9	0.805398	0.126211	0.879717	0.187919	0.766214	0.0457078	0.929489	0.336921
A0A140T9R1;O75955	1.18687	0.461411	2.56612	0.0885503	1.20157	0.446421	2.32135	0.153444
A0A1B0GWG0	0.76131	0.472092	1.22117	0.63166	0.51291	0.164252	1.06741	0.773227
A6NFX8;Q9UKK9	1.16802	0.0359718	0.891157	0.317797	1.15819	0.213946	0.858617	0.0811683
A6NJA2;P54578	1.00996	0.974023	0.883921	0.184129	0.851391	0.641589	0.99133	0.924617
B0YIW2;P02656	1.16877	0.0637809	0.970618	0.629318	1.13132	0.102084	0.91806	0.0875142
B1AUU8;P42566	1.04836	0.856262	1.15761	0.353147	1.5025	0.103732	0.980236	0.891556
B4DUC8;F2Z2F3;J3QSB7;Q13126	0.906948	0.565794	1.23496	0.210573	0.717336	0.329195	0.993997	0.973398
B4DUR8;P49368	0.46	0.0424663	0.936368	0.633162	0.608448	0.0498461	0.943377	0.655829
B4DV12;F5GXK7;F5GYU3;F5H265;F5H2Z3;F5H388;F5H6Q2;F5H747;J3QKN0;J3QS39;J3QTR3;P0CG47;P0CG48;P62979;P62987;Q5PY61;Q96C32	0.982262	0.752648	1.10391	0.261885	1.07905	0.237256	0.828489	0.0223862
B7ZAR1;E7ENZ3;E9PCA1;P48643	0.964035	0.834866	1.08018	0.465482	0.94364	0.768973	1.13926	0.201381
C9J4W5;C9J7B5;F8WCJ1;I3L397;I3L504;P63241;Q6IS14;Q9GZV4	1.02941	0.937393	0.864938	0.307209	1.02558	0.942871	0.950143	0.689003
C9JIF9;P13798	0.965886	0.376176	0.999857	0.998066	1.07707	0.097819	0.937103	0.286946
D6RF62;P22234	1.62871	0.211579	0.828553	0.606537	2.34431	0.0406879	0.703084	0.339986
E5RJR5;P63208	1.03754	0.505836	1.10864	0.279449	1.13735	0.26107	1.05975	0.519647
E7END7;P62820;Q9H0U4	0.900701	0.208543	0.922338	0.0271007	0.892791	0.182985	0.983999	0.756684
E7ENY0;E7EV99;P35611	0.936429	0.332299	0.925384	0.543967	0.981679	0.831264	1.03095	0.733306
E7EPV7;H6UYS7;P37840	1.19434	0.164743	0.991782	0.931652	1.27085	0.0160069	1.01193	0.919871
E7EX29;P63104	1.02982	0.83541	1.06909	0.580173	1.11664	0.352535	1.00869	0.950896
E9PKD5;E9PM69;P17980;R4GNH3	1.12712	0.381884	1.41896	0.0801949	1.05331	0.674502	1.309	0.052807
E9PLK3;P55786	0.516024	0.028704	1.12626	0.0429722	0.669389	0.148191	1.11913	0.158385
F5GX23;F5H5V4;F5H7X1;J3KN29;O00233	1.08149	0.390113	0.897846	0.839204	1.08083	0.396175	0.549441	0.242792
F5H2F4;P11586	0.925338	0.478497	1.04523	0.481753	0.975341	0.782114	1.00427	0.949868
F8W1I6;Q13561	0.954385	0.541914	1.25617	0.398824	0.960253	0.695484	0.977575	0.933752
G3V180;G3V1D3;Q9NY33	1.00105	0.994453	0.847059	0.102065	0.816181	0.15348	1.05073	0.218768
G3V5Z7;P60900	0.948575	0.126656	1.01553	0.725454	1.00295	0.928628	0.964423	0.335877
G5E977;Q6XQN6	0.911729	0.692819	1.18308	0.199176	0.722129	0.298558	1.21943	0.160761
H0Y7A7;P0DP23;P0DP24;P0DP25	1.06013	0.519526	1.02325	0.786226	1.01177	0.871759	0.986578	0.862208
H0YH81;P06576	0.725855	0.213192	1.14572	0.653361	0.867436	0.492817	1.15727	0.615734
H0YK48	1.62936	0.345444	2.97888	0.133624	0.677525	0.579687	0.983674	0.983356
H3BPK3;Q16775	0.97184	0.785337	1.03097	0.669063	1.06738	0.528483	0.920164	0.313236
H7BYY1	1.28653	0.153186	1.05089	0.671306	1.39844	0.274865	0.92132	0.289864
H7BZ94;P07237	1.31035	0.238941	0.994605	0.964052	1.38195	0.167353	0.8505	0.226613
I3L0N3;P46459	1.08219	0.550762	0.91793	0.890161	0.705927	0.2606	0.904583	0.871234
J3KNF4;O14618	1.06636	0.704037	1.09943	0.535931	0.947526	0.713625	0.920771	0.493002
J3KPS3;P04075	1.06494	0.559149	1.00131	0.981237	1.15419	0.173654	0.961449	0.579529
J3KT12;J3KTB5;P60842	0.825752	0.612983	1.09097	0.828309	0.320102	0.0677513	1.45058	0.263749
K7ER96;O43396	0.724269	0.3836	0.965801	0.404449	0.695733	0.335652	1.17175	0.233469
O00231	1.80235	0.125581	0.970039	0.859893	1.05776	0.846223	1.28059	0.290028
O00232	2.04489	0.11617	0.877613	0.601752	1.16492	0.211395	1.11828	0.662648
O00487	0.780184	0.186011	1.011	0.914682	1.01899	0.945982	1.09736	0.23439
O00743	1.2116	0.513136	0.921853	0.751531	1.05501	0.761216	0.626886	0.21591
O14818	0.75901	0.0641129	0.936507	0.261735	0.791374	0.0916711	0.898766	0.161075
O14980	0.80009	0.205499	0.864871	0.217554	0.941912	0.745638	0.938249	0.49828
O15400	1.23785	0.147676	1.08844	0.29984	1.29975	0.0262038	0.894375	0.347416
O43765	0.915259	0.539867	1.11447	0.460471	0.875664	0.367116	1.00494	0.970937
O75368	0.975247	0.819306	0.961423	0.581746	1.05268	0.716728	0.976309	0.745595
O75695	0.806771	0.452299	0.833395	0.628345	0.781229	0.367555	1.07169	0.482772
O76003	1.01228	0.938047	1.0294	0.84732	1.11175	0.501917	1.11559	0.426849
O95747	1.1587	0.122748	0.92302	0.47242	1.14174	0.21069	0.929255	0.667092
P00338	0.875036	0.208708	1.08427	0.225155	0.917708	0.395109	0.990939	0.818403
P00352	0.901045	0.355433	1.00575	0.939429	1.00636	0.948476	0.930646	0.187804
P00390	1.03721	0.646824	0.992527	0.910256	1.09437	0.219805	0.975397	0.727302
P00441	0.963422	0.858542	0.969471	0.756613	0.960294	0.798555	0.838633	0.0689276
P00491	0.913699	0.0806641	0.917086	0.0861024	0.914007	0.284098	0.983836	0.69358
P00492	1.0564	0.611798	0.790263	0.168296	1.11801	0.413679	0.998162	0.984775
P00558	0.847967	0.393046	0.64309	0.152361	0.849686	0.0559131	0.809341	0.491007
P00915	0.873387	0.223189	0.906904	0.155232	0.853202	0.247607	0.9367	0.435556
P00918	0.690207	0.257951	1.15131	0.264479	0.482393	0.0771459	1.1978	0.0116617
P02042	1.0495	0.559173	0.996615	0.977369	1.04696	0.668664	1.0452	0.652877
P02549	1.05905	0.445649	1.0674	0.345201	1.17144	0.0524388	0.971997	0.692492
P02730	1.06691	0.668403	1.08881	0.573881	0.956402	0.687246	0.970505	0.846637
P04040	1.03967	0.0802573	1.02643	0.605959	1.0944	0.126703	0.98837	0.819906
P04264	1.05795	0.933374	0.477682	0.387103	1.65712	0.551987	0.565913	0.473253
P04350;P68371	0.324134	0.374708	1.26764	0.839461	0.276568	0.346778	0.193134	0.36777
P04406	0.815388	0.00787819	0.890231	0.275395	0.958187	0.52163	0.967974	0.571836
P06703;R4GN98	1.51116	0.169701	1.0917	0.676196	1.07067	0.832461	0.901328	0.664009
P06753	1.07084	0.290115	1.04626	0.64905	1.05224	0.477098	0.958431	0.674448
P07195	0.957029	0.312271	1.03853	0.370372	0.975232	0.551183	1.05745	0.309968
P07384	1.07702	0.811604	0.964193	0.537814	0.686099	0.282154	1.06762	0.184462
P07738	1.05889	0.349167	1.02633	0.798896	1.11144	0.204745	0.919385	0.499751
P07900	0.986753	0.915743	1.01128	0.745361	0.868301	0.0714195	0.98928	0.749953
P08238	1.05013	0.479112	1.09046	0.0686217	1.13777	0.256853	1.15849	0.0535454
P09211	0.818175	0.0402163	1.02023	0.7842	0.764317	0.00548807	0.966602	0.800766
P10599	1.02214	0.866874	0.465131	0.0907727	1.01791	0.872524	0.912512	0.347127
P10644	0.865892	0.552627	0.964144	0.896064	0.970275	0.878189	0.978126	0.850594
P11142	0.917324	0.0186343	0.991694	0.953664	0.923259	0.188657	0.900803	0.374086
P11166	0.831058	0.458981	1.1478	0.542862	1.03164	0.935678	1.16887	0.444662
P11277	0.935207	0.539998	1.27018	0.0331903	0.986988	0.892059	1.08726	0.488649
P12955	0.748605	0.102425	1.39983	0.109921	0.627362	0.0204	1.19901	0.40481
P13489	1.33973	0.0709327	0.889187	0.441524	1.24085	0.202769	0.781294	0.127856
P13645	0.622646	0.615006	0.798074	0.688321	2.97766	0.464303	1.09997	0.874552
P13647	0.990156	0.985099	0.555435	0.533815	1.91242	0.524943	0.440813	0.435323
P13716	0.927742	0.421519	1.16306	0.0223075	0.914867	0.422913	1.09676	0.398301
P13796	1.08659	0.641057	1.05244	0.540553	0.981151	0.922942	0.986092	0.895015
P14174	0.846384	0.39958	1.01424	0.927375	1.16332	0.41689	0.944542	0.609591
P14735	1.26675	0.233779	0.943398	0.788851	1.25135	0.187834	1.07924	0.680709
P15531	1.07374	0.616477	1.11456	0.0517566	1.05876	0.404874	0.989773	0.829228
P16083;Q5TD05;Q5TD07	1.14157	0.834728	0.56279	0.500365	1.98019	0.391487	1.69555	0.253814
P16157	1.25384	0.113682	1.01967	0.823693	1.16043	0.229159	0.923113	0.155684
P17174	0.670055	0.132031	1.06693	0.387033	0.870954	0.419633	0.985316	0.827461
P17987	1.55406	0.164143	0.842582	0.343521	4.33773	0.0351697	1.01947	0.883997
P18206	0.892607	0.140903	0.906095	0.208856	0.874288	0.229326	0.971304	0.619012
P20618	0.963433	0.401776	0.946461	0.293781	0.96434	0.551563	0.860325	0.00722298
P21980	0.997696	0.983241	0.995815	0.96764	0.974381	0.80348	1.07858	0.387725
P22314	2.99167	0.204848	1.08822	0.819864	2.97433	0.17854	1.09988	0.7806
P23526	0.873743	0.144085	0.814205	0.0101535	0.926438	0.202807	0.864136	0.0449961
P23634	1.14752	0.185108	1.109	0.289296	1.13021	0.393306	1.04883	0.64156
P24666	0.953821	0.841492	1.5879	0.233627	0.763189	0.305448	1.33819	0.424414
P25786	0.892979	0.140945	1.11112	0.0045454	0.876504	0.126637	1.05767	0.13616
P25788	0.981683	0.783136	0.943675	0.177219	0.993463	0.902041	0.985102	0.55064
P26447	1.09212	0.190011	0.925934	0.300301	1.14857	0.0615464	0.880171	0.270201
P27348	0.888549	0.443411	1.29483	0.022685	1.03023	0.866857	1.02252	0.849614
P28066	0.905359	0.205116	1.05698	0.132632	0.860495	0.0742436	0.965417	0.440093
P28070	0.675308	0.477166	1.05566	0.204594	1.13523	0.778107	0.977005	0.61797
P28072	0.948191	0.181467	1.03751	0.530067	0.923238	0.192769	0.952071	0.298958
P28074	0.911485	0.260378	1.01922	0.332461	0.983593	0.645614	0.94421	0.0709724
P28289	1.1981	0.00728234	1.17759	0.216805	1.11621	0.431712	1.06748	0.447038
P29144;Q5VZU9	1.47084	0.230789	1.08358	0.362977	1.03141	0.933403	1.06694	0.671392
P30041	0.850561	0.181805	1.03344	0.279994	0.865828	0.161642	0.96696	0.337311
P30043	1.14434	0.0510088	0.985981	0.607979	1.03014	0.579521	1.01048	0.856379
P30086	0.968246	0.805749	0.998838	0.992619	1.1098	0.701259	0.973443	0.773371
P30613	1.25021	0.163335	0.855509	0.141645	1.17041	0.425746	0.870895	0.227016
P30740	0.761522	0.362022	0.892254	0.635413	1.00352	0.990321	0.769292	0.398473
P31939	0.91749	0.436768	0.878966	0.354219	0.908839	0.558453	0.954602	0.682108
P31946	1.2122	0.321131	0.838264	0.226125	1.17641	0.373721	0.987024	0.893552
P31948	0.598609	0.0593376	0.996758	0.9849	0.862141	0.336263	0.982461	0.904181
P32119	0.823936	0.0454965	1.11086	0.308993	0.838579	0.0951794	0.992458	0.911968
P34932	0.699483	0.260121	0.66039	0.121527	0.729764	0.277356	0.93354	0.747803
P35527	1.71079	0.41272	0.172848	0.295457	2.21641	0.327983	0.423258	0.444654
P35579	1.03497	0.820686	1.28098	0.308002	0.87064	0.476805	1.20508	0.146974
P35612	1.26377	0.0361808	0.981875	0.887318	1.13984	0.286603	1.1448	0.0885239
P35754	0.929525	0.686848	1.06157	0.670566	1.07072	0.509147	0.933526	0.645393
P35908	0.75418	0.758848	0.596333	0.52117	2.65578	0.465156	0.774653	0.714701
P35998	1.02461	0.923405	1.00457	0.973236	0.794484	0.309562	0.925856	0.593169
P36959	0.938598	0.31135	1.02286	0.843501	0.929356	0.48299	0.974816	0.822171
P37837	1.0074	0.948336	1.02874	0.73502	1.18079	0.090367	0.960355	0.515306
P38606	0.557736	0.0284907	0.947116	0.715176	0.767667	0.127536	0.927297	0.632763
P40227	0.938448	0.808616	0.859208	0.0164779	1.24208	0.299727	0.913794	0.121994
P40925	1.19118	0.75132	0.910343	0.147697	0.920569	0.861898	0.949691	0.4502
P41091	1.04152	0.850251	1.19222	0.121188	1.24038	0.0503036	1.08568	0.420034
P43034	1.71083	0.0166118	1.17464	0.403618	1.77834	0.00904255	1.2215	0.123323
P43686	1.17978	0.265231	1.05284	0.472347	1.17723	0.177848	1.01253	0.891862
P45974	0.775095	0.29193	1.36605	0.0399465	0.731935	0.23762	1.2515	0.145302
P48147	1.13375	0.588508	0.667501	0.0457783	1.39422	0.196589	0.810628	0.252276
P48426	1.08744	0.415331	0.821926	0.0565979	1.153	0.0409851	0.802316	0.0371857
P48507	1.20812	0.188131	0.686649	0.0035412	1.1416	0.50886	0.80222	0.213201
P48637	1.00743	0.846487	1.03634	0.678029	0.938697	0.177518	1.0169	0.846573
P49247	0.746666	0.312019	0.886264	0.110775	0.817447	0.611164	0.864389	0.00431889
P49454	1.1058	0.392159	1.05234	0.369069	0.958337	0.823786	1.01615	0.779499
P49720	1.39319	0.315481	1.03013	0.888021	1.30489	0.391592	0.843695	0.458459
P49721	1.00431	0.978638	1.08504	0.427601	1.01844	0.917116	1.05966	0.571699
P50395	1.26158	0.271467	1.13473	0.132629	1.2504	0.319881	1.00284	0.964806
P50570	0.552343	0.404212	0.637266	0.102353	0.762579	0.664149	0.696346	0.153123
P50990	1.02392	0.781564	1.12865	0.182762	1.09267	0.237753	1.04731	0.514226
P50991	0.975478	0.815602	1.04248	0.901413	0.835514	0.323918	1.11236	0.710731
P51148	1.41538	0.200328	0.916379	0.564574	1.14386	0.706142	1.07471	0.686641
P53396	0.988586	0.963339	0.855277	0.256765	0.684275	0.209234	1.04559	0.704006
P54725	1.1385	0.521746	0.992807	0.956271	1.25699	0.0761046	0.845209	0.060419
P54727	0.807263	0.560616	1.11439	0.795019	0.937483	0.85324	0.662523	0.0593221
P55072	0.984061	0.704075	1.2132	0.00918376	0.910844	0.0452204	1.09035	0.141283
P60174	1.01419	0.904286	1.05307	0.371664	1.0405	0.686956	0.96074	0.52964
P60709	0.998153	0.967702	1.08502	0.0446338	1.07934	0.185311	1.03438	0.497063
P60891	0.895429	0.61317	0.693152	0.0578087	0.932128	0.4204	0.83271	0.305458
P61225	0.337569	0.247236	0.845809	0.421085	0.517879	0.377529	1.76607	0.309773
P61970	1.10119	0.383515	1.07402	0.400966	1.14626	0.181168	0.97427	0.754267
P61981	1.01766	0.857176	0.909105	0.436719	1.16674	0.099414	0.805992	0.0839484
P62191	1.38079	0.222761	1.3463	0.66578	1.0613	0.585393	1.99581	0.359255
P62195	1.07297	0.571431	0.99024	0.946597	1.09887	0.243885	0.866547	0.314353
P62258	0.928523	0.63093	1.0333	0.403056	0.864023	0.342642	0.971627	0.466139
P62805	1.03823	0.715326	0.863483	0.331872	0.90219	0.278219	0.987982	0.890529
P62834	1.16214	0.269942	1.18081	0.0472753	1.06167	0.634616	1.17366	0.258683
P62937	1.02296	0.906565	1.00608	0.981964	0.895985	0.390999	0.755029	0.217663
P63261	0.972659	0.903643	0.8392	0.440659	1.16535	0.562434	0.935204	0.789066
P67775	1.15906	0.0282205	1.77319	0.166663	0.898638	0.743866	1.90742	0.122167
P68871	1.00242	0.975622	1.08012	0.341768	1.02112	0.801403	0.965223	0.619311
P69891	0.955224	0.743537	1.13599	0.460417	0.99046	0.954128	0.975832	0.888953
P69892	0.868755	0.743126	1.20521	0.64528	1.36628	0.647493	0.773965	0.610149
P69905	1.05132	0.814745	1.01046	0.926541	0.880971	0.655603	0.921821	0.470092
P78417;Q5TA02	1.88138	0.00535103	0.895097	0.160345	1.64969	0.0229363	0.957201	0.569501
Q00013	0.967504	0.742773	1.14351	0.0349944	1.0672	0.547041	1.01407	0.866974
Q01518	1.11044	0.687165	1.03143	0.898284	1.03653	0.881762	0.931972	0.627232
Q04760	0.933911	0.254379	0.886505	0.419929	0.664728	0.0375565	0.803084	0.0354868
Q06323	1.14466	0.240671	0.992032	0.935776	1.12156	0.144831	0.905156	0.369972
Q08495	1.00631	0.95078	1.06458	0.550084	0.995469	0.960878	0.960545	0.677179
Q13158	0.474837	0.387646	1.85759	0.346447	0.359606	0.307129	1.51775	0.324602
Q13200	1.02893	0.846585	1.1393	0.290775	1.14251	0.435869	1.13819	0.204559
Q13228	0.99788	0.969734	1.11894	0.0819146	1.01963	0.810407	1.06008	0.504202
Q13630	1.51154	0.0756433	0.961415	0.778221	1.67247	0.0772786	1.12117	0.310781
transcript=PF3D7_0604300.1	2.67333	0.00662279	1.86767	0.000280199	4.21819	0.0268182	2.64324	0.00625344
Q14974	0.942082	0.630944	0.620619	0.36298	0.882853	0.298097	0.76879	0.608707
Q14C86	1.22576	0.345898	0.846085	0.381609	1.21724	0.338783	0.79354	0.304382
Q15008	0.997854	0.98709	0.769551	0.252856	1.74362	0.385355	0.945189	0.744178
Q16401	0.894048	0.423344	0.904055	0.512074	0.863327	0.207685	1.0849	0.556968
Q4VB86	1.00893	0.936026	1.42241	0.416074	1.00485	0.960191	1.20705	0.328885
Q53FA7	0.990041	0.909064	1.06345	0.711115	0.857441	0.200088	0.912073	0.424073
Q5HYB6	1.24683	0.240209	0.990238	0.942072	1.24944	0.0532114	0.935747	0.517507
Q5QPM7;Q5QPM9;Q92530	0.771218	0.212498	1.30794	0.18642	0.769385	0.278497	1.46562	0.0175853
Q5TDH0	1.1075	0.425324	1.19303	0.186257	1.13277	0.323642	1.13805	0.305316
Q5XPI4	1.07644	0.751362	0.816405	0.396624	0.86859	0.56941	0.776637	0.120657
Q6B0K9	0.634973	0.3769	0.932379	0.732594	0.312682	0.0715384	1.59536	0.138623
Q6UWP2	3.64903	0.0145871	0.898903	0.639518	2.81406	0.0445036	0.867079	0.380014
Q86VP6	1.35276	0.0630425	1.01599	0.898864	1.38825	0.0586502	1.17581	0.348031
Q8IUE6	0.87678	0.530671	0.866382	0.421874	0.706264	0.144881	0.955608	0.742526
Q8IVF2	1.0324	0.787119	1.03225	0.785259	1.06329	0.692361	1.0479	0.834049
Q8IZ83	0.84659	0.28141	1.23248	0.0930031	0.855841	0.292027	1.22082	0.140294
Q8NCW5	0.793921	0.29287	1.10642	0.545272	0.938253	0.727499	1.11393	0.53539
Q93008	1.39476	0.0810289	0.978864	0.922944	1.16255	0.314463	1.25484	0.260483
Q96CD2	0.779978	0.246771	1.10059	0.686144	0.893138	0.627752	1.38396	0.0761922
Q99832	1.31429	0.507762	0.910734	0.420672	1.31348	0.431351	1.00345	0.969521
Q9BRA2	0.751671	0.0990406	1.08445	0.270825	1.18313	0.0452996	0.923172	0.246699
Q9BRF8	0.914205	0.635249	1.06519	0.645663	1.0947	0.606851	1.18436	0.0938352
Q9BSL1	0.97083	0.662477	1.0505	0.757815	0.834045	0.229203	0.912347	0.560587
Q9BVM4	1.07845	0.578175	1.03099	0.686825	1.1686	0.386264	0.9356	0.453777
Q9GZT8	1.05903	0.597486	1.04869	0.556203	1.22577	0.467803	0.964095	0.473843
Q9H2M9	1.04694	0.800911	0.772549	0.150539	0.896382	0.710274	0.991576	0.953851
Q9HAB8	1.17541	0.520897	1.30581	0.231372	1.22545	0.458771	1.28687	0.2539
Q9UIA9	1.14668	0.484134	1.10611	0.625391	1.17377	0.374823	1.27821	0.22169
Q9UNZ2	1.01937	0.837794	1.08385	0.139802	1.10394	0.163223	0.943809	0.65107
Q9Y315	0.864024	0.701366	0.765748	0.385306	1.0321	0.929573	1.07386	0.672384
Q9Y3I1	0.593052	0.07921	0.962018	0.617107	0.505482	0.0415373	0.883172	0.345089
Q9Y4E8	0.618236	0.0778908	1.01873	0.940368	0.584619	0.0832567	0.950137	0.764586
transcript=PF3D7_0102200.1	1.01839	0.942619	1.28129	0.335854	1.18006	0.544759	1.38445	0.101781
transcript=PF3D7_0102500.1	0.835451	0.347112	1.17346	0.146447	1.35967	0.256647	1.00306	0.972218
transcript=PF3D7_0102900.1	0.998322	0.984174	0.876992	0.110466	0.988116	0.830151	0.988127	0.827595
transcript=PF3D7_0103300.1	0.978475	0.788268	0.817537	0.197735	0.946388	0.320612	0.888905	0.452606
transcript=PF3D7_0103900.1	0.713708	0.36888	0.979415	0.821311	0.820664	0.466777	0.741405	0.0233897
transcript=PF3D7_0104200.1	1.05851	0.527418	1.00854	0.938621	1.18975	0.10887	1.0121	0.865147
transcript=PF3D7_0104300.1	0.861728	0.64808	1.14979	0.58199	0.930578	0.729952	0.860203	0.528525
transcript=PF3D7_0104400.1	0.85258	0.0681984	0.880973	0.0412075	0.906008	0.332519	0.910043	0.246431
transcript=PF3D7_0104500.1	1.27711	0.0831304	1.16969	0.0134981	1.14486	0.103018	0.94402	0.810572
transcript=PF3D7_0105200.1	0.774782	0.301442	1.04174	0.715167	0.8837	0.567177	0.897194	0.391058
transcript=PF3D7_0105800.1	0.674312	0.028055	1.02192	0.842908	0.673846	0.119757	0.888651	0.275857
transcript=PF3D7_0106100.1	1.14234	0.750972	0.832649	0.252212	1.02986	0.951602	0.868257	0.442742
transcript=PF3D7_0106300.1	1.00209	0.988389	1.0395	0.532179	0.985367	0.903206	0.991075	0.897371
transcript=PF3D7_0106400.1	1.09595	0.280888	1.09376	0.398326	1.18668	0.0861721	1.00524	0.959278
transcript=PF3D7_0106700.1	0.83421	0.481371	0.819082	0.496605	0.91906	0.673871	1.18752	0.348425
transcript=PF3D7_0107000.1	1.00017	0.999181	1.01332	0.919264	1.04991	0.743659	1.09856	0.583001
transcript=PF3D7_0107500.1	1.17032	0.105672	1.1185	0.289097	1.19669	0.0475563	0.986513	0.923871
transcript=PF3D7_0108000.1	0.920439	0.296632	1.04385	0.483858	0.964928	0.339058	1.03091	0.283973
transcript=PF3D7_0108300.1	1.09259	0.37488	1.08795	0.31712	1.0665	0.491512	0.977382	0.747573
transcript=PF3D7_0108500.1	1.19274	0.0765324	0.988623	0.881162	1.25921	0.0161594	0.970838	0.759113
transcript=PF3D7_0108700.1	1.00928	0.9258	1.02825	0.796304	1.06104	0.568644	0.938135	0.587354
transcript=PF3D7_0109000.1	1.13342	0.71769	0.862568	0.443496	1.09606	0.786368	1.04484	0.613447
transcript=PF3D7_0109200.1	1.16868	0.79322	1.0416	0.685176	1.5307	0.147479	0.845148	0.574058
transcript=PF3D7_0109400.1	0.728739	0.135532	1.07463	0.751581	0.755771	0.184944	1.14361	0.461381
transcript=PF3D7_0109800.1	1.36288	0.445275	1.08935	0.598478	1.46526	0.234551	1.05711	0.829534
transcript=PF3D7_0110400.1	1.20217	0.246447	1.0944	0.348432	1.20487	0.203091	1.02604	0.757395
transcript=PF3D7_0110500.1	1.11637	0.357845	1.14139	0.0808756	1.23962	0.0858069	1.02049	0.809274
transcript=PF3D7_0110600.1	0.635768	0.113699	1.37583	0.0787268	0.641975	0.096126	1.3051	0.0405417
transcript=PF3D7_0110700.1	1.10724	0.0445029	0.842551	0.731708	1.21115	0.0726241	0.938935	0.880503
transcript=PF3D7_0110800.1	0.914598	0.532375	0.769795	0.444928	1.27685	0.251366	0.669513	0.252781
transcript=PF3D7_0111400.1	1.00914	0.973878	1.06382	0.0685725	0.958481	0.889973	1.01796	0.445705
transcript=PF3D7_0112000.1	0.875526	0.641889	0.998831	0.989778	0.75337	0.409809	1.19751	0.127637
transcript=PF3D7_0113000.1	0.917098	0.559415	1.11687	0.314609	1.05628	0.653186	0.940387	0.454621
transcript=PF3D7_0202200.1	1.16665	0.0121191	1.09429	0.285634	1.10953	0.0969334	0.930727	0.388501
transcript=PF3D7_0202400.1	0.969313	0.855392	1.02905	0.802226	1.01526	0.89075	0.934993	0.539975
transcript=PF3D7_0202600.1;transcript=PF3D7_0202600.2	1.3169	0.0405012	1.14683	0.21344	1.32747	0.0640072	1.23043	0.151198
transcript=PF3D7_0203000.1	1.89081	0.246447	0.544951	0.254162	2.82062	0.0203129	1.09242	0.830506
transcript=PF3D7_0203100.1	0.851985	0.0573424	0.87953	0.0480827	0.896355	0.308855	0.916261	0.284234
transcript=PF3D7_0204100.1	0.818395	0.424136	1.07365	0.885394	0.95375	0.671346	1.55129	0.307891
transcript=PF3D7_0204500.1	1.10856	0.610566	0.566182	0.0470396	0.891809	0.629633	0.799186	0.277161
transcript=PF3D7_0204900.1	2.84037	0.0164804	2.74153	0.175471	2.37927	0.0206945	1.89277	0.476479
transcript=PF3D7_0205500.1	0.891637	0.22544	1.00592	0.949106	1.03816	0.673495	0.848948	0.0817176
transcript=PF3D7_0205600.1	0.600712	0.469173	1.2692	0.418418	0.567505	0.443402	0.937265	0.805044
transcript=PF3D7_0205900.1	1.16743	0.349568	0.791571	0.0314887	1.12818	0.403733	0.850185	0.176986
transcript=PF3D7_0206700.1	1.01954	0.878798	1.14553	0.542528	1.10085	0.35713	1.03333	0.873712
transcript=PF3D7_0206800.1	1.09569	0.615008	0.873532	0.463194	0.968208	0.841898	0.703353	0.00908649
transcript=PF3D7_0207400.1	1.06446	0.735175	0.958344	0.79498	0.889629	0.607554	0.977035	0.898467
transcript=PF3D7_0207500.1	0.973696	0.843376	1.12698	0.238551	0.747548	0.265838	1.02803	0.854471
transcript=PF3D7_0207600.1	1.10382	0.155994	1.03118	0.666516	1.11667	0.285137	0.954784	0.512479
transcript=PF3D7_0207700.1	1.00994	0.856759	1.15914	0.11565	1.1031	0.530952	1.12595	0.302545
transcript=PF3D7_0207800.1	1.23316	0.0243929	1.0648	0.460697	1.38181	0.0615793	1.01624	0.864581
transcript=PF3D7_0208500.1	1.00242	0.986593	1.16351	0.407931	0.98877	0.928919	1.0609	0.652641
transcript=PF3D7_0209800.1	0.921449	0.192336	0.894949	0.00777258	0.877276	0.152287	1.10559	0.274947
transcript=PF3D7_0210100.1	1.0448	0.368187	0.929962	0.187647	1.02972	0.774978	0.959853	0.469277
transcript=PF3D7_0210200.1	0.996355	0.979378	0.791544	0.10623	1.06804	0.458978	0.925618	0.55573
transcript=PF3D7_0210900.1	1.108	0.324723	1.06507	0.473196	1.26974	0.133426	1.13157	0.263804
transcript=PF3D7_0211800.1	0.981383	0.847231	0.865027	0.0306014	0.867325	0.188172	0.927325	0.0684269
transcript=PF3D7_0212100.1	1.14093	0.142357	1.11458	0.205005	1.0068	0.942516	1.02194	0.7149
transcript=PF3D7_0212300.1	1.08821	0.554936	1.23843	0.224604	0.759122	0.246097	0.846384	0.3853
transcript=PF3D7_0212400.1	1.01687	0.792527	0.88832	0.365301	0.899763	0.266675	1.02627	0.704481
transcript=PF3D7_0212500.1	0.921237	0.714821	1.44692	0.222718	1.06905	0.603764	1.11196	0.772483
transcript=PF3D7_0212900.1	1.14962	0.180421	1.24393	0.701527	1.01369	0.812362	0.576572	0.336005
transcript=PF3D7_0213100.1	1.09261	0.477793	1.02538	0.797536	1.0106	0.87535	0.997494	0.979187
transcript=PF3D7_0213500.1	0.803966	0.29412	1.18017	0.250991	0.926128	0.48792	1.02058	0.875783
transcript=PF3D7_0213700.1	0.874785	0.441233	1.07857	0.300279	0.953865	0.560709	0.898441	0.166566
transcript=PF3D7_0214000.1	0.928301	0.704778	0.988627	0.90938	0.823784	0.251881	1.08036	0.376075
transcript=PF3D7_0214100.1	1.00263	0.97302	1.15632	0.0159465	1.06794	0.409373	1.03163	0.618762
transcript=PF3D7_0214400.1	1.20055	0.302374	0.924474	0.539113	1.16495	0.281273	0.943945	0.606948
transcript=PF3D7_0215500.1	1.31673	0.481159	0.940395	0.777523	1.21286	0.456294	0.865377	0.322255
transcript=PF3D7_0215700.1	0.952521	0.325017	0.892315	0.37566	0.931269	0.338849	1.03559	0.690047
transcript=PF3D7_0217100.1	1.14173	0.227125	1.2572	0.00639961	1.16367	0.285466	1.23763	0.00412632
transcript=PF3D7_0217500.1	1.09549	0.366655	1.29612	0.00129838	1.05773	0.61982	1.1631	0.185252
transcript=PF3D7_0217800.1	0.928361	0.669361	1.06002	0.422583	1.03402	0.679209	0.958483	0.581049
transcript=PF3D7_0217900.1	0.9609	0.595971	0.744048	0.0475112	0.995268	0.935414	0.776361	0.0657708
transcript=PF3D7_0218000.1	0.962885	0.84667	0.796208	0.45871	1.23969	0.365242	1.1892	0.34087
transcript=PF3D7_0218200.1	1.07205	0.420598	1.0358	0.722448	1.16795	0.16052	0.997287	0.972112
transcript=PF3D7_0218500.1	0.975355	0.752338	1.01167	0.852618	1.01825	0.828372	0.928028	0.207699
transcript=PF3D7_0219400.1	0.936425	0.642559	0.786837	0.40989	0.622881	0.26075	0.786511	0.445149
transcript=PF3D7_0219600.1	1.02293	0.783288	1.16274	0.0149424	1.08539	0.523543	1.0486	0.0639867
transcript=PF3D7_0220000.1	1.20316	0.00636689	1.04595	0.635303	1.19989	0.096638	0.941244	0.49963
transcript=PF3D7_0220100.1	1.02132	0.832647	1.09301	0.214165	1.05129	0.480165	0.977118	0.822754
transcript=PF3D7_0220600.1	0.81245	0.489161	1.01874	0.905783	1.03642	0.890211	0.745051	0.0894794
transcript=PF3D7_0301400.1	1.0988	0.466155	1.00883	0.917963	1.12734	0.00366653	1.00689	0.935573
transcript=PF3D7_0301600.1	0.987573	0.922487	1.12724	0.155542	1.03697	0.779426	0.978479	0.718805
transcript=PF3D7_0301700.1	1.26799	0.0882308	1.14011	0.364138	1.25669	0.267971	0.938699	0.693534
transcript=PF3D7_0302000.1	1.21749	0.710846	0.904216	0.617882	1.54176	0.428137	1.11005	0.417018
transcript=PF3D7_0302100.1	1.26186	0.422067	0.696413	0.450327	0.912122	0.644727	0.844941	0.689951
transcript=PF3D7_0302500.1	0.95623	0.873724	0.956062	0.671978	0.82089	0.487604	0.950389	0.548867
transcript=PF3D7_0302800.1	1.01249	0.940491	1.01092	0.946236	0.77646	0.322354	0.900681	0.539592
transcript=PF3D7_0302900.1	1.10499	0.736014	0.91279	0.549957	0.808945	0.313999	0.867961	0.373761
transcript=PF3D7_0303000.1	1.68377	0.0377763	1.21943	0.0566181	1.71073	0.0377599	1.24019	0.0713263
transcript=PF3D7_0303200.1	0.813264	0.0771379	0.919806	0.366019	0.813742	0.0563482	0.767441	0.0920002
transcript=PF3D7_0303300.1	0.992687	0.933591	1.07776	0.423613	0.998824	0.992081	1.032	0.548074
transcript=PF3D7_0303500.1	1.16372	0.384225	0.944944	0.830514	0.961815	0.857106	1.20444	0.232194
transcript=PF3D7_0303700.1	0.983603	0.918684	1.01894	0.884251	0.884813	0.35587	1.05637	0.763803
transcript=PF3D7_0304200.1	0.564203	0.448259	0.974759	0.921317	0.570307	0.454664	0.760617	0.330741
transcript=PF3D7_0304400.1	0.846468	0.29972	1.20216	0.188462	0.853242	0.30326	0.856559	0.183391
transcript=PF3D7_0305200.1	1.11106	0.54908	1.21787	0.0408936	1.15724	0.312359	1.05198	0.811572
transcript=PF3D7_0305300.1	1.08619	0.2454	1.11431	0.278129	1.16215	0.198492	1.02671	0.792202
transcript=PF3D7_0305500.1	1.18375	0.0645294	1.06255	0.588971	1.16613	0.147435	0.912828	0.60164
transcript=PF3D7_0305600.1	1.0863	0.433675	1.06678	0.413388	1.13407	0.176496	0.980893	0.854051
transcript=PF3D7_0305700.1	1.01545	0.813532	0.944147	0.594771	1.05089	0.514376	1.09453	0.292534
transcript=PF3D7_0306100.1	1.08055	0.219565	1.0608	0.496287	1.12561	0.196708	1.04702	0.460858
transcript=PF3D7_0306200.1	1.05073	0.231122	0.861529	0.243999	1.08647	0.0451824	0.849148	0.156024
transcript=PF3D7_0306300.1	1.1513	0.147334	1.16947	0.0845619	1.0634	0.492564	1.04769	0.666736
transcript=PF3D7_0306800.1	1.09722	0.0201981	0.94107	0.399458	1.20782	0.000666064	0.986566	0.837465
transcript=PF3D7_0306900.1	0.94839	0.494468	1.00317	0.91333	0.890691	0.156571	0.891674	0.027446
transcript=PF3D7_0307100.1	0.919611	0.42144	0.993354	0.952153	0.974869	0.807243	0.935755	0.505496
transcript=PF3D7_0307200.1	0.836969	0.108973	0.853656	0.277581	0.893084	0.246538	0.973204	0.744828
transcript=PF3D7_0307700.1	1.32986	0.191417	1.29969	0.0364949	1.32495	0.219093	1.0665	0.663389
transcript=PF3D7_0308000.1	1.49325	0.307088	0.827998	0.208927	0.798658	0.644681	0.872902	0.325826
transcript=PF3D7_0308200.1	0.981338	0.890804	1.03676	0.643701	1.05275	0.532962	0.946799	0.580901
transcript=PF3D7_0308600.1	1.37248	0.123582	0.932147	0.725227	1.34995	0.181989	1.12025	0.473051
transcript=PF3D7_0309500.1	0.908674	0.152736	0.755865	0.183617	0.94974	0.173029	0.883985	0.134465
transcript=PF3D7_0309600.1	1.03101	0.806068	1.06513	0.441049	1.13379	0.0960591	1.00007	0.999238
transcript=PF3D7_0310300.1	0.835929	0.0612725	0.940505	0.814559	0.871711	0.384636	1.00537	0.976853
transcript=PF3D7_0310400.1	1.02246	0.608346	1.03819	0.230342	1.12835	0.224126	0.956359	0.210839
transcript=PF3D7_0310500.1	1.34789	0.358616	0.905561	0.699873	0.787512	0.337075	0.848617	0.566848
transcript=PF3D7_0310600.1;transcript=PF3D7_0310600.2	1.06301	0.838858	0.982571	0.939388	0.90727	0.717604	1.17524	0.52365
transcript=PF3D7_0310900.1	1.3324	0.141937	1.03498	0.802997	1.29029	0.171688	1.08881	0.480849
transcript=PF3D7_0312300.1	1.04179	0.796154	1.13912	0.376808	0.836267	0.463571	1.23213	0.197663
transcript=PF3D7_0312400.1	0.948498	0.702381	0.685216	0.271667	0.973293	0.839936	0.836146	0.543877
transcript=PF3D7_0312800.1	1.04473	0.651144	0.92159	0.40188	0.985596	0.910119	0.937996	0.281158
transcript=PF3D7_0313000.1	1.18644	0.106641	1.11425	0.642438	1.1914	0.202891	0.806022	0.405238
transcript=PF3D7_0314100.1	0.828214	0.595761	1.00684	0.937749	0.849598	0.621097	0.757652	0.186386
transcript=PF3D7_0315100.1	0.859639	0.00485168	0.93238	0.38478	0.799611	0.0749893	1.02181	0.666627
transcript=PF3D7_0315800.1	0.895557	0.796242	0.721038	0.238822	0.591886	0.165452	0.579645	0.052528
transcript=PF3D7_0316300.1;transcript=PF3D7_0316300.2	2.41499	0.457046	1.48648	0.17825	5.85589	0.00129728	1.53436	0.152603
transcript=PF3D7_0316500.1	0.767015	0.386151	1.0813	0.636785	0.813867	0.428035	1.25539	0.12745
transcript=PF3D7_0316600.1	0.978009	0.799822	1.06124	0.512739	0.880755	0.707467	1.06489	0.596968
transcript=PF3D7_0316800.1	1.14506	0.657433	0.714468	0.109666	0.946471	0.907396	0.776355	0.171526
transcript=PF3D7_0317000.1	0.809795	0.139924	1.15337	0.243469	0.844856	0.0406612	0.952553	0.220476
transcript=PF3D7_0317200.1	1.43338	0.227066	0.918591	0.609109	1.09018	0.862349	0.957589	0.821797
transcript=PF3D7_0317300.1	1.02725	0.790601	1.0665	0.424564	1.10736	0.365344	0.954895	0.542594
transcript=PF3D7_0317600.1	0.970744	0.731787	1.05995	0.510159	0.967147	0.661662	0.969954	0.691506
transcript=PF3D7_0317800.1	1.08149	0.196803	1.75531	0.0208808	1.11044	0.329474	1.60451	0.0433511
transcript=PF3D7_0318200.1	0.99455	0.947183	1.07186	0.23439	0.990605	0.89999	0.961178	0.525277
transcript=PF3D7_0319100.1	1.01639	0.980174	1.19712	0.345182	1.7144	0.30086	0.907404	0.329622
transcript=PF3D7_0319200.1	1.79899	0.0607731	0.731687	0.196196	1.62743	0.0552298	1.25058	0.193366
transcript=PF3D7_0319500.1	1.24068	0.111385	1.51815	0.0799762	1.03895	0.715291	1.10017	0.701056
transcript=PF3D7_0319600.1	1.06132	0.708882	0.922744	0.573374	0.874433	0.467305	1.06802	0.692637
transcript=PF3D7_0320000.1	1.37617	0.014468	1.01757	0.796809	1.30124	0.0171594	0.90322	0.316514
transcript=PF3D7_0320100.1	0.799476	0.273459	0.874646	0.0366712	0.946639	0.712449	0.911105	0.173022
transcript=PF3D7_0320300.1	1.02534	0.727849	0.974621	0.63223	1.23869	0.00565653	0.94688	0.180365
transcript=PF3D7_0320500.1	1.22812	0.0693762	1.11892	0.525949	1.29682	0.0309901	0.982908	0.937309
transcript=PF3D7_0320800.1	1.29245	0.107007	0.931351	0.396978	1.3018	0.0687613	0.882454	0.195393
transcript=PF3D7_0320900.1	1.03561	0.732974	0.902581	0.269132	1.03154	0.844301	1.04902	0.672233
transcript=PF3D7_0321900.1	0.991541	0.928411	1.75448	0.00456409	1.25071	0.483536	1.14183	0.4185
transcript=PF3D7_0322000.1	1.60045	0.0743421	0.747172	0.399372	1.13111	0.539098	1.34791	0.148514
transcript=PF3D7_0322100.1	0.9202	0.590442	0.719356	0.00706465	0.794899	0.158502	0.974775	0.870767
transcript=PF3D7_0322900.1	0.897169	0.177512	0.897765	0.061202	0.924137	0.114837	0.930146	0.235282
transcript=PF3D7_0323000.1	1.06901	0.200557	0.997059	0.975324	1.13106	0.16582	0.98096	0.869801
transcript=PF3D7_0323500.1	0.956469	0.38889	1.19872	0.286247	0.895681	0.561487	1.11604	0.491755
transcript=PF3D7_0323700.1	1.04948	0.705481	1.1442	0.481952	0.904478	0.657214	1.12682	0.354996
transcript=PF3D7_0323800.1	0.980687	0.929365	0.949787	0.805136	1.13806	0.0932436	0.90424	0.567005
transcript=PF3D7_0401800.1	0.975158	0.595187	0.988739	0.648421	1.02394	0.632792	0.976535	0.282451
transcript=PF3D7_0402000.1	0.522256	0.0880646	0.863653	0.582042	0.833162	0.729727	1.16838	0.420007
transcript=PF3D7_0402100.1	1.25586	0.0962702	1.05481	0.537384	1.33808	0.070726	1.0111	0.885289
transcript=PF3D7_0402400.1	1.03436	0.699782	1.05761	0.607888	1.0788	0.477219	0.808731	0.0529916
transcript=PF3D7_0403600.1	1.14689	0.391954	0.848508	0.401899	1.32329	0.102506	0.937082	0.513154
transcript=PF3D7_0404300.1	1.11794	0.381222	0.94451	0.299688	1.14288	0.164809	0.869034	0.139318
transcript=PF3D7_0404900.1	1.11976	0.713877	0.912584	0.680529	1.36142	0.176571	0.964253	0.866956
transcript=PF3D7_0405100.1	1.21719	0.165283	1.11269	0.323026	1.20917	0.118425	0.969523	0.750285
transcript=PF3D7_0405400.1	1.18573	0.169102	0.746162	0.117187	1.19887	0.00921565	1.02518	0.860591
transcript=PF3D7_0405600.1	1.00565	0.980654	0.898349	0.381545	1.13949	0.37149	0.812825	0.0878184
transcript=PF3D7_0405800.1	1.55473	0.269991	1.1677	0.0450186	1.2945	0.594829	1.11189	0.0451068
transcript=PF3D7_0405900.1	1.04086	0.640679	1.14175	0.181832	0.987796	0.809515	1.00925	0.930919
transcript=PF3D7_0406100.1	1.25806	0.225319	0.851857	0.0722098	1.20119	0.165057	0.894057	0.180098
transcript=PF3D7_0406200.1	1.4807	0.297099	0.714672	0.218374	1.6743	0.179133	1.00622	0.979088
transcript=PF3D7_0406400.1	0.921757	0.625465	0.98109	0.885138	0.998661	0.986325	0.948974	0.729279
transcript=PF3D7_0406700.1	1.13728	0.613324	2.0253	0.0365369	1.29165	0.255123	1.98131	0.378396
transcript=PF3D7_0407800.1	1.60024	0.16987	0.899427	0.764627	1.5591	0.324088	0.607917	0.205707
transcript=PF3D7_0409100.1	1.02311	0.843185	1.23448	0.0618458	1.04748	0.582666	1.06261	0.472161
transcript=PF3D7_0409400.1	0.948356	0.662297	1.25123	0.0660138	1.00998	0.868125	1.01829	0.867353
transcript=PF3D7_0409600.1	0.778951	0.250891	0.859557	0.414343	0.726553	0.20044	1.02222	0.885118
transcript=PF3D7_0410600.1	0.95003	0.856841	0.98931	0.930359	0.521492	0.064745	0.933212	0.318666
transcript=PF3D7_0410800.1	2.81708	0.153418	1.08468	0.531637	2.05885	0.43471	10.0429	0.392642
transcript=PF3D7_0411100.1	1.20483	0.0860095	1.12619	0.328428	1.21126	0.0858742	0.921024	0.631233
transcript=PF3D7_0412000.1	1.03488	0.636617	0.988012	0.886164	1.15322	0.276917	0.862286	0.191605
transcript=PF3D7_0413600.1	0.809019	0.142801	1.02508	0.407891	0.949133	0.619384	1.0094	0.860851
transcript=PF3D7_0413700.1	0.804293	0.12454	0.85578	0.00133852	0.782131	0.104464	0.966243	0.661562
transcript=PF3D7_0413900.1	0.913578	0.723893	1.30247	0.132758	0.751079	0.134246	1.38784	0.0266396
transcript=PF3D7_0414000.1	1.15751	0.21044	1.04452	0.783177	0.990887	0.935115	0.893299	0.55093
transcript=PF3D7_0415000.1	0.953347	0.784357	1.02483	0.870085	1.14506	0.183214	1.18635	0.117962
transcript=PF3D7_0415200.1	0.954796	0.949246	1.5705	0.169485	0.943027	0.910458	0.746079	0.628943
transcript=PF3D7_0415300.1	1.01821	0.939207	1.02816	0.953339	0.490128	0.0910805	1.82901	0.347502
transcript=PF3D7_0415500.1	1.18281	0.422128	1.22216	0.339625	1.07429	0.692419	1.2041	0.389399
transcript=PF3D7_0415900.1	0.852721	0.536776	0.719464	0.0638213	0.591435	0.191526	0.846263	0.418873
transcript=PF3D7_0416400.1	0.940535	0.763793	1.12456	0.699828	0.883083	0.66595	0.926002	0.813951
transcript=PF3D7_0416500.1	1.16544	0.732259	1.49926	0.350654	1.0477	0.710163	1.58006	0.311505
transcript=PF3D7_0416800.1	0.888569	0.139673	1.07222	0.394804	0.951972	0.676905	1.13853	0.13117
transcript=PF3D7_0417200.1	1.11334	0.137323	1.0657	0.168113	1.21531	0.0262195	1.01291	0.69158
transcript=PF3D7_0417500.1	1.05683	0.84348	0.916718	0.264655	0.922579	0.815403	0.878085	0.515154
transcript=PF3D7_0418200.1	0.725684	0.322407	0.742257	0.179388	0.429101	0.00645442	0.959935	0.693097
transcript=PF3D7_0418500.1	0.959774	0.554119	1.00879	0.924366	0.943288	0.541061	0.938162	0.375169
transcript=PF3D7_0419400.1	0.975111	0.902029	0.780499	0.511475	0.917016	0.714866	0.935349	0.850474
transcript=PF3D7_0419500.1	1.21432	0.118875	1.1274	0.668711	1.18725	0.15662	0.993746	0.985171
transcript=PF3D7_0419600.1	0.968935	0.74761	1.12253	0.243919	0.974013	0.737797	0.991453	0.934162
transcript=PF3D7_0420600.1	1.05458	0.867974	1.29839	0.137641	1.37347	0.00164481	1.30117	0.0795756
transcript=PF3D7_0422100.1	0.856284	0.129928	0.996488	0.957988	0.831207	0.0899621	1.0432	0.676173
transcript=PF3D7_0422400.1	1.17641	0.218162	0.825963	0.0723013	1.07091	0.35903	0.935814	0.550401
transcript=PF3D7_0422500.1	1.05092	0.686961	1.08328	0.361999	1.09196	0.208883	1.01362	0.88871
transcript=PF3D7_0423500.1	1.08729	0.351929	0.948097	0.462217	1.05453	0.657908	1.05649	0.684928
transcript=PF3D7_0423600.1	1.7486	0.106214	0.976923	0.853431	1.63198	0.15312	0.569861	0.0710523
transcript=PF3D7_0423700.1	1.14203	0.52151	1.21692	0.0305344	1.24598	0.124295	1.04293	0.681243
transcript=PF3D7_0424600.1	1.11682	0.739076	0.70936	0.262481	0.727215	0.275114	0.721404	0.289333
transcript=PF3D7_0500800.1	1.14439	0.0903817	1.17065	0.151868	1.16214	0.301413	0.893422	0.324708
transcript=PF3D7_0501000.1	1.17272	0.0631358	1.03066	0.701033	1.12337	0.180817	0.941491	0.407267
transcript=PF3D7_0501100.1;transcript=PF3D7_0501100.2	1.10351	0.289406	1.25578	0.047986	0.981829	0.896931	1.18343	0.396641
transcript=PF3D7_0501200.1	1.12781	0.0973162	1.06358	0.403721	1.13327	0.0152773	1.06565	0.212705
transcript=PF3D7_0501300.1	0.91954	0.425644	1.41977	0.00823593	1.00763	0.940901	1.25768	0.0223586
transcript=PF3D7_0501500.1	1.18462	0.493457	1.01086	0.968956	1.00386	0.987562	1.0135	0.945325
transcript=PF3D7_0501600.1	0.901051	0.568825	1.06562	0.830729	0.865826	0.550031	1.21456	0.425877
transcript=PF3D7_0501800.1	1.0021	0.985776	1.15828	0.253673	1.00096	0.984971	0.97001	0.809654
transcript=PF3D7_0503300.1	1.02606	0.708387	1.03408	0.607773	1.03608	0.462301	0.991921	0.900428
transcript=PF3D7_0503400.1	1.17701	0.31015	0.979953	0.908728	0.857361	0.485276	0.939227	0.646226
transcript=PF3D7_0503800.1	0.727789	0.025149	0.720945	0.057594	0.538839	0.0908529	0.881147	0.481185
transcript=PF3D7_0504800.1	1.62404	0.233955	0.839201	0.345027	1.43065	0.382744	0.911539	0.579762
transcript=PF3D7_0505000.1	0.555889	0.18147	0.511597	0.0544968	0.940628	0.880441	0.37669	0.0296698
transcript=PF3D7_0505100.1	0.950027	0.678811	1.06306	0.523444	1.01548	0.890276	0.967717	0.736859
transcript=PF3D7_0505200.1	0.984771	0.843519	1.02422	0.951238	0.961242	0.651879	0.632674	0.102771
transcript=PF3D7_0505500.1	0.919972	0.268757	0.956338	0.72586	0.954338	0.546644	1.04746	0.645643
transcript=PF3D7_0505700.1	1.03682	0.7321	0.999648	0.99742	1.02752	0.749929	0.832929	0.150024
transcript=PF3D7_0505800.1	1.10335	0.326946	1.0975	0.338916	1.06289	0.434414	0.930437	0.434792
transcript=PF3D7_0506100.1	1.04167	0.712911	1.2604	0.0590806	1.14683	0.164576	1.03044	0.637983
transcript=PF3D7_0506800.1	0.673855	0.476583	1.29141	0.355392	0.55819	0.367231	1.11418	0.709903
transcript=PF3D7_0506900.1	0.990255	0.955163	1.00127	0.993422	0.964307	0.810334	0.944289	0.510444
transcript=PF3D7_0507100.1	0.94463	0.388476	0.98176	0.796012	0.940759	0.292736	0.999654	0.996315
transcript=PF3D7_0507600.1	1.00925	0.953569	1.1074	0.35671	0.994187	0.966018	0.952129	0.653872
transcript=PF3D7_0507700.1	1.0373	0.783283	0.862799	0.226995	0.986854	0.893136	0.998563	0.989253
transcript=PF3D7_0507800.1	1.36743	0.0167589	1.06298	0.380442	1.36787	0.0369977	1.12023	0.142997
transcript=PF3D7_0508000.1	0.951366	0.691902	1.03325	0.640319	0.95858	0.752122	1.09447	0.385767
transcript=PF3D7_0508800.1	0.884546	0.317129	0.894106	0.156832	0.907068	0.4588	0.944082	0.419947
transcript=PF3D7_0509400.1	2.28279	0.0697392	1.28679	0.00550323	2.44063	0.0519318	1.25733	0.0529258
transcript=PF3D7_0510100.1	0.962014	0.641189	1.20011	0.185522	0.985271	0.842748	1.09686	0.392289
transcript=PF3D7_0511000.1	1.08944	0.499703	1.07007	0.454455	1.1025	0.244408	0.971098	0.704597
transcript=PF3D7_0511200.1	1.10598	0.64687	1.25193	0.472807	0.889028	0.744589	0.999358	0.998069
transcript=PF3D7_0511500.1	1.05072	0.643012	1.06996	0.390463	1.0142	0.91474	0.95894	0.627092
transcript=PF3D7_0511800.1	0.960015	0.185374	0.953556	0.512302	0.953781	0.266178	0.96316	0.563999
transcript=PF3D7_0512000.1	1.32161	0.00246528	1.12785	0.146549	1.31343	0.0549855	1.07324	0.475116
transcript=PF3D7_0512200.1	0.869205	0.349583	0.950172	0.632053	0.848854	0.0133224	0.998974	0.988986
transcript=PF3D7_0512300.1	0.76754	0.175986	1.32773	0.40108	0.946464	0.793231	1.11121	0.773356
transcript=PF3D7_0512600.1	0.984482	0.571914	0.973745	0.598542	0.947199	0.0235849	1.03854	0.560142
transcript=PF3D7_0512700.1	0.85858	0.344707	1.28498	0.287208	0.905966	0.215071	1.54789	0.0342326
transcript=PF3D7_0513300.1	0.914068	0.480774	0.917783	0.195233	0.883745	0.350386	0.99884	0.980242
transcript=PF3D7_0513600.1	0.935058	0.347108	0.980213	0.757645	0.896145	0.0788924	1.14404	0.17511
transcript=PF3D7_0513800.1	1.11912	0.219226	0.835633	0.06923	0.978052	0.786533	0.898776	0.145901
transcript=PF3D7_0516200.1	1.04817	0.385317	1.1239	0.182653	1.07465	0.446136	1.0377	0.677637
transcript=PF3D7_0516400.1	1.7785	0.287322	1.21741	0.22092	1.23684	0.059578	1.15726	0.562423
transcript=PF3D7_0516800.1	1.12946	0.756805	1.36238	0.319617	0.665517	0.196003	1.61134	0.122114
transcript=PF3D7_0516900.1	1.11979	0.684795	1.18925	0.523279	0.895879	0.666045	1.0884	0.456982
transcript=PF3D7_0517000.1	0.770273	0.0624199	0.810899	0.0724843	0.71166	0.147525	0.902352	0.198907
transcript=PF3D7_0517300.1	1.05629	0.622098	1.11881	0.149949	1.03203	0.755533	1.03271	0.631813
transcript=PF3D7_0517400.1	0.932633	0.522817	1.0818	0.268507	1.00302	0.974892	1.07476	0.173546
transcript=PF3D7_0517700.1	1.04481	0.795574	0.794441	0.0916455	1.03261	0.827196	0.980269	0.802908
transcript=PF3D7_0518200.1	1.03747	0.808019	0.959431	0.799821	0.860878	0.530243	1.07141	0.651396
transcript=PF3D7_0518300.1	0.85559	0.00692969	0.940439	0.236093	0.9147	0.00966016	0.961482	0.429341
transcript=PF3D7_0519400.1	0.864453	0.584842	0.825467	0.231045	0.737357	0.302034	1.03409	0.796983
transcript=PF3D7_0519600.1	0.805206	0.19396	0.70422	0.271979	0.858722	0.322476	0.786265	0.212448
transcript=PF3D7_0519700.1	1.02523	0.920071	1.15152	0.110364	1.27484	0.111711	1.05575	0.51414
transcript=PF3D7_0519800.1	0.701984	0.308467	1.12783	0.132443	0.91111	0.747645	0.825864	0.040164
transcript=PF3D7_0520000.1	0.983072	0.898627	0.860684	0.127944	0.847954	0.364149	0.93488	0.376722
transcript=PF3D7_0520200.1	1.16824	0.515012	1.16651	0.566934	0.912765	0.6996	0.981797	0.949001
transcript=PF3D7_0520400.1	1.03582	0.766586	0.950332	0.52593	0.965747	0.821139	0.931186	0.362275
transcript=PF3D7_0520600.1	0.847178	0.184249	1.00968	0.892927	0.922919	0.215298	0.877977	0.0915054
transcript=PF3D7_0520800.1	1.12746	0.227201	0.894938	0.606427	1.18637	0.307341	0.78576	0.333094
transcript=PF3D7_0520900.1	0.980568	0.558157	0.972867	0.583129	0.936053	0.241266	1.01777	0.752424
transcript=PF3D7_0521700.1	1.16309	0.169638	1.08094	0.729572	1.19029	0.208918	1.1199	0.59765
transcript=PF3D7_0522200.1	1.15871	0.215606	0.946706	0.635382	1.1557	0.382631	1.2536	0.546933
transcript=PF3D7_0523000.1	1.00448	0.967091	1.44484	0.0398038	0.989425	0.951346	1.23832	0.123764
transcript=PF3D7_0524000.1	1.08298	0.229527	0.960857	0.675441	0.980248	0.609615	0.998591	0.988213
transcript=PF3D7_0524400.1	1.11415	0.453394	0.919896	0.261243	0.984642	0.863702	1.17491	0.292308
transcript=PF3D7_0524500.1	0.949852	0.545962	1.06519	0.424128	1.02535	0.776753	0.972405	0.745694
transcript=PF3D7_0524600.1	0.97842	0.846334	1.08728	0.877911	0.943152	0.737214	0.880244	0.711282
transcript=PF3D7_0525100.1	0.98738	0.77134	0.975659	0.667707	0.901324	0.0684734	1.00281	0.964942
transcript=PF3D7_0525800.1	0.965059	0.8048	1.1843	0.153806	1.05389	0.722752	1.09259	0.271122
transcript=PF3D7_0526200.1;transcript=PF3D7_0526200.2	1.00261	0.98534	1.07461	0.380378	0.831247	0.439319	1.13386	0.428504
transcript=PF3D7_0526500.1	0.901399	0.639337	1.02991	0.739531	0.871149	0.611262	1.18164	0.174976
transcript=PF3D7_0527000.1	1.04292	0.521547	1.06846	0.104444	0.960029	0.315364	1.02068	0.384874
transcript=PF3D7_0527100.1	0.934625	0.423238	0.939552	0.704247	0.893464	0.0880209	1.04653	0.671415
transcript=PF3D7_0527200.1	1.06342	0.28127	0.818684	0.0908089	0.933028	0.22979	0.940844	0.572448
transcript=PF3D7_0527500.1	0.99817	0.98183	1.02543	0.74721	1.03709	0.694224	0.945376	0.470669
transcript=PF3D7_0527600.1	1.41817	0.220497	1.51627	0.398353	1.24549	0.589969	0.961372	0.942857
transcript=PF3D7_0528000.1	1.35062	0.0683424	1.00647	0.961657	1.35194	0.12009	1.11274	0.299614
transcript=PF3D7_0528100.1	1.29251	0.142157	0.804291	0.0282862	1.14982	0.536376	0.899221	0.23171
transcript=PF3D7_0528200.1	1.37262	0.0217602	0.987623	0.848685	1.29954	0.0494725	1.01846	0.692986
transcript=PF3D7_0528700.1	0.384469	0.000279399	1.19062	0.690961	0.764344	0.358245	0.933215	0.895993
transcript=PF3D7_0528800.1	0.673487	0.0790827	1.00911	0.918563	0.829003	0.294895	0.923523	0.392744
transcript=PF3D7_0529400.1	1.12623	0.695779	0.964145	0.690569	1.15174	0.59149	1.00808	0.910142
transcript=PF3D7_0529800.1	1.2233	0.195055	1.20683	0.427819	0.814973	0.23872	1.08899	0.747353
transcript=PF3D7_0532100.1	0.999594	0.995357	1.10857	0.265514	1.18121	0.165021	0.964294	0.721853
transcript=PF3D7_0532300.1	1.02385	0.882047	1.05986	0.446535	0.995146	0.971933	1.01849	0.795086
transcript=PF3D7_0532400.1	1.03626	0.74515	1.29734	0.001916	1.22507	0.0797668	1.22541	0.00796556
transcript=PF3D7_0601900.1	1.013	0.951944	1.17673	0.373168	0.965013	0.87869	1.05597	0.82318
transcript=PF3D7_0602100.1	1.06987	0.510689	1.38994	0.3121	1.59501	0.397914	0.953887	0.900682
transcript=PF3D7_0602200.1	1.31135	0.109815	0.863058	0.320166	1.29897	0.115359	0.891869	0.432574
transcript=PF3D7_0602400.1	0.960192	0.893345	1.05532	0.804325	0.828832	0.443472	1.05382	0.78773
transcript=PF3D7_0603400.1	0.889013	0.255086	1.03624	0.776079	0.827979	0.159158	1.01952	0.881654
transcript=PF3D7_0604100.1	1.32265	0.330615	1.16295	0.444179	1.21324	0.125345	0.998021	0.989138
transcript=PF3D7_1026000.1	1.72081	0.000239196	2.16861	0.000194788	1.99302	0.000513232	2.21396	0.00524995
transcript=PF3D7_0604500.1	1.0958	0.335933	0.982374	0.889786	1.01522	0.880052	0.958748	0.759366
transcript=PF3D7_0605100.1	0.900684	0.183525	1.07413	0.425545	0.944957	0.381666	1.06054	0.24229
transcript=PF3D7_0606000.1	0.93527	0.651241	0.987514	0.89952	0.969278	0.814791	0.883153	0.217791
transcript=PF3D7_0606600.1	1.30095	0.022052	1.09949	0.314106	1.24598	0.0459139	1.01754	0.852574
transcript=PF3D7_0606700.1	1.10648	0.190077	0.994148	0.934593	1.12921	0.210308	0.963785	0.623458
transcript=PF3D7_0606800.1	1.15902	0.104805	1.13888	0.319322	0.98786	0.922336	1.19639	0.105321
transcript=PF3D7_0607000.1	1.17363	0.113128	1.06967	0.286375	1.19686	0.101344	0.941815	0.231546
transcript=PF3D7_0608500.1	0.853472	0.0284105	0.927836	0.139188	1.00075	0.987021	0.962247	0.389333
transcript=PF3D7_0608700.1	1.07447	0.60385	0.915098	0.44148	0.964305	0.784132	1.00877	0.943605
transcript=PF3D7_0608800.1	1.02312	0.790373	0.973725	0.577406	0.913992	0.220219	1.0137	0.691384
transcript=PF3D7_0609000.1	1.13334	0.574388	1.05396	0.690118	1.04942	0.554451	0.98846	0.927189
transcript=PF3D7_0610100.1	0.817705	0.0886326	1.45608	0.183097	0.867357	0.219199	1.32323	0.315467
transcript=PF3D7_0610200.1	1.04243	0.789885	1.13365	0.0212485	0.980057	0.876776	1.08648	0.264248
transcript=PF3D7_0610400.1	0.962023	0.664456	1.07828	0.011351	1.03395	0.465644	1.05347	0.184545
transcript=PF3D7_0610500.1	0.979525	0.856348	1.24474	0.232052	1.25704	0.128561	0.875374	0.562104
transcript=PF3D7_0610700.1	0.817863	0.0759229	1.06661	0.502639	1.0173	0.948291	1.15137	0.256368
transcript=PF3D7_0610800.1	0.892719	0.357736	0.909837	0.330573	0.914666	0.49369	1.03595	0.426361
transcript=PF3D7_0610900.1	0.866662	0.205068	0.992191	0.9036	1.02838	0.682663	0.873402	0.0575254
transcript=PF3D7_0611400.1	1.07162	0.151155	0.869827	0.03073	1.10744	0.137328	0.932059	0.255644
transcript=PF3D7_0611800.1	1.03637	0.684672	0.670199	0.259128	0.918261	0.682633	0.860431	0.55152
transcript=PF3D7_0611900.1	1.15755	0.243114	0.563904	0.0278011	1.06993	0.537332	0.618233	0.0479668
transcript=PF3D7_0612100.1	1.22661	0.505279	0.896059	0.245993	1.18949	0.54431	0.984436	0.831777
transcript=PF3D7_0612200.1	1.40424	0.0136206	2.12357	0.189135	1.12573	0.323086	0.993772	0.984186
transcript=PF3D7_0612700.1	1.09175	0.202947	0.951739	0.627732	1.02358	0.862043	0.879195	0.129909
transcript=PF3D7_0612900.1	1.05684	0.722103	1.04447	0.540971	1.0592	0.511622	0.988033	0.813844
transcript=PF3D7_0613300.1	0.746311	0.173415	0.994576	0.955648	1.04523	0.878743	0.887067	0.452639
transcript=PF3D7_0613800.1	1.03178	0.728869	1.09547	0.303249	0.993047	0.926484	0.930888	0.413222
transcript=PF3D7_0614300.1	1.01179	0.950386	1.18867	0.384668	0.877191	0.458472	1.05525	0.676489
transcript=PF3D7_0614400.1	1.096	0.673256	0.79172	0.062451	1.17627	0.322406	0.910894	0.709512
transcript=PF3D7_0614500.1	1.03717	0.477495	0.994908	0.89536	1.0481	0.229919	0.928379	0.112807
transcript=PF3D7_0615000.1	1.1909	0.532459	1.13912	0.709458	1.15309	0.638424	0.685551	0.336313
transcript=PF3D7_0615400.1	1.13966	0.124407	1.04301	0.746093	1.20049	0.0560603	0.999381	0.995217
transcript=PF3D7_0615600.1	1.20423	0.12293	1.44818	0.190343	1.59978	0.019656	1.02038	0.966014
transcript=PF3D7_0615700.1	1.15121	0.44063	0.906645	0.45707	1.22805	0.256406	0.658907	0.0543915
transcript=PF3D7_0615800.1	1.00005	0.999788	0.793598	0.235437	1.39501	0.213009	0.752493	0.164013
transcript=PF3D7_0616200.1	1.1352	0.184125	1.06904	0.361154	1.08241	0.568855	1.0705	0.259881
transcript=PF3D7_0616300.1	0.875411	0.429238	0.699415	0.199197	0.794976	0.206204	0.771105	0.23998
transcript=PF3D7_0617100.1	0.922854	0.483077	0.943296	0.600803	0.889815	0.318927	0.9584	0.365568
transcript=PF3D7_0617200.1	1.20518	0.177985	0.998757	0.99125	1.23291	0.188191	0.999257	0.993635
transcript=PF3D7_0617800.1	0.952244	0.912396	0.763415	0.385862	0.614628	0.303968	0.960729	0.924504
transcript=PF3D7_0617900.1	0.901145	0.344106	0.962652	0.808916	0.942608	0.503797	0.877238	0.241842
transcript=PF3D7_0618000.1	0.984708	0.917402	1.08722	0.297916	0.965479	0.772084	1.04319	0.670905
transcript=PF3D7_0618200.1	1.16494	0.0521068	1.1828	0.318035	1.13511	0.0854685	1.22691	0.197734
transcript=PF3D7_0618300.1	1.18196	0.225759	0.954696	0.698413	1.2212	0.0896187	0.900753	0.349093
transcript=PF3D7_0618700.1	0.832732	0.342007	1.09538	0.341338	0.835563	0.33397	1.02742	0.741975
transcript=PF3D7_0619400.1	1.29117	0.160472	1.11333	0.43125	1.11338	0.466095	1.12229	0.28691
transcript=PF3D7_0619500.1	0.930271	0.700303	1.01547	0.897301	0.753011	0.152768	0.683697	0.33428
transcript=PF3D7_0620500.1	1.39584	0.00525629	0.770381	0.362793	1.24489	0.178962	0.871312	0.589443
transcript=PF3D7_0621200.1	1.06704	0.0923248	1.03914	0.243761	1.10779	0.130031	0.976475	0.602193
transcript=PF3D7_0621800.1	1.09018	0.561324	0.980433	0.862826	1.08883	0.381009	0.953066	0.605351
transcript=PF3D7_0621900.1	1.2369	0.320887	0.855004	0.446318	1.23788	0.197629	0.731166	0.145415
transcript=PF3D7_0622200.1	1.45459	0.0498527	0.960964	0.898416	1.06808	0.777899	0.922468	0.773954
transcript=PF3D7_0622800.1	1.07967	0.363761	1.1068	0.267429	1.07974	0.306175	0.968387	0.70986
transcript=PF3D7_0623100.1	1.02363	0.861092	0.954586	0.637495	1.02831	0.763981	0.940032	0.485622
transcript=PF3D7_0623500.1	1.0748	0.621091	1.22616	0.219926	0.956936	0.801964	0.952983	0.703006
transcript=PF3D7_0623600.1	1.40012	0.196756	1.00214	0.989073	1.22568	0.410559	0.893286	0.393117
transcript=PF3D7_0624000.1	0.971323	0.761105	0.885943	0.149099	0.930338	0.499105	0.982385	0.577127
transcript=PF3D7_0624600.1	1.02571	0.772494	1.07098	0.389142	0.976688	0.81958	0.981822	0.787969
transcript=PF3D7_0625400.1	0.930201	0.859186	1.76771	0.0587178	0.63295	0.305376	1.56188	0.130967
transcript=PF3D7_0626000.1	1.0344	0.479174	1.04543	0.178614	1.05501	0.471398	0.975843	0.546028
transcript=PF3D7_0626700.1	1.05583	0.0945802	0.87085	0.0231598	1.03523	0.417998	0.861788	0.0141034
transcript=PF3D7_0626800.1	1.01308	0.617352	1.00742	0.889175	1.00915	0.7841	1.14175	0.0526082
transcript=PF3D7_0627300.1	1.18586	0.0712802	0.984985	0.935657	1.14105	0.106483	0.997282	0.967927
transcript=PF3D7_0627500.1	1.06382	0.38374	0.98086	0.72011	1.05635	0.563541	1.01979	0.66095
transcript=PF3D7_0627700.1	0.958437	0.496073	0.947299	0.619692	0.828277	0.245225	1.06934	0.396948
transcript=PF3D7_0627800.1	1.00614	0.958264	0.85363	0.10141	1.13119	0.182619	0.880128	0.154855
transcript=PF3D7_0628200.1	0.942191	0.65842	1.15849	0.382807	0.829188	0.416972	1.00089	0.994439
transcript=PF3D7_0629100.1	0.793951	0.505054	0.98202	0.924377	0.378053	0.0432469	1.01594	0.936346
transcript=PF3D7_0629200.1	1.11868	0.117178	0.935472	0.110499	1.15047	0.223527	1.02511	0.546249
transcript=PF3D7_0629700.1	1.32318	0.140926	0.999325	0.993484	1.67584	0.0622646	1.03541	0.758712
transcript=PF3D7_0702300.1	0.963967	0.92556	1.05705	0.782715	1.09828	0.674863	1.04017	0.809253
transcript=PF3D7_0702400.1	0.582317	0.00944811	0.8768	0.32448	0.71003	0.0628474	0.878442	0.306409
transcript=PF3D7_0702500.1	1.03435	0.79502	0.958439	0.732532	1.04394	0.61324	0.921777	0.54278
transcript=PF3D7_0702900.1	1.45941	0.0120718	1.08118	0.3956	1.45381	0.0137626	1.08065	0.432394
transcript=PF3D7_0703200.1	1.41298	0.169548	0.961815	0.646636	1.52892	0.0862303	1.04927	0.630456
transcript=PF3D7_0703500.1	1.07575	0.269993	0.988954	0.890922	1.01645	0.748432	1.05366	0.462163
transcript=PF3D7_0703700.1	1.72196	0.000641596	0.737095	0.517161	1.43534	0.0539664	0.942523	0.855933
transcript=PF3D7_0704200.1	0.969315	0.90518	0.532773	0.00941418	0.865842	0.629362	0.767432	0.210948
transcript=PF3D7_0704300.1	0.980732	0.921564	1.05133	0.765392	1.08243	0.385394	0.771617	0.108919
transcript=PF3D7_0704400.1	1.20378	0.034242	1.13406	0.495163	0.937008	0.534804	1.05251	0.726862
transcript=PF3D7_0704600.1	1.36404	0.0477302	0.984049	0.861054	1.33478	0.0827307	0.92884	0.337159
transcript=PF3D7_0705400.1	0.950378	0.360843	1.07192	0.380378	0.937112	0.287561	1.03549	0.609476
transcript=PF3D7_0705500.1	0.670775	0.208467	1.16285	0.0160108	0.663155	0.18184	1.10743	0.590267
transcript=PF3D7_0705700.1	0.912242	0.52252	1.32648	0.00471121	0.959788	0.784993	1.29899	0.00703491
transcript=PF3D7_0706000.1	1.00867	0.895373	0.987115	0.822315	1.3368	0.512471	1.01052	0.82509
transcript=PF3D7_0706500.1	1.0642	0.427234	0.964644	0.768361	0.987711	0.855915	0.820555	0.0120087
transcript=PF3D7_0707200.1	1.04461	0.717962	1.18807	0.0332266	1.21998	0.140542	1.03262	0.634335
transcript=PF3D7_0707300.1	0.989171	0.920961	0.939744	0.694006	0.994209	0.961997	0.877677	0.300468
transcript=PF3D7_0707600.1	0.862797	0.596065	1.47459	0.421189	0.728651	0.387077	1.66467	0.20984
transcript=PF3D7_0708300.1	0.900217	0.695069	1.14556	0.425774	1.09053	0.682013	1.24264	0.0742719
transcript=PF3D7_0708400.1	0.969782	0.67545	0.959794	0.205617	0.944736	0.367394	0.999774	0.99403
transcript=PF3D7_0708800.1	0.994013	0.961837	0.993864	0.902717	1.0048	0.934363	0.974468	0.568948
transcript=PF3D7_0709300.1	1.07888	0.882775	1.60418	0.446949	0.664946	0.317268	1.6644	0.390054
transcript=PF3D7_0709400.1	1.1962	0.162187	1.08476	0.36933	1.24974	0.0504991	0.987003	0.869142
transcript=PF3D7_0709500.1	0.963972	0.648504	1.12162	0.176104	0.993494	0.93163	0.853851	0.367448
transcript=PF3D7_0709700.1	2.23386	0.0179121	0.879378	0.233252	1.83534	0.0885132	0.903244	0.530206
transcript=PF3D7_0710200.1	1.25073	0.224333	1.01998	0.863703	1.28164	0.010545	0.870876	0.150702
transcript=PF3D7_0710600.1	0.894816	0.0534356	0.967323	0.602312	0.865863	0.0820973	0.973513	0.673067
transcript=PF3D7_0710700.1	0.778791	0.555235	1.43625	0.374039	0.499254	0.221061	1.40083	0.342997
transcript=PF3D7_0711000.1	1.1848	0.505593	1.13261	0.336599	1.01132	0.94568	0.8277	0.0573265
transcript=PF3D7_0711300.1	1.34649	0.0349253	1.94258	0.173691	1.21063	0.445581	0.743237	0.71279
transcript=PF3D7_0711500.1	1.00283	0.948278	1.01572	0.816676	0.991781	0.869708	1.03095	0.671628
transcript=PF3D7_0714000.1	1.06575	0.576675	0.824549	0.0997754	0.793037	0.0869292	0.908752	0.245403
transcript=PF3D7_0714200.1	1.13753	0.48956	1.31013	0.0116321	1.05509	0.772301	1.06796	0.251642
transcript=PF3D7_0714500.1	0.989827	0.95424	1.1822	0.0723435	0.878944	0.459728	1.12783	0.258686
transcript=PF3D7_0715200.1	1.05781	0.805885	1.06088	0.56547	1.05585	0.760271	0.728748	0.0475105
transcript=PF3D7_0715900.1	1.0612	0.748993	1.03643	0.735853	1.16587	0.182786	0.95612	0.559152
transcript=PF3D7_0716000.1	1.05679	0.892345	1.06757	0.423069	1.11724	0.778733	1.06151	0.526695
transcript=PF3D7_0716300.1	1.13488	0.275332	1.0719	0.488034	1.17357	0.162941	0.936589	0.51961
transcript=PF3D7_0716800.1	1.10429	0.00507562	0.962382	0.11556	1.08996	0.0974128	0.989377	0.690793
transcript=PF3D7_0717700.1	1.075	0.62659	0.987465	0.906575	1.07938	0.66858	1.02587	0.737656
transcript=PF3D7_0718500.1	1.02127	0.935921	1.0105	0.920851	0.998017	0.991747	0.977384	0.806591
transcript=PF3D7_0719000.1	1.06435	0.857277	0.559549	0.379671	1.48932	0.138206	1.56408	0.489846
transcript=PF3D7_0719600.1	0.853557	0.390985	0.802522	0.0991908	0.746069	0.171693	0.930539	0.452576
transcript=PF3D7_0719700.1	0.950145	0.602835	0.580454	0.0669344	0.901633	0.246211	1.06832	0.692384
transcript=PF3D7_0720400.1	1.39096	0.0707438	0.847945	0.178782	1.17062	0.57019	0.901647	0.641077
transcript=PF3D7_0720800.1	0.640607	0.111147	1.27008	0.532549	0.919349	0.574689	0.72845	0.491916
transcript=PF3D7_0721100.1	1.07996	0.473661	0.960077	0.58729	1.08875	0.307405	0.973444	0.540713
transcript=PF3D7_0721400.1	0.77528	0.253573	1.10492	0.101559	0.914302	0.326926	1.08583	0.16325
transcript=PF3D7_0721600.1	0.897623	0.440167	0.861236	0.317292	0.852206	0.416934	1.02879	0.80324
transcript=PF3D7_0722200.1	0.821713	0.359635	1.02542	0.940566	0.736116	0.368816	0.912743	0.772992
transcript=PF3D7_0722400.1	1.03365	0.684615	1.05368	0.329004	1.01288	0.856816	1.02151	0.495828
transcript=PF3D7_0722500.1	1.20639	0.390589	1.35981	0.229977	1.49184	0.272762	2.21129	0.150705
transcript=PF3D7_0723400.1	1.07102	0.484071	0.895707	0.410713	1.05362	0.526923	0.990989	0.94246
transcript=PF3D7_0723800.1	1.23382	0.219554	0.949907	0.405451	1.06235	0.643271	0.897962	0.186205
transcript=PF3D7_0723900.1	0.995354	0.993674	5.79012	0.175212	0.89609	0.855578	3.66345	0.174176
transcript=PF3D7_0724100.1	1.24284	0.0279509	1.02468	0.905949	1.16725	0.124914	1.10748	0.50336
transcript=PF3D7_0724600.1	1.44704	0.215679	0.842839	0.290737	1.37571	0.284542	0.830956	0.239726
transcript=PF3D7_0726300.1	0.836481	0.331131	1.19319	0.608618	1.1126	0.44955	0.844058	0.670729
transcript=PF3D7_0726400.1	0.838033	0.545187	0.790378	0.606688	0.911862	0.497571	0.474937	0.0903156
transcript=PF3D7_0726500.1	0.956134	0.840832	1.0194	0.759421	1.05824	0.66624	1.06798	0.353504
transcript=PF3D7_0727400.1	0.912996	0.11964	1.00657	0.72117	0.946451	0.217921	0.960688	0.240087
transcript=PF3D7_0728000.1	0.992853	0.886905	0.970873	0.549491	1.00291	0.965189	0.971465	0.67041
transcript=PF3D7_0728600.1	0.864262	0.612217	1.15778	0.643585	1.00807	0.976548	1.02737	0.931272
transcript=PF3D7_0729000.1	1.17383	0.15155	1.26519	0.698362	1.39127	0.0399369	0.615276	0.458098
transcript=PF3D7_0729100.1	1.06309	0.59585	1.03036	0.640503	1.11491	0.469557	0.94232	0.453908
transcript=PF3D7_0729200.1	0.982306	0.907119	0.989104	0.88289	0.996683	0.983841	0.971866	0.702397
transcript=PF3D7_0729300.1	0.926168	0.698143	1.00198	0.99357	0.843278	0.279822	0.996688	0.988576
transcript=PF3D7_0729400.1	0.672193	0.347779	0.866846	0.0458224	0.811296	0.576793	0.879364	0.0406979
transcript=PF3D7_0730400.1	1.22788	0.506321	1.00552	0.950301	0.999681	0.99923	1.10019	0.0229392
transcript=PF3D7_0730500.1	1.06869	0.375637	0.892391	0.628014	1.26892	0.296949	0.853825	0.302682
transcript=PF3D7_0730800.1;transcript=PF3D7_0730800.2	1.22242	0.470158	0.991505	0.980226	1.24008	0.490922	0.91992	0.780057
transcript=PF3D7_0730900.1	1.06983	0.473218	1.10208	0.254599	1.07838	0.346369	0.979788	0.805989
transcript=PF3D7_0731300.1	0.707048	0.0346137	0.960722	0.380083	0.657158	0.0248911	0.96758	0.562088
transcript=PF3D7_0731500.1	0.874215	0.275331	1.03224	0.602082	1.00405	0.972809	0.950516	0.469759
transcript=PF3D7_0731600.1	0.729324	0.14857	0.938656	0.738322	0.71067	0.186642	1.0547	0.658057
transcript=PF3D7_0801000.1	1.04147	0.735076	0.737613	0.106305	1.1072	0.332559	0.783643	0.160073
transcript=PF3D7_0801700.1	0.747963	0.423772	1.30686	0.122504	0.917398	0.679162	1.41968	0.0626668
transcript=PF3D7_0801800.1	1.08341	0.306643	0.999428	0.995096	1.09319	0.244168	0.982273	0.83725
transcript=PF3D7_0802000.1	0.874556	0.461949	0.843883	0.0701877	0.889213	0.534111	0.8507	0.0949203
transcript=PF3D7_0802200.1	1.00785	0.900492	1.02551	0.732187	1.04037	0.664559	0.970271	0.67813
transcript=PF3D7_0802800.1	0.944942	0.459333	0.985691	0.973104	0.873703	0.195606	0.942381	0.872598
transcript=PF3D7_0803100.1	1.97825	0.193622	4.92923	0.0365111	2.24242	0.214309	4.47709	0.00350568
transcript=PF3D7_0803200.1	1.11606	0.578431	1.37316	0.0800672	0.942311	0.701469	1.25304	0.100768
transcript=PF3D7_0803700.1	1.05406	0.746341	0.878853	0.124026	1.08894	0.329068	0.895145	0.119809
transcript=PF3D7_0803800.1	0.786457	0.179582	1.02536	0.605793	0.749217	0.123441	1.03004	0.575359
transcript=PF3D7_0804500.1	1.13193	0.199422	1.20997	0.36096	1.06852	0.187087	1.05805	0.852466
transcript=PF3D7_0804900.1	0.907016	0.602931	1.04813	0.604897	0.856258	0.502275	0.870506	0.17696
transcript=PF3D7_0805700.1	1.03944	0.81083	1.07252	0.310453	1.10688	0.285537	1.0012	0.985673
transcript=PF3D7_0806500.1	0.855706	0.511055	0.92737	0.638098	1.51338	0.0243592	0.965877	0.757837
transcript=PF3D7_0807300.1	1.03478	0.587487	0.935082	0.195735	1.04376	0.618848	0.967372	0.5031
transcript=PF3D7_0807500.1	0.952375	0.304343	1.07592	0.0583485	1.03733	0.376388	1.03262	0.405195
transcript=PF3D7_0807600.1	1.04421	0.358082	0.997731	0.945757	1.08639	0.108063	0.982298	0.644193
transcript=PF3D7_0807800.1	1.05589	0.712065	0.862738	0.338362	1.06658	0.343948	0.84075	0.116606
transcript=PF3D7_0807900.1	0.876788	0.287649	1.05675	0.684461	0.911431	0.479169	1.09708	0.364636
transcript=PF3D7_0808400.1	1.08585	0.0744429	0.979152	0.748681	1.05507	0.431081	1.00109	0.987089
transcript=PF3D7_0810000.1	1.12379	0.643621	1.27035	0.512949	0.833755	0.418609	1.59715	0.224732
transcript=PF3D7_0810300.1	1.21465	0.367207	0.979754	0.914623	1.06054	0.774879	0.94906	0.728217
transcript=PF3D7_0810500.1	1.02797	0.72097	1.06369	0.436636	0.947245	0.345123	1.02248	0.694342
transcript=PF3D7_0810600.1	0.922538	0.635288	0.893151	0.493912	0.799993	0.173889	1.05161	0.707735
transcript=PF3D7_0810800.1	1.4715	0.00672191	0.871326	0.249275	1.45514	0.00151044	1.00951	0.912379
transcript=PF3D7_0811400.1	0.875608	0.122767	1.12845	0.0515874	1.0381	0.678693	1.17315	0.0201234
transcript=PF3D7_0811500.1	1.69547	0.107289	1.30449	0.33678	1.02273	0.856778	1.00673	0.896451
transcript=PF3D7_0811600.1	0.527589	0.0366485	0.830441	0.329666	0.485703	0.0338869	0.969876	0.816897
transcript=PF3D7_0812100.1	1.15814	0.483009	0.513389	0.105801	1.13889	0.28194	0.644029	0.269297
transcript=PF3D7_0812400.1	1.02419	0.824736	0.918161	0.163645	1.14586	0.396471	0.989788	0.875898
transcript=PF3D7_0812500.1	1.04227	0.697033	1.01018	0.928885	1.09328	0.260245	0.909767	0.38637
transcript=PF3D7_0812700.1	1.08256	0.558436	0.966699	0.747507	1.12439	0.323029	1.03356	0.775429
transcript=PF3D7_0813000.1	1.19299	0.104999	1.00053	0.99681	1.27699	0.0968965	0.910851	0.342421
transcript=PF3D7_0813300.1	1.21201	0.0666318	1.09698	0.273241	1.20119	0.14756	0.995684	0.949504
transcript=PF3D7_0813400.1	1.05645	0.465726	1.00626	0.915237	1.04008	0.561614	0.968137	0.540649
transcript=PF3D7_0813600.1	1.13215	0.00580096	0.916519	0.585502	1.05442	0.215779	1.12681	0.167535
transcript=PF3D7_0813900.1	1.04315	0.809841	1.27852	0.0863391	0.877584	0.52378	1.18741	0.227561
transcript=PF3D7_0814000.1	1.18008	0.00383256	1.02256	0.707878	1.11479	0.0156036	0.943578	0.279141
transcript=PF3D7_0814200.1	1.0462	0.842186	0.976082	0.875363	0.811949	0.0208591	1.17676	0.171699
transcript=PF3D7_0814900.1	1.03753	0.721158	0.991453	0.911437	1.06776	0.638787	1.02276	0.897062
transcript=PF3D7_0815200.1	0.899614	0.0794742	0.988105	0.838655	0.939021	0.398976	1.00069	0.990148
transcript=PF3D7_0815600.1	1.01921	0.831276	1.05092	0.524733	1.05445	0.555472	0.995323	0.946153
transcript=PF3D7_0815800.1	0.969337	0.807681	1.04355	0.673644	1.00256	0.976358	0.926725	0.45028
transcript=PF3D7_0816000.1	1.03339	0.866031	1.10151	0.651445	0.708971	0.169269	1.21376	0.466314
transcript=PF3D7_0816200.1	0.948527	0.527065	1.11463	0.235584	0.877269	0.138019	0.95393	0.571192
transcript=PF3D7_0816400.1	1.53627	0.148581	0.867652	0.326458	1.50111	0.100948	0.952331	0.608571
transcript=PF3D7_0816600.1	1.12944	0.404125	1.02865	0.871524	1.00092	0.99625	1.00991	0.950069
transcript=PF3D7_0817300.1	1.12125	0.396477	1.04818	0.584768	1.1733	0.195516	0.946148	0.539539
transcript=PF3D7_0817500.1	0.997785	0.987798	0.936385	0.651024	1.15764	0.37502	0.869543	0.103506
transcript=PF3D7_0817900.1	1.0242	0.797261	0.92812	0.43254	1.00719	0.933288	0.931494	0.392497
transcript=PF3D7_0818200.1	0.70536	0.259526	1.10658	0.573081	0.908689	0.718626	0.755624	0.235566
transcript=PF3D7_0818500.1	1.12931	0.255734	1.10557	0.258611	1.20861	0.108371	0.98694	0.885345
transcript=PF3D7_0818700.1	0.549492	0.109362	1.19469	0.668241	0.367087	0.000547196	1.37254	0.147023
transcript=PF3D7_0818800.1	0.873061	0.446024	0.839631	0.558476	0.98334	0.76825	0.995957	0.987047
transcript=PF3D7_0818900.1	1.06667	0.844218	1.08259	0.799158	0.860198	0.615514	1.09642	0.709231
transcript=PF3D7_0819600.1	0.903847	0.583923	1.00682	0.953273	0.949	0.722617	0.933389	0.609411
transcript=PF3D7_0819900.1	0.934447	0.510619	1.13829	0.289321	1.15329	0.295511	0.940073	0.490622
transcript=PF3D7_0820500.1	1.87153	0.555648	0.649611	0.316082	0.319884	0.256675	0.825343	0.657235
transcript=PF3D7_0821000.1	1.12113	0.3068	1.30492	0.0698198	0.954848	0.823147	1.15478	0.268398
transcript=PF3D7_0821200.1	0.801628	0.486648	1.0715	0.794217	0.829043	0.480558	1.18936	0.499203
transcript=PF3D7_0821700.1	0.840841	0.242905	0.700282	0.00550299	0.707515	0.148747	0.777573	0.0283345
transcript=PF3D7_0822300.1	1.00956	0.915969	1.02895	0.453963	1.01519	0.4321	0.916707	0.0140017
transcript=PF3D7_0822600.1	1.04071	0.876516	0.950381	0.353841	0.875237	0.630131	1.00844	0.875862
transcript=PF3D7_0822800.1	1.01018	0.958324	0.998403	0.990989	1.04143	0.847254	1.14098	0.311635
transcript=PF3D7_0822900.1	1.16471	0.289191	1.03837	0.826027	1.25772	0.0289576	0.923115	0.639451
transcript=PF3D7_0823200.1	0.961541	0.749587	1.03827	0.617681	1.00636	0.948883	0.958721	0.52037
transcript=PF3D7_0823300.1	1.30738	0.234509	1.14717	0.334573	0.895948	0.604508	1.216	0.163484
transcript=PF3D7_0823800.1	1.03479	0.979772	0.60361	0.110072	0.698615	0.794216	0.558519	0.0684654
transcript=PF3D7_0824600.1	1.05936	0.419603	0.986366	0.885736	1.0212	0.810383	1.02064	0.76961
transcript=PF3D7_0825000.1	0.943709	0.740784	0.850523	0.693105	1.16615	0.0720568	1.10119	0.802005
transcript=PF3D7_0825500.1	1.07087	0.731596	1.03761	0.544852	1.09267	0.498071	0.800314	0.0917599
transcript=PF3D7_0826100.1	1.06162	0.42594	1.26388	0.0116041	1.14052	0.00544025	1.32525	0.00144373
transcript=PF3D7_0826500.1	0.849044	0.0279946	1.13306	0.10572	0.828678	0.0198605	0.99523	0.959024
transcript=PF3D7_0826700.1	0.967528	0.567121	0.913169	0.129167	0.963628	0.698461	0.916029	0.111618
transcript=PF3D7_0827000.1	0.980631	0.801307	1.02516	0.782465	1.0083	0.929247	1.01304	0.879681
transcript=PF3D7_0827900.1	1.06756	0.20607	1.06067	0.557813	1.11426	0.154184	0.823526	0.155563
transcript=PF3D7_0828300.1	0.502448	0.0611715	0.514945	0.0680487	0.716337	0.402655	0.974902	0.758317
transcript=PF3D7_0828500.1	0.725354	0.181069	1.17338	0.596833	0.772644	0.264339	0.925739	0.798714
transcript=PF3D7_0829300.1	1.30465	0.215131	0.841859	0.474088	1.22987	0.419817	0.924419	0.663673
transcript=PF3D7_0830400.1	1.79186	0.325511	1.21898	0.395864	1.36312	0.64475	1.24612	0.274262
transcript=PF3D7_0830500.1	0.983567	0.95413	1.071	0.71754	1.03431	0.896118	0.847356	0.28792
transcript=PF3D7_0831400.1	0.961821	0.704582	1.14578	0.461148	0.978041	0.715717	0.974773	0.721792
transcript=PF3D7_0831500.1	0.956479	0.869228	1.07319	0.783028	0.664051	0.118272	0.860481	0.568252
transcript=PF3D7_0831700.1	1.13052	0.210475	1.04233	0.692766	1.22124	0.0786459	0.912869	0.416563
transcript=PF3D7_0832200.1;transcript=PF3D7_0832200.2	1.01105	0.880845	0.969021	0.744117	0.91946	0.508961	0.932534	0.491573
transcript=PF3D7_0902800.1	1.01881	0.961525	0.746942	0.153115	1.51906	0.272026	0.678301	0.0680801
transcript=PF3D7_0903200.1	0.965527	0.750173	0.860045	0.134819	1.00929	0.897915	0.882094	0.0956966
transcript=PF3D7_0903400.1	1.06204	0.750897	0.941981	0.460979	0.948925	0.751235	0.927123	0.310477
transcript=PF3D7_0903500.1	0.92714	0.479285	1.06368	0.453598	1.03782	0.660687	1.06736	0.579894
transcript=PF3D7_0903700.1	1.0275	0.834874	1.04166	0.686401	1.12945	0.147801	1.03474	0.775746
transcript=PF3D7_0903900.1	0.655099	0.170146	0.88197	0.0356514	0.742435	0.353486	0.942409	0.432231
transcript=PF3D7_0904000.1	0.752379	0.271778	0.509527	0.0945975	0.835231	0.588535	1.07325	0.524961
transcript=PF3D7_0904100.1	0.976646	0.645762	1.04241	0.621962	1.05123	0.693981	0.914346	0.100288
transcript=PF3D7_0904500.1	0.953498	0.585029	1.03637	0.835682	1.19652	0.300274	0.671753	0.0753052
transcript=PF3D7_0904600.1	1.12343	0.190926	1.05829	0.363749	1.18077	0.14786	0.827044	0.0179625
transcript=PF3D7_0904800.1	0.949574	0.683153	0.981805	0.614498	0.952204	0.693893	0.994116	0.850577
transcript=PF3D7_0904900.1	0.977923	0.885905	1.07585	0.44538	1.06761	0.561929	0.963258	0.66681
transcript=PF3D7_0905400.1	1.03777	0.749443	0.964616	0.473733	0.927978	0.259487	0.991089	0.869591
transcript=PF3D7_0905800.1	1.11507	0.204488	1.05093	0.605093	1.11622	0.221935	0.938459	0.604012
transcript=PF3D7_0906600.1	1.11645	0.274963	2.20289	0.068028	0.945403	0.871328	1.74862	0.332951
transcript=PF3D7_0907000.1	1.14169	0.117818	1.05384	0.521459	1.15449	0.207937	0.991371	0.903868
transcript=PF3D7_0907300.1	1.17462	0.0702732	1.00472	0.94856	1.13189	0.149096	0.973451	0.70692
transcript=PF3D7_0907400.1	0.974547	0.809462	1.05639	0.611522	1.07121	0.399462	0.857252	0.13408
transcript=PF3D7_0907600.1	0.987843	0.937986	0.703218	0.186915	0.727794	0.158602	1.12227	0.788426
transcript=PF3D7_0907700.1	1.01861	0.790851	1.00656	0.935236	0.943883	0.39906	0.911445	0.192538
transcript=PF3D7_0909300.1	0.98097	0.682862	1.15622	0.0268521	1.01662	0.814428	0.997632	0.98813
transcript=PF3D7_0909400.1	0.785648	0.153963	1.04306	0.782879	0.778301	0.136253	0.948673	0.746575
transcript=PF3D7_0909600.1	0.971844	0.751448	1.21742	0.456099	1.53108	0.1257	1.28735	0.25136
transcript=PF3D7_0909800.1	0.814524	0.350672	0.977222	0.832557	0.901079	0.630844	0.919187	0.594493
transcript=PF3D7_0909900.1	1.17698	0.361629	1.02207	0.872182	1.08683	0.717675	0.996741	0.978484
transcript=PF3D7_0910100.1	0.862629	0.404829	0.897805	0.325173	0.764734	0.199954	1.04958	0.56174
transcript=PF3D7_0910200.1	1.10128	0.720974	0.966408	0.90243	0.762371	0.371686	0.793856	0.45691
transcript=PF3D7_0910400.1	1.89177	0.00232747	1.18415	0.12477	1.77938	0.00237925	1.11925	0.356149
transcript=PF3D7_0910800.1	1.18981	0.375001	1.25794	0.373123	1.18904	0.278106	0.922369	0.670889
transcript=PF3D7_0911100.1	0.496418	0.0639485	0.76258	0.708737	0.617562	0.26696	1.10394	0.863817
transcript=PF3D7_0911900.1	1.04502	0.708957	1.05897	0.52214	1.13524	0.112298	0.995801	0.956119
transcript=PF3D7_0912100.1	0.811925	0.221667	1.19348	0.697664	0.750089	0.344648	0.433299	0.199081
transcript=PF3D7_0912500.1	0.707977	0.555672	1.15517	0.732144	0.998783	0.997969	1.69081	0.105741
transcript=PF3D7_0912900.1	0.890066	0.518783	0.981274	0.897425	0.878124	0.369931	1.27712	0.248324
transcript=PF3D7_0913000.1	1.70148	0.108665	0.814515	0.294448	1.58314	0.149778	0.686147	0.0725181
transcript=PF3D7_0913200.1	1.06299	0.554737	0.913928	0.186068	1.08286	0.498806	0.866025	0.0598025
transcript=PF3D7_0913300.1	1.12093	0.674164	1.02354	0.635241	0.831155	0.543115	0.975783	0.521855
transcript=PF3D7_0913400.1	0.766166	0.380406	1.23972	0.0579228	0.925853	0.542795	1.09693	0.330377
transcript=PF3D7_0914000.1	0.987399	0.98184	0.98048	0.944748	0.542075	0.255828	1.18047	0.518386
transcript=PF3D7_0914100.1	0.779785	0.123124	0.885563	0.10352	0.787957	0.235719	0.950064	0.368156
transcript=PF3D7_0914400.1	1.29104	0.118765	0.903485	0.422414	1.18411	0.179515	0.985993	0.928304
transcript=PF3D7_0914500.1	1.28679	0.142749	1.13831	0.223754	1.12671	0.174628	1.00536	0.956261
transcript=PF3D7_0914700.1	0.837366	0.141785	1.06577	0.620761	0.93187	0.552702	0.917971	0.402654
transcript=PF3D7_0915400.1	0.850588	0.0451495	1.05209	0.679398	0.827245	0.233624	1.26518	0.0591944
transcript=PF3D7_0916700.1	1.01148	0.887324	1.10623	0.202567	0.889266	0.306178	1.11491	0.226967
transcript=PF3D7_0917600.1	0.919665	0.576371	1.05134	0.675068	0.933685	0.532171	0.917516	0.414885
transcript=PF3D7_0917900.1	1.22813	0.0235288	1.02134	0.637219	1.21501	0.0699042	0.985755	0.676351
transcript=PF3D7_0918300.1	1.00276	0.986508	0.815969	0.0717954	0.999961	0.999715	1.06282	0.491505
transcript=PF3D7_0918900.1	1.13596	0.0172289	1.08092	0.355101	1.06124	0.297909	1.02723	0.681654
transcript=PF3D7_0919000.1	0.948172	0.73654	1.06227	0.475187	0.941053	0.719624	0.968099	0.622124
transcript=PF3D7_0919400.1	0.778216	0.184055	1.01757	0.842938	0.747886	0.0144507	1.03781	0.62016
transcript=PF3D7_0919700.1	0.953368	0.447565	0.869179	0.744725	0.943761	0.536873	0.971662	0.939276
transcript=PF3D7_0920100.1	1.22272	0.179501	1.12107	0.202545	1.13424	0.335896	1.00017	0.998938
transcript=PF3D7_0920700.1	1.25793	0.452198	1.09108	0.498312	0.863058	0.703845	0.955173	0.642814
transcript=PF3D7_0920800.1	1.01175	0.894942	0.921909	0.49796	0.916856	0.149109	1.14898	0.114835
transcript=PF3D7_0921900.1	1.2769	0.0295013	1.49967	0.686238	1.33051	0.0290706	0.836914	0.89019
transcript=PF3D7_0922100.1	1.12717	0.160765	1.06858	0.360418	1.14794	0.183585	0.985232	0.823436
transcript=PF3D7_0922200.1	0.993672	0.92954	1.04933	0.745248	1.00463	0.944877	0.990918	0.950807
transcript=PF3D7_0922500.1	1.29258	0.00987224	1.08525	0.205133	1.22693	0.120724	1.05843	0.278409
transcript=PF3D7_0922600.1	0.662876	0.0105586	0.887016	0.163976	0.652116	0.0279434	0.941409	0.421982
transcript=PF3D7_0923400.1	1.50755	0.14834	0.812456	0.0315605	1.43367	0.139672	0.787038	0.0204309
transcript=PF3D7_0923800.1;transcript=PF3D7_0923800.2	1.03925	0.460385	0.919873	0.481298	1.02717	0.701296	0.900056	0.23696
transcript=PF3D7_0923900.1	1.1507	0.0506605	1.12723	0.340736	1.10731	0.311827	1.07715	0.526089
transcript=PF3D7_0924400.1	0.833887	0.268052	1.45831	0.0276856	1.05636	0.786056	1.06961	0.687379
transcript=PF3D7_0924700.1	1.20473	0.292078	0.968491	0.777612	1.12047	0.378575	1.01762	0.80703
transcript=PF3D7_0925500.1	3.99254	0.0953015	0.753134	0.369762	4.0304	0.012724	0.902567	0.402189
transcript=PF3D7_0925900.1	0.880429	0.136016	1.00211	0.985671	0.945768	0.589093	0.880074	0.276604
transcript=PF3D7_0926400.1	1.09193	0.5535	0.880486	0.526837	1.06387	0.654299	0.785969	0.153947
transcript=PF3D7_0926700.1	0.964712	0.734172	0.938187	0.305232	0.936132	0.427021	1.02001	0.748896
transcript=PF3D7_0927600.1	1.3665	0.0115717	1.13662	0.212647	1.36017	0.020643	1.01757	0.858921
transcript=PF3D7_0929200.1	1.23531	0.0456579	1.01708	0.894991	1.2036	0.181079	0.929124	0.462021
transcript=PF3D7_0929400.1	0.899741	0.66795	0.920621	0.688137	0.782445	0.102431	0.975912	0.855678
transcript=PF3D7_0930300.1	1.03947	0.497476	0.995824	0.911449	0.992463	0.807765	1.02921	0.546536
transcript=PF3D7_0930600.1	0.933788	0.739898	0.84702	0.515628	0.953136	0.86591	1.15083	0.266862
transcript=PF3D7_0930800.1	1.2305	0.0628134	0.875768	0.152881	1.17709	0.648273	0.847455	0.18187
transcript=PF3D7_0931100.1	0.561681	0.257298	1.01537	0.910446	1.31371	0.677237	0.853047	0.310036
transcript=PF3D7_0931400.1	0.917717	0.474667	1.02411	0.645633	0.933943	0.581269	1.01448	0.777325
transcript=PF3D7_0931800.1	0.877816	0.0352283	0.956437	0.0718336	0.927306	0.137631	0.958918	0.157017
transcript=PF3D7_0932200.1	1.16358	0.319404	1.10567	0.240681	1.13823	0.226014	0.950784	0.54021
transcript=PF3D7_0932300.1	0.853058	0.265341	0.891931	0.32132	0.758631	0.0943949	0.901949	0.250558
transcript=PF3D7_0932800.1	0.961123	0.828847	1.21247	0.398768	0.799887	0.369379	1.50754	0.0549015
transcript=PF3D7_0933000.1	1.1829	0.497852	1.03562	0.862963	1.16626	0.329958	1.09039	0.655127
transcript=PF3D7_0933200.1	0.698632	0.159063	1.40408	0.107284	0.798046	0.331276	1.3131	0.267153
transcript=PF3D7_0933600.1	1.14151	0.583074	0.952496	0.608846	0.733479	0.163135	1.02533	0.848095
transcript=PF3D7_0934500.1	0.914176	0.60929	0.867111	0.047854	0.951076	0.690819	0.8403	0.00892497
transcript=PF3D7_0934700.1	0.839769	0.319747	0.9769	0.924134	0.935126	0.588936	1.09685	0.805813
transcript=PF3D7_0934800.1	0.310597	0.136081	0.715156	0.421548	0.596947	0.387134	0.999857	0.999627
transcript=PF3D7_0935200.1	0.92426	0.908375	0.234981	0.212581	0.970199	0.967521	0.214655	0.203604
transcript=PF3D7_0935800.1	0.920043	0.456786	0.993776	0.921608	0.830303	0.162415	0.961774	0.562096
transcript=PF3D7_0935900.1	1.04339	0.678707	1.1227	0.279796	1.0637	0.457321	0.962082	0.66897
transcript=PF3D7_0936000.1	1.5007	0.112227	0.985688	0.927223	1.7823	0.0590369	1.00341	0.977991
transcript=PF3D7_0936300.1	0.903303	0.572078	0.899835	0.155049	0.714477	0.0518569	0.886656	0.341256
transcript=PF3D7_0936600.1	0.986434	0.938585	0.925637	0.326508	0.790921	0.259641	1.2024	0.0911233
transcript=PF3D7_0936800.1	0.846574	0.38539	1.08214	0.827618	1.38554	0.0225364	1.17845	0.323863
transcript=PF3D7_1001000.1	1.01952	0.831267	1.2504	0.419675	1.03637	0.834584	0.6598	0.174279
transcript=PF3D7_1001100.1	0.943427	0.470819	1.2383	0.120431	1.17599	0.0392624	1.20129	0.0252543
transcript=PF3D7_1001200.1	1.12314	0.327627	0.997582	0.976372	1.13489	0.152074	0.952918	0.632361
transcript=PF3D7_1001400.1	0.973498	0.742632	1.12626	0.313696	0.990288	0.85235	1.00601	0.953492
transcript=PF3D7_1002400.1	1.05673	0.656334	1.08245	0.261457	1.01967	0.838952	0.995744	0.95283
transcript=PF3D7_1002900.1	1.05743	0.211868	1.04154	0.569217	1.0783	0.329043	0.973681	0.662094
transcript=PF3D7_1003500.1	0.969825	0.496303	0.943501	0.434649	0.955016	0.545004	0.960775	0.503587
transcript=PF3D7_1003600.1	0.94415	0.71584	0.732511	0.403237	0.726649	0.435115	0.899486	0.712322
transcript=PF3D7_1003800.1	1.11057	0.763033	0.946316	0.696715	1.09343	0.798103	1.11777	0.117745
transcript=PF3D7_1004000.1	0.93776	0.736684	0.809625	0.167362	0.776748	0.347022	0.943704	0.601222
transcript=PF3D7_1004300.1	1.05516	0.639061	1.11814	0.1511	1.09329	0.32687	1.0444	0.614878
transcript=PF3D7_1004400.1	1.05815	0.648293	1.06862	0.534878	1.05091	0.688455	1.01531	0.865322
transcript=PF3D7_1004500.1	0.96987	0.83216	1.0226	0.743104	1.01125	0.927892	0.948909	0.270089
transcript=PF3D7_1006200.1	0.96508	0.699878	1.03559	0.577985	1.05325	0.458236	0.960911	0.531663
transcript=PF3D7_1006600.1	0.981366	0.864216	0.895588	0.48586	0.993351	0.929703	1.0555	0.644275
transcript=PF3D7_1006700.1	1.07658	0.113196	1.12545	0.191174	1.14266	0.207908	1.03666	0.682881
transcript=PF3D7_1006800.1	0.968412	0.607599	1.00548	0.887462	1.00976	0.88978	0.962262	0.302537
transcript=PF3D7_1239200.1	1.69048	0.00882412	1.44519	0.0207913	1.76015	0.00653733	1.2634	0.0359821
transcript=PF3D7_1007900.1	0.988336	0.882008	0.93606	0.36901	1.079	0.295591	1.01778	0.775838
transcript=PF3D7_1008000.1	1.01073	0.937542	1.09017	0.315075	0.994429	0.95424	0.922826	0.396123
transcript=PF3D7_1008100.1	0.953354	0.817288	0.992953	0.964832	0.891982	0.321752	1.14575	0.401114
transcript=PF3D7_1008400.1	1.04617	0.667129	1.06513	0.448981	1.00871	0.928037	1.08967	0.459896
transcript=PF3D7_1008700.1	0.914503	0.122956	0.977968	0.621678	0.857525	0.122142	1.01336	0.834398
transcript=PF3D7_1008800.1	1.00199	0.97568	1.00713	0.803116	1.01904	0.720496	0.94875	0.151929
transcript=PF3D7_1008900.1	1.05947	0.649689	1.12038	0.172163	1.11347	0.244339	1.03888	0.67328
transcript=PF3D7_1009400.1	1.72939	0.34902	0.446274	0.0277776	1.5161	0.474175	0.432415	0.0247587
transcript=PF3D7_1009600.1	1.53115	0.146396	0.984676	0.942175	1.19796	0.604485	0.740362	0.30624
transcript=PF3D7_1010600.1	0.966552	0.534726	0.78589	0.231974	0.97969	0.583775	0.89372	0.0586725
transcript=PF3D7_1010700.1	1.31212	0.0113791	0.886366	0.0681694	1.23789	0.0111737	0.944667	0.292866
transcript=PF3D7_1011400.1	0.868788	0.417428	1.13111	0.193531	1.07814	0.507122	0.8569	0.354629
transcript=PF3D7_1011700.1	1.07298	0.303082	1.12794	0.134487	1.09661	0.279347	1.0118	0.861799
transcript=PF3D7_1011800.1	0.940418	0.37609	0.954796	0.11607	1.03415	0.555801	0.915037	0.0121182
transcript=PF3D7_1012200.1	0.780079	0.627544	0.952518	0.387216	1.23984	0.618061	1.04508	0.229572
transcript=PF3D7_1012400.1	0.939537	0.596238	1.03507	0.528148	1.01897	0.879426	0.972835	0.622415
transcript=PF3D7_1012600.1	1.14484	0.474755	1.12088	0.531697	1.09734	0.490481	1.28381	0.190449
transcript=PF3D7_1012700.1	1.09907	0.444237	1.05217	0.456835	1.40514	0.0698182	1.04127	0.443949
transcript=PF3D7_1013500.1	1.0054	0.968442	0.991506	0.959294	1.00888	0.938153	0.792194	0.424691
transcript=PF3D7_1013600.1	1.02446	0.913005	0.820439	0.0660786	1.27247	0.546852	0.786584	0.00432957
transcript=PF3D7_1014100.1	1.35259	0.213403	1.14393	0.510246	1.49415	0.144672	1.07513	0.622281
transcript=PF3D7_1014300.1	0.839661	0.326774	1.24674	0.0794556	0.784587	0.148983	0.967479	0.827957
transcript=PF3D7_1014600.1	1.07963	0.326868	0.964349	0.640029	1.05823	0.501283	1.01129	0.908065
transcript=PF3D7_1014900.1	0.936902	0.845848	1.23489	0.247769	0.939807	0.813094	1.19871	0.520443
transcript=PF3D7_1015200.1;transcript=PF3D7_1015200.2;transcript=PF3D7_1015200.3	0.925828	0.176974	0.969148	0.711634	0.929832	0.0210496	1.00537	0.912944
transcript=PF3D7_1015600.1	0.982659	0.784926	0.994658	0.970053	1.00978	0.84256	0.878878	0.121188
transcript=PF3D7_1015800.1	0.789144	0.114319	0.76993	0.0459838	0.872482	0.262668	0.808555	0.0719417
transcript=PF3D7_1015900.1	0.824008	0.0135695	0.914606	0.0246187	0.787875	0.00640621	0.98059	0.787637
transcript=PF3D7_1016300.1	0.960615	0.778017	1.03585	0.603688	1.04247	0.628892	0.922277	0.264422
transcript=PF3D7_1016400.1	0.968069	0.843569	1.3903	0.142111	1.18971	0.724259	1.24131	0.327938
transcript=PF3D7_1017000.1	1.18259	0.116645	1.04496	0.811458	1.15659	0.124232	1.06049	0.496183
transcript=PF3D7_1017100.1	1.32191	0.0368497	1.09297	0.428418	1.43088	0.0588154	0.995539	0.966194
transcript=PF3D7_1017300.1;transcript=PF3D7_1017300.2	0.774645	0.59278	0.932159	0.849615	0.741776	0.542412	1.07909	0.807282
transcript=PF3D7_1017500.1	0.793402	0.444067	0.954058	0.576094	0.933375	0.799248	1.04529	0.777582
transcript=PF3D7_1017900.1	1.03041	0.880427	0.985426	0.908721	0.81315	0.388276	1.02958	0.768696
transcript=PF3D7_1018200.1	0.765136	0.068095	1.22861	0.582244	0.863437	0.445472	0.681582	0.133011
transcript=PF3D7_1018500.1	1.08066	0.310585	1.08361	0.435604	0.991626	0.92475	0.971716	0.773325
transcript=PF3D7_1019000.1	1.1301	0.307496	1.28961	0.0754459	1.09952	0.294153	1.1969	0.162198
transcript=PF3D7_1019400.1	0.809134	0.201901	0.76271	0.0398009	0.700662	0.0579497	0.920608	0.355594
transcript=PF3D7_1019700.1	1.10235	0.4988	0.732643	0.223403	1.04222	0.556694	0.577803	0.0499948
transcript=PF3D7_1020700.1	0.703802	0.234074	0.843981	0.454385	0.917185	0.705755	0.913134	0.722011
transcript=PF3D7_1020900.1	1.02627	0.865287	0.97808	0.807162	0.847604	0.497911	1.1298	0.240869
transcript=PF3D7_1021500.1	1.08092	0.56855	1.12684	0.0239696	1.03576	0.740029	1.09282	0.0302374
transcript=PF3D7_1021600.1	1.05935	0.264036	1.01798	0.804368	1.08549	0.313214	0.911801	0.222291
transcript=PF3D7_1021800.1	1.27881	0.0408509	1.01392	0.874677	1.20333	0.115901	0.968267	0.573999
transcript=PF3D7_1021900.1	1.04422	0.661233	1.13995	0.170543	1.08119	0.308818	0.998422	0.98635
transcript=PF3D7_1022400.1	0.992592	0.922034	1.00286	0.959016	0.98233	0.764756	0.950012	0.412922
transcript=PF3D7_1023900.1	0.939057	0.657475	1.05806	0.534643	1.01589	0.891574	0.936016	0.496209
transcript=PF3D7_1024800.1	0.812225	0.391217	0.958132	0.713772	0.811509	0.336192	0.944337	0.629789
transcript=PF3D7_1025000.1	0.749532	0.321643	1.17437	0.417875	1.05755	0.73216	1.09589	0.618923
transcript=PF3D7_1025300.1	0.953802	0.611146	1.31385	0.0543187	0.888542	0.447579	1.17815	0.271366
transcript=PF3D7_1007700.1	1.601	0.0188227	1.30993	0.0280808	1.88952	0.00642815	1.24965	0.0508276
transcript=PF3D7_1026800.1	1.02014	0.702049	0.95399	0.161312	0.970155	0.562167	0.983701	0.49311
transcript=PF3D7_1027100.1	0.670153	0.22213	1.99442	0.00267574	0.802747	0.451362	1.84218	0.0814811
transcript=PF3D7_1027300.1	1.21363	0.153762	1.22008	0.109805	1.20817	0.00591767	1.09689	0.501733
transcript=PF3D7_1027700.1;transcript=PF3D7_1027700.2	1.09219	0.411563	1.09703	0.389569	1.09731	0.320224	0.754777	0.177958
transcript=PF3D7_1027800.1	0.995739	0.94612	1.13651	0.00183647	1.0875	0.322206	1.07897	0.0310559
transcript=PF3D7_1028400.1	1.06384	0.50538	0.985393	0.810283	0.903331	0.131684	1.02037	0.64408
transcript=PF3D7_1028600.1	0.95322	0.780786	1.07128	0.497465	1.00072	0.994916	0.954133	0.695868
transcript=PF3D7_1028700.1	1.08375	0.580157	1.02059	0.838939	1.0624	0.434246	0.942205	0.589318
transcript=PF3D7_1029600.1	1.08484	0.380318	1.06486	0.537311	1.11371	0.327122	0.982126	0.879227
transcript=PF3D7_1030000.1	1.53468	0.0396225	1.08997	0.265651	1.56156	0.0259057	0.997361	0.968181
transcript=PF3D7_1030100.1	1.09216	0.724697	1.05826	0.548093	1.20754	0.40108	0.872519	0.352447
transcript=PF3D7_1030500.1	0.57074	0.104475	0.967358	0.605159	0.881659	0.696672	1.07656	0.216258
transcript=PF3D7_1031200.1	1.18498	0.170448	1.10751	0.207081	1.21968	0.0569321	0.99432	0.963863
transcript=PF3D7_1031300.1	0.98166	0.870514	1.08629	0.715001	0.907087	0.450309	1.04164	0.798142
transcript=PF3D7_1031600.1	1.16572	0.257596	1.00346	0.990422	1.17787	0.271026	1.148	0.532301
transcript=PF3D7_1031700.1	0.708035	0.0950623	0.910535	0.552925	1.18012	0.225013	1.03384	0.807699
transcript=PF3D7_1032100.1	1.02073	0.893297	0.969691	0.814287	0.998121	0.98645	0.756782	0.0487336
transcript=PF3D7_1033100.1	1.25642	0.019842	1.05137	0.501279	1.22744	0.0541139	1.02946	0.713204
transcript=PF3D7_1033200.1	0.827195	0.31897	1.0535	0.617284	0.948875	0.691871	0.872651	0.216604
transcript=PF3D7_1033400.1	1.05962	0.410017	0.824849	0.0558491	1.07349	0.276483	0.975901	0.819866
transcript=PF3D7_1033500.1	1.06747	0.78475	0.882864	0.393447	1.12855	0.365312	0.898931	0.349257
transcript=PF3D7_1033600.1	1.14763	0.409443	0.97476	0.785377	1.14059	0.310542	0.875895	0.298449
transcript=PF3D7_1033700.1	1.31184	0.3073	0.958004	0.685061	1.25005	0.0271886	0.915797	0.415388
transcript=PF3D7_1034000.1	4.22773	0.158447	1.62209	0.132287	2.36222	0.202261	1.22079	0.600527
transcript=PF3D7_1034900.1	0.901928	0.349092	0.9619	0.770624	0.820708	0.184498	0.946213	0.692472
transcript=PF3D7_1035100.1	0.946961	0.789409	1.062	0.630143	0.969479	0.891463	1.08765	0.297412
transcript=PF3D7_1035200.1	0.971559	0.830367	1.12892	0.298633	1.03698	0.784868	1.03739	0.772565
transcript=PF3D7_1035300.1	1.17024	0.150879	1.10852	0.284897	1.30958	0.0089708	1.01095	0.891323
transcript=PF3D7_1035500.1	0.903356	0.543623	0.812397	0.220987	1.21771	0.420963	0.922162	0.67303
transcript=PF3D7_1035700.1	0.959805	0.838283	0.951502	0.683727	1.09895	0.654319	0.837266	0.0792639
transcript=PF3D7_1035900.1	1.40376	0.237432	0.901749	0.619636	1.59034	0.0869484	0.864434	0.489479
transcript=PF3D7_1036900.1	1.09775	0.576014	1.0629	0.382345	1.13654	0.169916	0.938711	0.368163
transcript=PF3D7_1037100.1	0.581241	0.0216006	0.860419	0.596507	0.52796	0.0182927	1.18571	0.35886
transcript=PF3D7_1037300.1	0.653276	0.420608	1.10136	0.0535718	0.675982	0.449175	1.01765	0.700383
transcript=PF3D7_1037700.1	1.01137	0.950032	1.12147	0.428151	1.45889	0.0552153	1.10653	0.646161
transcript=PF3D7_1039000.1	0.808491	0.181438	0.934013	0.571223	0.759247	0.079352	0.853739	0.290804
transcript=PF3D7_1039100.1;transcript=PF3D7_1102200.1	1.26915	0.125937	0.897716	0.331766	1.19477	0.307487	0.967284	0.705332
transcript=PF3D7_1102500.1	1.0084	0.949641	1.01686	0.910353	0.997729	0.984665	0.981148	0.863982
transcript=PF3D7_1103100.1	1.1849	0.0801451	1.0734	0.438661	1.1421	0.143429	1.03187	0.694251
transcript=PF3D7_1103600.1	0.940856	0.752475	0.793	0.063437	0.694873	0.0358446	0.988698	0.886059
transcript=PF3D7_1103700.1	0.936961	0.486855	0.934869	0.451542	0.9636	0.705194	1.0101	0.897231
transcript=PF3D7_1103800.1	1.11456	0.215405	0.962015	0.636024	1.17638	0.203686	0.812194	0.265941
transcript=PF3D7_1104000.1	1.09422	0.797142	0.950508	0.721891	0.807533	0.540555	0.741036	0.227109
transcript=PF3D7_1104100.1	0.904594	0.428611	1.09001	0.453833	0.864342	0.185035	1.0063	0.958105
transcript=PF3D7_1104200.1	1.14938	0.175916	1.12312	0.0396302	1.10223	0.209898	1.06451	0.306724
transcript=PF3D7_1104400.1	0.854523	0.442259	0.959101	0.792812	0.774175	0.219196	1.0763	0.460801
transcript=PF3D7_1105000.1	1.0272	0.890799	0.823226	0.0856194	1.00505	0.977792	0.897535	0.316653
transcript=PF3D7_1105100.1	0.857153	0.229931	0.794877	0.0716988	0.744424	0.105978	0.922059	0.442067
transcript=PF3D7_1105400.1	1.22228	0.563054	1.02778	0.905073	0.686253	0.118959	1.15805	0.398803
transcript=PF3D7_1105600.1	0.820352	0.370168	0.870654	0.293596	0.534565	0.0819666	1.03425	0.754622
transcript=PF3D7_1105700.1	0.943841	0.827755	0.89426	0.416301	0.804147	0.187926	0.887329	0.35548
transcript=PF3D7_1105800.1	0.991738	0.929603	1.07087	0.406118	1.0607	0.457647	0.934582	0.346718
transcript=PF3D7_1106000.1	0.993716	0.973548	0.832744	0.151708	0.893932	0.564386	0.942246	0.49705
transcript=PF3D7_1107000.1	0.715511	0.209111	1.03556	0.58546	0.822923	0.294494	1.23041	0.00445291
transcript=PF3D7_1107200.1	1.04291	0.7082	0.951623	0.765935	0.976344	0.840946	0.759394	0.236386
transcript=PF3D7_1107300.1	1.21864	0.323987	1.00579	0.920908	1.15077	0.308503	0.981042	0.794793
transcript=PF3D7_1107700.1	0.848533	0.109267	0.687073	0.113622	0.836587	0.0877285	1.15227	0.411675
transcript=PF3D7_1107800.1	0.938216	0.628452	1.04781	0.580477	0.964908	0.812398	0.94962	0.641407
transcript=PF3D7_1108000.1	0.625075	0.47368	0.546679	0.464816	0.39191	0.152028	0.616349	0.527203
transcript=PF3D7_1108400.1	1.02607	0.907239	0.895933	0.449917	0.821665	0.365323	0.977376	0.726887
transcript=PF3D7_1108500.1	1.05716	0.874446	0.97651	0.851771	1.03579	0.893899	0.986263	0.908856
transcript=PF3D7_1108600.1	0.973813	0.731391	1.09422	0.256971	0.98569	0.889679	1.006	0.945334
transcript=PF3D7_1108700.1	1.20616	0.0864892	1.0801	0.369612	1.09677	0.325546	1.03147	0.745222
transcript=PF3D7_1109400.1	1.00213	0.989163	1.16713	0.560195	0.995235	0.989918	0.710769	0.214974
transcript=PF3D7_1109900.1	1.59162	0.0862135	1.09124	0.428464	1.3658	0.0564269	1.1925	0.0431238
transcript=PF3D7_1110200.1	0.595611	0.0558852	1.20841	0.242683	0.897908	0.675506	1.35769	0.0846107
transcript=PF3D7_1110400.1	1.07152	0.606642	0.972698	0.791278	1.20011	0.0582688	0.881902	0.265654
transcript=PF3D7_1110500.1	0.632001	0.226104	1.15837	0.670304	0.556623	0.114819	1.3084	0.326917
transcript=PF3D7_1110700.1	0.900488	0.180573	1.06325	0.392943	0.900428	0.181123	1.03846	0.519208
transcript=PF3D7_1111100.1	0.71199	0.127055	0.64483	0.257101	0.706576	0.123032	1.54635	0.117622
transcript=PF3D7_1111300.1	1.44006	0.352087	1.28035	0.115282	2.27805	0.0379491	0.966712	0.876765
transcript=PF3D7_1111500.1	1.12567	0.0346258	0.98962	0.905269	1.13997	0.48352	0.811589	0.0235372
transcript=PF3D7_1113400.1	1.00844	0.946959	1.04367	0.637519	1.02546	0.758352	1.03804	0.704977
transcript=PF3D7_1113700.1	0.948386	0.695052	0.880112	0.275227	1.06818	0.496139	0.831177	0.0967464
transcript=PF3D7_1114100.1;transcript=PF3D7_1114100.2	1.20757	0.190649	1.00118	0.991806	1.28337	0.0107074	0.97351	0.815509
transcript=PF3D7_1115200.1	0.959791	0.723135	1.35955	0.314931	0.885868	0.199356	1.41528	0.0600309
transcript=PF3D7_1115400.1	0.973783	0.557093	1.03465	0.468303	1.01636	0.631119	0.994558	0.903383
transcript=PF3D7_1115600.1	1.0905	0.0735165	0.921872	0.240976	1.05706	0.281685	0.988498	0.69845
transcript=PF3D7_1115700.1	0.928874	0.262681	0.97563	0.706411	0.961371	0.636161	1.01694	0.72621
transcript=PF3D7_1115800.1	0.954699	0.659154	1.0658	0.429556	0.9258	0.440804	0.942328	0.503533
transcript=PF3D7_1116000.1	1.08449	0.374973	1.2133	0.0392891	1.12724	0.192223	1.02168	0.794004
transcript=PF3D7_1116200.1	0.921084	0.438699	0.829019	0.138135	0.815332	0.0434447	0.916721	0.526425
transcript=PF3D7_1116300.1	0.836684	0.367666	0.918024	0.368396	0.740235	0.117822	0.879059	0.236483
transcript=PF3D7_1116500.1	0.417382	0.118124	1.00936	0.943848	0.929675	0.823178	0.89072	0.365571
transcript=PF3D7_1116700.1	1.15753	0.168887	1.00363	0.959868	1.17549	0.141232	0.922661	0.333737
transcript=PF3D7_1116800.1	0.961762	0.842163	1.08191	0.688506	0.884332	0.632879	0.987373	0.930095
transcript=PF3D7_1117100.1	0.868535	0.228115	1.04952	0.396591	0.929033	0.415688	1.08422	0.319584
transcript=PF3D7_1117700.1	0.893669	0.086226	0.918805	0.252112	0.922782	0.430458	1.00944	0.89601
transcript=PF3D7_1117900.1	0.731211	0.183495	0.707018	0.162735	0.612463	0.0615132	0.714583	0.174079
transcript=PF3D7_1118000.1	0.381868	0.080199	0.898663	0.438514	0.943216	0.709449	0.930781	0.464826
transcript=PF3D7_1118200.1	1.11766	0.547589	1.18673	0.026719	1.29701	0.0735741	1.22531	0.0136772
transcript=PF3D7_1118300.1	0.865119	0.299865	0.98422	0.826583	0.766432	0.0921632	1.0317	0.638753
transcript=PF3D7_1118500.1	1.28793	0.198811	1.06208	0.451988	1.1233	0.0732729	1.04748	0.488583
transcript=PF3D7_1118600.1	1.0676	0.543652	1.06173	0.455504	1.03263	0.725717	0.914079	0.26545
transcript=PF3D7_1119000.1	0.951274	0.741032	1.32354	0.0223269	0.942978	0.731283	0.993583	0.980452
transcript=PF3D7_1119600.1	1.46422	0.291516	1.27813	0.332008	1.50606	0.186918	1.23726	0.403884
transcript=PF3D7_1119800.1	1.30303	0.454471	0.970852	0.796505	1.28917	0.471488	1.04206	0.678567
transcript=PF3D7_1120000.1	1.02318	0.824717	1.10254	0.365628	1.03524	0.711344	0.940555	0.527082
transcript=PF3D7_1120100.1	1.10001	0.0859502	1.04341	0.394606	1.18631	0.0508481	1.0767	0.245498
transcript=PF3D7_1120500.1	0.964721	0.846447	1.07692	0.623729	1.07673	0.835325	0.982567	0.889023
transcript=PF3D7_1121100.1	1.12202	0.144415	0.900132	0.647401	1.17205	0.228476	0.843596	0.568058
transcript=PF3D7_1121600.1	0.921929	0.326939	1.08792	0.105321	0.923067	0.0751753	1.00788	0.863293
transcript=PF3D7_1121700.1	1.16241	0.137695	1.01977	0.762515	1.10958	0.19009	0.961082	0.594755
transcript=PF3D7_1122500.1	0.984333	0.893142	1.05978	0.692873	0.777709	0.276415	0.872194	0.409067
transcript=PF3D7_1123100.1	0.970259	0.866988	1.10101	0.265502	1.02941	0.67481	0.960877	0.660145
transcript=PF3D7_1123200.1	0.925998	0.584096	1.22315	0.226198	1.00364	0.977759	1.1223	0.471525
transcript=PF3D7_1123400.1	1.10356	0.579295	1.23932	0.0679477	1.0296	0.819272	1.07547	0.446078
transcript=PF3D7_1123500.1	0.914335	0.458874	0.902592	0.437501	1.05975	0.737591	0.912219	0.47105
transcript=PF3D7_1123900.1	0.824851	0.396107	1.11081	0.428077	0.77036	0.264706	0.969403	0.806399
transcript=PF3D7_1124300.1	1.10073	0.213691	1.1677	0.0553932	1.12506	0.0699484	1.07862	0.281496
transcript=PF3D7_1124600.1	1.00487	0.961264	1.0261	0.55268	1.01435	0.881166	0.963878	0.599699
transcript=PF3D7_1124700.1	1.17342	0.191581	1.0414	0.671366	1.16299	0.205077	0.927243	0.430831
transcript=PF3D7_1124800.1	0.878839	0.418686	1.08821	0.593307	0.9071	0.522921	1.0315	0.838175
transcript=PF3D7_1124900.1	0.892179	0.39822	0.97066	0.552191	0.927595	0.497721	0.884661	0.0624364
transcript=PF3D7_1125500.1	1.13762	0.644934	1.15088	0.408921	1.52525	0.127604	0.999029	0.99542
transcript=PF3D7_1125800.1	1.3715	0.355331	1.07583	0.569033	1.39418	0.281471	1.16462	0.221925
transcript=PF3D7_1125900.1	1.08037	0.575067	1.06844	0.307075	1.14015	0.240341	1.01167	0.713784
transcript=PF3D7_1126000.1	1.07964	0.433091	0.851083	0.0984678	1.02595	0.706166	0.860355	0.11765
transcript=PF3D7_1126200.1	0.988277	0.868861	1.17035	0.258744	1.04719	0.500177	1.00336	0.979967
transcript=PF3D7_1126500.1	0.57275	0.0887037	1.03479	0.833505	0.544719	0.0607572	1.00386	0.981268
transcript=PF3D7_1126900.1	1.01963	0.804944	0.939386	0.264863	1.0886	0.422526	0.897204	0.0717828
transcript=PF3D7_1127100.1	1.11124	0.211951	1.13472	0.197782	1.07346	0.35781	0.996705	0.951617
transcript=PF3D7_1127600.1	1.03196	0.906176	1.37666	0.204975	0.694829	0.0347859	1.85457	0.116135
transcript=PF3D7_1127800.1	0.796782	0.402432	0.822107	0.359887	0.676462	0.18586	0.563322	0.0370268
transcript=PF3D7_1128000.1;transcript=PF3D7_1128000.2	0.780135	0.0544364	1.10954	0.318786	0.95503	0.620232	1.15741	0.125717
transcript=PF3D7_1128100.1	1.11683	0.434082	1.13271	0.527538	1.01326	0.892895	0.893772	0.59005
transcript=PF3D7_1128200.1	0.957044	0.59358	1.28717	0.53217	0.91665	0.570351	0.999991	0.999983
transcript=PF3D7_1128400.1	0.783945	0.0134722	0.959073	0.53926	1.01112	0.916412	1.00437	0.966974
transcript=PF3D7_1129000.1	1.15213	0.786906	0.811717	0.430415	0.917228	0.890755	0.645682	0.0902661
transcript=PF3D7_1129100.1	1.01762	0.862964	1.09959	0.0380862	1.03486	0.762528	1.01404	0.704394
transcript=PF3D7_1129200.1	0.910922	0.188019	0.98576	0.813388	0.993624	0.937278	1.00738	0.866065
transcript=PF3D7_1129400.1	1.04748	0.45464	0.964916	0.745729	0.999615	0.993944	0.887158	0.0892075
transcript=PF3D7_1130100.1	1.34356	0.0260057	1.22128	0.0401162	1.49133	0.00415185	1.20835	0.104234
transcript=PF3D7_1130200.1	0.95795	0.384674	0.940677	0.0789678	1.01179	0.768308	0.936465	0.0534701
transcript=PF3D7_1130400.1	1.11927	0.38841	1.0432	0.472267	1.18562	0.272074	0.994915	0.956471
transcript=PF3D7_1130700.1	0.946211	0.505527	1.04666	0.817764	0.677573	0.113314	0.871564	0.48562
transcript=PF3D7_1132000.1	1.22565	0.00746227	1.09761	0.373588	1.186	0.171879	1.10912	0.415322
transcript=PF3D7_1132200.1	0.975312	0.670666	1.01691	0.77268	0.999735	0.995328	1.03956	0.320774
transcript=PF3D7_1132300.1	0.849489	0.309058	0.926056	0.220108	1.24159	0.118938	0.87717	0.0570017
transcript=PF3D7_1132400.1	1.10196	0.589263	1.07198	0.504831	1.2409	0.0811473	0.874319	0.298027
transcript=PF3D7_1132900.1	0.981046	0.957968	0.831925	0.464002	1.09065	0.813312	1.00117	0.989416
transcript=PF3D7_1133200.1	1.06022	0.709508	1.08813	0.294381	0.900279	0.634501	0.978836	0.779796
transcript=PF3D7_1133400.1	0.737099	0.351988	1.48738	0.0733768	0.828317	0.521754	1.48217	0.100883
transcript=PF3D7_1133800.1	1.25157	0.0628466	0.926701	0.358014	1.16883	0.241671	0.883516	0.0580214
transcript=PF3D7_1134000.1	1.37036	0.00730035	1.09852	0.207496	1.32907	0.0206081	1.04674	0.538439
transcript=PF3D7_1134100.1	0.783948	0.241339	0.901494	0.42033	0.657074	0.0563096	0.986233	0.866898
transcript=PF3D7_1134600.1	1.14047	0.276875	1.03235	0.759621	1.16031	0.228997	1.01615	0.874689
transcript=PF3D7_1134800.1	0.831913	0.536739	1.01847	0.798977	1.30955	0.1285	1.04401	0.55034
transcript=PF3D7_1135100.1	0.859967	0.613926	1.08262	0.144558	1.13515	0.71588	0.967329	0.623073
transcript=PF3D7_1135400.1	0.911315	0.602028	0.980397	0.704578	0.734592	0.179658	1.08894	0.158043
transcript=PF3D7_1136200.1	1.16478	0.376665	1.17327	0.323934	0.952659	0.799471	1.23126	0.16553
transcript=PF3D7_1136300.1	0.962467	0.758307	1.01134	0.952154	0.921616	0.481877	1.13112	0.559525
transcript=PF3D7_1136400.1	1.02613	0.531298	0.993806	0.913806	1.00249	0.967474	0.9389	0.262214
transcript=PF3D7_1136500.1;transcript=PF3D7_1136500.2	0.771942	0.198778	0.691911	0.174724	0.689457	0.223858	0.634389	0.246603
transcript=PF3D7_1137300.1	0.716778	0.00949997	1.00222	0.988145	0.977789	0.811233	0.832927	0.152756
transcript=PF3D7_1138000.1	1.009	0.944934	0.780122	0.314154	1.00323	0.96291	0.414	0.0758515
transcript=PF3D7_1138500.1	0.981454	0.878072	1.04741	0.503757	0.969486	0.785285	0.922143	0.278596
transcript=PF3D7_1138800.1	0.899333	0.21926	0.948471	0.725355	0.959363	0.641766	0.981011	0.833499
transcript=PF3D7_1140100.1	1.05179	0.625351	1.04273	0.25551	0.999723	0.997418	1.03427	0.540548
transcript=PF3D7_1140200.1	1.11449	0.422613	1.10214	0.149911	1.06289	0.575624	1.03622	0.52475
transcript=PF3D7_1140400.1	1.33461	0.318251	1.09673	0.325029	1.53144	0.0202763	0.905533	0.322144
transcript=PF3D7_1140800.1	1.11255	0.391431	1.20005	0.0528943	1.16883	0.00579277	1.05867	0.663
transcript=PF3D7_1141300.1	1.35774	0.00595748	0.878858	0.421699	1.21653	0.0595946	0.938863	0.695976
transcript=PF3D7_1141700.1	1.29512	0.014399	1.50865	0.271913	1.23353	0.134683	1.12316	0.791616
transcript=PF3D7_1142100.1	1.16657	0.0296891	1.12624	0.116134	1.14054	0.279009	1.03449	0.680646
transcript=PF3D7_1142400.1	0.966516	0.854729	0.816151	0.373403	0.82655	0.522506	0.792587	0.288625
transcript=PF3D7_1142500.1	1.06497	0.664859	1.08132	0.663967	1.23836	0.181643	0.920408	0.454414
transcript=PF3D7_1142600.1	0.835181	0.476851	0.81429	0.276181	0.68503	0.344433	0.998535	0.991045
transcript=PF3D7_1143400.1	1.32055	0.128776	0.88846	0.30653	1.24928	0.0883014	0.941148	0.719982
transcript=PF3D7_1144000.1	1.05721	0.537026	1.03226	0.717543	0.924327	0.431531	0.956073	0.611674
transcript=PF3D7_1144600.1	1.15545	0.215361	1.07936	0.457518	1.17682	0.0787879	0.951759	0.64204
transcript=PF3D7_1144900.1	0.970534	0.575885	0.944654	0.101323	0.950475	0.197974	0.993218	0.852715
transcript=PF3D7_1145100.1	0.969201	0.816382	0.69779	0.0386594	1.02316	0.842658	0.883519	0.452033
transcript=PF3D7_1145400.1	1.38944	0.181243	0.869578	0.549765	1.26224	0.358554	1.1468	0.0919756
transcript=PF3D7_1146000.1	1.00668	0.973147	1.14649	0.564252	1.09489	0.604741	1.05068	0.645544
transcript=PF3D7_1147300.1	1.1299	0.196398	1.08351	0.369498	1.12938	0.376613	1.01543	0.912621
transcript=PF3D7_1149000.1	1.08013	0.642168	1.0849	0.287522	1.12478	0.150993	0.955045	0.452488
transcript=PF3D7_1149100.1;transcript=PF3D7_1149100.2	0.932688	0.539644	0.891289	0.426144	0.834524	0.207296	0.781352	0.0957029
transcript=PF3D7_1149200.1	0.759546	0.327239	0.992519	0.911977	0.625217	0.128286	0.878678	0.194446
transcript=PF3D7_1201000.1	0.928935	0.704252	1.07048	0.572498	0.975463	0.898051	0.985907	0.912241
transcript=PF3D7_1202100.1;transcript=PF3D7_1202100.2	0.999134	0.987709	0.965064	0.772766	1.0123	0.833677	1.01105	0.924584
transcript=PF3D7_1202600.1	1.0216	0.92788	0.928287	0.699705	1.12389	0.4732	0.85634	0.419809
transcript=PF3D7_1202900.1	0.773431	0.113678	0.885801	0.601674	0.54495	0.0353626	0.701853	0.110607
transcript=PF3D7_1203700.1	0.979732	0.758388	1.05517	0.463409	1.06709	0.463594	0.968033	0.537998
transcript=PF3D7_1203900.1	0.89176	0.723135	0.634565	0.0239299	0.732526	0.165967	0.730618	0.0949221
transcript=PF3D7_1204300.1	0.957566	0.792881	1.05369	0.562773	1.03602	0.743447	0.949639	0.478575
transcript=PF3D7_1205600.1	1.06786	0.491824	1.10355	0.239564	0.883157	0.418036	1.09058	0.374099
transcript=PF3D7_1205700.1	0.952488	0.489406	0.934202	0.389862	0.920884	0.488029	0.955849	0.582442
transcript=PF3D7_1205800.1	1.17367	0.321673	1.10344	0.391089	1.40622	0.094438	1.19878	0.324122
transcript=PF3D7_1205900.1	1.33995	0.0433324	1.20687	0.112451	1.29644	0.00443714	1.22081	0.104107
transcript=PF3D7_1206000.1	0.848314	0.63982	1.74882	0.206137	0.53042	0.153475	1.52873	0.469842
transcript=PF3D7_1206200.1	1.05168	0.58777	1.1148	0.177539	1.1176	0.30504	1.06684	0.328745
transcript=PF3D7_1206700.1	1.10368	0.140599	1.08562	0.69231	0.975518	0.902884	1.05608	0.794744
transcript=PF3D7_1207000.1	1.22165	0.232675	1.04199	0.657542	1.26857	0.12181	0.900688	0.340739
transcript=PF3D7_1208100.1	1.0055	0.876548	0.995582	0.955819	1.05849	0.517158	0.986325	0.87071
transcript=PF3D7_1208300.1	1.18709	0.243832	1.11093	0.375441	1.21654	0.100218	1.03775	0.802475
transcript=PF3D7_1208900.1	1.12403	0.178525	1.10191	0.0805238	1.10291	0.371388	1.01091	0.886704
transcript=PF3D7_1209000.1	1.12067	0.561275	1.08607	0.480638	1.29793	0.165864	0.997308	0.983091
transcript=PF3D7_1209200.1	0.730959	0.0518183	1.38001	0.000708656	0.69924	0.0455253	1.23686	0.0745906
transcript=PF3D7_1209400.1	1.39066	0.0311561	1.04697	0.653774	1.11449	0.395439	0.843789	0.156975
transcript=PF3D7_1210100.1	0.603154	0.312712	1.39799	0.368996	0.573836	0.285228	0.83601	0.637128
transcript=PF3D7_1210300.1	0.997769	0.957118	0.90137	0.63408	1.2124	0.0763618	0.694591	0.0466333
transcript=PF3D7_1210600.1	0.861294	0.408153	1.26178	0.133528	0.995862	0.97761	1.10125	0.459171
transcript=PF3D7_1211400.1	0.951012	0.695728	1.06474	0.604112	0.953165	0.643158	0.874624	0.270477
transcript=PF3D7_1211600.1	1.10507	0.665005	1.2324	0.361708	1.05112	0.828449	0.453976	0.0861216
transcript=PF3D7_1211700.1	1.32921	0.219713	0.884702	0.189572	0.796306	0.305741	0.833927	0.0599619
transcript=PF3D7_1211800.1;transcript=PF3D7_1365900.1	1.47081	0.0928804	0.970198	0.862337	1.31955	0.06673	0.887268	0.283446
transcript=PF3D7_1211900.1	0.969943	0.777482	1.02795	0.764428	1.04812	0.67252	0.94254	0.591393
transcript=PF3D7_1212000.1	0.898646	0.309449	1.07346	0.0630369	0.860423	0.405764	1.03616	0.366369
transcript=PF3D7_1212400.1	1.10292	0.196406	1.08578	0.52106	1.10878	0.143881	1.04178	0.698903
transcript=PF3D7_1212700.1	0.904671	0.131607	0.934339	0.295116	0.905926	0.137054	1.06458	0.449141
transcript=PF3D7_1212900.1	0.941311	0.635564	0.86838	0.758048	0.780261	0.131029	1.01795	0.946901
transcript=PF3D7_1213600.1	0.873383	0.207969	1.23985	0.36366	0.930199	0.329312	0.854546	0.603537
transcript=PF3D7_1213700.1	1.05584	0.740936	0.970245	0.80785	1.13521	0.274022	0.897427	0.298854
transcript=PF3D7_1213800.1	1.05955	0.640497	0.987325	0.915564	1.18447	0.531032	1.11368	0.49
transcript=PF3D7_1213900.1	1.07516	0.468308	1.40061	0.100737	1.05339	0.517547	1.24448	0.299496
transcript=PF3D7_1215000.1	0.424807	0.153792	1.14528	0.414158	0.419861	0.151814	1.07108	0.752382
transcript=PF3D7_1215100.1	0.662669	0.096299	0.878864	0.157167	0.483883	0.0890606	0.940499	0.348253
transcript=PF3D7_1215300.1	1.07334	0.435638	1.04913	0.667896	1.15796	0.322984	0.987834	0.931338
transcript=PF3D7_1215400.1	1.08374	0.320146	1.06533	0.663902	1.14589	0.262745	0.848648	0.234995
transcript=PF3D7_1216200.1	1.06506	0.284964	0.96094	0.459018	1.12796	0.104263	0.963204	0.516266
transcript=PF3D7_1216300.1	0.891853	0.743032	0.83058	0.0230187	0.704572	0.350542	0.967278	0.593758
transcript=PF3D7_1216500.1	1.12044	0.528731	0.876568	0.466078	1.02198	0.885529	0.81676	0.322066
transcript=PF3D7_1216900.1	1.01814	0.888133	0.85408	0.132345	0.996722	0.965249	0.971207	0.51105
transcript=PF3D7_1217200.1	0.79221	0.228403	1.19074	0.281061	0.872052	0.571491	0.780985	0.570906
transcript=PF3D7_1218400.1	0.85597	0.567159	0.856011	0.537556	0.616347	0.149462	1.08629	0.564871
transcript=PF3D7_1218500.1	0.904348	0.541289	0.954327	0.828916	0.683603	0.167434	1.18358	0.193551
transcript=PF3D7_1218600.1	0.950861	0.882137	0.779741	0.289089	0.724284	0.393897	0.836092	0.355083
transcript=PF3D7_1219100.1	0.992031	0.917716	1.11051	0.257579	0.900225	0.239676	0.993479	0.939392
transcript=PF3D7_1219900.1	1.20416	0.0745688	0.852978	0.591658	1.18747	0.149624	1.02507	0.835021
transcript=PF3D7_1220900.1	1.05061	0.408885	0.923872	0.286045	1.02365	0.653267	0.970604	0.658066
transcript=PF3D7_1221000.1	1.04174	0.550135	1.0943	0.264972	1.0949	0.3477	0.956059	0.549617
transcript=PF3D7_1222300.1	1.1511	0.113989	1.15014	0.0980785	1.19428	0.0357441	1.16939	0.0739752
transcript=PF3D7_1222700.1	1.43719	0.474049	2.06899	0.362006	1.07141	0.393524	1.97481	0.414656
transcript=PF3D7_1223100.1	1.00337	0.955211	0.999274	0.995546	1.06462	0.160508	1.09345	0.495074
transcript=PF3D7_1223200.1	1.64305	0.0721454	1.09826	0.365833	1.40177	0.405671	0.993312	0.959349
transcript=PF3D7_1223400.1	0.887721	0.410942	0.881501	0.375317	0.838341	0.477213	1.07257	0.742164
transcript=PF3D7_1224000.1	1.00754	0.865935	0.702772	0.0235157	1.07966	0.205843	0.659887	0.0175884
transcript=PF3D7_1224300.1	1.08293	0.563389	1.02058	0.711814	1.11121	0.316004	0.988274	0.799089
transcript=PF3D7_1224500.1	0.880597	0.187163	0.755916	0.35453	0.840337	0.164423	0.91262	0.0155829
transcript=PF3D7_1224900.1	0.865407	0.154683	1.1864	0.300507	0.856515	0.317507	1.02369	0.855415
transcript=PF3D7_1225200.1	1.13964	0.390178	0.949975	0.766751	1.11426	0.552857	0.959256	0.801014
transcript=PF3D7_1225600.1	1.79005	0.18637	0.956766	0.808587	2.12774	0.0533057	0.916594	0.598035
transcript=PF3D7_1225700.1	1.30905	0.252425	1.12387	0.217704	1.31102	0.221902	1.08004	0.219337
transcript=PF3D7_1225800.1	1.17151	0.0639209	0.96429	0.169956	1.14878	0.128488	1.04017	0.101065
transcript=PF3D7_1226300.1	0.964647	0.44612	1.05519	0.205231	1.01598	0.747211	1.03989	0.504317
transcript=PF3D7_1226400.1	1.27354	0.00820901	0.863678	0.114329	1.12277	0.100383	0.966912	0.710487
transcript=PF3D7_1226600.1	0.959759	0.751705	1.0231	0.318432	0.96073	0.732086	0.99788	0.943388
transcript=PF3D7_1226900.1	0.813135	0.596233	0.886295	0.414241	0.834563	0.661685	1.00124	0.986683
transcript=PF3D7_1227100.1	0.801166	0.331752	1.08622	0.156259	1.01329	0.965324	0.940122	0.148355
transcript=PF3D7_1227600.1	1.38058	0.0308958	1.05007	0.498064	1.38118	0.0514858	0.97225	0.808605
transcript=PF3D7_1227700.1	1.12703	0.288634	1.13779	0.150109	1.13081	0.191094	1.07579	0.337773
transcript=PF3D7_1227800.1	1.0816	0.269752	1.06202	0.346593	1.04648	0.439877	0.98113	0.836856
transcript=PF3D7_1228600.1	1.06223	0.419887	1.04736	0.408904	1.07149	0.377909	0.943443	0.331551
transcript=PF3D7_1228800.1	0.815897	0.166716	1.12738	0.30339	0.940455	0.465419	1.08367	0.484933
transcript=PF3D7_1229300.1	0.914107	0.204871	0.970195	0.127633	1.05067	0.415017	0.981686	0.614827
transcript=PF3D7_1229400.1	1.02023	0.742721	1.0997	0.162304	1.04695	0.600986	0.954011	0.358562
transcript=PF3D7_1229500.1	0.956505	0.778058	0.975656	0.876555	0.755628	0.0402029	0.917906	0.412995
transcript=PF3D7_1230400.1	0.516528	0.218013	1.0421	0.678378	0.540563	0.236205	0.940213	0.520803
transcript=PF3D7_1230700.1	0.965218	0.447415	0.833829	0.0303542	0.848124	0.0815512	0.88133	0.0294916
transcript=PF3D7_1230800.1	0.93731	0.557599	1.11745	0.214053	1.06259	0.665015	0.988669	0.885818
transcript=PF3D7_1231100.1	0.977258	0.750978	0.970843	0.704594	1.16916	0.359733	1.03532	0.338732
transcript=PF3D7_1231800.1	0.993697	0.933692	1.08708	0.280141	0.998003	0.981081	0.974931	0.786678
transcript=PF3D7_1232100.1	1.15158	0.113036	0.986406	0.702981	1.14679	0.0145413	1.0294	0.307852
transcript=PF3D7_1232200.1	1.04278	0.391821	1.10434	0.177653	1.05834	0.423876	1.05775	0.442282
transcript=PF3D7_1233600.1	1.17228	0.174299	1.20061	0.0818684	0.956969	0.687909	1.08221	0.364435
transcript=PF3D7_1233900.1	1.05555	0.807462	1.05231	0.810785	1.20089	0.680384	1.05802	0.685114
transcript=PF3D7_1234800.1	0.887822	0.579326	0.980223	0.783864	0.56162	0.114478	1.02855	0.765346
transcript=PF3D7_1234900.1	1.06498	0.347022	1.11985	0.482439	0.922702	0.27063	1.15298	0.361379
transcript=PF3D7_1235300.1	1.24619	0.0851525	1.00742	0.961913	1.32167	0.140759	0.895823	0.511289
transcript=PF3D7_1235600.1	0.802866	0.187375	0.899421	0.253194	0.842803	0.284861	1.08143	0.371943
transcript=PF3D7_1235700.1	0.878841	0.117672	0.868461	0.163523	1.00619	0.929152	0.823918	0.0757096
transcript=PF3D7_1236000.1	2.13137	0.0507931	1.45004	0.591572	2.32269	0.00431905	0.958606	0.94147
transcript=PF3D7_1236100.1	0.97255	0.872178	1.08176	0.352693	0.981981	0.879806	0.935929	0.410531
transcript=PF3D7_1237000.1	0.8239	0.188874	0.992496	0.945967	0.82901	0.272002	0.931124	0.390222
transcript=PF3D7_1237200.1	0.731951	0.0935891	1.10279	0.748043	0.826954	0.221048	1.5289	0.0674127
transcript=PF3D7_1237400.1	0.877707	0.410712	1.08183	0.769016	0.890824	0.574596	0.980582	0.912013
transcript=PF3D7_1237500.1	1.54161	0.285825	0.662109	0.405992	1.35202	0.36902	0.549508	0.127704
transcript=PF3D7_1237600.1	0.79974	0.232925	0.731856	0.105813	0.852997	0.461944	0.865556	0.205664
transcript=PF3D7_1237900.1	0.971831	0.806544	0.997442	0.983753	0.967644	0.744895	0.862442	0.186511
transcript=PF3D7_1238100.1	1.06179	0.538392	0.977956	0.760912	1.07869	0.33711	1.02488	0.716119
transcript=PF3D7_1238500.1	0.848315	0.240602	0.965617	0.777235	0.962847	0.611036	0.690595	5.19459e-05
transcript=PF3D7_1238800.1	1.06229	0.838507	0.900313	0.292748	0.866975	0.632822	1.03584	0.674564
Q14964	2.45321	0.0173087	1.60215	0.0064895	4.16141	0.00254843	2.38911	0.00398819
transcript=PF3D7_1239700.1	1.38892	0.0158058	1.06077	0.490373	1.41177	0.0124349	0.948468	0.546794
transcript=PF3D7_1239800.1	0.944181	0.732506	1.04519	0.722197	0.994929	0.974259	1.07979	0.431218
transcript=PF3D7_1241200.1	1.14868	0.232507	0.957338	0.769967	1.2568	0.205379	0.750138	0.146597
transcript=PF3D7_1241500.1	1.21141	0.19631	0.865315	0.323183	1.18717	0.507561	0.818758	0.229895
transcript=PF3D7_1241900.1	1.06578	0.60377	1.0496	0.679894	0.977472	0.866711	0.972864	0.817513
transcript=PF3D7_1242100.1	1.12066	0.618697	1.12329	0.628473	1.31535	0.537219	0.952223	0.83112
transcript=PF3D7_1242700.1	1.03021	0.603457	1.06786	0.164066	1.05546	0.482019	0.972356	0.64811
transcript=PF3D7_1242800.1	0.868459	0.594892	0.875381	0.59544	0.528743	0.0462117	1.05373	0.693869
transcript=PF3D7_1243600.1	1.03346	0.600852	0.829293	0.169217	0.973093	0.725585	0.741297	0.17234
transcript=PF3D7_1244100.1	0.84186	0.393471	0.831687	0.508475	0.663401	0.107443	0.852019	0.544969
transcript=PF3D7_1244600.1	1.72143	0.049304	0.95278	0.412771	1.93455	0.0203731	0.801206	0.00620134
transcript=PF3D7_1244800.1	1.10271	0.196759	1.09213	0.366827	1.14503	0.153716	0.944051	0.575149
transcript=PF3D7_1245100.1	1.55231	0.129233	0.998447	0.987433	1.29467	0.352882	0.964133	0.668166
transcript=PF3D7_1245900.1	1.38415	0.0106944	1.31335	0.447804	1.32677	0.0557416	0.427723	0.241439
transcript=PF3D7_1246200.1	1.04759	0.647966	1.04054	0.666004	1.12738	0.257914	0.950421	0.572391
transcript=PF3D7_1246300.1	1.05592	0.79968	0.858437	0.396666	0.996617	0.975147	0.672648	0.100486
transcript=PF3D7_1246400.1	0.922992	0.802484	1.15854	0.73207	0.935576	0.82089	0.950882	0.89209
transcript=PF3D7_1246800.1	1.39196	0.125808	1.36223	0.0940528	1.44192	0.249759	1.06496	0.764013
transcript=PF3D7_1247400.1	1.12587	0.238059	1.12676	0.119287	1.25556	0.0100419	1.05671	0.472822
transcript=PF3D7_1247900.1	1.21014	0.767895	1.0835	0.252393	2.02885	0.0824977	0.930921	0.30433
transcript=PF3D7_1248700.1	0.999361	0.994632	1.06508	0.440771	1.02289	0.834484	0.939647	0.400591
transcript=PF3D7_1248900.1	0.980665	0.439592	0.970615	0.367821	0.981594	0.43932	0.983661	0.651522
transcript=PF3D7_1249100.1	0.791256	0.0373309	0.699722	0.0532486	0.601663	0.00700071	0.808865	0.106662
transcript=PF3D7_1249300.1	0.926093	0.892283	0.706757	0.176889	0.59911	0.350327	0.920975	0.749631
transcript=PF3D7_1249800.1	0.860348	0.547257	0.445001	0.0297694	0.865127	0.534627	0.607851	0.112436
transcript=PF3D7_1250800.1	0.731603	0.167473	1.13331	0.369379	0.910974	0.690985	1.0983	0.369999
transcript=PF3D7_1251200.1	0.819688	0.151893	1.00662	0.905284	1.02745	0.637144	0.983343	0.773885
transcript=PF3D7_1251300.1	0.988226	0.817115	1.02464	0.856116	1.02453	0.47372	0.921755	0.627789
transcript=PF3D7_1252100.1	0.968558	0.862752	0.794523	0.167799	1.18118	0.155196	0.857616	0.224137
transcript=PF3D7_1253000.1	0.960136	0.919035	0.861041	0.52907	1.15225	0.672974	0.986419	0.825503
transcript=PF3D7_1253400.1	0.885566	0.342967	0.875507	0.50759	1.00739	0.934774	1.05766	0.746031
transcript=PF3D7_1301700.1	1.04837	0.813921	0.739838	0.386081	1.26723	0.0690013	0.820369	0.598926
transcript=PF3D7_1302000.1	1.06414	0.210651	0.985569	0.875127	1.02262	0.615463	1.0595	0.529669
transcript=PF3D7_1302100.1	0.886675	0.558982	0.902312	0.331112	0.61536	0.130914	0.8754	0.593557
transcript=PF3D7_1302700.1	1.04376	0.711272	0.919863	0.462264	1.02302	0.835979	0.885199	0.34804
transcript=PF3D7_1302800.1	1.16931	0.0266394	0.880934	0.149528	1.20585	0.0853464	0.995616	0.966646
transcript=PF3D7_1303200.1	0.789458	0.253489	1.12388	0.519246	0.999681	0.998623	1.05162	0.69913
transcript=PF3D7_1303400.1	1.1666	0.0964456	1.05837	0.3768	1.05078	0.656523	0.973571	0.653786
transcript=PF3D7_1303800.1	0.79887	0.547282	0.965827	0.86087	0.669365	0.357933	0.84879	0.489562
transcript=PF3D7_1304000.1	0.823722	0.0583772	0.99355	0.888046	0.870055	0.177428	0.967447	0.549471
transcript=PF3D7_1304400.1	1.0464	0.493891	0.705379	0.0483253	1.1549	0.232525	0.708224	0.096845
transcript=PF3D7_1304500.1	1.26785	0.244635	1.07638	0.412108	1.39265	0.0468646	0.970607	0.754195
transcript=PF3D7_1304900.1	0.741999	0.304446	1.10941	0.462745	0.633221	0.0498921	1.18848	0.129018
transcript=PF3D7_1305000.1	1.08469	0.507059	1.06335	0.215094	1.10577	0.292399	0.940804	0.426744
transcript=PF3D7_1305200.1	1.09381	0.506504	1.43883	0.247336	1.26328	0.0460807	1.273	0.439368
transcript=PF3D7_1305300.1	2.02054	0.0208672	0.998299	0.994406	3.60434	0.0830127	1.04664	0.85186
transcript=PF3D7_1305900.1	0.841652	0.353196	1.27341	0.221599	0.685914	0.0762398	1.11358	0.457573
transcript=PF3D7_1306400.1	1.19623	0.0435095	1.01767	0.843395	1.12032	0.0921962	1.07184	0.408101
transcript=PF3D7_1306600.1	1.09142	0.65587	0.965609	0.435056	1.06538	0.687274	1.03316	0.549852
transcript=PF3D7_1306900.1	0.993782	0.961464	1.08309	0.221549	0.896341	0.321179	0.932029	0.195016
transcript=PF3D7_1307200.1	1.18276	0.349436	0.765552	0.540286	1.06653	0.750442	1.12955	0.0774753
transcript=PF3D7_1307800.1	1.21593	0.293533	1.29547	0.221902	0.834081	0.638159	1.10926	0.634613
transcript=PF3D7_1308100.1	0.983176	0.947339	0.904011	0.590244	0.573272	0.124034	0.897628	0.50554
transcript=PF3D7_1308200.1	1.33717	0.000124835	1.11254	0.306276	1.4143	0.0327759	0.960171	0.479055
transcript=PF3D7_1308300.1	0.877922	0.335902	0.955128	0.783677	0.965752	0.779304	1.10689	0.539205
transcript=PF3D7_1308400.1	1.40972	0.036382	1.23427	0.257361	1.55104	0.0381401	1.27279	0.198346
transcript=PF3D7_1308900.1	1.07413	0.747157	0.629403	0.0366406	0.788667	0.336162	0.969339	0.871022
transcript=PF3D7_1309100.1	1.01865	0.810222	1.05035	0.0575326	1.0379	0.535708	0.996075	0.814675
transcript=PF3D7_1310300.1	1.1759	0.249737	0.984224	0.895721	1.17829	0.202656	0.956627	0.768235
transcript=PF3D7_1310600.1	1.00334	0.970686	0.895113	0.490666	1.31824	0.224064	0.776989	0.160571
transcript=PF3D7_1310800.1	0.557116	0.2695	0.995715	0.982637	0.901807	0.811787	1.11443	0.625828
transcript=PF3D7_1311000.1	1.07972	0.613819	1.00583	0.951017	1.07771	0.333355	0.912748	0.382923
transcript=PF3D7_1311200.1	1.08848	0.760774	0.71587	0.0109755	0.750272	0.236308	0.716357	0.0578111
transcript=PF3D7_1311500.1	1.10632	0.245947	0.964227	0.686175	1.21576	0.0260496	0.923083	0.38894
transcript=PF3D7_1311800.1	1.837	5.78073e-06	1.61498	0.00694349	3.49685	0.000994273	2.13115	0.028672
transcript=PF3D7_1311900.1	0.980633	0.682187	0.937617	0.405093	0.989964	0.85633	1.01236	0.745308
transcript=PF3D7_1312100.1	0.926241	0.658925	2.45061	0.0414555	0.930369	0.658749	1.17824	0.8319
transcript=PF3D7_1312600.1	1.58047	0.299354	0.886606	0.0573975	1.89757	0.383911	0.957997	0.316019
transcript=PF3D7_1312700.1	1.17777	0.214758	1.05378	0.508842	1.25522	0.0121614	0.942854	0.472776
transcript=PF3D7_1312900.1	1.03291	0.806157	1.09471	0.358828	1.29386	0.151954	1.08781	0.380401
transcript=PF3D7_1313700.1	1.187	0.470014	0.688193	0.068469	1.15055	0.585214	0.873826	0.381605
transcript=PF3D7_1314700.1	0.697185	0.0983837	0.867877	0.485937	0.937165	0.757056	0.943588	0.712171
transcript=PF3D7_1315500.1	0.867351	0.256423	0.876559	0.6266	0.934249	0.563125	1.71845	0.22718
transcript=PF3D7_1315900.1	1.23843	0.113099	1.34966	0.362421	1.46229	0.0433961	1.13247	0.718994
transcript=PF3D7_1316500.1	1.13486	0.0799827	1.02529	0.899222	1.0236	0.771354	1.35945	0.00831621
transcript=PF3D7_1316600.1	1.28124	0.221893	1.14708	0.641926	0.823214	0.409762	1.33931	0.294323
transcript=PF3D7_1316800.1	0.783868	0.126507	0.99287	0.971591	0.927421	0.478996	0.884634	0.432237
transcript=PF3D7_1317100.1	1.30784	0.00850215	1.08945	0.144934	1.27604	0.0609183	1.09148	0.156598
transcript=PF3D7_1317400.1	1.22009	0.0138152	1.06431	0.32521	1.30655	0.0624327	1.14884	0.308607
transcript=PF3D7_1317600.1	1.1968	0.478271	0.628229	0.0320345	1.00376	0.987895	0.680183	0.0521914
transcript=PF3D7_1317800.1	1.00644	0.950765	0.960899	0.806812	0.955942	0.695818	0.994551	0.981925
transcript=PF3D7_1318100.1	0.63349	0.109494	1.00574	0.966674	0.589516	0.0865632	1.0301	0.788237
transcript=PF3D7_1319300.1	1.1251	0.863826	1.23506	0.473219	1.65569	0.491373	1.12663	0.685336
transcript=PF3D7_1319400.1	0.795861	0.0531465	1.14211	0.426148	1.01112	0.785918	1.11843	0.0902679
transcript=PF3D7_1320600.1	1.01241	0.669705	0.950837	0.379158	0.980762	0.420581	0.966854	0.311558
transcript=PF3D7_1320800.1	0.724388	0.225169	1.17429	0.14152	0.666203	0.157337	1.16834	0.174088
transcript=PF3D7_1320900.1	1.06343	0.76195	1.38868	0.0735067	1.03155	0.851159	1.2537	0.245891
transcript=PF3D7_1321700.1	1.23844	0.0701897	1.08126	0.229745	1.21936	0.159405	0.937278	0.375756
transcript=PF3D7_1322000.1	0.931321	0.115296	0.958357	0.203699	0.916338	0.107257	0.971324	0.480527
transcript=PF3D7_1322200.1	0.98723	0.880228	1.046	0.65317	1.05696	0.757903	0.935384	0.705153
transcript=PF3D7_1323100.1	0.978838	0.692831	0.894114	0.105859	0.979234	0.655005	0.959219	0.475768
transcript=PF3D7_1323200.1	0.97188	0.825156	1.09697	0.359008	0.968154	0.716132	0.985193	0.877134
transcript=PF3D7_1323300.1	0.358204	0.240778	49.7876	0.391241	0.642062	0.504468	48.996	0.389803
transcript=PF3D7_1323400.1	1.15202	0.0211514	1.46649	0.0152363	1.10128	0.455693	1.30816	0.00267289
transcript=PF3D7_1323600.1	1.00773	0.877687	1.01795	0.752695	1.0782	0.338815	0.941306	0.33336
transcript=PF3D7_1324100.1	1.06967	0.576696	1.11579	0.234475	1.06938	0.520181	0.890166	0.321846
transcript=PF3D7_1324400.1	0.870253	0.74206	1.10305	0.449197	0.51936	0.180551	1.08953	0.59197
transcript=PF3D7_1324900.1	1.06011	0.820894	0.960997	0.781067	0.898022	0.56472	0.971809	0.863848
transcript=PF3D7_1325000.1	1.05495	0.526371	1.11499	0.114622	1.10675	0.323272	0.997657	0.973485
transcript=PF3D7_1325100.1	0.694047	0.200891	1.06173	0.475591	0.72624	0.272042	1.02133	0.802084
transcript=PF3D7_1325400.1	0.976248	0.885298	1.17796	0.0484914	1.08878	0.339298	1.01375	0.901026
transcript=PF3D7_1326100.1	0.902823	0.49649	1.146	0.419101	0.9185	0.622852	1.01171	0.91789
transcript=PF3D7_1327800.1	1.08977	0.265701	0.908059	0.142484	1.07253	0.395716	0.953831	0.451371
transcript=PF3D7_1328100.1	0.88394	0.0456743	0.908347	0.0302801	0.974864	0.694667	0.859007	0.00195741
transcript=PF3D7_1328300.1	1.11605	0.333704	1.20247	0.146962	1.1528	0.130571	1.07168	0.467689
transcript=PF3D7_1328500.1	0.982199	0.869602	1.02967	0.766229	0.954272	0.630942	0.976348	0.810262
transcript=PF3D7_1328900.1	1.30059	0.0362061	1.07412	0.71068	1.16797	0.289124	1.05956	0.704054
transcript=PF3D7_1329000.1	0.753392	0.109561	0.674273	0.210926	0.667081	0.157834	0.940377	0.672435
transcript=PF3D7_1329100.1	0.854698	0.181582	1.1846	0.153518	0.770745	0.12802	1.10627	0.362591
transcript=PF3D7_1329300.1	1.45846	0.352553	0.958112	0.612627	1.4817	0.322042	0.937728	0.440815
transcript=PF3D7_1329600.1	3.64773	0.360717	0.608527	0.289365	8.04304	0.0594419	1.03988	0.727912
transcript=PF3D7_1330300.1	1.11709	0.386845	0.963373	0.63338	1.03785	0.769532	0.940853	0.509939
transcript=PF3D7_1330600.1	0.740107	0.536623	0.934239	0.851917	0.476693	0.222671	0.708585	0.501401
transcript=PF3D7_1330800.1	0.926572	0.229648	1.00778	0.838078	0.881609	0.0563842	0.975297	0.523372
transcript=PF3D7_1331700.1	0.969984	0.731487	1.01854	0.73199	0.890991	0.186616	1.0811	0.0908296
transcript=PF3D7_1331800.1	0.906649	0.260017	1.01178	0.788572	0.918878	0.148804	0.902409	0.0968084
transcript=PF3D7_1332000.1	1.07542	0.411132	1.10587	0.132059	1.12854	0.0914438	0.982749	0.763061
transcript=PF3D7_1332200.1	0.99492	0.974632	1.03451	0.806079	1.0322	0.857837	1.01243	0.932222
transcript=PF3D7_1332600.1	0.957875	0.285966	1.09581	0.338057	0.846884	0.101675	1.11751	0.457332
transcript=PF3D7_1332800.1	0.969202	0.909524	0.787718	0.347618	0.72843	0.386673	0.980701	0.809548
transcript=PF3D7_1332900.1	0.941289	0.778259	0.785649	0.0668682	0.793179	0.297685	0.957682	0.713366
transcript=PF3D7_1333000.1	1.00444	0.966742	1.08683	0.320399	1.05348	0.637425	1.03139	0.733211
transcript=PF3D7_1333400.1	1.10646	0.644783	0.746717	0.142884	1.03401	0.901471	0.918794	0.560833
transcript=PF3D7_1333800.1	1.0133	0.890039	1.22378	0.0231374	0.958219	0.554766	0.975155	0.873909
transcript=PF3D7_1334100.1	0.882133	0.565833	1.26523	0.424129	1.09902	0.299455	1.5798	0.0635144
transcript=PF3D7_1334200.1	0.745862	0.0697951	1.11955	0.724232	0.813339	0.371875	0.917434	0.799423
transcript=PF3D7_1334500.1	0.991648	0.919013	1.00063	0.994751	1.08154	0.28425	1.00186	0.985185
transcript=PF3D7_1334700.1	1.04714	0.929694	3.12426	0.0947128	1.52293	0.248118	3.8931	1.79607e-06
transcript=PF3D7_1334800.1	1.13606	0.20255	1.06118	0.417072	1.21575	0.045625	0.942088	0.317408
transcript=PF3D7_1335100.1	0.947431	0.603006	1.14219	0.0317201	0.963281	0.730164	1.03798	0.518386
transcript=PF3D7_1335700.1	1.14147	0.265706	1.16516	0.237072	1.10854	0.229969	1.06429	0.63471
transcript=PF3D7_1336800.1	1.05761	0.218241	1.01494	0.723918	1.14554	0.0605393	1.02406	0.597819
transcript=PF3D7_1337200.1	1.06449	0.521397	0.800091	0.407055	1.31487	0.21411	1.12418	0.686092
transcript=PF3D7_1338100.1	0.838298	0.423609	0.644855	0.0209623	0.647241	0.0097484	1.02497	0.873882
transcript=PF3D7_1338200.1	0.932896	0.322774	0.927253	0.1916	0.787602	0.0172512	0.957126	0.603125
transcript=PF3D7_1338300.1	0.954698	0.656615	0.910945	0.353208	0.909708	0.411371	0.984397	0.857328
transcript=PF3D7_1338700.1	0.946156	0.62562	0.893272	0.812233	0.819621	0.246943	1.04954	0.89824
transcript=PF3D7_1339700.1	0.980325	0.890347	1.12625	0.395948	1.01671	0.845581	0.965756	0.802211
transcript=PF3D7_1340300.1	0.894574	0.564661	0.954666	0.635625	0.898271	0.350435	0.830511	0.0865354
transcript=PF3D7_1340600.1	0.982002	0.856951	1.02726	0.6539	1.05598	0.446717	0.96062	0.558399
transcript=PF3D7_1340700.1	1.03605	0.841792	1.01565	0.729269	1.11011	0.362234	0.865023	0.0105085
transcript=PF3D7_1340900.1	1.46358	0.517447	0.826604	0.565698	1.68787	0.367299	0.282579	0.0263976
transcript=PF3D7_1341200.1	0.801583	0.256608	0.779989	0.094665	0.67287	0.16826	0.929335	0.57254
transcript=PF3D7_1341300.1	0.898298	0.632082	0.773436	0.112846	0.77221	0.374593	0.964481	0.786575
transcript=PF3D7_1341900.1	0.988185	0.891668	1.22665	0.0152133	1.19257	0.209314	1.18189	0.0482645
transcript=PF3D7_1342000.1	1.06289	0.484705	1.05307	0.483065	1.07834	0.333567	0.95312	0.614246
transcript=PF3D7_1342100.1	1.07185	0.403594	1.13815	0.0196111	1.1243	0.458543	1.04198	0.25668
transcript=PF3D7_1342400.1	1.00858	0.911862	0.932988	0.218972	1.02048	0.748723	0.966557	0.492129
transcript=PF3D7_1342600.1	0.884391	0.567208	1.04812	0.555255	1.00848	0.97198	0.961665	0.58798
transcript=PF3D7_1342800.1	0.799009	0.357563	0.925062	0.427666	0.824748	0.461117	0.955621	0.588289
transcript=PF3D7_1343000.1	1.01435	0.846382	0.94291	0.218823	0.945506	0.249031	1.06121	0.223069
transcript=PF3D7_1343700.1	1.00527	0.938204	1.00552	0.947971	0.923904	0.410431	1.01934	0.659004
transcript=PF3D7_1343800.1	0.722728	0.29954	1.11107	0.290251	1.00796	0.951879	1.07253	0.5277
transcript=PF3D7_1343900.1	1.07758	0.473498	0.921669	0.665375	1.06696	0.269864	1.26058	0.117274
transcript=PF3D7_1344200.1	1.06765	0.136129	0.930836	0.361338	1.07554	0.156332	0.989605	0.890512
transcript=PF3D7_1344900.1	1.01449	0.961484	0.655156	0.126602	0.764152	0.487756	0.595124	0.0908316
transcript=PF3D7_1345100.1	1.16057	0.0262518	0.972736	0.678506	1.12299	0.115764	0.984659	0.785469
transcript=PF3D7_1345400.1	1.21618	0.509296	1.11974	0.5317	0.778081	0.612558	1.0985	0.660624
transcript=PF3D7_1345700.1	1.01302	0.844945	1.0498	0.60098	0.73217	0.0103841	1.11291	0.117187
transcript=PF3D7_1345900.1	1.02692	0.927439	1.06726	0.761043	1.18718	0.489379	1.09858	0.497335
transcript=PF3D7_1346300.1	0.828606	0.275086	1.10961	0.0124854	0.834777	0.318876	1.03758	0.542011
transcript=PF3D7_1346400.1	0.774695	0.546575	1.53714	0.156593	1.36181	0.353079	0.78609	0.632769
transcript=PF3D7_1347200.1	1.04341	0.935753	1.1325	0.82922	0.85439	0.783342	1.00508	0.992568
transcript=PF3D7_1347500.1	0.815937	0.200077	0.824763	0.0966983	0.74099	0.159188	0.971475	0.772932
transcript=PF3D7_1347700.1	0.868911	0.696716	1.15331	0.281551	0.801252	0.551714	1.19519	0.216335
transcript=PF3D7_1349200.1	0.924624	0.498595	0.921472	0.249125	0.913328	0.396586	0.931244	0.453631
transcript=PF3D7_1349500.1	1.30075	0.155959	0.956214	0.617073	1.07235	0.472812	0.882113	0.0489509
transcript=PF3D7_1350100.1	1.1295	0.141403	0.799385	0.0046068	1.09523	0.0570342	0.891522	0.179119
transcript=PF3D7_1351000.1	0.736244	0.156301	0.969443	0.702431	0.928443	0.64168	0.906276	0.381582
transcript=PF3D7_1351100.1	1.01624	0.945454	1.11946	0.431032	1.22273	0.466701	1.04228	0.485197
transcript=PF3D7_1351400.1	0.896558	0.38186	0.854744	0.431716	0.767567	0.12114	0.885594	0.533211
transcript=PF3D7_1351700.1	1.02603	0.822091	0.640853	0.171071	1.01036	0.920244	0.518787	0.153082
transcript=PF3D7_1351800.1;transcript=PF3D7_1351800.2	0.999649	0.996662	1.15304	0.0356712	1.05273	0.516437	1.03041	0.699341
transcript=PF3D7_1352500.1	0.718211	0.206659	1.09804	0.685577	0.732157	0.225053	1.16717	0.389351
transcript=PF3D7_1352700.1	1.03149	0.95996	1.04661	0.738454	1.00759	0.990288	1.09484	0.501551
transcript=PF3D7_1352800.1	1.01908	0.907617	1.05828	0.536358	1.08902	0.477502	0.920938	0.378681
transcript=PF3D7_1353000.1	0.63969	0.142635	1.03662	0.770608	0.806385	0.0325784	0.970044	0.654286
transcript=PF3D7_1353100.1	0.733133	0.272378	0.926645	0.654476	0.70174	0.226147	0.862309	0.456631
transcript=PF3D7_1353300.1	0.695038	0.145964	1.37163	0.0217418	0.821791	0.202044	1.24452	0.042547
transcript=PF3D7_1353700.1	0.922434	0.718626	0.71423	0.459088	1.10458	0.727782	0.509319	0.192806
transcript=PF3D7_1353800.1	0.958757	0.375545	0.970331	0.662298	1.18307	0.250638	0.903181	0.106985
transcript=PF3D7_1353900.1	0.849021	0.0306726	0.947341	0.506498	0.956874	0.470225	0.910993	0.131823
transcript=PF3D7_1354300.1	0.981667	0.834246	1.11404	0.115536	1.01214	0.871389	1.07263	0.274024
transcript=PF3D7_1354500.1	1.02485	0.893438	0.763601	0.0780137	0.893889	0.623819	0.870499	0.355849
transcript=PF3D7_1354600.1	0.735224	0.356939	0.571305	0.0578725	0.899673	0.721796	0.831469	0.242011
transcript=PF3D7_1354900.1	1.08553	0.464434	1.21094	0.00904225	1.0985	0.435979	1.19266	0.189682
transcript=PF3D7_1355100.1	0.929463	0.588026	1.13502	0.0825695	1.02849	0.770534	1.01795	0.810681
transcript=PF3D7_1355500.1	0.924538	0.136925	1.12166	0.0510345	0.947894	0.223293	1.12382	0.0331612
transcript=PF3D7_1355700.1	0.926265	0.520712	0.763028	0.0960043	0.915694	0.595364	0.909597	0.52989
transcript=PF3D7_1355800.1	1.08802	0.59048	0.691967	0.152049	1.42057	0.0765257	0.982319	0.759116
transcript=PF3D7_1356300.1	0.988617	0.937242	0.834429	0.345909	1.05555	0.458475	1.0726	0.034528
transcript=PF3D7_1356800.1	0.707466	0.0040115	0.936766	0.306779	0.785226	0.0551256	0.921075	0.233311
transcript=PF3D7_1357000.1;transcript=PF3D7_1357100.1	1.05305	0.123512	1.03156	0.602776	1.05789	0.0711391	1.06953	0.057521
transcript=PF3D7_1357500.1	1.03563	0.287608	0.798423	0.367727	0.995182	0.958808	0.498721	0.0487173
transcript=PF3D7_1357700.1	0.93048	0.74883	0.828202	0.162677	1.22411	0.0805853	1.00152	0.981577
transcript=PF3D7_1357800.1	0.998867	0.991096	1.00063	0.989792	0.970208	0.685944	0.945661	0.236508
transcript=PF3D7_1357900.1	0.987561	0.791125	0.94207	0.411203	1.07793	0.357248	0.891514	0.0838881
transcript=PF3D7_1358000.1	1.15715	0.507637	1.2801	0.398422	1.27474	0.437527	1.05419	0.70771
transcript=PF3D7_1358100.1	1.18119	0.332103	1.07128	0.559721	1.1541	0.0758451	1.03171	0.765497
transcript=PF3D7_1358800.1	1.20989	0.0733561	1.08096	0.00830534	1.24781	0.0386936	1.05821	0.0438477
transcript=PF3D7_1358900.1	1.56577	0.397682	0.70833	0.283798	1.18609	0.690887	0.607511	0.133124
transcript=PF3D7_1359400.1	1.2081	0.0967819	1.07011	0.324902	1.17477	0.0806398	0.960583	0.548728
transcript=PF3D7_1359600.1	0.848133	0.554924	0.847968	0.424358	1.01503	0.873836	0.82964	0.200888
transcript=PF3D7_1360100.1	0.97161	0.868783	1.06647	0.763334	1.10304	0.41759	0.923335	0.691957
transcript=PF3D7_1360700.1	1.12864	0.275784	1.22824	0.154094	0.996346	0.974219	1.13527	0.482615
transcript=PF3D7_1360800.1	0.851919	0.170444	0.924109	0.256938	0.829137	0.0803145	1.02023	0.696373
transcript=PF3D7_1360900.1	1.03241	0.876548	0.866496	0.283285	1.01363	0.940581	1.33505	0.143823
transcript=PF3D7_1361100.1	0.943988	0.927909	0.998645	0.997995	0.98814	0.983869	1.49262	0.272527
transcript=PF3D7_1361800.1	0.909807	0.31702	0.886295	0.462558	0.948649	0.363121	0.902628	0.497087
transcript=PF3D7_1361900.1	0.933587	0.434274	1.28963	0.143076	0.909621	0.416023	1.23314	0.122827
transcript=PF3D7_1362200.1	1.09327	0.171164	0.941665	0.453046	1.05173	0.408032	1.02276	0.611252
transcript=PF3D7_1363400.1	1.02179	0.811411	0.831068	0.362735	1.08147	0.797379	0.971102	0.840419
transcript=PF3D7_1364100.1	1.01644	0.839239	1.01259	0.878611	1.0328	0.776804	1.02043	0.760011
transcript=PF3D7_1364200.1	1.12668	0.506243	0.826767	0.684126	1.25348	0.015785	0.619176	0.368297
transcript=PF3D7_1364400.1	1.37859	0.413297	0.81465	0.581128	2.10834	0.128436	0.279987	0.0197339
transcript=PF3D7_1364500.1	0.75927	0.485363	1.0203	0.804978	0.765242	0.499403	0.967484	0.688644
transcript=PF3D7_1365700.1	0.833167	0.627697	0.963058	0.904473	0.526314	0.0675545	0.603483	0.325401
transcript=PF3D7_1366000.1	1.10377	0.429363	1.10219	0.186424	1.02043	0.860016	0.937557	0.315403
transcript=PF3D7_1366300.1	0.879741	0.508434	1.58076	0.161674	1.14463	0.198703	1.60035	0.0311952
transcript=PF3D7_1366400.1	0.741531	0.41324	2.28372	0.0724326	0.620077	0.0595774	2.07225	0.140964
transcript=PF3D7_1366500.1	1.19963	0.0402025	1.0015	0.987506	1.31158	0.00817699	0.910864	0.264556
transcript=PF3D7_1366600.1	1.38988	0.0278205	0.824355	0.067856	1.11448	0.642626	0.979064	0.867559
transcript=PF3D7_1366900.1	1.07073	0.483774	1.03344	0.762089	1.05976	0.566054	0.932387	0.525576
transcript=PF3D7_1367000.1	1.09579	0.0853097	1.04596	0.678712	1.10243	0.321629	0.982223	0.89321
transcript=PF3D7_1367600.1	0.875145	0.33373	0.639629	0.154354	0.738959	0.0847563	0.92012	0.754138
transcript=PF3D7_1367700.1	0.736936	0.0783948	1.05379	0.553792	0.799062	0.225087	1.14964	0.150011
transcript=PF3D7_1368100.1	1.06648	0.495294	1.12252	0.0853821	1.10004	0.138086	1.11003	0.0652126
transcript=PF3D7_1368200.1	0.672779	0.125004	0.883279	0.469142	0.615903	0.025606	1.08691	0.578029
transcript=PF3D7_1368300.1	1.74061	0.181422	1.68828	0.069732	1.07355	0.571485	1.73524	0.0584355
transcript=PF3D7_1368600.1	1.06639	0.656656	1.13442	0.124793	1.09489	0.512098	0.926991	0.17416
transcript=PF3D7_1368900.1	0.874155	0.248654	1.04798	0.661991	0.776482	0.447129	0.959395	0.714546
transcript=PF3D7_1369500.1	1.55948	0.195124	0.868184	0.0408273	0.840414	0.38315	0.979007	0.749627
transcript=PF3D7_1369700.1	0.978954	0.839616	0.970616	0.429728	1.00003	0.99983	1.04351	0.62282
transcript=PF3D7_1372000.1	1.04523	0.430738	1.05929	0.0581515	1.06883	0.341167	0.989048	0.781545
transcript=PF3D7_1401100.1	1.40297	0.162036	1.00823	0.969402	1.56173	0.0721217	1.18646	0.294238
transcript=PF3D7_1401600.1	0.719435	0.0464608	1.02917	0.909659	0.828863	0.20017	0.910343	0.404854
transcript=PF3D7_1401800.1	1.35369	0.644126	1.52076	0.42511	1.26494	0.706067	1.48644	0.292976
transcript=PF3D7_1402300.1	1.03029	0.893186	0.935705	0.399844	1.20654	0.279103	1.04788	0.286379
transcript=PF3D7_1402500.1	1.00954	0.868583	0.839536	0.276527	0.987159	0.93061	0.776627	0.177175
transcript=PF3D7_1404100.1	0.89821	0.294515	1.04603	0.318502	0.849559	0.0925851	1.03921	0.45597
transcript=PF3D7_1404900.1	1.30741	0.280483	1.04118	0.648028	1.4347	0.0516302	0.953051	0.629371
transcript=PF3D7_1405600.1	0.91163	0.171558	1.07239	0.307467	0.962952	0.570653	1.01044	0.878104
transcript=PF3D7_1405800.1	1.06844	0.747844	1.12863	0.285305	0.924734	0.61441	0.986387	0.913633
transcript=PF3D7_1406200.1	1.04503	0.696775	0.878987	0.391388	1.02267	0.81281	0.809537	0.0755323
transcript=PF3D7_1406300.1	1.23414	0.00639445	1.13605	0.0800613	1.05904	0.56599	1.06825	0.401086
transcript=PF3D7_1406600.1	1.42673	0.232981	0.801517	0.298216	0.941138	0.495611	1.08275	0.327783
transcript=PF3D7_1407100.1	1.00782	0.932791	0.796181	0.0181712	0.949261	0.630346	0.874075	0.037279
transcript=PF3D7_1407200.1	0.828912	0.512788	1.08379	0.784961	1.10887	0.577808	0.829527	0.577319
transcript=PF3D7_1407500.1	1.1247	0.0523223	0.967143	0.636478	1.07428	0.288006	0.896027	0.172072
transcript=PF3D7_1407800.1	0.888724	0.104849	1.00453	0.944002	0.88711	0.162329	1.01921	0.763813
transcript=PF3D7_1407900.1	0.950049	0.695613	0.923311	0.151849	0.898146	0.507747	0.965138	0.496915
transcript=PF3D7_1408000.1	0.959268	0.762747	0.909143	0.391165	0.838729	0.184172	1.00151	0.981023
transcript=PF3D7_1408100.1	1.028	0.570073	0.909582	0.0546707	0.962939	0.321454	0.902441	0.0654738
transcript=PF3D7_1408600.1	1.06831	0.602962	0.954638	0.579098	1.0125	0.924168	0.998699	0.98169
transcript=PF3D7_1409300.1	0.976935	0.84429	1.04066	0.683329	1.03894	0.770532	0.841246	0.527481
transcript=PF3D7_1409600.1	1.04453	0.645902	0.929363	0.662219	1.04534	0.536403	0.96852	0.850701
transcript=PF3D7_1409800.1	1.01838	0.547111	0.989975	0.700432	0.976236	0.652639	0.967403	0.385825
transcript=PF3D7_1409900.1	0.97855	0.903863	1.83536	0.0471693	0.716635	0.438188	1.56487	0.127613
transcript=PF3D7_1410200.1	1.09885	0.253652	0.895684	0.355877	1.06038	0.456174	1.01635	0.855687
transcript=PF3D7_1410400.1	1.27966	0.00691432	1.07616	0.326313	1.29171	0.0429776	0.988459	0.890826
transcript=PF3D7_1410600.1	1.00012	0.998099	0.99217	0.879135	1.10404	0.0194141	0.991349	0.710923
transcript=PF3D7_1410700.1	1.18893	0.675093	1.0448	0.505326	2.05336	0.0693664	1.05456	0.298885
transcript=PF3D7_1410900.1	0.929865	0.587721	1.26932	0.382493	0.990741	0.932453	0.945541	0.854769
transcript=PF3D7_1412100.1	1.15271	0.0848849	0.904212	0.338754	1.18826	0.00483712	0.848426	0.241049
transcript=PF3D7_1412300.1	0.931719	0.387415	1.03482	0.763561	1.01974	0.790031	0.918295	0.366549
transcript=PF3D7_1412500.1	0.849983	0.502497	1.06687	0.284773	1.05425	0.631512	0.973329	0.7227
transcript=PF3D7_1412600.1	1.0821	0.480174	1.06773	0.448825	1.00313	0.977676	1.09698	0.204223
transcript=PF3D7_1414000.1	1.00064	0.995168	1.05725	0.791423	0.85527	0.504431	0.713671	0.21528
transcript=PF3D7_1414100.1	1.42668	0.237294	1.40659	0.171999	1.502	0.138166	1.19528	0.461885
transcript=PF3D7_1414300.1	1.03893	0.876758	0.973158	0.527914	0.993688	0.975862	1.00494	0.936868
transcript=PF3D7_1414400.1	0.944245	0.444076	1.07462	0.0936628	0.880313	0.329036	1.04273	0.689581
transcript=PF3D7_1414800.1	0.895848	0.0809331	0.909386	0.239089	0.983691	0.854019	0.902234	0.216173
transcript=PF3D7_1415300.1	1.07671	0.442852	0.931159	0.373307	0.941718	0.490761	1.04519	0.418291
transcript=PF3D7_1415400.1	1.08066	0.506263	1.0534	0.579242	1.20254	0.151407	0.928772	0.401196
transcript=PF3D7_1416500.1	1.10187	0.0904679	1.1875	0.225133	1.1248	0.194247	1.2688	0.0201401
transcript=PF3D7_1416900.1	1.03924	0.647735	1.04846	0.673524	1.12267	0.316087	0.967503	0.742801
transcript=PF3D7_1417200.1	1.04863	0.643996	1.00077	0.990074	1.11779	0.19805	1.04131	0.51962
transcript=PF3D7_1417500.1	0.874101	0.630518	0.873874	0.366246	0.801238	0.423883	0.984445	0.896512
transcript=PF3D7_1417700.1	1.1806	0.544245	1.12273	0.654803	1.03564	0.950347	0.977946	0.91594
transcript=PF3D7_1417800.1	0.907019	0.671722	1.02692	0.894227	0.976007	0.93193	0.879174	0.611508
transcript=PF3D7_1417900.1	1.17674	0.150281	1.63636	0.109852	1.13626	0.0730392	1.05966	0.70976
transcript=PF3D7_1418000.1	1.45537	0.0734899	1.25918	0.0518778	1.16174	0.654011	1.00782	0.882109
transcript=PF3D7_1418200.1	1.01455	0.911484	1.2156	0.680737	1.02554	0.835178	0.878253	0.688903
transcript=PF3D7_1419000.1	0.98148	0.923423	1.01265	0.935135	1.1612	0.122134	0.892355	0.554231
transcript=PF3D7_1419300.1	0.913359	0.488805	0.886113	0.180016	0.93984	0.63019	0.981277	0.764281
transcript=PF3D7_1419400.1	1.15525	0.219029	1.04628	0.600428	1.06559	0.574564	0.92864	0.372902
transcript=PF3D7_1419600.1	1.29656	0.0677512	0.707052	0.0159659	1.24509	0.218878	0.862471	0.170588
transcript=PF3D7_1419700.1	1.17498	0.084773	0.916974	0.339972	1.1255	0.143751	1.04902	0.31984
transcript=PF3D7_1419800.1;transcript=PF3D7_1419800.2	0.85618	0.322347	0.98002	0.820094	0.951643	0.722662	1.03748	0.665187
transcript=PF3D7_1420400.1	1.07214	0.308911	1.10538	0.205421	0.9967	0.964604	1.12204	0.26789
transcript=PF3D7_1420600.1	1.02508	0.892699	0.736496	0.0421629	0.964812	0.81544	1.29704	0.0331754
transcript=PF3D7_1420700.1	1.01632	0.498032	0.962796	0.67691	1.01542	0.702754	1.07574	0.106235
transcript=PF3D7_1421200.1	1.0109	0.838837	1.23972	0.0115352	1.06263	0.537442	1.16477	0.0431786
transcript=PF3D7_1422400.1	0.92827	0.65056	0.57176	0.282082	0.743442	0.134389	0.72637	0.466217
transcript=PF3D7_1422700.1	1.19424	0.304946	1.05376	0.207928	1.25486	0.23631	0.978294	0.802913
transcript=PF3D7_1422800.1	1.21654	0.843181	0.764962	0.343041	2.45546	0.138295	0.789987	0.427756
transcript=PF3D7_1423700.1	1.06125	0.583399	1.07884	0.481203	1.08315	0.272766	0.995859	0.967399
transcript=PF3D7_1424100.1	0.928355	0.048064	0.847962	0.0692154	0.886043	0.153975	0.931239	0.414636
transcript=PF3D7_1424400.1	0.869569	0.0507511	0.936317	0.482306	0.780204	0.0186429	1.01515	0.850212
transcript=PF3D7_1425200.1	1.14319	0.558871	0.963891	0.745464	0.919011	0.474135	1.02748	0.831782
transcript=PF3D7_1425900.1	0.939047	0.774869	1.03393	0.710495	0.921243	0.563735	1.0482	0.349291
transcript=PF3D7_1426000.1	1.13421	0.591512	1.10049	0.503866	1.36358	0.113312	1.19355	0.377092
transcript=PF3D7_1426100.1	0.992109	0.914641	1.06262	0.511435	0.982898	0.758672	0.9204	0.458233
transcript=PF3D7_1426200.1	0.990296	0.957998	0.898724	0.284542	0.95701	0.700483	0.990421	0.81801
transcript=PF3D7_1427300.1	1.03073	0.540146	1.11853	0.228421	0.95701	0.480836	1.09856	0.370274
transcript=PF3D7_1427500.1	1.01231	0.896102	0.83782	0.0424974	1.00189	0.985052	1.02236	0.766596
transcript=PF3D7_1427900.1	1.08013	0.133472	1.13968	0.290645	1.16684	0.0989056	1.02873	0.69423
transcript=PF3D7_1428100.1	0.951419	0.786471	0.985911	0.948201	0.773241	0.137302	1.14193	0.575666
transcript=PF3D7_1428300.1	0.996046	0.976057	1.09499	0.242201	1.10241	0.408841	1.1283	0.116009
transcript=PF3D7_1429400.1	0.650675	0.249261	0.944921	0.811239	0.846221	0.587349	0.841334	0.411603
transcript=PF3D7_1429600.1	0.823539	0.601603	1.06686	0.777232	0.881766	0.519973	0.921938	0.767321
transcript=PF3D7_1429800.1	1.14205	0.362718	1.24627	0.309131	1.23312	0.200839	1.32941	0.194118
transcript=PF3D7_1429900.1	1.08471	0.524289	0.987248	0.950738	1.09911	0.285753	0.918656	0.664412
transcript=PF3D7_1430300.1	1.13282	0.614007	0.74179	0.351485	1.23769	0.371582	0.542585	0.029907
transcript=PF3D7_1430700.1	0.964855	0.847906	0.979249	0.815934	0.651791	0.129625	0.780766	0.239025
transcript=PF3D7_1431600.1	1.09687	0.482308	1.05176	0.25673	1.0287	0.81297	1.04837	0.238765
transcript=PF3D7_1431700.1	0.699548	0.150749	0.77688	0.145933	0.69495	0.230214	0.915952	0.465841
transcript=PF3D7_1432100.1	0.173673	0.291247	0.946639	0.513798	0.523942	0.549359	0.771834	0.0526053
transcript=PF3D7_1432800.1	0.861344	0.541149	1.10029	0.0986124	1.1339	0.598147	1.05854	0.354877
transcript=PF3D7_1433000.1	1.1793	0.431024	1.01251	0.94203	0.817658	0.25667	1.12506	0.4224
transcript=PF3D7_1433500.1	1.07048	0.0775001	1.07	0.315725	1.09949	0.0688943	0.971385	0.475378
transcript=PF3D7_1434200.1	1.12209	0.242508	1.03304	0.768789	1.13498	0.226057	0.91884	0.456632
transcript=PF3D7_1434300.1	0.99985	0.998948	1.18665	0.0650779	1.08556	0.403334	1.07073	0.406584
transcript=PF3D7_1434600.1	1.02051	0.634854	1.05456	0.241236	1.0126	0.881679	0.964655	0.194631
transcript=PF3D7_1434800.1	0.967622	0.837672	1.03216	0.72019	0.957588	0.617568	0.904752	0.236542
transcript=PF3D7_1435400.1	1.20688	0.229231	0.975384	0.813474	1.13628	0.233134	0.936657	0.488065
transcript=PF3D7_1435500.1	0.946223	0.818723	1.17424	0.396931	1.08295	0.60255	1.1047	0.585875
transcript=PF3D7_1435700.1;transcript=PF3D7_1435700.2	1.02269	0.89101	1.13672	0.0597768	0.901481	0.579759	1.0676	0.354165
transcript=PF3D7_1436000.1	0.878586	0.217179	1.09524	0.543124	0.854668	0.137547	1.18571	0.0566245
transcript=PF3D7_1436200.1	1.38805	0.143014	1.19233	0.395214	1.58392	0.28207	1.15571	0.371171
transcript=PF3D7_1436300.1	1.07427	0.440201	1.12721	0.0295791	1.07857	0.334014	1.02762	0.700038
transcript=PF3D7_1437000.1	1.01323	0.835165	1.04648	0.661809	0.997765	0.978957	0.921461	0.401767
transcript=PF3D7_1437200.1	1.12096	0.290485	1.04082	0.132762	1.13035	0.353958	0.970017	0.747172
transcript=PF3D7_1437500.1	1.21138	0.616932	0.891575	0.207349	0.898316	0.466916	1.05208	0.728518
transcript=PF3D7_1437800.1	0.265635	0.00478974	0.856696	0.857021	0.276518	0.00462997	0.319925	0.37349
transcript=PF3D7_1437900.1	1.04867	0.60591	0.960453	0.378698	1.04696	0.406469	0.940028	0.0853056
transcript=PF3D7_1438000.1	1.26753	0.0733431	0.702903	0.112697	1.26331	0.176705	1.02364	0.851163
transcript=PF3D7_1438400.1	0.909105	0.485849	0.987748	0.957721	1.08075	0.755281	0.769576	0.194234
transcript=PF3D7_1438500.1	1.04232	0.757649	0.9404	0.491096	1.21936	0.0637264	0.939952	0.423754
transcript=PF3D7_1438900.1	0.924341	0.0354658	0.987233	0.669308	1.04901	0.0782907	0.980351	0.523544
transcript=PF3D7_1439400.1	1.06651	0.786926	0.731936	0.657346	1.39208	0.189644	0.898401	0.854449
transcript=PF3D7_1439800.1	1.04874	0.293244	1.08149	0.249405	1.03097	0.577284	0.988036	0.873246
transcript=PF3D7_1439900.1	0.904612	0.304428	1.00459	0.923551	0.865429	0.0419564	1.01019	0.710502
transcript=PF3D7_1440100.1	1.44153	0.123697	0.869501	0.614784	1.14655	0.636575	1.12928	0.476052
transcript=PF3D7_1440500.1	0.934078	0.679521	1.26943	0.274291	0.952312	0.450578	0.81476	0.504028
transcript=PF3D7_1441100.1	1.59389	0.351337	0.832622	0.724009	1.42435	0.435206	1.10318	0.793138
transcript=PF3D7_1441200.1	0.8305	0.354488	0.817174	0.153451	0.77503	0.328596	0.974143	0.801447
transcript=PF3D7_1441400.1	1.08743	0.324364	1.01196	0.792671	1.02392	0.751015	0.968988	0.478834
transcript=PF3D7_1442100.1	0.949332	0.744322	0.981866	0.843528	0.896352	0.328955	0.931433	0.583725
transcript=PF3D7_1442300.1	1.12437	0.0130819	0.981006	0.660734	1.07021	0.212333	1.03169	0.547199
transcript=PF3D7_1442900.1	1.05465	0.499974	0.999709	0.997354	1.07499	0.389736	0.976628	0.766322
transcript=PF3D7_1443000.1	0.822786	0.41545	1.60866	0.0939931	0.902114	0.557744	1.66269	0.202148
transcript=PF3D7_1443400.1	0.931318	0.789347	0.803688	0.321355	0.779304	0.481528	0.914318	0.587051
transcript=PF3D7_1443800.1	0.945317	0.583936	1.08924	0.607408	1.22726	0.0736849	0.933823	0.700794
transcript=PF3D7_1443900.1	0.988898	0.911951	1.07719	0.0839346	0.98528	0.882717	1.04323	0.432435
transcript=PF3D7_1444800.1	1.00302	0.944862	1.0127	0.844065	1.01352	0.822588	0.955218	0.405966
transcript=PF3D7_1445100.1	1.04896	0.757437	0.881595	0.405638	1.16956	0.213412	1.00066	0.99444
transcript=PF3D7_1445200.1	0.736286	0.516686	1.34394	0.411021	0.73395	0.518127	1.57481	0.0921383
transcript=PF3D7_1445700.1	1.07078	0.396422	1.03458	0.831427	1.27591	0.105282	0.866952	0.391956
transcript=PF3D7_1445900.1	1.12054	0.0110235	0.948951	0.426789	1.03033	0.779632	1.04401	0.44614
transcript=PF3D7_1446200.1	1.1275	0.151324	1.14427	0.174889	1.24137	0.0831574	1.10644	0.118058
transcript=PF3D7_1446600.1	1.22056	0.1424	1.04993	0.678757	1.11317	0.363899	0.957231	0.728216
transcript=PF3D7_1446700.1	1.0461	0.735205	1.16453	0.202112	1.09049	0.599415	1.20771	0.148604
transcript=PF3D7_1447000.1	0.815349	0.368396	0.816872	0.163317	0.725813	0.231954	0.908622	0.359418
transcript=PF3D7_1447200.1	0.945868	0.653166	1.03963	0.572212	1.11106	0.330245	0.987396	0.860458
transcript=PF3D7_1447800.1	1.35062	0.562414	0.959428	0.781966	0.932739	0.869078	0.864555	0.293297
transcript=PF3D7_1447900.1	1.0392	0.67688	1.1092	0.235874	1.02747	0.691652	0.980935	0.856775
transcript=PF3D7_1448300.1	0.876117	0.5917	1.15775	0.293584	1.05265	0.831533	0.986667	0.921975
transcript=PF3D7_1448600.1	1.07096	0.302213	1.01576	0.890094	1.06554	0.484445	0.939703	0.497568
transcript=PF3D7_1449500.1	1.13514	0.168797	1.11208	0.266966	1.13544	0.152146	1.00747	0.930138
transcript=PF3D7_1450100.1	0.85395	0.568209	0.779808	0.363332	0.910485	0.604182	0.936433	0.716614
transcript=PF3D7_1450500.1	1.13262	0.0440002	1.0054	0.941002	1.14144	0.104731	1.02404	0.641097
transcript=PF3D7_1450700.1	0.395501	0.456237	0.702843	0.233838	0.406158	0.463285	0.70029	0.0298931
transcript=PF3D7_1451100.1	0.996863	0.916378	0.893844	0.0255002	0.98742	0.813409	0.970123	0.440699
transcript=PF3D7_1451200.1	1.12599	0.401437	1.1266	0.252186	1.11332	0.22599	0.996009	0.970287
transcript=PF3D7_1451500.1	0.527231	0.0847176	1.09021	0.221114	0.830956	0.40725	1.25737	0.0211735
transcript=PF3D7_1451800.1	1.09899	0.736228	1.11344	0.296291	1.09418	0.348371	1.06409	0.55856
transcript=PF3D7_1452000.1	1.36639	0.408977	1.00499	0.962662	1.31736	0.313087	0.863175	0.255412
transcript=PF3D7_1452500.1	1.94714	0.0126516	1.07984	0.601901	1.77841	0.0235978	0.914106	0.686818
transcript=PF3D7_1453700.1	1.04816	0.649219	1.0034	0.969874	1.06036	0.406675	0.872079	0.178035
transcript=PF3D7_1453800.1	0.872922	0.533355	0.981844	0.890471	0.774923	0.263557	1.08807	0.478748
transcript=PF3D7_1454000.1	1.38262	0.335783	0.893025	0.595737	2.1956	0.0643906	0.753032	0.180384
transcript=PF3D7_1454400.1	1.09795	0.058958	0.980612	0.796353	1.15002	0.0466817	0.963175	0.607163
transcript=PF3D7_1454700.1	0.922766	0.624438	1.00673	0.937657	0.751387	0.0719549	0.974201	0.850408
transcript=PF3D7_1455200.1	1.12752	0.187792	0.847515	0.480787	1.01373	0.895764	0.872258	0.559593
transcript=PF3D7_1455500.1	1.17668	0.418482	1.19797	0.0222636	1.18521	0.0440178	1.0563	0.620894
transcript=PF3D7_1455700.1	1.12796	0.16622	1.02189	0.871161	1.07256	0.481014	0.978757	0.901794
transcript=PF3D7_1456500.1	1.00215	0.982866	1.03691	0.468873	1.02213	0.808936	0.993126	0.918725
transcript=PF3D7_1456700.1	1.40991	0.26754	0.769542	0.321018	1.16376	0.555931	1.1009	0.707478
transcript=PF3D7_1456800.1	0.582989	0.145955	0.941611	0.877287	0.875503	0.784182	1.10778	0.735986
transcript=PF3D7_1457200.1	1.07944	0.293634	1.0975	0.17108	1.14153	0.137441	0.978161	0.793504
transcript=PF3D7_1457300.1	0.858344	0.541896	1.08065	0.639767	0.7724	0.347203	1.11121	0.534299
transcript=PF3D7_1458500.1	0.990828	0.920462	1.34754	0.311297	1.0153	0.906883	0.929028	0.339145
transcript=PF3D7_1459000.1	1.60397	0.064639	1.74267	0.242742	1.34733	0.200419	1.38927	0.297377
transcript=PF3D7_1459600.1	0.84355	0.197316	0.967748	0.696951	0.920968	0.309299	0.915351	0.18888
transcript=PF3D7_1460500.1	1.05399	0.370017	1.01148	0.878396	1.01315	0.921226	0.992517	0.912176
transcript=PF3D7_1460700.1	0.868761	0.269413	0.933084	0.503527	0.837891	0.295895	0.962356	0.666958
transcript=PF3D7_1461300.1	1.12751	0.299246	1.23778	0.203027	1.21383	0.195251	0.99374	0.966949
transcript=PF3D7_1461400.1	1.03293	0.826291	0.962863	0.604006	0.994951	0.960019	0.960524	0.631909
transcript=PF3D7_1461600.1	1.30467	0.253157	1.10004	0.247693	1.31039	0.07877	0.851996	0.276601
transcript=PF3D7_1461900.1	1.12634	0.191675	0.942789	0.0641484	1.09477	0.0211133	1.00068	0.984955
transcript=PF3D7_1462100.1	0.927543	0.730801	0.6467	0.557431	1.06504	0.739012	0.302137	0.224909
transcript=PF3D7_1462800.1	1.06431	0.294165	1.08823	0.0296981	1.06522	0.364169	1.06868	0.312549
transcript=PF3D7_1463200.1	0.813487	0.335633	1.09935	0.138384	0.846411	0.418158	1.1022	0.214523
transcript=PF3D7_1463300.1	0.932217	0.650465	1.05976	0.677318	0.867902	0.469036	1.07652	0.496122
transcript=PF3D7_1464500.1	1.02488	0.828317	0.93394	0.726801	1.21428	0.28392	0.934269	0.695526
transcript=PF3D7_1464600.1	1.07155	0.761526	1.13454	0.65064	0.758887	0.185794	0.996369	0.989741
transcript=PF3D7_1464700.1	0.819868	0.469564	1.19568	0.0474506	0.980376	0.930368	1.19591	0.0491991
transcript=PF3D7_1465200.1	1.76858	0.0327004	1.31383	0.19622	1.02787	0.842333	1.51471	0.0945942
transcript=PF3D7_1465300.1	0.916696	0.532402	0.93983	0.349719	0.951836	0.669548	0.820019	0.0732013
transcript=PF3D7_1465900.1	1.01698	0.498328	0.914877	0.0179044	1.03372	0.643435	0.930159	0.0463025
transcript=PF3D7_1466100.1	1.01273	0.881129	0.92372	0.754212	0.899643	0.638623	1.06923	0.824593
transcript=PF3D7_1466300.1	1.18756	0.0173969	1.03211	0.352459	1.26602	0.0110467	0.97215	0.24345
transcript=PF3D7_1466400.1	1.00669	0.968795	1.16121	0.250741	1.05614	0.794319	1.19566	0.0321145
transcript=PF3D7_1466800.1	0.983549	0.933546	1.37837	0.405143	1.0818	0.702471	1.34883	0.180261
transcript=PF3D7_1466900.1	1.0672	0.551949	1.07704	0.560898	1.13101	0.285008	0.972048	0.826356
transcript=PF3D7_1468100.1	1.04911	0.380822	1.08534	0.377414	1.07006	0.447994	0.962717	0.654437
transcript=PF3D7_1468700.1	0.938149	0.722857	0.843339	0.0237052	0.862423	0.406277	0.975848	0.642296
transcript=PF3D7_1468900.1	0.998548	0.989241	1.11551	0.369394	0.994328	0.912424	1.21551	0.0327398
transcript=PF3D7_1470900.1	0.767404	0.0275485	0.790613	0.0130298	0.781521	0.0346706	0.838163	0.0336417
transcript=PF3D7_1471100.1	0.987018	0.770403	0.946638	0.45521	1.00951	0.812006	0.983982	0.773675
transcript=PF3D7_1471200.1	1.40429	0.0689386	1.55674	0.00385596	1.50072	0.0202555	1.33466	0.0269313
transcript=PF3D7_1471400.1	0.688941	0.61908	0.497442	0.255284	0.953417	0.953768	1.11859	0.782723
transcript=PF3D7_1473200.1	0.93985	0.577016	0.925254	0.513412	0.843127	0.115144	1.02124	0.790035
transcript=PF3D7_1473700.1	0.977342	0.819088	1.07937	0.427282	0.994109	0.94742	1.00564	0.9362
transcript=PF3D7_1474500.1	0.618979	0.173119	1.00418	0.982972	0.587506	0.169019	0.995867	0.985551
transcript=PF3D7_1474800.1	0.949111	0.190447	1.01036	0.835823	1.00151	0.973969	0.961559	0.50052
transcript=PF3D7_1474900.1	1.19637	0.707734	1.11875	0.596981	1.27494	0.576371	1.09326	0.369075
transcript=PF3D7_1476300.1	1.13597	0.230259	1.21807	0.421058	1.21372	0.0239095	0.894099	0.719917
transcript=PF3D7_1477500.1	1.76277	0.231431	1.01769	0.822553	1.79329	0.2173	1.03028	0.67303
