# Supplementary material for: Chemoproteomics validates selective targeting of Plasmodium M1 alanyl aminopeptidase as an antimalarial strategy
Source: eLife. 2024 Jul 8;13:RP92990. doi: 10.7554/eLife.92990 (PMC11230628; doi:10.7554/eLife.92990)
Supplement: Figure 4—source data 1. [file elife-92990-fig4-data1.xlsx]

## Sheet: Data S3 LiP-MS Exp 1
Data S3. Related to Fig. 4 and Fig. 5. Experiment 1 LiP-MS data
Comparison (group1/group2)	Group	PEP.PeptidePosition	PEP.DigestType - [Trypsin/P]	ProteinGroups	AVG Log2 Ratio	Absolute AVG Log2 Ratio	Pvalue	Qvalue	# of Ratios	UniProtIds	Genes	ProteinDescriptions	ProteinNames	# Unique Total Peptides	% Change	Ratio	Condition Numerator	Condition Denominator
2673-10uM / DMSO	_NIEIGVAYDNKPFK_	207	Specific	transcript=PF3D7_0608500.1	1.57385	1.57385	3.10656e-54	7.10221e-50	99	transcript=PF3D7_0608500.1	NaN	gene=PF3D7_0608500 | organism=Plasmodium_falciparum_3D7 | gene_product=proteasome subunit alpha type-2, putative | transcript_product=proteasome subunit alpha type-2, putative | location=Pf3D7_06_v3:351780-352775(-) | protein_length=235 | sequence_SO=chromosome | SO=protein_coding | is_pseudo=false	NaN	1	197.698	2.97698	2673-10uM	DMSO
2673-10uM / DMSO	_VGAHAGEYGAEALER_	18	Specific	P69905	1.26975	1.26975	2.70231e-51	3.08901e-47	108	P69905	HBA1	Hemoglobin subunit alpha	HBA_HUMAN	1	141.119	2.41119	2673-10uM	DMSO
2673-10uM / DMSO	_SAVTALWGK_	10	Specific	P68871	1.16849	1.16849	5.40749e-44	4.12087e-40	99	P68871	HBB	Hemoglobin subunit beta	HBB_HUMAN	1	124.777	2.24777	2673-10uM	DMSO
2673-10uM / DMSO	_EQVLISQPHEFNER_	226	Specific-N	transcript=PF3D7_0402000.1	-0.819348	0.819348	7.27107e-44	4.15578e-40	108	transcript=PF3D7_0402000.1	NaN	gene=PF3D7_0402000 | organism=Plasmodium_falciparum_3D7 | gene_product=Plasmodium exported protein (PHISTa), unknown function | transcript_product=Plasmodium exported protein (PHISTa), unknown function | location=Pf3D7_04_v3:114601-116058(-) | protein_length=428 | sequence_SO=chromosome | SO=protein_coding | is_pseudo=false	NaN	1	-43.3302	0.566698	2673-10uM	DMSO
2673-10uM / DMSO	_TVEC[Carbamidomethyl (C)]ALLIETLQK_	56	Specific-N	transcript=PF3D7_0520900.1	-1.12693	1.12693	2.22866e-43	1.01903e-39	108	transcript=PF3D7_0520900.1	NaN	gene=PF3D7_0520900 | organism=Plasmodium_falciparum_3D7 | gene_product=adenosylhomocysteinase | transcript_product=adenosylhomocysteinase | location=Pf3D7_05_v3:857038-858477(+) | protein_length=479 | sequence_SO=chromosome | SO=protein_coding | is_pseudo=false	NaN	1	-54.2111	0.457889	2673-10uM	DMSO
2673-1uM / DMSO	_LC[Carbamidomethyl (C)]GANESVVISSK_	81	Specific	transcript=PF3D7_1361900.1	1.26461	1.26461	3.44987e-39	1.31451e-35	54	transcript=PF3D7_1361900.1	NaN	gene=PF3D7_1361900 | organism=Plasmodium_falciparum_3D7 | gene_product=proliferating cell nuclear antigen 1 | transcript_product=proliferating cell nuclear antigen 1 | location=Pf3D7_13_v3:2482472-2483296(-) | protein_length=274 | sequence_SO=chromosome | SO=protein_coding | is_pseudo=false	NaN	1	140.263	2.40263	2673-1uM	DMSO
2673-1uM / DMSO	_IDMIDESEVLTIADEMHHIDK_	100	Specific	transcript=PF3D7_0621200.1	0.721189	0.721189	1.22803e-38	4.01076e-35	108	transcript=PF3D7_0621200.1	NaN	gene=PF3D7_0621200 | organism=Plasmodium_falciparum_3D7 | gene_product=pyridoxine biosynthesis protein PDX1 | transcript_product=pyridoxine biosynthesis protein PDX1 | location=Pf3D7_06_v3:871297-872202(-) | protein_length=301 | sequence_SO=chromosome | SO=protein_coding | is_pseudo=false	NaN	1	64.854	1.64854	2673-1uM	DMSO
2673-1uM / DMSO	_DHAGHEVDLKPFK_	202	Specific-N	transcript=PF3D7_1029600.1	-0.691175	0.691175	1.11206e-37	3.178e-34	99	transcript=PF3D7_1029600.1	NaN	gene=PF3D7_1029600 | organism=Plasmodium_falciparum_3D7 | gene_product=adenosine deaminase | transcript_product=adenosine deaminase | location=Pf3D7_10_v3:1206302-1207405(+) | protein_length=367 | sequence_SO=chromosome | SO=protein_coding | is_pseudo=false	NaN	1	-38.0651	0.619349	2673-1uM	DMSO
2673-10uM / DMSO	_ITFFIDRPDMMAK_	326	Specific	transcript=PF3D7_1311800.1	0.892713	0.892713	2.03975e-37	5.18142e-34	99	transcript=PF3D7_1311800.1	NaN	gene=PF3D7_1311800 | organism=Plasmodium_falciparum_3D7 | gene_product=M1-family alanyl aminopeptidase | transcript_product=M1-family alanyl aminopeptidase | location=Pf3D7_13_v3:501790-505047(+) | protein_length=1085 | sequence_SO=chromosome | SO=protein_coding | is_pseudo=false	NaN	1	85.6664	1.85666	2673-10uM	DMSO
2673-10uM / DMSO	_DHAGHEVDLKPFK_	202	Specific-N	transcript=PF3D7_1029600.1	-0.76934	0.76934	7.02114e-37	1.60517e-33	99	transcript=PF3D7_1029600.1	NaN	gene=PF3D7_1029600 | organism=Plasmodium_falciparum_3D7 | gene_product=adenosine deaminase | transcript_product=adenosine deaminase | location=Pf3D7_10_v3:1206302-1207405(+) | protein_length=367 | sequence_SO=chromosome | SO=protein_coding | is_pseudo=false	NaN	1	-41.3314	0.586686	2673-10uM	DMSO
2673-10uM / DMSO	_HNVGEDLVFDGVGLK_	238	Specific	transcript=PF3D7_1311800.1	1.39153	1.39153	1.99361e-36	4.14344e-33	108	transcript=PF3D7_1311800.1	NaN	gene=PF3D7_1311800 | organism=Plasmodium_falciparum_3D7 | gene_product=M1-family alanyl aminopeptidase | transcript_product=M1-family alanyl aminopeptidase | location=Pf3D7_13_v3:501790-505047(+) | protein_length=1085 | sequence_SO=chromosome | SO=protein_coding | is_pseudo=false	NaN	1	162.356	2.62356	2673-10uM	DMSO
2673-10uM / DMSO	_LSQIENAISDVMGKPL_	21	Unspecific	transcript=PF3D7_1229400.1	-1.61104	1.61104	3.25586e-36	6.20295e-33	90	transcript=PF3D7_1229400.1	NaN	gene=PF3D7_1229400 | organism=Plasmodium_falciparum_3D7 | gene_product=macrophage migration inhibitory factor | transcript_product=macrophage migration inhibitory factor | location=Pf3D7_12_v3:1208912-1209542(+) | protein_length=116 | sequence_SO=chromosome | SO=protein_coding | is_pseudo=false	NaN	1	-67.2637	0.327363	2673-10uM	DMSO
2673-1uM / DMSO	_VGAHAGEYGAEALER_	18	Specific	P69905	1.05002	1.05002	1.18709e-35	2.08763e-32	108	P69905	HBA1	Hemoglobin subunit alpha	HBA_HUMAN	1	107.055	2.07055	2673-1uM	DMSO
2673-10uM / DMSO	_IDLIDEALLRPGR_	411	Specific	transcript=PF3D7_0303000.1	-1.36344	1.36344	5.38904e-35	8.8003e-32	81	transcript=PF3D7_0303000.1	NaN	gene=PF3D7_0303000 | organism=Plasmodium_falciparum_3D7 | gene_product=N-ethylmaleimide-sensitive fusion protein | transcript_product=N-ethylmaleimide-sensitive fusion protein | location=Pf3D7_03_v3:159353-161704(-) | protein_length=783 | sequence_SO=chromosome | SO=protein_coding | is_pseudo=false	NaN	1	-61.1345	0.388655	2673-10uM	DMSO
2673-10uM / DMSO	_KLPADVAEELATTAQK_	13	Specific	transcript=PF3D7_1444800.1	0.973529	0.973529	1.39184e-34	2.12135e-31	99	transcript=PF3D7_1444800.1	NaN	gene=PF3D7_1444800 | organism=Plasmodium_falciparum_3D7 | gene_product=fructose-bisphosphate aldolase | transcript_product=fructose-bisphosphate aldolase | location=Pf3D7_14_v3:1844041-1845617(-) | protein_length=369 | sequence_SO=chromosome | SO=protein_coding | is_pseudo=false	NaN	1	96.3637	1.96364	2673-10uM	DMSO
2673-10uM / DMSO	_GWVIHPLGLR_	647	Specific	P02730	0.665923	0.665923	2.95249e-34	4.21874e-31	108	P02730	SLC4A1	Band 3 anion transport protein	B3AT_HUMAN	1	58.6583	1.58658	2673-10uM	DMSO
2673-10uM / DMSO	_DLDHC[Carbamidomethyl (C)]C[Carbamidomethyl (C)]LVNDEGK_	211	Specific	transcript=PF3D7_1012400.1	0.923021	0.923021	3.70912e-34	4.72126e-31	99	transcript=PF3D7_1012400.1	NaN	gene=PF3D7_1012400 | organism=Plasmodium_falciparum_3D7 | gene_product=hypoxanthine-guanine phosphoribosyltransferase | transcript_product=hypoxanthine-guanine phosphoribosyltransferase | location=Pf3D7_10_v3:475327-476563(-) | protein_length=231 | sequence_SO=chromosome | SO=protein_coding | is_pseudo=false	NaN	1	89.6082	1.89608	2673-10uM	DMSO
2673-10uM / DMSO	_EINPNHPIMIDLLK_	702	Specific-N	transcript=PF3D7_1222300.1	-0.636271	0.636271	3.7172e-34	4.72126e-31	99	transcript=PF3D7_1222300.1	NaN	gene=PF3D7_1222300 | organism=Plasmodium_falciparum_3D7 | gene_product=endoplasmin, putative | transcript_product=endoplasmin, putative | location=Pf3D7_12_v3:883567-886032(-) | protein_length=821 | sequence_SO=chromosome | SO=protein_coding | is_pseudo=false	NaN	1	-35.6626	0.643374	2673-10uM	DMSO
2673-10uM / DMSO	_DFVGYDHAGHEVDLKPFK_	197	Specific	transcript=PF3D7_1029600.1	0.628891	0.628891	5.65469e-34	6.80408e-31	99	transcript=PF3D7_1029600.1	NaN	gene=PF3D7_1029600 | organism=Plasmodium_falciparum_3D7 | gene_product=adenosine deaminase | transcript_product=adenosine deaminase | location=Pf3D7_10_v3:1206302-1207405(+) | protein_length=367 | sequence_SO=chromosome | SO=protein_coding | is_pseudo=false	NaN	1	54.6376	1.54638	2673-10uM	DMSO
2673-1uM / DMSO	_GLNEAVALL_	155	Specific-C	transcript=PF3D7_1029600.1	-0.751721	0.751721	8.01099e-34	9.15737e-31	108	transcript=PF3D7_1029600.1	NaN	gene=PF3D7_1029600 | organism=Plasmodium_falciparum_3D7 | gene_product=adenosine deaminase | transcript_product=adenosine deaminase | location=Pf3D7_10_v3:1206302-1207405(+) | protein_length=367 | sequence_SO=chromosome | SO=protein_coding | is_pseudo=false	NaN	1	-40.6105	0.593895	2673-1uM	DMSO
2673-10uM / DMSO	_INEISINNK_	253	Specific	transcript=PF3D7_1311800.1	1.70815	1.70815	1.19058e-33	1.29615e-30	45	transcript=PF3D7_1311800.1	NaN	gene=PF3D7_1311800 | organism=Plasmodium_falciparum_3D7 | gene_product=M1-family alanyl aminopeptidase | transcript_product=M1-family alanyl aminopeptidase | location=Pf3D7_13_v3:501790-505047(+) | protein_length=1085 | sequence_SO=chromosome | SO=protein_coding | is_pseudo=false	NaN	1	226.742	3.26742	2673-10uM	DMSO
2673-1uM / DMSO	_SGHQGAPIGC[Carbamidomethyl (C)]APIAHIL_	29	Specific-C	transcript=PF3D7_0610800.1	-0.678908	0.678908	2.05613e-33	2.05196e-30	108	transcript=PF3D7_0610800.1	NaN	gene=PF3D7_0610800 | organism=Plasmodium_falciparum_3D7 | gene_product=transketolase | transcript_product=transketolase | location=Pf3D7_06_v3:453671-455689(+) | protein_length=672 | sequence_SO=chromosome | SO=protein_coding | is_pseudo=false	NaN	1	-37.5362	0.624638	2673-1uM	DMSO
2673-10uM / DMSO	_QGVVQHLLVNNLAIGR_	133	Specific	transcript=PF3D7_1438900.1	0.847777	0.847777	2.06435e-33	2.05196e-30	99	transcript=PF3D7_1438900.1	NaN	gene=PF3D7_1438900 | organism=Plasmodium_falciparum_3D7 | gene_product=thioredoxin peroxidase 1 | transcript_product=thioredoxin peroxidase 1 | location=Pf3D7_14_v3:1575984-1576571(+) | protein_length=195 | sequence_SO=chromosome | SO=protein_coding | is_pseudo=false	NaN	1	79.9726	1.79973	2673-10uM	DMSO
2673-10uM / DMSO	_SGMIIGIDENNKPELFK_	143	Specific-N	transcript=PF3D7_0807500.1	0.653481	0.653481	2.92554e-33	2.78682e-30	108	transcript=PF3D7_0807500.1	NaN	gene=PF3D7_0807500 | organism=Plasmodium_falciparum_3D7 | gene_product=proteasome subunit alpha type-6, putative | transcript_product=proteasome subunit alpha type-6, putative | location=Pf3D7_08_v3:387219-388364(+) | protein_length=260 | sequence_SO=chromosome | SO=protein_coding | is_pseudo=false	NaN	1	57.2959	1.57296	2673-10uM	DMSO
2673-1uM / DMSO	_LSQIENAISDVMGKPL_	21	Unspecific	transcript=PF3D7_1229400.1	-1.51752	1.51752	5.99254e-33	5.4133e-30	90	transcript=PF3D7_1229400.1	NaN	gene=PF3D7_1229400 | organism=Plasmodium_falciparum_3D7 | gene_product=macrophage migration inhibitory factor | transcript_product=macrophage migration inhibitory factor | location=Pf3D7_12_v3:1208912-1209542(+) | protein_length=116 | sequence_SO=chromosome | SO=protein_coding | is_pseudo=false	NaN	1	-65.0715	0.349285	2673-1uM	DMSO
2673-1uM / DMSO	_DDENVLNFLVLEK_	282	Specific	transcript=PF3D7_1454400.1	1.26735	1.26735	6.15632e-33	5.4133e-30	54	transcript=PF3D7_1454400.1	NaN	gene=PF3D7_1454400 | organism=Plasmodium_falciparum_3D7 | gene_product=aminopeptidase P | transcript_product=aminopeptidase P | location=Pf3D7_14_v3:2234143-2236476(+) | protein_length=777 | sequence_SO=chromosome | SO=protein_coding | is_pseudo=false	NaN	1	140.719	2.40719	2673-1uM	DMSO
2673-10uM / DMSO	_IC[Carbamidomethyl (C)]AEHVDIPVEAQR_	31	Specific	transcript=PF3D7_1113400.1	1.14503	1.14503	8.79056e-33	7.44332e-30	99	transcript=PF3D7_1113400.1	NaN	gene=PF3D7_1113400 | organism=Plasmodium_falciparum_3D7 | gene_product=ubiquitin domain-containing protein DSK2, putative | transcript_product=ubiquitin domain-containing protein DSK2, putative | location=Pf3D7_11_v3:521122-522824(-) | protein_length=388 | sequence_SO=chromosome | SO=protein_coding | is_pseudo=false	NaN	1	121.151	2.21151	2673-10uM	DMSO
2673-10uM / DMSO	_LANSIGLIDAGYR_	101	Specific	transcript=PF3D7_1127100.1	1.27692	1.27692	9.21594e-33	7.52482e-30	54	transcript=PF3D7_1127100.1	NaN	gene=PF3D7_1127100 | organism=Plasmodium_falciparum_3D7 | gene_product=deoxyuridine 5'-triphosphate nucleotidohydrolase | transcript_product=deoxyuridine 5'-triphosphate nucleotidohydrolase | location=Pf3D7_11_v3:1060262-1060783(-) | protein_length=173 | sequence_SO=chromosome | SO=protein_coding | is_pseudo=false	NaN	1	142.321	2.42321	2673-10uM	DMSO
2673-10uM / DMSO	_EHEWEELNK_	303	Specific-N	transcript=PF3D7_0708400.1	0.737964	0.737964	1.15185e-32	9.08058e-30	81	transcript=PF3D7_0708400.1	NaN	gene=PF3D7_0708400 | organism=Plasmodium_falciparum_3D7 | gene_product=heat shock protein 90 | transcript_product=heat shock protein 90 | location=Pf3D7_07_v3:381592-384614(+) | protein_length=745 | sequence_SO=chromosome | SO=protein_coding | is_pseudo=false	NaN	1	66.782	1.66782	2673-10uM	DMSO
2673-1uM / DMSO	_TYFPHFDLSHG_	42	Specific-C	P69905	-0.531981	0.531981	1.20489e-32	9.18203e-30	108	P69905	HBA1	Hemoglobin subunit alpha	HBA_HUMAN	1	-30.8396	0.691604	2673-1uM	DMSO
2673-10uM / DMSO	_QFLEDSSPLSHPIRPE_	551	Unspecific	transcript=PF3D7_1311800.1	-0.776767	0.776767	1.30405e-32	9.61715e-30	99	transcript=PF3D7_1311800.1	NaN	gene=PF3D7_1311800 | organism=Plasmodium_falciparum_3D7 | gene_product=M1-family alanyl aminopeptidase | transcript_product=M1-family alanyl aminopeptidase | location=Pf3D7_13_v3:501790-505047(+) | protein_length=1085 | sequence_SO=chromosome | SO=protein_coding | is_pseudo=false	NaN	1	-41.6327	0.583673	2673-10uM	DMSO
2673-1uM / DMSO	_LKPENVEIHFL_	416	Unspecific	transcript=PF3D7_1446200.1	-0.512715	0.512715	1.81489e-32	1.29662e-29	90	transcript=PF3D7_1446200.1	NaN	gene=PF3D7_1446200 | organism=Plasmodium_falciparum_3D7 | gene_product=M17 leucyl aminopeptidase | transcript_product=M17 leucyl aminopeptidase | location=Pf3D7_14_v3:1893200-1895017(-) | protein_length=605 | sequence_SO=chromosome | SO=protein_coding | is_pseudo=false	NaN	1	-29.9098	0.700902	2673-1uM	DMSO
2673-10uM / DMSO	_MNLWAVQK_	344	Specific	transcript=PF3D7_1029600.1	0.937082	0.937082	2.02933e-32	1.4059e-29	45	transcript=PF3D7_1029600.1	NaN	gene=PF3D7_1029600 | organism=Plasmodium_falciparum_3D7 | gene_product=adenosine deaminase | transcript_product=adenosine deaminase | location=Pf3D7_10_v3:1206302-1207405(+) | protein_length=367 | sequence_SO=chromosome | SO=protein_coding | is_pseudo=false	NaN	1	91.4652	1.91465	2673-10uM	DMSO
2673-1uM / DMSO	_SAVTALWGK_	10	Specific	P68871	0.972396	0.972396	2.54291e-32	1.70988e-29	99	P68871	HBB	Hemoglobin subunit beta	HBB_HUMAN	1	96.2097	1.9621	2673-1uM	DMSO
2673-10uM / DMSO	_SFIMIKPDGVQR_	4	Specific	transcript=PF3D7_1366500.1	0.684679	0.684679	4.90855e-32	3.20626e-29	99	transcript=PF3D7_1366500.1	NaN	gene=PF3D7_1366500 | organism=Plasmodium_falciparum_3D7 | gene_product=nucleoside diphosphate kinase | transcript_product=nucleoside diphosphate kinase | location=Pf3D7_13_v3:2661573-2662022(+) | protein_length=149 | sequence_SO=chromosome | SO=protein_coding | is_pseudo=false	NaN	1	60.7345	1.60734	2673-10uM	DMSO
2673-10uM / DMSO	_TADLLHVPVVK_	73	Specific	transcript=PF3D7_1120100.1	0.623689	0.623689	5.27047e-32	3.34704e-29	108	transcript=PF3D7_1120100.1	NaN	gene=PF3D7_1120100 | organism=Plasmodium_falciparum_3D7 | gene_product=phosphoglycerate mutase, putative | transcript_product=phosphoglycerate mutase, putative | location=Pf3D7_11_v3:761695-762818(+) | protein_length=250 | sequence_SO=chromosome | SO=protein_coding | is_pseudo=false	NaN	1	54.081	1.54081	2673-10uM	DMSO
2673-10uM / DMSO	_GVEQVIEL_	285	Unspecific	transcript=PF3D7_1324900.1	-5.1864	5.1864	6.53005e-32	4.03486e-29	63	transcript=PF3D7_1324900.1	NaN	gene=PF3D7_1324900 | organism=Plasmodium_falciparum_3D7 | gene_product=L-lactate dehydrogenase | transcript_product=L-lactate dehydrogenase | location=Pf3D7_13_v3:1041157-1042107(+) | protein_length=316 | sequence_SO=chromosome | SO=protein_coding | is_pseudo=false	NaN	1	-97.2538	0.0274623	2673-10uM	DMSO
2673-1uM / DMSO	_SQIENAISDVMGK_	22	Specific-N	transcript=PF3D7_1229400.1	-0.858268	0.858268	8.04706e-32	4.84136e-29	54	transcript=PF3D7_1229400.1	NaN	gene=PF3D7_1229400 | organism=Plasmodium_falciparum_3D7 | gene_product=macrophage migration inhibitory factor | transcript_product=macrophage migration inhibitory factor | location=Pf3D7_12_v3:1208912-1209542(+) | protein_length=116 | sequence_SO=chromosome | SO=protein_coding | is_pseudo=false	NaN	1	-44.8386	0.551614	2673-1uM	DMSO
2673-1uM / DMSO	_ESDTFVFNNIAVKPIPSLFR_	715	Specific	transcript=PF3D7_1311800.1	1.02298	1.02298	1.03281e-31	6.05438e-29	54	transcript=PF3D7_1311800.1	NaN	gene=PF3D7_1311800 | organism=Plasmodium_falciparum_3D7 | gene_product=M1-family alanyl aminopeptidase | transcript_product=M1-family alanyl aminopeptidase | location=Pf3D7_13_v3:501790-505047(+) | protein_length=1085 | sequence_SO=chromosome | SO=protein_coding | is_pseudo=false	NaN	1	103.211	2.03211	2673-1uM	DMSO
2673-1uM / DMSO	_IC[Carbamidomethyl (C)]AEHVDIPVEAQR_	31	Specific	transcript=PF3D7_1113400.1	1.13174	1.13174	1.07133e-31	6.12317e-29	99	transcript=PF3D7_1113400.1	NaN	gene=PF3D7_1113400 | organism=Plasmodium_falciparum_3D7 | gene_product=ubiquitin domain-containing protein DSK2, putative | transcript_product=ubiquitin domain-containing protein DSK2, putative | location=Pf3D7_11_v3:521122-522824(-) | protein_length=388 | sequence_SO=chromosome | SO=protein_coding | is_pseudo=false	NaN	1	119.123	2.19123	2673-1uM	DMSO
2673-10uM / DMSO	_HVVFGEVVEGLDK_	155	Specific	transcript=PF3D7_1115600.1	0.577956	0.577956	1.11956e-31	6.2428e-29	108	transcript=PF3D7_1115600.1	NaN	gene=PF3D7_1115600 | organism=Plasmodium_falciparum_3D7 | gene_product=peptidyl-prolyl cis-trans isomerase | transcript_product=peptidyl-prolyl cis-trans isomerase | location=Pf3D7_11_v3:589707-590629(-) | protein_length=195 | sequence_SO=chromosome | SO=protein_coding | is_pseudo=false	NaN	1	49.2732	1.49273	2673-10uM	DMSO
2673-10uM / DMSO	_NHILAPTQEDDSIK_	78	Specific	transcript=PF3D7_1220900.1	-1.03776	1.03776	2.92979e-31	1.59478e-28	81	transcript=PF3D7_1220900.1	NaN	gene=PF3D7_1220900 | organism=Plasmodium_falciparum_3D7 | gene_product=heterochromatin protein 1 | transcript_product=heterochromatin protein 1 | location=Pf3D7_12_v3:831252-832052(-) | protein_length=266 | sequence_SO=chromosome | SO=protein_coding | is_pseudo=false	NaN	1	-51.2916	0.487084	2673-10uM	DMSO
2673-10uM / DMSO	_VHIMEGSLVC[Carbamidomethyl (C)]PK_	94	Specific	transcript=PF3D7_1407500.1	1.12281	1.12281	5.07259e-31	2.69697e-28	81	transcript=PF3D7_1407500.1	NaN	gene=PF3D7_1407500 | organism=Plasmodium_falciparum_3D7 | gene_product=multifunctional methyltransferase subunit TRM112, putative | transcript_product=multifunctional methyltransferase subunit TRM112, putative | location=Pf3D7_14_v3:269881-270927(+) | protein_length=125 | sequence_SO=chromosome | SO=protein_coding | is_pseudo=false	NaN	1	117.77	2.1777	2673-10uM	DMSO
2673-10uM / DMSO	_SNIVNTSFLLFPR_	79	Specific	transcript=PF3D7_1127100.1	0.821659	0.821659	7.01776e-31	3.64636e-28	54	transcript=PF3D7_1127100.1	NaN	gene=PF3D7_1127100 | organism=Plasmodium_falciparum_3D7 | gene_product=deoxyuridine 5'-triphosphate nucleotidohydrolase | transcript_product=deoxyuridine 5'-triphosphate nucleotidohydrolase | location=Pf3D7_11_v3:1060262-1060783(-) | protein_length=173 | sequence_SO=chromosome | SO=protein_coding | is_pseudo=false	NaN	1	76.7437	1.76744	2673-10uM	DMSO
2673-10uM / DMSO	_QLTNTHPVATPVNWK_	165	Specific-N	transcript=PF3D7_0802200.1	-1.16649	1.16649	8.61609e-31	4.37735e-28	54	transcript=PF3D7_0802200.1	NaN	gene=PF3D7_0802200 | organism=Plasmodium_falciparum_3D7 | gene_product=1-cys peroxiredoxin | transcript_product=1-cys peroxiredoxin | location=Pf3D7_08_v3:165416-166078(+) | protein_length=220 | sequence_SO=chromosome | SO=protein_coding | is_pseudo=false	NaN	1	-55.4497	0.445503	2673-10uM	DMSO
2673-10uM / DMSO	_THIVC[Carbamidomethyl (C)]TLGPAC[Carbamidomethyl (C)]K_	39	Specific	transcript=PF3D7_0626800.1	0.678713	0.678713	1.35949e-30	6.75664e-28	108	transcript=PF3D7_0626800.1	NaN	gene=PF3D7_0626800 | organism=Plasmodium_falciparum_3D7 | gene_product=pyruvate kinase | transcript_product=pyruvate kinase | location=Pf3D7_06_v3:1078995-1081320(+) | protein_length=511 | sequence_SO=chromosome | SO=protein_coding | is_pseudo=false	NaN	1	60.0711	1.60071	2673-10uM	DMSO
2673-10uM / DMSO	_HDTSLKPISVSYNPATAK_	41	Specific	P00915	0.664088	0.664088	2.40341e-30	1.14713e-27	135	P00915	CA1	Carbonic anhydrase 1	CAH1_HUMAN	1	58.4566	1.58457	2673-10uM	DMSO
2673-1uM / DMSO	_SHC[Carbamidomethyl (C)]LLVTL_	103	Unspecific	P69905	-0.672407	0.672407	2.40845e-30	1.14713e-27	99	P69905	HBA1	Hemoglobin subunit alpha	HBA_HUMAN	1	-37.2541	0.627459	2673-1uM	DMSO
2673-10uM / DMSO	_GLNEAVALL_	155	Specific-C	transcript=PF3D7_1029600.1	-0.616091	0.616091	6.07588e-30	2.77814e-27	108	transcript=PF3D7_1029600.1	NaN	gene=PF3D7_1029600 | organism=Plasmodium_falciparum_3D7 | gene_product=adenosine deaminase | transcript_product=adenosine deaminase | location=Pf3D7_10_v3:1206302-1207405(+) | protein_length=367 | sequence_SO=chromosome | SO=protein_coding | is_pseudo=false	NaN	1	-34.7564	0.652436	2673-10uM	DMSO
2673-10uM / DMSO	_YIPTLGVEVHPLK_	38	Specific	transcript=PF3D7_1117700.1	0.645281	0.645281	6.80581e-30	3.05087e-27	99	transcript=PF3D7_1117700.1	NaN	gene=PF3D7_1117700 | organism=Plasmodium_falciparum_3D7 | gene_product=GTP-binding nuclear protein RAN/TC4 | transcript_product=GTP-binding nuclear protein RAN/TC4 | location=Pf3D7_11_v3:670711-671515(-) | protein_length=214 | sequence_SO=chromosome | SO=protein_coding | is_pseudo=false	NaN	1	56.4043	1.56404	2673-10uM	DMSO
2673-10uM / DMSO	_GTFSQLSELHC[Carbamidomethyl (C)]DK_	84	Specific	P02042	1.14452	1.14452	8.81256e-30	3.87448e-27	72	P02042	HBD	Hemoglobin subunit delta	HBD_HUMAN	1	121.073	2.21073	2673-10uM	DMSO
2673-10uM / DMSO	_YLLEDPHADAGFK_	809	Specific	transcript=PF3D7_1311800.1	0.50212	0.50212	1.38729e-29	5.9842e-27	108	transcript=PF3D7_1311800.1	NaN	gene=PF3D7_1311800 | organism=Plasmodium_falciparum_3D7 | gene_product=M1-family alanyl aminopeptidase | transcript_product=M1-family alanyl aminopeptidase | location=Pf3D7_13_v3:501790-505047(+) | protein_length=1085 | sequence_SO=chromosome | SO=protein_coding | is_pseudo=false	NaN	1	41.6293	1.41629	2673-10uM	DMSO
2673-1uM / DMSO	_GPLLVQDVVFTDEMAHFDR_	48	Specific	P04040	0.714661	0.714661	1.83983e-29	7.7893e-27	54	P04040	CAT	Catalase	CATA_HUMAN	1	64.1098	1.6411	2673-1uM	DMSO
2673-1uM / DMSO	_LFDIGEGISEVEITK_	38	Specific	transcript=PF3D7_0303700.1	0.855236	0.855236	1.96679e-29	8.1754e-27	54	transcript=PF3D7_0303700.1	NaN	gene=PF3D7_0303700 | organism=Plasmodium_falciparum_3D7 | gene_product=lipoamide acyltransferase component of branched-chain alpha-keto acid dehydrogenase complex | transcript_product=lipoamide acyltransferase component of branched-chain alpha-keto acid dehydrogenase complex | location=Pf3D7_03_v3:191245-192591(-) | protein_length=448 | sequence_SO=chromosome | SO=protein_coding | is_pseudo=false	NaN	1	80.9054	1.80905	2673-1uM	DMSO
2673-10uM / DMSO	_FSPYFVNPIVVGFK_	102	Specific	transcript=PF3D7_0108000.1	1.51405	1.51405	6.36474e-29	2.59841e-26	54	transcript=PF3D7_0108000.1	NaN	gene=PF3D7_0108000 | organism=Plasmodium_falciparum_3D7 | gene_product=proteasome subunit beta type-3, putative | transcript_product=proteasome subunit beta type-3, putative | location=Pf3D7_01_v3:328431-329558(-) | protein_length=218 | sequence_SO=chromosome | SO=protein_coding | is_pseudo=false	NaN	1	185.61	2.8561	2673-10uM	DMSO
2673-10uM / DMSO	_GENC[Carbamidomethyl (C)]AVIISQK_	44	Specific	transcript=PF3D7_0807500.1	1.33136	1.33136	9.76034e-29	3.91475e-26	45	transcript=PF3D7_0807500.1	NaN	gene=PF3D7_0807500 | organism=Plasmodium_falciparum_3D7 | gene_product=proteasome subunit alpha type-6, putative | transcript_product=proteasome subunit alpha type-6, putative | location=Pf3D7_08_v3:387219-388364(+) | protein_length=260 | sequence_SO=chromosome | SO=protein_coding | is_pseudo=false	NaN	1	151.64	2.5164	2673-10uM	DMSO
2673-10uM / DMSO	_GGIGNIQHTLISDITK_	93	Specific	transcript=PF3D7_1438900.1	0.686707	0.686707	1.66175e-28	6.55014e-26	90	transcript=PF3D7_1438900.1	NaN	gene=PF3D7_1438900 | organism=Plasmodium_falciparum_3D7 | gene_product=thioredoxin peroxidase 1 | transcript_product=thioredoxin peroxidase 1 | location=Pf3D7_14_v3:1575984-1576571(+) | protein_length=195 | sequence_SO=chromosome | SO=protein_coding | is_pseudo=false	NaN	1	60.9606	1.60961	2673-10uM	DMSO
2673-1uM / DMSO	_YTAINLLHVK_	244	Specific-N	transcript=PF3D7_1029600.1	-0.929473	0.929473	2.00664e-28	7.77557e-26	108	transcript=PF3D7_1029600.1	NaN	gene=PF3D7_1029600 | organism=Plasmodium_falciparum_3D7 | gene_product=adenosine deaminase | transcript_product=adenosine deaminase | location=Pf3D7_10_v3:1206302-1207405(+) | protein_length=367 | sequence_SO=chromosome | SO=protein_coding | is_pseudo=false	NaN	1	-47.495	0.52505	2673-1uM	DMSO
2673-10uM / DMSO	_LQEPNISNNLK_	1065	Specific-N	transcript=PF3D7_1311800.1	-0.546887	0.546887	2.16219e-28	8.23866e-26	54	transcript=PF3D7_1311800.1	NaN	gene=PF3D7_1311800 | organism=Plasmodium_falciparum_3D7 | gene_product=M1-family alanyl aminopeptidase | transcript_product=M1-family alanyl aminopeptidase | location=Pf3D7_13_v3:501790-505047(+) | protein_length=1085 | sequence_SO=chromosome | SO=protein_coding | is_pseudo=false	NaN	1	-31.5504	0.684496	2673-10uM	DMSO
2673-10uM / DMSO	_ENEDIIHTEGNINPVR_	127	Specific-N	transcript=PF3D7_0722400.1	-0.809952	0.809952	2.35018e-28	8.80816e-26	99	transcript=PF3D7_0722400.1	NaN	gene=PF3D7_0722400 | organism=Plasmodium_falciparum_3D7 | gene_product=Obg-like ATPase 1, putative | transcript_product=Obg-like ATPase 1, putative | location=Pf3D7_07_v3:954784-956343(+) | protein_length=393 | sequence_SO=chromosome | SO=protein_coding | is_pseudo=false	NaN	1	-42.9599	0.570401	2673-10uM	DMSO
2673-10uM / DMSO	_IVFFTTVK_	385	Specific	transcript=PF3D7_1454400.1	0.817697	0.817697	2.54385e-28	9.38024e-26	54	transcript=PF3D7_1454400.1	NaN	gene=PF3D7_1454400 | organism=Plasmodium_falciparum_3D7 | gene_product=aminopeptidase P | transcript_product=aminopeptidase P | location=Pf3D7_14_v3:2234143-2236476(+) | protein_length=777 | sequence_SO=chromosome | SO=protein_coding | is_pseudo=false	NaN	1	76.259	1.76259	2673-10uM	DMSO
2673-1uM / DMSO	_QQGEILVIGGDEEK_	272	Specific	transcript=PF3D7_0728000.1	1.60484	1.60484	2.59219e-28	9.40677e-26	45	transcript=PF3D7_0728000.1	NaN	gene=PF3D7_0728000 | organism=Plasmodium_falciparum_3D7 | gene_product=eukaryotic translation initiation factor 2 subunit alpha | transcript_product=eukaryotic translation initiation factor 2 subunit alpha | location=Pf3D7_07_v3:1191179-1192289(-) | protein_length=329 | sequence_SO=chromosome | SO=protein_coding | is_pseudo=false	NaN	1	204.162	3.04162	2673-1uM	DMSO
2673-10uM / DMSO	_IHNYSAVETSKPLFGEHYVR_	93	Specific	transcript=PF3D7_1012400.1	1.17447	1.17447	2.99772e-28	1.07084e-25	117	transcript=PF3D7_1012400.1	NaN	gene=PF3D7_1012400 | organism=Plasmodium_falciparum_3D7 | gene_product=hypoxanthine-guanine phosphoribosyltransferase | transcript_product=hypoxanthine-guanine phosphoribosyltransferase | location=Pf3D7_10_v3:475327-476563(-) | protein_length=231 | sequence_SO=chromosome | SO=protein_coding | is_pseudo=false	NaN	1	125.71	2.2571	2673-10uM	DMSO
2673-10uM / DMSO	_TNAVAHVDDMPNAL_	68	Unspecific	P69905	0.584644	0.584644	3.98794e-28	1.40265e-25	54	P69905	HBA1	Hemoglobin subunit alpha	HBA_HUMAN	1	49.9669	1.49967	2673-10uM	DMSO
2673-10uM / DMSO	_FNTANDDNVTQVR_	432	Specific	P04040	1.60362	1.60362	8.58697e-28	2.93008e-25	45	P04040	CAT	Catalase	CATA_HUMAN	1	203.904	3.03904	2673-10uM	DMSO
2673-10uM / DMSO	_GYIGSFEIVDDHR_	45	Specific	transcript=PF3D7_0316800.1	0.528121	0.528121	1.16776e-27	3.92609e-25	99	transcript=PF3D7_0316800.1	NaN	gene=PF3D7_0316800 | organism=Plasmodium_falciparum_3D7 | gene_product=40S ribosomal protein S15A, putative | transcript_product=40S ribosomal protein S15A, putative | location=Pf3D7_03_v3:677842-678474(+) | protein_length=130 | sequence_SO=chromosome | SO=protein_coding | is_pseudo=false	NaN	1	44.205	1.44205	2673-10uM	DMSO
2673-1uM / DMSO	_ATAVLPMLNYELSDEIK_	717	Specific-N	transcript=PF3D7_0524000.1	0.500286	0.500286	1.28203e-27	4.2478e-25	54	transcript=PF3D7_0524000.1	NaN	gene=PF3D7_0524000 | organism=Plasmodium_falciparum_3D7 | gene_product=karyopherin beta | transcript_product=karyopherin beta | location=Pf3D7_05_v3:998753-1002124(+) | protein_length=1123 | sequence_SO=chromosome | SO=protein_coding | is_pseudo=false	NaN	1	41.4494	1.41449	2673-1uM	DMSO
2673-1uM / DMSO	_AVYLPFTNNLR_	998	Specific	transcript=PF3D7_1311800.1	0.720213	0.720213	1.30345e-27	4.25706e-25	54	transcript=PF3D7_1311800.1	NaN	gene=PF3D7_1311800 | organism=Plasmodium_falciparum_3D7 | gene_product=M1-family alanyl aminopeptidase | transcript_product=M1-family alanyl aminopeptidase | location=Pf3D7_13_v3:501790-505047(+) | protein_length=1085 | sequence_SO=chromosome | SO=protein_coding | is_pseudo=false	NaN	1	64.7426	1.64743	2673-1uM	DMSO
2673-10uM / DMSO	_NFIFPSFS_	531	Specific-C	transcript=PF3D7_1454400.1	-0.7336	0.7336	1.57431e-27	5.06926e-25	90	transcript=PF3D7_1454400.1	NaN	gene=PF3D7_1454400 | organism=Plasmodium_falciparum_3D7 | gene_product=aminopeptidase P | transcript_product=aminopeptidase P | location=Pf3D7_14_v3:2234143-2236476(+) | protein_length=777 | sequence_SO=chromosome | SO=protein_coding | is_pseudo=false	NaN	1	-39.8599	0.601401	2673-10uM	DMSO
2673-10uM / DMSO	_HNYDPIPVVLK_	23	Specific-N	transcript=PF3D7_0608800.1	0.432796	0.432796	1.74849e-27	5.55194e-25	54	transcript=PF3D7_0608800.1	NaN	gene=PF3D7_0608800 | organism=Plasmodium_falciparum_3D7 | gene_product=ornithine aminotransferase | transcript_product=ornithine aminotransferase | location=Pf3D7_06_v3:362635-363879(+) | protein_length=414 | sequence_SO=chromosome | SO=protein_coding | is_pseudo=false	NaN	1	34.9847	1.34985	2673-10uM	DMSO
2673-1uM / DMSO	_INDLINIC[Carbamidomethyl (C)]LLTNK_	180	Specific	transcript=PF3D7_1472600.1	1.28097	1.28097	2.74506e-27	8.59693e-25	54	transcript=PF3D7_1472600.1	NaN	gene=PF3D7_1472600 | organism=Plasmodium_falciparum_3D7 | gene_product=protein disulfide-isomerase | transcript_product=protein disulfide-isomerase | location=Pf3D7_14_v3:2962986-2965086(-) | protein_length=553 | sequence_SO=chromosome | SO=protein_coding | is_pseudo=false	NaN	1	143.002	2.43002	2673-1uM	DMSO
2673-10uM / DMSO	_NVVIHYGINPVQLK_	51	Specific	transcript=PF3D7_0813400.1	0.912138	0.912138	3.03185e-27	9.36677e-25	81	transcript=PF3D7_0813400.1	NaN	gene=PF3D7_0813400 | organism=Plasmodium_falciparum_3D7 | gene_product=conserved protein, unknown function | transcript_product=conserved protein, unknown function | location=Pf3D7_08_v3:658493-662095(-) | protein_length=659 | sequence_SO=chromosome | SO=protein_coding | is_pseudo=false	NaN	1	88.1832	1.88183	2673-10uM	DMSO
2673-1uM / DMSO	_NILADVVVL_	221	Unspecific	transcript=PF3D7_1361900.1	-0.979627	0.979627	4.7135e-27	1.4368e-24	72	transcript=PF3D7_1361900.1	NaN	gene=PF3D7_1361900 | organism=Plasmodium_falciparum_3D7 | gene_product=proliferating cell nuclear antigen 1 | transcript_product=proliferating cell nuclear antigen 1 | location=Pf3D7_13_v3:2482472-2483296(-) | protein_length=274 | sequence_SO=chromosome | SO=protein_coding | is_pseudo=false	NaN	1	-49.2889	0.507111	2673-1uM	DMSO
2673-10uM / DMSO	_LQPAEIETC[Carbamidomethyl (C)]MK_	575	Specific	transcript=PF3D7_0818900.1	0.740926	0.740926	4.94542e-27	1.48766e-24	54	transcript=PF3D7_0818900.1	NaN	gene=PF3D7_0818900 | organism=Plasmodium_falciparum_3D7 | gene_product=heat shock protein 70 | transcript_product=heat shock protein 70 | location=Pf3D7_08_v3:860384-862417(+) | protein_length=677 | sequence_SO=chromosome | SO=protein_coding | is_pseudo=false	NaN	1	67.1248	1.67125	2673-10uM	DMSO
2673-1uM / DMSO	_IGHFVEAQILEELK_	86	Specific	transcript=PF3D7_0621200.1	0.718664	0.718664	5.80914e-27	1.72479e-24	108	transcript=PF3D7_0621200.1	NaN	gene=PF3D7_0621200 | organism=Plasmodium_falciparum_3D7 | gene_product=pyridoxine biosynthesis protein PDX1 | transcript_product=pyridoxine biosynthesis protein PDX1 | location=Pf3D7_06_v3:871297-872202(-) | protein_length=301 | sequence_SO=chromosome | SO=protein_coding | is_pseudo=false	NaN	1	64.5657	1.64566	2673-1uM	DMSO
2673-1uM / DMSO	_TNAVAHVDDMPNALSAL_	68	Unspecific	P69905	1.56836	1.56836	6.52721e-27	1.91314e-24	54	P69905	HBA1	Hemoglobin subunit alpha	HBA_HUMAN	1	196.566	2.96566	2673-1uM	DMSO
2673-1uM / DMSO	_NFIFPSFS_	531	Specific-C	transcript=PF3D7_1454400.1	-0.66979	0.66979	8.23883e-27	2.38425e-24	90	transcript=PF3D7_1454400.1	NaN	gene=PF3D7_1454400 | organism=Plasmodium_falciparum_3D7 | gene_product=aminopeptidase P | transcript_product=aminopeptidase P | location=Pf3D7_14_v3:2234143-2236476(+) | protein_length=777 | sequence_SO=chromosome | SO=protein_coding | is_pseudo=false	NaN	1	-37.1402	0.628598	2673-1uM	DMSO
2673-1uM / DMSO	_NIAVKPIPSLFR_	723	Specific-N	transcript=PF3D7_1311800.1	-0.527096	0.527096	1.3646e-26	3.89968e-24	108	transcript=PF3D7_1311800.1	NaN	gene=PF3D7_1311800 | organism=Plasmodium_falciparum_3D7 | gene_product=M1-family alanyl aminopeptidase | transcript_product=M1-family alanyl aminopeptidase | location=Pf3D7_13_v3:501790-505047(+) | protein_length=1085 | sequence_SO=chromosome | SO=protein_coding | is_pseudo=false	NaN	1	-30.605	0.69395	2673-1uM	DMSO
2673-10uM / DMSO	_SIVSAVSNFNNPK_	252	Specific-N	transcript=PF3D7_0621200.1	0.600457	0.600457	1.47615e-26	4.16639e-24	54	transcript=PF3D7_0621200.1	NaN	gene=PF3D7_0621200 | organism=Plasmodium_falciparum_3D7 | gene_product=pyridoxine biosynthesis protein PDX1 | transcript_product=pyridoxine biosynthesis protein PDX1 | location=Pf3D7_06_v3:871297-872202(-) | protein_length=301 | sequence_SO=chromosome | SO=protein_coding | is_pseudo=false	NaN	1	51.6196	1.5162	2673-10uM	DMSO
2673-1uM / DMSO	_LVPLVQATFPENAVTK_	1087	Specific	P16157	0.802534	0.802534	1.63955e-26	4.57115e-24	90	P16157	ANK1	Ankyrin-1	ANK1_HUMAN	1	74.4162	1.74416	2673-1uM	DMSO
2673-1uM / DMSO	_DLDHC[Carbamidomethyl (C)]C[Carbamidomethyl (C)]LVNDEGK_	211	Specific	transcript=PF3D7_1012400.1	0.652769	0.652769	2.62295e-26	7.13878e-24	99	transcript=PF3D7_1012400.1	NaN	gene=PF3D7_1012400 | organism=Plasmodium_falciparum_3D7 | gene_product=hypoxanthine-guanine phosphoribosyltransferase | transcript_product=hypoxanthine-guanine phosphoribosyltransferase | location=Pf3D7_10_v3:475327-476563(-) | protein_length=231 | sequence_SO=chromosome | SO=protein_coding | is_pseudo=false	NaN	1	57.2183	1.57218	2673-1uM	DMSO
2673-1uM / DMSO	_VHIMEGSLVC[Carbamidomethyl (C)]PK_	94	Specific	transcript=PF3D7_1407500.1	0.998148	0.998148	2.61273e-26	7.13878e-24	81	transcript=PF3D7_1407500.1	NaN	gene=PF3D7_1407500 | organism=Plasmodium_falciparum_3D7 | gene_product=multifunctional methyltransferase subunit TRM112, putative | transcript_product=multifunctional methyltransferase subunit TRM112, putative | location=Pf3D7_14_v3:269881-270927(+) | protein_length=125 | sequence_SO=chromosome | SO=protein_coding | is_pseudo=false	NaN	1	99.7434	1.99743	2673-1uM	DMSO
2673-10uM / DMSO	_ENSILPC[Carbamidomethyl (C)]LC[Carbamidomethyl (C)]NVHEK_	199	Specific	transcript=PF3D7_1015800.1	0.718441	0.718441	2.74846e-26	7.39238e-24	108	transcript=PF3D7_1015800.1	NaN	gene=PF3D7_1015800 | organism=Plasmodium_falciparum_3D7 | gene_product=ribonucleoside-diphosphate reductase small chain, putative | transcript_product=ribonucleoside-diphosphate reductase small chain, putative | location=Pf3D7_10_v3:633682-635286(+) | protein_length=335 | sequence_SO=chromosome | SO=protein_coding | is_pseudo=false	NaN	1	64.5403	1.6454	2673-10uM	DMSO
2673-10uM / DMSO	_ITNYSGADGILIVTK_	174	Specific	transcript=PF3D7_1454400.1	1.53564	1.53564	3.01795e-26	8.02283e-24	81	transcript=PF3D7_1454400.1	NaN	gene=PF3D7_1454400 | organism=Plasmodium_falciparum_3D7 | gene_product=aminopeptidase P | transcript_product=aminopeptidase P | location=Pf3D7_14_v3:2234143-2236476(+) | protein_length=777 | sequence_SO=chromosome | SO=protein_coding | is_pseudo=false	NaN	1	189.917	2.89917	2673-10uM	DMSO
2673-10uM / DMSO	_LPEQMVQNIVK_	244	Specific	transcript=PF3D7_1405600.1	0.903494	0.903494	5.00865e-26	1.31618e-23	54	transcript=PF3D7_1405600.1	NaN	gene=PF3D7_1405600 | organism=Plasmodium_falciparum_3D7 | gene_product=ribonucleoside-diphosphate reductase small chain, putative | transcript_product=ribonucleoside-diphosphate reductase small chain, putative | location=Pf3D7_14_v3:193216-194265(-) | protein_length=349 | sequence_SO=chromosome | SO=protein_coding | is_pseudo=false	NaN	1	87.0591	1.87059	2673-10uM	DMSO
2673-10uM / DMSO	_DEENKIPDAAVE_	258	Specific-C	transcript=PF3D7_1453700.1	0.796854	0.796854	5.54251e-26	1.43992e-23	54	transcript=PF3D7_1453700.1	NaN	gene=PF3D7_1453700 | organism=Plasmodium_falciparum_3D7 | gene_product=HSP90 co-chaperone p23 | transcript_product=HSP90 co-chaperone p23 | location=Pf3D7_14_v3:2207027-2208320(+) | protein_length=275 | sequence_SO=chromosome | SO=protein_coding | is_pseudo=false	NaN	1	73.7308	1.73731	2673-10uM	DMSO
2673-10uM / DMSO	_DLTEYLMK_	185	Specific	transcript=PF3D7_1246200.1	-0.986389	0.986389	6.06619e-26	1.55826e-23	36	transcript=PF3D7_1246200.1	NaN	gene=PF3D7_1246200 | organism=Plasmodium_falciparum_3D7 | gene_product=actin I | transcript_product=actin I | location=Pf3D7_12_v3:1920784-1921914(+) | protein_length=376 | sequence_SO=chromosome | SO=protein_coding | is_pseudo=false	NaN	1	-49.5261	0.504739	2673-10uM	DMSO
2673-10uM / DMSO	_DLAGIIAIQ_	986	Specific-C	P11277	-0.718158	0.718158	6.44838e-26	1.63803e-23	54	P11277	SPTB	Spectrin beta chain, erythrocytic	SPTB1_HUMAN	1	-39.2127	0.607873	2673-10uM	DMSO
2673-10uM / DMSO	_HLPAEFTPAVH_	113	Unspecific	P69905	-0.538585	0.538585	7.28776e-26	1.81923e-23	90	P69905	HBA1	Hemoglobin subunit alpha	HBA_HUMAN	1	-31.1554	0.688446	2673-10uM	DMSO
2673-1uM / DMSO	_LDAYDNHLNMILSNVR_	36	Specific	transcript=PF3D7_0819900.1	0.475662	0.475662	7.32086e-26	1.81923e-23	90	transcript=PF3D7_0819900.1	NaN	gene=PF3D7_0819900 | organism=Plasmodium_falciparum_3D7 | gene_product=U6 snRNA-associated Sm-like protein LSm3, putative | transcript_product=U6 snRNA-associated Sm-like protein LSm3, putative | location=Pf3D7_08_v3:899004-899657(-) | protein_length=91 | sequence_SO=chromosome | SO=protein_coding | is_pseudo=false	NaN	1	39.0556	1.39056	2673-1uM	DMSO
2673-10uM / DMSO	_YGAEVYHTLK_	192	Specific	transcript=PF3D7_1015900.1	0.432185	0.432185	8.04073e-26	1.97664e-23	90	transcript=PF3D7_1015900.1	NaN	gene=PF3D7_1015900 | organism=Plasmodium_falciparum_3D7 | gene_product=enolase | transcript_product=enolase | location=Pf3D7_10_v3:637138-639011(+) | protein_length=446 | sequence_SO=chromosome | SO=protein_coding | is_pseudo=false	NaN	1	34.9276	1.34928	2673-10uM	DMSO
2673-1uM / DMSO	_LSFQEFMIVPVGAPSFK_	171	Specific	transcript=PF3D7_1015900.1	0.580233	0.580233	1.01688e-25	2.47318e-23	99	transcript=PF3D7_1015900.1	NaN	gene=PF3D7_1015900 | organism=Plasmodium_falciparum_3D7 | gene_product=enolase | transcript_product=enolase | location=Pf3D7_10_v3:637138-639011(+) | protein_length=446 | sequence_SO=chromosome | SO=protein_coding | is_pseudo=false	NaN	1	49.509	1.49509	2673-1uM	DMSO
2673-10uM / DMSO	_NLSGIVLNSINK_	362	Specific	transcript=PF3D7_0610800.1	1.04541	1.04541	1.05508e-25	2.53907e-23	54	transcript=PF3D7_0610800.1	NaN	gene=PF3D7_0610800 | organism=Plasmodium_falciparum_3D7 | gene_product=transketolase | transcript_product=transketolase | location=Pf3D7_06_v3:453671-455689(+) | protein_length=672 | sequence_SO=chromosome | SO=protein_coding | is_pseudo=false	NaN	1	106.395	2.06395	2673-10uM	DMSO
2673-1uM / DMSO	_LVINGNPITIF_	67	Specific-C	P04406	0.726213	0.726213	1.35308e-25	3.22229e-23	54	P04406	GAPDH	Glyceraldehyde-3-phosphate dehydrogenase	G3P_HUMAN	1	65.4291	1.65429	2673-1uM	DMSO
2673-10uM / DMSO	_ILTVVGHEYFHNYTGNR_	490	Specific	transcript=PF3D7_1311800.1	1.08915	1.08915	1.51181e-25	3.56318e-23	72	transcript=PF3D7_1311800.1	NaN	gene=PF3D7_1311800 | organism=Plasmodium_falciparum_3D7 | gene_product=M1-family alanyl aminopeptidase | transcript_product=M1-family alanyl aminopeptidase | location=Pf3D7_13_v3:501790-505047(+) | protein_length=1085 | sequence_SO=chromosome | SO=protein_coding | is_pseudo=false	NaN	1	112.748	2.12748	2673-10uM	DMSO
2673-10uM / DMSO	_NFTLADFM_	335	Unspecific	transcript=PF3D7_1029600.1	-1.47554	1.47554	1.83524e-25	4.28135e-23	72	transcript=PF3D7_1029600.1	NaN	gene=PF3D7_1029600 | organism=Plasmodium_falciparum_3D7 | gene_product=adenosine deaminase | transcript_product=adenosine deaminase | location=Pf3D7_10_v3:1206302-1207405(+) | protein_length=367 | sequence_SO=chromosome | SO=protein_coding | is_pseudo=false	NaN	1	-64.04	0.3596	2673-10uM	DMSO
2673-1uM / DMSO	_TPLLLMLGQEDR_	670;665	Specific	C9JIF9;P13798	0.833935	0.833935	1.98806e-25	4.59101e-23	54	C9JIF9;P13798	APEH	Acylamino-acid-releasing enzyme	C9JIF9_HUMAN;ACPH_HUMAN	1	78.2541	1.78254	2673-1uM	DMSO
2673-1uM / DMSO	_GLNEAVALLEYK_	155	Specific	transcript=PF3D7_1029600.1	0.818447	0.818447	2.25179e-25	5.14805e-23	54	transcript=PF3D7_1029600.1	NaN	gene=PF3D7_1029600 | organism=Plasmodium_falciparum_3D7 | gene_product=adenosine deaminase | transcript_product=adenosine deaminase | location=Pf3D7_10_v3:1206302-1207405(+) | protein_length=367 | sequence_SO=chromosome | SO=protein_coding | is_pseudo=false	NaN	1	76.3506	1.76351	2673-1uM	DMSO
2673-1uM / DMSO	_NIEIGVAYDNKPFK_	207	Specific	transcript=PF3D7_0608500.1	1.38974	1.38974	2.34419e-25	5.30622e-23	99	transcript=PF3D7_0608500.1	NaN	gene=PF3D7_0608500 | organism=Plasmodium_falciparum_3D7 | gene_product=proteasome subunit alpha type-2, putative | transcript_product=proteasome subunit alpha type-2, putative | location=Pf3D7_06_v3:351780-352775(-) | protein_length=235 | sequence_SO=chromosome | SO=protein_coding | is_pseudo=false	NaN	1	162.031	2.62031	2673-1uM	DMSO
2673-1uM / DMSO	_YFDALTNADFLLITK_	257	Specific	transcript=PF3D7_0922600.1	0.396557	0.396557	2.53244e-25	5.67615e-23	54	transcript=PF3D7_0922600.1	NaN	gene=PF3D7_0922600 | organism=Plasmodium_falciparum_3D7 | gene_product=glutamine synthetase, putative | transcript_product=glutamine synthetase, putative | location=Pf3D7_09_v3:916603-918674(+) | protein_length=543 | sequence_SO=chromosome | SO=protein_coding | is_pseudo=false	NaN	1	31.6363	1.31636	2673-1uM	DMSO
2673-10uM / DMSO	_QQGEILVIGGDEEK_	272	Specific	transcript=PF3D7_0728000.1	1.43582	1.43582	2.92468e-25	6.49166e-23	45	transcript=PF3D7_0728000.1	NaN	gene=PF3D7_0728000 | organism=Plasmodium_falciparum_3D7 | gene_product=eukaryotic translation initiation factor 2 subunit alpha | transcript_product=eukaryotic translation initiation factor 2 subunit alpha | location=Pf3D7_07_v3:1191179-1192289(-) | protein_length=329 | sequence_SO=chromosome | SO=protein_coding | is_pseudo=false	NaN	1	170.535	2.70535	2673-10uM	DMSO
2673-10uM / DMSO	_IDMIDESEVLTIADEMHHIDK_	100	Specific	transcript=PF3D7_0621200.1	0.588153	0.588153	3.39382e-25	7.46053e-23	108	transcript=PF3D7_0621200.1	NaN	gene=PF3D7_0621200 | organism=Plasmodium_falciparum_3D7 | gene_product=pyridoxine biosynthesis protein PDX1 | transcript_product=pyridoxine biosynthesis protein PDX1 | location=Pf3D7_06_v3:871297-872202(-) | protein_length=301 | sequence_SO=chromosome | SO=protein_coding | is_pseudo=false	NaN	1	50.3321	1.50332	2673-10uM	DMSO
2673-10uM / DMSO	_SAVETSKPLFGEHY_	97	Unspecific	transcript=PF3D7_1012400.1	-0.589993	0.589993	3.81704e-25	8.31097e-23	99	transcript=PF3D7_1012400.1	NaN	gene=PF3D7_1012400 | organism=Plasmodium_falciparum_3D7 | gene_product=hypoxanthine-guanine phosphoribosyltransferase | transcript_product=hypoxanthine-guanine phosphoribosyltransferase | location=Pf3D7_10_v3:475327-476563(-) | protein_length=231 | sequence_SO=chromosome | SO=protein_coding | is_pseudo=false	NaN	1	-33.5654	0.664346	2673-10uM	DMSO
2673-1uM / DMSO	_LANSIGLIDAGYR_	101	Specific	transcript=PF3D7_1127100.1	1.03954	1.03954	4.46272e-25	9.53521e-23	54	transcript=PF3D7_1127100.1	NaN	gene=PF3D7_1127100 | organism=Plasmodium_falciparum_3D7 | gene_product=deoxyuridine 5'-triphosphate nucleotidohydrolase | transcript_product=deoxyuridine 5'-triphosphate nucleotidohydrolase | location=Pf3D7_11_v3:1060262-1060783(-) | protein_length=173 | sequence_SO=chromosome | SO=protein_coding | is_pseudo=false	NaN	1	105.558	2.05558	2673-1uM	DMSO
2673-1uM / DMSO	_ALDGNHVSLVSL_	39	Unspecific	transcript=PF3D7_1361900.1	-1.08633	1.08633	4.44649e-25	9.53521e-23	36	transcript=PF3D7_1361900.1	NaN	gene=PF3D7_1361900 | organism=Plasmodium_falciparum_3D7 | gene_product=proliferating cell nuclear antigen 1 | transcript_product=proliferating cell nuclear antigen 1 | location=Pf3D7_13_v3:2482472-2483296(-) | protein_length=274 | sequence_SO=chromosome | SO=protein_coding | is_pseudo=false	NaN	1	-52.9043	0.470957	2673-1uM	DMSO
2673-10uM / DMSO	_GPLLVQDVVFTDEMAHFDR_	48	Specific	P04040	0.688562	0.688562	4.67076e-25	9.8873e-23	54	P04040	CAT	Catalase	CATA_HUMAN	1	61.1676	1.61168	2673-10uM	DMSO
2673-10uM / DMSO	_EFVNHYFQLFNSGR_	14	Specific	transcript=PF3D7_1412300.1	0.589438	0.589438	5.24718e-25	1.10056e-22	90	transcript=PF3D7_1412300.1	NaN	gene=PF3D7_1412300 | organism=Plasmodium_falciparum_3D7 | gene_product=nuclear transport factor 2, putative | transcript_product=nuclear transport factor 2, putative | location=Pf3D7_14_v3:491494-492221(-) | protein_length=125 | sequence_SO=chromosome | SO=protein_coding | is_pseudo=false	NaN	1	50.466	1.50466	2673-10uM	DMSO
2673-1uM / DMSO	_KDDENVLNFLVLEK_	281	Specific	transcript=PF3D7_1454400.1	1.36796	1.36796	6.88907e-25	1.4318e-22	72	transcript=PF3D7_1454400.1	NaN	gene=PF3D7_1454400 | organism=Plasmodium_falciparum_3D7 | gene_product=aminopeptidase P | transcript_product=aminopeptidase P | location=Pf3D7_14_v3:2234143-2236476(+) | protein_length=777 | sequence_SO=chromosome | SO=protein_coding | is_pseudo=false	NaN	1	158.105	2.58105	2673-1uM	DMSO
2673-10uM / DMSO	_IHNVLLPK_	112	Specific-N	transcript=PF3D7_0617800.1	-0.601057	0.601057	8.71037e-25	1.79402e-22	108	transcript=PF3D7_0617800.1	NaN	gene=PF3D7_0617800 | organism=Plasmodium_falciparum_3D7 | gene_product=histone H2A | transcript_product=histone H2A | location=Pf3D7_06_v3:748416-748814(-) | protein_length=132 | sequence_SO=chromosome | SO=protein_coding | is_pseudo=false	NaN	1	-34.0729	0.659271	2673-10uM	DMSO
2673-10uM / DMSO	_NDEKPEAPVENVVEDLK_	12	Specific-N	transcript=PF3D7_1419700.1	-0.498899	0.498899	9.16378e-25	1.87056e-22	72	transcript=PF3D7_1419700.1	NaN	gene=PF3D7_1419700 | organism=Plasmodium_falciparum_3D7 | gene_product=conserved Plasmodium protein, unknown function | transcript_product=conserved Plasmodium protein, unknown function | location=Pf3D7_14_v3:820068-821597(+) | protein_length=509 | sequence_SO=chromosome | SO=protein_coding | is_pseudo=false	NaN	1	-29.2353	0.707647	2673-10uM	DMSO
2673-10uM / DMSO	_SGHQGAPIGC[Carbamidomethyl (C)]APIAHIL_	29	Specific-C	transcript=PF3D7_0610800.1	-0.430698	0.430698	1.04579e-24	2.11583e-22	108	transcript=PF3D7_0610800.1	NaN	gene=PF3D7_0610800 | organism=Plasmodium_falciparum_3D7 | gene_product=transketolase | transcript_product=transketolase | location=Pf3D7_06_v3:453671-455689(+) | protein_length=672 | sequence_SO=chromosome | SO=protein_coding | is_pseudo=false	NaN	1	-25.8097	0.741903	2673-10uM	DMSO
2673-1uM / DMSO	_GVSFTFGQDVVHNFLR_	220	Specific	transcript=PF3D7_1414400.1	1.14319	1.14319	1.29734e-24	2.60173e-22	45	transcript=PF3D7_1414400.1	NaN	gene=PF3D7_1414400 | organism=Plasmodium_falciparum_3D7 | gene_product=serine/threonine protein phosphatase PP1 | transcript_product=serine/threonine protein phosphatase PP1 | location=Pf3D7_14_v3:575496-577055(+) | protein_length=304 | sequence_SO=chromosome | SO=protein_coding | is_pseudo=false	NaN	1	120.869	2.20869	2673-1uM	DMSO
2673-1uM / DMSO	_AHLPAEFTPAVH_	112	Unspecific	P69905	-0.526358	0.526358	1.56381e-24	3.10885e-22	108	P69905	HBA1	Hemoglobin subunit alpha	HBA_HUMAN	1	-30.5695	0.694305	2673-1uM	DMSO
2673-10uM / DMSO	_NGPC[Carbamidomethyl (C)]LWYTEPSGTNTR_	151	Specific	transcript=PF3D7_0727400.1	0.619185	0.619185	1.78126e-24	3.51061e-22	54	transcript=PF3D7_0727400.1	NaN	gene=PF3D7_0727400 | organism=Plasmodium_falciparum_3D7 | gene_product=proteasome subunit alpha type-5, putative | transcript_product=proteasome subunit alpha type-5, putative | location=Pf3D7_07_v3:1162710-1163831(+) | protein_length=256 | sequence_SO=chromosome | SO=protein_coding | is_pseudo=false	NaN	1	53.6007	1.53601	2673-10uM	DMSO
2673-10uM / DMSO	_GADIIVATPGR_	501	Specific	transcript=PF3D7_0810600.1	-1.19156	1.19156	1.94433e-24	3.79925e-22	45	transcript=PF3D7_0810600.1	NaN	gene=PF3D7_0810600 | organism=Plasmodium_falciparum_3D7 | gene_product=ATP-dependent RNA helicase DBP1, putative | transcript_product=ATP-dependent RNA helicase DBP1, putative | location=Pf3D7_08_v3:541971-544796(+) | protein_length=941 | sequence_SO=chromosome | SO=protein_coding | is_pseudo=false	NaN	1	-56.217	0.43783	2673-10uM	DMSO
2673-10uM / DMSO	_EMTPEEIVNSRPFR_	127	Specific	transcript=PF3D7_0814200.1	-0.498948	0.498948	2.10896e-24	4.08603e-22	108	transcript=PF3D7_0814200.1	NaN	gene=PF3D7_0814200 | organism=Plasmodium_falciparum_3D7 | gene_product=DNA/RNA-binding protein Alba 1 | transcript_product=DNA/RNA-binding protein Alba 1 | location=Pf3D7_08_v3:687340-688086(+) | protein_length=248 | sequence_SO=chromosome | SO=protein_coding | is_pseudo=false	NaN	1	-29.2378	0.707622	2673-10uM	DMSO
2673-10uM / DMSO	_DFISSPHMIVIR_	243	Specific	transcript=PF3D7_1410600.1	0.406969	0.406969	2.34068e-24	4.49686e-22	99	transcript=PF3D7_1410600.1	NaN	gene=PF3D7_1410600 | organism=Plasmodium_falciparum_3D7 | gene_product=eukaryotic translation initiation factor 2 subunit gamma, putative | transcript_product=eukaryotic translation initiation factor 2 subunit gamma, putative | location=Pf3D7_14_v3:427191-428588(+) | protein_length=465 | sequence_SO=chromosome | SO=protein_coding | is_pseudo=false	NaN	1	32.5897	1.3259	2673-10uM	DMSO
2673-10uM / DMSO	_ESDTFVFNNIAVKPIPSLFR_	715	Specific	transcript=PF3D7_1311800.1	1.55749	1.55749	2.51155e-24	4.78492e-22	54	transcript=PF3D7_1311800.1	NaN	gene=PF3D7_1311800 | organism=Plasmodium_falciparum_3D7 | gene_product=M1-family alanyl aminopeptidase | transcript_product=M1-family alanyl aminopeptidase | location=Pf3D7_13_v3:501790-505047(+) | protein_length=1085 | sequence_SO=chromosome | SO=protein_coding | is_pseudo=false	NaN	1	194.34	2.9434	2673-10uM	DMSO
2673-1uM / DMSO	_ASSIVASLFLK_	553	Specific	transcript=PF3D7_1446200.1	1.25529	1.25529	2.61611e-24	4.94294e-22	54	transcript=PF3D7_1446200.1	NaN	gene=PF3D7_1446200 | organism=Plasmodium_falciparum_3D7 | gene_product=M17 leucyl aminopeptidase | transcript_product=M17 leucyl aminopeptidase | location=Pf3D7_14_v3:1893200-1895017(-) | protein_length=605 | sequence_SO=chromosome | SO=protein_coding | is_pseudo=false	NaN	1	138.714	2.38714	2673-1uM	DMSO
2673-10uM / DMSO	_ALDVMVSTFHK_	8	Specific	P26447	0.788119	0.788119	2.7389e-24	5.13251e-22	81	P26447	S100A4	Protein S100-A4	S10A4_HUMAN	1	72.6821	1.72682	2673-10uM	DMSO
2673-10uM / DMSO	_SGDPSQPLLPQHS_	181	Specific-C	P02730	-0.880064	0.880064	3.01744e-24	5.60851e-22	54	P02730	SLC4A1	Band 3 anion transport protein	B3AT_HUMAN	1	-45.6657	0.543343	2673-10uM	DMSO
2673-1uM / DMSO	_FHTDEILATVMLK_	61	Specific	transcript=PF3D7_0626700.1	0.567345	0.567345	3.40666e-24	6.28089e-22	54	transcript=PF3D7_0626700.1	NaN	gene=PF3D7_0626700 | organism=Plasmodium_falciparum_3D7 | gene_product=ATPase | transcript_product=ATPase | location=Pf3D7_06_v3:1075018-1076136(+) | protein_length=372 | sequence_SO=chromosome | SO=protein_coding | is_pseudo=false	NaN	1	48.1794	1.48179	2673-1uM	DMSO
2673-10uM / DMSO	_NVGDEGGFAPNIL_	206	Unspecific	P06733	-0.723519	0.723519	5.00469e-24	9.15339e-22	54	P06733	ENO1	Alpha-enolase	ENOA_HUMAN	1	-39.4381	0.605619	2673-10uM	DMSO
2673-1uM / DMSO	_ENSILPC[Carbamidomethyl (C)]LC[Carbamidomethyl (C)]NVHEK_	199	Specific	transcript=PF3D7_1015800.1	0.567421	0.567421	5.65381e-24	1.02585e-21	108	transcript=PF3D7_1015800.1	NaN	gene=PF3D7_1015800 | organism=Plasmodium_falciparum_3D7 | gene_product=ribonucleoside-diphosphate reductase small chain, putative | transcript_product=ribonucleoside-diphosphate reductase small chain, putative | location=Pf3D7_10_v3:633682-635286(+) | protein_length=335 | sequence_SO=chromosome | SO=protein_coding | is_pseudo=false	NaN	1	48.1872	1.48187	2673-1uM	DMSO
2673-10uM / DMSO	_FLSALAC[Carbamidomethyl (C)]HPNNFR_	231	Specific	transcript=PF3D7_1021600.1	0.696339	0.696339	7.6287e-24	1.37329e-21	99	transcript=PF3D7_1021600.1	NaN	gene=PF3D7_1021600 | organism=Plasmodium_falciparum_3D7 | gene_product=deoxyribose-phosphate aldolase, putative | transcript_product=deoxyribose-phosphate aldolase, putative | location=Pf3D7_10_v3:871095-871886(+) | protein_length=263 | sequence_SO=chromosome | SO=protein_coding | is_pseudo=false	NaN	1	62.0388	1.62039	2673-10uM	DMSO
2673-10uM / DMSO	_VGLLC[Carbamidomethyl (C)]TGDGGLSHER_	169	Specific-N	transcript=PF3D7_1029600.1	0.73054	0.73054	8.1731e-24	1.45979e-21	108	transcript=PF3D7_1029600.1	NaN	gene=PF3D7_1029600 | organism=Plasmodium_falciparum_3D7 | gene_product=adenosine deaminase | transcript_product=adenosine deaminase | location=Pf3D7_10_v3:1206302-1207405(+) | protein_length=367 | sequence_SO=chromosome | SO=protein_coding | is_pseudo=false	NaN	1	65.926	1.65926	2673-10uM	DMSO
2673-10uM / DMSO	_VNLYEVR_	73	Specific	transcript=PF3D7_0108000.1	1.49023	1.49023	1.16416e-23	2.06319e-21	45	transcript=PF3D7_0108000.1	NaN	gene=PF3D7_0108000 | organism=Plasmodium_falciparum_3D7 | gene_product=proteasome subunit beta type-3, putative | transcript_product=proteasome subunit beta type-3, putative | location=Pf3D7_01_v3:328431-329558(-) | protein_length=218 | sequence_SO=chromosome | SO=protein_coding | is_pseudo=false	NaN	1	180.934	2.80934	2673-10uM	DMSO
2673-10uM / DMSO	_KEVIDVIEEVKEE_	685	Specific-C	transcript=PF3D7_0220000.1	0.913854	0.913854	1.2166e-23	2.1232e-21	72	transcript=PF3D7_0220000.1	NaN	gene=PF3D7_0220000 | organism=Plasmodium_falciparum_3D7 | gene_product=liver stage antigen 3 | transcript_product=liver stage antigen 3 | location=Pf3D7_02_v3:796752-801586(+) | protein_length=1558 | sequence_SO=chromosome | SO=protein_coding | is_pseudo=false	NaN	1	88.4072	1.88407	2673-10uM	DMSO
2673-10uM / DMSO	_YVNQGGLELTGNSPEHSLFDKENR_	908	Specific	transcript=PF3D7_0915400.1	0.654302	0.654302	1.20993e-23	2.1232e-21	81	transcript=PF3D7_0915400.1	NaN	gene=PF3D7_0915400 | organism=Plasmodium_falciparum_3D7 | gene_product=ATP-dependent 6-phosphofructokinase | transcript_product=ATP-dependent 6-phosphofructokinase | location=Pf3D7_09_v3:650585-654841(-) | protein_length=1418 | sequence_SO=chromosome | SO=protein_coding | is_pseudo=false	NaN	1	57.3854	1.57385	2673-10uM	DMSO
2673-1uM / DMSO	_ITNYSGADGILIVTK_	174	Specific	transcript=PF3D7_1454400.1	1.28002	1.28002	1.37285e-23	2.37774e-21	81	transcript=PF3D7_1454400.1	NaN	gene=PF3D7_1454400 | organism=Plasmodium_falciparum_3D7 | gene_product=aminopeptidase P | transcript_product=aminopeptidase P | location=Pf3D7_14_v3:2234143-2236476(+) | protein_length=777 | sequence_SO=chromosome | SO=protein_coding | is_pseudo=false	NaN	1	142.842	2.42842	2673-1uM	DMSO
2673-10uM / DMSO	_DVPIVHTETK_	754	Specific	P11171	-1.04431	1.04431	1.8403e-23	3.16339e-21	90	P11171	EPB41	Protein 4.1	41_HUMAN	1	-51.5124	0.484876	2673-10uM	DMSO
2673-10uM / DMSO	_RQELMLNEMNTMLQEPNISNNLK_	1053	Specific	transcript=PF3D7_1311800.1	1.56625	1.56625	1.94536e-23	3.31901e-21	54	transcript=PF3D7_1311800.1	NaN	gene=PF3D7_1311800 | organism=Plasmodium_falciparum_3D7 | gene_product=M1-family alanyl aminopeptidase | transcript_product=M1-family alanyl aminopeptidase | location=Pf3D7_13_v3:501790-505047(+) | protein_length=1085 | sequence_SO=chromosome | SO=protein_coding | is_pseudo=false	NaN	1	196.133	2.96133	2673-10uM	DMSO
2673-10uM / DMSO	_NC[Carbamidomethyl (C)]PNAFIIV_	116	Specific-C	transcript=PF3D7_1324900.1	-0.816821	0.816821	1.97423e-23	3.34331e-21	54	transcript=PF3D7_1324900.1	NaN	gene=PF3D7_1324900 | organism=Plasmodium_falciparum_3D7 | gene_product=L-lactate dehydrogenase | transcript_product=L-lactate dehydrogenase | location=Pf3D7_13_v3:1041157-1042107(+) | protein_length=316 | sequence_SO=chromosome | SO=protein_coding | is_pseudo=false	NaN	1	-43.2308	0.567692	2673-10uM	DMSO
2673-10uM / DMSO	_AGTISGIFSK_	202	Specific	transcript=PF3D7_1408100.1	1.56766	1.56766	2.39218e-23	4.02132e-21	36	transcript=PF3D7_1408100.1	NaN	gene=PF3D7_1408100 | organism=Plasmodium_falciparum_3D7 | gene_product=plasmepsin III | transcript_product=plasmepsin III | location=Pf3D7_14_v3:297468-298823(+) | protein_length=451 | sequence_SO=chromosome | SO=protein_coding | is_pseudo=false	NaN	1	196.424	2.96424	2673-10uM	DMSO
2673-10uM / DMSO	_SGELADAQYLHELLTR_	55	Specific-N	transcript=PF3D7_0803800.1	0.800835	0.800835	2.64521e-23	4.41422e-21	54	transcript=PF3D7_0803800.1	NaN	gene=PF3D7_0803800 | organism=Plasmodium_falciparum_3D7 | gene_product=proteasome subunit beta type-4 | transcript_product=proteasome subunit beta type-4 | location=Pf3D7_08_v3:233467-234426(-) | protein_length=265 | sequence_SO=chromosome | SO=protein_coding | is_pseudo=false	NaN	1	74.2109	1.74211	2673-10uM	DMSO
2673-1uM / DMSO	_NFTLADFM_	335	Unspecific	transcript=PF3D7_1029600.1	-1.20825	1.20825	2.82479e-23	4.67973e-21	72	transcript=PF3D7_1029600.1	NaN	gene=PF3D7_1029600 | organism=Plasmodium_falciparum_3D7 | gene_product=adenosine deaminase | transcript_product=adenosine deaminase | location=Pf3D7_10_v3:1206302-1207405(+) | protein_length=367 | sequence_SO=chromosome | SO=protein_coding | is_pseudo=false	NaN	1	-56.7208	0.432792	2673-1uM	DMSO
2673-1uM / DMSO	_AAHLPAEFTPAVH_	111	Unspecific	P69905	-0.538957	0.538957	3.0046e-23	4.9418e-21	90	P69905	HBA1	Hemoglobin subunit alpha	HBA_HUMAN	1	-31.1732	0.688268	2673-1uM	DMSO
2673-10uM / DMSO	_LLSPNGSLTIIDR_	518	Specific-N	transcript=PF3D7_0525100.1	-0.614901	0.614901	3.43254e-23	5.60534e-21	45	transcript=PF3D7_0525100.1	NaN	gene=PF3D7_0525100 | organism=Plasmodium_falciparum_3D7 | gene_product=acyl-CoA synthetase | transcript_product=acyl-CoA synthetase | location=Pf3D7_05_v3:1041745-1043766(+) | protein_length=673 | sequence_SO=chromosome | SO=protein_coding | is_pseudo=false	NaN	1	-34.7025	0.652975	2673-10uM	DMSO
2673-10uM / DMSO	_VEC[Carbamidomethyl (C)]ALLIETLQK_	57	Specific-N	transcript=PF3D7_0520900.1	-1.22627	1.22627	3.79696e-23	6.15646e-21	81	transcript=PF3D7_0520900.1	NaN	gene=PF3D7_0520900 | organism=Plasmodium_falciparum_3D7 | gene_product=adenosylhomocysteinase | transcript_product=adenosylhomocysteinase | location=Pf3D7_05_v3:857038-858477(+) | protein_length=479 | sequence_SO=chromosome | SO=protein_coding | is_pseudo=false	NaN	1	-57.2578	0.427422	2673-10uM	DMSO
2673-10uM / DMSO	_VEESVAPSVEEIVVPTVEESVAE_	387451	Unspecific	transcript=PF3D7_0220000.1	-1.78062	1.78062	3.94834e-23	6.35683e-21	36	transcript=PF3D7_0220000.1	NaN	gene=PF3D7_0220000 | organism=Plasmodium_falciparum_3D7 | gene_product=liver stage antigen 3 | transcript_product=liver stage antigen 3 | location=Pf3D7_02_v3:796752-801586(+) | protein_length=1558 | sequence_SO=chromosome | SO=protein_coding | is_pseudo=false	NaN	1	-70.8941	0.291059	2673-10uM	DMSO
2673-10uM / DMSO	_LIYQGQC[Carbamidomethyl (C)]LLNEK_	50	Specific	transcript=PF3D7_0922100.1	1.19569	1.19569	4.19436e-23	6.65913e-21	45	transcript=PF3D7_0922100.1	NaN	gene=PF3D7_0922100 | organism=Plasmodium_falciparum_3D7 | gene_product=ubiquitin-like protein, putative | transcript_product=ubiquitin-like protein, putative | location=Pf3D7_09_v3:895415-900304(+) | protein_length=1542 | sequence_SO=chromosome | SO=protein_coding | is_pseudo=false	NaN	1	129.054	2.29054	2673-10uM	DMSO
2673-1uM / DMSO	_ALQENGVLLEGALLKPN_	223	Specific-C	transcript=PF3D7_1444800.1	0.705742	0.705742	4.19302e-23	6.65913e-21	54	transcript=PF3D7_1444800.1	NaN	gene=PF3D7_1444800 | organism=Plasmodium_falciparum_3D7 | gene_product=fructose-bisphosphate aldolase | transcript_product=fructose-bisphosphate aldolase | location=Pf3D7_14_v3:1844041-1845617(-) | protein_length=369 | sequence_SO=chromosome | SO=protein_coding | is_pseudo=false	NaN	1	63.0984	1.63098	2673-1uM	DMSO
2673-10uM / DMSO	_INDLINIC[Carbamidomethyl (C)]LLTNK_	180	Specific	transcript=PF3D7_1472600.1	1.59147	1.59147	4.22478e-23	6.66117e-21	54	transcript=PF3D7_1472600.1	NaN	gene=PF3D7_1472600 | organism=Plasmodium_falciparum_3D7 | gene_product=protein disulfide-isomerase | transcript_product=protein disulfide-isomerase | location=Pf3D7_14_v3:2962986-2965086(-) | protein_length=553 | sequence_SO=chromosome | SO=protein_coding | is_pseudo=false	NaN	1	201.357	3.01357	2673-10uM	DMSO
2673-10uM / DMSO	_LEDPHADAGFK_	811	Specific-N	transcript=PF3D7_1311800.1	-0.861122	0.861122	4.70228e-23	7.36325e-21	63	transcript=PF3D7_1311800.1	NaN	gene=PF3D7_1311800 | organism=Plasmodium_falciparum_3D7 | gene_product=M1-family alanyl aminopeptidase | transcript_product=M1-family alanyl aminopeptidase | location=Pf3D7_13_v3:501790-505047(+) | protein_length=1085 | sequence_SO=chromosome | SO=protein_coding | is_pseudo=false	NaN	1	-44.9476	0.550524	2673-10uM	DMSO
2673-10uM / DMSO	_AHAGEYGAEALER_	20	Specific-N	P69905	0.507283	0.507283	5.03508e-23	7.83074e-21	108	P69905	HBA1	Hemoglobin subunit alpha	HBA_HUMAN	1	42.1371	1.42137	2673-10uM	DMSO
2673-10uM / DMSO	_YADINNISSSVK_	541	Specific	transcript=PF3D7_1446200.1	1.40572	1.40572	5.16535e-23	7.97907e-21	54	transcript=PF3D7_1446200.1	NaN	gene=PF3D7_1446200 | organism=Plasmodium_falciparum_3D7 | gene_product=M17 leucyl aminopeptidase | transcript_product=M17 leucyl aminopeptidase | location=Pf3D7_14_v3:1893200-1895017(-) | protein_length=605 | sequence_SO=chromosome | SO=protein_coding | is_pseudo=false	NaN	1	164.951	2.64951	2673-10uM	DMSO
2673-1uM / DMSO	_TVEC[Carbamidomethyl (C)]ALLIETLQK_	56	Specific-N	transcript=PF3D7_0520900.1	-0.478524	0.478524	5.35934e-23	8.22317e-21	108	transcript=PF3D7_0520900.1	NaN	gene=PF3D7_0520900 | organism=Plasmodium_falciparum_3D7 | gene_product=adenosylhomocysteinase | transcript_product=adenosylhomocysteinase | location=Pf3D7_05_v3:857038-858477(+) | protein_length=479 | sequence_SO=chromosome | SO=protein_coding | is_pseudo=false	NaN	1	-28.2288	0.717712	2673-1uM	DMSO
2673-10uM / DMSO	_SQIENAISDVMGK_	22	Specific-N	transcript=PF3D7_1229400.1	-0.540633	0.540633	5.69161e-23	8.67477e-21	54	transcript=PF3D7_1229400.1	NaN	gene=PF3D7_1229400 | organism=Plasmodium_falciparum_3D7 | gene_product=macrophage migration inhibitory factor | transcript_product=macrophage migration inhibitory factor | location=Pf3D7_12_v3:1208912-1209542(+) | protein_length=116 | sequence_SO=chromosome | SO=protein_coding | is_pseudo=false	NaN	1	-31.2531	0.687469	2673-10uM	DMSO
2673-1uM / DMSO	_DVVVFPVSVHYDHTR_	38	Specific-N	transcript=PF3D7_1439900.1	-0.431005	0.431005	6.02353e-23	9.11986e-21	153	transcript=PF3D7_1439900.1	NaN	gene=PF3D7_1439900 | organism=Plasmodium_falciparum_3D7 | gene_product=triosephosphate isomerase | transcript_product=triosephosphate isomerase | location=Pf3D7_14_v3:1622576-1623612(+) | protein_length=248 | sequence_SO=chromosome | SO=protein_coding | is_pseudo=false	NaN	1	-25.8255	0.741745	2673-1uM	DMSO
2673-10uM / DMSO	_STEGVQETVTEHVEQN_	839	Unspecific	transcript=PF3D7_0220000.1	-0.636602	0.636602	6.19132e-23	9.31224e-21	54	transcript=PF3D7_0220000.1	NaN	gene=PF3D7_0220000 | organism=Plasmodium_falciparum_3D7 | gene_product=liver stage antigen 3 | transcript_product=liver stage antigen 3 | location=Pf3D7_02_v3:796752-801586(+) | protein_length=1558 | sequence_SO=chromosome | SO=protein_coding | is_pseudo=false	NaN	1	-35.6774	0.643226	2673-10uM	DMSO
2673-10uM / DMSO	_FFGDSSPF_	104	Unspecific	transcript=PF3D7_1211400.1	0.608801	0.608801	6.42968e-23	9.60754e-21	45	transcript=PF3D7_1211400.1	NaN	gene=PF3D7_1211400 | organism=Plasmodium_falciparum_3D7 | gene_product=heat shock protein DNAJ homologue Pfj4 | transcript_product=heat shock protein DNAJ homologue Pfj4 | location=Pf3D7_12_v3:505344-506662(+) | protein_length=244 | sequence_SO=chromosome | SO=protein_coding | is_pseudo=false	NaN	1	52.4992	1.52499	2673-10uM	DMSO
2673-10uM / DMSO	_LSFQEFMIVPVGAPSFK_	171	Specific	transcript=PF3D7_1015900.1	0.91629	0.91629	6.67153e-23	9.90419e-21	99	transcript=PF3D7_1015900.1	NaN	gene=PF3D7_1015900 | organism=Plasmodium_falciparum_3D7 | gene_product=enolase | transcript_product=enolase | location=Pf3D7_10_v3:637138-639011(+) | protein_length=446 | sequence_SO=chromosome | SO=protein_coding | is_pseudo=false	NaN	1	88.7256	1.88726	2673-10uM	DMSO
2673-1uM / DMSO	_VNLYEVR_	73	Specific	transcript=PF3D7_0108000.1	1.44768	1.44768	7.20596e-23	1.05614e-20	45	transcript=PF3D7_0108000.1	NaN	gene=PF3D7_0108000 | organism=Plasmodium_falciparum_3D7 | gene_product=proteasome subunit beta type-3, putative | transcript_product=proteasome subunit beta type-3, putative | location=Pf3D7_01_v3:328431-329558(-) | protein_length=218 | sequence_SO=chromosome | SO=protein_coding | is_pseudo=false	NaN	1	172.769	2.72769	2673-1uM	DMSO
2673-10uM / DMSO	_YSPSFMSFK_	132	Specific	transcript=PF3D7_1029600.1	1.01704	1.01704	7.20661e-23	1.05614e-20	45	transcript=PF3D7_1029600.1	NaN	gene=PF3D7_1029600 | organism=Plasmodium_falciparum_3D7 | gene_product=adenosine deaminase | transcript_product=adenosine deaminase | location=Pf3D7_10_v3:1206302-1207405(+) | protein_length=367 | sequence_SO=chromosome | SO=protein_coding | is_pseudo=false	NaN	1	102.377	2.02377	2673-10uM	DMSO
2673-1uM / DMSO	_ESQELIDLVK_	263	Specific-N	transcript=PF3D7_1029600.1	-0.703103	0.703103	7.28219e-23	1.06042e-20	54	transcript=PF3D7_1029600.1	NaN	gene=PF3D7_1029600 | organism=Plasmodium_falciparum_3D7 | gene_product=adenosine deaminase | transcript_product=adenosine deaminase | location=Pf3D7_10_v3:1206302-1207405(+) | protein_length=367 | sequence_SO=chromosome | SO=protein_coding | is_pseudo=false	NaN	1	-38.575	0.61425	2673-1uM	DMSO
2673-1uM / DMSO	_FGGSNEAYC[Carbamidomethyl (C)]FVR_	51	Specific	transcript=PF3D7_1229400.1	1.59984	1.59984	7.67332e-23	1.1103e-20	45	transcript=PF3D7_1229400.1	NaN	gene=PF3D7_1229400 | organism=Plasmodium_falciparum_3D7 | gene_product=macrophage migration inhibitory factor | transcript_product=macrophage migration inhibitory factor | location=Pf3D7_12_v3:1208912-1209542(+) | protein_length=116 | sequence_SO=chromosome | SO=protein_coding | is_pseudo=false	NaN	1	203.11	3.0311	2673-1uM	DMSO
2673-10uM / DMSO	_DDLSNEGIEIIDY_	133	Unspecific	transcript=PF3D7_0501000.1	0.788292	0.788292	7.81096e-23	1.12311e-20	45	transcript=PF3D7_0501000.1	NaN	gene=PF3D7_0501000 | organism=Plasmodium_falciparum_3D7 | gene_product=Plasmodium exported protein, unknown function | transcript_product=Plasmodium exported protein, unknown function | location=Pf3D7_05_v3:55841-56872(+) | protein_length=260 | sequence_SO=chromosome | SO=protein_coding | is_pseudo=false	NaN	1	72.7028	1.72703	2673-10uM	DMSO
2673-1uM / DMSO	_IYLLDSGGQYLHGT_	566	Unspecific	transcript=PF3D7_1454400.1	-0.607984	0.607984	8.03304e-23	1.14782e-20	54	transcript=PF3D7_1454400.1	NaN	gene=PF3D7_1454400 | organism=Plasmodium_falciparum_3D7 | gene_product=aminopeptidase P | transcript_product=aminopeptidase P | location=Pf3D7_14_v3:2234143-2236476(+) | protein_length=777 | sequence_SO=chromosome | SO=protein_coding | is_pseudo=false	NaN	1	-34.3887	0.656113	2673-1uM	DMSO
2673-10uM / DMSO	_FGDLSTPDAVMGNPK_	46	Specific-N	P68871	0.723511	0.723511	8.41393e-23	1.19478e-20	54	P68871	HBB	Hemoglobin subunit beta	HBB_HUMAN	1	65.1196	1.6512	2673-10uM	DMSO
2673-1uM / DMSO	_IDVWC[Carbamidomethyl (C)]FGYEGIDAVK_	195	Specific	transcript=PF3D7_0728000.1	1.66521	1.66521	8.96684e-23	1.26543e-20	45	transcript=PF3D7_0728000.1	NaN	gene=PF3D7_0728000 | organism=Plasmodium_falciparum_3D7 | gene_product=eukaryotic translation initiation factor 2 subunit alpha | transcript_product=eukaryotic translation initiation factor 2 subunit alpha | location=Pf3D7_07_v3:1191179-1192289(-) | protein_length=329 | sequence_SO=chromosome | SO=protein_coding | is_pseudo=false	NaN	1	217.159	3.17159	2673-1uM	DMSO
2673-1uM / DMSO	_LIDAGMDIC[Carbamidomethyl (C)]R_	58	Specific	transcript=PF3D7_0626800.1	0.611765	0.611765	1.02412e-22	1.4364e-20	54	transcript=PF3D7_0626800.1	NaN	gene=PF3D7_0626800 | organism=Plasmodium_falciparum_3D7 | gene_product=pyruvate kinase | transcript_product=pyruvate kinase | location=Pf3D7_06_v3:1078995-1081320(+) | protein_length=511 | sequence_SO=chromosome | SO=protein_coding | is_pseudo=false	NaN	1	52.8128	1.52813	2673-1uM	DMSO
2673-1uM / DMSO	_ATFSPIVTVEPR_	1126	Specific-N	P16157	-0.702986	0.702986	1.06496e-22	1.48458e-20	54	P16157	ANK1	Ankyrin-1	ANK1_HUMAN	1	-38.57	0.6143	2673-1uM	DMSO
2673-1uM / DMSO	_SGETEDVFIADLVVALR_	386	Specific	transcript=PF3D7_1015900.1	0.926968	0.926968	1.12659e-22	1.56097e-20	108	transcript=PF3D7_1015900.1	NaN	gene=PF3D7_1015900 | organism=Plasmodium_falciparum_3D7 | gene_product=enolase | transcript_product=enolase | location=Pf3D7_10_v3:637138-639011(+) | protein_length=446 | sequence_SO=chromosome | SO=protein_coding | is_pseudo=false	NaN	1	90.1276	1.90128	2673-1uM	DMSO
2673-10uM / DMSO	_FSTGIQNVSK_	59	Specific	transcript=PF3D7_1439900.1	0.582841	0.582841	1.18189e-22	1.62773e-20	54	transcript=PF3D7_1439900.1	NaN	gene=PF3D7_1439900 | organism=Plasmodium_falciparum_3D7 | gene_product=triosephosphate isomerase | transcript_product=triosephosphate isomerase | location=Pf3D7_14_v3:1622576-1623612(+) | protein_length=248 | sequence_SO=chromosome | SO=protein_coding | is_pseudo=false	NaN	1	49.7796	1.4978	2673-10uM	DMSO
2673-1uM / DMSO	_LTLADALVYAEK_	464	Specific	transcript=PF3D7_1446200.1	1.64476	1.64476	1.6234e-22	2.2224e-20	90	transcript=PF3D7_1446200.1	NaN	gene=PF3D7_1446200 | organism=Plasmodium_falciparum_3D7 | gene_product=M17 leucyl aminopeptidase | transcript_product=M17 leucyl aminopeptidase | location=Pf3D7_14_v3:1893200-1895017(-) | protein_length=605 | sequence_SO=chromosome | SO=protein_coding | is_pseudo=false	NaN	1	212.696	3.12696	2673-1uM	DMSO
2673-10uM / DMSO	_IRYESITDTQK_	45	Specific	transcript=PF3D7_0708400.1	-1.51312	1.51312	2.14055e-22	2.91293e-20	72	transcript=PF3D7_0708400.1	NaN	gene=PF3D7_0708400 | organism=Plasmodium_falciparum_3D7 | gene_product=heat shock protein 90 | transcript_product=heat shock protein 90 | location=Pf3D7_07_v3:381592-384614(+) | protein_length=745 | sequence_SO=chromosome | SO=protein_coding | is_pseudo=false	NaN	1	-64.9647	0.350353	2673-10uM	DMSO
2673-10uM / DMSO	_NSLENYC[Carbamidomethyl (C)]YGVK_	553	Specific	transcript=PF3D7_0818900.1	1.21616	1.21616	2.20772e-22	2.98656e-20	54	transcript=PF3D7_0818900.1	NaN	gene=PF3D7_0818900 | organism=Plasmodium_falciparum_3D7 | gene_product=heat shock protein 70 | transcript_product=heat shock protein 70 | location=Pf3D7_08_v3:860384-862417(+) | protein_length=677 | sequence_SO=chromosome | SO=protein_coding | is_pseudo=false	NaN	1	132.328	2.32328	2673-10uM	DMSO
2673-10uM / DMSO	_EIVGFEPF_	230	Unspecific	transcript=PF3D7_1408100.1	-0.886313	0.886313	2.37534e-22	3.19441e-20	72	transcript=PF3D7_1408100.1	NaN	gene=PF3D7_1408100 | organism=Plasmodium_falciparum_3D7 | gene_product=plasmepsin III | transcript_product=plasmepsin III | location=Pf3D7_14_v3:297468-298823(+) | protein_length=451 | sequence_SO=chromosome | SO=protein_coding | is_pseudo=false	NaN	1	-45.9005	0.540995	2673-10uM	DMSO
2673-1uM / DMSO	_NLHGLPGVVGGLA_	332;332	Unspecific	A0A0A0MQS8;Q02094	-0.340103	0.340103	2.58746e-22	3.45933e-20	54	A0A0A0MQS8;Q02094	RHAG	Ammonium transporter Rh type A	A0A0A0MQS8_HUMAN;RHAG_HUMAN	1	-21.0015	0.789985	2673-1uM	DMSO
2673-10uM / DMSO	_GYLTIGGIEER_	289	Specific	transcript=PF3D7_1408100.1	0.340573	0.340573	2.70751e-22	3.59879e-20	54	transcript=PF3D7_1408100.1	NaN	gene=PF3D7_1408100 | organism=Plasmodium_falciparum_3D7 | gene_product=plasmepsin III | transcript_product=plasmepsin III | location=Pf3D7_14_v3:297468-298823(+) | protein_length=451 | sequence_SO=chromosome | SO=protein_coding | is_pseudo=false	NaN	1	26.6259	1.26626	2673-10uM	DMSO
2673-10uM / DMSO	_SVGYKPDFVGFEIPDK_	171	Specific	P00492	0.594072	0.594072	2.92711e-22	3.86819e-20	54	P00492	HPRT1	Hypoxanthine-guanine phosphoribosyltransferase	HPRT_HUMAN	1	50.9501	1.5095	2673-10uM	DMSO
2673-10uM / DMSO	_KESTLHLVLR_	63,139,215,291,367;63	Specific-N	transcript=PF3D7_1211800.1;transcript=PF3D7_1365900.1	-0.582531	0.582531	3.9521e-22	5.1927e-20	108	transcript=PF3D7_1211800.1;transcript=PF3D7_1365900.1	NaN	gene=PF3D7_1211800 | organism=Plasmodium_falciparum_3D7 | gene_product=polyubiquitin | transcript_product=polyubiquitin | location=Pf3D7_12_v3:526109-527780(+) | protein_length=381 | sequence_SO=chromosome | SO=protein_coding | is_pseudo=false;gene=PF3D7_1365900 | organism=Plasmodium_falciparum_3D7 | gene_product=ubiquitin-60S ribosomal protein L40 | transcript_product=ubiquitin-60S ribosomal pro…	NaN	1	-33.2209	0.667791	2673-10uM	DMSO
2673-10uM / DMSO	_NIPYIIPGIT_	66	Unspecific	transcript=PF3D7_1140400.1	0.831003	0.831003	3.97545e-22	5.19353e-20	45	transcript=PF3D7_1140400.1	NaN	gene=PF3D7_1140400 | organism=Plasmodium_falciparum_3D7 | gene_product=conserved Plasmodium protein, unknown function | transcript_product=conserved Plasmodium protein, unknown function | location=Pf3D7_11_v3:1608006-1608609(+) | protein_length=167 | sequence_SO=chromosome | SO=protein_coding | is_pseudo=false	NaN	1	77.8922	1.77892	2673-10uM	DMSO
2673-1uM / DMSO	_NDHIIHLVVR_	70	Specific-N	transcript=PF3D7_0922100.1	-0.894229	0.894229	4.20034e-22	5.45614e-20	72	transcript=PF3D7_0922100.1	NaN	gene=PF3D7_0922100 | organism=Plasmodium_falciparum_3D7 | gene_product=ubiquitin-like protein, putative | transcript_product=ubiquitin-like protein, putative | location=Pf3D7_09_v3:895415-900304(+) | protein_length=1542 | sequence_SO=chromosome | SO=protein_coding | is_pseudo=false	NaN	1	-46.1965	0.538035	2673-1uM	DMSO
2673-10uM / DMSO	_NDIYPQAPVHIIVIPK_	100	Specific-N	transcript=PF3D7_0817500.1	0.357396	0.357396	4.4082e-22	5.69379e-20	99	transcript=PF3D7_0817500.1	NaN	gene=PF3D7_0817500 | organism=Plasmodium_falciparum_3D7 | gene_product=histidine triad nucleotide-binding protein 1 | transcript_product=histidine triad nucleotide-binding protein 1 | location=Pf3D7_08_v3:798777-800205(+) | protein_length=185 | sequence_SO=chromosome | SO=protein_coding | is_pseudo=false	NaN	1	28.1111	1.28111	2673-10uM	DMSO
2673-10uM / DMSO	_GLPISGSWQDLK_	117	Specific-N	transcript=PF3D7_0517300.1	-1.32758	1.32758	4.79849e-22	6.16309e-20	54	transcript=PF3D7_0517300.1	NaN	gene=PF3D7_0517300 | organism=Plasmodium_falciparum_3D7 | gene_product=serine/arginine-rich splicing factor 1 | transcript_product=serine/arginine-rich splicing factor 1 | location=Pf3D7_05_v3:724681-725751(-) | protein_length=298 | sequence_SO=chromosome | SO=protein_coding | is_pseudo=false	NaN	1	-60.1565	0.398435	2673-10uM	DMSO
2673-10uM / DMSO	_HNVMISTEWAAPNVLR_	196	Specific	Q13228	0.373271	0.373271	4.87298e-22	6.1772e-20	108	Q13228	SELENBP1	Selenium-binding protein 1	SBP1_HUMAN	1	29.5286	1.29529	2673-10uM	DMSO
2673-10uM / DMSO	_LIDAGMDIC[Carbamidomethyl (C)]R_	58	Specific	transcript=PF3D7_0626800.1	0.740175	0.740175	4.89053e-22	6.1772e-20	54	transcript=PF3D7_0626800.1	NaN	gene=PF3D7_0626800 | organism=Plasmodium_falciparum_3D7 | gene_product=pyruvate kinase | transcript_product=pyruvate kinase | location=Pf3D7_06_v3:1078995-1081320(+) | protein_length=511 | sequence_SO=chromosome | SO=protein_coding | is_pseudo=false	NaN	1	67.0378	1.67038	2673-10uM	DMSO
2673-10uM / DMSO	_KPLLIYENNYVSSTK_	55	Specific	transcript=PF3D7_1034900.1	0.595062	0.595062	4.85361e-22	6.1772e-20	90	transcript=PF3D7_1034900.1	NaN	gene=PF3D7_1034900 | organism=Plasmodium_falciparum_3D7 | gene_product=methionine--tRNA ligase | transcript_product=methionine--tRNA ligase | location=Pf3D7_10_v3:1383450-1386119(+) | protein_length=889 | sequence_SO=chromosome | SO=protein_coding | is_pseudo=false	NaN	1	51.0537	1.51054	2673-10uM	DMSO
2673-1uM / DMSO	_QELMLNEMNTMLQEPNISNNLK_	1054	Specific	transcript=PF3D7_1311800.1	1.09803	1.09803	5.13512e-22	6.4505e-20	45	transcript=PF3D7_1311800.1	NaN	gene=PF3D7_1311800 | organism=Plasmodium_falciparum_3D7 | gene_product=M1-family alanyl aminopeptidase | transcript_product=M1-family alanyl aminopeptidase | location=Pf3D7_13_v3:501790-505047(+) | protein_length=1085 | sequence_SO=chromosome | SO=protein_coding | is_pseudo=false	NaN	1	114.062	2.14062	2673-1uM	DMSO
2673-10uM / DMSO	_NMVLSNEPGYYMK_	670	Specific	transcript=PF3D7_1454400.1	1.32446	1.32446	5.28922e-22	6.60776e-20	54	transcript=PF3D7_1454400.1	NaN	gene=PF3D7_1454400 | organism=Plasmodium_falciparum_3D7 | gene_product=aminopeptidase P | transcript_product=aminopeptidase P | location=Pf3D7_14_v3:2234143-2236476(+) | protein_length=777 | sequence_SO=chromosome | SO=protein_coding | is_pseudo=false	NaN	1	150.439	2.50439	2673-10uM	DMSO
2673-10uM / DMSO	_AHIVGIDIFTGR_	56	Specific	transcript=PF3D7_1204300.1	-1.21209	1.21209	5.55756e-22	6.90527e-20	90	transcript=PF3D7_1204300.1	NaN	gene=PF3D7_1204300 | organism=Plasmodium_falciparum_3D7 | gene_product=eukaryotic translation initiation factor 5A | transcript_product=eukaryotic translation initiation factor 5A | location=Pf3D7_12_v3:205491-205976(-) | protein_length=161 | sequence_SO=chromosome | SO=protein_coding | is_pseudo=false	NaN	1	-56.8357	0.431643	2673-10uM	DMSO
2673-10uM / DMSO	_NLVAYISK_	60	Specific	transcript=PF3D7_1366500.1	0.674399	0.674399	6.42364e-22	7.93823e-20	45	transcript=PF3D7_1366500.1	NaN	gene=PF3D7_1366500 | organism=Plasmodium_falciparum_3D7 | gene_product=nucleoside diphosphate kinase | transcript_product=nucleoside diphosphate kinase | location=Pf3D7_13_v3:2661573-2662022(+) | protein_length=149 | sequence_SO=chromosome | SO=protein_coding | is_pseudo=false	NaN	1	59.5932	1.59593	2673-10uM	DMSO
2673-10uM / DMSO	_NNVEVTFPDDNINEK_	140	Specific-N	transcript=PF3D7_0402400.1	0.618002	0.618002	6.78958e-22	8.34535e-20	54	transcript=PF3D7_0402400.1	NaN	gene=PF3D7_0402400 | organism=Plasmodium_falciparum_3D7 | gene_product=Plasmodium exported protein, unknown function | transcript_product=Plasmodium exported protein, unknown function | location=Pf3D7_04_v3:147490-148380(-) | protein_length=254 | sequence_SO=chromosome | SO=protein_coding | is_pseudo=false	NaN	1	53.4748	1.53475	2673-10uM	DMSO
2673-10uM / DMSO	_YTAINLLHVK_	244	Specific-N	transcript=PF3D7_1029600.1	-0.629291	0.629291	7.12045e-22	8.70523e-20	108	transcript=PF3D7_1029600.1	NaN	gene=PF3D7_1029600 | organism=Plasmodium_falciparum_3D7 | gene_product=adenosine deaminase | transcript_product=adenosine deaminase | location=Pf3D7_10_v3:1206302-1207405(+) | protein_length=367 | sequence_SO=chromosome | SO=protein_coding | is_pseudo=false	NaN	1	-35.3506	0.646494	2673-10uM	DMSO
2673-10uM / DMSO	_AGEDVSIPNLNSL_	231	Unspecific	transcript=PF3D7_1029600.1	-1.341	1.341	8.16087e-22	9.92414e-20	36	transcript=PF3D7_1029600.1	NaN	gene=PF3D7_1029600 | organism=Plasmodium_falciparum_3D7 | gene_product=adenosine deaminase | transcript_product=adenosine deaminase | location=Pf3D7_10_v3:1206302-1207405(+) | protein_length=367 | sequence_SO=chromosome | SO=protein_coding | is_pseudo=false	NaN	1	-60.5254	0.394746	2673-10uM	DMSO
2673-10uM / DMSO	_SVIDEIVEEDELDTK_	3457	Specific-N	transcript=PF3D7_1149000.1	0.834514	0.834514	8.48303e-22	1.02613e-19	54	transcript=PF3D7_1149000.1	NaN	gene=PF3D7_1149000 | organism=Plasmodium_falciparum_3D7 | gene_product=antigen 332, DBL-like protein | transcript_product=antigen 332, DBL-like protein | location=Pf3D7_11_v3:1950210-1968726(+) | protein_length=6093 | sequence_SO=chromosome | SO=protein_coding | is_pseudo=false	NaN	1	78.3256	1.78326	2673-10uM	DMSO
2673-10uM / DMSO	_NIAVKPIPSLFR_	723	Specific-N	transcript=PF3D7_1311800.1	-0.37098	0.37098	9.70818e-22	1.16815e-19	108	transcript=PF3D7_1311800.1	NaN	gene=PF3D7_1311800 | organism=Plasmodium_falciparum_3D7 | gene_product=M1-family alanyl aminopeptidase | transcript_product=M1-family alanyl aminopeptidase | location=Pf3D7_13_v3:501790-505047(+) | protein_length=1085 | sequence_SO=chromosome | SO=protein_coding | is_pseudo=false	NaN	1	-22.6743	0.773257	2673-10uM	DMSO
2673-1uM / DMSO	_GLSDSRPIEFK_	230	Specific-N	transcript=PF3D7_1361900.1	-0.478736	0.478736	1.09206e-21	1.30716e-19	81	transcript=PF3D7_1361900.1	NaN	gene=PF3D7_1361900 | organism=Plasmodium_falciparum_3D7 | gene_product=proliferating cell nuclear antigen 1 | transcript_product=proliferating cell nuclear antigen 1 | location=Pf3D7_13_v3:2482472-2483296(-) | protein_length=274 | sequence_SO=chromosome | SO=protein_coding | is_pseudo=false	NaN	1	-28.2394	0.717606	2673-1uM	DMSO
2673-10uM / DMSO	_GNVDVIKL_	321	Unspecific	transcript=PF3D7_0520900.1	0.890408	0.890408	1.12481e-21	1.33934e-19	81	transcript=PF3D7_0520900.1	NaN	gene=PF3D7_0520900 | organism=Plasmodium_falciparum_3D7 | gene_product=adenosylhomocysteinase | transcript_product=adenosylhomocysteinase | location=Pf3D7_05_v3:857038-858477(+) | protein_length=479 | sequence_SO=chromosome | SO=protein_coding | is_pseudo=false	NaN	1	85.37	1.8537	2673-10uM	DMSO
2673-1uM / DMSO	_NNIAVKPIPSLFR_	722	Specific-N	transcript=PF3D7_1311800.1	-0.502885	0.502885	1.19881e-21	1.42006e-19	108	transcript=PF3D7_1311800.1	NaN	gene=PF3D7_1311800 | organism=Plasmodium_falciparum_3D7 | gene_product=M1-family alanyl aminopeptidase | transcript_product=M1-family alanyl aminopeptidase | location=Pf3D7_13_v3:501790-505047(+) | protein_length=1085 | sequence_SO=chromosome | SO=protein_coding | is_pseudo=false	NaN	1	-29.4306	0.705694	2673-1uM	DMSO
2673-1uM / DMSO	_LMSQYIEFVADR_	279	Specific	transcript=PF3D7_1405600.1	0.985717	0.985717	1.27157e-21	1.49848e-19	54	transcript=PF3D7_1405600.1	NaN	gene=PF3D7_1405600 | organism=Plasmodium_falciparum_3D7 | gene_product=ribonucleoside-diphosphate reductase small chain, putative | transcript_product=ribonucleoside-diphosphate reductase small chain, putative | location=Pf3D7_14_v3:193216-194265(-) | protein_length=349 | sequence_SO=chromosome | SO=protein_coding | is_pseudo=false	NaN	1	98.0298	1.9803	2673-1uM	DMSO
2673-10uM / DMSO	_KLPQSVKPGNIILIADGSVSC[Carbamidomethyl (C)]K_	147	Specific	transcript=PF3D7_0626800.1	0.538241	0.538241	1.30918e-21	1.5349e-19	108	transcript=PF3D7_0626800.1	NaN	gene=PF3D7_0626800 | organism=Plasmodium_falciparum_3D7 | gene_product=pyruvate kinase | transcript_product=pyruvate kinase | location=Pf3D7_06_v3:1078995-1081320(+) | protein_length=511 | sequence_SO=chromosome | SO=protein_coding | is_pseudo=false	NaN	1	45.2201	1.4522	2673-10uM	DMSO
2673-10uM / DMSO	_LLDFSLLTNQEIK_	721	Specific	transcript=PF3D7_1454400.1	0.666113	0.666113	1.33734e-21	1.55991e-19	54	transcript=PF3D7_1454400.1	NaN	gene=PF3D7_1454400 | organism=Plasmodium_falciparum_3D7 | gene_product=aminopeptidase P | transcript_product=aminopeptidase P | location=Pf3D7_14_v3:2234143-2236476(+) | protein_length=777 | sequence_SO=chromosome | SO=protein_coding | is_pseudo=false	NaN	1	58.6792	1.58679	2673-10uM	DMSO
2673-10uM / DMSO	_AIEELQNIFNK_	218	Specific-N	transcript=PF3D7_0306200.1	-0.35152	0.35152	1.35716e-21	1.5698e-19	45	transcript=PF3D7_0306200.1	NaN	gene=PF3D7_0306200 | organism=Plasmodium_falciparum_3D7 | gene_product=activator of Hsp90 ATPase | transcript_product=activator of Hsp90 ATPase | location=Pf3D7_03_v3:292943-294548(+) | protein_length=349 | sequence_SO=chromosome | SO=protein_coding | is_pseudo=false	NaN	1	-21.6242	0.783758	2673-10uM	DMSO
2673-1uM / DMSO	_LIAPPQYVIVTSC[Carbamidomethyl (C)]HDK_	229	Specific	transcript=PF3D7_0728000.1	1.42257	1.42257	1.35955e-21	1.5698e-19	63	transcript=PF3D7_0728000.1	NaN	gene=PF3D7_0728000 | organism=Plasmodium_falciparum_3D7 | gene_product=eukaryotic translation initiation factor 2 subunit alpha | transcript_product=eukaryotic translation initiation factor 2 subunit alpha | location=Pf3D7_07_v3:1191179-1192289(-) | protein_length=329 | sequence_SO=chromosome | SO=protein_coding | is_pseudo=false	NaN	1	168.062	2.68062	2673-1uM	DMSO
2673-10uM / DMSO	_VSVVDLTC[Carbamidomethyl (C)]R_	240	Specific-N	P04406	0.352596	0.352596	1.47974e-21	1.69999e-19	54	P04406	GAPDH	Glyceraldehyde-3-phosphate dehydrogenase	G3P_HUMAN	1	27.6856	1.27686	2673-10uM	DMSO
2673-10uM / DMSO	_AAPGSMIDLMK_	387	Specific	transcript=PF3D7_1446200.1	1.05303	1.05303	1.54994e-21	1.77174e-19	45	transcript=PF3D7_1446200.1	NaN	gene=PF3D7_1446200 | organism=Plasmodium_falciparum_3D7 | gene_product=M17 leucyl aminopeptidase | transcript_product=M17 leucyl aminopeptidase | location=Pf3D7_14_v3:1893200-1895017(-) | protein_length=605 | sequence_SO=chromosome | SO=protein_coding | is_pseudo=false	NaN	1	107.488	2.07488	2673-10uM	DMSO
2673-10uM / DMSO	_MNVETEHIGSVIGK_	880	Specific-N	transcript=PF3D7_1011800.1	-0.754858	0.754858	1.64061e-21	1.86606e-19	81	transcript=PF3D7_1011800.1	NaN	gene=PF3D7_1011800 | organism=Plasmodium_falciparum_3D7 | gene_product=PRE-binding protein | transcript_product=PRE-binding protein | location=Pf3D7_10_v3:455398-458817(+) | protein_length=1139 | sequence_SO=chromosome | SO=protein_coding | is_pseudo=false	NaN	1	-40.7395	0.592605	2673-10uM	DMSO
2673-1uM / DMSO	_C[Carbamidomethyl (C)]INSIDMINLTK_	328	Specific	transcript=PF3D7_1354500.1	0.459708	0.459708	1.65124e-21	1.86885e-19	54	transcript=PF3D7_1354500.1	NaN	gene=PF3D7_1354500 | organism=Plasmodium_falciparum_3D7 | gene_product=adenylosuccinate synthetase | transcript_product=adenylosuccinate synthetase | location=Pf3D7_13_v3:2174346-2175797(+) | protein_length=442 | sequence_SO=chromosome | SO=protein_coding | is_pseudo=false	NaN	1	37.5263	1.37526	2673-1uM	DMSO
2673-10uM / DMSO	_VPTANVSVVDLTC[Carbamidomethyl (C)]R_	235	Specific	P04406	1.06035	1.06035	1.72828e-21	1.94373e-19	81	P04406	GAPDH	Glyceraldehyde-3-phosphate dehydrogenase	G3P_HUMAN	1	108.543	2.08543	2673-10uM	DMSO
2673-10uM / DMSO	_AVLPMLNYELSDEIK_	719	Specific-N	transcript=PF3D7_0524000.1	0.548951	0.548951	1.73441e-21	1.94373e-19	45	transcript=PF3D7_0524000.1	NaN	gene=PF3D7_0524000 | organism=Plasmodium_falciparum_3D7 | gene_product=karyopherin beta | transcript_product=karyopherin beta | location=Pf3D7_05_v3:998753-1002124(+) | protein_length=1123 | sequence_SO=chromosome | SO=protein_coding | is_pseudo=false	NaN	1	46.3021	1.46302	2673-10uM	DMSO
2673-10uM / DMSO	_YALNALSPHISEETLNFHYNK_	10	Specific	transcript=PF3D7_0814900.1	0.643467	0.643467	1.86783e-21	2.07293e-19	81	transcript=PF3D7_0814900.1	NaN	gene=PF3D7_0814900 | organism=Plasmodium_falciparum_3D7 | gene_product=superoxide dismutase [Fe] | transcript_product=superoxide dismutase [Fe] | location=Pf3D7_08_v3:708228-708824(+) | protein_length=198 | sequence_SO=chromosome | SO=protein_coding | is_pseudo=false	NaN	1	56.2079	1.56208	2673-10uM	DMSO
2673-10uM / DMSO	_SSNTHHFLIYPINPMPK_	113	Specific	transcript=PF3D7_1104400.1	0.974167	0.974167	1.92193e-21	2.12267e-19	63	transcript=PF3D7_1104400.1	NaN	gene=PF3D7_1104400 | organism=Plasmodium_falciparum_3D7 | gene_product=thioredoxin-like mero protein | transcript_product=thioredoxin-like mero protein | location=Pf3D7_11_v3:196767-198355(+) | protein_length=424 | sequence_SO=chromosome | SO=protein_coding | is_pseudo=false	NaN	1	96.4506	1.96451	2673-10uM	DMSO
2673-1uM / DMSO	_SVHGC[Carbamidomethyl (C)]IPLILQ_	224	Specific-C	transcript=PF3D7_0524000.1	-0.560877	0.560877	1.94369e-21	2.13637e-19	54	transcript=PF3D7_0524000.1	NaN	gene=PF3D7_0524000 | organism=Plasmodium_falciparum_3D7 | gene_product=karyopherin beta | transcript_product=karyopherin beta | location=Pf3D7_05_v3:998753-1002124(+) | protein_length=1123 | sequence_SO=chromosome | SO=protein_coding | is_pseudo=false	NaN	1	-32.211	0.67789	2673-1uM	DMSO
2673-1uM / DMSO	_FNTANDDNVTQVR_	432	Specific	P04040	1.54223	1.54223	2.23885e-21	2.44834e-19	45	P04040	CAT	Catalase	CATA_HUMAN	1	191.245	2.91245	2673-1uM	DMSO
2673-10uM / DMSO	_EC[Carbamidomethyl (C)]ANFTTNVSAR_	1199	Specific-N	P16157	0.970691	0.970691	2.24893e-21	2.44834e-19	45	P16157	ANK1	Ankyrin-1	ANK1_HUMAN	1	95.978	1.95978	2673-10uM	DMSO
2673-10uM / DMSO	_FVNPIVVGF_	106	Unspecific	transcript=PF3D7_0108000.1	-1.43348	1.43348	2.27912e-21	2.46945e-19	54	transcript=PF3D7_0108000.1	NaN	gene=PF3D7_0108000 | organism=Plasmodium_falciparum_3D7 | gene_product=proteasome subunit beta type-3, putative | transcript_product=proteasome subunit beta type-3, putative | location=Pf3D7_01_v3:328431-329558(-) | protein_length=218 | sequence_SO=chromosome | SO=protein_coding | is_pseudo=false	NaN	1	-62.9764	0.370236	2673-10uM	DMSO
2673-10uM / DMSO	_VAQHVPTLHPHSEELVVGK_	45	Specific	transcript=PF3D7_0416800.1	-0.624844	0.624844	2.31152e-21	2.49273e-19	144	transcript=PF3D7_0416800.1	NaN	gene=PF3D7_0416800 | organism=Plasmodium_falciparum_3D7 | gene_product=small GTP-binding protein sar1 | transcript_product=small GTP-binding protein sar1 | location=Pf3D7_04_v3:729962-731223(+) | protein_length=192 | sequence_SO=chromosome | SO=protein_coding | is_pseudo=false	NaN	1	-35.151	0.64849	2673-10uM	DMSO
2673-1uM / DMSO	_TPVISSPMDTVTGH_	50	Specific-C	transcript=PF3D7_0920800.1	-0.382888	0.382888	2.34013e-21	2.51174e-19	54	transcript=PF3D7_0920800.1	NaN	gene=PF3D7_0920800 | organism=Plasmodium_falciparum_3D7 | gene_product=inosine-5'-monophosphate dehydrogenase | transcript_product=inosine-5'-monophosphate dehydrogenase | location=Pf3D7_09_v3:852525-854057(-) | protein_length=510 | sequence_SO=chromosome | SO=protein_coding | is_pseudo=false	NaN	1	-23.3099	0.766901	2673-1uM	DMSO
2673-10uM / DMSO	_IAPFYEEC[Carbamidomethyl (C)]SK_	36	Specific	transcript=PF3D7_1457200.1	0.82576	0.82576	2.43217e-21	2.59833e-19	54	transcript=PF3D7_1457200.1	NaN	gene=PF3D7_1457200 | organism=Plasmodium_falciparum_3D7 | gene_product=thioredoxin 1 | transcript_product=thioredoxin 1 | location=Pf3D7_14_v3:2343640-2344218(-) | protein_length=104 | sequence_SO=chromosome | SO=protein_coding | is_pseudo=false	NaN	1	77.2468	1.77247	2673-10uM	DMSO
2673-10uM / DMSO	_LSLINYSNPSEK_	379	Specific	transcript=PF3D7_0922600.1	0.629045	0.629045	2.72934e-21	2.90224e-19	54	transcript=PF3D7_0922600.1	NaN	gene=PF3D7_0922600 | organism=Plasmodium_falciparum_3D7 | gene_product=glutamine synthetase, putative | transcript_product=glutamine synthetase, putative | location=Pf3D7_09_v3:916603-918674(+) | protein_length=543 | sequence_SO=chromosome | SO=protein_coding | is_pseudo=false	NaN	1	54.6541	1.54654	2673-10uM	DMSO
2673-1uM / DMSO	_QLTNTHPVATPVNWK_	165	Specific-N	transcript=PF3D7_0802200.1	-0.773894	0.773894	2.83514e-21	3.00078e-19	54	transcript=PF3D7_0802200.1	NaN	gene=PF3D7_0802200 | organism=Plasmodium_falciparum_3D7 | gene_product=1-cys peroxiredoxin | transcript_product=1-cys peroxiredoxin | location=Pf3D7_08_v3:165416-166078(+) | protein_length=220 | sequence_SO=chromosome | SO=protein_coding | is_pseudo=false	NaN	1	-41.5163	0.584837	2673-1uM	DMSO
2673-10uM / DMSO	_SVIALHNLINNK_	279	Specific	transcript=PF3D7_0912900.1	0.439882	0.439882	2.84987e-21	3.00248e-19	90	transcript=PF3D7_0912900.1	NaN	gene=PF3D7_0912900 | organism=Plasmodium_falciparum_3D7 | gene_product=26S proteasome regulatory subunit RPN8, putative | transcript_product=26S proteasome regulatory subunit RPN8, putative | location=Pf3D7_09_v3:567283-568640(+) | protein_length=338 | sequence_SO=chromosome | SO=protein_coding | is_pseudo=false	NaN	1	35.6493	1.35649	2673-10uM	DMSO
2673-10uM / DMSO	_IIIQDGQENNLDEK_	42	Specific	transcript=PF3D7_0513600.1	-0.63334	0.63334	3.12115e-21	3.2732e-19	45	transcript=PF3D7_0513600.1	NaN	gene=PF3D7_0513600 | organism=Plasmodium_falciparum_3D7 | gene_product=deoxyribodipyrimidine photo-lyase, putative | transcript_product=deoxyribodipyrimidine photo-lyase, putative | location=Pf3D7_05_v3:574941-578505(-) | protein_length=1113 | sequence_SO=chromosome | SO=protein_coding | is_pseudo=false	NaN	1	-35.5318	0.644682	2673-10uM	DMSO
2673-10uM / DMSO	_EVYDFILLHK_	158	Specific	transcript=PF3D7_1437200.1	-0.552759	0.552759	3.75555e-21	3.92052e-19	99	transcript=PF3D7_1437200.1	NaN	gene=PF3D7_1437200 | organism=Plasmodium_falciparum_3D7 | gene_product=ribonucleoside-diphosphate reductase large subunit, putative | transcript_product=ribonucleoside-diphosphate reductase large subunit, putative | location=Pf3D7_14_v3:1507359-1510089(-) | protein_length=847 | sequence_SO=chromosome | SO=protein_coding | is_pseudo=false	NaN	1	-31.8285	0.681715	2673-10uM	DMSO
2673-10uM / DMSO	_LDEHNC[Carbamidomethyl (C)]LAFAGLNADAR_	65	Specific	transcript=PF3D7_1353900.1	1.81021	1.81021	3.87682e-21	4.02872e-19	63	transcript=PF3D7_1353900.1	NaN	gene=PF3D7_1353900 | organism=Plasmodium_falciparum_3D7 | gene_product=proteasome subunit alpha type-7, putative | transcript_product=proteasome subunit alpha type-7, putative | location=Pf3D7_13_v3:2154162-2155217(+) | protein_length=241 | sequence_SO=chromosome | SO=protein_coding | is_pseudo=false	NaN	1	250.693	3.50693	2673-10uM	DMSO
2673-10uM / DMSO	_AHLPAEFTPAVH_	112	Unspecific	P69905	-0.515921	0.515921	4.05474e-21	4.19454e-19	108	P69905	HBA1	Hemoglobin subunit alpha	HBA_HUMAN	1	-30.0654	0.699346	2673-10uM	DMSO
2673-10uM / DMSO	_VNIQDIHSIEVLGGSTR_	360	Specific	transcript=PF3D7_0708800.1	0.916788	0.916788	4.07461e-21	4.19612e-19	90	transcript=PF3D7_0708800.1	NaN	gene=PF3D7_0708800 | organism=Plasmodium_falciparum_3D7 | gene_product=heat shock protein 110 | transcript_product=heat shock protein 110 | location=Pf3D7_07_v3:395711-398332(+) | protein_length=873 | sequence_SO=chromosome | SO=protein_coding | is_pseudo=false	NaN	1	88.7907	1.88791	2673-10uM	DMSO
2673-1uM / DMSO	_DLANVLSFGEAK_	133	Specific	transcript=PF3D7_1408100.1	1.79778	1.79778	4.50147e-21	4.61491e-19	54	transcript=PF3D7_1408100.1	NaN	gene=PF3D7_1408100 | organism=Plasmodium_falciparum_3D7 | gene_product=plasmepsin III | transcript_product=plasmepsin III | location=Pf3D7_14_v3:297468-298823(+) | protein_length=451 | sequence_SO=chromosome | SO=protein_coding | is_pseudo=false	NaN	1	247.686	3.47686	2673-1uM	DMSO
2673-1uM / DMSO	_LPDC[Carbamidomethyl (C)]ANSPHLVMA_	396	Specific-C	transcript=PF3D7_0922600.1	-0.522998	0.522998	6.30136e-21	6.43132e-19	45	transcript=PF3D7_0922600.1	NaN	gene=PF3D7_0922600 | organism=Plasmodium_falciparum_3D7 | gene_product=glutamine synthetase, putative | transcript_product=glutamine synthetase, putative | location=Pf3D7_09_v3:916603-918674(+) | protein_length=543 | sequence_SO=chromosome | SO=protein_coding | is_pseudo=false	NaN	1	-30.4076	0.695924	2673-1uM	DMSO
2673-10uM / DMSO	_SINNNNTALC[Carbamidomethyl (C)]LEC[Carbamidomethyl (C)]K_	30	Specific	transcript=PF3D7_0317000.1	0.578057	0.578057	6.43802e-21	6.5416e-19	54	transcript=PF3D7_0317000.1	NaN	gene=PF3D7_0317000 | organism=Plasmodium_falciparum_3D7 | gene_product=proteasome subunit alpha type-3, putative | transcript_product=proteasome subunit alpha type-3, putative | location=Pf3D7_03_v3:682795-683685(-) | protein_length=252 | sequence_SO=chromosome | SO=protein_coding | is_pseudo=false	NaN	1	49.2837	1.49284	2673-10uM	DMSO
2673-10uM / DMSO	_DAEVFSLLSTVFK_	974	Specific	transcript=PF3D7_0302900.1	0.475328	0.475328	6.54202e-21	6.61786e-19	54	transcript=PF3D7_0302900.1	NaN	gene=PF3D7_0302900 | organism=Plasmodium_falciparum_3D7 | gene_product=exportin-1, putative | transcript_product=exportin-1, putative | location=Pf3D7_03_v3:152168-156146(-) | protein_length=1254 | sequence_SO=chromosome | SO=protein_coding | is_pseudo=false	NaN	1	39.0234	1.39023	2673-10uM	DMSO
2673-10uM / DMSO	_ATFSPIVTVEPR_	1126	Specific-N	P16157	-0.54727	0.54727	6.81919e-21	6.86786e-19	54	P16157	ANK1	Ankyrin-1	ANK1_HUMAN	1	-31.5686	0.684314	2673-10uM	DMSO
2673-10uM / DMSO	_FDLSHGSAQ_	47	Unspecific	P69905	-0.485004	0.485004	6.9615e-21	6.98043e-19	108	P69905	HBA1	Hemoglobin subunit alpha	HBA_HUMAN	1	-28.5505	0.714495	2673-10uM	DMSO
2673-10uM / DMSO	_C[Carbamidomethyl (C)]ILPSVDNADLPK_	185	Specific-N	transcript=PF3D7_0802200.1	-0.828759	0.828759	7.00146e-21	6.98984e-19	36	transcript=PF3D7_0802200.1	NaN	gene=PF3D7_0802200 | organism=Plasmodium_falciparum_3D7 | gene_product=1-cys peroxiredoxin | transcript_product=1-cys peroxiredoxin | location=Pf3D7_08_v3:165416-166078(+) | protein_length=220 | sequence_SO=chromosome | SO=protein_coding | is_pseudo=false	NaN	1	-43.6986	0.563014	2673-10uM	DMSO
2673-10uM / DMSO	_GILIDDRPNNEFVIK_	627;626;543	Specific-N	transcript=PF3D7_1015200.1;transcript=PF3D7_1015200.2;transcript=PF3D7_1015200.3	-0.537622	0.537622	7.07982e-21	7.03734e-19	90	transcript=PF3D7_1015200.1;transcript=PF3D7_1015200.2;transcript=PF3D7_1015200.3	NaN	gene=PF3D7_1015200 | organism=Plasmodium_falciparum_3D7 | gene_product=cysteine--tRNA ligase | transcript_product=cysteine--tRNA ligase | location=Pf3D7_10_v3:614872-617736(-) | protein_length=677 | sequence_SO=chromosome | SO=protein_coding | is_pseudo=false;gene=PF3D7_1015200 | organism=Plasmodium_falciparum_3D7 | gene_product=cysteine--tRNA ligase | transcript_product=cysteine--tRNA ligase | l…	NaN	1	-31.1094	0.688906	2673-10uM	DMSO
2673-10uM / DMSO	_FEEEINIDDEIQK_	793	Specific	transcript=PF3D7_1222300.1	-0.512273	0.512273	7.22367e-21	7.14924e-19	54	transcript=PF3D7_1222300.1	NaN	gene=PF3D7_1222300 | organism=Plasmodium_falciparum_3D7 | gene_product=endoplasmin, putative | transcript_product=endoplasmin, putative | location=Pf3D7_12_v3:883567-886032(-) | protein_length=821 | sequence_SO=chromosome | SO=protein_coding | is_pseudo=false	NaN	1	-29.8883	0.701117	2673-10uM	DMSO
2673-1uM / DMSO	_QFLEDSSPLSHPIRPE_	551	Unspecific	transcript=PF3D7_1311800.1	-0.534355	0.534355	7.68379e-21	7.57184e-19	99	transcript=PF3D7_1311800.1	NaN	gene=PF3D7_1311800 | organism=Plasmodium_falciparum_3D7 | gene_product=M1-family alanyl aminopeptidase | transcript_product=M1-family alanyl aminopeptidase | location=Pf3D7_13_v3:501790-505047(+) | protein_length=1085 | sequence_SO=chromosome | SO=protein_coding | is_pseudo=false	NaN	1	-30.9532	0.690468	2673-1uM	DMSO
2673-1uM / DMSO	_GYIGSFEIVDDHR_	45	Specific	transcript=PF3D7_0316800.1	0.393278	0.393278	8.67789e-21	8.51476e-19	99	transcript=PF3D7_0316800.1	NaN	gene=PF3D7_0316800 | organism=Plasmodium_falciparum_3D7 | gene_product=40S ribosomal protein S15A, putative | transcript_product=40S ribosomal protein S15A, putative | location=Pf3D7_03_v3:677842-678474(+) | protein_length=130 | sequence_SO=chromosome | SO=protein_coding | is_pseudo=false	NaN	1	31.3374	1.31337	2673-1uM	DMSO
2673-10uM / DMSO	_IIEEQKPVTEEVVNEEESITH_	3857	Unspecific	transcript=PF3D7_1149000.1	0.697885	0.697885	8.78387e-21	8.58192e-19	54	transcript=PF3D7_1149000.1	NaN	gene=PF3D7_1149000 | organism=Plasmodium_falciparum_3D7 | gene_product=antigen 332, DBL-like protein | transcript_product=antigen 332, DBL-like protein | location=Pf3D7_11_v3:1950210-1968726(+) | protein_length=6093 | sequence_SO=chromosome | SO=protein_coding | is_pseudo=false	NaN	1	62.2125	1.62212	2673-10uM	DMSO
2673-10uM / DMSO	_DDENVLNFLVLEK_	282	Specific	transcript=PF3D7_1454400.1	1.50421	1.50421	9.09611e-21	8.84916e-19	54	transcript=PF3D7_1454400.1	NaN	gene=PF3D7_1454400 | organism=Plasmodium_falciparum_3D7 | gene_product=aminopeptidase P | transcript_product=aminopeptidase P | location=Pf3D7_14_v3:2234143-2236476(+) | protein_length=777 | sequence_SO=chromosome | SO=protein_coding | is_pseudo=false	NaN	1	183.669	2.83669	2673-10uM	DMSO
2673-10uM / DMSO	_TSDVRPELTLAAFK_	231	Specific	transcript=PF3D7_1355100.1	0.618499	0.618499	9.52116e-21	9.22342e-19	72	transcript=PF3D7_1355100.1	NaN	gene=PF3D7_1355100 | organism=Plasmodium_falciparum_3D7 | gene_product=DNA replication licensing factor MCM6 | transcript_product=DNA replication licensing factor MCM6 | location=Pf3D7_13_v3:2187435-2190224(+) | protein_length=929 | sequence_SO=chromosome | SO=protein_coding | is_pseudo=false	NaN	1	53.5277	1.53528	2673-10uM	DMSO
2673-10uM / DMSO	_NVDSEVQEIIDEKDEK_	83	Specific	transcript=PF3D7_1033200.1	-0.954673	0.954673	1.17262e-20	1.13116e-18	81	transcript=PF3D7_1033200.1	NaN	gene=PF3D7_1033200 | organism=Plasmodium_falciparum_3D7 | gene_product=early transcribed membrane protein 10.2 | transcript_product=early transcribed membrane protein 10.2 | location=Pf3D7_10_v3:1335222-1336289(+) | protein_length=355 | sequence_SO=chromosome | SO=protein_coding | is_pseudo=false	NaN	1	-48.4041	0.515959	2673-10uM	DMSO
2673-10uM / DMSO	_GILAC[Carbamidomethyl (C)]LDER_	30	Specific	transcript=PF3D7_1325000.1	0.59459	0.59459	1.24302e-20	1.19403e-18	54	transcript=PF3D7_1325000.1	NaN	gene=PF3D7_1325000 | organism=Plasmodium_falciparum_3D7 | gene_product=U6 snRNA-associated Sm-like protein LSm6, putative | transcript_product=U6 snRNA-associated Sm-like protein LSm6, putative | location=Pf3D7_13_v3:1042855-1043088(-) | protein_length=77 | sequence_SO=chromosome | SO=protein_coding | is_pseudo=false	NaN	1	51.0043	1.51004	2673-10uM	DMSO
2673-1uM / DMSO	_TYFPHFDLSHGS_	42	Specific-C	P69905	-0.363619	0.363619	1.26681e-20	1.21179e-18	108	P69905	HBA1	Hemoglobin subunit alpha	HBA_HUMAN	1	-22.2788	0.777212	2673-1uM	DMSO
2673-10uM / DMSO	_GITFDSGGYNLK_	375	Specific	transcript=PF3D7_1446200.1	0.995416	0.995416	1.29362e-20	1.23229e-18	54	transcript=PF3D7_1446200.1	NaN	gene=PF3D7_1446200 | organism=Plasmodium_falciparum_3D7 | gene_product=M17 leucyl aminopeptidase | transcript_product=M17 leucyl aminopeptidase | location=Pf3D7_14_v3:1893200-1895017(-) | protein_length=605 | sequence_SO=chromosome | SO=protein_coding | is_pseudo=false	NaN	1	99.3656	1.99366	2673-10uM	DMSO
2673-10uM / DMSO	_LGPNYLHIPVNC[Carbamidomethyl (C)]PYR_	366	Specific	P04040	0.401518	0.401518	1.35654e-20	1.28685e-18	108	P04040	CAT	Catalase	CATA_HUMAN	1	32.0897	1.3209	2673-10uM	DMSO
2673-10uM / DMSO	_APVHIIVIPK_	106	Specific-N	transcript=PF3D7_0817500.1	-0.495058	0.495058	1.51564e-20	1.43184e-18	54	transcript=PF3D7_0817500.1	NaN	gene=PF3D7_0817500 | organism=Plasmodium_falciparum_3D7 | gene_product=histidine triad nucleotide-binding protein 1 | transcript_product=histidine triad nucleotide-binding protein 1 | location=Pf3D7_08_v3:798777-800205(+) | protein_length=185 | sequence_SO=chromosome | SO=protein_coding | is_pseudo=false	NaN	1	-29.0467	0.709533	2673-10uM	DMSO
2673-10uM / DMSO	_EEALELFDYNPFK_	431	Specific	transcript=PF3D7_1126000.1	0.550946	0.550946	1.62102e-20	1.52509e-18	54	transcript=PF3D7_1126000.1	NaN	gene=PF3D7_1126000 | organism=Plasmodium_falciparum_3D7 | gene_product=threonine--tRNA ligase | transcript_product=threonine--tRNA ligase | location=Pf3D7_11_v3:1014334-1017375(-) | protein_length=1013 | sequence_SO=chromosome | SO=protein_coding | is_pseudo=false	NaN	1	46.5046	1.46505	2673-10uM	DMSO
2673-10uM / DMSO	_IVNDLEPLDNYR_	512	Specific	transcript=PF3D7_1420700.1	-0.567154	0.567154	1.69323e-20	1.5865e-18	54	transcript=PF3D7_1420700.1	NaN	gene=PF3D7_1420700 | organism=Plasmodium_falciparum_3D7 | gene_product=surface protein P113 | transcript_product=surface protein P113 | location=Pf3D7_14_v3:860011-863080(+) | protein_length=969 | sequence_SO=chromosome | SO=protein_coding | is_pseudo=false	NaN	1	-32.5053	0.674947	2673-10uM	DMSO
2673-10uM / DMSO	_LKPENVEIHFL_	416	Unspecific	transcript=PF3D7_1446200.1	-0.464525	0.464525	1.85602e-20	1.73193e-18	90	transcript=PF3D7_1446200.1	NaN	gene=PF3D7_1446200 | organism=Plasmodium_falciparum_3D7 | gene_product=M17 leucyl aminopeptidase | transcript_product=M17 leucyl aminopeptidase | location=Pf3D7_14_v3:1893200-1895017(-) | protein_length=605 | sequence_SO=chromosome | SO=protein_coding | is_pseudo=false	NaN	1	-27.5291	0.724709	2673-10uM	DMSO
2673-10uM / DMSO	_ASELIEIIGNIK_	149	Specific-N	transcript=PF3D7_0907700.1	-0.622924	0.622924	1.87273e-20	1.74043e-18	81	transcript=PF3D7_0907700.1	NaN	gene=PF3D7_0907700 | organism=Plasmodium_falciparum_3D7 | gene_product=proteasome activator 28 subunit beta, putative | transcript_product=proteasome activator 28 subunit beta, putative | location=Pf3D7_09_v3:364069-364908(-) | protein_length=279 | sequence_SO=chromosome | SO=protein_coding | is_pseudo=false	NaN	1	-35.0646	0.649354	2673-10uM	DMSO
2673-1uM / DMSO	_LVDSVC[Carbamidomethyl (C)]FILGNTFK_	736	Specific	transcript=PF3D7_1367700.1	0.475187	0.475187	1.88856e-20	1.74802e-18	45	transcript=PF3D7_1367700.1	NaN	gene=PF3D7_1367700 | organism=Plasmodium_falciparum_3D7 | gene_product=alanine--tRNA ligase | transcript_product=alanine--tRNA ligase | location=Pf3D7_13_v3:2695655-2699881(+) | protein_length=1408 | sequence_SO=chromosome | SO=protein_coding | is_pseudo=false	NaN	1	39.0098	1.3901	2673-1uM	DMSO
2673-1uM / DMSO	_SGELADAQYLHELLTR_	55	Specific-N	transcript=PF3D7_0803800.1	0.68337	0.68337	1.93543e-20	1.77702e-18	54	transcript=PF3D7_0803800.1	NaN	gene=PF3D7_0803800 | organism=Plasmodium_falciparum_3D7 | gene_product=proteasome subunit beta type-4 | transcript_product=proteasome subunit beta type-4 | location=Pf3D7_08_v3:233467-234426(-) | protein_length=265 | sequence_SO=chromosome | SO=protein_coding | is_pseudo=false	NaN	1	60.5886	1.60589	2673-1uM	DMSO
2673-10uM / DMSO	_ILVEFSDK_	371;295	Specific	transcript=PF3D7_0923800.1;transcript=PF3D7_0923800.2	0.636378	0.636378	1.9311e-20	1.77702e-18	45	transcript=PF3D7_0923800.1;transcript=PF3D7_0923800.2	NaN	gene=PF3D7_0923800 | organism=Plasmodium_falciparum_3D7 | gene_product=thioredoxin reductase | transcript_product=thioredoxin reductase | location=Pf3D7_09_v3:961933-963786(-) | protein_length=617 | sequence_SO=chromosome | SO=protein_coding | is_pseudo=false;gene=PF3D7_0923800 | organism=Plasmodium_falciparum_3D7 | gene_product=thioredoxin reductase | transcript_product=thioredoxin reductase | l…	NaN	1	55.4421	1.55442	2673-10uM	DMSO
2673-1uM / DMSO	_AHAGEYGAEALER_	20	Specific-N	P69905	0.405084	0.405084	1.96925e-20	1.80084e-18	108	P69905	HBA1	Hemoglobin subunit alpha	HBA_HUMAN	1	32.4166	1.32417	2673-1uM	DMSO
2673-1uM / DMSO	_DAQIFIQK_	469	Specific	P04040	1.27899	1.27899	2.08038e-20	1.88568e-18	45	P04040	CAT	Catalase	CATA_HUMAN	1	142.668	2.42668	2673-1uM	DMSO
2673-10uM / DMSO	_SFFQQFIK_	847	Specific	transcript=PF3D7_0108300.1	-0.582785	0.582785	2.08676e-20	1.88568e-18	54	transcript=PF3D7_0108300.1	NaN	gene=PF3D7_0108300 | organism=Plasmodium_falciparum_3D7 | gene_product=conserved Plasmodium protein, unknown function | transcript_product=conserved Plasmodium protein, unknown function | location=Pf3D7_01_v3:337168-343833(+) | protein_length=2221 | sequence_SO=chromosome | SO=protein_coding | is_pseudo=false	NaN	1	-33.2326	0.667674	2673-10uM	DMSO
2673-1uM / DMSO	_RLPVVNFAAGGVATPADAA_	206	Specific-C	transcript=PF3D7_0621200.1	1.1517	1.1517	2.08514e-20	1.88568e-18	54	transcript=PF3D7_0621200.1	NaN	gene=PF3D7_0621200 | organism=Plasmodium_falciparum_3D7 | gene_product=pyridoxine biosynthesis protein PDX1 | transcript_product=pyridoxine biosynthesis protein PDX1 | location=Pf3D7_06_v3:871297-872202(-) | protein_length=301 | sequence_SO=chromosome | SO=protein_coding | is_pseudo=false	NaN	1	122.176	2.22176	2673-1uM	DMSO
2673-1uM / DMSO	_GITFDSGGYNLK_	375	Specific	transcript=PF3D7_1446200.1	0.685751	0.685751	2.2563e-20	2.03085e-18	54	transcript=PF3D7_1446200.1	NaN	gene=PF3D7_1446200 | organism=Plasmodium_falciparum_3D7 | gene_product=M17 leucyl aminopeptidase | transcript_product=M17 leucyl aminopeptidase | location=Pf3D7_14_v3:1893200-1895017(-) | protein_length=605 | sequence_SO=chromosome | SO=protein_coding | is_pseudo=false	NaN	1	60.8539	1.60854	2673-1uM	DMSO
2673-1uM / DMSO	_AASTILSNILYQYK_	138	Specific	transcript=PF3D7_1011400.1	0.770878	0.770878	2.50645e-20	2.24716e-18	54	transcript=PF3D7_1011400.1	NaN	gene=PF3D7_1011400 | organism=Plasmodium_falciparum_3D7 | gene_product=proteasome subunit beta type-5 | transcript_product=proteasome subunit beta type-5 | location=Pf3D7_10_v3:441140-441955(-) | protein_length=271 | sequence_SO=chromosome | SO=protein_coding | is_pseudo=false	NaN	1	70.6308	1.70631	2673-1uM	DMSO
2673-10uM / DMSO	_YSESDVDGVFGL_	238	Unspecific	transcript=PF3D7_1408100.1	-0.847998	0.847998	2.61746e-20	2.33752e-18	36	transcript=PF3D7_1408100.1	NaN	gene=PF3D7_1408100 | organism=Plasmodium_falciparum_3D7 | gene_product=plasmepsin III | transcript_product=plasmepsin III | location=Pf3D7_14_v3:297468-298823(+) | protein_length=451 | sequence_SO=chromosome | SO=protein_coding | is_pseudo=false	NaN	1	-44.4445	0.555555	2673-10uM	DMSO
2673-10uM / DMSO	_SIEPMIIMSK_	168	Specific	transcript=PF3D7_0925900.1	0.702997	0.702997	2.82601e-20	2.51248e-18	54	transcript=PF3D7_0925900.1	NaN	gene=PF3D7_0925900 | organism=Plasmodium_falciparum_3D7 | gene_product=parasitophorous vacuolar protein 5, putative | transcript_product=parasitophorous vacuolar protein 5, putative | location=Pf3D7_09_v3:1040713-1041516(+) | protein_length=217 | sequence_SO=chromosome | SO=protein_coding | is_pseudo=false	NaN	1	62.7883	1.62788	2673-10uM	DMSO
2673-10uM / DMSO	_TTIIGIIYDN_	31	Unspecific	transcript=PF3D7_0931800.1	-1.24475	1.24475	2.83536e-20	2.51248e-18	36	transcript=PF3D7_0931800.1	NaN	gene=PF3D7_0931800 | organism=Plasmodium_falciparum_3D7 | gene_product=proteasome subunit beta type-6, putative | transcript_product=proteasome subunit beta type-6, putative | location=Pf3D7_09_v3:1273082-1273930(-) | protein_length=282 | sequence_SO=chromosome | SO=protein_coding | is_pseudo=false	NaN	1	-57.8018	0.421982	2673-10uM	DMSO
2673-10uM / DMSO	_SPSDVKPLPSPDTDVPLS_	119;121;89;108;76;121;56	Specific-C	A0A087WU29;A0A0C4DFT7;E7EQF3;E9PD10;E9PH25;P02724;Q13030	0.833378	0.833378	2.99548e-20	2.64412e-18	54	A0A087WU29;A0A0C4DFT7;E7EQF3;E9PD10;E9PH25;P02724;Q13030	GYPA;GYPA;GYPA;GYPA;GYPA;GYPA;GPErik	Glycophorin;Glycophorin;Glycophorin;Glycophorin;Glycophorin-A;Glycophorin-A;Glycophorin Erik I-IV	A0A087WU29_HUMAN;A0A0C4DFT7_HUMAN;E7EQF3_HUMAN;E9PD10_HUMAN;E9PH25_HUMAN;GLPA_HUMAN;Q13030_HUMAN	1	78.1853	1.78185	2673-10uM	DMSO
2673-10uM / DMSO	_SLTNSFNNLDFDPSK_	22	Specific	transcript=PF3D7_1439900.1	0.739934	0.739934	3.03234e-20	2.66636e-18	54	transcript=PF3D7_1439900.1	NaN	gene=PF3D7_1439900 | organism=Plasmodium_falciparum_3D7 | gene_product=triosephosphate isomerase | transcript_product=triosephosphate isomerase | location=Pf3D7_14_v3:1622576-1623612(+) | protein_length=248 | sequence_SO=chromosome | SO=protein_coding | is_pseudo=false	NaN	1	67.0099	1.6701	2673-10uM	DMSO
2673-10uM / DMSO	_INYENHIKPIISTTLFNQLNK_	173	Specific	transcript=PF3D7_0932300.1	0.997672	0.997672	3.16204e-20	2.76976e-18	72	transcript=PF3D7_0932300.1	NaN	gene=PF3D7_0932300 | organism=Plasmodium_falciparum_3D7 | gene_product=M18 aspartyl aminopeptidase | transcript_product=M18 aspartyl aminopeptidase | location=Pf3D7_09_v3:1289315-1291027(-) | protein_length=570 | sequence_SO=chromosome | SO=protein_coding | is_pseudo=false	NaN	1	99.6775	1.99677	2673-10uM	DMSO
2673-10uM / DMSO	_WYPYIDNGGTVIGLTGK_	30	Specific	transcript=PF3D7_0518300.1	0.726762	0.726762	3.5345e-20	3.08419e-18	45	transcript=PF3D7_0518300.1	NaN	gene=PF3D7_0518300 | organism=Plasmodium_falciparum_3D7 | gene_product=proteasome subunit beta type-1, putative | transcript_product=proteasome subunit beta type-1, putative | location=Pf3D7_05_v3:759831-760998(-) | protein_length=240 | sequence_SO=chromosome | SO=protein_coding | is_pseudo=false	NaN	1	65.4921	1.65492	2673-10uM	DMSO
2673-10uM / DMSO	_LPALLWNK_	76	Specific	transcript=PF3D7_0935900.1	-0.58437	0.58437	3.64095e-20	3.165e-18	63	transcript=PF3D7_0935900.1	NaN	gene=PF3D7_0935900 | organism=Plasmodium_falciparum_3D7 | gene_product=ring-exported protein 1 | transcript_product=ring-exported protein 1 | location=Pf3D7_09_v3:1420483-1422807(-) | protein_length=713 | sequence_SO=chromosome | SO=protein_coding | is_pseudo=false	NaN	1	-33.306	0.66694	2673-10uM	DMSO
2673-1uM / DMSO	_IAVKPIPSLFR_	724	Specific-N	transcript=PF3D7_1311800.1	-0.461744	0.461744	3.73031e-20	3.2304e-18	81	transcript=PF3D7_1311800.1	NaN	gene=PF3D7_1311800 | organism=Plasmodium_falciparum_3D7 | gene_product=M1-family alanyl aminopeptidase | transcript_product=M1-family alanyl aminopeptidase | location=Pf3D7_13_v3:501790-505047(+) | protein_length=1085 | sequence_SO=chromosome | SO=protein_coding | is_pseudo=false	NaN	1	-27.3892	0.726108	2673-1uM	DMSO
2673-10uM / DMSO	_DILLEVC[Carbamidomethyl (C)]PISNVLLN_	275	Specific-C	transcript=PF3D7_1029600.1	-0.77474	0.77474	4.34219e-20	3.74608e-18	54	transcript=PF3D7_1029600.1	NaN	gene=PF3D7_1029600 | organism=Plasmodium_falciparum_3D7 | gene_product=adenosine deaminase | transcript_product=adenosine deaminase | location=Pf3D7_10_v3:1206302-1207405(+) | protein_length=367 | sequence_SO=chromosome | SO=protein_coding | is_pseudo=false	NaN	1	-41.5506	0.584494	2673-10uM	DMSO
2673-1uM / DMSO	_MYLTILGEEYYK_	589	Specific	transcript=PF3D7_1311800.1	1.15781	1.15781	4.37602e-20	3.76108e-18	36	transcript=PF3D7_1311800.1	NaN	gene=PF3D7_1311800 | organism=Plasmodium_falciparum_3D7 | gene_product=M1-family alanyl aminopeptidase | transcript_product=M1-family alanyl aminopeptidase | location=Pf3D7_13_v3:501790-505047(+) | protein_length=1085 | sequence_SO=chromosome | SO=protein_coding | is_pseudo=false	NaN	1	123.118	2.23118	2673-1uM	DMSO
2673-1uM / DMSO	_AVLPMLNYELSDEIK_	719	Specific-N	transcript=PF3D7_0524000.1	0.523394	0.523394	4.71857e-20	4.0403e-18	45	transcript=PF3D7_0524000.1	NaN	gene=PF3D7_0524000 | organism=Plasmodium_falciparum_3D7 | gene_product=karyopherin beta | transcript_product=karyopherin beta | location=Pf3D7_05_v3:998753-1002124(+) | protein_length=1123 | sequence_SO=chromosome | SO=protein_coding | is_pseudo=false	NaN	1	43.7333	1.43733	2673-1uM	DMSO
2673-10uM / DMSO	_LVQIEYALNR_	19	Specific	transcript=PF3D7_0608500.1	0.576089	0.576089	5.36205e-20	4.57414e-18	54	transcript=PF3D7_0608500.1	NaN	gene=PF3D7_0608500 | organism=Plasmodium_falciparum_3D7 | gene_product=proteasome subunit alpha type-2, putative | transcript_product=proteasome subunit alpha type-2, putative | location=Pf3D7_06_v3:351780-352775(-) | protein_length=235 | sequence_SO=chromosome | SO=protein_coding | is_pseudo=false	NaN	1	49.0802	1.4908	2673-10uM	DMSO
2673-1uM / DMSO	_GTFSQLSELHC[Carbamidomethyl (C)]DK_	84	Specific	P02042	0.968711	0.968711	5.69232e-20	4.81417e-18	72	P02042	HBD	Hemoglobin subunit delta	HBD_HUMAN	1	95.7092	1.95709	2673-1uM	DMSO
2673-10uM / DMSO	_YHFGENSVDSLIEK_	51	Specific	transcript=PF3D7_0919700.1	0.390552	0.390552	5.70658e-20	4.81417e-18	90	transcript=PF3D7_0919700.1	NaN	gene=PF3D7_0919700 | organism=Plasmodium_falciparum_3D7 | gene_product=pyridoxal phosphate homeostasis protein, putative | transcript_product=pyridoxal phosphate homeostasis protein, putative | location=Pf3D7_09_v3:803029-803757(+) | protein_length=242 | sequence_SO=chromosome | SO=protein_coding | is_pseudo=false	NaN	1	31.0895	1.31089	2673-10uM	DMSO
2673-10uM / DMSO	_NNIAVKPIPSLFR_	722	Specific-N	transcript=PF3D7_1311800.1	-0.378932	0.378932	5.68909e-20	4.81417e-18	108	transcript=PF3D7_1311800.1	NaN	gene=PF3D7_1311800 | organism=Plasmodium_falciparum_3D7 | gene_product=M1-family alanyl aminopeptidase | transcript_product=M1-family alanyl aminopeptidase | location=Pf3D7_13_v3:501790-505047(+) | protein_length=1085 | sequence_SO=chromosome | SO=protein_coding | is_pseudo=false	NaN	1	-23.0993	0.769007	2673-10uM	DMSO
2673-10uM / DMSO	_GTDNHLIVVDLR_	322	Specific-N	transcript=PF3D7_1235600.1	-0.636065	0.636065	5.86451e-20	4.9292e-18	90	transcript=PF3D7_1235600.1	NaN	gene=PF3D7_1235600 | organism=Plasmodium_falciparum_3D7 | gene_product=serine hydroxymethyltransferase | transcript_product=serine hydroxymethyltransferase | location=Pf3D7_12_v3:1484306-1485911(+) | protein_length=442 | sequence_SO=chromosome | SO=protein_coding | is_pseudo=false	NaN	1	-35.6534	0.643466	2673-10uM	DMSO
2673-10uM / DMSO	_VEPTDVVNIEVPK_	106	Specific-N	transcript=PF3D7_0815600.1	0.602998	0.602998	6.5025e-20	5.44542e-18	54	transcript=PF3D7_0815600.1	NaN	gene=PF3D7_0815600 | organism=Plasmodium_falciparum_3D7 | gene_product=eukaryotic translation initiation factor 3 subunit G, putative | transcript_product=eukaryotic translation initiation factor 3 subunit G, putative | location=Pf3D7_08_v3:729917-732187(-) | protein_length=268 | sequence_SO=chromosome | SO=protein_coding | is_pseudo=false	NaN	1	51.887	1.51887	2673-10uM	DMSO
2673-1uM / DMSO	_VENINPLSDIVHPELR_	1096	Specific	transcript=PF3D7_1211900.1	0.221342	0.221342	6.53538e-20	5.45298e-18	108	transcript=PF3D7_1211900.1	NaN	gene=PF3D7_1211900 | organism=Plasmodium_falciparum_3D7 | gene_product=non-SERCA-type Ca2+ -transporting P-ATPase | transcript_product=non-SERCA-type Ca2+ -transporting P-ATPase | location=Pf3D7_12_v3:529005-532799(-) | protein_length=1264 | sequence_SO=chromosome | SO=protein_coding | is_pseudo=false	NaN	1	16.5818	1.16582	2673-1uM	DMSO
2673-10uM / DMSO	_QNEHDVLTSVLNYLK_	180	Specific	transcript=PF3D7_0722400.1	-1.68711	1.68711	7.41945e-20	6.16538e-18	90	transcript=PF3D7_0722400.1	NaN	gene=PF3D7_0722400 | organism=Plasmodium_falciparum_3D7 | gene_product=Obg-like ATPase 1, putative | transcript_product=Obg-like ATPase 1, putative | location=Pf3D7_07_v3:954784-956343(+) | protein_length=393 | sequence_SO=chromosome | SO=protein_coding | is_pseudo=false	NaN	1	-68.9451	0.310549	2673-10uM	DMSO
2673-1uM / DMSO	_LQPAEIETC[Carbamidomethyl (C)]MK_	575	Specific	transcript=PF3D7_0818900.1	0.720815	0.720815	7.44312e-20	6.16538e-18	54	transcript=PF3D7_0818900.1	NaN	gene=PF3D7_0818900 | organism=Plasmodium_falciparum_3D7 | gene_product=heat shock protein 70 | transcript_product=heat shock protein 70 | location=Pf3D7_08_v3:860384-862417(+) | protein_length=677 | sequence_SO=chromosome | SO=protein_coding | is_pseudo=false	NaN	1	64.8113	1.64811	2673-1uM	DMSO
2673-1uM / DMSO	_YNIQPNMSDEEIIDYYLFSKPGK_	65	Specific	transcript=PF3D7_1029600.1	0.808297	0.808297	7.48772e-20	6.17993e-18	45	transcript=PF3D7_1029600.1	NaN	gene=PF3D7_1029600 | organism=Plasmodium_falciparum_3D7 | gene_product=adenosine deaminase | transcript_product=adenosine deaminase | location=Pf3D7_10_v3:1206302-1207405(+) | protein_length=367 | sequence_SO=chromosome | SO=protein_coding | is_pseudo=false	NaN	1	75.1143	1.75114	2673-1uM	DMSO
2673-1uM / DMSO	_HNVGEDLVFDGVGLK_	238	Specific	transcript=PF3D7_1311800.1	0.872857	0.872857	7.60596e-20	6.25495e-18	108	transcript=PF3D7_1311800.1	NaN	gene=PF3D7_1311800 | organism=Plasmodium_falciparum_3D7 | gene_product=M1-family alanyl aminopeptidase | transcript_product=M1-family alanyl aminopeptidase | location=Pf3D7_13_v3:501790-505047(+) | protein_length=1085 | sequence_SO=chromosome | SO=protein_coding | is_pseudo=false	NaN	1	83.1286	1.83129	2673-1uM	DMSO
2673-10uM / DMSO	_LELGESLLQR_	1963	Specific-N	P11277	0.472856	0.472856	8.71775e-20	7.14355e-18	54	P11277	SPTB	Spectrin beta chain, erythrocytic	SPTB1_HUMAN	1	38.7854	1.38785	2673-10uM	DMSO
2673-10uM / DMSO	_EDQLEYLEEK_	179	Specific	transcript=PF3D7_0708400.1	-0.616101	0.616101	9.12972e-20	7.45442e-18	54	transcript=PF3D7_0708400.1	NaN	gene=PF3D7_0708400 | organism=Plasmodium_falciparum_3D7 | gene_product=heat shock protein 90 | transcript_product=heat shock protein 90 | location=Pf3D7_07_v3:381592-384614(+) | protein_length=745 | sequence_SO=chromosome | SO=protein_coding | is_pseudo=false	NaN	1	-34.7568	0.652432	2673-10uM	DMSO
2673-10uM / DMSO	_VNVDAVGGEALGR_	19	Specific	P02042	0.88696	0.88696	9.21203e-20	7.47614e-18	45	P02042	HBD	Hemoglobin subunit delta	HBD_HUMAN	1	84.9275	1.84928	2673-10uM	DMSO
2673-1uM / DMSO	_VADALTNAVAHVDDMPNAL_	63	Specific-C	P69905	2.37234	2.37234	9.23368e-20	7.47614e-18	45	P69905	HBA1	Hemoglobin subunit alpha	HBA_HUMAN	1	417.781	5.17781	2673-1uM	DMSO
2673-10uM / DMSO	_SHPHDFTPVC[Carbamidomethyl (C)]TTELAEFGK_	38	Specific-N	transcript=PF3D7_0802200.1	0.47214	0.47214	9.25443e-20	7.47614e-18	54	transcript=PF3D7_0802200.1	NaN	gene=PF3D7_0802200 | organism=Plasmodium_falciparum_3D7 | gene_product=1-cys peroxiredoxin | transcript_product=1-cys peroxiredoxin | location=Pf3D7_08_v3:165416-166078(+) | protein_length=220 | sequence_SO=chromosome | SO=protein_coding | is_pseudo=false	NaN	1	38.7166	1.38717	2673-10uM	DMSO
2673-10uM / DMSO	_VIMITGDQKPTAVAIGK_	771	Specific	transcript=PF3D7_1211900.1	0.626926	0.626926	9.47464e-20	7.62709e-18	81	transcript=PF3D7_1211900.1	NaN	gene=PF3D7_1211900 | organism=Plasmodium_falciparum_3D7 | gene_product=non-SERCA-type Ca2+ -transporting P-ATPase | transcript_product=non-SERCA-type Ca2+ -transporting P-ATPase | location=Pf3D7_12_v3:529005-532799(-) | protein_length=1264 | sequence_SO=chromosome | SO=protein_coding | is_pseudo=false	NaN	1	54.4272	1.54427	2673-10uM	DMSO
2673-1uM / DMSO	_LYIGLAGLATDVQTVAQR_	49	Specific	P49720	3.11997	3.11997	1.00192e-19	8.03718e-18	63	P49720	PSMB3	Proteasome subunit beta type-3	PSB3_HUMAN	1	769.367	8.69367	2673-1uM	DMSO
2673-10uM / DMSO	_MGAYLSVGK_	338	Specific	transcript=PF3D7_1446200.1	1.49837	1.49837	1.07007e-19	8.55381e-18	45	transcript=PF3D7_1446200.1	NaN	gene=PF3D7_1446200 | organism=Plasmodium_falciparum_3D7 | gene_product=M17 leucyl aminopeptidase | transcript_product=M17 leucyl aminopeptidase | location=Pf3D7_14_v3:1893200-1895017(-) | protein_length=605 | sequence_SO=chromosome | SO=protein_coding | is_pseudo=false	NaN	1	182.523	2.82523	2673-10uM	DMSO
2673-1uM / DMSO	_LLVVYPWTQ_	32	Specific-C	P02042	-0.787325	0.787325	1.13634e-19	9.02045e-18	54	P02042	HBD	Hemoglobin subunit delta	HBD_HUMAN	1	-42.0583	0.579417	2673-1uM	DMSO
2673-1uM / DMSO	_YYLNMDEPAPVDYIAK_	94	Specific	transcript=PF3D7_1353900.1	0.800744	0.800744	1.13564e-19	9.02045e-18	54	transcript=PF3D7_1353900.1	NaN	gene=PF3D7_1353900 | organism=Plasmodium_falciparum_3D7 | gene_product=proteasome subunit alpha type-7, putative | transcript_product=proteasome subunit alpha type-7, putative | location=Pf3D7_13_v3:2154162-2155217(+) | protein_length=241 | sequence_SO=chromosome | SO=protein_coding | is_pseudo=false	NaN	1	74.1999	1.742	2673-1uM	DMSO
2673-10uM / DMSO	_SLQLTNTHPVATPV_	163	Specific-C	transcript=PF3D7_0802200.1	0.813934	0.813934	1.17111e-19	9.26433e-18	54	transcript=PF3D7_0802200.1	NaN	gene=PF3D7_0802200 | organism=Plasmodium_falciparum_3D7 | gene_product=1-cys peroxiredoxin | transcript_product=1-cys peroxiredoxin | location=Pf3D7_08_v3:165416-166078(+) | protein_length=220 | sequence_SO=chromosome | SO=protein_coding | is_pseudo=false	NaN	1	75.7998	1.758	2673-10uM	DMSO
2673-10uM / DMSO	_EIIVEEVKEEIEKQ_	804	Unspecific	transcript=PF3D7_0500800.1	-1.86722	1.86722	1.19441e-19	9.4161e-18	72	transcript=PF3D7_0500800.1	NaN	gene=PF3D7_0500800 | organism=Plasmodium_falciparum_3D7 | gene_product=mature parasite-infected erythrocyte surface antigen | transcript_product=mature parasite-infected erythrocyte surface antigen | location=Pf3D7_05_v3:43327-47761(-) | protein_length=1434 | sequence_SO=chromosome | SO=protein_coding | is_pseudo=false	NaN	1	-72.5899	0.274101	2673-10uM	DMSO
2673-10uM / DMSO	_GNHDFPC[Carbamidomethyl (C)]NPAPPVPIK_	71	Specific-N	transcript=PF3D7_1359400.1	0.872429	0.872429	1.2404e-19	9.745e-18	63	transcript=PF3D7_1359400.1	NaN	gene=PF3D7_1359400 | organism=Plasmodium_falciparum_3D7 | gene_product=CUGBP Elav-like family member 1 | transcript_product=CUGBP Elav-like family member 1 | location=Pf3D7_13_v3:2359251-2361198(-) | protein_length=509 | sequence_SO=chromosome | SO=protein_coding | is_pseudo=false	NaN	1	83.0743	1.83074	2673-10uM	DMSO
2673-10uM / DMSO	_IC[Carbamidomethyl (C)]DQISDAILDSC[Carbamidomethyl (C)]_	26	Specific-C	transcript=PF3D7_0922200.1	-0.544965	0.544965	1.26284e-19	9.88734e-18	54	transcript=PF3D7_0922200.1	NaN	gene=PF3D7_0922200 | organism=Plasmodium_falciparum_3D7 | gene_product=S-adenosylmethionine synthetase | transcript_product=S-adenosylmethionine synthetase | location=Pf3D7_09_v3:903362-904570(+) | protein_length=402 | sequence_SO=chromosome | SO=protein_coding | is_pseudo=false	NaN	1	-31.4592	0.685408	2673-10uM	DMSO
2673-1uM / DMSO	_INEISINNK_	253	Specific	transcript=PF3D7_1311800.1	1.28926	1.28926	1.43582e-19	1.12033e-17	45	transcript=PF3D7_1311800.1	NaN	gene=PF3D7_1311800 | organism=Plasmodium_falciparum_3D7 | gene_product=M1-family alanyl aminopeptidase | transcript_product=M1-family alanyl aminopeptidase | location=Pf3D7_13_v3:501790-505047(+) | protein_length=1085 | sequence_SO=chromosome | SO=protein_coding | is_pseudo=false	NaN	1	144.402	2.44402	2673-1uM	DMSO
2673-10uM / DMSO	_YFFTVIDAPGHK_	85;85	Specific	transcript=PF3D7_1357000.1;transcript=PF3D7_1357100.1	0.539664	0.539664	1.45234e-19	1.12936e-17	99	transcript=PF3D7_1357000.1;transcript=PF3D7_1357100.1	NaN	gene=PF3D7_1357000 | organism=Plasmodium_falciparum_3D7 | gene_product=elongation factor 1-alpha | transcript_product=elongation factor 1-alpha | location=Pf3D7_13_v3:2265817-2267148(-) | protein_length=443 | sequence_SO=chromosome | SO=protein_coding | is_pseudo=false;gene=PF3D7_1357100 | organism=Plasmodium_falciparum_3D7 | gene_product=elongation factor 1-alpha | transcript_product=elongation …	NaN	1	45.3634	1.45363	2673-10uM	DMSO
2673-10uM / DMSO	_LITTLC[Carbamidomethyl (C)]AEK_	71	Specific	transcript=PF3D7_0307100.1	1.07964	1.07964	1.46374e-19	1.13438e-17	45	transcript=PF3D7_0307100.1	NaN	gene=PF3D7_0307100 | organism=Plasmodium_falciparum_3D7 | gene_product=40S ribosomal protein S12, putative | transcript_product=40S ribosomal protein S12, putative | location=Pf3D7_03_v3:312693-313342(-) | protein_length=141 | sequence_SO=chromosome | SO=protein_coding | is_pseudo=false	NaN	1	111.351	2.11351	2673-10uM	DMSO
2673-10uM / DMSO	_IILISHC[Carbamidomethyl (C)]GRPDGLR_	58	Specific	transcript=PF3D7_0922500.1	0.470876	0.470876	1.48321e-19	1.14558e-17	126	transcript=PF3D7_0922500.1	NaN	gene=PF3D7_0922500 | organism=Plasmodium_falciparum_3D7 | gene_product=phosphoglycerate kinase | transcript_product=phosphoglycerate kinase | location=Pf3D7_09_v3:913230-914480(+) | protein_length=416 | sequence_SO=chromosome | SO=protein_coding | is_pseudo=false	NaN	1	38.595	1.38595	2673-10uM	DMSO
2673-10uM / DMSO	_RLPVVNFAAGGVATPADAA_	206	Specific-C	transcript=PF3D7_0621200.1	1.29313	1.29313	1.6026e-19	1.23363e-17	54	transcript=PF3D7_0621200.1	NaN	gene=PF3D7_0621200 | organism=Plasmodium_falciparum_3D7 | gene_product=pyridoxine biosynthesis protein PDX1 | transcript_product=pyridoxine biosynthesis protein PDX1 | location=Pf3D7_06_v3:871297-872202(-) | protein_length=301 | sequence_SO=chromosome | SO=protein_coding | is_pseudo=false	NaN	1	145.06	2.4506	2673-10uM	DMSO
2673-1uM / DMSO	_NINAC[Carbamidomethyl (C)]QIIVDIVK_	28	Specific	transcript=PF3D7_0308200.1	0.606424	0.606424	1.79021e-19	1.37341e-17	54	transcript=PF3D7_0308200.1	NaN	gene=PF3D7_0308200 | organism=Plasmodium_falciparum_3D7 | gene_product=T-complex protein 1 subunit eta | transcript_product=T-complex protein 1 subunit eta | location=Pf3D7_03_v3:362342-364233(-) | protein_length=539 | sequence_SO=chromosome | SO=protein_coding | is_pseudo=false	NaN	1	52.2481	1.52248	2673-1uM	DMSO
2673-10uM / DMSO	_NANEALDLLVT_	227	Unspecific	transcript=PF3D7_1015900.1	-0.65142	0.65142	1.92194e-19	1.46955e-17	54	transcript=PF3D7_1015900.1	NaN	gene=PF3D7_1015900 | organism=Plasmodium_falciparum_3D7 | gene_product=enolase | transcript_product=enolase | location=Pf3D7_10_v3:637138-639011(+) | protein_length=446 | sequence_SO=chromosome | SO=protein_coding | is_pseudo=false	NaN	1	-36.3347	0.636653	2673-10uM	DMSO
2673-10uM / DMSO	_ETSPGSC[Carbamidomethyl (C)]FWLPHGSK_	546	Specific	transcript=PF3D7_1126000.1	0.490309	0.490309	2.00484e-19	1.52782e-17	81	transcript=PF3D7_1126000.1	NaN	gene=PF3D7_1126000 | organism=Plasmodium_falciparum_3D7 | gene_product=threonine--tRNA ligase | transcript_product=threonine--tRNA ligase | location=Pf3D7_11_v3:1014334-1017375(-) | protein_length=1013 | sequence_SO=chromosome | SO=protein_coding | is_pseudo=false	NaN	1	40.4746	1.40475	2673-10uM	DMSO
2673-10uM / DMSO	_HASIVDIF_	122	Specific-C	transcript=PF3D7_1442300.1	-0.586804	0.586804	2.1701e-19	1.64827e-17	81	transcript=PF3D7_1442300.1	NaN	gene=PF3D7_1442300 | organism=Plasmodium_falciparum_3D7 | gene_product=tRNA import protein tRIP | transcript_product=tRNA import protein tRIP | location=Pf3D7_14_v3:1712626-1714065(-) | protein_length=402 | sequence_SO=chromosome | SO=protein_coding | is_pseudo=false	NaN	1	-33.4184	0.665816	2673-10uM	DMSO
2673-1uM / DMSO	_EASMVITESPAALQLR_	236	Specific	P27105	1.54172	1.54172	2.21422e-19	1.67621e-17	81	P27105	STOM	Erythrocyte band 7 integral membrane protein	STOM_HUMAN	1	191.142	2.91142	2673-1uM	DMSO
2673-10uM / DMSO	_LLINNLVAGSVIGK_	23	Specific	transcript=PF3D7_1415300.1	-0.390281	0.390281	2.22877e-19	1.68165e-17	54	transcript=PF3D7_1415300.1	NaN	gene=PF3D7_1415300 | organism=Plasmodium_falciparum_3D7 | gene_product=RNA-binding protein Nova-1, putative | transcript_product=RNA-binding protein Nova-1, putative | location=Pf3D7_14_v3:615167-616180(+) | protein_length=337 | sequence_SO=chromosome | SO=protein_coding | is_pseudo=false	NaN	1	-23.7019	0.762981	2673-10uM	DMSO
2673-10uM / DMSO	_IIDSIDSFVK_	1440	Specific	transcript=PF3D7_1219100.1	-1.16686	1.16686	2.39707e-19	1.80269e-17	54	transcript=PF3D7_1219100.1	NaN	gene=PF3D7_1219100 | organism=Plasmodium_falciparum_3D7 | gene_product=clathrin heavy chain, putative | transcript_product=clathrin heavy chain, putative | location=Pf3D7_12_v3:757649-763642(+) | protein_length=1997 | sequence_SO=chromosome | SO=protein_coding | is_pseudo=false	NaN	1	-55.4612	0.445388	2673-10uM	DMSO
2673-1uM / DMSO	_SGGHYPISAIL_	265	Unspecific	transcript=PF3D7_0608800.1	-0.495181	0.495181	2.46728e-19	1.84941e-17	54	transcript=PF3D7_0608800.1	NaN	gene=PF3D7_0608800 | organism=Plasmodium_falciparum_3D7 | gene_product=ornithine aminotransferase | transcript_product=ornithine aminotransferase | location=Pf3D7_06_v3:362635-363879(+) | protein_length=414 | sequence_SO=chromosome | SO=protein_coding | is_pseudo=false	NaN	1	-29.0527	0.709473	2673-1uM	DMSO
2673-1uM / DMSO	_VDDMPNALSAL_	74	Unspecific	P69905	0.778563	0.778563	2.51119e-19	1.87617e-17	54	P69905	HBA1	Hemoglobin subunit alpha	HBA_HUMAN	1	71.5421	1.71542	2673-1uM	DMSO
2673-10uM / DMSO	_IDAVLDVVR_	113	Specific-N	transcript=PF3D7_1008700.1	0.793129	0.793129	2.64536e-19	1.96997e-17	45	transcript=PF3D7_1008700.1	NaN	gene=PF3D7_1008700 | organism=Plasmodium_falciparum_3D7 | gene_product=tubulin beta chain | transcript_product=tubulin beta chain | location=Pf3D7_10_v3:360625-362480(-) | protein_length=445 | sequence_SO=chromosome | SO=protein_coding | is_pseudo=false	NaN	1	73.2829	1.73283	2673-10uM	DMSO
2673-10uM / DMSO	_YSESDVDGVFGLGWK_	238	Specific-N	transcript=PF3D7_1408100.1	0.664146	0.664146	2.89957e-19	2.15227e-17	54	transcript=PF3D7_1408100.1	NaN	gene=PF3D7_1408100 | organism=Plasmodium_falciparum_3D7 | gene_product=plasmepsin III | transcript_product=plasmepsin III | location=Pf3D7_14_v3:297468-298823(+) | protein_length=451 | sequence_SO=chromosome | SO=protein_coding | is_pseudo=false	NaN	1	58.463	1.58463	2673-10uM	DMSO
2673-1uM / DMSO	_DILLEVC[Carbamidomethyl (C)]PISNVLLN_	275	Specific-C	transcript=PF3D7_1029600.1	-0.831092	0.831092	2.92358e-19	2.16128e-17	54	transcript=PF3D7_1029600.1	NaN	gene=PF3D7_1029600 | organism=Plasmodium_falciparum_3D7 | gene_product=adenosine deaminase | transcript_product=adenosine deaminase | location=Pf3D7_10_v3:1206302-1207405(+) | protein_length=367 | sequence_SO=chromosome | SO=protein_coding | is_pseudo=false	NaN	1	-43.7896	0.562104	2673-1uM	DMSO
2673-1uM / DMSO	_AHQVVEDGYEFFAK_	245	Specific	transcript=PF3D7_1414400.1	1.28023	1.28023	2.93062e-19	2.16128e-17	72	transcript=PF3D7_1414400.1	NaN	gene=PF3D7_1414400 | organism=Plasmodium_falciparum_3D7 | gene_product=serine/threonine protein phosphatase PP1 | transcript_product=serine/threonine protein phosphatase PP1 | location=Pf3D7_14_v3:575496-577055(+) | protein_length=304 | sequence_SO=chromosome | SO=protein_coding | is_pseudo=false	NaN	1	142.877	2.42877	2673-1uM	DMSO
2673-10uM / DMSO	_DIAWELLR_	462	Specific-N	transcript=PF3D7_0406100.1	-0.62267	0.62267	3.05749e-19	2.2476e-17	54	transcript=PF3D7_0406100.1	NaN	gene=PF3D7_0406100 | organism=Plasmodium_falciparum_3D7 | gene_product=V-type proton ATPase subunit B | transcript_product=V-type proton ATPase subunit B | location=Pf3D7_04_v3:323267-325225(-) | protein_length=494 | sequence_SO=chromosome | SO=protein_coding | is_pseudo=false	NaN	1	-35.0532	0.649468	2673-10uM	DMSO
2673-10uM / DMSO	_AVYLPFTNNLR_	998	Specific	transcript=PF3D7_1311800.1	1.22557	1.22557	3.12474e-19	2.28967e-17	54	transcript=PF3D7_1311800.1	NaN	gene=PF3D7_1311800 | organism=Plasmodium_falciparum_3D7 | gene_product=M1-family alanyl aminopeptidase | transcript_product=M1-family alanyl aminopeptidase | location=Pf3D7_13_v3:501790-505047(+) | protein_length=1085 | sequence_SO=chromosome | SO=protein_coding | is_pseudo=false	NaN	1	133.847	2.33847	2673-10uM	DMSO
2673-1uM / DMSO	_THIVC[Carbamidomethyl (C)]TLGPAC[Carbamidomethyl (C)]K_	39	Specific	transcript=PF3D7_0626800.1	0.567881	0.567881	3.17718e-19	2.32066e-17	108	transcript=PF3D7_0626800.1	NaN	gene=PF3D7_0626800 | organism=Plasmodium_falciparum_3D7 | gene_product=pyruvate kinase | transcript_product=pyruvate kinase | location=Pf3D7_06_v3:1078995-1081320(+) | protein_length=511 | sequence_SO=chromosome | SO=protein_coding | is_pseudo=false	NaN	1	48.2345	1.48234	2673-1uM	DMSO
2673-10uM / DMSO	_VEEIVAPSVEEIVAPT_	419539563	Unspecific	transcript=PF3D7_0220000.1	1.07725	1.07725	3.22441e-19	2.34766e-17	81	transcript=PF3D7_0220000.1	NaN	gene=PF3D7_0220000 | organism=Plasmodium_falciparum_3D7 | gene_product=liver stage antigen 3 | transcript_product=liver stage antigen 3 | location=Pf3D7_02_v3:796752-801586(+) | protein_length=1558 | sequence_SO=chromosome | SO=protein_coding | is_pseudo=false	NaN	1	111.002	2.11002	2673-10uM	DMSO
2673-1uM / DMSO	_LQEAAELEAVELPVPIR_	247	Specific	P02730	0.633135	0.633135	3.24974e-19	2.35859e-17	108	P02730	SLC4A1	Band 3 anion transport protein	B3AT_HUMAN	1	55.0932	1.55093	2673-1uM	DMSO
2673-10uM / DMSO	_SIFSVENVIGEHVK_	64	Specific	transcript=PF3D7_1033400.1	0.449567	0.449567	3.28322e-19	2.37535e-17	108	transcript=PF3D7_1033400.1	NaN	gene=PF3D7_1033400 | organism=Plasmodium_falciparum_3D7 | gene_product=haloacid dehalogenase-like hydrolase | transcript_product=haloacid dehalogenase-like hydrolase | location=Pf3D7_10_v3:1339762-1340628(+) | protein_length=288 | sequence_SO=chromosome | SO=protein_coding | is_pseudo=false	NaN	1	36.563	1.36563	2673-10uM	DMSO
2673-10uM / DMSO	_VYNNEEFHILC[Carbamidomethyl (C)]LLK_	64	Specific	transcript=PF3D7_1012400.1	0.776889	0.776889	3.29902e-19	2.37925e-17	90	transcript=PF3D7_1012400.1	NaN	gene=PF3D7_1012400 | organism=Plasmodium_falciparum_3D7 | gene_product=hypoxanthine-guanine phosphoribosyltransferase | transcript_product=hypoxanthine-guanine phosphoribosyltransferase | location=Pf3D7_10_v3:475327-476563(-) | protein_length=231 | sequence_SO=chromosome | SO=protein_coding | is_pseudo=false	NaN	1	71.3432	1.71343	2673-10uM	DMSO
2673-1uM / DMSO	_LLDFSLLTNQEIK_	721	Specific	transcript=PF3D7_1454400.1	0.570786	0.570786	3.33416e-19	2.39703e-17	54	transcript=PF3D7_1454400.1	NaN	gene=PF3D7_1454400 | organism=Plasmodium_falciparum_3D7 | gene_product=aminopeptidase P | transcript_product=aminopeptidase P | location=Pf3D7_14_v3:2234143-2236476(+) | protein_length=777 | sequence_SO=chromosome | SO=protein_coding | is_pseudo=false	NaN	1	48.5333	1.48533	2673-1uM	DMSO
2673-10uM / DMSO	_AC[Carbamidomethyl (C)]QIISIIAK_	114	Specific-N	transcript=PF3D7_0815200.1	-0.440479	0.440479	3.55295e-19	2.54632e-17	54	transcript=PF3D7_0815200.1	NaN	gene=PF3D7_0815200 | organism=Plasmodium_falciparum_3D7 | gene_product=importin subunit beta, putative | transcript_product=importin subunit beta, putative | location=Pf3D7_08_v3:717113-719746(+) | protein_length=877 | sequence_SO=chromosome | SO=protein_coding | is_pseudo=false	NaN	1	-26.311	0.73689	2673-10uM	DMSO
2673-1uM / DMSO	_VNVDAVGGEALGR_	19	Specific	P02042	0.823098	0.823098	3.94922e-19	2.82147e-17	45	P02042	HBD	Hemoglobin subunit delta	HBD_HUMAN	1	76.9201	1.7692	2673-1uM	DMSO
2673-10uM / DMSO	_AINDPFMDLNHLC[Carbamidomethyl (C)]Y_	32	Unspecific	transcript=PF3D7_1462800.1	0.593687	0.593687	4.09871e-19	2.91915e-17	54	transcript=PF3D7_1462800.1	NaN	gene=PF3D7_1462800 | organism=Plasmodium_falciparum_3D7 | gene_product=glyceraldehyde-3-phosphate dehydrogenase | transcript_product=glyceraldehyde-3-phosphate dehydrogenase | location=Pf3D7_14_v3:2559098-2560347(+) | protein_length=337 | sequence_SO=chromosome | SO=protein_coding | is_pseudo=false	NaN	1	50.9099	1.5091	2673-10uM	DMSO
2673-1uM / DMSO	_TVLGDIATAL_	710	Unspecific	transcript=PF3D7_0815200.1	-0.740106	0.740106	4.18763e-19	2.97322e-17	81	transcript=PF3D7_0815200.1	NaN	gene=PF3D7_0815200 | organism=Plasmodium_falciparum_3D7 | gene_product=importin subunit beta, putative | transcript_product=importin subunit beta, putative | location=Pf3D7_08_v3:717113-719746(+) | protein_length=877 | sequence_SO=chromosome | SO=protein_coding | is_pseudo=false	NaN	1	-40.1304	0.598696	2673-1uM	DMSO
2673-10uM / DMSO	_ESSYEFQNIHEEILTPALNK_	224	Specific	transcript=PF3D7_0317000.1	1.3668	1.3668	4.43824e-19	3.1317e-17	54	transcript=PF3D7_0317000.1	NaN	gene=PF3D7_0317000 | organism=Plasmodium_falciparum_3D7 | gene_product=proteasome subunit alpha type-3, putative | transcript_product=proteasome subunit alpha type-3, putative | location=Pf3D7_03_v3:682795-683685(-) | protein_length=252 | sequence_SO=chromosome | SO=protein_coding | is_pseudo=false	NaN	1	157.898	2.57898	2673-10uM	DMSO
2673-1uM / DMSO	_DGIIVAVDSR_	70	Specific	transcript=PF3D7_1011400.1	0.853457	0.853457	4.43214e-19	3.1317e-17	27	transcript=PF3D7_1011400.1	NaN	gene=PF3D7_1011400 | organism=Plasmodium_falciparum_3D7 | gene_product=proteasome subunit beta type-5 | transcript_product=proteasome subunit beta type-5 | location=Pf3D7_10_v3:441140-441955(-) | protein_length=271 | sequence_SO=chromosome | SO=protein_coding | is_pseudo=false	NaN	1	80.6825	1.80682	2673-1uM	DMSO
2673-10uM / DMSO	_LPVQLQR_	199	Specific	P27105	1.17388	1.17388	4.68973e-19	3.29897e-17	45	P27105	STOM	Erythrocyte band 7 integral membrane protein	STOM_HUMAN	1	125.617	2.25617	2673-10uM	DMSO
2673-10uM / DMSO	_ANYLHSNFQWDK_	606	Specific	transcript=PF3D7_1451100.1	0.561741	0.561741	5.00064e-19	3.50689e-17	90	transcript=PF3D7_1451100.1	NaN	gene=PF3D7_1451100 | organism=Plasmodium_falciparum_3D7 | gene_product=elongation factor 2 | transcript_product=elongation factor 2 | location=Pf3D7_14_v3:2090902-2093400(+) | protein_length=832 | sequence_SO=chromosome | SO=protein_coding | is_pseudo=false	NaN	1	47.605	1.47605	2673-10uM	DMSO
2673-1uM / DMSO	_HSLIDDVEAVAYPSFER_	116	Specific	transcript=PF3D7_0627500.1	0.37165	0.37165	5.08009e-19	3.55171e-17	108	transcript=PF3D7_0627500.1	NaN	gene=PF3D7_0627500 | organism=Plasmodium_falciparum_3D7 | gene_product=protein DJ-1 | transcript_product=protein DJ-1 | location=Pf3D7_06_v3:1101734-1102852(-) | protein_length=189 | sequence_SO=chromosome | SO=protein_coding | is_pseudo=false	NaN	1	29.3832	1.29383	2673-1uM	DMSO
2673-10uM / DMSO	_FLSFPTTK_	34	Specific-N	P69905	-0.424152	0.424152	5.71226e-19	3.96941e-17	108	P69905	HBA1	Hemoglobin subunit alpha	HBA_HUMAN	1	-25.4723	0.745277	2673-10uM	DMSO
2673-10uM / DMSO	_TPFVC[Carbamidomethyl (C)]GC[Carbamidomethyl (C)]TNLGEALR_	125	Specific	transcript=PF3D7_0621200.1	0.486188	0.486188	5.704e-19	3.96941e-17	54	transcript=PF3D7_0621200.1	NaN	gene=PF3D7_0621200 | organism=Plasmodium_falciparum_3D7 | gene_product=pyridoxine biosynthesis protein PDX1 | transcript_product=pyridoxine biosynthesis protein PDX1 | location=Pf3D7_06_v3:871297-872202(-) | protein_length=301 | sequence_SO=chromosome | SO=protein_coding | is_pseudo=false	NaN	1	40.0739	1.40074	2673-10uM	DMSO
2673-10uM / DMSO	_NVGEDLVFDGV_	239	Unspecific	transcript=PF3D7_1311800.1	-1.26956	1.26956	5.89815e-19	4.08617e-17	36	transcript=PF3D7_1311800.1	NaN	gene=PF3D7_1311800 | organism=Plasmodium_falciparum_3D7 | gene_product=M1-family alanyl aminopeptidase | transcript_product=M1-family alanyl aminopeptidase | location=Pf3D7_13_v3:501790-505047(+) | protein_length=1085 | sequence_SO=chromosome | SO=protein_coding | is_pseudo=false	NaN	1	-58.5214	0.414786	2673-10uM	DMSO
2673-10uM / DMSO	_YDSIIVAK_	404	Specific	transcript=PF3D7_0827900.1	0.519053	0.519053	6.11298e-19	4.22221e-17	108	transcript=PF3D7_0827900.1	NaN	gene=PF3D7_0827900 | organism=Plasmodium_falciparum_3D7 | gene_product=protein disulfide isomerase | transcript_product=protein disulfide isomerase | location=Pf3D7_08_v3:1206788-1208394(-) | protein_length=483 | sequence_SO=chromosome | SO=protein_coding | is_pseudo=false	NaN	1	43.3014	1.43301	2673-10uM	DMSO
2673-1uM / DMSO	_GDSIILVSSAMK_	80	Specific	transcript=PF3D7_0819900.1	0.518315	0.518315	6.26436e-19	4.31373e-17	45	transcript=PF3D7_0819900.1	NaN	gene=PF3D7_0819900 | organism=Plasmodium_falciparum_3D7 | gene_product=U6 snRNA-associated Sm-like protein LSm3, putative | transcript_product=U6 snRNA-associated Sm-like protein LSm3, putative | location=Pf3D7_08_v3:899004-899657(-) | protein_length=91 | sequence_SO=chromosome | SO=protein_coding | is_pseudo=false	NaN	1	43.2282	1.43228	2673-1uM	DMSO
2673-10uM / DMSO	_TPQPETAIVSGPQPK_	8	Specific	transcript=PF3D7_0516200.1	-1.5896	1.5896	6.90982e-19	4.74391e-17	81	transcript=PF3D7_0516200.1	NaN	gene=PF3D7_0516200 | organism=Plasmodium_falciparum_3D7 | gene_product=40S ribosomal protein S11 | transcript_product=40S ribosomal protein S11 | location=Pf3D7_05_v3:675809-676614(-) | protein_length=151 | sequence_SO=chromosome | SO=protein_coding | is_pseudo=false	NaN	1	-66.7738	0.332262	2673-10uM	DMSO
2673-10uM / DMSO	_YLVADHVVVIS_	128	Unspecific	transcript=PF3D7_0708400.1	-1.02561	1.02561	7.01793e-19	4.80371e-17	54	transcript=PF3D7_0708400.1	NaN	gene=PF3D7_0708400 | organism=Plasmodium_falciparum_3D7 | gene_product=heat shock protein 90 | transcript_product=heat shock protein 90 | location=Pf3D7_07_v3:381592-384614(+) | protein_length=745 | sequence_SO=chromosome | SO=protein_coding | is_pseudo=false	NaN	1	-50.8797	0.491203	2673-10uM	DMSO
2673-1uM / DMSO	_VYNNEEFHILC[Carbamidomethyl (C)]LLK_	64	Specific	transcript=PF3D7_1012400.1	0.556431	0.556431	7.4185e-19	5.06274e-17	90	transcript=PF3D7_1012400.1	NaN	gene=PF3D7_1012400 | organism=Plasmodium_falciparum_3D7 | gene_product=hypoxanthine-guanine phosphoribosyltransferase | transcript_product=hypoxanthine-guanine phosphoribosyltransferase | location=Pf3D7_10_v3:475327-476563(-) | protein_length=231 | sequence_SO=chromosome | SO=protein_coding | is_pseudo=false	NaN	1	47.0627	1.47063	2673-1uM	DMSO
2673-10uM / DMSO	_[Acetyl (Protein N-term)]SLLPTAAPTPNKDNK_	2	Specific-N	transcript=PF3D7_1209200.1	-1.53512	1.53512	8.87906e-19	6.02354e-17	36	transcript=PF3D7_1209200.1	NaN	gene=PF3D7_1209200 | organism=Plasmodium_falciparum_3D7 | gene_product=U6 snRNA-associated Sm-like protein LSm7, putative | transcript_product=U6 snRNA-associated Sm-like protein LSm7, putative | location=Pf3D7_12_v3:427272-427978(+) | protein_length=108 | sequence_SO=chromosome | SO=protein_coding | is_pseudo=false	NaN	1	-65.495	0.34505	2673-10uM	DMSO
2673-1uM / DMSO	_FDLSHGSAQ_	47	Unspecific	P69905	-0.348967	0.348967	9.26361e-19	6.24733e-17	108	P69905	HBA1	Hemoglobin subunit alpha	HBA_HUMAN	1	-21.4854	0.785146	2673-1uM	DMSO
2673-10uM / DMSO	_TLIYVIDK_	220	Specific	transcript=PF3D7_0518300.1	0.459556	0.459556	9.24791e-19	6.24733e-17	108	transcript=PF3D7_0518300.1	NaN	gene=PF3D7_0518300 | organism=Plasmodium_falciparum_3D7 | gene_product=proteasome subunit beta type-1, putative | transcript_product=proteasome subunit beta type-1, putative | location=Pf3D7_05_v3:759831-760998(-) | protein_length=240 | sequence_SO=chromosome | SO=protein_coding | is_pseudo=false	NaN	1	37.5118	1.37512	2673-10uM	DMSO
2673-1uM / DMSO	_AGSC[Carbamidomethyl (C)]GSLQPDLIK_	89	Specific	transcript=PF3D7_0513300.1	0.613191	0.613191	9.70978e-19	6.52897e-17	54	transcript=PF3D7_0513300.1	NaN	gene=PF3D7_0513300 | organism=Plasmodium_falciparum_3D7 | gene_product=purine nucleoside phosphorylase | transcript_product=purine nucleoside phosphorylase | location=Pf3D7_05_v3:569182-569919(-) | protein_length=245 | sequence_SO=chromosome | SO=protein_coding | is_pseudo=false	NaN	1	52.9639	1.52964	2673-1uM	DMSO
2673-1uM / DMSO	_TLENVFLHIK_	131	Specific-N	transcript=PF3D7_0109400.1	-0.403316	0.403316	9.99304e-19	6.69973e-17	90	transcript=PF3D7_0109400.1	NaN	gene=PF3D7_0109400 | organism=Plasmodium_falciparum_3D7 | gene_product=tubulin-specific chaperone a, putative | transcript_product=tubulin-specific chaperone a, putative | location=Pf3D7_01_v3:374439-375087(-) | protein_length=166 | sequence_SO=chromosome | SO=protein_coding | is_pseudo=false	NaN	1	-24.3881	0.756119	2673-1uM	DMSO
2673-10uM / DMSO	_TVPQADVPTEGMDVPFGF_	17	Unspecific	transcript=PF3D7_1370300.1	1.461	1.461	1.02491e-18	6.85133e-17	36	transcript=PF3D7_1370300.1	NaN	gene=PF3D7_1370300 | organism=Plasmodium_falciparum_3D7 | gene_product=membrane associated histidine-rich protein 1 | transcript_product=membrane associated histidine-rich protein 1 | location=Pf3D7_13_v3:2787972-2788913(+) | protein_length=249 | sequence_SO=chromosome | SO=protein_coding | is_pseudo=false	NaN	1	175.299	2.75299	2673-10uM	DMSO
2673-10uM / DMSO	_FLC[Carbamidomethyl (C)]VSHGVGSAGC[Carbamidomethyl (C)]AVC[Carbamidomethyl (C)]FEELC[Carbamidomethyl (C)]QNGAK_	59	Specific	transcript=PF3D7_0513300.1	0.874808	0.874808	1.08074e-18	7.20344e-17	45	transcript=PF3D7_0513300.1	NaN	gene=PF3D7_0513300 | organism=Plasmodium_falciparum_3D7 | gene_product=purine nucleoside phosphorylase | transcript_product=purine nucleoside phosphorylase | location=Pf3D7_05_v3:569182-569919(-) | protein_length=245 | sequence_SO=chromosome | SO=protein_coding | is_pseudo=false	NaN	1	83.3764	1.83376	2673-10uM	DMSO
2673-10uM / DMSO	_LEDSSPLSHPIRPE_	553	Unspecific	transcript=PF3D7_1311800.1	-1.14034	1.14034	1.08706e-18	7.22453e-17	54	transcript=PF3D7_1311800.1	NaN	gene=PF3D7_1311800 | organism=Plasmodium_falciparum_3D7 | gene_product=M1-family alanyl aminopeptidase | transcript_product=M1-family alanyl aminopeptidase | location=Pf3D7_13_v3:501790-505047(+) | protein_length=1085 | sequence_SO=chromosome | SO=protein_coding | is_pseudo=false	NaN	1	-54.6346	0.453654	2673-10uM	DMSO
2673-1uM / DMSO	_VMVLDFVTPTPLGTR_	88;188;107;38;188	Specific	A0A087WSW9;A0A087WSY9;A0A182DWI3;F8W809;Q16881	0.856562	0.856562	1.11108e-18	7.36276e-17	36	A0A087WSW9;A0A087WSY9;A0A182DWI3;F8W809;Q16881	TXNRD1	Thioredoxin reductase 1, cytoplasmic;Thioredoxin reductase 1, cytoplasmic;Thioredoxin reductase 1, cytoplasmic;Thioredoxin reductase 1, cytoplasmic;Thioredoxin reductase 1, cytoplasmic	A0A087WSW9_HUMAN;A0A087WSY9_HUMAN;A0A182DWI3_HUMAN;F8W809_HUMAN;TRXR1_HUMAN	1	81.0718	1.81072	2673-1uM	DMSO
2673-10uM / DMSO	_HSHAGELEAL_	161	Specific-C	P02730	-1.2409	1.2409	1.12776e-18	7.45172e-17	54	P02730	SLC4A1	Band 3 anion transport protein	B3AT_HUMAN	1	-57.6892	0.423108	2673-10uM	DMSO
2673-10uM / DMSO	_LYELIITR_	655	Specific	P07384	0.382755	0.382755	1.14191e-18	7.52342e-17	54	P07384	CAPN1	Calpain-1 catalytic subunit	CAN1_HUMAN	1	30.383	1.30383	2673-10uM	DMSO
2673-10uM / DMSO	_DMTFEQAEILALTVLR_	190	Specific	transcript=PF3D7_0727400.1	1.38209	1.38209	1.16667e-18	7.66448e-17	54	transcript=PF3D7_0727400.1	NaN	gene=PF3D7_0727400 | organism=Plasmodium_falciparum_3D7 | gene_product=proteasome subunit alpha type-5, putative | transcript_product=proteasome subunit alpha type-5, putative | location=Pf3D7_07_v3:1162710-1163831(+) | protein_length=256 | sequence_SO=chromosome | SO=protein_coding | is_pseudo=false	NaN	1	160.645	2.60645	2673-10uM	DMSO
2673-1uM / DMSO	_YADINNISSSVK_	541	Specific	transcript=PF3D7_1446200.1	1.16321	1.16321	1.2123e-18	7.94142e-17	54	transcript=PF3D7_1446200.1	NaN	gene=PF3D7_1446200 | organism=Plasmodium_falciparum_3D7 | gene_product=M17 leucyl aminopeptidase | transcript_product=M17 leucyl aminopeptidase | location=Pf3D7_14_v3:1893200-1895017(-) | protein_length=605 | sequence_SO=chromosome | SO=protein_coding | is_pseudo=false	NaN	1	123.955	2.23955	2673-1uM	DMSO
2673-10uM / DMSO	_FFLNTVK_	14	Specific	transcript=PF3D7_1034900.1	0.784909	0.784909	1.31242e-18	8.57274e-17	45	transcript=PF3D7_1034900.1	NaN	gene=PF3D7_1034900 | organism=Plasmodium_falciparum_3D7 | gene_product=methionine--tRNA ligase | transcript_product=methionine--tRNA ligase | location=Pf3D7_10_v3:1383450-1386119(+) | protein_length=889 | sequence_SO=chromosome | SO=protein_coding | is_pseudo=false	NaN	1	72.2984	1.72298	2673-10uM	DMSO
2673-10uM / DMSO	_GVSVDSQFTHL_	74	Unspecific	P32119	-0.391468	0.391468	1.41247e-18	9.19443e-17	54	P32119	PRDX2	Peroxiredoxin-2	PRDX2_HUMAN	1	-23.7647	0.762353	2673-10uM	DMSO
2673-1uM / DMSO	_IVC[Carbamidomethyl (C)]LSDEVR_	5	Specific	transcript=PF3D7_1127100.1	2.16816	2.16816	1.41564e-18	9.19443e-17	36	transcript=PF3D7_1127100.1	NaN	gene=PF3D7_1127100 | organism=Plasmodium_falciparum_3D7 | gene_product=deoxyuridine 5'-triphosphate nucleotidohydrolase | transcript_product=deoxyuridine 5'-triphosphate nucleotidohydrolase | location=Pf3D7_11_v3:1060262-1060783(-) | protein_length=173 | sequence_SO=chromosome | SO=protein_coding | is_pseudo=false	NaN	1	349.449	4.49449	2673-1uM	DMSO
2673-10uM / DMSO	_LVLPSLISS_	94	Specific-C	Q13228	-0.715486	0.715486	1.58495e-18	1.02649e-16	81	Q13228	SELENBP1	Selenium-binding protein 1	SBP1_HUMAN	1	-39.1	0.609	2673-10uM	DMSO
2673-10uM / DMSO	_HLPHPTIYPK_	239	Specific-N	transcript=PF3D7_1328100.1	-0.659247	0.659247	1.62525e-18	1.04726e-16	63	transcript=PF3D7_1328100.1	NaN	gene=PF3D7_1328100 | organism=Plasmodium_falciparum_3D7 | gene_product=proteasome subunit beta type-7, putative | transcript_product=proteasome subunit beta type-7, putative | location=Pf3D7_13_v3:1184208-1185020(+) | protein_length=270 | sequence_SO=chromosome | SO=protein_coding | is_pseudo=false	NaN	1	-36.6791	0.633209	2673-10uM	DMSO
2673-1uM / DMSO	_NEAGVPMVNLL_	93	Specific-C	transcript=PF3D7_1444800.1	0.741858	0.741858	1.62618e-18	1.04726e-16	54	transcript=PF3D7_1444800.1	NaN	gene=PF3D7_1444800 | organism=Plasmodium_falciparum_3D7 | gene_product=fructose-bisphosphate aldolase | transcript_product=fructose-bisphosphate aldolase | location=Pf3D7_14_v3:1844041-1845617(-) | protein_length=369 | sequence_SO=chromosome | SO=protein_coding | is_pseudo=false	NaN	1	67.2329	1.67233	2673-1uM	DMSO
2673-10uM / DMSO	_VFNPNEMIDVISVTK_	205	Specific-N	transcript=PF3D7_1027800.1	-0.320352	0.320352	1.74856e-18	1.12291e-16	108	transcript=PF3D7_1027800.1	NaN	gene=PF3D7_1027800 | organism=Plasmodium_falciparum_3D7 | gene_product=60S ribosomal protein L3 | transcript_product=60S ribosomal protein L3 | location=Pf3D7_10_v3:1153271-1154431(-) | protein_length=386 | sequence_SO=chromosome | SO=protein_coding | is_pseudo=false	NaN	1	-19.9126	0.800874	2673-10uM	DMSO
2673-1uM / DMSO	_GWDIC[Carbamidomethyl (C)]VSSMR_	77	Specific	transcript=PF3D7_1247400.1	1.81501	1.81501	1.82846e-18	1.17093e-16	27	transcript=PF3D7_1247400.1	NaN	gene=PF3D7_1247400 | organism=Plasmodium_falciparum_3D7 | gene_product=peptidyl-prolyl cis-trans isomerase FKBP35 | transcript_product=peptidyl-prolyl cis-trans isomerase FKBP35 | location=Pf3D7_12_v3:1955124-1956038(-) | protein_length=304 | sequence_SO=chromosome | SO=protein_coding | is_pseudo=false	NaN	1	251.863	3.51863	2673-1uM	DMSO
2673-10uM / DMSO	_NTHPVATPVNWK_	168	Specific-N	transcript=PF3D7_0802200.1	-0.757164	0.757164	1.87681e-18	1.19854e-16	54	transcript=PF3D7_0802200.1	NaN	gene=PF3D7_0802200 | organism=Plasmodium_falciparum_3D7 | gene_product=1-cys peroxiredoxin | transcript_product=1-cys peroxiredoxin | location=Pf3D7_08_v3:165416-166078(+) | protein_length=220 | sequence_SO=chromosome | SO=protein_coding | is_pseudo=false	NaN	1	-40.8342	0.591658	2673-10uM	DMSO
2673-10uM / DMSO	_KPMVVETFTEYPPLGR_	394;394	Specific	transcript=PF3D7_1357000.1;transcript=PF3D7_1357100.1	0.455609	0.455609	1.91129e-18	1.21716e-16	90	transcript=PF3D7_1357000.1;transcript=PF3D7_1357100.1	NaN	gene=PF3D7_1357000 | organism=Plasmodium_falciparum_3D7 | gene_product=elongation factor 1-alpha | transcript_product=elongation factor 1-alpha | location=Pf3D7_13_v3:2265817-2267148(-) | protein_length=443 | sequence_SO=chromosome | SO=protein_coding | is_pseudo=false;gene=PF3D7_1357100 | organism=Plasmodium_falciparum_3D7 | gene_product=elongation factor 1-alpha | transcript_product=elongation …	NaN	1	37.1361	1.37136	2673-10uM	DMSO
2673-10uM / DMSO	_TNATIKPAIYLLDSGGQYLHGTTDVTR_	558	Specific	transcript=PF3D7_1454400.1	1.73124	1.73124	2.05059e-18	1.30224e-16	63	transcript=PF3D7_1454400.1	NaN	gene=PF3D7_1454400 | organism=Plasmodium_falciparum_3D7 | gene_product=aminopeptidase P | transcript_product=aminopeptidase P | location=Pf3D7_14_v3:2234143-2236476(+) | protein_length=777 | sequence_SO=chromosome | SO=protein_coding | is_pseudo=false	NaN	1	232.014	3.32014	2673-10uM	DMSO
2673-10uM / DMSO	_YDLEQIILR_	341	Specific-N	transcript=PF3D7_0922200.1	0.834468	0.834468	2.16972e-18	1.37408e-16	54	transcript=PF3D7_0922200.1	NaN	gene=PF3D7_0922200 | organism=Plasmodium_falciparum_3D7 | gene_product=S-adenosylmethionine synthetase | transcript_product=S-adenosylmethionine synthetase | location=Pf3D7_09_v3:903362-904570(+) | protein_length=402 | sequence_SO=chromosome | SO=protein_coding | is_pseudo=false	NaN	1	78.32	1.7832	2673-10uM	DMSO
2673-10uM / DMSO	_ILC[Carbamidomethyl (C)]QLLNNQNLK_	296	Specific	transcript=PF3D7_0204500.1	0.596229	0.596229	2.31537e-18	1.46227e-16	54	transcript=PF3D7_0204500.1	NaN	gene=PF3D7_0204500 | organism=Plasmodium_falciparum_3D7 | gene_product=aspartate transaminase | transcript_product=aspartate transaminase | location=Pf3D7_02_v3:198353-199570(-) | protein_length=405 | sequence_SO=chromosome | SO=protein_coding | is_pseudo=false	NaN	1	51.176	1.51176	2673-10uM	DMSO
2673-1uM / DMSO	_ALLTPVAIAA_	380	Specific-C	P00390	-1.53527	1.53527	2.39633e-18	1.50922e-16	54	P00390	GSR	Glutathione reductase, mitochondrial	GSHR_HUMAN	1	-65.4984	0.345016	2673-1uM	DMSO
2673-10uM / DMSO	_DISLAPFGK_	10	Specific	transcript=PF3D7_0520900.1	-0.336637	0.336637	2.68375e-18	1.6856e-16	99	transcript=PF3D7_0520900.1	NaN	gene=PF3D7_0520900 | organism=Plasmodium_falciparum_3D7 | gene_product=adenosylhomocysteinase | transcript_product=adenosylhomocysteinase | location=Pf3D7_05_v3:857038-858477(+) | protein_length=479 | sequence_SO=chromosome | SO=protein_coding | is_pseudo=false	NaN	1	-20.8115	0.791885	2673-10uM	DMSO
2673-10uM / DMSO	_LTQELFK_	124	Specific	transcript=PF3D7_1328100.1	0.406582	0.406582	2.71374e-18	1.69977e-16	45	transcript=PF3D7_1328100.1	NaN	gene=PF3D7_1328100 | organism=Plasmodium_falciparum_3D7 | gene_product=proteasome subunit beta type-7, putative | transcript_product=proteasome subunit beta type-7, putative | location=Pf3D7_13_v3:1184208-1185020(+) | protein_length=270 | sequence_SO=chromosome | SO=protein_coding | is_pseudo=false	NaN	1	32.5541	1.32554	2673-10uM	DMSO
2673-10uM / DMSO	_DMLEAIDKF_	157	Unspecific	transcript=PF3D7_0517300.1	1.93256	1.93256	2.87352e-18	1.79004e-16	36	transcript=PF3D7_0517300.1	NaN	gene=PF3D7_0517300 | organism=Plasmodium_falciparum_3D7 | gene_product=serine/arginine-rich splicing factor 1 | transcript_product=serine/arginine-rich splicing factor 1 | location=Pf3D7_05_v3:724681-725751(-) | protein_length=298 | sequence_SO=chromosome | SO=protein_coding | is_pseudo=false	NaN	1	281.733	3.81733	2673-10uM	DMSO
2673-10uM / DMSO	_NAHILSQLFLK_	142	Specific	transcript=PF3D7_1428300.1	0.580095	0.580095	2.87182e-18	1.79004e-16	90	transcript=PF3D7_1428300.1	NaN	gene=PF3D7_1428300 | organism=Plasmodium_falciparum_3D7 | gene_product=proliferation-associated protein 2g4, putative | transcript_product=proliferation-associated protein 2g4, putative | location=Pf3D7_14_v3:1105200-1106514(-) | protein_length=377 | sequence_SO=chromosome | SO=protein_coding | is_pseudo=false	NaN	1	49.4948	1.49495	2673-10uM	DMSO
2673-10uM / DMSO	_IYLLDSGGQYLHGT_	566	Unspecific	transcript=PF3D7_1454400.1	-0.62779	0.62779	3.09878e-18	1.9199e-16	54	transcript=PF3D7_1454400.1	NaN	gene=PF3D7_1454400 | organism=Plasmodium_falciparum_3D7 | gene_product=aminopeptidase P | transcript_product=aminopeptidase P | location=Pf3D7_14_v3:2234143-2236476(+) | protein_length=777 | sequence_SO=chromosome | SO=protein_coding | is_pseudo=false	NaN	1	-35.2833	0.647167	2673-10uM	DMSO
2673-10uM / DMSO	_SQIENAISDVMGKPL_	22	Unspecific	transcript=PF3D7_1229400.1	-1.54853	1.54853	3.11773e-18	1.92642e-16	54	transcript=PF3D7_1229400.1	NaN	gene=PF3D7_1229400 | organism=Plasmodium_falciparum_3D7 | gene_product=macrophage migration inhibitory factor | transcript_product=macrophage migration inhibitory factor | location=Pf3D7_12_v3:1208912-1209542(+) | protein_length=116 | sequence_SO=chromosome | SO=protein_coding | is_pseudo=false	NaN	1	-65.8141	0.341859	2673-10uM	DMSO
2673-1uM / DMSO	_KESTLHLVLR_	63,139,215,291,367;63	Specific-N	transcript=PF3D7_1211800.1;transcript=PF3D7_1365900.1	-0.629223	0.629223	3.17685e-18	1.95766e-16	108	transcript=PF3D7_1211800.1;transcript=PF3D7_1365900.1	NaN	gene=PF3D7_1211800 | organism=Plasmodium_falciparum_3D7 | gene_product=polyubiquitin | transcript_product=polyubiquitin | location=Pf3D7_12_v3:526109-527780(+) | protein_length=381 | sequence_SO=chromosome | SO=protein_coding | is_pseudo=false;gene=PF3D7_1365900 | organism=Plasmodium_falciparum_3D7 | gene_product=ubiquitin-60S ribosomal protein L40 | transcript_product=ubiquitin-60S ribosomal pro…	NaN	1	-35.3476	0.646524	2673-1uM	DMSO
2673-1uM / DMSO	_ADGLAVIGVLMK_	139	Specific	P00915	0.549339	0.549339	3.20611e-18	1.97038e-16	54	P00915	CA1	Carbonic anhydrase 1	CAH1_HUMAN	1	46.3415	1.46341	2673-1uM	DMSO
2673-10uM / DMSO	_LSQEDPDYGIR_	253	Specific	P04040	0.693221	0.693221	3.22465e-18	1.97646e-16	45	P04040	CAT	Catalase	CATA_HUMAN	1	61.6889	1.61689	2673-10uM	DMSO
2673-10uM / DMSO	_TC[Carbamidomethyl (C)]PFAAAVC[Carbamidomethyl (C)]VKPEFVK_	41	Specific	transcript=PF3D7_1021600.1	0.635443	0.635443	3.23365e-18	1.97667e-16	81	transcript=PF3D7_1021600.1	NaN	gene=PF3D7_1021600 | organism=Plasmodium_falciparum_3D7 | gene_product=deoxyribose-phosphate aldolase, putative | transcript_product=deoxyribose-phosphate aldolase, putative | location=Pf3D7_10_v3:871095-871886(+) | protein_length=263 | sequence_SO=chromosome | SO=protein_coding | is_pseudo=false	NaN	1	55.3415	1.55341	2673-10uM	DMSO
2673-10uM / DMSO	_IYLLDSGGQYLHGTTDVTR_	566	Specific-N	transcript=PF3D7_1454400.1	0.696383	0.696383	3.24581e-18	1.97882e-16	54	transcript=PF3D7_1454400.1	NaN	gene=PF3D7_1454400 | organism=Plasmodium_falciparum_3D7 | gene_product=aminopeptidase P | transcript_product=aminopeptidase P | location=Pf3D7_14_v3:2234143-2236476(+) | protein_length=777 | sequence_SO=chromosome | SO=protein_coding | is_pseudo=false	NaN	1	62.0437	1.62044	2673-10uM	DMSO
2673-10uM / DMSO	_YFDALTNADFLLITK_	257	Specific	transcript=PF3D7_0922600.1	0.652419	0.652419	3.2727e-18	1.9899e-16	54	transcript=PF3D7_0922600.1	NaN	gene=PF3D7_0922600 | organism=Plasmodium_falciparum_3D7 | gene_product=glutamine synthetase, putative | transcript_product=glutamine synthetase, putative | location=Pf3D7_09_v3:916603-918674(+) | protein_length=543 | sequence_SO=chromosome | SO=protein_coding | is_pseudo=false	NaN	1	57.1802	1.5718	2673-10uM	DMSO
2673-10uM / DMSO	_AFPC[Carbamidomethyl (C)]ATQNEINLEDAK_	339	Specific-N	transcript=PF3D7_1416500.1	0.227115	0.227115	3.2963e-18	1.99894e-16	45	transcript=PF3D7_1416500.1	NaN	gene=PF3D7_1416500 | organism=Plasmodium_falciparum_3D7 | gene_product=NADP-specific glutamate dehydrogenase | transcript_product=NADP-specific glutamate dehydrogenase | location=Pf3D7_14_v3:667412-668824(+) | protein_length=470 | sequence_SO=chromosome | SO=protein_coding | is_pseudo=false	NaN	1	17.0492	1.17049	2673-10uM	DMSO
2673-10uM / DMSO	_LLTLMDGLK_	328	Specific-N	P55072	-0.483338	0.483338	3.40557e-18	2.05974e-16	54	P55072	VCP	Transitional endoplasmic reticulum ATPase	TERA_HUMAN	1	-28.4679	0.715321	2673-10uM	DMSO
2673-10uM / DMSO	_ELQLIDIT_	88	Unspecific	transcript=PF3D7_1204300.1	0.957409	0.957409	3.50851e-18	2.1164e-16	36	transcript=PF3D7_1204300.1	NaN	gene=PF3D7_1204300 | organism=Plasmodium_falciparum_3D7 | gene_product=eukaryotic translation initiation factor 5A | transcript_product=eukaryotic translation initiation factor 5A | location=Pf3D7_12_v3:205491-205976(-) | protein_length=161 | sequence_SO=chromosome | SO=protein_coding | is_pseudo=false	NaN	1	94.182	1.94182	2673-10uM	DMSO
2673-1uM / DMSO	_YLC[Carbamidomethyl (C)]SLSDSEVYHFAK_	175	Specific	transcript=PF3D7_0621200.1	0.692597	0.692597	3.68955e-18	2.21975e-16	81	transcript=PF3D7_0621200.1	NaN	gene=PF3D7_0621200 | organism=Plasmodium_falciparum_3D7 | gene_product=pyridoxine biosynthesis protein PDX1 | transcript_product=pyridoxine biosynthesis protein PDX1 | location=Pf3D7_06_v3:871297-872202(-) | protein_length=301 | sequence_SO=chromosome | SO=protein_coding | is_pseudo=false	NaN	1	61.619	1.61619	2673-1uM	DMSO
2673-1uM / DMSO	_IIDMLSEYSDITC[Carbamidomethyl (C)]R_	32	Specific	transcript=PF3D7_1354500.1	0.435018	0.435018	3.79158e-18	2.27515e-16	54	transcript=PF3D7_1354500.1	NaN	gene=PF3D7_1354500 | organism=Plasmodium_falciparum_3D7 | gene_product=adenylosuccinate synthetase | transcript_product=adenylosuccinate synthetase | location=Pf3D7_13_v3:2174346-2175797(+) | protein_length=442 | sequence_SO=chromosome | SO=protein_coding | is_pseudo=false	NaN	1	35.1928	1.35193	2673-1uM	DMSO
2673-10uM / DMSO	_TPLWNGFK_	178	Specific	transcript=PF3D7_1012400.1	0.381521	0.381521	3.8067e-18	2.27824e-16	54	transcript=PF3D7_1012400.1	NaN	gene=PF3D7_1012400 | organism=Plasmodium_falciparum_3D7 | gene_product=hypoxanthine-guanine phosphoribosyltransferase | transcript_product=hypoxanthine-guanine phosphoribosyltransferase | location=Pf3D7_10_v3:475327-476563(-) | protein_length=231 | sequence_SO=chromosome | SO=protein_coding | is_pseudo=false	NaN	1	30.2714	1.30271	2673-10uM	DMSO
2673-1uM / DMSO	_HLPAEFTPAVH_	113	Unspecific	P69905	-0.526438	0.526438	3.85138e-18	2.29298e-16	90	P69905	HBA1	Hemoglobin subunit alpha	HBA_HUMAN	1	-30.5733	0.694267	2673-1uM	DMSO
2673-1uM / DMSO	_LVLPSLISS_	94	Specific-C	Q13228	-0.773921	0.773921	3.85004e-18	2.29298e-16	81	Q13228	SELENBP1	Selenium-binding protein 1	SBP1_HUMAN	1	-41.5174	0.584826	2673-1uM	DMSO
2673-1uM / DMSO	_YDSVHGQFPC[Carbamidomethyl (C)]EVTHADGFLLIGEK_	49	Specific	transcript=PF3D7_1462800.1	0.398419	0.398419	4.22295e-18	2.50767e-16	99	transcript=PF3D7_1462800.1	NaN	gene=PF3D7_1462800 | organism=Plasmodium_falciparum_3D7 | gene_product=glyceraldehyde-3-phosphate dehydrogenase | transcript_product=glyceraldehyde-3-phosphate dehydrogenase | location=Pf3D7_14_v3:2559098-2560347(+) | protein_length=337 | sequence_SO=chromosome | SO=protein_coding | is_pseudo=false	NaN	1	31.8062	1.31806	2673-1uM	DMSO
2673-10uM / DMSO	_IEFPNPNVEAR_	344	Specific	transcript=PF3D7_1248900.1	-0.435223	0.435223	4.30466e-18	2.54957e-16	45	transcript=PF3D7_1248900.1	NaN	gene=PF3D7_1248900 | organism=Plasmodium_falciparum_3D7 | gene_product=26S protease regulatory subunit 8, putative | transcript_product=26S protease regulatory subunit 8, putative | location=Pf3D7_12_v3:2002723-2004030(-) | protein_length=435 | sequence_SO=chromosome | SO=protein_coding | is_pseudo=false	NaN	1	-26.0421	0.739579	2673-10uM	DMSO
2673-10uM / DMSO	_EMFNNVLK_	80	Specific	transcript=PF3D7_0626800.1	0.286291	0.286291	4.45699e-18	2.63296e-16	54	transcript=PF3D7_0626800.1	NaN	gene=PF3D7_0626800 | organism=Plasmodium_falciparum_3D7 | gene_product=pyruvate kinase | transcript_product=pyruvate kinase | location=Pf3D7_06_v3:1078995-1081320(+) | protein_length=511 | sequence_SO=chromosome | SO=protein_coding | is_pseudo=false	NaN	1	21.9501	1.2195	2673-10uM	DMSO
2673-10uM / DMSO	_EDSSPLSHPIRPE_	554	Unspecific	transcript=PF3D7_1311800.1	-0.996937	0.996937	4.77956e-18	2.81624e-16	54	transcript=PF3D7_1311800.1	NaN	gene=PF3D7_1311800 | organism=Plasmodium_falciparum_3D7 | gene_product=M1-family alanyl aminopeptidase | transcript_product=M1-family alanyl aminopeptidase | location=Pf3D7_13_v3:501790-505047(+) | protein_length=1085 | sequence_SO=chromosome | SO=protein_coding | is_pseudo=false	NaN	1	-49.8937	0.501063	2673-10uM	DMSO
2673-10uM / DMSO	_YSGIVIGK_	163	Specific	transcript=PF3D7_0317000.1	0.510236	0.510236	5.07549e-18	2.98293e-16	72	transcript=PF3D7_0317000.1	NaN	gene=PF3D7_0317000 | organism=Plasmodium_falciparum_3D7 | gene_product=proteasome subunit alpha type-3, putative | transcript_product=proteasome subunit alpha type-3, putative | location=Pf3D7_03_v3:682795-683685(-) | protein_length=252 | sequence_SO=chromosome | SO=protein_coding | is_pseudo=false	NaN	1	42.4283	1.42428	2673-10uM	DMSO
2673-10uM / DMSO	_QLAGEDMEISVK_	553	Specific	P07384	0.297274	0.297274	5.15236e-18	3.02034e-16	54	P07384	CAPN1	Calpain-1 catalytic subunit	CAN1_HUMAN	1	22.8821	1.22882	2673-10uM	DMSO
2673-10uM / DMSO	_DSIHVPNIYKPQNKPEPY_	665	Specific-C	transcript=PF3D7_0930300.1	0.512133	0.512133	5.22971e-18	3.05784e-16	54	transcript=PF3D7_0930300.1	NaN	gene=PF3D7_0930300 | organism=Plasmodium_falciparum_3D7 | gene_product=merozoite surface protein 1 | transcript_product=merozoite surface protein 1 | location=Pf3D7_09_v3:1201812-1206974(+) | protein_length=1720 | sequence_SO=chromosome | SO=protein_coding | is_pseudo=false	NaN	1	42.6157	1.42616	2673-10uM	DMSO
2673-10uM / DMSO	_HAQIPVWIR_	164	Specific	transcript=PF3D7_0108300.1	0.5894	0.5894	5.28212e-18	3.08061e-16	45	transcript=PF3D7_0108300.1	NaN	gene=PF3D7_0108300 | organism=Plasmodium_falciparum_3D7 | gene_product=conserved Plasmodium protein, unknown function | transcript_product=conserved Plasmodium protein, unknown function | location=Pf3D7_01_v3:337168-343833(+) | protein_length=2221 | sequence_SO=chromosome | SO=protein_coding | is_pseudo=false	NaN	1	50.4621	1.50462	2673-10uM	DMSO
2673-10uM / DMSO	_YLHELLTR_	63	Specific-N	transcript=PF3D7_0803800.1	-0.603784	0.603784	5.56968e-18	3.24005e-16	45	transcript=PF3D7_0803800.1	NaN	gene=PF3D7_0803800 | organism=Plasmodium_falciparum_3D7 | gene_product=proteasome subunit beta type-4 | transcript_product=proteasome subunit beta type-4 | location=Pf3D7_08_v3:233467-234426(-) | protein_length=265 | sequence_SO=chromosome | SO=protein_coding | is_pseudo=false	NaN	1	-34.1974	0.658026	2673-10uM	DMSO
2673-1uM / DMSO	_LSQIENAISDVMGK_	21	Specific-N	transcript=PF3D7_1229400.1	-0.781118	0.781118	5.78096e-18	3.35442e-16	54	transcript=PF3D7_1229400.1	NaN	gene=PF3D7_1229400 | organism=Plasmodium_falciparum_3D7 | gene_product=macrophage migration inhibitory factor | transcript_product=macrophage migration inhibitory factor | location=Pf3D7_12_v3:1208912-1209542(+) | protein_length=116 | sequence_SO=chromosome | SO=protein_coding | is_pseudo=false	NaN	1	-41.8084	0.581916	2673-1uM	DMSO
2673-1uM / DMSO	_DDDGYDLDSFMIPAHYK_	21	Specific	transcript=PF3D7_1012400.1	0.352785	0.352785	6.18015e-18	3.57698e-16	54	transcript=PF3D7_1012400.1	NaN	gene=PF3D7_1012400 | organism=Plasmodium_falciparum_3D7 | gene_product=hypoxanthine-guanine phosphoribosyltransferase | transcript_product=hypoxanthine-guanine phosphoribosyltransferase | location=Pf3D7_10_v3:475327-476563(-) | protein_length=231 | sequence_SO=chromosome | SO=protein_coding | is_pseudo=false	NaN	1	27.7023	1.27702	2673-1uM	DMSO
2673-10uM / DMSO	_YQSNIENC[Carbamidomethyl (C)]ILK_	268	Specific	transcript=PF3D7_1030500.1	0.632455	0.632455	6.35301e-18	3.66774e-16	54	transcript=PF3D7_1030500.1	NaN	gene=PF3D7_1030500 | organism=Plasmodium_falciparum_3D7 | gene_product=26S proteasome regulatory subunit RPN9, putative | transcript_product=26S proteasome regulatory subunit RPN9, putative | location=Pf3D7_10_v3:1244215-1245396(+) | protein_length=393 | sequence_SO=chromosome | SO=protein_coding | is_pseudo=false	NaN	1	55.0201	1.5502	2673-10uM	DMSO
2673-10uM / DMSO	_SYIVSLPQDR_	822	Specific	transcript=PF3D7_1311800.1	1.58183	1.58183	6.43097e-18	3.70339e-16	27	transcript=PF3D7_1311800.1	NaN	gene=PF3D7_1311800 | organism=Plasmodium_falciparum_3D7 | gene_product=M1-family alanyl aminopeptidase | transcript_product=M1-family alanyl aminopeptidase | location=Pf3D7_13_v3:501790-505047(+) | protein_length=1085 | sequence_SO=chromosome | SO=protein_coding | is_pseudo=false	NaN	1	199.349	2.99349	2673-10uM	DMSO
2673-10uM / DMSO	_IINNEGTVLQPLK_	970	Specific	transcript=PF3D7_1021900.1	-0.432106	0.432106	6.62279e-18	3.80427e-16	45	transcript=PF3D7_1021900.1	NaN	gene=PF3D7_1021900 | organism=Plasmodium_falciparum_3D7 | gene_product=PHAX domain-containing protein, putative | transcript_product=PHAX domain-containing protein, putative | location=Pf3D7_10_v3:905473-912345(-) | protein_length=2290 | sequence_SO=chromosome | SO=protein_coding | is_pseudo=false	NaN	1	-25.8821	0.741179	2673-10uM	DMSO
2673-10uM / DMSO	_QIAENAGHEGSVVAGNILK_	483	Specific	transcript=PF3D7_1015600.1	0.672838	0.672838	7.05652e-18	4.04326e-16	81	transcript=PF3D7_1015600.1	NaN	gene=PF3D7_1015600 | organism=Plasmodium_falciparum_3D7 | gene_product=heat shock protein 60 | transcript_product=heat shock protein 60 | location=Pf3D7_10_v3:627044-629040(-) | protein_length=580 | sequence_SO=chromosome | SO=protein_coding | is_pseudo=false	NaN	1	59.4206	1.59421	2673-10uM	DMSO
2673-10uM / DMSO	_DTDVYALFLSNC[Carbamidomethyl (C)]LDSK_	340	Specific	transcript=PF3D7_1215900.1	0.949373	0.949373	7.08762e-18	4.05093e-16	45	transcript=PF3D7_1215900.1	NaN	gene=PF3D7_1215900 | organism=Plasmodium_falciparum_3D7 | gene_product=serpentine receptor, putative | transcript_product=serpentine receptor, putative | location=Pf3D7_12_v3:641552-643519(+) | protein_length=655 | sequence_SO=chromosome | SO=protein_coding | is_pseudo=false	NaN	1	93.1033	1.93103	2673-10uM	DMSO
2673-10uM / DMSO	_FLEQPVLGF_	236	Unspecific	P02730	-0.812589	0.812589	7.22072e-18	4.11671e-16	54	P02730	SLC4A1	Band 3 anion transport protein	B3AT_HUMAN	1	-43.0641	0.569359	2673-10uM	DMSO
2673-10uM / DMSO	_YYEVILVDPNHNAVR_	130	Specific	transcript=PF3D7_0415900.1	0.384681	0.384681	7.27959e-18	4.13995e-16	108	transcript=PF3D7_0415900.1	NaN	gene=PF3D7_0415900 | organism=Plasmodium_falciparum_3D7 | gene_product=60S ribosomal protein L15, putative | transcript_product=60S ribosomal protein L15, putative | location=Pf3D7_04_v3:697918-698768(-) | protein_length=205 | sequence_SO=chromosome | SO=protein_coding | is_pseudo=false	NaN	1	30.5571	1.30557	2673-10uM	DMSO
2673-1uM / DMSO	_HLPHPTIYPK_	239	Specific-N	transcript=PF3D7_1328100.1	-0.703926	0.703926	7.41118e-18	4.20433e-16	63	transcript=PF3D7_1328100.1	NaN	gene=PF3D7_1328100 | organism=Plasmodium_falciparum_3D7 | gene_product=proteasome subunit beta type-7, putative | transcript_product=proteasome subunit beta type-7, putative | location=Pf3D7_13_v3:1184208-1185020(+) | protein_length=270 | sequence_SO=chromosome | SO=protein_coding | is_pseudo=false	NaN	1	-38.6101	0.613899	2673-1uM	DMSO
2673-10uM / DMSO	_EVVEMPLLQPER_	176	Specific	transcript=PF3D7_1311500.1	-0.480749	0.480749	7.47034e-18	4.2274e-16	45	transcript=PF3D7_1311500.1	NaN	gene=PF3D7_1311500 | organism=Plasmodium_falciparum_3D7 | gene_product=26S protease regulatory subunit 7, putative | transcript_product=26S protease regulatory subunit 7, putative | location=Pf3D7_13_v3:489927-491609(-) | protein_length=420 | sequence_SO=chromosome | SO=protein_coding | is_pseudo=false	NaN	1	-28.3395	0.716605	2673-10uM	DMSO
2673-10uM / DMSO	_DDDGYDLDSFMIPAHY_	21	Specific-C	transcript=PF3D7_1012400.1	0.837205	0.837205	7.70016e-18	4.34669e-16	54	transcript=PF3D7_1012400.1	NaN	gene=PF3D7_1012400 | organism=Plasmodium_falciparum_3D7 | gene_product=hypoxanthine-guanine phosphoribosyltransferase | transcript_product=hypoxanthine-guanine phosphoribosyltransferase | location=Pf3D7_10_v3:475327-476563(-) | protein_length=231 | sequence_SO=chromosome | SO=protein_coding | is_pseudo=false	NaN	1	78.6585	1.78659	2673-10uM	DMSO
2673-10uM / DMSO	_GFNDDIPSVIHHY_	262	Unspecific	transcript=PF3D7_0310400.1	-0.860133	0.860133	7.72384e-18	4.34932e-16	36	transcript=PF3D7_0310400.1	NaN	gene=PF3D7_0310400 | organism=Plasmodium_falciparum_3D7 | gene_product=parasite-infected erythrocyte surface protein | transcript_product=parasite-infected erythrocyte surface protein | location=Pf3D7_03_v3:447500-451384(+) | protein_length=1294 | sequence_SO=chromosome | SO=protein_coding | is_pseudo=false	NaN	1	-44.9098	0.550902	2673-10uM	DMSO
2673-10uM / DMSO	_AEELTQWK_	133	Specific	transcript=PF3D7_1366500.1	0.431237	0.431237	8.15853e-18	4.58281e-16	45	transcript=PF3D7_1366500.1	NaN	gene=PF3D7_1366500 | organism=Plasmodium_falciparum_3D7 | gene_product=nucleoside diphosphate kinase | transcript_product=nucleoside diphosphate kinase | location=Pf3D7_13_v3:2661573-2662022(+) | protein_length=149 | sequence_SO=chromosome | SO=protein_coding | is_pseudo=false	NaN	1	34.8389	1.34839	2673-10uM	DMSO
2673-10uM / DMSO	_STGYTDYDLEQIILR_	335	Specific-N	transcript=PF3D7_0922200.1	-0.332848	0.332848	8.48449e-18	4.75423e-16	99	transcript=PF3D7_0922200.1	NaN	gene=PF3D7_0922200 | organism=Plasmodium_falciparum_3D7 | gene_product=S-adenosylmethionine synthetase | transcript_product=S-adenosylmethionine synthetase | location=Pf3D7_09_v3:903362-904570(+) | protein_length=402 | sequence_SO=chromosome | SO=protein_coding | is_pseudo=false	NaN	1	-20.6032	0.793968	2673-10uM	DMSO
2673-1uM / DMSO	_GILAC[Carbamidomethyl (C)]LDER_	30	Specific	transcript=PF3D7_1325000.1	0.740255	0.740255	8.78213e-18	4.90093e-16	54	transcript=PF3D7_1325000.1	NaN	gene=PF3D7_1325000 | organism=Plasmodium_falciparum_3D7 | gene_product=U6 snRNA-associated Sm-like protein LSm6, putative | transcript_product=U6 snRNA-associated Sm-like protein LSm6, putative | location=Pf3D7_13_v3:1042855-1043088(-) | protein_length=77 | sequence_SO=chromosome | SO=protein_coding | is_pseudo=false	NaN	1	67.0471	1.67047	2673-1uM	DMSO
2673-10uM / DMSO	_KDDENVLNFLVLEK_	281	Specific	transcript=PF3D7_1454400.1	1.50602	1.50602	8.78918e-18	4.90093e-16	72	transcript=PF3D7_1454400.1	NaN	gene=PF3D7_1454400 | organism=Plasmodium_falciparum_3D7 | gene_product=aminopeptidase P | transcript_product=aminopeptidase P | location=Pf3D7_14_v3:2234143-2236476(+) | protein_length=777 | sequence_SO=chromosome | SO=protein_coding | is_pseudo=false	NaN	1	184.026	2.84026	2673-10uM	DMSO
2673-1uM / DMSO	_AGEDVSIPNLNSL_	231	Unspecific	transcript=PF3D7_1029600.1	-1.0337	1.0337	8.98319e-18	4.99693e-16	36	transcript=PF3D7_1029600.1	NaN	gene=PF3D7_1029600 | organism=Plasmodium_falciparum_3D7 | gene_product=adenosine deaminase | transcript_product=adenosine deaminase | location=Pf3D7_10_v3:1206302-1207405(+) | protein_length=367 | sequence_SO=chromosome | SO=protein_coding | is_pseudo=false	NaN	1	-51.1543	0.488457	2673-1uM	DMSO
2673-10uM / DMSO	_FNGVPVNFLDNPHIDK_	417	Specific	transcript=PF3D7_1330800.1	0.285991	0.285991	9.05195e-18	5.01348e-16	99	transcript=PF3D7_1330800.1	NaN	gene=PF3D7_1330800 | organism=Plasmodium_falciparum_3D7 | gene_product=RNA-binding protein, putative | transcript_product=RNA-binding protein, putative | location=Pf3D7_13_v3:1294615-1296966(+) | protein_length=596 | sequence_SO=chromosome | SO=protein_coding | is_pseudo=false	NaN	1	21.9247	1.21925	2673-10uM	DMSO
2673-10uM / DMSO	_SDNYVDLLIK_	301	Specific	transcript=PF3D7_1354300.1	-0.757256	0.757256	9.05682e-18	5.01348e-16	45	transcript=PF3D7_1354300.1	NaN	gene=PF3D7_1354300 | organism=Plasmodium_falciparum_3D7 | gene_product=large subunit rRNA methyltransferase, putative | transcript_product=large subunit rRNA methyltransferase, putative | location=Pf3D7_13_v3:2164239-2167416(-) | protein_length=1019 | sequence_SO=chromosome | SO=protein_coding | is_pseudo=false	NaN	1	-40.8379	0.591621	2673-10uM	DMSO
2673-10uM / DMSO	_SNDVYSEVGNMVLILR_	37	Specific	transcript=PF3D7_0303000.1	1.07319	1.07319	9.10754e-18	5.02939e-16	36	transcript=PF3D7_0303000.1	NaN	gene=PF3D7_0303000 | organism=Plasmodium_falciparum_3D7 | gene_product=N-ethylmaleimide-sensitive fusion protein | transcript_product=N-ethylmaleimide-sensitive fusion protein | location=Pf3D7_03_v3:159353-161704(-) | protein_length=783 | sequence_SO=chromosome | SO=protein_coding | is_pseudo=false	NaN	1	110.408	2.10408	2673-10uM	DMSO
2673-10uM / DMSO	_FLEDSSPLSHPIRPE_	552	Unspecific	transcript=PF3D7_1311800.1	-0.862784	0.862784	9.29804e-18	5.12221e-16	54	transcript=PF3D7_1311800.1	NaN	gene=PF3D7_1311800 | organism=Plasmodium_falciparum_3D7 | gene_product=M1-family alanyl aminopeptidase | transcript_product=M1-family alanyl aminopeptidase | location=Pf3D7_13_v3:501790-505047(+) | protein_length=1085 | sequence_SO=chromosome | SO=protein_coding | is_pseudo=false	NaN	1	-45.011	0.54989	2673-10uM	DMSO
2673-1uM / DMSO	_VGLLC[Carbamidomethyl (C)]TGDGGLSHER_	169	Specific-N	transcript=PF3D7_1029600.1	0.544556	0.544556	9.4575e-18	5.19753e-16	108	transcript=PF3D7_1029600.1	NaN	gene=PF3D7_1029600 | organism=Plasmodium_falciparum_3D7 | gene_product=adenosine deaminase | transcript_product=adenosine deaminase | location=Pf3D7_10_v3:1206302-1207405(+) | protein_length=367 | sequence_SO=chromosome | SO=protein_coding | is_pseudo=false	NaN	1	45.8571	1.45857	2673-1uM	DMSO
2673-1uM / DMSO	_DMTFEQAEILALTVLR_	190	Specific	transcript=PF3D7_0727400.1	1.32771	1.32771	9.60919e-18	5.26598e-16	54	transcript=PF3D7_0727400.1	NaN	gene=PF3D7_0727400 | organism=Plasmodium_falciparum_3D7 | gene_product=proteasome subunit alpha type-5, putative | transcript_product=proteasome subunit alpha type-5, putative | location=Pf3D7_07_v3:1162710-1163831(+) | protein_length=256 | sequence_SO=chromosome | SO=protein_coding | is_pseudo=false	NaN	1	151.004	2.51004	2673-1uM	DMSO
2673-10uM / DMSO	_GVELQQPEYEPSVH_	1146	Specific-C	transcript=PF3D7_0935800.1	-0.591718	0.591718	9.62812e-18	5.26598e-16	36	transcript=PF3D7_0935800.1	NaN	gene=PF3D7_0935800 | organism=Plasmodium_falciparum_3D7 | gene_product=cytoadherence linked asexual protein 9 | transcript_product=cytoadherence linked asexual protein 9 | location=Pf3D7_09_v3:1413840-1419754(+) | protein_length=1340 | sequence_SO=chromosome | SO=protein_coding | is_pseudo=false	NaN	1	-33.6448	0.663552	2673-10uM	DMSO
2673-10uM / DMSO	_IGTPLFVPEK_	882	Specific	transcript=PF3D7_0607000.1	0.38302	0.38302	9.90706e-18	5.40561e-16	54	transcript=PF3D7_0607000.1	NaN	gene=PF3D7_0607000 | organism=Plasmodium_falciparum_3D7 | gene_product=translation initiation factor IF-2, putative | transcript_product=translation initiation factor IF-2, putative | location=Pf3D7_06_v3:293864-296797(+) | protein_length=977 | sequence_SO=chromosome | SO=protein_coding | is_pseudo=false	NaN	1	30.4069	1.30407	2673-10uM	DMSO
2673-10uM / DMSO	_AHNEFISNLPNIK_	188	Specific	transcript=PF3D7_1419300.1	0.280421	0.280421	9.99842e-18	5.44247e-16	108	transcript=PF3D7_1419300.1	NaN	gene=PF3D7_1419300 | organism=Plasmodium_falciparum_3D7 | gene_product=glutathione S-transferase | transcript_product=glutathione S-transferase | location=Pf3D7_14_v3:802717-803481(+) | protein_length=211 | sequence_SO=chromosome | SO=protein_coding | is_pseudo=false	NaN	1	21.4549	1.21455	2673-10uM	DMSO
2673-1uM / DMSO	_FSTGIQNVSK_	59	Specific	transcript=PF3D7_1439900.1	0.485576	0.485576	1.01027e-17	5.48618e-16	54	transcript=PF3D7_1439900.1	NaN	gene=PF3D7_1439900 | organism=Plasmodium_falciparum_3D7 | gene_product=triosephosphate isomerase | transcript_product=triosephosphate isomerase | location=Pf3D7_14_v3:1622576-1623612(+) | protein_length=248 | sequence_SO=chromosome | SO=protein_coding | is_pseudo=false	NaN	1	40.0145	1.40015	2673-1uM	DMSO
2673-10uM / DMSO	_SIGSAQEGAELLLQENYK_	171	Specific-N	transcript=PF3D7_0727400.1	0.981365	0.981365	1.05395e-17	5.70984e-16	54	transcript=PF3D7_0727400.1	NaN	gene=PF3D7_0727400 | organism=Plasmodium_falciparum_3D7 | gene_product=proteasome subunit alpha type-5, putative | transcript_product=proteasome subunit alpha type-5, putative | location=Pf3D7_07_v3:1162710-1163831(+) | protein_length=256 | sequence_SO=chromosome | SO=protein_coding | is_pseudo=false	NaN	1	97.4332	1.97433	2673-10uM	DMSO
2673-10uM / DMSO	_NLQYYDLSAR_	142	Specific	transcript=PF3D7_1117700.1	0.587358	0.587358	1.07217e-17	5.79479e-16	54	transcript=PF3D7_1117700.1	NaN	gene=PF3D7_1117700 | organism=Plasmodium_falciparum_3D7 | gene_product=GTP-binding nuclear protein RAN/TC4 | transcript_product=GTP-binding nuclear protein RAN/TC4 | location=Pf3D7_11_v3:670711-671515(-) | protein_length=214 | sequence_SO=chromosome | SO=protein_coding | is_pseudo=false	NaN	1	50.2492	1.50249	2673-10uM	DMSO
2673-10uM / DMSO	_MIDESEVLTIA_	102	Unspecific	transcript=PF3D7_0621200.1	-1.02448	1.02448	1.07905e-17	5.8182e-16	45	transcript=PF3D7_0621200.1	NaN	gene=PF3D7_0621200 | organism=Plasmodium_falciparum_3D7 | gene_product=pyridoxine biosynthesis protein PDX1 | transcript_product=pyridoxine biosynthesis protein PDX1 | location=Pf3D7_06_v3:871297-872202(-) | protein_length=301 | sequence_SO=chromosome | SO=protein_coding | is_pseudo=false	NaN	1	-50.8414	0.491586	2673-10uM	DMSO
2673-1uM / DMSO	_YLLEDPHADAGFK_	809	Specific	transcript=PF3D7_1311800.1	0.454257	0.454257	1.08621e-17	5.84305e-16	108	transcript=PF3D7_1311800.1	NaN	gene=PF3D7_1311800 | organism=Plasmodium_falciparum_3D7 | gene_product=M1-family alanyl aminopeptidase | transcript_product=M1-family alanyl aminopeptidase | location=Pf3D7_13_v3:501790-505047(+) | protein_length=1085 | sequence_SO=chromosome | SO=protein_coding | is_pseudo=false	NaN	1	37.0077	1.37008	2673-1uM	DMSO
2673-10uM / DMSO	_HTGFLTIGGIEER_	288	Specific	transcript=PF3D7_1408000.1	0.396683	0.396683	1.16054e-17	6.22824e-16	108	transcript=PF3D7_1408000.1	NaN	gene=PF3D7_1408000 | organism=Plasmodium_falciparum_3D7 | gene_product=plasmepsin II | transcript_product=plasmepsin II | location=Pf3D7_14_v3:293471-294832(+) | protein_length=453 | sequence_SO=chromosome | SO=protein_coding | is_pseudo=false	NaN	1	31.6478	1.31648	2673-10uM	DMSO
2673-1uM / DMSO	_IGIIGGTGLDDPEILEGR_	29;12;12	Specific	B4DUC8;J3QSB7;Q13126	0.393278	0.393278	1.18188e-17	6.32789e-16	54	B4DUC8;J3QSB7;Q13126	MTAP	S-methyl-5'-thioadenosine phosphorylase;Purine nucleoside phosphorylase;S-methyl-5'-thioadenosine phosphorylase	B4DUC8_HUMAN;J3QSB7_HUMAN;MTAP_HUMAN	1	31.3374	1.31337	2673-1uM	DMSO
2673-10uM / DMSO	_DILNYTYVFIR_	154	Specific	transcript=PF3D7_1205600.1	-0.786505	0.786505	1.18734e-17	6.3423e-16	54	transcript=PF3D7_1205600.1	NaN	gene=PF3D7_1205600 | organism=Plasmodium_falciparum_3D7 | gene_product=tetratricopeptide repeat protein, putative | transcript_product=tetratricopeptide repeat protein, putative | location=Pf3D7_12_v3:249336-251399(-) | protein_length=333 | sequence_SO=chromosome | SO=protein_coding | is_pseudo=false	NaN	1	-42.0253	0.579747	2673-10uM	DMSO
2673-10uM / DMSO	_AAHLPAEFTPAVH_	111	Unspecific	P69905	-0.476288	0.476288	1.22207e-17	6.51259e-16	90	P69905	HBA1	Hemoglobin subunit alpha	HBA_HUMAN	1	-28.1175	0.718825	2673-10uM	DMSO
2673-1uM / DMSO	_DILC[Carbamidomethyl (C)]LEDIPYKDEIK_	19	Specific	transcript=PF3D7_1216900.1	0.435623	0.435623	1.24741e-17	6.63214e-16	72	transcript=PF3D7_1216900.1	NaN	gene=PF3D7_1216900 | organism=Plasmodium_falciparum_3D7 | gene_product=DNA-binding chaperone, putative | transcript_product=DNA-binding chaperone, putative | location=Pf3D7_12_v3:670447-673266(+) | protein_length=939 | sequence_SO=chromosome | SO=protein_coding | is_pseudo=false	NaN	1	35.2494	1.35249	2673-1uM	DMSO
2673-1uM / DMSO	_MGAYLSVGK_	338	Specific	transcript=PF3D7_1446200.1	1.22812	1.22812	1.25874e-17	6.67685e-16	45	transcript=PF3D7_1446200.1	NaN	gene=PF3D7_1446200 | organism=Plasmodium_falciparum_3D7 | gene_product=M17 leucyl aminopeptidase | transcript_product=M17 leucyl aminopeptidase | location=Pf3D7_14_v3:1893200-1895017(-) | protein_length=605 | sequence_SO=chromosome | SO=protein_coding | is_pseudo=false	NaN	1	134.262	2.34262	2673-1uM	DMSO
2673-10uM / DMSO	_DAQIFIQK_	469	Specific	P04040	1.13185	1.13185	1.30198e-17	6.89027e-16	45	P04040	CAT	Catalase	CATA_HUMAN	1	119.139	2.19139	2673-10uM	DMSO
2673-1uM / DMSO	_LC[Carbamidomethyl (C)]TLDESVSLATMIDR_	253	Specific	Q9GZT8	1.57813	1.57813	1.31483e-17	6.9422e-16	36	Q9GZT8	NIF3L1	NIF3-like protein 1	NIF3L_HUMAN	1	198.583	2.98583	2673-1uM	DMSO
2673-10uM / DMSO	_IRYESITDTQKL_	45	Specific-C	transcript=PF3D7_0708400.1	-1.77621	1.77621	1.31985e-17	6.9526e-16	72	transcript=PF3D7_0708400.1	NaN	gene=PF3D7_0708400 | organism=Plasmodium_falciparum_3D7 | gene_product=heat shock protein 90 | transcript_product=heat shock protein 90 | location=Pf3D7_07_v3:381592-384614(+) | protein_length=745 | sequence_SO=chromosome | SO=protein_coding | is_pseudo=false	NaN	1	-70.8051	0.291949	2673-10uM	DMSO
2673-10uM / DMSO	_GLNEAVALLEYK_	155	Specific	transcript=PF3D7_1029600.1	0.815481	0.815481	1.32808e-17	6.9799e-16	54	transcript=PF3D7_1029600.1	NaN	gene=PF3D7_1029600 | organism=Plasmodium_falciparum_3D7 | gene_product=adenosine deaminase | transcript_product=adenosine deaminase | location=Pf3D7_10_v3:1206302-1207405(+) | protein_length=367 | sequence_SO=chromosome | SO=protein_coding | is_pseudo=false	NaN	1	75.9885	1.75989	2673-10uM	DMSO
2673-10uM / DMSO	_IDVHDLISDMIK_	48	Specific-N	transcript=PF3D7_1121600.1	0.820454	0.820454	1.39615e-17	7.32081e-16	108	transcript=PF3D7_1121600.1	NaN	gene=PF3D7_1121600 | organism=Plasmodium_falciparum_3D7 | gene_product=exported protein 1 | transcript_product=exported protein 1 | location=Pf3D7_11_v3:815386-816322(-) | protein_length=162 | sequence_SO=chromosome | SO=protein_coding | is_pseudo=false	NaN	1	76.5962	1.76596	2673-10uM	DMSO
2673-1uM / DMSO	_LAAHLPAEFTPA_	110	Unspecific	P69905	-0.574876	0.574876	1.40046e-17	7.32662e-16	54	P69905	HBA1	Hemoglobin subunit alpha	HBA_HUMAN	1	-32.8656	0.671344	2673-1uM	DMSO
2673-10uM / DMSO	_DDITVNEEILQK_	5	Specific	transcript=PF3D7_0211800.1	-0.882498	0.882498	1.45489e-17	7.59398e-16	45	transcript=PF3D7_0211800.1	NaN	gene=PF3D7_0211800 | organism=Plasmodium_falciparum_3D7 | gene_product=asparagine--tRNA ligase | transcript_product=asparagine--tRNA ligase | location=Pf3D7_02_v3:475242-477074(+) | protein_length=610 | sequence_SO=chromosome | SO=protein_coding | is_pseudo=false	NaN	1	-45.7572	0.542428	2673-10uM	DMSO
2673-10uM / DMSO	_HFDDEIQVN_	345	Unspecific	transcript=PF3D7_0520900.1	1.16847	1.16847	1.46383e-17	7.62324e-16	36	transcript=PF3D7_0520900.1	NaN	gene=PF3D7_0520900 | organism=Plasmodium_falciparum_3D7 | gene_product=adenosylhomocysteinase | transcript_product=adenosylhomocysteinase | location=Pf3D7_05_v3:857038-858477(+) | protein_length=479 | sequence_SO=chromosome | SO=protein_coding | is_pseudo=false	NaN	1	124.773	2.24773	2673-10uM	DMSO
2673-10uM / DMSO	_QVC[Carbamidomethyl (C)]PLDNTTWEFQK_	91	Specific	transcript=PF3D7_0319100.1	0.341917	0.341917	1.55184e-17	8.06323e-16	54	transcript=PF3D7_0319100.1	NaN	gene=PF3D7_0319100 | organism=Plasmodium_falciparum_3D7 | gene_product=E3 ubiquitin-protein ligase RBX1, putative | transcript_product=E3 ubiquitin-protein ligase RBX1, putative | location=Pf3D7_03_v3:802260-802583(-) | protein_length=107 | sequence_SO=chromosome | SO=protein_coding | is_pseudo=false	NaN	1	26.744	1.26744	2673-10uM	DMSO
2673-10uM / DMSO	_SLQPEPSHPY_	2128	Specific-N	P11277	0.740832	0.740832	1.56352e-17	8.10549e-16	45	P11277	SPTB	Spectrin beta chain, erythrocytic	SPTB1_HUMAN	1	67.1139	1.67114	2673-10uM	DMSO
2673-10uM / DMSO	_GYLTIGGIEDR_	289	Specific	transcript=PF3D7_1407900.1	0.544995	0.544995	1.57383e-17	8.14047e-16	54	transcript=PF3D7_1407900.1	NaN	gene=PF3D7_1407900 | organism=Plasmodium_falciparum_3D7 | gene_product=plasmepsin I | transcript_product=plasmepsin I | location=Pf3D7_14_v3:288297-289655(+) | protein_length=452 | sequence_SO=chromosome | SO=protein_coding | is_pseudo=false	NaN	1	45.9015	1.45901	2673-10uM	DMSO
2673-10uM / DMSO	_SEEVFEFGNETLVK_	174	Specific-N	transcript=PF3D7_0302900.1	-0.583993	0.583993	1.64987e-17	8.51454e-16	54	transcript=PF3D7_0302900.1	NaN	gene=PF3D7_0302900 | organism=Plasmodium_falciparum_3D7 | gene_product=exportin-1, putative | transcript_product=exportin-1, putative | location=Pf3D7_03_v3:152168-156146(-) | protein_length=1254 | sequence_SO=chromosome | SO=protein_coding | is_pseudo=false	NaN	1	-33.2885	0.667115	2673-10uM	DMSO
2673-1uM / DMSO	_IIEENIIAVFAK_	15	Specific	transcript=PF3D7_0306300.1	0.494886	0.494886	1.65788e-17	8.53661e-16	54	transcript=PF3D7_0306300.1	NaN	gene=PF3D7_0306300 | organism=Plasmodium_falciparum_3D7 | gene_product=glutaredoxin 1 | transcript_product=glutaredoxin 1 | location=Pf3D7_03_v3:295107-296094(-) | protein_length=111 | sequence_SO=chromosome | SO=protein_coding | is_pseudo=false	NaN	1	40.9209	1.40921	2673-1uM	DMSO
2673-1uM / DMSO	_YLHELLTR_	63	Specific-N	transcript=PF3D7_0803800.1	-0.634307	0.634307	1.66483e-17	8.55313e-16	45	transcript=PF3D7_0803800.1	NaN	gene=PF3D7_0803800 | organism=Plasmodium_falciparum_3D7 | gene_product=proteasome subunit beta type-4 | transcript_product=proteasome subunit beta type-4 | location=Pf3D7_08_v3:233467-234426(-) | protein_length=265 | sequence_SO=chromosome | SO=protein_coding | is_pseudo=false	NaN	1	-35.575	0.64425	2673-1uM	DMSO
2673-1uM / DMSO	_HEANQQLQFENNAEDLQR_	684	Specific-N	P02549	0.517145	0.517145	1.71451e-17	8.78089e-16	45	P02549	SPTA1	Spectrin alpha chain, erythrocytic 1	SPTA1_HUMAN	1	43.112	1.43112	2673-1uM	DMSO
2673-10uM / DMSO	_EHGIQPDGQMPSDKA_	27	Unspecific	transcript=PF3D7_0903700.1	0.703617	0.703617	1.71685e-17	8.78089e-16	54	transcript=PF3D7_0903700.1	NaN	gene=PF3D7_0903700 | organism=Plasmodium_falciparum_3D7 | gene_product=alpha tubulin 1 | transcript_product=alpha tubulin 1 | location=Pf3D7_09_v3:175542-177442(+) | protein_length=453 | sequence_SO=chromosome | SO=protein_coding | is_pseudo=false	NaN	1	62.8583	1.62858	2673-10uM	DMSO
2673-1uM / DMSO	_GGSILHGVL_	274	Unspecific	transcript=PF3D7_1410600.1	-1.08277	1.08277	1.72554e-17	8.80567e-16	36	transcript=PF3D7_1410600.1	NaN	gene=PF3D7_1410600 | organism=Plasmodium_falciparum_3D7 | gene_product=eukaryotic translation initiation factor 2 subunit gamma, putative | transcript_product=eukaryotic translation initiation factor 2 subunit gamma, putative | location=Pf3D7_14_v3:427191-428588(+) | protein_length=465 | sequence_SO=chromosome | SO=protein_coding | is_pseudo=false	NaN	1	-52.7878	0.472122	2673-1uM	DMSO
2673-1uM / DMSO	_LSLINYSNPSEK_	379	Specific	transcript=PF3D7_0922600.1	0.582254	0.582254	1.73384e-17	8.82827e-16	54	transcript=PF3D7_0922600.1	NaN	gene=PF3D7_0922600 | organism=Plasmodium_falciparum_3D7 | gene_product=glutamine synthetase, putative | transcript_product=glutamine synthetase, putative | location=Pf3D7_09_v3:916603-918674(+) | protein_length=543 | sequence_SO=chromosome | SO=protein_coding | is_pseudo=false	NaN	1	49.7186	1.49719	2673-1uM	DMSO
2673-1uM / DMSO	_LIAEVITK_	1020	Specific	transcript=PF3D7_1311800.1	0.505955	0.505955	1.74405e-17	8.86056e-16	99	transcript=PF3D7_1311800.1	NaN	gene=PF3D7_1311800 | organism=Plasmodium_falciparum_3D7 | gene_product=M1-family alanyl aminopeptidase | transcript_product=M1-family alanyl aminopeptidase | location=Pf3D7_13_v3:501790-505047(+) | protein_length=1085 | sequence_SO=chromosome | SO=protein_coding | is_pseudo=false	NaN	1	42.0063	1.42006	2673-1uM	DMSO
2673-10uM / DMSO	_TNEFLDILK_	665	Specific	transcript=PF3D7_1468900.1	-0.723203	0.723203	1.76782e-17	8.96139e-16	45	transcript=PF3D7_1468900.1	NaN	gene=PF3D7_1468900 | organism=Plasmodium_falciparum_3D7 | gene_product=zinc finger protein, putative | transcript_product=zinc finger protein, putative | location=Pf3D7_14_v3:2831928-2834369(-) | protein_length=813 | sequence_SO=chromosome | SO=protein_coding | is_pseudo=false	NaN	1	-39.4249	0.605751	2673-10uM	DMSO
2673-1uM / DMSO	_GAGAFGYFEVTHDITK_	78	Specific	P04040	1.70062	1.70062	1.83331e-17	9.27279e-16	54	P04040	CAT	Catalase	CATA_HUMAN	1	225.041	3.25041	2673-1uM	DMSO
2673-10uM / DMSO	_SIVHNVDPPAPLPLDEGK_	115	Specific	transcript=PF3D7_1244600.1	0.370543	0.370543	1.88077e-17	9.49186e-16	108	transcript=PF3D7_1244600.1	NaN	gene=PF3D7_1244600 | organism=Plasmodium_falciparum_3D7 | gene_product=ADP-ribosylation factor GTPase-activating protein | transcript_product=ADP-ribosylation factor GTPase-activating protein | location=Pf3D7_12_v3:1868533-1869531(-) | protein_length=332 | sequence_SO=chromosome | SO=protein_coding | is_pseudo=false	NaN	1	29.284	1.29284	2673-10uM	DMSO
2673-10uM / DMSO	_YVNQGGLELTGNSPEHSLFDK_	908	Specific	transcript=PF3D7_0915400.1	0.709941	0.709941	1.94918e-17	9.81545e-16	45	transcript=PF3D7_0915400.1	NaN	gene=PF3D7_0915400 | organism=Plasmodium_falciparum_3D7 | gene_product=ATP-dependent 6-phosphofructokinase | transcript_product=ATP-dependent 6-phosphofructokinase | location=Pf3D7_09_v3:650585-654841(-) | protein_length=1418 | sequence_SO=chromosome | SO=protein_coding | is_pseudo=false	NaN	1	63.5737	1.63574	2673-10uM	DMSO
2673-10uM / DMSO	_NDNC[Carbamidomethyl (C)]YLDLITSFR_	153	Specific	transcript=PF3D7_1128400.1	0.581001	0.581001	2.16378e-17	1.08721e-15	45	transcript=PF3D7_1128400.1	NaN	gene=PF3D7_1128400 | organism=Plasmodium_falciparum_3D7 | gene_product=bifunctional farnesyl/geranylgeranyl diphosphate synthase | transcript_product=bifunctional farnesyl/geranylgeranyl diphosphate synthase | location=Pf3D7_11_v3:1104216-1106505(-) | protein_length=376 | sequence_SO=chromosome | SO=protein_coding | is_pseudo=false	NaN	1	49.5887	1.49589	2673-10uM	DMSO
2673-10uM / DMSO	_FDNNFVQGIITC[Carbamidomethyl (C)]FK_	257	Specific	transcript=PF3D7_0512200.1	0.90631	0.90631	2.1768e-17	1.09136e-15	36	transcript=PF3D7_0512200.1	NaN	gene=PF3D7_0512200 | organism=Plasmodium_falciparum_3D7 | gene_product=glutathione synthetase | transcript_product=glutathione synthetase | location=Pf3D7_05_v3:529934-531901(-) | protein_length=655 | sequence_SO=chromosome | SO=protein_coding | is_pseudo=false	NaN	1	87.4246	1.87425	2673-10uM	DMSO
2673-10uM / DMSO	_KSPSDVKPLPSPDTDVPLS_	118;120;88;107;75;120;55	Specific-C	A0A087WU29;A0A0C4DFT7;E7EQF3;E9PD10;E9PH25;P02724;Q13030	0.7482	0.7482	2.24888e-17	1.12503e-15	45	A0A087WU29;A0A0C4DFT7;E7EQF3;E9PD10;E9PH25;P02724;Q13030	GYPA;GYPA;GYPA;GYPA;GYPA;GYPA;GPErik	Glycophorin;Glycophorin;Glycophorin;Glycophorin;Glycophorin-A;Glycophorin-A;Glycophorin Erik I-IV	A0A087WU29_HUMAN;A0A0C4DFT7_HUMAN;E7EQF3_HUMAN;E9PD10_HUMAN;E9PH25_HUMAN;GLPA_HUMAN;Q13030_HUMAN	1	67.9695	1.6797	2673-10uM	DMSO
2673-10uM / DMSO	_NMGTYDIIHVK_	201	Specific	transcript=PF3D7_1105400.1	0.36869	0.36869	2.3929e-17	1.19447e-15	108	transcript=PF3D7_1105400.1	NaN	gene=PF3D7_1105400 | organism=Plasmodium_falciparum_3D7 | gene_product=40S ribosomal protein S4, putative | transcript_product=40S ribosomal protein S4, putative | location=Pf3D7_11_v3:235597-237097(-) | protein_length=261 | sequence_SO=chromosome | SO=protein_coding | is_pseudo=false	NaN	1	29.118	1.29118	2673-10uM	DMSO
2673-10uM / DMSO	_RPTELLSNPQFIVDGATR_	87	Specific	P07384	0.477478	0.477478	2.43502e-17	1.2123e-15	54	P07384	CAPN1	Calpain-1 catalytic subunit	CAN1_HUMAN	1	39.2308	1.39231	2673-10uM	DMSO
2673-10uM / DMSO	_GDSIILVSSAMK_	80	Specific	transcript=PF3D7_0819900.1	0.397532	0.397532	2.43924e-17	1.2123e-15	45	transcript=PF3D7_0819900.1	NaN	gene=PF3D7_0819900 | organism=Plasmodium_falciparum_3D7 | gene_product=U6 snRNA-associated Sm-like protein LSm3, putative | transcript_product=U6 snRNA-associated Sm-like protein LSm3, putative | location=Pf3D7_08_v3:899004-899657(-) | protein_length=91 | sequence_SO=chromosome | SO=protein_coding | is_pseudo=false	NaN	1	31.7253	1.31725	2673-10uM	DMSO
2673-10uM / DMSO	_VIIHPETNYALT_	294	Unspecific	transcript=PF3D7_1311800.1	-0.73439	0.73439	2.47708e-17	1.22844e-15	45	transcript=PF3D7_1311800.1	NaN	gene=PF3D7_1311800 | organism=Plasmodium_falciparum_3D7 | gene_product=M1-family alanyl aminopeptidase | transcript_product=M1-family alanyl aminopeptidase | location=Pf3D7_13_v3:501790-505047(+) | protein_length=1085 | sequence_SO=chromosome | SO=protein_coding | is_pseudo=false	NaN	1	-39.8928	0.601072	2673-10uM	DMSO
2673-1uM / DMSO	_VEESAFNLYDAIVK_	191	Specific	transcript=PF3D7_0907700.1	0.239469	0.239469	2.57267e-17	1.27308e-15	54	transcript=PF3D7_0907700.1	NaN	gene=PF3D7_0907700 | organism=Plasmodium_falciparum_3D7 | gene_product=proteasome activator 28 subunit beta, putative | transcript_product=proteasome activator 28 subunit beta, putative | location=Pf3D7_09_v3:364069-364908(-) | protein_length=279 | sequence_SO=chromosome | SO=protein_coding | is_pseudo=false	NaN	1	18.0558	1.18056	2673-1uM	DMSO
2673-10uM / DMSO	_NMFDLIER_	275	Specific	transcript=PF3D7_1203500.1	-0.462743	0.462743	2.69561e-17	1.33104e-15	45	transcript=PF3D7_1203500.1	NaN	gene=PF3D7_1203500 | organism=Plasmodium_falciparum_3D7 | gene_product=threonylcarbamoyl-AMP synthase, putative | transcript_product=threonylcarbamoyl-AMP synthase, putative | location=Pf3D7_12_v3:182298-183968(-) | protein_length=556 | sequence_SO=chromosome | SO=protein_coding | is_pseudo=false	NaN	1	-27.4395	0.725605	2673-10uM	DMSO
2673-10uM / DMSO	_GGVRPFGIATLIAGFK_	122	Specific	transcript=PF3D7_1353900.1	2.37623	2.37623	2.71497e-17	1.33771e-15	63	transcript=PF3D7_1353900.1	NaN	gene=PF3D7_1353900 | organism=Plasmodium_falciparum_3D7 | gene_product=proteasome subunit alpha type-7, putative | transcript_product=proteasome subunit alpha type-7, putative | location=Pf3D7_13_v3:2154162-2155217(+) | protein_length=241 | sequence_SO=chromosome | SO=protein_coding | is_pseudo=false	NaN	1	419.177	5.19177	2673-10uM	DMSO
2673-1uM / DMSO	_DMTFEQAEIL_	190	Specific-C	transcript=PF3D7_0727400.1	-0.356951	0.356951	2.88913e-17	1.42046e-15	45	transcript=PF3D7_0727400.1	NaN	gene=PF3D7_0727400 | organism=Plasmodium_falciparum_3D7 | gene_product=proteasome subunit alpha type-5, putative | transcript_product=proteasome subunit alpha type-5, putative | location=Pf3D7_07_v3:1162710-1163831(+) | protein_length=256 | sequence_SO=chromosome | SO=protein_coding | is_pseudo=false	NaN	1	-21.9187	0.780813	2673-1uM	DMSO
2673-10uM / DMSO	_SNYISDFLNIPC[Carbamidomethyl (C)]SAL_	147	Unspecific	transcript=PF3D7_1216200.1	0.622056	0.622056	3.00379e-17	1.4712e-15	54	transcript=PF3D7_1216200.1	NaN	gene=PF3D7_1216200 | organism=Plasmodium_falciparum_3D7 | gene_product=glycerol-3-phosphate dehydrogenase [NAD(+)], putative | transcript_product=glycerol-3-phosphate dehydrogenase [NAD(+)], putative | location=Pf3D7_12_v3:648889-650552(+) | protein_length=367 | sequence_SO=chromosome | SO=protein_coding | is_pseudo=false	NaN	1	53.9067	1.53907	2673-10uM	DMSO
2673-1uM / DMSO	_RQELMLNEMNTMLQEPNISNNLK_	1053	Specific	transcript=PF3D7_1311800.1	1.12371	1.12371	3.00521e-17	1.4712e-15	54	transcript=PF3D7_1311800.1	NaN	gene=PF3D7_1311800 | organism=Plasmodium_falciparum_3D7 | gene_product=M1-family alanyl aminopeptidase | transcript_product=M1-family alanyl aminopeptidase | location=Pf3D7_13_v3:501790-505047(+) | protein_length=1085 | sequence_SO=chromosome | SO=protein_coding | is_pseudo=false	NaN	1	117.906	2.17906	2673-1uM	DMSO
2673-10uM / DMSO	_EHDVLTSVLNYLK_	182	Specific-N	transcript=PF3D7_0722400.1	-2.11148	2.11148	3.1224e-17	1.52531e-15	72	transcript=PF3D7_0722400.1	NaN	gene=PF3D7_0722400 | organism=Plasmodium_falciparum_3D7 | gene_product=Obg-like ATPase 1, putative | transcript_product=Obg-like ATPase 1, putative | location=Pf3D7_07_v3:954784-956343(+) | protein_length=393 | sequence_SO=chromosome | SO=protein_coding | is_pseudo=false	NaN	1	-76.8591	0.231409	2673-10uM	DMSO
2673-10uM / DMSO	_SFGAPEQQPSALEHSIQYSGEVR_	408	Specific-N	P04040	0.789513	0.789513	3.30988e-17	1.61344e-15	45	P04040	CAT	Catalase	CATA_HUMAN	1	72.849	1.72849	2673-10uM	DMSO
2673-10uM / DMSO	_VLGVNIASLNK_	67	Specific	transcript=PF3D7_1361900.1	0.740084	0.740084	3.47392e-17	1.6898e-15	45	transcript=PF3D7_1361900.1	NaN	gene=PF3D7_1361900 | organism=Plasmodium_falciparum_3D7 | gene_product=proliferating cell nuclear antigen 1 | transcript_product=proliferating cell nuclear antigen 1 | location=Pf3D7_13_v3:2482472-2483296(-) | protein_length=274 | sequence_SO=chromosome | SO=protein_coding | is_pseudo=false	NaN	1	67.0274	1.67027	2673-10uM	DMSO
2673-10uM / DMSO	_FGGSNEAYC[Carbamidomethyl (C)]FVR_	51	Specific	transcript=PF3D7_1229400.1	1.27972	1.27972	3.57571e-17	1.73562e-15	45	transcript=PF3D7_1229400.1	NaN	gene=PF3D7_1229400 | organism=Plasmodium_falciparum_3D7 | gene_product=macrophage migration inhibitory factor | transcript_product=macrophage migration inhibitory factor | location=Pf3D7_12_v3:1208912-1209542(+) | protein_length=116 | sequence_SO=chromosome | SO=protein_coding | is_pseudo=false	NaN	1	142.791	2.42791	2673-10uM	DMSO
2673-10uM / DMSO	_LQWALEC[Carbamidomethyl (C)]LK_	422	Specific	transcript=PF3D7_1311800.1	0.524613	0.524613	3.76183e-17	1.8221e-15	54	transcript=PF3D7_1311800.1	NaN	gene=PF3D7_1311800 | organism=Plasmodium_falciparum_3D7 | gene_product=M1-family alanyl aminopeptidase | transcript_product=M1-family alanyl aminopeptidase | location=Pf3D7_13_v3:501790-505047(+) | protein_length=1085 | sequence_SO=chromosome | SO=protein_coding | is_pseudo=false	NaN	1	43.8548	1.43855	2673-10uM	DMSO
2673-1uM / DMSO	_NMVLSNEPGYYMK_	670	Specific	transcript=PF3D7_1454400.1	1.01647	1.01647	3.87262e-17	1.87179e-15	54	transcript=PF3D7_1454400.1	NaN	gene=PF3D7_1454400 | organism=Plasmodium_falciparum_3D7 | gene_product=aminopeptidase P | transcript_product=aminopeptidase P | location=Pf3D7_14_v3:2234143-2236476(+) | protein_length=777 | sequence_SO=chromosome | SO=protein_coding | is_pseudo=false	NaN	1	102.297	2.02297	2673-1uM	DMSO
2673-10uM / DMSO	_VTSVVVDVVPR_	340;340	Specific	C9JIF9;P13798	1.10794	1.10794	4.15007e-17	2.00167e-15	36	C9JIF9;P13798	APEH	Acylamino-acid-releasing enzyme	C9JIF9_HUMAN;ACPH_HUMAN	1	115.537	2.15537	2673-10uM	DMSO
2673-10uM / DMSO	_FATLSELHC[Carbamidomethyl (C)]DK_	86	Specific-N	P68871	0.740792	0.740792	4.24634e-17	2.04378e-15	54	P68871	HBB	Hemoglobin subunit beta	HBB_HUMAN	1	67.1094	1.67109	2673-10uM	DMSO
2673-1uM / DMSO	_FEALKEPLATR_	775	Specific	P02549	0.557327	0.557327	4.47934e-17	2.1514e-15	81	P02549	SPTA1	Spectrin alpha chain, erythrocytic 1	SPTA1_HUMAN	1	47.154	1.47154	2673-1uM	DMSO
2673-10uM / DMSO	_DLDHC[Carbamidomethyl (C)]C[Carbamidomethyl (C)]LVNDEGKK_	211	Specific	transcript=PF3D7_1012400.1	0.923237	0.923237	4.60064e-17	2.20503e-15	72	transcript=PF3D7_1012400.1	NaN	gene=PF3D7_1012400 | organism=Plasmodium_falciparum_3D7 | gene_product=hypoxanthine-guanine phosphoribosyltransferase | transcript_product=hypoxanthine-guanine phosphoribosyltransferase | location=Pf3D7_10_v3:475327-476563(-) | protein_length=231 | sequence_SO=chromosome | SO=protein_coding | is_pseudo=false	NaN	1	89.6366	1.89637	2673-10uM	DMSO
2673-10uM / DMSO	_LVDDQMVLSLVDEK_	86	Specific	transcript=PF3D7_1008900.1	-0.874782	0.874782	4.6665e-17	2.23191e-15	81	transcript=PF3D7_1008900.1	NaN	gene=PF3D7_1008900 | organism=Plasmodium_falciparum_3D7 | gene_product=adenylate kinase | transcript_product=adenylate kinase | location=Pf3D7_10_v3:369199-370225(-) | protein_length=242 | sequence_SO=chromosome | SO=protein_coding | is_pseudo=false	NaN	1	-45.4664	0.545336	2673-10uM	DMSO
2673-10uM / DMSO	_IMTQPINQIFR_	11	Specific	transcript=PF3D7_1350200.1	0.319298	0.319298	4.67697e-17	2.23225e-15	54	transcript=PF3D7_1350200.1	NaN	gene=PF3D7_1350200 | organism=Plasmodium_falciparum_3D7 | gene_product=small nuclear ribonucleoprotein E, putative | transcript_product=small nuclear ribonucleoprotein E, putative | location=Pf3D7_13_v3:2009477-2010281(-) | protein_length=93 | sequence_SO=chromosome | SO=protein_coding | is_pseudo=false	NaN	1	24.7723	1.24772	2673-10uM	DMSO
2673-10uM / DMSO	_VELQELVMDEK_	59	Specific-N	P02730	-0.681823	0.681823	4.99139e-17	2.37736e-15	54	P02730	SLC4A1	Band 3 anion transport protein	B3AT_HUMAN	1	-37.6623	0.623377	2673-10uM	DMSO
2673-10uM / DMSO	_ALDGNHVSLVSL_	39	Unspecific	transcript=PF3D7_1361900.1	-0.495655	0.495655	5.031e-17	2.38661e-15	36	transcript=PF3D7_1361900.1	NaN	gene=PF3D7_1361900 | organism=Plasmodium_falciparum_3D7 | gene_product=proliferating cell nuclear antigen 1 | transcript_product=proliferating cell nuclear antigen 1 | location=Pf3D7_13_v3:2482472-2483296(-) | protein_length=274 | sequence_SO=chromosome | SO=protein_coding | is_pseudo=false	NaN	1	-29.076	0.70924	2673-10uM	DMSO
2673-1uM / DMSO	_KLPADVAEELATTAQK_	13	Specific	transcript=PF3D7_1444800.1	0.618461	0.618461	5.03169e-17	2.38661e-15	99	transcript=PF3D7_1444800.1	NaN	gene=PF3D7_1444800 | organism=Plasmodium_falciparum_3D7 | gene_product=fructose-bisphosphate aldolase | transcript_product=fructose-bisphosphate aldolase | location=Pf3D7_14_v3:1844041-1845617(-) | protein_length=369 | sequence_SO=chromosome | SO=protein_coding | is_pseudo=false	NaN	1	53.5236	1.53524	2673-1uM	DMSO
2673-10uM / DMSO	_LVFLGEQAVGK_	14	Specific	transcript=PF3D7_1144900.1	0.526944	0.526944	5.06455e-17	2.39722e-15	54	transcript=PF3D7_1144900.1	NaN	gene=PF3D7_1144900 | organism=Plasmodium_falciparum_3D7 | gene_product=ras-related protein Rab-6 | transcript_product=ras-related protein Rab-6 | location=Pf3D7_11_v3:1777525-1778928(-) | protein_length=207 | sequence_SO=chromosome | SO=protein_coding | is_pseudo=false	NaN	1	44.0874	1.44087	2673-10uM	DMSO
2673-10uM / DMSO	_FMVNVLQSAC[Carbamidomethyl (C)]SK_	337	Specific	transcript=PF3D7_0624000.1	0.486519	0.486519	5.09656e-17	2.40739e-15	54	transcript=PF3D7_0624000.1	NaN	gene=PF3D7_0624000 | organism=Plasmodium_falciparum_3D7 | gene_product=hexokinase | transcript_product=hexokinase | location=Pf3D7_06_v3:981066-982547(+) | protein_length=493 | sequence_SO=chromosome | SO=protein_coding | is_pseudo=false	NaN	1	40.1061	1.40106	2673-10uM	DMSO
2673-1uM / DMSO	_SFDVNKPGEDIETLQGGVAGGSILHGVLK_	255	Specific	transcript=PF3D7_1410600.1	1.29753	1.29753	5.16802e-17	2.43611e-15	54	transcript=PF3D7_1410600.1	NaN	gene=PF3D7_1410600 | organism=Plasmodium_falciparum_3D7 | gene_product=eukaryotic translation initiation factor 2 subunit gamma, putative | transcript_product=eukaryotic translation initiation factor 2 subunit gamma, putative | location=Pf3D7_14_v3:427191-428588(+) | protein_length=465 | sequence_SO=chromosome | SO=protein_coding | is_pseudo=false	NaN	1	145.808	2.45808	2673-1uM	DMSO
2673-10uM / DMSO	_AINDPFM[Oxidation (M)]DLNHL_	32	Unspecific	transcript=PF3D7_1462800.1	-0.539945	0.539945	5.19614e-17	2.44432e-15	54	transcript=PF3D7_1462800.1	NaN	gene=PF3D7_1462800 | organism=Plasmodium_falciparum_3D7 | gene_product=glyceraldehyde-3-phosphate dehydrogenase | transcript_product=glyceraldehyde-3-phosphate dehydrogenase | location=Pf3D7_14_v3:2559098-2560347(+) | protein_length=337 | sequence_SO=chromosome | SO=protein_coding | is_pseudo=false	NaN	1	-31.2203	0.687797	2673-10uM	DMSO
2673-10uM / DMSO	_FLQNPVEIFIDDEAK_	273	Specific	transcript=PF3D7_0209800.1	-0.655364	0.655364	5.33087e-17	2.50255e-15	108	transcript=PF3D7_0209800.1	NaN	gene=PF3D7_0209800 | organism=Plasmodium_falciparum_3D7 | gene_product=ATP-dependent RNA helicase UAP56 | transcript_product=ATP-dependent RNA helicase UAP56 | location=Pf3D7_02_v3:404281-406355(-) | protein_length=457 | sequence_SO=chromosome | SO=protein_coding | is_pseudo=false	NaN	1	-36.5085	0.634915	2673-10uM	DMSO
2673-10uM / DMSO	_NDHIIHLVVR_	70	Specific-N	transcript=PF3D7_0922100.1	-0.679342	0.679342	5.61351e-17	2.62984e-15	72	transcript=PF3D7_0922100.1	NaN	gene=PF3D7_0922100 | organism=Plasmodium_falciparum_3D7 | gene_product=ubiquitin-like protein, putative | transcript_product=ubiquitin-like protein, putative | location=Pf3D7_09_v3:895415-900304(+) | protein_length=1542 | sequence_SO=chromosome | SO=protein_coding | is_pseudo=false	NaN	1	-37.555	0.62445	2673-10uM	DMSO
2673-10uM / DMSO	_ALQENGVLLEGALLKPN_	223	Specific-C	transcript=PF3D7_1444800.1	0.843392	0.843392	5.64211e-17	2.63245e-15	54	transcript=PF3D7_1444800.1	NaN	gene=PF3D7_1444800 | organism=Plasmodium_falciparum_3D7 | gene_product=fructose-bisphosphate aldolase | transcript_product=fructose-bisphosphate aldolase | location=Pf3D7_14_v3:1844041-1845617(-) | protein_length=369 | sequence_SO=chromosome | SO=protein_coding | is_pseudo=false	NaN	1	79.4263	1.79426	2673-10uM	DMSO
2673-10uM / DMSO	_C[Carbamidomethyl (C)]LLLGGSIGDR_	44	Specific	transcript=PF3D7_1470900.1	0.804784	0.804784	5.63523e-17	2.63245e-15	36	transcript=PF3D7_1470900.1	NaN	gene=PF3D7_1470900 | organism=Plasmodium_falciparum_3D7 | gene_product=proteasome subunit beta type-2, putative | transcript_product=proteasome subunit beta type-2, putative | location=Pf3D7_14_v3:2897916-2898657(+) | protein_length=195 | sequence_SO=chromosome | SO=protein_coding | is_pseudo=false	NaN	1	74.6884	1.74688	2673-10uM	DMSO
2673-10uM / DMSO	_IPVHMNENNLNNIYITK_	1274	Specific	transcript=PF3D7_0606700.1	0.476146	0.476146	5.79733e-17	2.69936e-15	45	transcript=PF3D7_0606700.1	NaN	gene=PF3D7_0606700 | organism=Plasmodium_falciparum_3D7 | gene_product=coatomer alpha subunit, putative | transcript_product=coatomer alpha subunit, putative | location=Pf3D7_06_v3:282049-287017(+) | protein_length=1512 | sequence_SO=chromosome | SO=protein_coding | is_pseudo=false	NaN	1	39.1022	1.39102	2673-10uM	DMSO
2673-10uM / DMSO	_YYLNMDEPAPVDYIAK_	94	Specific	transcript=PF3D7_1353900.1	0.987659	0.987659	5.83982e-17	2.71362e-15	54	transcript=PF3D7_1353900.1	NaN	gene=PF3D7_1353900 | organism=Plasmodium_falciparum_3D7 | gene_product=proteasome subunit alpha type-7, putative | transcript_product=proteasome subunit alpha type-7, putative | location=Pf3D7_13_v3:2154162-2155217(+) | protein_length=241 | sequence_SO=chromosome | SO=protein_coding | is_pseudo=false	NaN	1	98.2964	1.98296	2673-10uM	DMSO
2673-10uM / DMSO	_ATPTLFNSGTPRPQ_	240	Unspecific	transcript=PF3D7_1437200.1	-0.571744	0.571744	5.85231e-17	2.71391e-15	45	transcript=PF3D7_1437200.1	NaN	gene=PF3D7_1437200 | organism=Plasmodium_falciparum_3D7 | gene_product=ribonucleoside-diphosphate reductase large subunit, putative | transcript_product=ribonucleoside-diphosphate reductase large subunit, putative | location=Pf3D7_14_v3:1507359-1510089(-) | protein_length=847 | sequence_SO=chromosome | SO=protein_coding | is_pseudo=false	NaN	1	-32.7197	0.672803	2673-10uM	DMSO
2673-10uM / DMSO	_LTPLSEDVISR_	22	Specific	transcript=PF3D7_1410600.1	0.37511	0.37511	6.00606e-17	2.77957e-15	54	transcript=PF3D7_1410600.1	NaN	gene=PF3D7_1410600 | organism=Plasmodium_falciparum_3D7 | gene_product=eukaryotic translation initiation factor 2 subunit gamma, putative | transcript_product=eukaryotic translation initiation factor 2 subunit gamma, putative | location=Pf3D7_14_v3:427191-428588(+) | protein_length=465 | sequence_SO=chromosome | SO=protein_coding | is_pseudo=false	NaN	1	29.6938	1.29694	2673-10uM	DMSO
2673-10uM / DMSO	_GDGGTEGHSPSGILEK_	204	Specific-N	P02730	-0.918626	0.918626	6.04377e-17	2.79137e-15	63	P02730	SLC4A1	Band 3 anion transport protein	B3AT_HUMAN	1	-47.0988	0.529012	2673-10uM	DMSO
2673-10uM / DMSO	_ASMGSFISSQNVEK_	80	Specific	transcript=PF3D7_1011400.1	1.67352	1.67352	6.06806e-17	2.79694e-15	36	transcript=PF3D7_1011400.1	NaN	gene=PF3D7_1011400 | organism=Plasmodium_falciparum_3D7 | gene_product=proteasome subunit beta type-5 | transcript_product=proteasome subunit beta type-5 | location=Pf3D7_10_v3:441140-441955(-) | protein_length=271 | sequence_SO=chromosome | SO=protein_coding | is_pseudo=false	NaN	1	218.991	3.18991	2673-10uM	DMSO
2673-10uM / DMSO	_DYVVVSGLK_	42	Specific	transcript=PF3D7_1474800.1	0.824975	0.824975	6.08458e-17	2.7989e-15	36	transcript=PF3D7_1474800.1	NaN	gene=PF3D7_1474800 | organism=Plasmodium_falciparum_3D7 | gene_product=proteasome subunit alpha type-1, putative | transcript_product=proteasome subunit alpha type-1, putative | location=Pf3D7_14_v3:3067562-3068692(+) | protein_length=254 | sequence_SO=chromosome | SO=protein_coding | is_pseudo=false	NaN	1	77.1504	1.7715	2673-10uM	DMSO
2673-10uM / DMSO	_IIYNNNFDDVNK_	269	Specific	transcript=PF3D7_1454400.1	0.651246	0.651246	6.47441e-17	2.97225e-15	45	transcript=PF3D7_1454400.1	NaN	gene=PF3D7_1454400 | organism=Plasmodium_falciparum_3D7 | gene_product=aminopeptidase P | transcript_product=aminopeptidase P | location=Pf3D7_14_v3:2234143-2236476(+) | protein_length=777 | sequence_SO=chromosome | SO=protein_coding | is_pseudo=false	NaN	1	57.0524	1.57052	2673-10uM	DMSO
2673-10uM / DMSO	_LFDIGEGISEVEITK_	38	Specific	transcript=PF3D7_0303700.1	0.818901	0.818901	6.51901e-17	2.98673e-15	54	transcript=PF3D7_0303700.1	NaN	gene=PF3D7_0303700 | organism=Plasmodium_falciparum_3D7 | gene_product=lipoamide acyltransferase component of branched-chain alpha-keto acid dehydrogenase complex | transcript_product=lipoamide acyltransferase component of branched-chain alpha-keto acid dehydrogenase complex | location=Pf3D7_03_v3:191245-192591(-) | protein_length=448 | sequence_SO=chromosome | SO=protein_coding | is_pseudo=false	NaN	1	76.4061	1.76406	2673-10uM	DMSO
2673-10uM / DMSO	_NSVIGDTVGDPLK_	666	Specific	transcript=PF3D7_1456800.1	0.399307	0.399307	6.75971e-17	3.09081e-15	36	transcript=PF3D7_1456800.1	NaN	gene=PF3D7_1456800 | organism=Plasmodium_falciparum_3D7 | gene_product=V-type H(+)-translocating pyrophosphatase, putative | transcript_product=V-type H(+)-translocating pyrophosphatase, putative | location=Pf3D7_14_v3:2329933-2332086(-) | protein_length=717 | sequence_SO=chromosome | SO=protein_coding | is_pseudo=false	NaN	1	31.8874	1.31887	2673-10uM	DMSO
2673-10uM / DMSO	_IKEEDGNIEEAANIL_	157	Specific-C	transcript=PF3D7_1017900.1	-1.14851	1.14851	6.81668e-17	3.09827e-15	45	transcript=PF3D7_1017900.1	NaN	gene=PF3D7_1017900 | organism=Plasmodium_falciparum_3D7 | gene_product=26S proteasome regulatory subunit p55, putative | transcript_product=26S proteasome regulatory subunit p55, putative | location=Pf3D7_10_v3:715878-717437(+) | protein_length=467 | sequence_SO=chromosome | SO=protein_coding | is_pseudo=false	NaN	1	-54.891	0.45109	2673-10uM	DMSO
2673-10uM / DMSO	_LTNAEEWIHGEFK_	47	Specific	transcript=PF3D7_1126900.1	0.46507	0.46507	6.79074e-17	3.09827e-15	90	transcript=PF3D7_1126900.1	NaN	gene=PF3D7_1126900 | organism=Plasmodium_falciparum_3D7 | gene_product=small nuclear ribonucleoprotein F, putative | transcript_product=small nuclear ribonucleoprotein F, putative | location=Pf3D7_11_v3:1053642-1054333(-) | protein_length=86 | sequence_SO=chromosome | SO=protein_coding | is_pseudo=false	NaN	1	38.0384	1.38038	2673-10uM	DMSO
2673-1uM / DMSO	_LLVVPAEVGGFEGAFSK_	113;113	Specific-N	transcript=PF3D7_1357000.1;transcript=PF3D7_1357100.1	0.432689	0.432689	6.81114e-17	3.09827e-15	54	transcript=PF3D7_1357000.1;transcript=PF3D7_1357100.1	NaN	gene=PF3D7_1357000 | organism=Plasmodium_falciparum_3D7 | gene_product=elongation factor 1-alpha | transcript_product=elongation factor 1-alpha | location=Pf3D7_13_v3:2265817-2267148(-) | protein_length=443 | sequence_SO=chromosome | SO=protein_coding | is_pseudo=false;gene=PF3D7_1357100 | organism=Plasmodium_falciparum_3D7 | gene_product=elongation factor 1-alpha | transcript_product=elongation …	NaN	1	34.9747	1.34975	2673-1uM	DMSO
2673-10uM / DMSO	_QILENFNEQQIYR_	563	Specific	transcript=PF3D7_1453800.1	0.567311	0.567311	6.96266e-17	3.15834e-15	54	transcript=PF3D7_1453800.1	NaN	gene=PF3D7_1453800 | organism=Plasmodium_falciparum_3D7 | gene_product=glucose-6-phosphate dehydrogenase-6-phosphogluconolactonase | transcript_product=glucose-6-phosphate dehydrogenase-6-phosphogluconolactonase | location=Pf3D7_14_v3:2209792-2212524(-) | protein_length=910 | sequence_SO=chromosome | SO=protein_coding | is_pseudo=false	NaN	1	48.1759	1.48176	2673-10uM	DMSO
2673-10uM / DMSO	_NYAIGSDIPEK_	327	Specific	transcript=PF3D7_0207600.1	-0.877068	0.877068	7.10099e-17	3.21471e-15	45	transcript=PF3D7_0207600.1	NaN	gene=PF3D7_0207600 | organism=Plasmodium_falciparum_3D7 | gene_product=serine repeat antigen 5 | transcript_product=serine repeat antigen 5 | location=Pf3D7_02_v3:303593-307027(-) | protein_length=997 | sequence_SO=chromosome | SO=protein_coding | is_pseudo=false	NaN	1	-45.5527	0.544473	2673-10uM	DMSO
2673-10uM / DMSO	_SEQELVDC[Carbamidomethyl (C)]SVK_	317	Specific-N	transcript=PF3D7_1115400.1	-0.453523	0.453523	7.20971e-17	3.25748e-15	54	transcript=PF3D7_1115400.1	NaN	gene=PF3D7_1115400 | organism=Plasmodium_falciparum_3D7 | gene_product=cysteine proteinase falcipain 3 | transcript_product=cysteine proteinase falcipain 3 | location=Pf3D7_11_v3:584328-585806(-) | protein_length=492 | sequence_SO=chromosome | SO=protein_coding | is_pseudo=false	NaN	1	-26.9742	0.730258	2673-10uM	DMSO
2673-10uM / DMSO	_LSFPQEK_	56	Specific	transcript=PF3D7_1474800.1	1.21462	1.21462	7.43218e-17	3.35137e-15	27	transcript=PF3D7_1474800.1	NaN	gene=PF3D7_1474800 | organism=Plasmodium_falciparum_3D7 | gene_product=proteasome subunit alpha type-1, putative | transcript_product=proteasome subunit alpha type-1, putative | location=Pf3D7_14_v3:3067562-3068692(+) | protein_length=254 | sequence_SO=chromosome | SO=protein_coding | is_pseudo=false	NaN	1	132.08	2.3208	2673-10uM	DMSO
2673-10uM / DMSO	_KEIFTFPIEER_	809	Specific	transcript=PF3D7_1034900.1	0.244775	0.244775	7.50233e-17	3.37634e-15	108	transcript=PF3D7_1034900.1	NaN	gene=PF3D7_1034900 | organism=Plasmodium_falciparum_3D7 | gene_product=methionine--tRNA ligase | transcript_product=methionine--tRNA ligase | location=Pf3D7_10_v3:1383450-1386119(+) | protein_length=889 | sequence_SO=chromosome | SO=protein_coding | is_pseudo=false	NaN	1	18.4908	1.18491	2673-10uM	DMSO
2673-1uM / DMSO	_NTNFNLGDDINFVK_	190	Specific	transcript=PF3D7_0518300.1	0.617647	0.617647	7.85546e-17	3.52832e-15	54	transcript=PF3D7_0518300.1	NaN	gene=PF3D7_0518300 | organism=Plasmodium_falciparum_3D7 | gene_product=proteasome subunit beta type-1, putative | transcript_product=proteasome subunit beta type-1, putative | location=Pf3D7_05_v3:759831-760998(-) | protein_length=240 | sequence_SO=chromosome | SO=protein_coding | is_pseudo=false	NaN	1	53.437	1.53437	2673-1uM	DMSO
2673-10uM / DMSO	_YNQFSLATQVVK_	509	Specific	transcript=PF3D7_0320300.1	0.575261	0.575261	7.91664e-17	3.54883e-15	54	transcript=PF3D7_0320300.1	NaN	gene=PF3D7_0320300 | organism=Plasmodium_falciparum_3D7 | gene_product=T-complex protein 1 subunit epsilon | transcript_product=T-complex protein 1 subunit epsilon | location=Pf3D7_03_v3:845713-847320(+) | protein_length=535 | sequence_SO=chromosome | SO=protein_coding | is_pseudo=false	NaN	1	48.9947	1.48995	2673-10uM	DMSO
2673-1uM / DMSO	_DAEVFSLLSTVFK_	974	Specific	transcript=PF3D7_0302900.1	0.588414	0.588414	8.09546e-17	3.62189e-15	54	transcript=PF3D7_0302900.1	NaN	gene=PF3D7_0302900 | organism=Plasmodium_falciparum_3D7 | gene_product=exportin-1, putative | transcript_product=exportin-1, putative | location=Pf3D7_03_v3:152168-156146(-) | protein_length=1254 | sequence_SO=chromosome | SO=protein_coding | is_pseudo=false	NaN	1	50.3593	1.50359	2673-1uM	DMSO
2673-10uM / DMSO	_SLVLPPTDAPSEQALLS_	318	Unspecific	P02730	-0.607358	0.607358	8.22187e-17	3.67126e-15	36	P02730	SLC4A1	Band 3 anion transport protein	B3AT_HUMAN	1	-34.3602	0.656398	2673-10uM	DMSO
2673-10uM / DMSO	_TPEEIVNSR_	129	Specific-N	transcript=PF3D7_0814200.1	0.570738	0.570738	8.54786e-17	3.80938e-15	36	transcript=PF3D7_0814200.1	NaN	gene=PF3D7_0814200 | organism=Plasmodium_falciparum_3D7 | gene_product=DNA/RNA-binding protein Alba 1 | transcript_product=DNA/RNA-binding protein Alba 1 | location=Pf3D7_08_v3:687340-688086(+) | protein_length=248 | sequence_SO=chromosome | SO=protein_coding | is_pseudo=false	NaN	1	48.5283	1.48528	2673-10uM	DMSO
2673-10uM / DMSO	_GANESVVISSK_	83	Specific-N	transcript=PF3D7_1361900.1	0.839688	0.839688	8.63953e-17	3.84274e-15	54	transcript=PF3D7_1361900.1	NaN	gene=PF3D7_1361900 | organism=Plasmodium_falciparum_3D7 | gene_product=proliferating cell nuclear antigen 1 | transcript_product=proliferating cell nuclear antigen 1 | location=Pf3D7_13_v3:2482472-2483296(-) | protein_length=274 | sequence_SO=chromosome | SO=protein_coding | is_pseudo=false	NaN	1	78.9663	1.78966	2673-10uM	DMSO
2673-10uM / DMSO	_ILLVGAGGIGSEFLK_	22	Specific	transcript=PF3D7_1237000.1	0.379628	0.379628	8.71776e-17	3.87001e-15	54	transcript=PF3D7_1237000.1	NaN	gene=PF3D7_1237000 | organism=Plasmodium_falciparum_3D7 | gene_product=SUMO-activating enzyme subunit 2 | transcript_product=SUMO-activating enzyme subunit 2 | location=Pf3D7_12_v3:1538138-1540408(+) | protein_length=686 | sequence_SO=chromosome | SO=protein_coding | is_pseudo=false	NaN	1	30.1007	1.30101	2673-10uM	DMSO
2673-10uM / DMSO	_SHAGELEAL_	162	Unspecific	P02730	-1.24304	1.24304	8.76092e-17	3.88163e-15	54	P02730	SLC4A1	Band 3 anion transport protein	B3AT_HUMAN	1	-57.7519	0.422481	2673-10uM	DMSO
2673-10uM / DMSO	_KEC[Carbamidomethyl (C)]FNLILNC[Carbamidomethyl (C)]VK_	234	Specific	transcript=PF3D7_0931800.1	0.351615	0.351615	9.40614e-17	4.15944e-15	108	transcript=PF3D7_0931800.1	NaN	gene=PF3D7_0931800 | organism=Plasmodium_falciparum_3D7 | gene_product=proteasome subunit beta type-6, putative | transcript_product=proteasome subunit beta type-6, putative | location=Pf3D7_09_v3:1273082-1273930(-) | protein_length=282 | sequence_SO=chromosome | SO=protein_coding | is_pseudo=false	NaN	1	27.5988	1.27599	2673-10uM	DMSO
2673-10uM / DMSO	_AEHVDIPVEAQ_	33	Unspecific	transcript=PF3D7_1113400.1	-0.562355	0.562355	9.8245e-17	4.33606e-15	45	transcript=PF3D7_1113400.1	NaN	gene=PF3D7_1113400 | organism=Plasmodium_falciparum_3D7 | gene_product=ubiquitin domain-containing protein DSK2, putative | transcript_product=ubiquitin domain-containing protein DSK2, putative | location=Pf3D7_11_v3:521122-522824(-) | protein_length=388 | sequence_SO=chromosome | SO=protein_coding | is_pseudo=false	NaN	1	-32.2804	0.677196	2673-10uM	DMSO
2673-10uM / DMSO	_LEDIQELKPT_	322	Unspecific	transcript=PF3D7_0525100.1	0.641322	0.641322	9.91978e-17	4.36967e-15	45	transcript=PF3D7_0525100.1	NaN	gene=PF3D7_0525100 | organism=Plasmodium_falciparum_3D7 | gene_product=acyl-CoA synthetase | transcript_product=acyl-CoA synthetase | location=Pf3D7_05_v3:1041745-1043766(+) | protein_length=673 | sequence_SO=chromosome | SO=protein_coding | is_pseudo=false	NaN	1	55.9757	1.55976	2673-10uM	DMSO
2673-10uM / DMSO	_VALEDIIQELNR_	1579;1566	Specific-N	transcript=PF3D7_1128000.1;transcript=PF3D7_1128000.2	-1.09209	1.09209	1.00352e-16	4.41203e-15	36	transcript=PF3D7_1128000.1;transcript=PF3D7_1128000.2	NaN	gene=PF3D7_1128000 | organism=Plasmodium_falciparum_3D7 | gene_product=conserved Plasmodium protein, unknown function | transcript_product=conserved Plasmodium protein, unknown function | location=Pf3D7_11_v3:1087314-1093105(+) | protein_length=1789 | sequence_SO=chromosome | SO=protein_coding | is_pseudo=false;gene=PF3D7_1128000 | organism=Plasmodium_falciparum_3D7 | gene_product=conserved Plasm…	NaN	1	-53.0919	0.469081	2673-10uM	DMSO
2673-10uM / DMSO	_GAGAFGYFEVTHDITK_	78	Specific	P04040	1.93308	1.93308	1.01352e-16	4.44745e-15	54	P04040	CAT	Catalase	CATA_HUMAN	1	281.869	3.81869	2673-10uM	DMSO
2673-1uM / DMSO	_ITFFIDRPDMMAK_	326	Specific	transcript=PF3D7_1311800.1	0.488263	0.488263	1.03402e-16	4.52868e-15	99	transcript=PF3D7_1311800.1	NaN	gene=PF3D7_1311800 | organism=Plasmodium_falciparum_3D7 | gene_product=M1-family alanyl aminopeptidase | transcript_product=M1-family alanyl aminopeptidase | location=Pf3D7_13_v3:501790-505047(+) | protein_length=1085 | sequence_SO=chromosome | SO=protein_coding | is_pseudo=false	NaN	1	40.2755	1.40275	2673-1uM	DMSO
2673-10uM / DMSO	_LSSELIELLEK_	1207	Specific	transcript=PF3D7_1219100.1	-1.00103	1.00103	1.08153e-16	4.7277e-15	54	transcript=PF3D7_1219100.1	NaN	gene=PF3D7_1219100 | organism=Plasmodium_falciparum_3D7 | gene_product=clathrin heavy chain, putative | transcript_product=clathrin heavy chain, putative | location=Pf3D7_12_v3:757649-763642(+) | protein_length=1997 | sequence_SO=chromosome | SO=protein_coding | is_pseudo=false	NaN	1	-50.0357	0.499643	2673-10uM	DMSO
2673-10uM / DMSO	_GDIIQDQTDDAIFR_	125	Specific	transcript=PF3D7_1448600.1	-0.682215	0.682215	1.13188e-16	4.93835e-15	45	transcript=PF3D7_1448600.1	NaN	gene=PF3D7_1448600 | organism=Plasmodium_falciparum_3D7 | gene_product=SNARE protein, putative | transcript_product=SNARE protein, putative | location=Pf3D7_14_v3:1997542-1998303(-) | protein_length=253 | sequence_SO=chromosome | SO=protein_coding | is_pseudo=false	NaN	1	-37.6792	0.623208	2673-10uM	DMSO
2673-10uM / DMSO	_SLTDYDINR_	71	Specific	transcript=PF3D7_1304500.1	-0.494893	0.494893	1.13446e-16	4.94021e-15	36	transcript=PF3D7_1304500.1	NaN	gene=PF3D7_1304500 | organism=Plasmodium_falciparum_3D7 | gene_product=small heat shock protein, putative | transcript_product=small heat shock protein, putative | location=Pf3D7_13_v3:235800-236435(-) | protein_length=211 | sequence_SO=chromosome | SO=protein_coding | is_pseudo=false	NaN	1	-29.0386	0.709614	2673-10uM	DMSO
2673-1uM / DMSO	_ILINSDEHNSEIINEK_	152	Specific-N	transcript=PF3D7_1454400.1	0.95086	0.95086	1.13778e-16	4.94525e-15	63	transcript=PF3D7_1454400.1	NaN	gene=PF3D7_1454400 | organism=Plasmodium_falciparum_3D7 | gene_product=aminopeptidase P | transcript_product=aminopeptidase P | location=Pf3D7_14_v3:2234143-2236476(+) | protein_length=777 | sequence_SO=chromosome | SO=protein_coding | is_pseudo=false	NaN	1	93.3024	1.93302	2673-1uM	DMSO
2673-10uM / DMSO	_LYHLPHPTIYPK_	237	Specific	transcript=PF3D7_1328100.1	0.877913	0.877913	1.19554e-16	5.18643e-15	81	transcript=PF3D7_1328100.1	NaN	gene=PF3D7_1328100 | organism=Plasmodium_falciparum_3D7 | gene_product=proteasome subunit beta type-7, putative | transcript_product=proteasome subunit beta type-7, putative | location=Pf3D7_13_v3:1184208-1185020(+) | protein_length=270 | sequence_SO=chromosome | SO=protein_coding | is_pseudo=false	NaN	1	83.7714	1.83771	2673-10uM	DMSO
2673-10uM / DMSO	_TIVIEHVL_	701	Specific-C	transcript=PF3D7_0517700.1	-0.575986	0.575986	1.20246e-16	5.20655e-15	54	transcript=PF3D7_0517700.1	NaN	gene=PF3D7_0517700 | organism=Plasmodium_falciparum_3D7 | gene_product=eukaryotic translation initiation factor 3 subunit B, putative | transcript_product=eukaryotic translation initiation factor 3 subunit B, putative | location=Pf3D7_05_v3:743179-745329(+) | protein_length=716 | sequence_SO=chromosome | SO=protein_coding | is_pseudo=false	NaN	1	-32.9172	0.670828	2673-10uM	DMSO
2673-1uM / DMSO	_FVNPIVVGF_	106	Unspecific	transcript=PF3D7_0108000.1	-0.926399	0.926399	1.20995e-16	5.22909e-15	54	transcript=PF3D7_0108000.1	NaN	gene=PF3D7_0108000 | organism=Plasmodium_falciparum_3D7 | gene_product=proteasome subunit beta type-3, putative | transcript_product=proteasome subunit beta type-3, putative | location=Pf3D7_01_v3:328431-329558(-) | protein_length=218 | sequence_SO=chromosome | SO=protein_coding | is_pseudo=false	NaN	1	-47.383	0.52617	2673-1uM	DMSO
2673-10uM / DMSO	_VMVLDFVTPTPLGTR_	88;188;107;38;188	Specific	A0A087WSW9;A0A087WSY9;A0A182DWI3;F8W809;Q16881	1.0307	1.0307	1.24591e-16	5.37174e-15	36	A0A087WSW9;A0A087WSY9;A0A182DWI3;F8W809;Q16881	TXNRD1	Thioredoxin reductase 1, cytoplasmic;Thioredoxin reductase 1, cytoplasmic;Thioredoxin reductase 1, cytoplasmic;Thioredoxin reductase 1, cytoplasmic;Thioredoxin reductase 1, cytoplasmic	A0A087WSW9_HUMAN;A0A087WSY9_HUMAN;A0A182DWI3_HUMAN;F8W809_HUMAN;TRXR1_HUMAN	1	104.301	2.04301	2673-10uM	DMSO
2673-10uM / DMSO	_QLTIDFLGH_	187	Unspecific	transcript=PF3D7_1242800.1	-0.567834	0.567834	1.24766e-16	5.37174e-15	45	transcript=PF3D7_1242800.1	NaN	gene=PF3D7_1242800 | organism=Plasmodium_falciparum_3D7 | gene_product=rab specific GDP dissociation inhibitor | transcript_product=rab specific GDP dissociation inhibitor | location=Pf3D7_12_v3:1805380-1807356(-) | protein_length=459 | sequence_SO=chromosome | SO=protein_coding | is_pseudo=false	NaN	1	-32.5371	0.674629	2673-10uM	DMSO
2673-10uM / DMSO	_YIINTIGTIDKPR_	1100	Specific	transcript=PF3D7_1360800.1	0.388524	0.388524	1.26972e-16	5.45646e-15	99	transcript=PF3D7_1360800.1	NaN	gene=PF3D7_1360800 | organism=Plasmodium_falciparum_3D7 | gene_product=falcilysin | transcript_product=falcilysin | location=Pf3D7_13_v3:2435343-2438924(+) | protein_length=1193 | sequence_SO=chromosome | SO=protein_coding | is_pseudo=false	NaN	1	30.9053	1.30905	2673-10uM	DMSO
2673-10uM / DMSO	_YLPFTNNLR_	1000	Specific-N	transcript=PF3D7_1311800.1	-0.415962	0.415962	1.27834e-16	5.48321e-15	45	transcript=PF3D7_1311800.1	NaN	gene=PF3D7_1311800 | organism=Plasmodium_falciparum_3D7 | gene_product=M1-family alanyl aminopeptidase | transcript_product=M1-family alanyl aminopeptidase | location=Pf3D7_13_v3:501790-505047(+) | protein_length=1085 | sequence_SO=chromosome | SO=protein_coding | is_pseudo=false	NaN	1	-25.0481	0.749519	2673-10uM	DMSO
2673-10uM / DMSO	_FSDGLAHLD_	72	Unspecific	P02042	-0.501797	0.501797	1.30773e-16	5.59874e-15	72	P02042	HBD	Hemoglobin subunit delta	HBD_HUMAN	1	-29.3773	0.706227	2673-10uM	DMSO
2673-10uM / DMSO	_RSGDPSQPLLPQHS_	180	Unspecific	P02730	-0.65627	0.65627	1.33493e-16	5.70451e-15	81	P02730	SLC4A1	Band 3 anion transport protein	B3AT_HUMAN	1	-36.5483	0.634517	2673-10uM	DMSO
2673-10uM / DMSO	_LIAPPQYVIVTSC[Carbamidomethyl (C)]HDK_	229	Specific	transcript=PF3D7_0728000.1	1.23318	1.23318	1.34258e-16	5.72651e-15	63	transcript=PF3D7_0728000.1	NaN	gene=PF3D7_0728000 | organism=Plasmodium_falciparum_3D7 | gene_product=eukaryotic translation initiation factor 2 subunit alpha | transcript_product=eukaryotic translation initiation factor 2 subunit alpha | location=Pf3D7_07_v3:1191179-1192289(-) | protein_length=329 | sequence_SO=chromosome | SO=protein_coding | is_pseudo=false	NaN	1	135.084	2.35084	2673-10uM	DMSO
2673-10uM / DMSO	_YNPSENIMDHQEMVK_	487	Specific	transcript=PF3D7_1420700.1	-0.605597	0.605597	1.37031e-16	5.83389e-15	81	transcript=PF3D7_1420700.1	NaN	gene=PF3D7_1420700 | organism=Plasmodium_falciparum_3D7 | gene_product=surface protein P113 | transcript_product=surface protein P113 | location=Pf3D7_14_v3:860011-863080(+) | protein_length=969 | sequence_SO=chromosome | SO=protein_coding | is_pseudo=false	NaN	1	-34.2801	0.657199	2673-10uM	DMSO
2673-10uM / DMSO	_LQVLIAEGYK_	619	Specific	transcript=PF3D7_1420700.1	-0.973606	0.973606	1.39191e-16	5.91484e-15	54	transcript=PF3D7_1420700.1	NaN	gene=PF3D7_1420700 | organism=Plasmodium_falciparum_3D7 | gene_product=surface protein P113 | transcript_product=surface protein P113 | location=Pf3D7_14_v3:860011-863080(+) | protein_length=969 | sequence_SO=chromosome | SO=protein_coding | is_pseudo=false	NaN	1	-49.0768	0.509232	2673-10uM	DMSO
2673-1uM / DMSO	_LLTEFVLNDAL_	595	Specific	transcript=PF3D7_1446200.1	0.816116	0.816116	1.4678e-16	6.22575e-15	54	transcript=PF3D7_1446200.1	NaN	gene=PF3D7_1446200 | organism=Plasmodium_falciparum_3D7 | gene_product=M17 leucyl aminopeptidase | transcript_product=M17 leucyl aminopeptidase | location=Pf3D7_14_v3:1893200-1895017(-) | protein_length=605 | sequence_SO=chromosome | SO=protein_coding | is_pseudo=false	NaN	1	76.0659	1.76066	2673-1uM	DMSO
2673-1uM / DMSO	_GGFVLLDGETFEVK_	161	Specific	Q13228	0.302739	0.302739	1.51308e-16	6.40591e-15	54	Q13228	SELENBP1	Selenium-binding protein 1	SBP1_HUMAN	1	23.3484	1.23348	2673-1uM	DMSO
2673-10uM / DMSO	_IDNALFTFYLPVHDK_	270	Specific	transcript=PF3D7_1407800.1	1.50677	1.50677	1.52626e-16	6.44979e-15	54	transcript=PF3D7_1407800.1	NaN	gene=PF3D7_1407800 | organism=Plasmodium_falciparum_3D7 | gene_product=plasmepsin IV | transcript_product=plasmepsin IV | location=Pf3D7_14_v3:283086-284435(+) | protein_length=449 | sequence_SO=chromosome | SO=protein_coding | is_pseudo=false	NaN	1	184.173	2.84173	2673-10uM	DMSO
2673-1uM / DMSO	_HTNIPLHILVNR_	106	Specific-N	transcript=PF3D7_0317000.1	-0.490488	0.490488	1.53584e-16	6.47832e-15	99	transcript=PF3D7_0317000.1	NaN	gene=PF3D7_0317000 | organism=Plasmodium_falciparum_3D7 | gene_product=proteasome subunit alpha type-3, putative | transcript_product=proteasome subunit alpha type-3, putative | location=Pf3D7_03_v3:682795-683685(-) | protein_length=252 | sequence_SO=chromosome | SO=protein_coding | is_pseudo=false	NaN	1	-28.8216	0.711784	2673-1uM	DMSO
2673-10uM / DMSO	_SVHGC[Carbamidomethyl (C)]IPLILQ_	224	Specific-C	transcript=PF3D7_0524000.1	-0.288821	0.288821	1.55442e-16	6.54459e-15	54	transcript=PF3D7_0524000.1	NaN	gene=PF3D7_0524000 | organism=Plasmodium_falciparum_3D7 | gene_product=karyopherin beta | transcript_product=karyopherin beta | location=Pf3D7_05_v3:998753-1002124(+) | protein_length=1123 | sequence_SO=chromosome | SO=protein_coding | is_pseudo=false	NaN	1	-18.1429	0.818571	2673-10uM	DMSO
2673-10uM / DMSO	_NPDMANIQAYLK_	56	Specific	transcript=PF3D7_0306300.1	1.10519	1.10519	1.58331e-16	6.65396e-15	54	transcript=PF3D7_0306300.1	NaN	gene=PF3D7_0306300 | organism=Plasmodium_falciparum_3D7 | gene_product=glutaredoxin 1 | transcript_product=glutaredoxin 1 | location=Pf3D7_03_v3:295107-296094(-) | protein_length=111 | sequence_SO=chromosome | SO=protein_coding | is_pseudo=false	NaN	1	115.127	2.15127	2673-10uM	DMSO
2673-1uM / DMSO	_TNATIKPAIYLLDSGGQYLHGTTDVTR_	558	Specific	transcript=PF3D7_1454400.1	1.57699	1.57699	1.61953e-16	6.79369e-15	63	transcript=PF3D7_1454400.1	NaN	gene=PF3D7_1454400 | organism=Plasmodium_falciparum_3D7 | gene_product=aminopeptidase P | transcript_product=aminopeptidase P | location=Pf3D7_14_v3:2234143-2236476(+) | protein_length=777 | sequence_SO=chromosome | SO=protein_coding | is_pseudo=false	NaN	1	198.346	2.98346	2673-1uM	DMSO
2673-1uM / DMSO	_AINQGGLTSVAVR_	31;31	Specific	G3V5Z7;P60900	1.09967	1.09967	1.63698e-16	6.85435e-15	36	G3V5Z7;P60900	PSMA6	Proteasome subunit alpha type;Proteasome subunit alpha type-6	G3V5Z7_HUMAN;PSA6_HUMAN	1	114.306	2.14306	2673-1uM	DMSO
2673-10uM / DMSO	_AGEYGAEALER_	22	Specific-N	P69905	0.545335	0.545335	1.64334e-16	6.86836e-15	54	P69905	HBA1	Hemoglobin subunit alpha	HBA_HUMAN	1	45.9359	1.45936	2673-10uM	DMSO
2673-1uM / DMSO	_AHIVGIDIFTGR_	56	Specific	transcript=PF3D7_1204300.1	-0.848419	0.848419	1.65072e-16	6.88663e-15	90	transcript=PF3D7_1204300.1	NaN	gene=PF3D7_1204300 | organism=Plasmodium_falciparum_3D7 | gene_product=eukaryotic translation initiation factor 5A | transcript_product=eukaryotic translation initiation factor 5A | location=Pf3D7_12_v3:205491-205976(-) | protein_length=161 | sequence_SO=chromosome | SO=protein_coding | is_pseudo=false	NaN	1	-44.4607	0.555393	2673-1uM	DMSO
2673-10uM / DMSO	_LTGVAFR_	231	Specific	transcript=PF3D7_1462800.1	0.754746	0.754746	1.70428e-16	7.09713e-15	72	transcript=PF3D7_1462800.1	NaN	gene=PF3D7_1462800 | organism=Plasmodium_falciparum_3D7 | gene_product=glyceraldehyde-3-phosphate dehydrogenase | transcript_product=glyceraldehyde-3-phosphate dehydrogenase | location=Pf3D7_14_v3:2559098-2560347(+) | protein_length=337 | sequence_SO=chromosome | SO=protein_coding | is_pseudo=false	NaN	1	68.7335	1.68733	2673-10uM	DMSO
2673-10uM / DMSO	_HMNIVLVDAEEFR_	35	Specific	transcript=PF3D7_1414800.1	0.4054	0.4054	1.70839e-16	7.1013e-15	72	transcript=PF3D7_1414800.1	NaN	gene=PF3D7_1414800 | organism=Plasmodium_falciparum_3D7 | gene_product=small nuclear ribonucleoprotein-associated protein B, putative | transcript_product=small nuclear ribonucleoprotein-associated protein B, putative | location=Pf3D7_14_v3:599763-600680(-) | protein_length=201 | sequence_SO=chromosome | SO=protein_coding | is_pseudo=false	NaN	1	32.4456	1.32446	2673-10uM	DMSO
2673-1uM / DMSO	_NSIDFSYAR_	481	Specific	transcript=PF3D7_1311800.1	1.12574	1.12574	1.72637e-16	7.16301e-15	36	transcript=PF3D7_1311800.1	NaN	gene=PF3D7_1311800 | organism=Plasmodium_falciparum_3D7 | gene_product=M1-family alanyl aminopeptidase | transcript_product=M1-family alanyl aminopeptidase | location=Pf3D7_13_v3:501790-505047(+) | protein_length=1085 | sequence_SO=chromosome | SO=protein_coding | is_pseudo=false	NaN	1	118.213	2.18213	2673-1uM	DMSO
2673-10uM / DMSO	_NDMTLEEGLLL_	181	Specific-C	transcript=PF3D7_1353800.1	-1.1401	1.1401	1.73293e-16	7.17724e-15	45	transcript=PF3D7_1353800.1	NaN	gene=PF3D7_1353800 | organism=Plasmodium_falciparum_3D7 | gene_product=proteasome subunit alpha type-4, putative | transcript_product=proteasome subunit alpha type-4, putative | location=Pf3D7_13_v3:2151402-2152373(-) | protein_length=246 | sequence_SO=chromosome | SO=protein_coding | is_pseudo=false	NaN	1	-54.6273	0.453727	2673-10uM	DMSO
2673-10uM / DMSO	_RVAPEEHPVLLT_	95	Unspecific	P60709	-0.35117	0.35117	1.81753e-16	7.514e-15	99	P60709	ACTB	Actin, cytoplasmic 1	ACTB_HUMAN	1	-21.6052	0.783948	2673-10uM	DMSO
2673-10uM / DMSO	_LKEELDGIDPSNIIDTTTRPR_	282	Specific	transcript=PF3D7_1140200.1	-1.90659	1.90659	1.8401e-16	7.59357e-15	54	transcript=PF3D7_1140200.1	NaN	gene=PF3D7_1140200 | organism=Plasmodium_falciparum_3D7 | gene_product=conserved Plasmodium protein, unknown function | transcript_product=conserved Plasmodium protein, unknown function | location=Pf3D7_11_v3:1601257-1603078(-) | protein_length=447 | sequence_SO=chromosome | SO=protein_coding | is_pseudo=false	NaN	1	-73.3277	0.266723	2673-10uM	DMSO
2673-10uM / DMSO	_VPDVNIEAIK_	39	Specific	transcript=PF3D7_1226300.1	0.300001	0.300001	1.89108e-16	7.78987e-15	54	transcript=PF3D7_1226300.1	NaN	gene=PF3D7_1226300 | organism=Plasmodium_falciparum_3D7 | gene_product=haloacid dehalogenase-like hydrolase, putative | transcript_product=haloacid dehalogenase-like hydrolase, putative | location=Pf3D7_12_v3:1065796-1066683(+) | protein_length=295 | sequence_SO=chromosome | SO=protein_coding | is_pseudo=false	NaN	1	23.1145	1.23115	2673-10uM	DMSO
2673-10uM / DMSO	_ASDIQKTYKEK_	855	Specific	transcript=PF3D7_0935200.1	-0.700304	0.700304	1.99415e-16	8.19405e-15	45	transcript=PF3D7_0935200.1	NaN	gene=PF3D7_0935200 | organism=Plasmodium_falciparum_3D7 | gene_product=vacuolar protein sorting-associated protein 33, putative | transcript_product=vacuolar protein sorting-associated protein 33, putative | location=Pf3D7_09_v3:1368594-1372037(-) | protein_length=1147 | sequence_SO=chromosome | SO=protein_coding | is_pseudo=false	NaN	1	-38.4557	0.615443	2673-10uM	DMSO
2673-10uM / DMSO	_IVVEFDYIR_	475	Specific	transcript=PF3D7_1364100.1	-0.627041	0.627041	1.99636e-16	8.19405e-15	45	transcript=PF3D7_1364100.1	NaN	gene=PF3D7_1364100 | organism=Plasmodium_falciparum_3D7 | gene_product=6-cysteine protein | transcript_product=6-cysteine protein | location=Pf3D7_13_v3:2568556-2570946(+) | protein_length=796 | sequence_SO=chromosome | SO=protein_coding | is_pseudo=false	NaN	1	-35.2497	0.647503	2673-10uM	DMSO
2673-10uM / DMSO	_VLSC[Carbamidomethyl (C)]VFK_	216	Specific	transcript=PF3D7_1444800.1	0.757968	0.757968	2.24992e-16	9.21824e-15	36	transcript=PF3D7_1444800.1	NaN	gene=PF3D7_1444800 | organism=Plasmodium_falciparum_3D7 | gene_product=fructose-bisphosphate aldolase | transcript_product=fructose-bisphosphate aldolase | location=Pf3D7_14_v3:1844041-1845617(-) | protein_length=369 | sequence_SO=chromosome | SO=protein_coding | is_pseudo=false	NaN	1	69.1107	1.69111	2673-10uM	DMSO
2673-10uM / DMSO	_MTGENPLQVF_	94	Unspecific	transcript=PF3D7_0721600.1	-0.557276	0.557276	2.25552e-16	9.22465e-15	54	transcript=PF3D7_0721600.1	NaN	gene=PF3D7_0721600 | organism=Plasmodium_falciparum_3D7 | gene_product=40S ribosomal protein S5, putative | transcript_product=40S ribosomal protein S5, putative | location=Pf3D7_07_v3:931459-932164(-) | protein_length=195 | sequence_SO=chromosome | SO=protein_coding | is_pseudo=false	NaN	1	-32.0416	0.679584	2673-10uM	DMSO
2673-1uM / DMSO	_SIDPVVVELK_	256	Specific-N	transcript=PF3D7_1407800.1	-0.395952	0.395952	2.36564e-16	9.65772e-15	54	transcript=PF3D7_1407800.1	NaN	gene=PF3D7_1407800 | organism=Plasmodium_falciparum_3D7 | gene_product=plasmepsin IV | transcript_product=plasmepsin IV | location=Pf3D7_14_v3:283086-284435(+) | protein_length=449 | sequence_SO=chromosome | SO=protein_coding | is_pseudo=false	NaN	1	-24.0012	0.759988	2673-1uM	DMSO
2673-10uM / DMSO	_VAEEHAPSIVF_	273	Specific-C	P62191	0.634202	0.634202	2.38771e-16	9.73044e-15	36	P62191	PSMC1	26S proteasome regulatory subunit 4	PRS4_HUMAN	1	55.2079	1.55208	2673-10uM	DMSO
2673-1uM / DMSO	_SVLDMEAITFK_	256	Specific-N	P07384	0.409201	0.409201	2.43133e-16	9.89059e-15	45	P07384	CAPN1	Calpain-1 catalytic subunit	CAN1_HUMAN	1	32.795	1.32795	2673-1uM	DMSO
2673-1uM / DMSO	_FDNNFVQGIITC[Carbamidomethyl (C)]FK_	257	Specific	transcript=PF3D7_0512200.1	0.69868	0.69868	2.44293e-16	9.90253e-15	36	transcript=PF3D7_0512200.1	NaN	gene=PF3D7_0512200 | organism=Plasmodium_falciparum_3D7 | gene_product=glutathione synthetase | transcript_product=glutathione synthetase | location=Pf3D7_05_v3:529934-531901(-) | protein_length=655 | sequence_SO=chromosome | SO=protein_coding | is_pseudo=false	NaN	1	62.3019	1.62302	2673-1uM	DMSO
2673-10uM / DMSO	_SILVSC[Carbamidomethyl (C)]PTSSGK_	1250	Specific	transcript=PF3D7_0903400.1	0.226751	0.226751	2.44232e-16	9.90253e-15	54	transcript=PF3D7_0903400.1	NaN	gene=PF3D7_0903400 | organism=Plasmodium_falciparum_3D7 | gene_product=ATP-dependent RNA helicase DDX60, putative | transcript_product=ATP-dependent RNA helicase DDX60, putative | location=Pf3D7_09_v3:151700-159541(-) | protein_length=2536 | sequence_SO=chromosome | SO=protein_coding | is_pseudo=false	NaN	1	17.0197	1.1702	2673-10uM	DMSO
2673-10uM / DMSO	_ALLTPVAIAA_	380	Specific-C	P00390	-1.141	1.141	2.47783e-16	1.00262e-14	54	P00390	GSR	Glutathione reductase, mitochondrial	GSHR_HUMAN	1	-54.6555	0.453445	2673-10uM	DMSO
2673-1uM / DMSO	_AC[Carbamidomethyl (C)]QIISIIAK_	114	Specific-N	transcript=PF3D7_0815200.1	-0.550972	0.550972	2.53404e-16	1.02175e-14	54	transcript=PF3D7_0815200.1	NaN	gene=PF3D7_0815200 | organism=Plasmodium_falciparum_3D7 | gene_product=importin subunit beta, putative | transcript_product=importin subunit beta, putative | location=Pf3D7_08_v3:717113-719746(+) | protein_length=877 | sequence_SO=chromosome | SO=protein_coding | is_pseudo=false	NaN	1	-31.744	0.68256	2673-1uM	DMSO
2673-1uM / DMSO	_QIVVGVNK_	147;147	Specific	transcript=PF3D7_1357000.1;transcript=PF3D7_1357100.1	0.482478	0.482478	2.53217e-16	1.02175e-14	108	transcript=PF3D7_1357000.1;transcript=PF3D7_1357100.1	NaN	gene=PF3D7_1357000 | organism=Plasmodium_falciparum_3D7 | gene_product=elongation factor 1-alpha | transcript_product=elongation factor 1-alpha | location=Pf3D7_13_v3:2265817-2267148(-) | protein_length=443 | sequence_SO=chromosome | SO=protein_coding | is_pseudo=false;gene=PF3D7_1357100 | organism=Plasmodium_falciparum_3D7 | gene_product=elongation factor 1-alpha | transcript_product=elongation …	NaN	1	39.7141	1.39714	2673-1uM	DMSO
2673-1uM / DMSO	_ILVEFSDK_	371;295	Specific	transcript=PF3D7_0923800.1;transcript=PF3D7_0923800.2	0.591008	0.591008	2.64438e-16	1.06436e-14	45	transcript=PF3D7_0923800.1;transcript=PF3D7_0923800.2	NaN	gene=PF3D7_0923800 | organism=Plasmodium_falciparum_3D7 | gene_product=thioredoxin reductase | transcript_product=thioredoxin reductase | location=Pf3D7_09_v3:961933-963786(-) | protein_length=617 | sequence_SO=chromosome | SO=protein_coding | is_pseudo=false;gene=PF3D7_0923800 | organism=Plasmodium_falciparum_3D7 | gene_product=thioredoxin reductase | transcript_product=thioredoxin reductase | l…	NaN	1	50.6299	1.5063	2673-1uM	DMSO
2673-10uM / DMSO	_SLDPTSIPIEYNTPIHDIK_	93	Specific-N	transcript=PF3D7_1446200.1	-0.628138	0.628138	2.66835e-16	1.07212e-14	54	transcript=PF3D7_1446200.1	NaN	gene=PF3D7_1446200 | organism=Plasmodium_falciparum_3D7 | gene_product=M17 leucyl aminopeptidase | transcript_product=M17 leucyl aminopeptidase | location=Pf3D7_14_v3:1893200-1895017(-) | protein_length=605 | sequence_SO=chromosome | SO=protein_coding | is_pseudo=false	NaN	1	-35.2989	0.647011	2673-10uM	DMSO
2673-10uM / DMSO	_KVEDLIVLLGK_	145	Specific-N	transcript=PF3D7_0417200.1	-0.737712	0.737712	2.72979e-16	1.09489e-14	81	transcript=PF3D7_0417200.1	NaN	gene=PF3D7_0417200 | organism=Plasmodium_falciparum_3D7 | gene_product=bifunctional dihydrofolate reductase-thymidylate synthase | transcript_product=bifunctional dihydrofolate reductase-thymidylate synthase | location=Pf3D7_04_v3:748088-749914(+) | protein_length=608 | sequence_SO=chromosome | SO=protein_coding | is_pseudo=false	NaN	1	-40.031	0.59969	2673-10uM	DMSO
2673-10uM / DMSO	_EAFSLFDK_	16;53;15;15;15	Specific	E7ETZ0;H0Y7A7;P0DP23;P0DP24;P0DP25	0.861127	0.861127	2.9288e-16	1.17265e-14	36	E7ETZ0;H0Y7A7;P0DP23;P0DP24;P0DP25	CALM1;CALM2;CALM1;CALM2;CALM3	Calmodulin-1;Calmodulin-2 (Fragment);Calmodulin-1;Calmodulin-2;Calmodulin-3	E7ETZ0_HUMAN;H0Y7A7_HUMAN;CALM1_HUMAN;CALM2_HUMAN;CALM3_HUMAN	1	81.6456	1.81646	2673-10uM	DMSO
2673-10uM / DMSO	_DLFDFILNAGK_	103	Specific-N	transcript=PF3D7_1437900.1	-0.645876	0.645876	2.95861e-16	1.18251e-14	45	transcript=PF3D7_1437900.1	NaN	gene=PF3D7_1437900 | organism=Plasmodium_falciparum_3D7 | gene_product=HSP40, subfamily A | transcript_product=HSP40, subfamily A | location=Pf3D7_14_v3:1533329-1534947(+) | protein_length=424 | sequence_SO=chromosome | SO=protein_coding | is_pseudo=false	NaN	1	-36.0895	0.639105	2673-10uM	DMSO
2673-10uM / DMSO	_GMPGGMPGGMPGGMPGGM_	633	Unspecific	transcript=PF3D7_0818900.1	-0.59946	0.59946	3.23985e-16	1.29266e-14	45	transcript=PF3D7_0818900.1	NaN	gene=PF3D7_0818900 | organism=Plasmodium_falciparum_3D7 | gene_product=heat shock protein 70 | transcript_product=heat shock protein 70 | location=Pf3D7_08_v3:860384-862417(+) | protein_length=677 | sequence_SO=chromosome | SO=protein_coding | is_pseudo=false	NaN	1	-33.9999	0.660001	2673-10uM	DMSO
2673-10uM / DMSO	_NHLDGFEELGNVK_	266	Specific-N	transcript=PF3D7_1306400.1	-0.344502	0.344502	3.3721e-16	1.34308e-14	81	transcript=PF3D7_1306400.1	NaN	gene=PF3D7_1306400 | organism=Plasmodium_falciparum_3D7 | gene_product=26S protease regulatory subunit 10B, putative | transcript_product=26S protease regulatory subunit 10B, putative | location=Pf3D7_13_v3:297178-298359(-) | protein_length=393 | sequence_SO=chromosome | SO=protein_coding | is_pseudo=false	NaN	1	-21.242	0.78758	2673-10uM	DMSO
2673-10uM / DMSO	_IWEHLGFTPENIVQK_	648	Specific	transcript=PF3D7_0610800.1	0.227929	0.227929	3.38533e-16	1.34601e-14	99	transcript=PF3D7_0610800.1	NaN	gene=PF3D7_0610800 | organism=Plasmodium_falciparum_3D7 | gene_product=transketolase | transcript_product=transketolase | location=Pf3D7_06_v3:453671-455689(+) | protein_length=672 | sequence_SO=chromosome | SO=protein_coding | is_pseudo=false	NaN	1	17.1153	1.17115	2673-10uM	DMSO
2673-1uM / DMSO	_SQIENAISDVMGKPL_	22	Unspecific	transcript=PF3D7_1229400.1	-1.40571	1.40571	3.40494e-16	1.35145e-14	54	transcript=PF3D7_1229400.1	NaN	gene=PF3D7_1229400 | organism=Plasmodium_falciparum_3D7 | gene_product=macrophage migration inhibitory factor | transcript_product=macrophage migration inhibitory factor | location=Pf3D7_12_v3:1208912-1209542(+) | protein_length=116 | sequence_SO=chromosome | SO=protein_coding | is_pseudo=false	NaN	1	-62.2569	0.377431	2673-1uM	DMSO
2673-10uM / DMSO	_KELPFLLK_	270	Specific-N	transcript=PF3D7_0102900.1	0.919468	0.919468	3.50539e-16	1.38891e-14	36	transcript=PF3D7_0102900.1	NaN	gene=PF3D7_0102900 | organism=Plasmodium_falciparum_3D7 | gene_product=aspartate--tRNA ligase | transcript_product=aspartate--tRNA ligase | location=Pf3D7_01_v3:128960-130840(-) | protein_length=626 | sequence_SO=chromosome | SO=protein_coding | is_pseudo=false	NaN	1	89.1418	1.89142	2673-10uM	DMSO
2673-10uM / DMSO	_LNVINGGSHAGNKL_	158	Unspecific	transcript=PF3D7_1015900.1	-0.860797	0.860797	3.541e-16	1.4006e-14	72	transcript=PF3D7_1015900.1	NaN	gene=PF3D7_1015900 | organism=Plasmodium_falciparum_3D7 | gene_product=enolase | transcript_product=enolase | location=Pf3D7_10_v3:637138-639011(+) | protein_length=446 | sequence_SO=chromosome | SO=protein_coding | is_pseudo=false	NaN	1	-44.9352	0.550648	2673-10uM	DMSO
2673-1uM / DMSO	_MIDESEVLTIA_	102	Unspecific	transcript=PF3D7_0621200.1	-0.797285	0.797285	3.70901e-16	1.46452e-14	45	transcript=PF3D7_0621200.1	NaN	gene=PF3D7_0621200 | organism=Plasmodium_falciparum_3D7 | gene_product=pyridoxine biosynthesis protein PDX1 | transcript_product=pyridoxine biosynthesis protein PDX1 | location=Pf3D7_06_v3:871297-872202(-) | protein_length=301 | sequence_SO=chromosome | SO=protein_coding | is_pseudo=false	NaN	1	-42.4569	0.575431	2673-1uM	DMSO
2673-10uM / DMSO	_SPFNSTVYK_	562	Specific	transcript=PF3D7_0511800.1	0.835833	0.835833	3.7465e-16	1.47677e-14	36	transcript=PF3D7_0511800.1	NaN	gene=PF3D7_0511800 | organism=Plasmodium_falciparum_3D7 | gene_product=inositol-3-phosphate synthase | transcript_product=inositol-3-phosphate synthase | location=Pf3D7_05_v3:520720-522693(-) | protein_length=604 | sequence_SO=chromosome | SO=protein_coding | is_pseudo=false	NaN	1	78.4887	1.78489	2673-10uM	DMSO
2673-10uM / DMSO	_LSTPQPEDIGK_	335	Specific	transcript=PF3D7_0214000.1	0.44006	0.44006	3.76025e-16	1.47802e-14	45	transcript=PF3D7_0214000.1	NaN	gene=PF3D7_0214000 | organism=Plasmodium_falciparum_3D7 | gene_product=T-complex protein 1 subunit theta | transcript_product=T-complex protein 1 subunit theta | location=Pf3D7_02_v3:566121-567894(+) | protein_length=542 | sequence_SO=chromosome | SO=protein_coding | is_pseudo=false	NaN	1	35.6661	1.35666	2673-10uM	DMSO
2673-10uM / DMSO	_LNLENVVLNNK_	289	Specific	transcript=PF3D7_1410200.1	0.490771	0.490771	3.76261e-16	1.47802e-14	45	transcript=PF3D7_1410200.1	NaN	gene=PF3D7_1410200 | organism=Plasmodium_falciparum_3D7 | gene_product=CTP synthase | transcript_product=CTP synthase | location=Pf3D7_14_v3:400418-402994(+) | protein_length=858 | sequence_SO=chromosome | SO=protein_coding | is_pseudo=false	NaN	1	40.5196	1.4052	2673-10uM	DMSO
2673-10uM / DMSO	_FNDYNPLVENVAHITK_	152	Specific	transcript=PF3D7_0931800.1	0.955116	0.955116	4.02774e-16	1.57744e-14	81	transcript=PF3D7_0931800.1	NaN	gene=PF3D7_0931800 | organism=Plasmodium_falciparum_3D7 | gene_product=proteasome subunit beta type-6, putative | transcript_product=proteasome subunit beta type-6, putative | location=Pf3D7_09_v3:1273082-1273930(-) | protein_length=282 | sequence_SO=chromosome | SO=protein_coding | is_pseudo=false	NaN	1	93.8736	1.93874	2673-10uM	DMSO
2673-1uM / DMSO	_LTELNNDVGQYLR_	287	Specific-N	transcript=PF3D7_1354500.1	-0.353855	0.353855	4.02951e-16	1.57744e-14	54	transcript=PF3D7_1354500.1	NaN	gene=PF3D7_1354500 | organism=Plasmodium_falciparum_3D7 | gene_product=adenylosuccinate synthetase | transcript_product=adenylosuccinate synthetase | location=Pf3D7_13_v3:2174346-2175797(+) | protein_length=442 | sequence_SO=chromosome | SO=protein_coding | is_pseudo=false	NaN	1	-21.751	0.78249	2673-1uM	DMSO
2673-1uM / DMSO	_TNAVAHVDDMPNAL_	68	Unspecific	P69905	0.44018	0.44018	4.11759e-16	1.60917e-14	54	P69905	HBA1	Hemoglobin subunit alpha	HBA_HUMAN	1	35.6774	1.35677	2673-1uM	DMSO
2673-10uM / DMSO	_YDSVHGQFPC[Carbamidomethyl (C)]EVTHADGF_	49	Specific-C	transcript=PF3D7_1462800.1	0.241545	0.241545	4.1449e-16	1.61708e-14	54	transcript=PF3D7_1462800.1	NaN	gene=PF3D7_1462800 | organism=Plasmodium_falciparum_3D7 | gene_product=glyceraldehyde-3-phosphate dehydrogenase | transcript_product=glyceraldehyde-3-phosphate dehydrogenase | location=Pf3D7_14_v3:2559098-2560347(+) | protein_length=337 | sequence_SO=chromosome | SO=protein_coding | is_pseudo=false	NaN	1	18.2258	1.18226	2673-10uM	DMSO
2673-10uM / DMSO	_GDPSQPLLPQHS_	182	Unspecific	P02730	-1.00722	1.00722	4.23625e-16	1.6499e-14	36	P02730	SLC4A1	Band 3 anion transport protein	B3AT_HUMAN	1	-50.2497	0.497503	2673-10uM	DMSO
2673-10uM / DMSO	_AHNYDPIPVVLK_	22	Specific-N	transcript=PF3D7_0608800.1	0.408898	0.408898	4.25005e-16	1.65246e-14	81	transcript=PF3D7_0608800.1	NaN	gene=PF3D7_0608800 | organism=Plasmodium_falciparum_3D7 | gene_product=ornithine aminotransferase | transcript_product=ornithine aminotransferase | location=Pf3D7_06_v3:362635-363879(+) | protein_length=414 | sequence_SO=chromosome | SO=protein_coding | is_pseudo=false	NaN	1	32.7671	1.32767	2673-10uM	DMSO
2673-1uM / DMSO	_SVHDALC[Carbamidomethyl (C)]SVR_	396	Specific	transcript=PF3D7_0320300.1	0.348513	0.348513	4.29733e-16	1.66801e-14	90	transcript=PF3D7_0320300.1	NaN	gene=PF3D7_0320300 | organism=Plasmodium_falciparum_3D7 | gene_product=T-complex protein 1 subunit epsilon | transcript_product=T-complex protein 1 subunit epsilon | location=Pf3D7_03_v3:845713-847320(+) | protein_length=535 | sequence_SO=chromosome | SO=protein_coding | is_pseudo=false	NaN	1	27.3248	1.27325	2673-1uM	DMSO
2673-1uM / DMSO	_ITRPTDVPDNGLLC[Carbamidomethyl (C)]DL_	187	Specific-C	transcript=PF3D7_1414400.1	-0.311948	0.311948	4.47917e-16	1.73564e-14	45	transcript=PF3D7_1414400.1	NaN	gene=PF3D7_1414400 | organism=Plasmodium_falciparum_3D7 | gene_product=serine/threonine protein phosphatase PP1 | transcript_product=serine/threonine protein phosphatase PP1 | location=Pf3D7_14_v3:575496-577055(+) | protein_length=304 | sequence_SO=chromosome | SO=protein_coding | is_pseudo=false	NaN	1	-19.4447	0.805553	2673-1uM	DMSO
2673-10uM / DMSO	_IVC[Carbamidomethyl (C)]LSDEVR_	5	Specific	transcript=PF3D7_1127100.1	1.82777	1.82777	4.4874e-16	1.73589e-14	36	transcript=PF3D7_1127100.1	NaN	gene=PF3D7_1127100 | organism=Plasmodium_falciparum_3D7 | gene_product=deoxyuridine 5'-triphosphate nucleotidohydrolase | transcript_product=deoxyuridine 5'-triphosphate nucleotidohydrolase | location=Pf3D7_11_v3:1060262-1060783(-) | protein_length=173 | sequence_SO=chromosome | SO=protein_coding | is_pseudo=false	NaN	1	254.988	3.54988	2673-10uM	DMSO
2673-10uM / DMSO	_AAHLPAEFTPAVHASLDK_	111	Specific-N	P69905	0.431394	0.431394	4.49836e-16	1.73719e-14	162	P69905	HBA1	Hemoglobin subunit alpha	HBA_HUMAN	1	34.8536	1.34854	2673-10uM	DMSO
2673-1uM / DMSO	_TLSGLEVSMVTAVPGR_	301	Specific	P00390	0.701221	0.701221	4.72805e-16	1.82097e-14	27	P00390	GSR	Glutathione reductase, mitochondrial	GSHR_HUMAN	1	62.588	1.62588	2673-1uM	DMSO
2673-1uM / DMSO	_GLVTVLNPILLR_	744	Specific-N	transcript=PF3D7_1031600.1	-0.695066	0.695066	4.73124e-16	1.82097e-14	54	transcript=PF3D7_1031600.1	NaN	gene=PF3D7_1031600 | organism=Plasmodium_falciparum_3D7 | gene_product=conserved Plasmodium protein, unknown function | transcript_product=conserved Plasmodium protein, unknown function | location=Pf3D7_10_v3:1275863-1278577(+) | protein_length=904 | sequence_SO=chromosome | SO=protein_coding | is_pseudo=false	NaN	1	-38.2319	0.617681	2673-1uM	DMSO
2673-1uM / DMSO	_EASLFLVDLIK_	66	Specific	transcript=PF3D7_1106000.1	0.246858	0.246858	4.80567e-16	1.84651e-14	54	transcript=PF3D7_1106000.1	NaN	gene=PF3D7_1106000 | organism=Plasmodium_falciparum_3D7 | gene_product=RuvB-like helicase 2 | transcript_product=RuvB-like helicase 2 | location=Pf3D7_11_v3:255714-257141(-) | protein_length=475 | sequence_SO=chromosome | SO=protein_coding | is_pseudo=false	NaN	1	18.662	1.18662	2673-1uM	DMSO
2673-1uM / DMSO	_NIHEEILTPALNK_	231	Specific-N	transcript=PF3D7_0317000.1	-0.306825	0.306825	4.83841e-16	1.85597e-14	108	transcript=PF3D7_0317000.1	NaN	gene=PF3D7_0317000 | organism=Plasmodium_falciparum_3D7 | gene_product=proteasome subunit alpha type-3, putative | transcript_product=proteasome subunit alpha type-3, putative | location=Pf3D7_03_v3:682795-683685(-) | protein_length=252 | sequence_SO=chromosome | SO=protein_coding | is_pseudo=false	NaN	1	-19.1581	0.808419	2673-1uM	DMSO
2673-10uM / DMSO	_VELPLTC[Carbamidomethyl (C)]PELY_	154	Unspecific	transcript=PF3D7_0413600.1	1.10195	1.10195	4.88355e-16	1.87015e-14	36	transcript=PF3D7_0413600.1	NaN	gene=PF3D7_0413600 | organism=Plasmodium_falciparum_3D7 | gene_product=26S protease regulatory subunit 6B, putative | transcript_product=26S protease regulatory subunit 6B, putative | location=Pf3D7_04_v3:616914-618350(-) | protein_length=392 | sequence_SO=chromosome | SO=protein_coding | is_pseudo=false	NaN	1	114.644	2.14644	2673-10uM	DMSO
2673-1uM / DMSO	_LNLVAVSDFNVGAMENK_	449	Specific	transcript=PF3D7_1311800.1	1.1717	1.1717	5.15686e-16	1.97151e-14	45	transcript=PF3D7_1311800.1	NaN	gene=PF3D7_1311800 | organism=Plasmodium_falciparum_3D7 | gene_product=M1-family alanyl aminopeptidase | transcript_product=M1-family alanyl aminopeptidase | location=Pf3D7_13_v3:501790-505047(+) | protein_length=1085 | sequence_SO=chromosome | SO=protein_coding | is_pseudo=false	NaN	1	125.277	2.25277	2673-1uM	DMSO
2673-10uM / DMSO	_GILPYLGPDGK_	164	Specific-N	transcript=PF3D7_0922200.1	-0.198533	0.198533	5.39782e-16	2.06018e-14	54	transcript=PF3D7_0922200.1	NaN	gene=PF3D7_0922200 | organism=Plasmodium_falciparum_3D7 | gene_product=S-adenosylmethionine synthetase | transcript_product=S-adenosylmethionine synthetase | location=Pf3D7_09_v3:903362-904570(+) | protein_length=402 | sequence_SO=chromosome | SO=protein_coding | is_pseudo=false	NaN	1	-12.8564	0.871436	2673-10uM	DMSO
2673-1uM / DMSO	_LELDYMDIEAMK_	79	Specific	transcript=PF3D7_1441200.1	0.545038	0.545038	5.53094e-16	2.10747e-14	54	transcript=PF3D7_1441200.1	NaN	gene=PF3D7_1441200 | organism=Plasmodium_falciparum_3D7 | gene_product=60S ribosomal protein L1, putative | transcript_product=60S ribosomal protein L1, putative | location=Pf3D7_14_v3:1678662-1679486(+) | protein_length=217 | sequence_SO=chromosome | SO=protein_coding | is_pseudo=false	NaN	1	45.9059	1.45906	2673-1uM	DMSO
2673-1uM / DMSO	_SNIVNTSFLLFPR_	79	Specific	transcript=PF3D7_1127100.1	0.569573	0.569573	5.57418e-16	2.12041e-14	54	transcript=PF3D7_1127100.1	NaN	gene=PF3D7_1127100 | organism=Plasmodium_falciparum_3D7 | gene_product=deoxyuridine 5'-triphosphate nucleotidohydrolase | transcript_product=deoxyuridine 5'-triphosphate nucleotidohydrolase | location=Pf3D7_11_v3:1060262-1060783(-) | protein_length=173 | sequence_SO=chromosome | SO=protein_coding | is_pseudo=false	NaN	1	48.4085	1.48408	2673-1uM	DMSO
2673-10uM / DMSO	_YLC[Carbamidomethyl (C)]SLSDSEVYHFAK_	175	Specific	transcript=PF3D7_0621200.1	0.476263	0.476263	5.61234e-16	2.13139e-14	81	transcript=PF3D7_0621200.1	NaN	gene=PF3D7_0621200 | organism=Plasmodium_falciparum_3D7 | gene_product=pyridoxine biosynthesis protein PDX1 | transcript_product=pyridoxine biosynthesis protein PDX1 | location=Pf3D7_06_v3:871297-872202(-) | protein_length=301 | sequence_SO=chromosome | SO=protein_coding | is_pseudo=false	NaN	1	39.1136	1.39114	2673-10uM	DMSO
2673-1uM / DMSO	_VNVDEVGGEALGR_	19	Specific	P68871	0.580658	0.580658	5.66514e-16	2.14787e-14	81	P68871	HBB	Hemoglobin subunit beta	HBB_HUMAN	1	49.5532	1.49553	2673-1uM	DMSO
2673-10uM / DMSO	_NWEDFLHID_	308	Unspecific	transcript=PF3D7_0607000.1	0.928491	0.928491	5.68139e-16	2.15046e-14	36	transcript=PF3D7_0607000.1	NaN	gene=PF3D7_0607000 | organism=Plasmodium_falciparum_3D7 | gene_product=translation initiation factor IF-2, putative | transcript_product=translation initiation factor IF-2, putative | location=Pf3D7_06_v3:293864-296797(+) | protein_length=977 | sequence_SO=chromosome | SO=protein_coding | is_pseudo=false	NaN	1	90.3285	1.90328	2673-10uM	DMSO
2673-10uM / DMSO	_NTNFNLGDDINFVK_	190	Specific	transcript=PF3D7_0518300.1	0.87338	0.87338	5.89386e-16	2.2272e-14	54	transcript=PF3D7_0518300.1	NaN	gene=PF3D7_0518300 | organism=Plasmodium_falciparum_3D7 | gene_product=proteasome subunit beta type-1, putative | transcript_product=proteasome subunit beta type-1, putative | location=Pf3D7_05_v3:759831-760998(-) | protein_length=240 | sequence_SO=chromosome | SO=protein_coding | is_pseudo=false	NaN	1	83.195	1.83195	2673-10uM	DMSO
2673-10uM / DMSO	_LPDC[Carbamidomethyl (C)]ANSPHLVMA_	396	Specific-C	transcript=PF3D7_0922600.1	-0.484094	0.484094	5.94106e-16	2.24133e-14	45	transcript=PF3D7_0922600.1	NaN	gene=PF3D7_0922600 | organism=Plasmodium_falciparum_3D7 | gene_product=glutamine synthetase, putative | transcript_product=glutamine synthetase, putative | location=Pf3D7_09_v3:916603-918674(+) | protein_length=543 | sequence_SO=chromosome | SO=protein_coding | is_pseudo=false	NaN	1	-28.5054	0.714946	2673-10uM	DMSO
2673-10uM / DMSO	_IPISDNVDPNVLK_	959	Specific-N	transcript=PF3D7_0529400.1	-0.485246	0.485246	5.96232e-16	2.24564e-14	36	transcript=PF3D7_0529400.1	NaN	gene=PF3D7_0529400 | organism=Plasmodium_falciparum_3D7 | gene_product=conserved Plasmodium protein, unknown function | transcript_product=conserved Plasmodium protein, unknown function | location=Pf3D7_05_v3:1199165-1205187(+) | protein_length=1582 | sequence_SO=chromosome | SO=protein_coding | is_pseudo=false	NaN	1	-28.5625	0.714375	2673-10uM	DMSO
2673-1uM / DMSO	_EQITPVVL_	13	Specific-C	transcript=PF3D7_0513300.1	-0.870442	0.870442	5.97436e-16	2.24648e-14	81	transcript=PF3D7_0513300.1	NaN	gene=PF3D7_0513300 | organism=Plasmodium_falciparum_3D7 | gene_product=purine nucleoside phosphorylase | transcript_product=purine nucleoside phosphorylase | location=Pf3D7_05_v3:569182-569919(-) | protein_length=245 | sequence_SO=chromosome | SO=protein_coding | is_pseudo=false	NaN	1	-45.3021	0.546979	2673-1uM	DMSO
2673-10uM / DMSO	_NSYRPGDIITA_	437	Specific-C	transcript=PF3D7_1446200.1	0.419679	0.419679	6.02819e-16	2.263e-14	36	transcript=PF3D7_1446200.1	NaN	gene=PF3D7_1446200 | organism=Plasmodium_falciparum_3D7 | gene_product=M17 leucyl aminopeptidase | transcript_product=M17 leucyl aminopeptidase | location=Pf3D7_14_v3:1893200-1895017(-) | protein_length=605 | sequence_SO=chromosome | SO=protein_coding | is_pseudo=false	NaN	1	33.763	1.33763	2673-10uM	DMSO
2673-10uM / DMSO	_NDLFEFLK_	96	Specific	transcript=PF3D7_1205600.1	-0.869302	0.869302	6.30917e-16	2.36459e-14	54	transcript=PF3D7_1205600.1	NaN	gene=PF3D7_1205600 | organism=Plasmodium_falciparum_3D7 | gene_product=tetratricopeptide repeat protein, putative | transcript_product=tetratricopeptide repeat protein, putative | location=Pf3D7_12_v3:249336-251399(-) | protein_length=333 | sequence_SO=chromosome | SO=protein_coding | is_pseudo=false	NaN	1	-45.2588	0.547412	2673-10uM	DMSO
2673-1uM / DMSO	_DLDHC[Carbamidomethyl (C)]C[Carbamidomethyl (C)]LVNDEGKK_	211	Specific	transcript=PF3D7_1012400.1	0.742317	0.742317	6.37423e-16	2.38507e-14	72	transcript=PF3D7_1012400.1	NaN	gene=PF3D7_1012400 | organism=Plasmodium_falciparum_3D7 | gene_product=hypoxanthine-guanine phosphoribosyltransferase | transcript_product=hypoxanthine-guanine phosphoribosyltransferase | location=Pf3D7_10_v3:475327-476563(-) | protein_length=231 | sequence_SO=chromosome | SO=protein_coding | is_pseudo=false	NaN	1	67.286	1.67286	2673-1uM	DMSO
2673-10uM / DMSO	_NHESVSPSVIY_	278	Specific-C	transcript=PF3D7_0511800.1	-0.498137	0.498137	6.47876e-16	2.42022e-14	54	transcript=PF3D7_0511800.1	NaN	gene=PF3D7_0511800 | organism=Plasmodium_falciparum_3D7 | gene_product=inositol-3-phosphate synthase | transcript_product=inositol-3-phosphate synthase | location=Pf3D7_05_v3:520720-522693(-) | protein_length=604 | sequence_SO=chromosome | SO=protein_coding | is_pseudo=false	NaN	1	-29.198	0.70802	2673-10uM	DMSO
2673-10uM / DMSO	_FSTVAGESGSADTVR_	113	Specific	P04040	1.42763	1.42763	6.49501e-16	2.42233e-14	27	P04040	CAT	Catalase	CATA_HUMAN	1	169.005	2.69005	2673-10uM	DMSO
2673-1uM / DMSO	_KLLDFSLLTNQEIK_	720	Specific	transcript=PF3D7_1454400.1	0.474501	0.474501	6.68272e-16	2.48828e-14	99	transcript=PF3D7_1454400.1	NaN	gene=PF3D7_1454400 | organism=Plasmodium_falciparum_3D7 | gene_product=aminopeptidase P | transcript_product=aminopeptidase P | location=Pf3D7_14_v3:2234143-2236476(+) | protein_length=777 | sequence_SO=chromosome | SO=protein_coding | is_pseudo=false	NaN	1	38.9437	1.38944	2673-1uM	DMSO
2673-10uM / DMSO	_GAQLVDLYIDLVK_	284	Specific-N	transcript=PF3D7_1015900.1	-0.860962	0.860962	6.71764e-16	2.49722e-14	81	transcript=PF3D7_1015900.1	NaN	gene=PF3D7_1015900 | organism=Plasmodium_falciparum_3D7 | gene_product=enolase | transcript_product=enolase | location=Pf3D7_10_v3:637138-639011(+) | protein_length=446 | sequence_SO=chromosome | SO=protein_coding | is_pseudo=false	NaN	1	-44.9415	0.550585	2673-10uM	DMSO
2673-10uM / DMSO	_SIDNYGNLIETK_	393	Specific-N	transcript=PF3D7_1402300.1	-0.750736	0.750736	6.83065e-16	2.5351e-14	45	transcript=PF3D7_1402300.1	NaN	gene=PF3D7_1402300 | organism=Plasmodium_falciparum_3D7 | gene_product=26S proteasome regulatory subunit RPN6 | transcript_product=26S proteasome regulatory subunit RPN6 | location=Pf3D7_14_v3:85883-87883(-) | protein_length=666 | sequence_SO=chromosome | SO=protein_coding | is_pseudo=false	NaN	1	-40.57	0.5943	2673-10uM	DMSO
2673-10uM / DMSO	_VTNGAFTGEISPGMIK_	107	Specific	P60174	0.62033	0.62033	6.9765e-16	2.58504e-14	54	P60174	TPI1	Triosephosphate isomerase	TPIS_HUMAN	1	53.7227	1.53723	2673-10uM	DMSO
2673-1uM / DMSO	_FSPYFVNPIVVGFK_	102	Specific	transcript=PF3D7_0108000.1	1.19819	1.19819	7.2292e-16	2.67434e-14	54	transcript=PF3D7_0108000.1	NaN	gene=PF3D7_0108000 | organism=Plasmodium_falciparum_3D7 | gene_product=proteasome subunit beta type-3, putative | transcript_product=proteasome subunit beta type-3, putative | location=Pf3D7_01_v3:328431-329558(-) | protein_length=218 | sequence_SO=chromosome | SO=protein_coding | is_pseudo=false	NaN	1	129.451	2.29451	2673-1uM	DMSO
2673-10uM / DMSO	_FILTSDDHMNK_	199	Specific	transcript=PF3D7_0317000.1	0.639998	0.639998	7.36038e-16	2.71847e-14	81	transcript=PF3D7_0317000.1	NaN	gene=PF3D7_0317000 | organism=Plasmodium_falciparum_3D7 | gene_product=proteasome subunit alpha type-3, putative | transcript_product=proteasome subunit alpha type-3, putative | location=Pf3D7_03_v3:682795-683685(-) | protein_length=252 | sequence_SO=chromosome | SO=protein_coding | is_pseudo=false	NaN	1	55.8327	1.55833	2673-10uM	DMSO
2673-10uM / DMSO	_ALLTPQPLK_	663	Specific	transcript=PF3D7_0607000.1	0.422033	0.422033	7.49197e-16	2.7626e-14	45	transcript=PF3D7_0607000.1	NaN	gene=PF3D7_0607000 | organism=Plasmodium_falciparum_3D7 | gene_product=translation initiation factor IF-2, putative | transcript_product=translation initiation factor IF-2, putative | location=Pf3D7_06_v3:293864-296797(+) | protein_length=977 | sequence_SO=chromosome | SO=protein_coding | is_pseudo=false	NaN	1	33.9814	1.33981	2673-10uM	DMSO
2673-1uM / DMSO	_IVLVGSGMIGGVM_	7	Specific-C	transcript=PF3D7_1324900.1	0.428753	0.428753	7.80493e-16	2.87337e-14	54	transcript=PF3D7_1324900.1	NaN	gene=PF3D7_1324900 | organism=Plasmodium_falciparum_3D7 | gene_product=L-lactate dehydrogenase | transcript_product=L-lactate dehydrogenase | location=Pf3D7_13_v3:1041157-1042107(+) | protein_length=316 | sequence_SO=chromosome | SO=protein_coding | is_pseudo=false	NaN	1	34.6069	1.34607	2673-1uM	DMSO
2673-1uM / DMSO	_VLGVNIASLNK_	67	Specific	transcript=PF3D7_1361900.1	0.957265	0.957265	7.84466e-16	2.88335e-14	45	transcript=PF3D7_1361900.1	NaN	gene=PF3D7_1361900 | organism=Plasmodium_falciparum_3D7 | gene_product=proliferating cell nuclear antigen 1 | transcript_product=proliferating cell nuclear antigen 1 | location=Pf3D7_13_v3:2482472-2483296(-) | protein_length=274 | sequence_SO=chromosome | SO=protein_coding | is_pseudo=false	NaN	1	94.1626	1.94163	2673-1uM	DMSO
2673-1uM / DMSO	_SGVDEKPMIEVTYQGEK_	107	Specific	transcript=PF3D7_0818900.1	0.433859	0.433859	8.13719e-16	2.98608e-14	108	transcript=PF3D7_0818900.1	NaN	gene=PF3D7_0818900 | organism=Plasmodium_falciparum_3D7 | gene_product=heat shock protein 70 | transcript_product=heat shock protein 70 | location=Pf3D7_08_v3:860384-862417(+) | protein_length=677 | sequence_SO=chromosome | SO=protein_coding | is_pseudo=false	NaN	1	35.0842	1.35084	2673-1uM	DMSO
2673-1uM / DMSO	_LQEIAQESPPGSMPR_	295	Specific	transcript=PF3D7_1355100.1	0.681583	0.681583	8.17418e-16	2.99484e-14	45	transcript=PF3D7_1355100.1	NaN	gene=PF3D7_1355100 | organism=Plasmodium_falciparum_3D7 | gene_product=DNA replication licensing factor MCM6 | transcript_product=DNA replication licensing factor MCM6 | location=Pf3D7_13_v3:2187435-2190224(+) | protein_length=929 | sequence_SO=chromosome | SO=protein_coding | is_pseudo=false	NaN	1	60.3899	1.6039	2673-1uM	DMSO
2673-10uM / DMSO	_LWNTLAQC[Carbamidomethyl (C)]K_	140	Specific	transcript=PF3D7_0826700.1	0.949846	0.949846	8.22687e-16	3.00932e-14	54	transcript=PF3D7_0826700.1	NaN	gene=PF3D7_0826700 | organism=Plasmodium_falciparum_3D7 | gene_product=receptor for activated c kinase | transcript_product=receptor for activated c kinase | location=Pf3D7_08_v3:1160164-1161708(-) | protein_length=323 | sequence_SO=chromosome | SO=protein_coding | is_pseudo=false	NaN	1	93.1667	1.93167	2673-10uM	DMSO
2673-1uM / DMSO	_LYTVEYLSNMVGGR_	283	Specific	Q13867	0.567139	0.567139	8.25463e-16	3.01465e-14	45	Q13867	BLMH	Bleomycin hydrolase	BLMH_HUMAN	1	48.1582	1.48158	2673-1uM	DMSO
2673-1uM / DMSO	_ADGYIIEGDELLFYK_	195	Specific	transcript=PF3D7_1408600.1	0.528188	0.528188	8.33198e-16	3.03805e-14	54	transcript=PF3D7_1408600.1	NaN	gene=PF3D7_1408600 | organism=Plasmodium_falciparum_3D7 | gene_product=40S ribosomal protein S8e, putative | transcript_product=40S ribosomal protein S8e, putative | location=Pf3D7_14_v3:323317-324172(+) | protein_length=218 | sequence_SO=chromosome | SO=protein_coding | is_pseudo=false	NaN	1	44.2117	1.44212	2673-1uM	DMSO
2673-10uM / DMSO	_VINIKPVTF_	149	Unspecific	transcript=PF3D7_1309300.1	0.880156	0.880156	8.38952e-16	3.05416e-14	36	transcript=PF3D7_1309300.1	NaN	gene=PF3D7_1309300 | organism=Plasmodium_falciparum_3D7 | gene_product=U4/U6 small nuclear ribonucleoprotein PRP3, putative | transcript_product=U4/U6 small nuclear ribonucleoprotein PRP3, putative | location=Pf3D7_13_v3:427457-429643(-) | protein_length=728 | sequence_SO=chromosome | SO=protein_coding | is_pseudo=false	NaN	1	84.0575	1.84057	2673-10uM	DMSO
2673-10uM / DMSO	_AAHLPAEFTPA_	111	Unspecific	P69905	-0.449507	0.449507	8.82671e-16	3.20821e-14	54	P69905	HBA1	Hemoglobin subunit alpha	HBA_HUMAN	1	-26.7707	0.732293	2673-10uM	DMSO
2673-10uM / DMSO	_GSTGFGQDSILSLPGNVGHQDVK_	539;539	Specific	C9JIF9;P13798	0.716964	0.716964	8.95789e-16	3.25072e-14	54	C9JIF9;P13798	APEH	Acylamino-acid-releasing enzyme	C9JIF9_HUMAN;ACPH_HUMAN	1	64.3719	1.64372	2673-10uM	DMSO
2673-10uM / DMSO	_LQETC[Carbamidomethyl (C)]NAINIALNK_	342	Specific	transcript=PF3D7_1235600.1	0.867249	0.867249	9.23362e-16	3.34547e-14	54	transcript=PF3D7_1235600.1	NaN	gene=PF3D7_1235600 | organism=Plasmodium_falciparum_3D7 | gene_product=serine hydroxymethyltransferase | transcript_product=serine hydroxymethyltransferase | location=Pf3D7_12_v3:1484306-1485911(+) | protein_length=442 | sequence_SO=chromosome | SO=protein_coding | is_pseudo=false	NaN	1	82.4181	1.82418	2673-10uM	DMSO
2673-10uM / DMSO	_IHPNYAGPIVEGV_	883	Specific-C	transcript=PF3D7_1355100.1	0.256888	0.256888	9.64836e-16	3.4902e-14	36	transcript=PF3D7_1355100.1	NaN	gene=PF3D7_1355100 | organism=Plasmodium_falciparum_3D7 | gene_product=DNA replication licensing factor MCM6 | transcript_product=DNA replication licensing factor MCM6 | location=Pf3D7_13_v3:2187435-2190224(+) | protein_length=929 | sequence_SO=chromosome | SO=protein_coding | is_pseudo=false	NaN	1	19.4898	1.1949	2673-10uM	DMSO
2673-1uM / DMSO	_IAPFYEEC[Carbamidomethyl (C)]SK_	36	Specific	transcript=PF3D7_1457200.1	0.799682	0.799682	9.95014e-16	3.59368e-14	54	transcript=PF3D7_1457200.1	NaN	gene=PF3D7_1457200 | organism=Plasmodium_falciparum_3D7 | gene_product=thioredoxin 1 | transcript_product=thioredoxin 1 | location=Pf3D7_14_v3:2343640-2344218(-) | protein_length=104 | sequence_SO=chromosome | SO=protein_coding | is_pseudo=false	NaN	1	74.0717	1.74072	2673-1uM	DMSO
2673-1uM / DMSO	_IQVGLLC[Carbamidomethyl (C)]TGDGGLSHER_	167	Specific	transcript=PF3D7_1029600.1	1.28242	1.28242	9.99053e-16	3.60258e-14	108	transcript=PF3D7_1029600.1	NaN	gene=PF3D7_1029600 | organism=Plasmodium_falciparum_3D7 | gene_product=adenosine deaminase | transcript_product=adenosine deaminase | location=Pf3D7_10_v3:1206302-1207405(+) | protein_length=367 | sequence_SO=chromosome | SO=protein_coding | is_pseudo=false	NaN	1	143.246	2.43246	2673-1uM	DMSO
2673-10uM / DMSO	_SPPDQPAVPHPPPSTPIKL_	600	Specific-C	P35611	1.29576	1.29576	1.01094e-15	3.63399e-14	45	P35611	ADD1	Alpha-adducin	ADDA_HUMAN	1	145.506	2.45506	2673-10uM	DMSO
2673-10uM / DMSO	_SFDILKIL_	991	Unspecific	transcript=PF3D7_0725100.1	-0.899825	0.899825	1.01032e-15	3.63399e-14	54	transcript=PF3D7_0725100.1	NaN	gene=PF3D7_0725100 | organism=Plasmodium_falciparum_3D7 | gene_product=conserved Plasmodium membrane protein, unknown function | transcript_product=conserved Plasmodium membrane protein, unknown function | location=Pf3D7_07_v3:1065252-1070240(+) | protein_length=1576 | sequence_SO=chromosome | SO=protein_coding | is_pseudo=false	NaN	1	-46.4048	0.535952	2673-10uM	DMSO
2673-10uM / DMSO	_EEEINIDDEIQK_	794	Specific-N	transcript=PF3D7_1222300.1	0.523005	0.523005	1.02054e-15	3.66272e-14	45	transcript=PF3D7_1222300.1	NaN	gene=PF3D7_1222300 | organism=Plasmodium_falciparum_3D7 | gene_product=endoplasmin, putative | transcript_product=endoplasmin, putative | location=Pf3D7_12_v3:883567-886032(-) | protein_length=821 | sequence_SO=chromosome | SO=protein_coding | is_pseudo=false	NaN	1	43.6945	1.43695	2673-10uM	DMSO
2673-1uM / DMSO	_AGTISGIFSK_	202	Specific	transcript=PF3D7_1408100.1	1.57169	1.57169	1.02603e-15	3.67667e-14	36	transcript=PF3D7_1408100.1	NaN	gene=PF3D7_1408100 | organism=Plasmodium_falciparum_3D7 | gene_product=plasmepsin III | transcript_product=plasmepsin III | location=Pf3D7_14_v3:297468-298823(+) | protein_length=451 | sequence_SO=chromosome | SO=protein_coding | is_pseudo=false	NaN	1	197.253	2.97253	2673-1uM	DMSO
2673-10uM / DMSO	_KEQITPVVLVVGDPGR_	12	Specific-N	transcript=PF3D7_0513300.1	0.325171	0.325171	1.04584e-15	3.7418e-14	108	transcript=PF3D7_0513300.1	NaN	gene=PF3D7_0513300 | organism=Plasmodium_falciparum_3D7 | gene_product=purine nucleoside phosphorylase | transcript_product=purine nucleoside phosphorylase | location=Pf3D7_05_v3:569182-569919(-) | protein_length=245 | sequence_SO=chromosome | SO=protein_coding | is_pseudo=false	NaN	1	25.2813	1.25281	2673-10uM	DMSO
2673-1uM / DMSO	_VAPAAAIIEM[Oxidation (M)]AESYLK_	237	Specific-N	transcript=PF3D7_1324900.1	0.38241	0.38241	1.07706e-15	3.84747e-14	108	transcript=PF3D7_1324900.1	NaN	gene=PF3D7_1324900 | organism=Plasmodium_falciparum_3D7 | gene_product=L-lactate dehydrogenase | transcript_product=L-lactate dehydrogenase | location=Pf3D7_13_v3:1041157-1042107(+) | protein_length=316 | sequence_SO=chromosome | SO=protein_coding | is_pseudo=false	NaN	1	30.3518	1.30352	2673-1uM	DMSO
2673-1uM / DMSO	_TLSDYNIQ_	55,131,207,283,359;55	Specific-C	transcript=PF3D7_1211800.1;transcript=PF3D7_1365900.1	-0.580115	0.580115	1.0821e-15	3.85943e-14	45	transcript=PF3D7_1211800.1;transcript=PF3D7_1365900.1	NaN	gene=PF3D7_1211800 | organism=Plasmodium_falciparum_3D7 | gene_product=polyubiquitin | transcript_product=polyubiquitin | location=Pf3D7_12_v3:526109-527780(+) | protein_length=381 | sequence_SO=chromosome | SO=protein_coding | is_pseudo=false;gene=PF3D7_1365900 | organism=Plasmodium_falciparum_3D7 | gene_product=ubiquitin-60S ribosomal protein L40 | transcript_product=ubiquitin-60S ribosomal pro…	NaN	1	-33.109	0.66891	2673-1uM	DMSO
2673-10uM / DMSO	_SFAFFTR_	80	Specific	transcript=PF3D7_1470900.1	0.602634	0.602634	1.12359e-15	4.00118e-14	36	transcript=PF3D7_1470900.1	NaN	gene=PF3D7_1470900 | organism=Plasmodium_falciparum_3D7 | gene_product=proteasome subunit beta type-2, putative | transcript_product=proteasome subunit beta type-2, putative | location=Pf3D7_14_v3:2897916-2898657(+) | protein_length=195 | sequence_SO=chromosome | SO=protein_coding | is_pseudo=false	NaN	1	51.8486	1.51849	2673-10uM	DMSO
2673-10uM / DMSO	_TYFPHFDLSHGSAQVK_	42	Specific	P69905	0.878051	0.878051	1.17161e-15	4.16568e-14	153	P69905	HBA1	Hemoglobin subunit alpha	HBA_HUMAN	1	83.789	1.83789	2673-10uM	DMSO
2673-10uM / DMSO	_MVTAVASALSSR_	134	Specific	P69891	1.13986	1.13986	1.19553e-15	4.24413e-14	36	P69891	HBG1	Hemoglobin subunit gamma-1	HBG1_HUMAN	1	120.36	2.2036	2673-10uM	DMSO
2673-10uM / DMSO	_INTIYPLLK_	332	Specific	transcript=PF3D7_1134800.1	0.546422	0.546422	1.20492e-15	4.27082e-14	45	transcript=PF3D7_1134800.1	NaN	gene=PF3D7_1134800 | organism=Plasmodium_falciparum_3D7 | gene_product=coatomer subunit delta | transcript_product=coatomer subunit delta | location=Pf3D7_11_v3:1367186-1368809(+) | protein_length=487 | sequence_SO=chromosome | SO=protein_coding | is_pseudo=false	NaN	1	46.0459	1.46046	2673-10uM	DMSO
2673-10uM / DMSO	_IVEEEPSRVEEVLGK_	2470	Specific	transcript=PF3D7_1149000.1	-0.69209	0.69209	1.20886e-15	4.27818e-14	72	transcript=PF3D7_1149000.1	NaN	gene=PF3D7_1149000 | organism=Plasmodium_falciparum_3D7 | gene_product=antigen 332, DBL-like protein | transcript_product=antigen 332, DBL-like protein | location=Pf3D7_11_v3:1950210-1968726(+) | protein_length=6093 | sequence_SO=chromosome | SO=protein_coding | is_pseudo=false	NaN	1	-38.1043	0.618957	2673-10uM	DMSO
2673-1uM / DMSO	_IPLNDFFNK_	176	Specific-N	transcript=PF3D7_0914300.1	-0.251373	0.251373	1.23992e-15	4.38131e-14	54	transcript=PF3D7_0914300.1	NaN	gene=PF3D7_0914300 | organism=Plasmodium_falciparum_3D7 | gene_product=met-10+ like protein, putative | transcript_product=met-10+ like protein, putative | location=Pf3D7_09_v3:612976-615492(-) | protein_length=781 | sequence_SO=chromosome | SO=protein_coding | is_pseudo=false	NaN	1	-15.9903	0.840097	2673-1uM	DMSO
2673-10uM / DMSO	_C[Carbamidomethyl (C)]INSIDMINLTK_	328	Specific	transcript=PF3D7_1354500.1	0.668616	0.668616	1.26018e-15	4.44603e-14	54	transcript=PF3D7_1354500.1	NaN	gene=PF3D7_1354500 | organism=Plasmodium_falciparum_3D7 | gene_product=adenylosuccinate synthetase | transcript_product=adenylosuccinate synthetase | location=Pf3D7_13_v3:2174346-2175797(+) | protein_length=442 | sequence_SO=chromosome | SO=protein_coding | is_pseudo=false	NaN	1	58.9548	1.58955	2673-10uM	DMSO
2673-1uM / DMSO	_VYNNEEFHIL_	64	Specific-C	transcript=PF3D7_1012400.1	-0.415054	0.415054	1.26494e-15	4.45593e-14	54	transcript=PF3D7_1012400.1	NaN	gene=PF3D7_1012400 | organism=Plasmodium_falciparum_3D7 | gene_product=hypoxanthine-guanine phosphoribosyltransferase | transcript_product=hypoxanthine-guanine phosphoribosyltransferase | location=Pf3D7_10_v3:475327-476563(-) | protein_length=231 | sequence_SO=chromosome | SO=protein_coding | is_pseudo=false	NaN	1	-25.0009	0.749991	2673-1uM	DMSO
2673-1uM / DMSO	_DNPEDGPLGLLSEC[Carbamidomethyl (C)]VK_	12	Specific	transcript=PF3D7_0218500.1	0.801422	0.801422	1.31241e-15	4.61604e-14	36	transcript=PF3D7_0218500.1	NaN	gene=PF3D7_0218500 | organism=Plasmodium_falciparum_3D7 | gene_product=small nuclear ribonucleoprotein Sm D2, putative | transcript_product=small nuclear ribonucleoprotein Sm D2, putative | location=Pf3D7_02_v3:752966-753439(+) | protein_length=101 | sequence_SO=chromosome | SO=protein_coding | is_pseudo=false	NaN	1	74.2818	1.74282	2673-1uM	DMSO
2673-10uM / DMSO	_DYLLNLPIEK_	491	Specific	transcript=PF3D7_0217100.1	-0.627842	0.627842	1.32491e-15	4.65287e-14	36	transcript=PF3D7_0217100.1	NaN	gene=PF3D7_0217100 | organism=Plasmodium_falciparum_3D7 | gene_product=ATP synthase subunit alpha, mitochondrial | transcript_product=ATP synthase subunit alpha, mitochondrial | location=Pf3D7_02_v3:707738-709393(+) | protein_length=551 | sequence_SO=chromosome | SO=protein_coding | is_pseudo=false	NaN	1	-35.2857	0.647143	2673-10uM	DMSO
2673-1uM / DMSO	_NLIQDAIC[Carbamidomethyl (C)]LAK_	347	Specific	transcript=PF3D7_1412800.1	0.570438	0.570438	1.33881e-15	4.69446e-14	54	transcript=PF3D7_1412800.1	NaN	gene=PF3D7_1412800 | organism=Plasmodium_falciparum_3D7 | gene_product=glycylpeptide N-tetradecanoyltransferase | transcript_product=glycylpeptide N-tetradecanoyltransferase | location=Pf3D7_14_v3:516574-518193(-) | protein_length=410 | sequence_SO=chromosome | SO=protein_coding | is_pseudo=false	NaN	1	48.4974	1.48497	2673-1uM	DMSO
2673-10uM / DMSO	_SVSFSNNAELYEYIK_	3	Specific	transcript=PF3D7_0922600.1	0.970362	0.970362	1.3823e-15	4.83952e-14	36	transcript=PF3D7_0922600.1	NaN	gene=PF3D7_0922600 | organism=Plasmodium_falciparum_3D7 | gene_product=glutamine synthetase, putative | transcript_product=glutamine synthetase, putative | location=Pf3D7_09_v3:916603-918674(+) | protein_length=543 | sequence_SO=chromosome | SO=protein_coding | is_pseudo=false	NaN	1	95.9333	1.95933	2673-10uM	DMSO
2673-10uM / DMSO	_THSANGSLEVSDIVK_	622	Specific-N	transcript=PF3D7_0930300.1	-0.760641	0.760641	1.38512e-15	4.842e-14	54	transcript=PF3D7_0930300.1	NaN	gene=PF3D7_0930300 | organism=Plasmodium_falciparum_3D7 | gene_product=merozoite surface protein 1 | transcript_product=merozoite surface protein 1 | location=Pf3D7_09_v3:1201812-1206974(+) | protein_length=1720 | sequence_SO=chromosome | SO=protein_coding | is_pseudo=false	NaN	1	-40.9766	0.590234	2673-10uM	DMSO
2673-10uM / DMSO	_AIC[Carbamidomethyl (C)]TAWNVLK_	63	Specific	transcript=PF3D7_1120100.1	0.799136	0.799136	1.39908e-15	4.88334e-14	54	transcript=PF3D7_1120100.1	NaN	gene=PF3D7_1120100 | organism=Plasmodium_falciparum_3D7 | gene_product=phosphoglycerate mutase, putative | transcript_product=phosphoglycerate mutase, putative | location=Pf3D7_11_v3:761695-762818(+) | protein_length=250 | sequence_SO=chromosome | SO=protein_coding | is_pseudo=false	NaN	1	74.0059	1.74006	2673-10uM	DMSO
2673-10uM / DMSO	_NDLPNLIVK_	871	Specific-N	transcript=PF3D7_1219100.1	1.15296	1.15296	1.42101e-15	4.95232e-14	27	transcript=PF3D7_1219100.1	NaN	gene=PF3D7_1219100 | organism=Plasmodium_falciparum_3D7 | gene_product=clathrin heavy chain, putative | transcript_product=clathrin heavy chain, putative | location=Pf3D7_12_v3:757649-763642(+) | protein_length=1997 | sequence_SO=chromosome | SO=protein_coding | is_pseudo=false	NaN	1	122.369	2.22369	2673-10uM	DMSO
2673-10uM / DMSO	_SQPLLGLIL_	1126	Unspecific	transcript=PF3D7_0910100.1	-0.734333	0.734333	1.43509e-15	4.99376e-14	81	transcript=PF3D7_0910100.1	NaN	gene=PF3D7_0910100 | organism=Plasmodium_falciparum_3D7 | gene_product=exportin-7, putative | transcript_product=exportin-7, putative | location=Pf3D7_09_v3:456959-461318(-) | protein_length=1198 | sequence_SO=chromosome | SO=protein_coding | is_pseudo=false	NaN	1	-39.8904	0.601096	2673-10uM	DMSO
2673-10uM / DMSO	_ASEIEVAIVSTK_	226	Specific	transcript=PF3D7_0807500.1	1.97381	1.97381	1.44518e-15	5.02125e-14	45	transcript=PF3D7_0807500.1	NaN	gene=PF3D7_0807500 | organism=Plasmodium_falciparum_3D7 | gene_product=proteasome subunit alpha type-6, putative | transcript_product=proteasome subunit alpha type-6, putative | location=Pf3D7_08_v3:387219-388364(+) | protein_length=260 | sequence_SO=chromosome | SO=protein_coding | is_pseudo=false	NaN	1	292.803	3.92803	2673-10uM	DMSO
2673-10uM / DMSO	_AINQGGLTSVAVR_	31;31	Specific	G3V5Z7;P60900	0.934617	0.934617	1.45239e-15	5.03861e-14	36	G3V5Z7;P60900	PSMA6	Proteasome subunit alpha type;Proteasome subunit alpha type-6	G3V5Z7_HUMAN;PSA6_HUMAN	1	91.1383	1.91138	2673-10uM	DMSO
2673-10uM / DMSO	_VEMNVETEHIGSVIGK_	878	Specific-N	transcript=PF3D7_1011800.1	-1.50358	1.50358	1.45587e-15	5.04303e-14	54	transcript=PF3D7_1011800.1	NaN	gene=PF3D7_1011800 | organism=Plasmodium_falciparum_3D7 | gene_product=PRE-binding protein | transcript_product=PRE-binding protein | location=Pf3D7_10_v3:455398-458817(+) | protein_length=1139 | sequence_SO=chromosome | SO=protein_coding | is_pseudo=false	NaN	1	-64.7323	0.352677	2673-10uM	DMSO
2673-10uM / DMSO	_TLPEFIQDPNAAK_	405	Specific-N	transcript=PF3D7_1104400.1	-1.02987	1.02987	1.50016e-15	5.18861e-14	54	transcript=PF3D7_1104400.1	NaN	gene=PF3D7_1104400 | organism=Plasmodium_falciparum_3D7 | gene_product=thioredoxin-like mero protein | transcript_product=thioredoxin-like mero protein | location=Pf3D7_11_v3:196767-198355(+) | protein_length=424 | sequence_SO=chromosome | SO=protein_coding | is_pseudo=false	NaN	1	-51.0245	0.489755	2673-10uM	DMSO
2673-10uM / DMSO	_EEVSGGTNLMK_	496	Specific	transcript=PF3D7_0626800.1	0.438973	0.438973	1.50523e-15	5.19827e-14	54	transcript=PF3D7_0626800.1	NaN	gene=PF3D7_0626800 | organism=Plasmodium_falciparum_3D7 | gene_product=pyruvate kinase | transcript_product=pyruvate kinase | location=Pf3D7_06_v3:1078995-1081320(+) | protein_length=511 | sequence_SO=chromosome | SO=protein_coding | is_pseudo=false	NaN	1	35.5639	1.35564	2673-10uM	DMSO
2673-10uM / DMSO	_IDNLMVEELDGSK_	90	Specific	transcript=PF3D7_1015900.1	0.948153	0.948153	1.51388e-15	5.22027e-14	54	transcript=PF3D7_1015900.1	NaN	gene=PF3D7_1015900 | organism=Plasmodium_falciparum_3D7 | gene_product=enolase | transcript_product=enolase | location=Pf3D7_10_v3:637138-639011(+) | protein_length=446 | sequence_SO=chromosome | SO=protein_coding | is_pseudo=false	NaN	1	92.9401	1.9294	2673-10uM	DMSO
2673-10uM / DMSO	_SPSDVKPLPSPDTDVPL_	119;121;89;108;76;121;56	Specific-C	A0A087WU29;A0A0C4DFT7;E7EQF3;E9PD10;E9PH25;P02724;Q13030	0.887554	0.887554	1.53038e-15	5.26246e-14	45	A0A087WU29;A0A0C4DFT7;E7EQF3;E9PD10;E9PH25;P02724;Q13030	GYPA;GYPA;GYPA;GYPA;GYPA;GYPA;GPErik	Glycophorin;Glycophorin;Glycophorin;Glycophorin;Glycophorin-A;Glycophorin-A;Glycophorin Erik I-IV	A0A087WU29_HUMAN;A0A0C4DFT7_HUMAN;E7EQF3_HUMAN;E9PD10_HUMAN;E9PH25_HUMAN;GLPA_HUMAN;Q13030_HUMAN	1	85.0037	1.85004	2673-10uM	DMSO
2673-1uM / DMSO	_ESLLNHNAIINFFK_	318	Specific	transcript=PF3D7_0827900.1	0.272718	0.272718	1.53072e-15	5.26246e-14	108	transcript=PF3D7_0827900.1	NaN	gene=PF3D7_0827900 | organism=Plasmodium_falciparum_3D7 | gene_product=protein disulfide isomerase | transcript_product=protein disulfide isomerase | location=Pf3D7_08_v3:1206788-1208394(-) | protein_length=483 | sequence_SO=chromosome | SO=protein_coding | is_pseudo=false	NaN	1	20.8082	1.20808	2673-1uM	DMSO
2673-10uM / DMSO	_ENLFSEEMTK_	526	Specific	transcript=PF3D7_1311800.1	0.335239	0.335239	1.55797e-15	5.34808e-14	54	transcript=PF3D7_1311800.1	NaN	gene=PF3D7_1311800 | organism=Plasmodium_falciparum_3D7 | gene_product=M1-family alanyl aminopeptidase | transcript_product=M1-family alanyl aminopeptidase | location=Pf3D7_13_v3:501790-505047(+) | protein_length=1085 | sequence_SO=chromosome | SO=protein_coding | is_pseudo=false	NaN	1	26.1586	1.26159	2673-10uM	DMSO
2673-10uM / DMSO	_SNLIC[Carbamidomethyl (C)]DYVR_	381	Specific	transcript=PF3D7_0511800.1	0.607455	0.607455	1.56827e-15	5.37537e-14	36	transcript=PF3D7_0511800.1	NaN	gene=PF3D7_0511800 | organism=Plasmodium_falciparum_3D7 | gene_product=inositol-3-phosphate synthase | transcript_product=inositol-3-phosphate synthase | location=Pf3D7_05_v3:520720-522693(-) | protein_length=604 | sequence_SO=chromosome | SO=protein_coding | is_pseudo=false	NaN	1	52.3569	1.52357	2673-10uM	DMSO
2673-10uM / DMSO	_EASMVITESPAALQLR_	236	Specific	P27105	1.36911	1.36911	1.57317e-15	5.3841e-14	81	P27105	STOM	Erythrocyte band 7 integral membrane protein	STOM_HUMAN	1	158.312	2.58312	2673-10uM	DMSO
2673-10uM / DMSO	_FDLSHGSAQVK_	47	Specific-N	P69905	0.322312	0.322312	1.57696e-15	5.38901e-14	99	P69905	HBA1	Hemoglobin subunit alpha	HBA_HUMAN	1	25.0333	1.25033	2673-10uM	DMSO
2673-1uM / DMSO	_LWDLSLGETIR_	98	Specific	transcript=PF3D7_0826700.1	0.362398	0.362398	1.60079e-15	5.46227e-14	54	transcript=PF3D7_0826700.1	NaN	gene=PF3D7_0826700 | organism=Plasmodium_falciparum_3D7 | gene_product=receptor for activated c kinase | transcript_product=receptor for activated c kinase | location=Pf3D7_08_v3:1160164-1161708(-) | protein_length=323 | sequence_SO=chromosome | SO=protein_coding | is_pseudo=false	NaN	1	28.5561	1.28556	2673-1uM	DMSO
2673-10uM / DMSO	_IPHFVNEQYTIQC[Carbamidomethyl (C)]K_	334	Specific	transcript=PF3D7_0404900.1	0.392366	0.392366	1.66198e-15	5.66263e-14	99	transcript=PF3D7_0404900.1	NaN	gene=PF3D7_0404900 | organism=Plasmodium_falciparum_3D7 | gene_product=6-cysteine protein P41 | transcript_product=6-cysteine protein P41 | location=Pf3D7_04_v3:267244-268380(-) | protein_length=378 | sequence_SO=chromosome | SO=protein_coding | is_pseudo=false	NaN	1	31.2544	1.31254	2673-10uM	DMSO
2673-1uM / DMSO	_TADLLHVPVVK_	73	Specific	transcript=PF3D7_1120100.1	0.498571	0.498571	1.67458e-15	5.69706e-14	108	transcript=PF3D7_1120100.1	NaN	gene=PF3D7_1120100 | organism=Plasmodium_falciparum_3D7 | gene_product=phosphoglycerate mutase, putative | transcript_product=phosphoglycerate mutase, putative | location=Pf3D7_11_v3:761695-762818(+) | protein_length=250 | sequence_SO=chromosome | SO=protein_coding | is_pseudo=false	NaN	1	41.2813	1.41281	2673-1uM	DMSO
2673-1uM / DMSO	_GANESVVISSK_	83	Specific-N	transcript=PF3D7_1361900.1	0.945232	0.945232	1.72294e-15	5.85286e-14	54	transcript=PF3D7_1361900.1	NaN	gene=PF3D7_1361900 | organism=Plasmodium_falciparum_3D7 | gene_product=proliferating cell nuclear antigen 1 | transcript_product=proliferating cell nuclear antigen 1 | location=Pf3D7_13_v3:2482472-2483296(-) | protein_length=274 | sequence_SO=chromosome | SO=protein_coding | is_pseudo=false	NaN	1	92.5498	1.9255	2673-1uM	DMSO
2673-1uM / DMSO	_LQPAEIETC[Carbamidomethyl (C)]M[Oxidation (M)]K_	575	Specific	transcript=PF3D7_0818900.1	0.555879	0.555879	1.72831e-15	5.86239e-14	54	transcript=PF3D7_0818900.1	NaN	gene=PF3D7_0818900 | organism=Plasmodium_falciparum_3D7 | gene_product=heat shock protein 70 | transcript_product=heat shock protein 70 | location=Pf3D7_08_v3:860384-862417(+) | protein_length=677 | sequence_SO=chromosome | SO=protein_coding | is_pseudo=false	NaN	1	47.0064	1.47006	2673-1uM	DMSO
2673-1uM / DMSO	_VHLTPEEK_	2	Specific-N	P02042	0.486602	0.486602	1.76313e-15	5.97165e-14	108	P02042	HBD	Hemoglobin subunit delta	HBD_HUMAN	1	40.1141	1.40114	2673-1uM	DMSO
2673-10uM / DMSO	_TPVISSPMDTVTGH_	50	Specific-C	transcript=PF3D7_0920800.1	-0.200805	0.200805	1.7876e-15	6.03955e-14	54	transcript=PF3D7_0920800.1	NaN	gene=PF3D7_0920800 | organism=Plasmodium_falciparum_3D7 | gene_product=inosine-5'-monophosphate dehydrogenase | transcript_product=inosine-5'-monophosphate dehydrogenase | location=Pf3D7_09_v3:852525-854057(-) | protein_length=510 | sequence_SO=chromosome | SO=protein_coding | is_pseudo=false	NaN	1	-12.9935	0.870065	2673-10uM	DMSO
2673-1uM / DMSO	_AIIAPSVLAS_	6	Specific-C	transcript=PF3D7_1219900.1	-0.554187	0.554187	1.78846e-15	6.03955e-14	45	transcript=PF3D7_1219900.1	NaN	gene=PF3D7_1219900 | organism=Plasmodium_falciparum_3D7 | gene_product=ribulose-phosphate 3-epimerase, putative | transcript_product=ribulose-phosphate 3-epimerase, putative | location=Pf3D7_12_v3:796500-797183(+) | protein_length=227 | sequence_SO=chromosome | SO=protein_coding | is_pseudo=false	NaN	1	-31.8959	0.681041	2673-1uM	DMSO
2673-10uM / DMSO	_GFDEYMNMVLDQTK_	47	Specific-N	transcript=PF3D7_1350200.1	0.371327	0.371327	1.79123e-15	6.03999e-14	54	transcript=PF3D7_1350200.1	NaN	gene=PF3D7_1350200 | organism=Plasmodium_falciparum_3D7 | gene_product=small nuclear ribonucleoprotein E, putative | transcript_product=small nuclear ribonucleoprotein E, putative | location=Pf3D7_13_v3:2009477-2010281(-) | protein_length=93 | sequence_SO=chromosome | SO=protein_coding | is_pseudo=false	NaN	1	29.3542	1.29354	2673-10uM	DMSO
2673-1uM / DMSO	_LWNTLAQC[Carbamidomethyl (C)]K_	140	Specific	transcript=PF3D7_0826700.1	0.761719	0.761719	1.80044e-15	6.0621e-14	54	transcript=PF3D7_0826700.1	NaN	gene=PF3D7_0826700 | organism=Plasmodium_falciparum_3D7 | gene_product=receptor for activated c kinase | transcript_product=receptor for activated c kinase | location=Pf3D7_08_v3:1160164-1161708(-) | protein_length=323 | sequence_SO=chromosome | SO=protein_coding | is_pseudo=false	NaN	1	69.5509	1.69551	2673-1uM	DMSO
2673-10uM / DMSO	_ESQELIDLVK_	263	Specific-N	transcript=PF3D7_1029600.1	-0.546675	0.546675	1.81716e-15	6.10941e-14	54	transcript=PF3D7_1029600.1	NaN	gene=PF3D7_1029600 | organism=Plasmodium_falciparum_3D7 | gene_product=adenosine deaminase | transcript_product=adenosine deaminase | location=Pf3D7_10_v3:1206302-1207405(+) | protein_length=367 | sequence_SO=chromosome | SO=protein_coding | is_pseudo=false	NaN	1	-31.5404	0.684596	2673-10uM	DMSO
2673-10uM / DMSO	_ILINSDEHNSEIINEK_	152	Specific-N	transcript=PF3D7_1454400.1	0.842195	0.842195	1.84552e-15	6.19563e-14	63	transcript=PF3D7_1454400.1	NaN	gene=PF3D7_1454400 | organism=Plasmodium_falciparum_3D7 | gene_product=aminopeptidase P | transcript_product=aminopeptidase P | location=Pf3D7_14_v3:2234143-2236476(+) | protein_length=777 | sequence_SO=chromosome | SO=protein_coding | is_pseudo=false	NaN	1	79.2776	1.79278	2673-10uM	DMSO
2673-10uM / DMSO	_VEESAFNLYDAIVK_	191	Specific	transcript=PF3D7_0907700.1	0.328218	0.328218	1.89447e-15	6.35063e-14	54	transcript=PF3D7_0907700.1	NaN	gene=PF3D7_0907700 | organism=Plasmodium_falciparum_3D7 | gene_product=proteasome activator 28 subunit beta, putative | transcript_product=proteasome activator 28 subunit beta, putative | location=Pf3D7_09_v3:364069-364908(-) | protein_length=279 | sequence_SO=chromosome | SO=protein_coding | is_pseudo=false	NaN	1	25.5462	1.25546	2673-10uM	DMSO
2673-10uM / DMSO	_ATAVLPMLNYELSDEIK_	717	Specific-N	transcript=PF3D7_0524000.1	0.634714	0.634714	1.90736e-15	6.38451e-14	54	transcript=PF3D7_0524000.1	NaN	gene=PF3D7_0524000 | organism=Plasmodium_falciparum_3D7 | gene_product=karyopherin beta | transcript_product=karyopherin beta | location=Pf3D7_05_v3:998753-1002124(+) | protein_length=1123 | sequence_SO=chromosome | SO=protein_coding | is_pseudo=false	NaN	1	55.263	1.55263	2673-10uM	DMSO
2673-10uM / DMSO	_NLHGLPGVVGGLA_	332;332	Unspecific	A0A0A0MQS8;Q02094	-0.202166	0.202166	1.95371e-15	6.53006e-14	54	A0A0A0MQS8;Q02094	RHAG	Ammonium transporter Rh type A	A0A0A0MQS8_HUMAN;RHAG_HUMAN	1	-13.0756	0.869244	2673-10uM	DMSO
2673-10uM / DMSO	_NNLLEYMK_	113	Specific	transcript=PF3D7_1129100.1	0.240941	0.240941	1.96562e-15	6.5603e-14	54	transcript=PF3D7_1129100.1	NaN	gene=PF3D7_1129100 | organism=Plasmodium_falciparum_3D7 | gene_product=parasitophorous vacuolar protein 1 | transcript_product=parasitophorous vacuolar protein 1 | location=Pf3D7_11_v3:1125952-1127310(+) | protein_length=452 | sequence_SO=chromosome | SO=protein_coding | is_pseudo=false	NaN	1	18.1763	1.18176	2673-10uM	DMSO
2673-10uM / DMSO	_VILVNPNIA_	713	Unspecific	transcript=PF3D7_1308200.1	-0.417816	0.417816	1.98282e-15	6.60805e-14	90	transcript=PF3D7_1308200.1	NaN	gene=PF3D7_1308200 | organism=Plasmodium_falciparum_3D7 | gene_product=carbamoyl phosphate synthetase | transcript_product=carbamoyl phosphate synthetase | location=Pf3D7_13_v3:361166-368495(-) | protein_length=2375 | sequence_SO=chromosome | SO=protein_coding | is_pseudo=false	NaN	1	-25.1443	0.748557	2673-10uM	DMSO
2673-10uM / DMSO	_IIDVLPSPVYPTID_	240	Specific-C	transcript=PF3D7_0727400.1	-0.943274	0.943274	2.02121e-15	6.72619e-14	54	transcript=PF3D7_0727400.1	NaN	gene=PF3D7_0727400 | organism=Plasmodium_falciparum_3D7 | gene_product=proteasome subunit alpha type-5, putative | transcript_product=proteasome subunit alpha type-5, putative | location=Pf3D7_07_v3:1162710-1163831(+) | protein_length=256 | sequence_SO=chromosome | SO=protein_coding | is_pseudo=false	NaN	1	-47.9949	0.520051	2673-10uM	DMSO
2673-10uM / DMSO	_KLHVDPENFR_	96	Specific-N	P02042	-0.443859	0.443859	2.04708e-15	6.80236e-14	108	P02042	HBD	Hemoglobin subunit delta	HBD_HUMAN	1	-26.4834	0.735166	2673-10uM	DMSO
2673-1uM / DMSO	_LFVTEGTLEYLLLDK_	1193	Specific	transcript=PF3D7_0929400.1	0.517373	0.517373	2.05615e-15	6.82261e-14	45	transcript=PF3D7_0929400.1	NaN	gene=PF3D7_0929400 | organism=Plasmodium_falciparum_3D7 | gene_product=high molecular weight rhoptry protein 2 | transcript_product=high molecular weight rhoptry protein 2 | location=Pf3D7_09_v3:1175203-1180762(+) | protein_length=1378 | sequence_SO=chromosome | SO=protein_coding | is_pseudo=false	NaN	1	43.1347	1.43135	2673-1uM	DMSO
2673-10uM / DMSO	_TNAVAHVDDMPNALSAL_	68	Unspecific	P69905	1.80713	1.80713	2.07022e-15	6.85934e-14	54	P69905	HBA1	Hemoglobin subunit alpha	HBA_HUMAN	1	249.944	3.49944	2673-10uM	DMSO
2673-1uM / DMSO	_NNLIIEETEIESFLK_	245	Specific-N	transcript=PF3D7_0320500.1	0.405187	0.405187	2.11282e-15	6.99034e-14	54	transcript=PF3D7_0320500.1	NaN	gene=PF3D7_0320500 | organism=Plasmodium_falciparum_3D7 | gene_product=nicotinamidase, putative | transcript_product=nicotinamidase, putative | location=Pf3D7_03_v3:860813-862102(+) | protein_length=429 | sequence_SO=chromosome | SO=protein_coding | is_pseudo=false	NaN	1	32.426	1.32426	2673-1uM	DMSO
2673-10uM / DMSO	_IDPLFNNIIIAGINSQK_	106	Specific	transcript=PF3D7_0803800.1	1.44823	1.44823	2.15056e-15	7.10493e-14	63	transcript=PF3D7_0803800.1	NaN	gene=PF3D7_0803800 | organism=Plasmodium_falciparum_3D7 | gene_product=proteasome subunit beta type-4 | transcript_product=proteasome subunit beta type-4 | location=Pf3D7_08_v3:233467-234426(-) | protein_length=265 | sequence_SO=chromosome | SO=protein_coding | is_pseudo=false	NaN	1	172.874	2.72874	2673-10uM	DMSO
2673-10uM / DMSO	_HIEAINNDIQIIK_	597	Specific	transcript=PF3D7_1228600.1	-0.402606	0.402606	2.18041e-15	7.19315e-14	108	transcript=PF3D7_1228600.1	NaN	gene=PF3D7_1228600 | organism=Plasmodium_falciparum_3D7 | gene_product=merozoite surface protein 9 | transcript_product=merozoite surface protein 9 | location=Pf3D7_12_v3:1160729-1162960(-) | protein_length=743 | sequence_SO=chromosome | SO=protein_coding | is_pseudo=false	NaN	1	-24.3509	0.756491	2673-10uM	DMSO
2673-10uM / DMSO	_NILADVVVL_	221	Unspecific	transcript=PF3D7_1361900.1	-0.760974	0.760974	2.19148e-15	7.21924e-14	72	transcript=PF3D7_1361900.1	NaN	gene=PF3D7_1361900 | organism=Plasmodium_falciparum_3D7 | gene_product=proliferating cell nuclear antigen 1 | transcript_product=proliferating cell nuclear antigen 1 | location=Pf3D7_13_v3:2482472-2483296(-) | protein_length=274 | sequence_SO=chromosome | SO=protein_coding | is_pseudo=false	NaN	1	-40.9902	0.590098	2673-10uM	DMSO
2673-10uM / DMSO	_GIVPVNDVL_	285	Unspecific	transcript=PF3D7_1228600.1	0.617831	0.617831	2.32187e-15	7.63778e-14	36	transcript=PF3D7_1228600.1	NaN	gene=PF3D7_1228600 | organism=Plasmodium_falciparum_3D7 | gene_product=merozoite surface protein 9 | transcript_product=merozoite surface protein 9 | location=Pf3D7_12_v3:1160729-1162960(-) | protein_length=743 | sequence_SO=chromosome | SO=protein_coding | is_pseudo=false	NaN	1	53.4567	1.53457	2673-10uM	DMSO
2673-10uM / DMSO	_AWESLEEAEYR_	395	Specific	P11277	0.306938	0.306938	2.38375e-15	7.83007e-14	54	P11277	SPTB	Spectrin beta chain, erythrocytic	SPTB1_HUMAN	1	23.7079	1.23708	2673-10uM	DMSO
2673-10uM / DMSO	_IMTQPINQIF_	11	Specific-C	transcript=PF3D7_1350200.1	-1.04915	1.04915	2.3975e-15	7.86394e-14	36	transcript=PF3D7_1350200.1	NaN	gene=PF3D7_1350200 | organism=Plasmodium_falciparum_3D7 | gene_product=small nuclear ribonucleoprotein E, putative | transcript_product=small nuclear ribonucleoprotein E, putative | location=Pf3D7_13_v3:2009477-2010281(-) | protein_length=93 | sequence_SO=chromosome | SO=protein_coding | is_pseudo=false	NaN	1	-51.6747	0.483253	2673-10uM	DMSO
2673-10uM / DMSO	_DVVFTDEMAHFDR_	54	Specific-N	P04040	-0.293051	0.293051	2.47472e-15	8.05941e-14	99	P04040	CAT	Catalase	CATA_HUMAN	1	-18.3826	0.816174	2673-10uM	DMSO
2673-10uM / DMSO	_LQNPVEIFIDDEAK_	274	Specific-N	transcript=PF3D7_0209800.1	-0.481946	0.481946	2.46982e-15	8.05941e-14	81	transcript=PF3D7_0209800.1	NaN	gene=PF3D7_0209800 | organism=Plasmodium_falciparum_3D7 | gene_product=ATP-dependent RNA helicase UAP56 | transcript_product=ATP-dependent RNA helicase UAP56 | location=Pf3D7_02_v3:404281-406355(-) | protein_length=457 | sequence_SO=chromosome | SO=protein_coding | is_pseudo=false	NaN	1	-28.3989	0.716011	2673-10uM	DMSO
2673-1uM / DMSO	_NC[Carbamidomethyl (C)]PNAFIIV_	116	Specific-C	transcript=PF3D7_1324900.1	-0.483966	0.483966	2.47455e-15	8.05941e-14	54	transcript=PF3D7_1324900.1	NaN	gene=PF3D7_1324900 | organism=Plasmodium_falciparum_3D7 | gene_product=L-lactate dehydrogenase | transcript_product=L-lactate dehydrogenase | location=Pf3D7_13_v3:1041157-1042107(+) | protein_length=316 | sequence_SO=chromosome | SO=protein_coding | is_pseudo=false	NaN	1	-28.4991	0.715009	2673-1uM	DMSO
2673-10uM / DMSO	_C[Carbamidomethyl (C)]NETQC[Carbamidomethyl (C)]TGGYPLTIK_	11	Specific	transcript=PF3D7_1407500.1	0.859786	0.859786	2.46339e-15	8.05941e-14	36	transcript=PF3D7_1407500.1	NaN	gene=PF3D7_1407500 | organism=Plasmodium_falciparum_3D7 | gene_product=multifunctional methyltransferase subunit TRM112, putative | transcript_product=multifunctional methyltransferase subunit TRM112, putative | location=Pf3D7_14_v3:269881-270927(+) | protein_length=125 | sequence_SO=chromosome | SO=protein_coding | is_pseudo=false	NaN	1	81.4769	1.81477	2673-10uM	DMSO
2673-10uM / DMSO	_MPQEILELTTR_	206	Specific-N	transcript=PF3D7_1468700.1	-0.54079	0.54079	2.47109e-15	8.05941e-14	45	transcript=PF3D7_1468700.1	NaN	gene=PF3D7_1468700 | organism=Plasmodium_falciparum_3D7 | gene_product=eukaryotic initiation factor 4A | transcript_product=eukaryotic initiation factor 4A | location=Pf3D7_14_v3:2825370-2826918(+) | protein_length=398 | sequence_SO=chromosome | SO=protein_coding | is_pseudo=false	NaN	1	-31.2606	0.687394	2673-10uM	DMSO
2673-10uM / DMSO	_NIITVPLYDSLGPQSSR_	140	Specific-N	transcript=PF3D7_0525100.1	0.313025	0.313025	2.48613e-15	8.08505e-14	54	transcript=PF3D7_0525100.1	NaN	gene=PF3D7_0525100 | organism=Plasmodium_falciparum_3D7 | gene_product=acyl-CoA synthetase | transcript_product=acyl-CoA synthetase | location=Pf3D7_05_v3:1041745-1043766(+) | protein_length=673 | sequence_SO=chromosome | SO=protein_coding | is_pseudo=false	NaN	1	24.231	1.24231	2673-10uM	DMSO
2673-10uM / DMSO	_HYYLLDSEELK_	227	Specific	transcript=PF3D7_1120100.1	0.406369	0.406369	2.49264e-15	8.0947e-14	54	transcript=PF3D7_1120100.1	NaN	gene=PF3D7_1120100 | organism=Plasmodium_falciparum_3D7 | gene_product=phosphoglycerate mutase, putative | transcript_product=phosphoglycerate mutase, putative | location=Pf3D7_11_v3:761695-762818(+) | protein_length=250 | sequence_SO=chromosome | SO=protein_coding | is_pseudo=false	NaN	1	32.5346	1.32535	2673-10uM	DMSO
2673-1uM / DMSO	_AAPGSMIDLMK_	387	Specific	transcript=PF3D7_1446200.1	0.65067	0.65067	2.50345e-15	8.11827e-14	45	transcript=PF3D7_1446200.1	NaN	gene=PF3D7_1446200 | organism=Plasmodium_falciparum_3D7 | gene_product=M17 leucyl aminopeptidase | transcript_product=M17 leucyl aminopeptidase | location=Pf3D7_14_v3:1893200-1895017(-) | protein_length=605 | sequence_SO=chromosome | SO=protein_coding | is_pseudo=false	NaN	1	56.9897	1.5699	2673-1uM	DMSO
2673-10uM / DMSO	_SVHAGEDVSIPNLNSL_	228	Unspecific	transcript=PF3D7_1029600.1	-1.31279	1.31279	2.53414e-15	8.20616e-14	45	transcript=PF3D7_1029600.1	NaN	gene=PF3D7_1029600 | organism=Plasmodium_falciparum_3D7 | gene_product=adenosine deaminase | transcript_product=adenosine deaminase | location=Pf3D7_10_v3:1206302-1207405(+) | protein_length=367 | sequence_SO=chromosome | SO=protein_coding | is_pseudo=false	NaN	1	-59.7458	0.402542	2673-10uM	DMSO
2673-10uM / DMSO	_GVSDLAQHFLVK_	297	Specific	transcript=PF3D7_1229500.1	0.275235	0.275235	2.58664e-15	8.35249e-14	99	transcript=PF3D7_1229500.1	NaN	gene=PF3D7_1229500 | organism=Plasmodium_falciparum_3D7 | gene_product=T-complex protein 1 subunit gamma | transcript_product=T-complex protein 1 subunit gamma | location=Pf3D7_12_v3:1211788-1213563(+) | protein_length=542 | sequence_SO=chromosome | SO=protein_coding | is_pseudo=false	NaN	1	21.0191	1.21019	2673-10uM	DMSO
2673-1uM / DMSO	_SLTNSFNNLDFDPSK_	22	Specific	transcript=PF3D7_1439900.1	0.697904	0.697904	2.58501e-15	8.35249e-14	54	transcript=PF3D7_1439900.1	NaN	gene=PF3D7_1439900 | organism=Plasmodium_falciparum_3D7 | gene_product=triosephosphate isomerase | transcript_product=triosephosphate isomerase | location=Pf3D7_14_v3:1622576-1623612(+) | protein_length=248 | sequence_SO=chromosome | SO=protein_coding | is_pseudo=false	NaN	1	62.2146	1.62215	2673-1uM	DMSO
2673-10uM / DMSO	_AHQVVEDGYEFFAK_	245	Specific	transcript=PF3D7_1414400.1	1.01864	1.01864	2.59463e-15	8.36649e-14	72	transcript=PF3D7_1414400.1	NaN	gene=PF3D7_1414400 | organism=Plasmodium_falciparum_3D7 | gene_product=serine/threonine protein phosphatase PP1 | transcript_product=serine/threonine protein phosphatase PP1 | location=Pf3D7_14_v3:575496-577055(+) | protein_length=304 | sequence_SO=chromosome | SO=protein_coding | is_pseudo=false	NaN	1	102.6	2.026	2673-10uM	DMSO
2673-1uM / DMSO	_AQEILSQLPIKQ_	29	Specific-C	P35754	-0.609104	0.609104	2.60366e-15	8.3838e-14	54	P35754	GLRX	Glutaredoxin-1	GLRX1_HUMAN	1	-34.4396	0.655604	2673-1uM	DMSO
2673-10uM / DMSO	_DNVFEFWDWVGGR_	282	Specific	transcript=PF3D7_1436000.1	0.782566	0.782566	2.61887e-15	8.42089e-14	54	transcript=PF3D7_1436000.1	NaN	gene=PF3D7_1436000 | organism=Plasmodium_falciparum_3D7 | gene_product=glucose-6-phosphate isomerase | transcript_product=glucose-6-phosphate isomerase | location=Pf3D7_14_v3:1458131-1459870(+) | protein_length=579 | sequence_SO=chromosome | SO=protein_coding | is_pseudo=false	NaN	1	72.0188	1.72019	2673-10uM	DMSO
2673-1uM / DMSO	_SLFEGIDYSVT_	299	Unspecific	transcript=PF3D7_0818900.1	-0.263798	0.263798	2.67505e-15	8.58946e-14	45	transcript=PF3D7_0818900.1	NaN	gene=PF3D7_0818900 | organism=Plasmodium_falciparum_3D7 | gene_product=heat shock protein 70 | transcript_product=heat shock protein 70 | location=Pf3D7_08_v3:860384-862417(+) | protein_length=677 | sequence_SO=chromosome | SO=protein_coding | is_pseudo=false	NaN	1	-16.7108	0.832892	2673-1uM	DMSO
2673-10uM / DMSO	_VFIPHGLIMDR_	35	Specific	P00492	0.507018	0.507018	2.805e-15	8.99134e-14	45	P00492	HPRT1	Hypoxanthine-guanine phosphoribosyltransferase	HPRT_HUMAN	1	42.111	1.42111	2673-10uM	DMSO
2673-1uM / DMSO	_SIGSAQEGAELLLQENYK_	171	Specific-N	transcript=PF3D7_0727400.1	0.861577	0.861577	2.81201e-15	8.99134e-14	54	transcript=PF3D7_0727400.1	NaN	gene=PF3D7_0727400 | organism=Plasmodium_falciparum_3D7 | gene_product=proteasome subunit alpha type-5, putative | transcript_product=proteasome subunit alpha type-5, putative | location=Pf3D7_07_v3:1162710-1163831(+) | protein_length=256 | sequence_SO=chromosome | SO=protein_coding | is_pseudo=false	NaN	1	81.7023	1.81702	2673-1uM	DMSO
2673-1uM / DMSO	_NDEKPEAPVENVVEDLK_	12	Specific-N	transcript=PF3D7_1419700.1	-0.39559	0.39559	2.80954e-15	8.99134e-14	72	transcript=PF3D7_1419700.1	NaN	gene=PF3D7_1419700 | organism=Plasmodium_falciparum_3D7 | gene_product=conserved Plasmodium protein, unknown function | transcript_product=conserved Plasmodium protein, unknown function | location=Pf3D7_14_v3:820068-821597(+) | protein_length=509 | sequence_SO=chromosome | SO=protein_coding | is_pseudo=false	NaN	1	-23.9822	0.760178	2673-1uM	DMSO
2673-10uM / DMSO	_ILNEIIEHSK_	913	Specific-N	transcript=PF3D7_1311800.1	0.397055	0.397055	2.83714e-15	9.05316e-14	81	transcript=PF3D7_1311800.1	NaN	gene=PF3D7_1311800 | organism=Plasmodium_falciparum_3D7 | gene_product=M1-family alanyl aminopeptidase | transcript_product=M1-family alanyl aminopeptidase | location=Pf3D7_13_v3:501790-505047(+) | protein_length=1085 | sequence_SO=chromosome | SO=protein_coding | is_pseudo=false	NaN	1	31.6817	1.31682	2673-10uM	DMSO
2673-10uM / DMSO	_YAVPGGLIGVGTK_	324	Specific	transcript=PF3D7_1410600.1	0.324071	0.324071	2.83926e-15	9.05316e-14	45	transcript=PF3D7_1410600.1	NaN	gene=PF3D7_1410600 | organism=Plasmodium_falciparum_3D7 | gene_product=eukaryotic translation initiation factor 2 subunit gamma, putative | transcript_product=eukaryotic translation initiation factor 2 subunit gamma, putative | location=Pf3D7_14_v3:427191-428588(+) | protein_length=465 | sequence_SO=chromosome | SO=protein_coding | is_pseudo=false	NaN	1	25.1858	1.25186	2673-10uM	DMSO
2673-1uM / DMSO	_QLTIDFLGH_	187	Unspecific	transcript=PF3D7_1242800.1	-0.428869	0.428869	2.8726e-15	9.14671e-14	45	transcript=PF3D7_1242800.1	NaN	gene=PF3D7_1242800 | organism=Plasmodium_falciparum_3D7 | gene_product=rab specific GDP dissociation inhibitor | transcript_product=rab specific GDP dissociation inhibitor | location=Pf3D7_12_v3:1805380-1807356(-) | protein_length=459 | sequence_SO=chromosome | SO=protein_coding | is_pseudo=false	NaN	1	-25.7156	0.742844	2673-1uM	DMSO
2673-10uM / DMSO	_LLYDGINNLIILK_	975	Specific	transcript=PF3D7_1369500.1	0.482351	0.482351	2.8822e-15	9.16451e-14	54	transcript=PF3D7_1369500.1	NaN	gene=PF3D7_1369500 | organism=Plasmodium_falciparum_3D7 | gene_product=conserved protein, unknown function | transcript_product=conserved protein, unknown function | location=Pf3D7_13_v3:2769916-2773480(+) | protein_length=1106 | sequence_SO=chromosome | SO=protein_coding | is_pseudo=false	NaN	1	39.7018	1.39702	2673-10uM	DMSO
2673-10uM / DMSO	_NLANEENTPTAPHLIEN_	213	Specific-C	transcript=PF3D7_1026800.1	0.476961	0.476961	2.89455e-15	9.191e-14	45	transcript=PF3D7_1026800.1	NaN	gene=PF3D7_1026800 | organism=Plasmodium_falciparum_3D7 | gene_product=40S ribosomal protein S2 | transcript_product=40S ribosomal protein S2 | location=Pf3D7_10_v3:1122962-1124037(+) | protein_length=263 | sequence_SO=chromosome | SO=protein_coding | is_pseudo=false	NaN	1	39.1809	1.39181	2673-10uM	DMSO
2673-10uM / DMSO	_VHVYC[Carbamidomethyl (C)]PLC[Carbamidomethyl (C)]QEIYK_	141	Specific	transcript=PF3D7_1103700.1	0.785054	0.785054	2.95564e-15	9.37197e-14	81	transcript=PF3D7_1103700.1	NaN	gene=PF3D7_1103700 | organism=Plasmodium_falciparum_3D7 | gene_product=casein kinase II beta chain | transcript_product=casein kinase II beta chain | location=Pf3D7_11_v3:160115-160852(+) | protein_length=245 | sequence_SO=chromosome | SO=protein_coding | is_pseudo=false	NaN	1	72.3157	1.72316	2673-10uM	DMSO
2673-10uM / DMSO	_NPNHPIMIDLLK_	704	Specific-N	transcript=PF3D7_1222300.1	-1.77283	1.77283	2.96257e-15	9.38094e-14	54	transcript=PF3D7_1222300.1	NaN	gene=PF3D7_1222300 | organism=Plasmodium_falciparum_3D7 | gene_product=endoplasmin, putative | transcript_product=endoplasmin, putative | location=Pf3D7_12_v3:883567-886032(-) | protein_length=821 | sequence_SO=chromosome | SO=protein_coding | is_pseudo=false	NaN	1	-70.7367	0.292633	2673-10uM	DMSO
2673-10uM / DMSO	_NYPNTYLLSSAIK_	288	Specific	transcript=PF3D7_0931400.1	0.518625	0.518625	3.00827e-15	9.48881e-14	54	transcript=PF3D7_0931400.1	NaN	gene=PF3D7_0931400 | organism=Plasmodium_falciparum_3D7 | gene_product=PUB domain-containing protein, putative | transcript_product=PUB domain-containing protein, putative | location=Pf3D7_09_v3:1263347-1264830(+) | protein_length=310 | sequence_SO=chromosome | SO=protein_coding | is_pseudo=false	NaN	1	43.2589	1.43259	2673-10uM	DMSO
2673-10uM / DMSO	_NMPDLAIHISSR_	519	Specific	transcript=PF3D7_1206200.1	0.432905	0.432905	3.00909e-15	9.48881e-14	108	transcript=PF3D7_1206200.1	NaN	gene=PF3D7_1206200 | organism=Plasmodium_falciparum_3D7 | gene_product=eukaryotic translation initiation factor 3 subunit C, putative | transcript_product=eukaryotic translation initiation factor 3 subunit C, putative | location=Pf3D7_12_v3:275744-279336(-) | protein_length=984 | sequence_SO=chromosome | SO=protein_coding | is_pseudo=false	NaN	1	34.9949	1.34995	2673-10uM	DMSO
2673-1uM / DMSO	_YVTTC[Carbamidomethyl (C)]DNDDLPTLEFHSR_	366	Specific-N	transcript=PF3D7_1407800.1	-0.607646	0.607646	3.00138e-15	9.48881e-14	45	transcript=PF3D7_1407800.1	NaN	gene=PF3D7_1407800 | organism=Plasmodium_falciparum_3D7 | gene_product=plasmepsin IV | transcript_product=plasmepsin IV | location=Pf3D7_14_v3:283086-284435(+) | protein_length=449 | sequence_SO=chromosome | SO=protein_coding | is_pseudo=false	NaN	1	-34.3733	0.656267	2673-1uM	DMSO
2673-10uM / DMSO	_LWVPSVNC[Carbamidomethyl (C)]DSIGC[Carbamidomethyl (C)]STK_	161	Specific-N	transcript=PF3D7_1407800.1	0.423814	0.423814	3.0889e-15	9.72707e-14	54	transcript=PF3D7_1407800.1	NaN	gene=PF3D7_1407800 | organism=Plasmodium_falciparum_3D7 | gene_product=plasmepsin IV | transcript_product=plasmepsin IV | location=Pf3D7_14_v3:283086-284435(+) | protein_length=449 | sequence_SO=chromosome | SO=protein_coding | is_pseudo=false	NaN	1	34.147	1.34147	2673-10uM	DMSO
2673-10uM / DMSO	_LMSQYIEFVADR_	279	Specific	transcript=PF3D7_1405600.1	1.12385	1.12385	3.20793e-15	1.0088e-13	54	transcript=PF3D7_1405600.1	NaN	gene=PF3D7_1405600 | organism=Plasmodium_falciparum_3D7 | gene_product=ribonucleoside-diphosphate reductase small chain, putative | transcript_product=ribonucleoside-diphosphate reductase small chain, putative | location=Pf3D7_14_v3:193216-194265(-) | protein_length=349 | sequence_SO=chromosome | SO=protein_coding | is_pseudo=false	NaN	1	117.928	2.17928	2673-10uM	DMSO
2673-10uM / DMSO	_NILNYADENIQK_	494	Specific	transcript=PF3D7_1212700.1	0.264932	0.264932	3.21742e-15	1.01039e-13	54	transcript=PF3D7_1212700.1	NaN	gene=PF3D7_1212700 | organism=Plasmodium_falciparum_3D7 | gene_product=eukaryotic translation initiation factor 3 subunit A, putative | transcript_product=eukaryotic translation initiation factor 3 subunit A, putative | location=Pf3D7_12_v3:558047-562180(-) | protein_length=1377 | sequence_SO=chromosome | SO=protein_coding | is_pseudo=false	NaN	1	20.158	1.20158	2673-10uM	DMSO
2673-10uM / DMSO	_SALSDLHAH_	82	Unspecific	P69905	-0.541868	0.541868	3.2479e-15	1.01857e-13	90	P69905	HBA1	Hemoglobin subunit alpha	HBA_HUMAN	1	-31.3119	0.686881	2673-10uM	DMSO
2673-10uM / DMSO	_IVLHNSEFSDNK_	1218	Specific	transcript=PF3D7_1219100.1	-0.243368	0.243368	3.31933e-15	1.03954e-13	54	transcript=PF3D7_1219100.1	NaN	gene=PF3D7_1219100 | organism=Plasmodium_falciparum_3D7 | gene_product=clathrin heavy chain, putative | transcript_product=clathrin heavy chain, putative | location=Pf3D7_12_v3:757649-763642(+) | protein_length=1997 | sequence_SO=chromosome | SO=protein_coding | is_pseudo=false	NaN	1	-15.5229	0.844771	2673-10uM	DMSO
2673-1uM / DMSO	_AAHLPAEFTPA_	111	Unspecific	P69905	-0.382567	0.382567	3.33784e-15	1.04391e-13	54	P69905	HBA1	Hemoglobin subunit alpha	HBA_HUMAN	1	-23.2929	0.767071	2673-1uM	DMSO
2673-10uM / DMSO	_IVSFPSWTLFK_	585	Specific	transcript=PF3D7_0610800.1	0.977507	0.977507	3.38558e-15	1.05739e-13	45	transcript=PF3D7_0610800.1	NaN	gene=PF3D7_0610800 | organism=Plasmodium_falciparum_3D7 | gene_product=transketolase | transcript_product=transketolase | location=Pf3D7_06_v3:453671-455689(+) | protein_length=672 | sequence_SO=chromosome | SO=protein_coding | is_pseudo=false	NaN	1	96.906	1.96906	2673-10uM	DMSO
2673-10uM / DMSO	_VNNDLHQIYEISLK_	293	Specific	transcript=PF3D7_0629200.1	0.452858	0.452858	3.4844e-15	1.08677e-13	63	transcript=PF3D7_0629200.1	NaN	gene=PF3D7_0629200 | organism=Plasmodium_falciparum_3D7 | gene_product=DnaJ protein, putative | transcript_product=DnaJ protein, putative | location=Pf3D7_06_v3:1199853-1200995(-) | protein_length=380 | sequence_SO=chromosome | SO=protein_coding | is_pseudo=false	NaN	1	36.8749	1.36875	2673-10uM	DMSO
2673-10uM / DMSO	_GTDNIEPHGIPVDLLDR_	360	Specific	transcript=PF3D7_1106000.1	0.287786	0.287786	3.49565e-15	1.08879e-13	99	transcript=PF3D7_1106000.1	NaN	gene=PF3D7_1106000 | organism=Plasmodium_falciparum_3D7 | gene_product=RuvB-like helicase 2 | transcript_product=RuvB-like helicase 2 | location=Pf3D7_11_v3:255714-257141(-) | protein_length=475 | sequence_SO=chromosome | SO=protein_coding | is_pseudo=false	NaN	1	22.0766	1.22077	2673-10uM	DMSO
2673-1uM / DMSO	_GVSFLIGGY_	131	Unspecific	transcript=PF3D7_1353800.1	-0.624037	0.624037	3.59508e-15	1.11824e-13	54	transcript=PF3D7_1353800.1	NaN	gene=PF3D7_1353800 | organism=Plasmodium_falciparum_3D7 | gene_product=proteasome subunit alpha type-4, putative | transcript_product=proteasome subunit alpha type-4, putative | location=Pf3D7_13_v3:2151402-2152373(-) | protein_length=246 | sequence_SO=chromosome | SO=protein_coding | is_pseudo=false	NaN	1	-35.1147	0.648853	2673-1uM	DMSO
2673-10uM / DMSO	_KGPVELTEEDIAFK_	18	Specific	transcript=PF3D7_0323000.1	-0.267954	0.267954	3.63151e-15	1.12804e-13	108	transcript=PF3D7_0323000.1	NaN	gene=PF3D7_0323000 | organism=Plasmodium_falciparum_3D7 | gene_product=translation machinery-associated protein 7, putative | transcript_product=translation machinery-associated protein 7, putative | location=Pf3D7_03_v3:968675-969202(-) | protein_length=54 | sequence_SO=chromosome | SO=protein_coding | is_pseudo=false	NaN	1	-16.9504	0.830496	2673-10uM	DMSO
2673-10uM / DMSO	_SVEGIFSF_	395	Unspecific	transcript=PF3D7_0926700.1	0.368664	0.368664	3.72303e-15	1.1549e-13	36	transcript=PF3D7_0926700.1	NaN	gene=PF3D7_0926700 | organism=Plasmodium_falciparum_3D7 | gene_product=glutamine-dependent NAD(+) synthetase, putative | transcript_product=glutamine-dependent NAD(+) synthetase, putative | location=Pf3D7_09_v3:1089911-1092430(+) | protein_length=839 | sequence_SO=chromosome | SO=protein_coding | is_pseudo=false	NaN	1	29.1156	1.29116	2673-10uM	DMSO
2673-10uM / DMSO	_GLVGLPNVGK_	25	Specific-N	transcript=PF3D7_0722400.1	-1.01069	1.01069	3.73329e-15	1.15495e-13	72	transcript=PF3D7_0722400.1	NaN	gene=PF3D7_0722400 | organism=Plasmodium_falciparum_3D7 | gene_product=Obg-like ATPase 1, putative | transcript_product=Obg-like ATPase 1, putative | location=Pf3D7_07_v3:954784-956343(+) | protein_length=393 | sequence_SO=chromosome | SO=protein_coding | is_pseudo=false	NaN	1	-50.3692	0.496308	2673-10uM	DMSO
2673-10uM / DMSO	_TVLGDIATAL_	710	Unspecific	transcript=PF3D7_0815200.1	-0.545423	0.545423	3.729e-15	1.15495e-13	81	transcript=PF3D7_0815200.1	NaN	gene=PF3D7_0815200 | organism=Plasmodium_falciparum_3D7 | gene_product=importin subunit beta, putative | transcript_product=importin subunit beta, putative | location=Pf3D7_08_v3:717113-719746(+) | protein_length=877 | sequence_SO=chromosome | SO=protein_coding | is_pseudo=false	NaN	1	-31.481	0.68519	2673-10uM	DMSO
2673-10uM / DMSO	_DILC[Carbamidomethyl (C)]LEDIPYKDEIK_	19	Specific	transcript=PF3D7_1216900.1	0.478465	0.478465	3.8877e-15	1.20109e-13	72	transcript=PF3D7_1216900.1	NaN	gene=PF3D7_1216900 | organism=Plasmodium_falciparum_3D7 | gene_product=DNA-binding chaperone, putative | transcript_product=DNA-binding chaperone, putative | location=Pf3D7_12_v3:670447-673266(+) | protein_length=939 | sequence_SO=chromosome | SO=protein_coding | is_pseudo=false	NaN	1	39.3261	1.39326	2673-10uM	DMSO
2673-10uM / DMSO	_VLETHEDHVITEVLN_	169	Specific-C	transcript=PF3D7_0626800.1	-0.321298	0.321298	3.89691e-15	1.20231e-13	90	transcript=PF3D7_0626800.1	NaN	gene=PF3D7_0626800 | organism=Plasmodium_falciparum_3D7 | gene_product=pyruvate kinase | transcript_product=pyruvate kinase | location=Pf3D7_06_v3:1078995-1081320(+) | protein_length=511 | sequence_SO=chromosome | SO=protein_coding | is_pseudo=false	NaN	1	-19.965	0.80035	2673-10uM	DMSO
2673-1uM / DMSO	_LYVTDGSSIILENIGTK_	23	Specific-N	transcript=PF3D7_1010700.1	0.213307	0.213307	3.94868e-15	1.21664e-13	54	transcript=PF3D7_1010700.1	NaN	gene=PF3D7_1010700 | organism=Plasmodium_falciparum_3D7 | gene_product=dolichyl-phosphate-mannose--protein mannosyltransferase, putative | transcript_product=dolichyl-phosphate-mannose--protein mannosyltransferase, putative | location=Pf3D7_10_v3:422961-424365(+) | protein_length=223 | sequence_SO=chromosome | SO=protein_coding | is_pseudo=false	NaN	1	15.9343	1.15934	2673-1uM	DMSO
2673-10uM / DMSO	_FDTSLLTSGF_	686	Unspecific	transcript=PF3D7_0708400.1	-1.27083	1.27083	4.05716e-15	1.24838e-13	54	transcript=PF3D7_0708400.1	NaN	gene=PF3D7_0708400 | organism=Plasmodium_falciparum_3D7 | gene_product=heat shock protein 90 | transcript_product=heat shock protein 90 | location=Pf3D7_07_v3:381592-384614(+) | protein_length=745 | sequence_SO=chromosome | SO=protein_coding | is_pseudo=false	NaN	1	-58.5578	0.414422	2673-10uM	DMSO
2673-10uM / DMSO	_SHC[Carbamidomethyl (C)]LLVTL_	103	Unspecific	P69905	-0.389421	0.389421	4.19487e-15	1.28902e-13	99	P69905	HBA1	Hemoglobin subunit alpha	HBA_HUMAN	1	-23.6564	0.763436	2673-10uM	DMSO
2673-10uM / DMSO	_LVFDILDLYR_	423	Specific	transcript=PF3D7_1213800.1	0.397305	0.397305	4.25236e-15	1.30493e-13	54	transcript=PF3D7_1213800.1	NaN	gene=PF3D7_1213800 | organism=Plasmodium_falciparum_3D7 | gene_product=proline--tRNA ligase | transcript_product=proline--tRNA ligase | location=Pf3D7_12_v3:590194-592434(-) | protein_length=746 | sequence_SO=chromosome | SO=protein_coding | is_pseudo=false	NaN	1	31.7045	1.31704	2673-10uM	DMSO
2673-10uM / DMSO	_SIPIIIGQK_	154	Specific	transcript=PF3D7_0605100.1	-0.265973	0.265973	4.29617e-15	1.31661e-13	108	transcript=PF3D7_0605100.1	NaN	gene=PF3D7_0605100 | organism=Plasmodium_falciparum_3D7 | gene_product=RNA-binding protein, putative | transcript_product=RNA-binding protein, putative | location=Pf3D7_06_v3:217240-219507(+) | protein_length=755 | sequence_SO=chromosome | SO=protein_coding | is_pseudo=false	NaN	1	-16.8362	0.831638	2673-10uM	DMSO
2673-1uM / DMSO	_YQSNIENC[Carbamidomethyl (C)]ILK_	268	Specific	transcript=PF3D7_1030500.1	0.536862	0.536862	4.44172e-15	1.35939e-13	54	transcript=PF3D7_1030500.1	NaN	gene=PF3D7_1030500 | organism=Plasmodium_falciparum_3D7 | gene_product=26S proteasome regulatory subunit RPN9, putative | transcript_product=26S proteasome regulatory subunit RPN9, putative | location=Pf3D7_10_v3:1244215-1245396(+) | protein_length=393 | sequence_SO=chromosome | SO=protein_coding | is_pseudo=false	NaN	1	45.0814	1.45081	2673-1uM	DMSO
2673-10uM / DMSO	_GEYGAEALER_	23	Specific-N	P69905	0.563687	0.563687	4.55985e-15	1.39368e-13	45	P69905	HBA1	Hemoglobin subunit alpha	HBA_HUMAN	1	47.8041	1.47804	2673-10uM	DMSO
2673-10uM / DMSO	_IYIDLNKDPENFLK_	1087	Specific	transcript=PF3D7_1219100.1	-1.18714	1.18714	4.6214e-15	1.41061e-13	63	transcript=PF3D7_1219100.1	NaN	gene=PF3D7_1219100 | organism=Plasmodium_falciparum_3D7 | gene_product=clathrin heavy chain, putative | transcript_product=clathrin heavy chain, putative | location=Pf3D7_12_v3:757649-763642(+) | protein_length=1997 | sequence_SO=chromosome | SO=protein_coding | is_pseudo=false	NaN	1	-56.0827	0.439173	2673-10uM	DMSO
2673-10uM / DMSO	_EVIIHPETNYALTG_	293	Unspecific	transcript=PF3D7_1311800.1	-0.57595	0.57595	4.67727e-15	1.42576e-13	36	transcript=PF3D7_1311800.1	NaN	gene=PF3D7_1311800 | organism=Plasmodium_falciparum_3D7 | gene_product=M1-family alanyl aminopeptidase | transcript_product=M1-family alanyl aminopeptidase | location=Pf3D7_13_v3:501790-505047(+) | protein_length=1085 | sequence_SO=chromosome | SO=protein_coding | is_pseudo=false	NaN	1	-32.9156	0.670844	2673-10uM	DMSO
2673-1uM / DMSO	_NVVLADTTISK_	51	Specific	transcript=PF3D7_0627500.1	0.466907	0.466907	4.87832e-15	1.48506e-13	54	transcript=PF3D7_0627500.1	NaN	gene=PF3D7_0627500 | organism=Plasmodium_falciparum_3D7 | gene_product=protein DJ-1 | transcript_product=protein DJ-1 | location=Pf3D7_06_v3:1101734-1102852(-) | protein_length=189 | sequence_SO=chromosome | SO=protein_coding | is_pseudo=false	NaN	1	38.2143	1.38214	2673-1uM	DMSO
2673-10uM / DMSO	_LPADVAEELATTAQK_	14	Specific	transcript=PF3D7_1444800.1	1.09269	1.09269	4.88885e-15	1.48629e-13	81	transcript=PF3D7_1444800.1	NaN	gene=PF3D7_1444800 | organism=Plasmodium_falciparum_3D7 | gene_product=fructose-bisphosphate aldolase | transcript_product=fructose-bisphosphate aldolase | location=Pf3D7_14_v3:1844041-1845617(-) | protein_length=369 | sequence_SO=chromosome | SO=protein_coding | is_pseudo=false	NaN	1	113.272	2.13272	2673-10uM	DMSO
2673-10uM / DMSO	_NLEHNHNNNQIDMNELSLK_	219	Specific-N	transcript=PF3D7_0918300.1	-1.28516	1.28516	5.01663e-15	1.52311e-13	27	transcript=PF3D7_0918300.1	NaN	gene=PF3D7_0918300 | organism=Plasmodium_falciparum_3D7 | gene_product=eukaryotic translation initiation factor 3 subunit F, putative | transcript_product=eukaryotic translation initiation factor 3 subunit F, putative | location=Pf3D7_09_v3:751358-752422(-) | protein_length=320 | sequence_SO=chromosome | SO=protein_coding | is_pseudo=false	NaN	1	-58.9676	0.410324	2673-10uM	DMSO
2673-10uM / DMSO	_WESLQPEPSHPY_	2126	Specific-N	P11277	0.339373	0.339373	5.14123e-15	1.55887e-13	54	P11277	SPTB	Spectrin beta chain, erythrocytic	SPTB1_HUMAN	1	26.5207	1.26521	2673-10uM	DMSO
2673-1uM / DMSO	_SLESGFLNIK_	159	Specific-N	transcript=PF3D7_0918300.1	-0.361833	0.361833	5.21101e-15	1.57794e-13	45	transcript=PF3D7_0918300.1	NaN	gene=PF3D7_0918300 | organism=Plasmodium_falciparum_3D7 | gene_product=eukaryotic translation initiation factor 3 subunit F, putative | transcript_product=eukaryotic translation initiation factor 3 subunit F, putative | location=Pf3D7_09_v3:751358-752422(-) | protein_length=320 | sequence_SO=chromosome | SO=protein_coding | is_pseudo=false	NaN	1	-22.1825	0.778175	2673-1uM	DMSO
2673-1uM / DMSO	_ALSPHISEETLNFHYN_	14	Unspecific	transcript=PF3D7_0814900.1	-1.48031	1.48031	5.25069e-15	1.58785e-13	54	transcript=PF3D7_0814900.1	NaN	gene=PF3D7_0814900 | organism=Plasmodium_falciparum_3D7 | gene_product=superoxide dismutase [Fe] | transcript_product=superoxide dismutase [Fe] | location=Pf3D7_08_v3:708228-708824(+) | protein_length=198 | sequence_SO=chromosome | SO=protein_coding | is_pseudo=false	NaN	1	-64.1589	0.358411	2673-1uM	DMSO
2673-10uM / DMSO	_YDSVHGQFPC[Carbamidomethyl (C)]EVTHADGFLLIGEK_	49	Specific	transcript=PF3D7_1462800.1	0.501118	0.501118	5.36428e-15	1.62005e-13	99	transcript=PF3D7_1462800.1	NaN	gene=PF3D7_1462800 | organism=Plasmodium_falciparum_3D7 | gene_product=glyceraldehyde-3-phosphate dehydrogenase | transcript_product=glyceraldehyde-3-phosphate dehydrogenase | location=Pf3D7_14_v3:2559098-2560347(+) | protein_length=337 | sequence_SO=chromosome | SO=protein_coding | is_pseudo=false	NaN	1	41.531	1.41531	2673-10uM	DMSO
2673-1uM / DMSO	_DVEHVIDIVDSF_	64	Unspecific	transcript=PF3D7_0511000.1	-0.517985	0.517985	5.40003e-15	1.62655e-13	81	transcript=PF3D7_0511000.1	NaN	gene=PF3D7_0511000 | organism=Plasmodium_falciparum_3D7 | gene_product=translationally-controlled tumor protein homolog | transcript_product=translationally-controlled tumor protein homolog | location=Pf3D7_05_v3:467585-468100(-) | protein_length=171 | sequence_SO=chromosome | SO=protein_coding | is_pseudo=false	NaN	1	-30.1653	0.698347	2673-1uM	DMSO
2673-10uM / DMSO	_IVVSAIVDK_	202	Specific	transcript=PF3D7_1306400.1	-0.520561	0.520561	5.39894e-15	1.62655e-13	108	transcript=PF3D7_1306400.1	NaN	gene=PF3D7_1306400 | organism=Plasmodium_falciparum_3D7 | gene_product=26S protease regulatory subunit 10B, putative | transcript_product=26S protease regulatory subunit 10B, putative | location=Pf3D7_13_v3:297178-298359(-) | protein_length=393 | sequence_SO=chromosome | SO=protein_coding | is_pseudo=false	NaN	1	-30.2899	0.697101	2673-10uM	DMSO
2673-10uM / DMSO	_ILYPIDHPDK_	496	Specific-N	transcript=PF3D7_0619400.1	0.823814	0.823814	5.54529e-15	1.66811e-13	54	transcript=PF3D7_0619400.1	NaN	gene=PF3D7_0619400 | organism=Plasmodium_falciparum_3D7 | gene_product=cell division cycle protein 48 homologue, putative | transcript_product=cell division cycle protein 48 homologue, putative | location=Pf3D7_06_v3:815622-818247(-) | protein_length=828 | sequence_SO=chromosome | SO=protein_coding | is_pseudo=false	NaN	1	77.008	1.77008	2673-10uM	DMSO
2673-1uM / DMSO	_NLLNEEDPC[Carbamidomethyl (C)]YINNSYVSVNVVC[Carbamidomethyl (C)]NK_	196	Specific	transcript=PF3D7_1420700.1	0.99078	0.99078	5.57287e-15	1.6742e-13	36	transcript=PF3D7_1420700.1	NaN	gene=PF3D7_1420700 | organism=Plasmodium_falciparum_3D7 | gene_product=surface protein P113 | transcript_product=surface protein P113 | location=Pf3D7_14_v3:860011-863080(+) | protein_length=969 | sequence_SO=chromosome | SO=protein_coding | is_pseudo=false	NaN	1	98.7259	1.98726	2673-1uM	DMSO
2673-10uM / DMSO	_IDDIIAIVEK_	327	Specific	transcript=PF3D7_1026000.1	-0.667708	0.667708	5.63509e-15	1.69067e-13	45	transcript=PF3D7_1026000.1	NaN	gene=PF3D7_1026000 | organism=Plasmodium_falciparum_3D7 | gene_product=conserved Plasmodium protein, unknown function | transcript_product=conserved Plasmodium protein, unknown function | location=Pf3D7_10_v3:1098455-1099882(-) | protein_length=363 | sequence_SO=chromosome | SO=protein_coding | is_pseudo=false	NaN	1	-37.0494	0.629506	2673-10uM	DMSO
2673-10uM / DMSO	_FDVVYTSVLK_	52	Specific	transcript=PF3D7_1120100.1	0.548661	0.548661	5.64712e-15	1.69206e-13	54	transcript=PF3D7_1120100.1	NaN	gene=PF3D7_1120100 | organism=Plasmodium_falciparum_3D7 | gene_product=phosphoglycerate mutase, putative | transcript_product=phosphoglycerate mutase, putative | location=Pf3D7_11_v3:761695-762818(+) | protein_length=250 | sequence_SO=chromosome | SO=protein_coding | is_pseudo=false	NaN	1	46.2727	1.46273	2673-10uM	DMSO
2673-10uM / DMSO	_GLDFEAILLQPGSPPDK_	481;481	Specific-N	C9JIF9;P13798	-0.278432	0.278432	5.71713e-15	1.7108e-13	108	C9JIF9;P13798	APEH	Acylamino-acid-releasing enzyme	C9JIF9_HUMAN;ACPH_HUMAN	1	-17.5513	0.824487	2673-10uM	DMSO
2673-1uM / DMSO	_EFTVAIEPDITVLDLK_	14	Specific	transcript=PF3D7_1113400.1	1.16751	1.16751	5.99455e-15	1.79147e-13	81	transcript=PF3D7_1113400.1	NaN	gene=PF3D7_1113400 | organism=Plasmodium_falciparum_3D7 | gene_product=ubiquitin domain-containing protein DSK2, putative | transcript_product=ubiquitin domain-containing protein DSK2, putative | location=Pf3D7_11_v3:521122-522824(-) | protein_length=388 | sequence_SO=chromosome | SO=protein_coding | is_pseudo=false	NaN	1	124.623	2.24623	2673-1uM	DMSO
2673-10uM / DMSO	_SSGPAVVEESHDPLTVL_	951	Unspecific	transcript=PF3D7_0930300.1	-0.54418	0.54418	6.08809e-15	1.81705e-13	54	transcript=PF3D7_0930300.1	NaN	gene=PF3D7_0930300 | organism=Plasmodium_falciparum_3D7 | gene_product=merozoite surface protein 1 | transcript_product=merozoite surface protein 1 | location=Pf3D7_09_v3:1201812-1206974(+) | protein_length=1720 | sequence_SO=chromosome | SO=protein_coding | is_pseudo=false	NaN	1	-31.4219	0.685781	2673-10uM	DMSO
2673-10uM / DMSO	_YITEYVTC[Carbamidomethyl (C)]QMC[Carbamidomethyl (C)]K_	161	Specific	transcript=PF3D7_1010600.1	0.44297	0.44297	6.30189e-15	1.87841e-13	54	transcript=PF3D7_1010600.1	NaN	gene=PF3D7_1010600 | organism=Plasmodium_falciparum_3D7 | gene_product=eukaryotic translation initiation factor 2 subunit beta | transcript_product=eukaryotic translation initiation factor 2 subunit beta | location=Pf3D7_10_v3:420185-421056(-) | protein_length=222 | sequence_SO=chromosome | SO=protein_coding | is_pseudo=false	NaN	1	35.94	1.3594	2673-10uM	DMSO
2673-1uM / DMSO	_EFTVAIEPDITVLDLKK_	14	Specific	transcript=PF3D7_1113400.1	2.19778	2.19778	6.33147e-15	1.88477e-13	54	transcript=PF3D7_1113400.1	NaN	gene=PF3D7_1113400 | organism=Plasmodium_falciparum_3D7 | gene_product=ubiquitin domain-containing protein DSK2, putative | transcript_product=ubiquitin domain-containing protein DSK2, putative | location=Pf3D7_11_v3:521122-522824(-) | protein_length=388 | sequence_SO=chromosome | SO=protein_coding | is_pseudo=false	NaN	1	358.774	4.58774	2673-1uM	DMSO
2673-10uM / DMSO	_REEDEQEANDVPDLVENFEEVSKE_	148	Specific	transcript=PF3D7_1426100.1	-1.4683	1.4683	6.37237e-15	1.89447e-13	54	transcript=PF3D7_1426100.1	NaN	gene=PF3D7_1426100 | organism=Plasmodium_falciparum_3D7 | gene_product=transcription factor BTF3, putative | transcript_product=transcription factor BTF3, putative | location=Pf3D7_14_v3:1018745-1019260(-) | protein_length=171 | sequence_SO=chromosome | SO=protein_coding | is_pseudo=false	NaN	1	-63.8592	0.361408	2673-10uM	DMSO
2673-1uM / DMSO	_MYEDILSHVNILK_	302	Specific	transcript=PF3D7_1223100.1	0.391082	0.391082	6.45882e-15	1.91768e-13	90	transcript=PF3D7_1223100.1	NaN	gene=PF3D7_1223100 | organism=Plasmodium_falciparum_3D7 | gene_product=cAMP-dependent protein kinase regulatory subunit | transcript_product=cAMP-dependent protein kinase regulatory subunit | location=Pf3D7_12_v3:927825-929991(-) | protein_length=441 | sequence_SO=chromosome | SO=protein_coding | is_pseudo=false	NaN	1	31.1376	1.31138	2673-1uM	DMSO
2673-1uM / DMSO	_VLSC[Carbamidomethyl (C)]VFK_	216	Specific	transcript=PF3D7_1444800.1	0.681734	0.681734	6.67001e-15	1.97782e-13	36	transcript=PF3D7_1444800.1	NaN	gene=PF3D7_1444800 | organism=Plasmodium_falciparum_3D7 | gene_product=fructose-bisphosphate aldolase | transcript_product=fructose-bisphosphate aldolase | location=Pf3D7_14_v3:1844041-1845617(-) | protein_length=369 | sequence_SO=chromosome | SO=protein_coding | is_pseudo=false	NaN	1	60.4067	1.60407	2673-1uM	DMSO
2673-1uM / DMSO	_LLGNVLVC[Carbamidomethyl (C)]_	106	Specific-C	P02042	-0.319424	0.319424	6.6918e-15	1.98065e-13	54	P02042	HBD	Hemoglobin subunit delta	HBD_HUMAN	1	-19.861	0.80139	2673-1uM	DMSO
2673-10uM / DMSO	_AC[Carbamidomethyl (C)]PC[Carbamidomethyl (C)]NANEVVDNVINKG_	302	Unspecific	transcript=PF3D7_1116700.1	0.621426	0.621426	6.69688e-15	1.98065e-13	45	transcript=PF3D7_1116700.1	NaN	gene=PF3D7_1116700 | organism=Plasmodium_falciparum_3D7 | gene_product=dipeptidyl aminopeptidase 1 | transcript_product=dipeptidyl aminopeptidase 1 | location=Pf3D7_11_v3:630779-632881(-) | protein_length=700 | sequence_SO=chromosome | SO=protein_coding | is_pseudo=false	NaN	1	53.8395	1.53839	2673-10uM	DMSO
2673-10uM / DMSO	_DLSEPFPF_	389	Unspecific	transcript=PF3D7_1420400.1	0.538604	0.538604	6.72485e-15	1.98635e-13	45	transcript=PF3D7_1420400.1	NaN	gene=PF3D7_1420400 | organism=Plasmodium_falciparum_3D7 | gene_product=glycine--tRNA ligase | transcript_product=glycine--tRNA ligase | location=Pf3D7_14_v3:846508-849177(+) | protein_length=889 | sequence_SO=chromosome | SO=protein_coding | is_pseudo=false	NaN	1	45.2566	1.45257	2673-10uM	DMSO
2673-10uM / DMSO	_LPHFIDSNLEQIK_	111	Specific	transcript=PF3D7_1317100.1	0.84109	0.84109	6.74942e-15	1.99103e-13	108	transcript=PF3D7_1317100.1	NaN	gene=PF3D7_1317100 | organism=Plasmodium_falciparum_3D7 | gene_product=DNA replication licensing factor MCM4 | transcript_product=DNA replication licensing factor MCM4 | location=Pf3D7_13_v3:711944-714961(+) | protein_length=1005 | sequence_SO=chromosome | SO=protein_coding | is_pseudo=false	NaN	1	79.1403	1.7914	2673-10uM	DMSO
2673-1uM / DMSO	_LITTLC[Carbamidomethyl (C)]AEK_	71	Specific	transcript=PF3D7_0307100.1	0.986309	0.986309	7.15027e-15	2.10656e-13	45	transcript=PF3D7_0307100.1	NaN	gene=PF3D7_0307100 | organism=Plasmodium_falciparum_3D7 | gene_product=40S ribosomal protein S12, putative | transcript_product=40S ribosomal protein S12, putative | location=Pf3D7_03_v3:312693-313342(-) | protein_length=141 | sequence_SO=chromosome | SO=protein_coding | is_pseudo=false	NaN	1	98.111	1.98111	2673-1uM	DMSO
2673-1uM / DMSO	_SFIMIKPDGVQR_	4	Specific	transcript=PF3D7_1366500.1	0.43423	0.43423	7.17486e-15	2.11109e-13	99	transcript=PF3D7_1366500.1	NaN	gene=PF3D7_1366500 | organism=Plasmodium_falciparum_3D7 | gene_product=nucleoside diphosphate kinase | transcript_product=nucleoside diphosphate kinase | location=Pf3D7_13_v3:2661573-2662022(+) | protein_length=149 | sequence_SO=chromosome | SO=protein_coding | is_pseudo=false	NaN	1	35.1189	1.35119	2673-1uM	DMSO
2673-10uM / DMSO	_EELDGIDPSNIIDTTTRPR_	284	Specific	transcript=PF3D7_1140200.1	-0.715361	0.715361	7.21192e-15	2.11927e-13	45	transcript=PF3D7_1140200.1	NaN	gene=PF3D7_1140200 | organism=Plasmodium_falciparum_3D7 | gene_product=conserved Plasmodium protein, unknown function | transcript_product=conserved Plasmodium protein, unknown function | location=Pf3D7_11_v3:1601257-1603078(-) | protein_length=447 | sequence_SO=chromosome | SO=protein_coding | is_pseudo=false	NaN	1	-39.0947	0.609053	2673-10uM	DMSO
2673-10uM / DMSO	_KPLFIPISVGL_	685	Specific-C	transcript=PF3D7_1311800.1	-0.927389	0.927389	7.35477e-15	2.1557e-13	54	transcript=PF3D7_1311800.1	NaN	gene=PF3D7_1311800 | organism=Plasmodium_falciparum_3D7 | gene_product=M1-family alanyl aminopeptidase | transcript_product=M1-family alanyl aminopeptidase | location=Pf3D7_13_v3:501790-505047(+) | protein_length=1085 | sequence_SO=chromosome | SO=protein_coding | is_pseudo=false	NaN	1	-47.4191	0.525809	2673-10uM	DMSO
2673-1uM / DMSO	_DGFNPADVEAGLY_	212	Specific-C	Q13228	-0.346685	0.346685	7.36691e-15	2.15649e-13	54	Q13228	SELENBP1	Selenium-binding protein 1	SBP1_HUMAN	1	-21.3611	0.786389	2673-1uM	DMSO
2673-1uM / DMSO	_VIIHPETNYALT_	294	Unspecific	transcript=PF3D7_1311800.1	-0.627405	0.627405	7.45937e-15	2.18077e-13	45	transcript=PF3D7_1311800.1	NaN	gene=PF3D7_1311800 | organism=Plasmodium_falciparum_3D7 | gene_product=M1-family alanyl aminopeptidase | transcript_product=M1-family alanyl aminopeptidase | location=Pf3D7_13_v3:501790-505047(+) | protein_length=1085 | sequence_SO=chromosome | SO=protein_coding | is_pseudo=false	NaN	1	-35.266	0.64734	2673-1uM	DMSO
2673-1uM / DMSO	_ALDVMVSTFHK_	8	Specific	P26447	0.592428	0.592428	7.77932e-15	2.2714e-13	81	P26447	S100A4	Protein S100-A4	S10A4_HUMAN	1	50.7783	1.50778	2673-1uM	DMSO
2673-10uM / DMSO	_SIPIIIGQ_	154	Specific-C	transcript=PF3D7_0605100.1	0.686006	0.686006	7.88022e-15	2.29793e-13	45	transcript=PF3D7_0605100.1	NaN	gene=PF3D7_0605100 | organism=Plasmodium_falciparum_3D7 | gene_product=RNA-binding protein, putative | transcript_product=RNA-binding protein, putative | location=Pf3D7_06_v3:217240-219507(+) | protein_length=755 | sequence_SO=chromosome | SO=protein_coding | is_pseudo=false	NaN	1	60.8823	1.60882	2673-10uM	DMSO
2673-1uM / DMSO	_GSNTISEC[Carbamidomethyl (C)]SEFIDMLK_	78	Specific	transcript=PF3D7_0627500.1	0.369196	0.369196	7.96411e-15	2.31943e-13	54	transcript=PF3D7_0627500.1	NaN	gene=PF3D7_0627500 | organism=Plasmodium_falciparum_3D7 | gene_product=protein DJ-1 | transcript_product=protein DJ-1 | location=Pf3D7_06_v3:1101734-1102852(-) | protein_length=189 | sequence_SO=chromosome | SO=protein_coding | is_pseudo=false	NaN	1	29.1633	1.29163	2673-1uM	DMSO
2673-1uM / DMSO	_GILPYLGPDGK_	164	Specific-N	transcript=PF3D7_0922200.1	-0.34686	0.34686	7.97913e-15	2.32085e-13	54	transcript=PF3D7_0922200.1	NaN	gene=PF3D7_0922200 | organism=Plasmodium_falciparum_3D7 | gene_product=S-adenosylmethionine synthetase | transcript_product=S-adenosylmethionine synthetase | location=Pf3D7_09_v3:903362-904570(+) | protein_length=402 | sequence_SO=chromosome | SO=protein_coding | is_pseudo=false	NaN	1	-21.3707	0.786293	2673-1uM	DMSO
2673-1uM / DMSO	_VPIGTVSVVDLVC[Carbamidomethyl (C)]R_	238	Specific	transcript=PF3D7_1462800.1	0.382168	0.382168	8.0014e-15	2.32437e-13	108	transcript=PF3D7_1462800.1	NaN	gene=PF3D7_1462800 | organism=Plasmodium_falciparum_3D7 | gene_product=glyceraldehyde-3-phosphate dehydrogenase | transcript_product=glyceraldehyde-3-phosphate dehydrogenase | location=Pf3D7_14_v3:2559098-2560347(+) | protein_length=337 | sequence_SO=chromosome | SO=protein_coding | is_pseudo=false	NaN	1	30.3299	1.3033	2673-1uM	DMSO
2673-1uM / DMSO	_MEENLSEPVHC[Carbamidomethyl (C)]V_	2062	Specific-C	P02549	0.451453	0.451453	8.05904e-15	2.33814e-13	45	P02549	SPTA1	Spectrin alpha chain, erythrocytic 1	SPTA1_HUMAN	1	36.7416	1.36742	2673-1uM	DMSO
2673-10uM / DMSO	_NTNITSVGVK_	34	Specific	transcript=PF3D7_0807500.1	1.32015	1.32015	8.09157e-15	2.34185e-13	36	transcript=PF3D7_0807500.1	NaN	gene=PF3D7_0807500 | organism=Plasmodium_falciparum_3D7 | gene_product=proteasome subunit alpha type-6, putative | transcript_product=proteasome subunit alpha type-6, putative | location=Pf3D7_08_v3:387219-388364(+) | protein_length=260 | sequence_SO=chromosome | SO=protein_coding | is_pseudo=false	NaN	1	149.692	2.49692	2673-10uM	DMSO
2673-10uM / DMSO	_ISGLIYEEIR_	47	Specific	transcript=PF3D7_1105000.1	0.391115	0.391115	8.0923e-15	2.34185e-13	45	transcript=PF3D7_1105000.1	NaN	gene=PF3D7_1105000 | organism=Plasmodium_falciparum_3D7 | gene_product=histone H4 | transcript_product=histone H4 | location=Pf3D7_11_v3:221818-222129(-) | protein_length=103 | sequence_SO=chromosome | SO=protein_coding | is_pseudo=false	NaN	1	31.1407	1.31141	2673-10uM	DMSO
2673-10uM / DMSO	_DFEAILLQPGSPPDK_	483;483	Specific-N	C9JIF9;P13798	-0.350831	0.350831	8.11773e-15	2.34624e-13	54	C9JIF9;P13798	APEH	Acylamino-acid-releasing enzyme	C9JIF9_HUMAN;ACPH_HUMAN	1	-21.5867	0.784133	2673-10uM	DMSO
2673-10uM / DMSO	_VQDQAIEQAIEETAEQK_	72	Specific	transcript=PF3D7_1107000.1	-0.652177	0.652177	8.15375e-15	2.35368e-13	81	transcript=PF3D7_1107000.1	NaN	gene=PF3D7_1107000 | organism=Plasmodium_falciparum_3D7 | gene_product=U6 snRNA-associated Sm-like protein LSm4, putative | transcript_product=U6 snRNA-associated Sm-like protein LSm4, putative | location=Pf3D7_11_v3:291680-292502(+) | protein_length=126 | sequence_SO=chromosome | SO=protein_coding | is_pseudo=false	NaN	1	-36.3681	0.636319	2673-10uM	DMSO
2673-10uM / DMSO	_NLNPAINPNIR_	138	Specific	transcript=PF3D7_1414800.1	-0.215206	0.215206	8.39098e-15	2.4191e-13	54	transcript=PF3D7_1414800.1	NaN	gene=PF3D7_1414800 | organism=Plasmodium_falciparum_3D7 | gene_product=small nuclear ribonucleoprotein-associated protein B, putative | transcript_product=small nuclear ribonucleoprotein-associated protein B, putative | location=Pf3D7_14_v3:599763-600680(-) | protein_length=201 | sequence_SO=chromosome | SO=protein_coding | is_pseudo=false	NaN	1	-13.8577	0.861423	2673-10uM	DMSO
2673-10uM / DMSO	_EVIEKPSEDYSDIGGL_	176	Unspecific	transcript=PF3D7_1130400.1	0.740521	0.740521	8.70473e-15	2.50639e-13	45	transcript=PF3D7_1130400.1	NaN	gene=PF3D7_1130400 | organism=Plasmodium_falciparum_3D7 | gene_product=26S protease regulatory subunit 6A, putative | transcript_product=26S protease regulatory subunit 6A, putative | location=Pf3D7_11_v3:1168879-1170198(+) | protein_length=439 | sequence_SO=chromosome | SO=protein_coding | is_pseudo=false	NaN	1	67.0779	1.67078	2673-10uM	DMSO
2673-1uM / DMSO	_PLGYIMSNYDYQK_	35	Specific	transcript=PF3D7_1229400.1	1.62571	1.62571	8.74955e-15	2.51613e-13	36	transcript=PF3D7_1229400.1	NaN	gene=PF3D7_1229400 | organism=Plasmodium_falciparum_3D7 | gene_product=macrophage migration inhibitory factor | transcript_product=macrophage migration inhibitory factor | location=Pf3D7_12_v3:1208912-1209542(+) | protein_length=116 | sequence_SO=chromosome | SO=protein_coding | is_pseudo=false	NaN	1	208.595	3.08595	2673-1uM	DMSO
2673-10uM / DMSO	_KNNDDEQYVW_	139	Unspecific	transcript=PF3D7_0708400.1	2.92324	2.92324	8.94953e-15	2.5704e-13	27	transcript=PF3D7_0708400.1	NaN	gene=PF3D7_0708400 | organism=Plasmodium_falciparum_3D7 | gene_product=heat shock protein 90 | transcript_product=heat shock protein 90 | location=Pf3D7_07_v3:381592-384614(+) | protein_length=745 | sequence_SO=chromosome | SO=protein_coding | is_pseudo=false	NaN	1	658.55	7.5855	2673-10uM	DMSO
2673-10uM / DMSO	_NIHEEILTPALNK_	231	Specific-N	transcript=PF3D7_0317000.1	-0.329469	0.329469	9.03312e-15	2.59116e-13	108	transcript=PF3D7_0317000.1	NaN	gene=PF3D7_0317000 | organism=Plasmodium_falciparum_3D7 | gene_product=proteasome subunit alpha type-3, putative | transcript_product=proteasome subunit alpha type-3, putative | location=Pf3D7_03_v3:682795-683685(-) | protein_length=252 | sequence_SO=chromosome | SO=protein_coding | is_pseudo=false	NaN	1	-20.4171	0.795829	2673-10uM	DMSO
2673-10uM / DMSO	_VEEEELVTEEVIER_	1363	Specific	transcript=PF3D7_1149000.1	-0.5826	0.5826	9.05566e-15	2.59437e-13	81	transcript=PF3D7_1149000.1	NaN	gene=PF3D7_1149000 | organism=Plasmodium_falciparum_3D7 | gene_product=antigen 332, DBL-like protein | transcript_product=antigen 332, DBL-like protein | location=Pf3D7_11_v3:1950210-1968726(+) | protein_length=6093 | sequence_SO=chromosome | SO=protein_coding | is_pseudo=false	NaN	1	-33.2241	0.667759	2673-10uM	DMSO
2673-10uM / DMSO	_C[Carbamidomethyl (C)]GSLQPDLIK_	92	Specific-N	transcript=PF3D7_0513300.1	0.641211	0.641211	9.08771e-15	2.60029e-13	45	transcript=PF3D7_0513300.1	NaN	gene=PF3D7_0513300 | organism=Plasmodium_falciparum_3D7 | gene_product=purine nucleoside phosphorylase | transcript_product=purine nucleoside phosphorylase | location=Pf3D7_05_v3:569182-569919(-) | protein_length=245 | sequence_SO=chromosome | SO=protein_coding | is_pseudo=false	NaN	1	55.9638	1.55964	2673-10uM	DMSO
2673-10uM / DMSO	_VGNILPIGK_	98	Specific-N	transcript=PF3D7_0516900.1	1.30934	1.30934	9.17719e-15	2.62144e-13	99	transcript=PF3D7_0516900.1	NaN	gene=PF3D7_0516900 | organism=Plasmodium_falciparum_3D7 | gene_product=60S ribosomal protein L2 | transcript_product=60S ribosomal protein L2 | location=Pf3D7_05_v3:712762-713772(-) | protein_length=260 | sequence_SO=chromosome | SO=protein_coding | is_pseudo=false	NaN	1	147.828	2.47828	2673-10uM	DMSO
2673-10uM / DMSO	_LVPGFETC[Carbamidomethyl (C)]QK_	356	Specific	transcript=PF3D7_0922600.1	0.867253	0.867253	9.18454e-15	2.62144e-13	36	transcript=PF3D7_0922600.1	NaN	gene=PF3D7_0922600 | organism=Plasmodium_falciparum_3D7 | gene_product=glutamine synthetase, putative | transcript_product=glutamine synthetase, putative | location=Pf3D7_09_v3:916603-918674(+) | protein_length=543 | sequence_SO=chromosome | SO=protein_coding | is_pseudo=false	NaN	1	82.4186	1.82419	2673-10uM	DMSO
2673-10uM / DMSO	_ELNIPTGVPL_	205	Unspecific	transcript=PF3D7_1120100.1	-0.538291	0.538291	9.44098e-15	2.69127e-13	54	transcript=PF3D7_1120100.1	NaN	gene=PF3D7_1120100 | organism=Plasmodium_falciparum_3D7 | gene_product=phosphoglycerate mutase, putative | transcript_product=phosphoglycerate mutase, putative | location=Pf3D7_11_v3:761695-762818(+) | protein_length=250 | sequence_SO=chromosome | SO=protein_coding | is_pseudo=false	NaN	1	-31.1414	0.688586	2673-10uM	DMSO
2673-1uM / DMSO	_DTDVYALFLSNC[Carbamidomethyl (C)]LDSK_	340	Specific	transcript=PF3D7_1215900.1	0.727653	0.727653	9.47508e-15	2.69763e-13	45	transcript=PF3D7_1215900.1	NaN	gene=PF3D7_1215900 | organism=Plasmodium_falciparum_3D7 | gene_product=serpentine receptor, putative | transcript_product=serpentine receptor, putative | location=Pf3D7_12_v3:641552-643519(+) | protein_length=655 | sequence_SO=chromosome | SO=protein_coding | is_pseudo=false	NaN	1	65.5942	1.65594	2673-1uM	DMSO
2673-10uM / DMSO	_AASTILSNILYQYK_	138	Specific	transcript=PF3D7_1011400.1	1.0594	1.0594	9.48821e-15	2.698e-13	54	transcript=PF3D7_1011400.1	NaN	gene=PF3D7_1011400 | organism=Plasmodium_falciparum_3D7 | gene_product=proteasome subunit beta type-5 | transcript_product=proteasome subunit beta type-5 | location=Pf3D7_10_v3:441140-441955(-) | protein_length=271 | sequence_SO=chromosome | SO=protein_coding | is_pseudo=false	NaN	1	108.406	2.08406	2673-10uM	DMSO
2673-1uM / DMSO	_DIQTLYEILR_	61	Specific-N	transcript=PF3D7_0108000.1	-0.447025	0.447025	9.60354e-15	2.72741e-13	54	transcript=PF3D7_0108000.1	NaN	gene=PF3D7_0108000 | organism=Plasmodium_falciparum_3D7 | gene_product=proteasome subunit beta type-3, putative | transcript_product=proteasome subunit beta type-3, putative | location=Pf3D7_01_v3:328431-329558(-) | protein_length=218 | sequence_SO=chromosome | SO=protein_coding | is_pseudo=false	NaN	1	-26.6446	0.733554	2673-1uM	DMSO
2673-10uM / DMSO	_YLTNLFGYDK_	96	Specific	transcript=PF3D7_0608800.1	0.51099	0.51099	1.01155e-14	2.86925e-13	54	transcript=PF3D7_0608800.1	NaN	gene=PF3D7_0608800 | organism=Plasmodium_falciparum_3D7 | gene_product=ornithine aminotransferase | transcript_product=ornithine aminotransferase | location=Pf3D7_06_v3:362635-363879(+) | protein_length=414 | sequence_SO=chromosome | SO=protein_coding | is_pseudo=false	NaN	1	42.5027	1.42503	2673-10uM	DMSO
2673-1uM / DMSO	_TSDVRPELTLAAFK_	231	Specific	transcript=PF3D7_1355100.1	0.629416	0.629416	1.01885e-14	2.88636e-13	72	transcript=PF3D7_1355100.1	NaN	gene=PF3D7_1355100 | organism=Plasmodium_falciparum_3D7 | gene_product=DNA replication licensing factor MCM6 | transcript_product=DNA replication licensing factor MCM6 | location=Pf3D7_13_v3:2187435-2190224(+) | protein_length=929 | sequence_SO=chromosome | SO=protein_coding | is_pseudo=false	NaN	1	54.6939	1.54694	2673-1uM	DMSO
2673-10uM / DMSO	_MLFVGELVK_	2812	Specific-N	transcript=PF3D7_1107300.1	-0.467335	0.467335	1.04861e-14	2.96701e-13	54	transcript=PF3D7_1107300.1	NaN	gene=PF3D7_1107300 | organism=Plasmodium_falciparum_3D7 | gene_product=polyadenylate-binding protein-interacting protein 1, putative | transcript_product=polyadenylate-binding protein-interacting protein 1, putative | location=Pf3D7_11_v3:301283-311287(-) | protein_length=3334 | sequence_SO=chromosome | SO=protein_coding | is_pseudo=false	NaN	1	-27.67	0.7233	2673-10uM	DMSO
2673-10uM / DMSO	_AIHDGVIEGTIDYENQYVESK_	410	Specific	transcript=PF3D7_1338100.1	0.339654	0.339654	1.05027e-14	2.96801e-13	54	transcript=PF3D7_1338100.1	NaN	gene=PF3D7_1338100 | organism=Plasmodium_falciparum_3D7 | gene_product=26S proteasome regulatory subunit RPN3, putative | transcript_product=26S proteasome regulatory subunit RPN3, putative | location=Pf3D7_13_v3:1542080-1543981(+) | protein_length=503 | sequence_SO=chromosome | SO=protein_coding | is_pseudo=false	NaN	1	26.5453	1.26545	2673-10uM	DMSO
2673-10uM / DMSO	_SLGLSGQVLYK_	125	Specific	transcript=PF3D7_0932300.1	0.640913	0.640913	1.08505e-14	3.06251e-13	36	transcript=PF3D7_0932300.1	NaN	gene=PF3D7_0932300 | organism=Plasmodium_falciparum_3D7 | gene_product=M18 aspartyl aminopeptidase | transcript_product=M18 aspartyl aminopeptidase | location=Pf3D7_09_v3:1289315-1291027(-) | protein_length=570 | sequence_SO=chromosome | SO=protein_coding | is_pseudo=false	NaN	1	55.9316	1.55932	2673-10uM	DMSO
2673-10uM / DMSO	_ISSTLIEK_	54	Specific	transcript=PF3D7_0727400.1	0.783959	0.783959	1.10359e-14	3.111e-13	36	transcript=PF3D7_0727400.1	NaN	gene=PF3D7_0727400 | organism=Plasmodium_falciparum_3D7 | gene_product=proteasome subunit alpha type-5, putative | transcript_product=proteasome subunit alpha type-5, putative | location=Pf3D7_07_v3:1162710-1163831(+) | protein_length=256 | sequence_SO=chromosome | SO=protein_coding | is_pseudo=false	NaN	1	72.1849	1.72185	2673-10uM	DMSO
2673-10uM / DMSO	_SLQLTNTHPVATPVNW_	163	Specific-C	transcript=PF3D7_0802200.1	0.445219	0.445219	1.11353e-14	3.13468e-13	45	transcript=PF3D7_0802200.1	NaN	gene=PF3D7_0802200 | organism=Plasmodium_falciparum_3D7 | gene_product=1-cys peroxiredoxin | transcript_product=1-cys peroxiredoxin | location=Pf3D7_08_v3:165416-166078(+) | protein_length=220 | sequence_SO=chromosome | SO=protein_coding | is_pseudo=false	NaN	1	36.1521	1.36152	2673-10uM	DMSO
2673-1uM / DMSO	_LVPGFETC[Carbamidomethyl (C)]QK_	356	Specific	transcript=PF3D7_0922600.1	0.892154	0.892154	1.11473e-14	3.13468e-13	36	transcript=PF3D7_0922600.1	NaN	gene=PF3D7_0922600 | organism=Plasmodium_falciparum_3D7 | gene_product=glutamine synthetase, putative | transcript_product=glutamine synthetase, putative | location=Pf3D7_09_v3:916603-918674(+) | protein_length=543 | sequence_SO=chromosome | SO=protein_coding | is_pseudo=false	NaN	1	85.5945	1.85594	2673-1uM	DMSO
2673-1uM / DMSO	_IAEEAGAIGVM[Oxidation (M)]VLENIPSELR_	35	Specific	transcript=PF3D7_0621200.1	0.791959	0.791959	1.14187e-14	3.20643e-13	45	transcript=PF3D7_0621200.1	NaN	gene=PF3D7_0621200 | organism=Plasmodium_falciparum_3D7 | gene_product=pyridoxine biosynthesis protein PDX1 | transcript_product=pyridoxine biosynthesis protein PDX1 | location=Pf3D7_06_v3:871297-872202(-) | protein_length=301 | sequence_SO=chromosome | SO=protein_coding | is_pseudo=false	NaN	1	73.1423	1.73142	2673-1uM	DMSO
2673-10uM / DMSO	_RVSPEEHPVLLT_	95	Unspecific	transcript=PF3D7_1412500.1	-0.335406	0.335406	1.14305e-14	3.20643e-13	81	transcript=PF3D7_1412500.1	NaN	gene=PF3D7_1412500 | organism=Plasmodium_falciparum_3D7 | gene_product=actin II | transcript_product=actin II | location=Pf3D7_14_v3:507360-508868(+) | protein_length=376 | sequence_SO=chromosome | SO=protein_coding | is_pseudo=false	NaN	1	-20.7439	0.792561	2673-10uM	DMSO
2673-10uM / DMSO	_IHEEQDNILPNVK_	362	Specific	transcript=PF3D7_1409600.1	-0.572085	0.572085	1.16493e-14	3.2638e-13	54	transcript=PF3D7_1409600.1	NaN	gene=PF3D7_1409600 | organism=Plasmodium_falciparum_3D7 | gene_product=conserved Plasmodium protein, unknown function | transcript_product=conserved Plasmodium protein, unknown function | location=Pf3D7_14_v3:374800-377106(+) | protein_length=768 | sequence_SO=chromosome | SO=protein_coding | is_pseudo=false	NaN	1	-32.7356	0.672644	2673-10uM	DMSO
2673-10uM / DMSO	_VHNDEKPEAPVENVVEDLK_	10	Specific	transcript=PF3D7_1419700.1	-0.417526	0.417526	1.16637e-14	3.26382e-13	54	transcript=PF3D7_1419700.1	NaN	gene=PF3D7_1419700 | organism=Plasmodium_falciparum_3D7 | gene_product=conserved Plasmodium protein, unknown function | transcript_product=conserved Plasmodium protein, unknown function | location=Pf3D7_14_v3:820068-821597(+) | protein_length=509 | sequence_SO=chromosome | SO=protein_coding | is_pseudo=false	NaN	1	-25.1293	0.748707	2673-10uM	DMSO
2673-10uM / DMSO	_IYVVDVGSEPR_	104	Specific	Q13228	0.284156	0.284156	1.16904e-14	3.26732e-13	54	Q13228	SELENBP1	Selenium-binding protein 1	SBP1_HUMAN	1	21.7698	1.2177	2673-10uM	DMSO
2673-10uM / DMSO	_VFSTFLK_	282	Specific	transcript=PF3D7_1129100.1	0.315638	0.315638	1.18742e-14	3.31238e-13	54	transcript=PF3D7_1129100.1	NaN	gene=PF3D7_1129100 | organism=Plasmodium_falciparum_3D7 | gene_product=parasitophorous vacuolar protein 1 | transcript_product=parasitophorous vacuolar protein 1 | location=Pf3D7_11_v3:1125952-1127310(+) | protein_length=452 | sequence_SO=chromosome | SO=protein_coding | is_pseudo=false	NaN	1	24.4562	1.24456	2673-10uM	DMSO
2673-10uM / DMSO	_SEFISFPIK_	198	Specific-N	transcript=PF3D7_0708400.1	0.570718	0.570718	1.24296e-14	3.46122e-13	54	transcript=PF3D7_0708400.1	NaN	gene=PF3D7_0708400 | organism=Plasmodium_falciparum_3D7 | gene_product=heat shock protein 90 | transcript_product=heat shock protein 90 | location=Pf3D7_07_v3:381592-384614(+) | protein_length=745 | sequence_SO=chromosome | SO=protein_coding | is_pseudo=false	NaN	1	48.5263	1.48526	2673-10uM	DMSO
2673-10uM / DMSO	_MSITSDNILK_	31	Specific	transcript=PF3D7_1103100.1	0.903856	0.903856	1.24625e-14	3.46614e-13	54	transcript=PF3D7_1103100.1	NaN	gene=PF3D7_1103100 | organism=Plasmodium_falciparum_3D7 | gene_product=60S acidic ribosomal protein P1, putative | transcript_product=60S acidic ribosomal protein P1, putative | location=Pf3D7_11_v3:140048-140801(-) | protein_length=118 | sequence_SO=chromosome | SO=protein_coding | is_pseudo=false	NaN	1	87.1061	1.87106	2673-10uM	DMSO
2673-10uM / DMSO	_FHTDEILATVMLK_	61	Specific	transcript=PF3D7_0626700.1	0.745438	0.745438	1.26085e-14	3.50251e-13	54	transcript=PF3D7_0626700.1	NaN	gene=PF3D7_0626700 | organism=Plasmodium_falciparum_3D7 | gene_product=ATPase | transcript_product=ATPase | location=Pf3D7_06_v3:1075018-1076136(+) | protein_length=372 | sequence_SO=chromosome | SO=protein_coding | is_pseudo=false	NaN	1	67.6483	1.67648	2673-10uM	DMSO
2673-1uM / DMSO	_SEQFINLR_	474	Specific	P07384	0.395529	0.395529	1.28054e-14	3.54857e-13	54	P07384	CAPN1	Calpain-1 catalytic subunit	CAN1_HUMAN	1	31.5425	1.31542	2673-1uM	DMSO
2673-10uM / DMSO	_FTLPENVSEDEIK_	171	Specific-N	transcript=PF3D7_1304500.1	0.562559	0.562559	1.27958e-14	3.54857e-13	45	transcript=PF3D7_1304500.1	NaN	gene=PF3D7_1304500 | organism=Plasmodium_falciparum_3D7 | gene_product=small heat shock protein, putative | transcript_product=small heat shock protein, putative | location=Pf3D7_13_v3:235800-236435(-) | protein_length=211 | sequence_SO=chromosome | SO=protein_coding | is_pseudo=false	NaN	1	47.6886	1.47689	2673-10uM	DMSO
2673-10uM / DMSO	_SPYNPAPSIPIK_	44	Specific-N	transcript=PF3D7_1409800.1	0.291906	0.291906	1.29234e-14	3.57692e-13	54	transcript=PF3D7_1409800.1	NaN	gene=PF3D7_1409800 | organism=Plasmodium_falciparum_3D7 | gene_product=CUGBP Elav-like family member 2, putative | transcript_product=CUGBP Elav-like family member 2, putative | location=Pf3D7_14_v3:383188-384732(+) | protein_length=514 | sequence_SO=chromosome | SO=protein_coding | is_pseudo=false	NaN	1	22.4257	1.22426	2673-10uM	DMSO
2673-1uM / DMSO	_M[Oxidation (M)]IVPVGAPSFK_	177	Specific-N	transcript=PF3D7_1015900.1	-0.411731	0.411731	1.29468e-14	3.57907e-13	45	transcript=PF3D7_1015900.1	NaN	gene=PF3D7_1015900 | organism=Plasmodium_falciparum_3D7 | gene_product=enolase | transcript_product=enolase | location=Pf3D7_10_v3:637138-639011(+) | protein_length=446 | sequence_SO=chromosome | SO=protein_coding | is_pseudo=false	NaN	1	-24.8279	0.751721	2673-1uM	DMSO
2673-10uM / DMSO	_ALSNIIPASTGAAK_	205	Specific-N	transcript=PF3D7_1462800.1	0.341202	0.341202	1.30277e-14	3.59709e-13	54	transcript=PF3D7_1462800.1	NaN	gene=PF3D7_1462800 | organism=Plasmodium_falciparum_3D7 | gene_product=glyceraldehyde-3-phosphate dehydrogenase | transcript_product=glyceraldehyde-3-phosphate dehydrogenase | location=Pf3D7_14_v3:2559098-2560347(+) | protein_length=337 | sequence_SO=chromosome | SO=protein_coding | is_pseudo=false	NaN	1	26.6811	1.26681	2673-10uM	DMSO
2673-1uM / DMSO	_FFLNTVK_	14	Specific	transcript=PF3D7_1034900.1	0.634006	0.634006	1.35318e-14	3.73179e-13	45	transcript=PF3D7_1034900.1	NaN	gene=PF3D7_1034900 | organism=Plasmodium_falciparum_3D7 | gene_product=methionine--tRNA ligase | transcript_product=methionine--tRNA ligase | location=Pf3D7_10_v3:1383450-1386119(+) | protein_length=889 | sequence_SO=chromosome | SO=protein_coding | is_pseudo=false	NaN	1	55.1868	1.55187	2673-1uM	DMSO
2673-10uM / DMSO	_DGALVVVDTIEGV_	117	Unspecific	transcript=PF3D7_1451100.1	-0.587518	0.587518	1.35719e-14	3.73833e-13	36	transcript=PF3D7_1451100.1	NaN	gene=PF3D7_1451100 | organism=Plasmodium_falciparum_3D7 | gene_product=elongation factor 2 | transcript_product=elongation factor 2 | location=Pf3D7_14_v3:2090902-2093400(+) | protein_length=832 | sequence_SO=chromosome | SO=protein_coding | is_pseudo=false	NaN	1	-33.4513	0.665487	2673-10uM	DMSO
2673-1uM / DMSO	_IILPQTALNALAR_	45	Specific	transcript=PF3D7_1418000.1	0.721985	0.721985	1.36321e-14	3.75038e-13	36	transcript=PF3D7_1418000.1	NaN	gene=PF3D7_1418000 | organism=Plasmodium_falciparum_3D7 | gene_product=ubiquitin fusion degradation protein 1, putative | transcript_product=ubiquitin fusion degradation protein 1, putative | location=Pf3D7_14_v3:759360-761422(-) | protein_length=282 | sequence_SO=chromosome | SO=protein_coding | is_pseudo=false	NaN	1	64.945	1.64945	2673-1uM	DMSO
2673-10uM / DMSO	_VNYSLDEYNTYLK_	146	Specific	transcript=PF3D7_0922600.1	0.636624	0.636624	1.36491e-14	3.75055e-13	45	transcript=PF3D7_0922600.1	NaN	gene=PF3D7_0922600 | organism=Plasmodium_falciparum_3D7 | gene_product=glutamine synthetase, putative | transcript_product=glutamine synthetase, putative | location=Pf3D7_09_v3:916603-918674(+) | protein_length=543 | sequence_SO=chromosome | SO=protein_coding | is_pseudo=false	NaN	1	55.4687	1.55469	2673-10uM	DMSO
2673-1uM / DMSO	_AGEDVSIPNLNSLYT_	231	Unspecific	transcript=PF3D7_1029600.1	-2.08514	2.08514	1.38722e-14	3.80727e-13	27	transcript=PF3D7_1029600.1	NaN	gene=PF3D7_1029600 | organism=Plasmodium_falciparum_3D7 | gene_product=adenosine deaminase | transcript_product=adenosine deaminase | location=Pf3D7_10_v3:1206302-1207405(+) | protein_length=367 | sequence_SO=chromosome | SO=protein_coding | is_pseudo=false	NaN	1	-76.4327	0.235673	2673-1uM	DMSO
2673-1uM / DMSO	_VLDFVTPTPLGTR_	90;190;109;40;190	Specific-N	A0A087WSW9;A0A087WSY9;A0A182DWI3;F8W809;Q16881	-0.790964	0.790964	1.42981e-14	3.91947e-13	36	A0A087WSW9;A0A087WSY9;A0A182DWI3;F8W809;Q16881	TXNRD1	Thioredoxin reductase 1, cytoplasmic;Thioredoxin reductase 1, cytoplasmic;Thioredoxin reductase 1, cytoplasmic;Thioredoxin reductase 1, cytoplasmic;Thioredoxin reductase 1, cytoplasmic	A0A087WSW9_HUMAN;A0A087WSY9_HUMAN;A0A182DWI3_HUMAN;F8W809_HUMAN;TRXR1_HUMAN	1	-42.2042	0.577958	2673-1uM	DMSO
2673-1uM / DMSO	_SIDPYIVELK_	258	Specific-N	transcript=PF3D7_1408100.1	-0.580695	0.580695	1.44693e-14	3.96166e-13	36	transcript=PF3D7_1408100.1	NaN	gene=PF3D7_1408100 | organism=Plasmodium_falciparum_3D7 | gene_product=plasmepsin III | transcript_product=plasmepsin III | location=Pf3D7_14_v3:297468-298823(+) | protein_length=451 | sequence_SO=chromosome | SO=protein_coding | is_pseudo=false	NaN	1	-33.1359	0.668641	2673-1uM	DMSO
2673-10uM / DMSO	_TKYPVSSVNVIK_	186	Specific	transcript=PF3D7_1132200.1	0.318456	0.318456	1.44965e-14	3.96434e-13	99	transcript=PF3D7_1132200.1	NaN	gene=PF3D7_1132200 | organism=Plasmodium_falciparum_3D7 | gene_product=T-complex protein 1 subunit alpha | transcript_product=T-complex protein 1 subunit alpha | location=Pf3D7_11_v3:1248310-1250232(-) | protein_length=544 | sequence_SO=chromosome | SO=protein_coding | is_pseudo=false	NaN	1	24.6996	1.247	2673-10uM	DMSO
2673-10uM / DMSO	_VLDINLFR_	2	Specific-N	transcript=PF3D7_0717700.1	-0.811484	0.811484	1.45961e-14	3.9868e-13	54	transcript=PF3D7_0717700.1	NaN	gene=PF3D7_0717700 | organism=Plasmodium_falciparum_3D7 | gene_product=serine--tRNA ligase, putative | transcript_product=serine--tRNA ligase, putative | location=Pf3D7_07_v3:764794-766413(-) | protein_length=539 | sequence_SO=chromosome | SO=protein_coding | is_pseudo=false	NaN	1	-43.0205	0.569795	2673-10uM	DMSO
2673-10uM / DMSO	_AIYLALQDK_	54	Specific	transcript=PF3D7_1213700.1	0.456636	0.456636	1.48451e-14	4.04998e-13	54	transcript=PF3D7_1213700.1	NaN	gene=PF3D7_1213700 | organism=Plasmodium_falciparum_3D7 | gene_product=DNA-directed RNA polymerases I, II, and III subunit RPABC3, putative | transcript_product=DNA-directed RNA polymerases I, II, and III subunit RPABC3, putative | location=Pf3D7_12_v3:588128-588982(-) | protein_length=145 | sequence_SO=chromosome | SO=protein_coding | is_pseudo=false	NaN	1	37.2339	1.37234	2673-10uM	DMSO
2673-10uM / DMSO	_VVEVPNVK_	471	Specific-N	transcript=PF3D7_0619400.1	0.642081	0.642081	1.48807e-14	4.05486e-13	63	transcript=PF3D7_0619400.1	NaN	gene=PF3D7_0619400 | organism=Plasmodium_falciparum_3D7 | gene_product=cell division cycle protein 48 homologue, putative | transcript_product=cell division cycle protein 48 homologue, putative | location=Pf3D7_06_v3:815622-818247(-) | protein_length=828 | sequence_SO=chromosome | SO=protein_coding | is_pseudo=false	NaN	1	56.0579	1.56058	2673-10uM	DMSO
2673-10uM / DMSO	_KLPQSVKPGNIIL_	147	Specific-C	transcript=PF3D7_0626800.1	-0.335493	0.335493	1.50392e-14	4.08829e-13	108	transcript=PF3D7_0626800.1	NaN	gene=PF3D7_0626800 | organism=Plasmodium_falciparum_3D7 | gene_product=pyruvate kinase | transcript_product=pyruvate kinase | location=Pf3D7_06_v3:1078995-1081320(+) | protein_length=511 | sequence_SO=chromosome | SO=protein_coding | is_pseudo=false	NaN	1	-20.7487	0.792513	2673-10uM	DMSO
2673-10uM / DMSO	_LRIEESLGNNA_	424	Unspecific	transcript=PF3D7_1015900.1	-0.525524	0.525524	1.50239e-14	4.08829e-13	54	transcript=PF3D7_1015900.1	NaN	gene=PF3D7_1015900 | organism=Plasmodium_falciparum_3D7 | gene_product=enolase | transcript_product=enolase | location=Pf3D7_10_v3:637138-639011(+) | protein_length=446 | sequence_SO=chromosome | SO=protein_coding | is_pseudo=false	NaN	1	-30.5293	0.694707	2673-10uM	DMSO
2673-10uM / DMSO	_IVEVIEGLSSSESHIR_	4	Specific	transcript=PF3D7_0524000.1	0.527325	0.527325	1.5124e-14	4.10647e-13	108	transcript=PF3D7_0524000.1	NaN	gene=PF3D7_0524000 | organism=Plasmodium_falciparum_3D7 | gene_product=karyopherin beta | transcript_product=karyopherin beta | location=Pf3D7_05_v3:998753-1002124(+) | protein_length=1123 | sequence_SO=chromosome | SO=protein_coding | is_pseudo=false	NaN	1	44.1255	1.44125	2673-10uM	DMSO
2673-1uM / DMSO	_LSSIVPTIL_	645	Unspecific	transcript=PF3D7_0524000.1	-0.570052	0.570052	1.52796e-14	4.1438e-13	99	transcript=PF3D7_0524000.1	NaN	gene=PF3D7_0524000 | organism=Plasmodium_falciparum_3D7 | gene_product=karyopherin beta | transcript_product=karyopherin beta | location=Pf3D7_05_v3:998753-1002124(+) | protein_length=1123 | sequence_SO=chromosome | SO=protein_coding | is_pseudo=false	NaN	1	-32.6408	0.673592	2673-1uM	DMSO
2673-1uM / DMSO	_NLQNLVNF_	211	Unspecific	transcript=PF3D7_0317000.1	-1.04567	1.04567	1.53483e-14	4.15749e-13	27	transcript=PF3D7_0317000.1	NaN	gene=PF3D7_0317000 | organism=Plasmodium_falciparum_3D7 | gene_product=proteasome subunit alpha type-3, putative | transcript_product=proteasome subunit alpha type-3, putative | location=Pf3D7_03_v3:682795-683685(-) | protein_length=252 | sequence_SO=chromosome | SO=protein_coding | is_pseudo=false	NaN	1	-51.5581	0.484419	2673-1uM	DMSO
2673-10uM / DMSO	_EMTNEQGVIPLR_	41	Specific-N	transcript=PF3D7_1124600.1	-1.08146	1.08146	1.55711e-14	4.21272e-13	36	transcript=PF3D7_1124600.1	NaN	gene=PF3D7_1124600 | organism=Plasmodium_falciparum_3D7 | gene_product=ethanolamine kinase | transcript_product=ethanolamine kinase | location=Pf3D7_11_v3:970105-971376(-) | protein_length=423 | sequence_SO=chromosome | SO=protein_coding | is_pseudo=false	NaN	1	-52.7451	0.472549	2673-10uM	DMSO
2673-1uM / DMSO	_GGIGNIQHTLISDITK_	93	Specific	transcript=PF3D7_1438900.1	0.446762	0.446762	1.5589e-14	4.21272e-13	90	transcript=PF3D7_1438900.1	NaN	gene=PF3D7_1438900 | organism=Plasmodium_falciparum_3D7 | gene_product=thioredoxin peroxidase 1 | transcript_product=thioredoxin peroxidase 1 | location=Pf3D7_14_v3:1575984-1576571(+) | protein_length=195 | sequence_SO=chromosome | SO=protein_coding | is_pseudo=false	NaN	1	36.2978	1.36298	2673-1uM	DMSO
2673-1uM / DMSO	_AINDPFMDLNHLC[Carbamidomethyl (C)]Y_	32	Unspecific	transcript=PF3D7_1462800.1	0.481827	0.481827	1.59984e-14	4.31825e-13	54	transcript=PF3D7_1462800.1	NaN	gene=PF3D7_1462800 | organism=Plasmodium_falciparum_3D7 | gene_product=glyceraldehyde-3-phosphate dehydrogenase | transcript_product=glyceraldehyde-3-phosphate dehydrogenase | location=Pf3D7_14_v3:2559098-2560347(+) | protein_length=337 | sequence_SO=chromosome | SO=protein_coding | is_pseudo=false	NaN	1	39.6511	1.39651	2673-1uM	DMSO
2673-10uM / DMSO	_LQNPVEIF_	274	Unspecific	transcript=PF3D7_0209800.1	1.06623	1.06623	1.62381e-14	4.37777e-13	81	transcript=PF3D7_0209800.1	NaN	gene=PF3D7_0209800 | organism=Plasmodium_falciparum_3D7 | gene_product=ATP-dependent RNA helicase UAP56 | transcript_product=ATP-dependent RNA helicase UAP56 | location=Pf3D7_02_v3:404281-406355(-) | protein_length=457 | sequence_SO=chromosome | SO=protein_coding | is_pseudo=false	NaN	1	109.395	2.09395	2673-10uM	DMSO
2673-10uM / DMSO	_LLSNQVINNYFLNK_	198	Specific	transcript=PF3D7_0919700.1	0.384045	0.384045	1.62633e-14	4.37941e-13	54	transcript=PF3D7_0919700.1	NaN	gene=PF3D7_0919700 | organism=Plasmodium_falciparum_3D7 | gene_product=pyridoxal phosphate homeostasis protein, putative | transcript_product=pyridoxal phosphate homeostasis protein, putative | location=Pf3D7_09_v3:803029-803757(+) | protein_length=242 | sequence_SO=chromosome | SO=protein_coding | is_pseudo=false	NaN	1	30.4996	1.305	2673-10uM	DMSO
2673-1uM / DMSO	_IC[Carbamidomethyl (C)]DQISDAILDSC[Carbamidomethyl (C)]_	26	Specific-C	transcript=PF3D7_0922200.1	-0.324034	0.324034	1.68157e-14	4.52283e-13	54	transcript=PF3D7_0922200.1	NaN	gene=PF3D7_0922200 | organism=Plasmodium_falciparum_3D7 | gene_product=S-adenosylmethionine synthetase | transcript_product=S-adenosylmethionine synthetase | location=Pf3D7_09_v3:903362-904570(+) | protein_length=402 | sequence_SO=chromosome | SO=protein_coding | is_pseudo=false	NaN	1	-20.1167	0.798833	2673-1uM	DMSO
2673-10uM / DMSO	_LQPAEIETC[Carbamidomethyl (C)]M[Oxidation (M)]K_	575	Specific	transcript=PF3D7_0818900.1	0.676157	0.676157	1.73695e-14	4.66629e-13	54	transcript=PF3D7_0818900.1	NaN	gene=PF3D7_0818900 | organism=Plasmodium_falciparum_3D7 | gene_product=heat shock protein 70 | transcript_product=heat shock protein 70 | location=Pf3D7_08_v3:860384-862417(+) | protein_length=677 | sequence_SO=chromosome | SO=protein_coding | is_pseudo=false	NaN	1	59.7878	1.59788	2673-10uM	DMSO
2673-10uM / DMSO	_LDLLEPLGR_	1461	Specific-N	P11277	1.215	1.215	1.74761e-14	4.68942e-13	45	P11277	SPTB	Spectrin beta chain, erythrocytic	SPTB1_HUMAN	1	132.141	2.32141	2673-10uM	DMSO
2673-10uM / DMSO	_NVLLQNSPVVK_	460	Specific	transcript=PF3D7_1454400.1	0.970474	0.970474	1.76856e-14	4.74007e-13	27	transcript=PF3D7_1454400.1	NaN	gene=PF3D7_1454400 | organism=Plasmodium_falciparum_3D7 | gene_product=aminopeptidase P | transcript_product=aminopeptidase P | location=Pf3D7_14_v3:2234143-2236476(+) | protein_length=777 | sequence_SO=chromosome | SO=protein_coding | is_pseudo=false	NaN	1	95.9484	1.95948	2673-10uM	DMSO
2673-10uM / DMSO	_INVENAFFTLAR_	156	Specific-N	P61006	-1.02565	1.02565	1.78549e-14	4.77986e-13	36	P61006	RAB8A	Ras-related protein Rab-8A	RAB8A_HUMAN	1	-50.8811	0.491189	2673-10uM	DMSO
2673-10uM / DMSO	_ITSPLMEPSSIEK_	54	Specific	P28066	1.23862	1.23862	1.79651e-14	4.80371e-13	27	P28066	PSMA5	Proteasome subunit alpha type-5	PSA5_HUMAN	1	135.973	2.35973	2673-10uM	DMSO
2673-10uM / DMSO	_AHLPAEFTPA_	112	Unspecific	P69905	-0.433713	0.433713	1.80161e-14	4.80611e-13	54	P69905	HBA1	Hemoglobin subunit alpha	HBA_HUMAN	1	-25.9646	0.740354	2673-10uM	DMSO
2673-10uM / DMSO	_NLVLQTIK_	195	Specific	transcript=PF3D7_1357900.1	0.520825	0.520825	1.79998e-14	4.80611e-13	108	transcript=PF3D7_1357900.1	NaN	gene=PF3D7_1357900 | organism=Plasmodium_falciparum_3D7 | gene_product=pyrroline-5-carboxylate reductase, putative | transcript_product=pyrroline-5-carboxylate reductase, putative | location=Pf3D7_13_v3:2295637-2297156(+) | protein_length=262 | sequence_SO=chromosome | SO=protein_coding | is_pseudo=false	NaN	1	43.4775	1.43478	2673-10uM	DMSO
2673-10uM / DMSO	_ESHDPLTVL_	959	Unspecific	transcript=PF3D7_0930300.1	0.758913	0.758913	1.85671e-14	4.94733e-13	36	transcript=PF3D7_0930300.1	NaN	gene=PF3D7_0930300 | organism=Plasmodium_falciparum_3D7 | gene_product=merozoite surface protein 1 | transcript_product=merozoite surface protein 1 | location=Pf3D7_09_v3:1201812-1206974(+) | protein_length=1720 | sequence_SO=chromosome | SO=protein_coding | is_pseudo=false	NaN	1	69.2215	1.69221	2673-10uM	DMSO
2673-10uM / DMSO	_LIAEVITK_	1020	Specific	transcript=PF3D7_1311800.1	0.523354	0.523354	1.9519e-14	5.19491e-13	99	transcript=PF3D7_1311800.1	NaN	gene=PF3D7_1311800 | organism=Plasmodium_falciparum_3D7 | gene_product=M1-family alanyl aminopeptidase | transcript_product=M1-family alanyl aminopeptidase | location=Pf3D7_13_v3:501790-505047(+) | protein_length=1085 | sequence_SO=chromosome | SO=protein_coding | is_pseudo=false	NaN	1	43.7293	1.43729	2673-10uM	DMSO
2673-10uM / DMSO	_LVPLVQATFPENAVTK_	1087	Specific	P16157	0.697989	0.697989	1.97263e-14	5.24144e-13	90	P16157	ANK1	Ankyrin-1	ANK1_HUMAN	1	62.2242	1.62224	2673-10uM	DMSO
2673-10uM / DMSO	_GDVENTILDIL_	299	Specific-C	P36959	-0.876819	0.876819	1.97396e-14	5.24144e-13	36	P36959	GMPR	GMP reductase 1	GMPR1_HUMAN	1	-45.5433	0.544567	2673-10uM	DMSO
2673-1uM / DMSO	_IVGGGDTASLVEQQNK_	369	Specific-N	transcript=PF3D7_0922500.1	0.495322	0.495322	2.03069e-14	5.38581e-13	54	transcript=PF3D7_0922500.1	NaN	gene=PF3D7_0922500 | organism=Plasmodium_falciparum_3D7 | gene_product=phosphoglycerate kinase | transcript_product=phosphoglycerate kinase | location=Pf3D7_09_v3:913230-914480(+) | protein_length=416 | sequence_SO=chromosome | SO=protein_coding | is_pseudo=false	NaN	1	40.9636	1.40964	2673-1uM	DMSO
2673-10uM / DMSO	_DPILFPSFIHSQK_	157	Specific	P04040	0.474609	0.474609	2.05442e-14	5.44243e-13	108	P04040	CAT	Catalase	CATA_HUMAN	1	38.9541	1.38954	2673-10uM	DMSO
2673-1uM / DMSO	_NDNC[Carbamidomethyl (C)]YLDLITSFR_	153	Specific	transcript=PF3D7_1128400.1	0.557367	0.557367	2.06312e-14	5.45915e-13	45	transcript=PF3D7_1128400.1	NaN	gene=PF3D7_1128400 | organism=Plasmodium_falciparum_3D7 | gene_product=bifunctional farnesyl/geranylgeranyl diphosphate synthase | transcript_product=bifunctional farnesyl/geranylgeranyl diphosphate synthase | location=Pf3D7_11_v3:1104216-1106505(-) | protein_length=376 | sequence_SO=chromosome | SO=protein_coding | is_pseudo=false	NaN	1	47.1581	1.47158	2673-1uM	DMSO
2673-10uM / DMSO	_IIDMLSEYSDITC[Carbamidomethyl (C)]R_	32	Specific	transcript=PF3D7_1354500.1	0.472334	0.472334	2.09301e-14	5.53183e-13	54	transcript=PF3D7_1354500.1	NaN	gene=PF3D7_1354500 | organism=Plasmodium_falciparum_3D7 | gene_product=adenylosuccinate synthetase | transcript_product=adenylosuccinate synthetase | location=Pf3D7_13_v3:2174346-2175797(+) | protein_length=442 | sequence_SO=chromosome | SO=protein_coding | is_pseudo=false	NaN	1	38.7352	1.38735	2673-10uM	DMSO
2673-10uM / DMSO	_VPNFYEEK_	148	Specific	transcript=PF3D7_0214000.1	0.351216	0.351216	2.10148e-14	5.54406e-13	54	transcript=PF3D7_0214000.1	NaN	gene=PF3D7_0214000 | organism=Plasmodium_falciparum_3D7 | gene_product=T-complex protein 1 subunit theta | transcript_product=T-complex protein 1 subunit theta | location=Pf3D7_02_v3:566121-567894(+) | protein_length=542 | sequence_SO=chromosome | SO=protein_coding | is_pseudo=false	NaN	1	27.5635	1.27564	2673-10uM	DMSO
2673-10uM / DMSO	_EVIIEEVKEEVK_	1124	Specific	transcript=PF3D7_0500800.1	-2.29293	2.29293	2.10249e-14	5.54406e-13	54	transcript=PF3D7_0500800.1	NaN	gene=PF3D7_0500800 | organism=Plasmodium_falciparum_3D7 | gene_product=mature parasite-infected erythrocyte surface antigen | transcript_product=mature parasite-infected erythrocyte surface antigen | location=Pf3D7_05_v3:43327-47761(-) | protein_length=1434 | sequence_SO=chromosome | SO=protein_coding | is_pseudo=false	NaN	1	-79.594	0.20406	2673-10uM	DMSO
2673-1uM / DMSO	_EHGITVEELNEK_	125	Specific	transcript=PF3D7_0728000.1	0.244012	0.244012	2.20513e-14	5.80803e-13	99	transcript=PF3D7_0728000.1	NaN	gene=PF3D7_0728000 | organism=Plasmodium_falciparum_3D7 | gene_product=eukaryotic translation initiation factor 2 subunit alpha | transcript_product=eukaryotic translation initiation factor 2 subunit alpha | location=Pf3D7_07_v3:1191179-1192289(-) | protein_length=329 | sequence_SO=chromosome | SO=protein_coding | is_pseudo=false	NaN	1	18.4282	1.18428	2673-1uM	DMSO
2673-10uM / DMSO	_EYQIIDYFFQPNEC[Carbamidomethyl (C)]SHPLK_	71	Specific	transcript=PF3D7_1447000.1	0.325739	0.325739	2.23838e-14	5.88883e-13	54	transcript=PF3D7_1447000.1	NaN	gene=PF3D7_1447000 | organism=Plasmodium_falciparum_3D7 | gene_product=40S ribosomal protein S5 | transcript_product=40S ribosomal protein S5 | location=Pf3D7_14_v3:1929931-1931379(+) | protein_length=272 | sequence_SO=chromosome | SO=protein_coding | is_pseudo=false	NaN	1	25.3306	1.25331	2673-10uM	DMSO
2673-1uM / DMSO	_NYPDPLYILNK_	790	Specific	transcript=PF3D7_1332900.1	0.361246	0.361246	2.31647e-14	6.08725e-13	45	transcript=PF3D7_1332900.1	NaN	gene=PF3D7_1332900 | organism=Plasmodium_falciparum_3D7 | gene_product=isoleucine--tRNA ligase, putative | transcript_product=isoleucine--tRNA ligase, putative | location=Pf3D7_13_v3:1350042-1353860(-) | protein_length=1272 | sequence_SO=chromosome | SO=protein_coding | is_pseudo=false	NaN	1	28.4535	1.28453	2673-1uM	DMSO
2673-10uM / DMSO	_LDQLIYIPLPDLGAR_	642	Specific	transcript=PF3D7_0619400.1	-0.938391	0.938391	2.32255e-14	6.09623e-13	81	transcript=PF3D7_0619400.1	NaN	gene=PF3D7_0619400 | organism=Plasmodium_falciparum_3D7 | gene_product=cell division cycle protein 48 homologue, putative | transcript_product=cell division cycle protein 48 homologue, putative | location=Pf3D7_06_v3:815622-818247(-) | protein_length=828 | sequence_SO=chromosome | SO=protein_coding | is_pseudo=false	NaN	1	-47.8186	0.521814	2673-10uM	DMSO
2673-10uM / DMSO	_RLDFVPEKS_	81	Specific-C	transcript=PF3D7_1242700.1	0.519234	0.519234	2.35088e-14	6.1635e-13	45	transcript=PF3D7_1242700.1	NaN	gene=PF3D7_1242700 | organism=Plasmodium_falciparum_3D7 | gene_product=40S ribosomal protein S17, putative | transcript_product=40S ribosomal protein S17, putative | location=Pf3D7_12_v3:1803653-1804483(+) | protein_length=137 | sequence_SO=chromosome | SO=protein_coding | is_pseudo=false	NaN	1	43.3194	1.43319	2673-10uM	DMSO
2673-10uM / DMSO	_DEPPEQAEPEPTEAWK_	600	Specific-N	P11171	0.471711	0.471711	2.36858e-14	6.20279e-13	45	P11171	EPB41	Protein 4.1	41_HUMAN	1	38.6753	1.38675	2673-10uM	DMSO
2673-10uM / DMSO	_NNPLDFLK_	119	Specific	transcript=PF3D7_0815600.1	-0.214013	0.214013	2.3926e-14	6.25855e-13	99	transcript=PF3D7_0815600.1	NaN	gene=PF3D7_0815600 | organism=Plasmodium_falciparum_3D7 | gene_product=eukaryotic translation initiation factor 3 subunit G, putative | transcript_product=eukaryotic translation initiation factor 3 subunit G, putative | location=Pf3D7_08_v3:729917-732187(-) | protein_length=268 | sequence_SO=chromosome | SO=protein_coding | is_pseudo=false	NaN	1	-13.7864	0.862136	2673-10uM	DMSO
2673-10uM / DMSO	_TDYWPC[Carbamidomethyl (C)]PPSLA_	189	Unspecific	Q08495	0.941547	0.941547	2.40208e-14	6.27614e-13	27	Q08495	DMTN	Dematin	DEMA_HUMAN	1	92.0587	1.92059	2673-10uM	DMSO
2673-10uM / DMSO	_LGPEAPHIDYTQLGR_	269	Specific-N	P02730	-0.357638	0.357638	2.41973e-14	6.31504e-13	108	P02730	SLC4A1	Band 3 anion transport protein	B3AT_HUMAN	1	-21.9559	0.780441	2673-10uM	DMSO
2673-10uM / DMSO	_ENTVLDESIQK_	6	Specific-N	transcript=PF3D7_1027300.1	0.337833	0.337833	2.48977e-14	6.47567e-13	54	transcript=PF3D7_1027300.1	NaN	gene=PF3D7_1027300 | organism=Plasmodium_falciparum_3D7 | gene_product=peroxiredoxin | transcript_product=peroxiredoxin | location=Pf3D7_10_v3:1140589-1142602(-) | protein_length=393 | sequence_SO=chromosome | SO=protein_coding | is_pseudo=false	NaN	1	26.3857	1.26386	2673-10uM	DMSO
2673-10uM / DMSO	_NTIPSDVDC[Carbamidomethyl (C)]VSPSGIR_	356	Specific	transcript=PF3D7_1235600.1	0.403767	0.403767	2.48799e-14	6.47567e-13	81	transcript=PF3D7_1235600.1	NaN	gene=PF3D7_1235600 | organism=Plasmodium_falciparum_3D7 | gene_product=serine hydroxymethyltransferase | transcript_product=serine hydroxymethyltransferase | location=Pf3D7_12_v3:1484306-1485911(+) | protein_length=442 | sequence_SO=chromosome | SO=protein_coding | is_pseudo=false	NaN	1	32.2958	1.32296	2673-10uM	DMSO
2673-10uM / DMSO	_SEYNPLLTFLK_	423	Specific	transcript=PF3D7_1441400.1	0.38191	0.38191	2.48449e-14	6.47567e-13	45	transcript=PF3D7_1441400.1	NaN	gene=PF3D7_1441400 | organism=Plasmodium_falciparum_3D7 | gene_product=FACT complex subunit SSRP1, putative | transcript_product=FACT complex subunit SSRP1, putative | location=Pf3D7_14_v3:1690993-1692513(+) | protein_length=506 | sequence_SO=chromosome | SO=protein_coding | is_pseudo=false	NaN	1	30.3066	1.30307	2673-10uM	DMSO
2673-10uM / DMSO	_HSLIDDVEAVAYPSFER_	116	Specific	transcript=PF3D7_0627500.1	0.348753	0.348753	2.533e-14	6.58061e-13	108	transcript=PF3D7_0627500.1	NaN	gene=PF3D7_0627500 | organism=Plasmodium_falciparum_3D7 | gene_product=protein DJ-1 | transcript_product=protein DJ-1 | location=Pf3D7_06_v3:1101734-1102852(-) | protein_length=189 | sequence_SO=chromosome | SO=protein_coding | is_pseudo=false	NaN	1	27.3459	1.27346	2673-10uM	DMSO
2673-10uM / DMSO	_GGSILHGVL_	274	Unspecific	transcript=PF3D7_1410600.1	-1.0909	1.0909	2.5616e-14	6.64738e-13	36	transcript=PF3D7_1410600.1	NaN	gene=PF3D7_1410600 | organism=Plasmodium_falciparum_3D7 | gene_product=eukaryotic translation initiation factor 2 subunit gamma, putative | transcript_product=eukaryotic translation initiation factor 2 subunit gamma, putative | location=Pf3D7_14_v3:427191-428588(+) | protein_length=465 | sequence_SO=chromosome | SO=protein_coding | is_pseudo=false	NaN	1	-53.0531	0.469469	2673-10uM	DMSO
2673-10uM / DMSO	_YVTTC[Carbamidomethyl (C)]DNDDLPTLEFHSR_	366	Specific-N	transcript=PF3D7_1407800.1	-0.529536	0.529536	2.58003e-14	6.6876e-13	45	transcript=PF3D7_1407800.1	NaN	gene=PF3D7_1407800 | organism=Plasmodium_falciparum_3D7 | gene_product=plasmepsin IV | transcript_product=plasmepsin IV | location=Pf3D7_14_v3:283086-284435(+) | protein_length=449 | sequence_SO=chromosome | SO=protein_coding | is_pseudo=false	NaN	1	-30.7223	0.692777	2673-10uM	DMSO
2673-1uM / DMSO	_IHMGDTNIPNTF_	487	Unspecific	transcript=PF3D7_0811400.1	-0.357796	0.357796	2.64833e-14	6.85687e-13	45	transcript=PF3D7_0811400.1	NaN	gene=PF3D7_0811400 | organism=Plasmodium_falciparum_3D7 | gene_product=conserved protein, unknown function | transcript_product=conserved protein, unknown function | location=Pf3D7_08_v3:575986-578370(+) | protein_length=608 | sequence_SO=chromosome | SO=protein_coding | is_pseudo=false	NaN	1	-21.9644	0.780356	2673-1uM	DMSO
2673-1uM / DMSO	_FSTVAGESGSADTVR_	113	Specific	P04040	1.35534	1.35534	2.65212e-14	6.85891e-13	27	P04040	CAT	Catalase	CATA_HUMAN	1	155.857	2.55857	2673-1uM	DMSO
2673-1uM / DMSO	_SINNNNTALC[Carbamidomethyl (C)]LEC[Carbamidomethyl (C)]K_	30	Specific	transcript=PF3D7_0317000.1	0.525116	0.525116	2.70296e-14	6.97462e-13	54	transcript=PF3D7_0317000.1	NaN	gene=PF3D7_0317000 | organism=Plasmodium_falciparum_3D7 | gene_product=proteasome subunit alpha type-3, putative | transcript_product=proteasome subunit alpha type-3, putative | location=Pf3D7_03_v3:682795-683685(-) | protein_length=252 | sequence_SO=chromosome | SO=protein_coding | is_pseudo=false	NaN	1	43.905	1.43905	2673-1uM	DMSO
2673-1uM / DMSO	_NHESVSPSVIY_	278	Specific-C	transcript=PF3D7_0511800.1	-0.502774	0.502774	2.7025e-14	6.97462e-13	54	transcript=PF3D7_0511800.1	NaN	gene=PF3D7_0511800 | organism=Plasmodium_falciparum_3D7 | gene_product=inositol-3-phosphate synthase | transcript_product=inositol-3-phosphate synthase | location=Pf3D7_05_v3:520720-522693(-) | protein_length=604 | sequence_SO=chromosome | SO=protein_coding | is_pseudo=false	NaN	1	-29.4252	0.705748	2673-1uM	DMSO
2673-10uM / DMSO	_LDAYDNHLNMILSNVR_	36	Specific	transcript=PF3D7_0819900.1	0.319654	0.319654	2.71088e-14	6.98716e-13	90	transcript=PF3D7_0819900.1	NaN	gene=PF3D7_0819900 | organism=Plasmodium_falciparum_3D7 | gene_product=U6 snRNA-associated Sm-like protein LSm3, putative | transcript_product=U6 snRNA-associated Sm-like protein LSm3, putative | location=Pf3D7_08_v3:899004-899657(-) | protein_length=91 | sequence_SO=chromosome | SO=protein_coding | is_pseudo=false	NaN	1	24.8031	1.24803	2673-10uM	DMSO
2673-10uM / DMSO	_LEEIFNLK_	36	Specific	transcript=PF3D7_1417700.1	-0.817292	0.817292	2.74471e-14	7.0664e-13	36	transcript=PF3D7_1417700.1	NaN	gene=PF3D7_1417700 | organism=Plasmodium_falciparum_3D7 | gene_product=conserved protein, unknown function | transcript_product=conserved protein, unknown function | location=Pf3D7_14_v3:750330-751684(+) | protein_length=231 | sequence_SO=chromosome | SO=protein_coding | is_pseudo=false	NaN	1	-43.2494	0.567506	2673-10uM	DMSO
2673-10uM / DMSO	_YQSSPAKPDSSFYK_	347	Specific	P02730	-0.330965	0.330965	2.75555e-14	7.08632e-13	90	P02730	SLC4A1	Band 3 anion transport protein	B3AT_HUMAN	1	-20.4995	0.795005	2673-10uM	DMSO
2673-1uM / DMSO	_LLTLMDGLK_	328	Specific-N	P55072	-0.431124	0.431124	2.80424e-14	7.20344e-13	54	P55072	VCP	Transitional endoplasmic reticulum ATPase	TERA_HUMAN	1	-25.8316	0.741684	2673-1uM	DMSO
2673-10uM / DMSO	_GTIIEDIEHGSII_	73	Unspecific	transcript=PF3D7_1243600.1	0.540253	0.540253	2.81639e-14	7.22652e-13	54	transcript=PF3D7_1243600.1	NaN	gene=PF3D7_1243600 | organism=Plasmodium_falciparum_3D7 | gene_product=translation initiation factor SUI1, putative | transcript_product=translation initiation factor SUI1, putative | location=Pf3D7_12_v3:1825959-1826884(+) | protein_length=115 | sequence_SO=chromosome | SO=protein_coding | is_pseudo=false	NaN	1	45.4228	1.45423	2673-10uM	DMSO
2673-10uM / DMSO	_INVLYEK_	158	Specific	transcript=PF3D7_0626700.1	0.576931	0.576931	2.86871e-14	7.35251e-13	45	transcript=PF3D7_0626700.1	NaN	gene=PF3D7_0626700 | organism=Plasmodium_falciparum_3D7 | gene_product=ATPase | transcript_product=ATPase | location=Pf3D7_06_v3:1075018-1076136(+) | protein_length=372 | sequence_SO=chromosome | SO=protein_coding | is_pseudo=false	NaN	1	49.1673	1.49167	2673-10uM	DMSO
2673-10uM / DMSO	_ISSGQEIELIC[Carbamidomethyl (C)]FLQK_	192	Specific	transcript=PF3D7_1143300.1	0.647969	0.647969	2.9346e-14	7.50457e-13	54	transcript=PF3D7_1143300.1	NaN	gene=PF3D7_1143300 | organism=Plasmodium_falciparum_3D7 | gene_product=DNA-directed RNA polymerases I and III subunit RPAC1, putative | transcript_product=DNA-directed RNA polymerases I and III subunit RPAC1, putative | location=Pf3D7_11_v3:1731899-1732900(-) | protein_length=333 | sequence_SO=chromosome | SO=protein_coding | is_pseudo=false	NaN	1	56.696	1.56696	2673-10uM	DMSO
2673-1uM / DMSO	_VSVVDLVC[Carbamidomethyl (C)]R_	243	Specific-N	transcript=PF3D7_1462800.1	-0.335647	0.335647	2.93231e-14	7.50457e-13	54	transcript=PF3D7_1462800.1	NaN	gene=PF3D7_1462800 | organism=Plasmodium_falciparum_3D7 | gene_product=glyceraldehyde-3-phosphate dehydrogenase | transcript_product=glyceraldehyde-3-phosphate dehydrogenase | location=Pf3D7_14_v3:2559098-2560347(+) | protein_length=337 | sequence_SO=chromosome | SO=protein_coding | is_pseudo=false	NaN	1	-20.7571	0.792429	2673-1uM	DMSO
2673-10uM / DMSO	_VGQAVDIVGQAGKPK_	900	Specific	transcript=PF3D7_0205900.1	-1.38564	1.38564	2.94541e-14	7.5238e-13	72	transcript=PF3D7_0205900.1	NaN	gene=PF3D7_0205900 | organism=Plasmodium_falciparum_3D7 | gene_product=26S proteasome regulatory subunit RPN1, putative | transcript_product=26S proteasome regulatory subunit RPN1, putative | location=Pf3D7_02_v3:235237-238816(+) | protein_length=966 | sequence_SO=chromosome | SO=protein_coding | is_pseudo=false	NaN	1	-61.7281	0.382719	2673-10uM	DMSO
2673-10uM / DMSO	_LLPTAISEIPK_	288	Specific	transcript=PF3D7_1342400.1	0.304191	0.304191	2.97666e-14	7.59514e-13	54	transcript=PF3D7_1342400.1	NaN	gene=PF3D7_1342400 | organism=Plasmodium_falciparum_3D7 | gene_product=casein kinase II beta chain | transcript_product=casein kinase II beta chain | location=Pf3D7_13_v3:1666832-1668153(-) | protein_length=385 | sequence_SO=chromosome | SO=protein_coding | is_pseudo=false	NaN	1	23.4726	1.23473	2673-10uM	DMSO
2673-1uM / DMSO	_EIDNYLTYIAERD_	248	Specific	transcript=PF3D7_0807500.1	1.0708	1.0708	3.00684e-14	7.66359e-13	81	transcript=PF3D7_0807500.1	NaN	gene=PF3D7_0807500 | organism=Plasmodium_falciparum_3D7 | gene_product=proteasome subunit alpha type-6, putative | transcript_product=proteasome subunit alpha type-6, putative | location=Pf3D7_08_v3:387219-388364(+) | protein_length=260 | sequence_SO=chromosome | SO=protein_coding | is_pseudo=false	NaN	1	110.06	2.1006	2673-1uM	DMSO
2673-10uM / DMSO	_KVPQVSTPTLVEVSR_	438;323;288;283;438	Specific	A0A0C4DGB6;B7WNR0;D6RHD5;H0YA55;P02768	0.270484	0.270484	3.14276e-14	8.00109e-13	99	A0A0C4DGB6;B7WNR0;D6RHD5;H0YA55;P02768	ALB	Serum albumin;Serum albumin;Serum albumin;Serum albumin (Fragment);Serum albumin	A0A0C4DGB6_HUMAN;B7WNR0_HUMAN;D6RHD5_HUMAN;H0YA55_HUMAN;ALBU_HUMAN	1	20.6212	1.20621	2673-10uM	DMSO
2673-10uM / DMSO	_HWNVDLIPK_	70	Specific	transcript=PF3D7_1242800.1	0.2138	0.2138	3.22134e-14	8.19201e-13	54	transcript=PF3D7_1242800.1	NaN	gene=PF3D7_1242800 | organism=Plasmodium_falciparum_3D7 | gene_product=rab specific GDP dissociation inhibitor | transcript_product=rab specific GDP dissociation inhibitor | location=Pf3D7_12_v3:1805380-1807356(-) | protein_length=459 | sequence_SO=chromosome | SO=protein_coding | is_pseudo=false	NaN	1	15.9739	1.15974	2673-10uM	DMSO
2673-10uM / DMSO	_GELPHLLLHGPPGTGK_	44	Specific	transcript=PF3D7_1463200.1	-1.3846	1.3846	3.30421e-14	8.39343e-13	90	transcript=PF3D7_1463200.1	NaN	gene=PF3D7_1463200 | organism=Plasmodium_falciparum_3D7 | gene_product=replication factor C subunit 3, putative | transcript_product=replication factor C subunit 3, putative | location=Pf3D7_14_v3:2570434-2571719(+) | protein_length=344 | sequence_SO=chromosome | SO=protein_coding | is_pseudo=false	NaN	1	-61.7004	0.382996	2673-10uM	DMSO
2673-10uM / DMSO	_HVSFVDC[Carbamidomethyl (C)]PGHDILMA_	123	Specific-C	transcript=PF3D7_1410600.1	0.400941	0.400941	3.31252e-14	8.4052e-13	45	transcript=PF3D7_1410600.1	NaN	gene=PF3D7_1410600 | organism=Plasmodium_falciparum_3D7 | gene_product=eukaryotic translation initiation factor 2 subunit gamma, putative | transcript_product=eukaryotic translation initiation factor 2 subunit gamma, putative | location=Pf3D7_14_v3:427191-428588(+) | protein_length=465 | sequence_SO=chromosome | SO=protein_coding | is_pseudo=false	NaN	1	32.0369	1.32037	2673-10uM	DMSO
2673-10uM / DMSO	_GSNTISEC[Carbamidomethyl (C)]SEFIDMLK_	78	Specific	transcript=PF3D7_0627500.1	0.384199	0.384199	3.31822e-14	8.41032e-13	54	transcript=PF3D7_0627500.1	NaN	gene=PF3D7_0627500 | organism=Plasmodium_falciparum_3D7 | gene_product=protein DJ-1 | transcript_product=protein DJ-1 | location=Pf3D7_06_v3:1101734-1102852(-) | protein_length=189 | sequence_SO=chromosome | SO=protein_coding | is_pseudo=false	NaN	1	30.5135	1.30514	2673-10uM	DMSO
2673-10uM / DMSO	_ALENPQRPLLAILGGAK_	199	Specific	transcript=PF3D7_0922500.1	0.301618	0.301618	3.37195e-14	8.53705e-13	108	transcript=PF3D7_0922500.1	NaN	gene=PF3D7_0922500 | organism=Plasmodium_falciparum_3D7 | gene_product=phosphoglycerate kinase | transcript_product=phosphoglycerate kinase | location=Pf3D7_09_v3:913230-914480(+) | protein_length=416 | sequence_SO=chromosome | SO=protein_coding | is_pseudo=false	NaN	1	23.2526	1.23253	2673-10uM	DMSO
2673-10uM / DMSO	_NNFGPFVPNFLK_	165	Specific	transcript=PF3D7_0608800.1	0.382804	0.382804	3.38899e-14	8.57068e-13	54	transcript=PF3D7_0608800.1	NaN	gene=PF3D7_0608800 | organism=Plasmodium_falciparum_3D7 | gene_product=ornithine aminotransferase | transcript_product=ornithine aminotransferase | location=Pf3D7_06_v3:362635-363879(+) | protein_length=414 | sequence_SO=chromosome | SO=protein_coding | is_pseudo=false	NaN	1	30.3874	1.30387	2673-10uM	DMSO
2673-1uM / DMSO	_VTILELFR_	257	Specific	P11166	0.218036	0.218036	3.41875e-14	8.63642e-13	54	P11166	SLC2A1	Solute carrier family 2, facilitated glucose transporter member 1	GTR1_HUMAN	1	16.3149	1.16315	2673-1uM	DMSO
2673-10uM / DMSO	_TPEEIVNSRPF_	129	Unspecific	transcript=PF3D7_0814200.1	1.21559	1.21559	3.54386e-14	8.94257e-13	27	transcript=PF3D7_0814200.1	NaN	gene=PF3D7_0814200 | organism=Plasmodium_falciparum_3D7 | gene_product=DNA/RNA-binding protein Alba 1 | transcript_product=DNA/RNA-binding protein Alba 1 | location=Pf3D7_08_v3:687340-688086(+) | protein_length=248 | sequence_SO=chromosome | SO=protein_coding | is_pseudo=false	NaN	1	132.235	2.32235	2673-10uM	DMSO
2673-10uM / DMSO	_IPQLQIFK_	573	Specific	transcript=PF3D7_1222300.1	0.279783	0.279783	3.55292e-14	8.95556e-13	54	transcript=PF3D7_1222300.1	NaN	gene=PF3D7_1222300 | organism=Plasmodium_falciparum_3D7 | gene_product=endoplasmin, putative | transcript_product=endoplasmin, putative | location=Pf3D7_12_v3:883567-886032(-) | protein_length=821 | sequence_SO=chromosome | SO=protein_coding | is_pseudo=false	NaN	1	21.4012	1.21401	2673-10uM	DMSO
2673-10uM / DMSO	_FHLEQGEVIK_	67	Specific	transcript=PF3D7_1247400.1	0.303985	0.303985	3.59787e-14	9.05885e-13	108	transcript=PF3D7_1247400.1	NaN	gene=PF3D7_1247400 | organism=Plasmodium_falciparum_3D7 | gene_product=peptidyl-prolyl cis-trans isomerase FKBP35 | transcript_product=peptidyl-prolyl cis-trans isomerase FKBP35 | location=Pf3D7_12_v3:1955124-1956038(-) | protein_length=304 | sequence_SO=chromosome | SO=protein_coding | is_pseudo=false	NaN	1	23.455	1.23455	2673-10uM	DMSO
2673-1uM / DMSO	_IRVENPNSLLEQ_	1435	Specific-C	P16157	-0.245304	0.245304	3.64347e-14	9.16358e-13	54	P16157	ANK1	Ankyrin-1	ANK1_HUMAN	1	-15.6362	0.843638	2673-1uM	DMSO
2673-10uM / DMSO	_MISQNEIQEIIQK_	200	Specific-N	transcript=PF3D7_0618500.1	-0.265079	0.265079	3.68895e-14	9.26778e-13	54	transcript=PF3D7_0618500.1	NaN	gene=PF3D7_0618500 | organism=Plasmodium_falciparum_3D7 | gene_product=malate dehydrogenase | transcript_product=malate dehydrogenase | location=Pf3D7_06_v3:774529-775470(+) | protein_length=313 | sequence_SO=chromosome | SO=protein_coding | is_pseudo=false	NaN	1	-16.7847	0.832153	2673-10uM	DMSO
2673-10uM / DMSO	_SNYLGSVFLSSNIR_	117	Specific	transcript=PF3D7_0511800.1	0.884301	0.884301	3.774e-14	9.47105e-13	54	transcript=PF3D7_0511800.1	NaN	gene=PF3D7_0511800 | organism=Plasmodium_falciparum_3D7 | gene_product=inositol-3-phosphate synthase | transcript_product=inositol-3-phosphate synthase | location=Pf3D7_05_v3:520720-522693(-) | protein_length=604 | sequence_SO=chromosome | SO=protein_coding | is_pseudo=false	NaN	1	84.587	1.84587	2673-10uM	DMSO
2673-10uM / DMSO	_QNETTFLNEDLPK_	118	Specific	transcript=PF3D7_1419300.1	0.600495	0.600495	3.80767e-14	9.54506e-13	45	transcript=PF3D7_1419300.1	NaN	gene=PF3D7_1419300 | organism=Plasmodium_falciparum_3D7 | gene_product=glutathione S-transferase | transcript_product=glutathione S-transferase | location=Pf3D7_14_v3:802717-803481(+) | protein_length=211 | sequence_SO=chromosome | SO=protein_coding | is_pseudo=false	NaN	1	51.6237	1.51624	2673-10uM	DMSO
2673-10uM / DMSO	_FSPIVTVEPR_	1128	Specific-N	P16157	0.260499	0.260499	3.82799e-14	9.58549e-13	54	P16157	ANK1	Ankyrin-1	ANK1_HUMAN	1	19.7893	1.19789	2673-10uM	DMSO
2673-10uM / DMSO	_TLQHELEIVEGIK_	211	Specific	transcript=PF3D7_1015600.1	1.73692	1.73692	3.8468e-14	9.62205e-13	54	transcript=PF3D7_1015600.1	NaN	gene=PF3D7_1015600 | organism=Plasmodium_falciparum_3D7 | gene_product=heat shock protein 60 | transcript_product=heat shock protein 60 | location=Pf3D7_10_v3:627044-629040(-) | protein_length=580 | sequence_SO=chromosome | SO=protein_coding | is_pseudo=false	NaN	1	233.323	3.33323	2673-10uM	DMSO
2673-1uM / DMSO	_QTTSNIGYLTKPTLT_	178	Specific-C	transcript=PF3D7_1368100.1	-0.305513	0.305513	3.91703e-14	9.78701e-13	54	transcript=PF3D7_1368100.1	NaN	gene=PF3D7_1368100 | organism=Plasmodium_falciparum_3D7 | gene_product=26S proteasome regulatory subunit RPN11, putative | transcript_product=26S proteasome regulatory subunit RPN11, putative | location=Pf3D7_13_v3:2710406-2711718(-) | protein_length=311 | sequence_SO=chromosome | SO=protein_coding | is_pseudo=false	NaN	1	-19.0845	0.809155	2673-1uM	DMSO
2673-1uM / DMSO	_GNAGGIQPDLLISLTAPK_	228	Specific	Q8NCW5	0.78922	0.78922	3.94521e-14	9.84172e-13	27	Q8NCW5	NAXE	NAD(P)H-hydrate epimerase	NNRE_HUMAN	1	72.814	1.72814	2673-1uM	DMSO
2673-1uM / DMSO	_SVHAGEDVSIPNLNSL_	228	Unspecific	transcript=PF3D7_1029600.1	-1.11272	1.11272	3.94753e-14	9.84172e-13	45	transcript=PF3D7_1029600.1	NaN	gene=PF3D7_1029600 | organism=Plasmodium_falciparum_3D7 | gene_product=adenosine deaminase | transcript_product=adenosine deaminase | location=Pf3D7_10_v3:1206302-1207405(+) | protein_length=367 | sequence_SO=chromosome | SO=protein_coding | is_pseudo=false	NaN	1	-53.7579	0.462421	2673-1uM	DMSO
2673-10uM / DMSO	_ESGC[Carbamidomethyl (C)]SFVLALMQK_	414	Specific	P07384	0.692398	0.692398	3.96341e-14	9.87053e-13	27	P07384	CAPN1	Calpain-1 catalytic subunit	CAN1_HUMAN	1	61.5967	1.61597	2673-10uM	DMSO
2673-1uM / DMSO	_KVEDLIVLLGK_	145	Specific-N	transcript=PF3D7_0417200.1	-0.657977	0.657977	3.99826e-14	9.94648e-13	81	transcript=PF3D7_0417200.1	NaN	gene=PF3D7_0417200 | organism=Plasmodium_falciparum_3D7 | gene_product=bifunctional dihydrofolate reductase-thymidylate synthase | transcript_product=bifunctional dihydrofolate reductase-thymidylate synthase | location=Pf3D7_04_v3:748088-749914(+) | protein_length=608 | sequence_SO=chromosome | SO=protein_coding | is_pseudo=false	NaN	1	-36.6233	0.633767	2673-1uM	DMSO
2673-10uM / DMSO	_SVHDALC[Carbamidomethyl (C)]SVR_	396	Specific	transcript=PF3D7_0320300.1	0.270944	0.270944	4.00364e-14	9.94904e-13	90	transcript=PF3D7_0320300.1	NaN	gene=PF3D7_0320300 | organism=Plasmodium_falciparum_3D7 | gene_product=T-complex protein 1 subunit epsilon | transcript_product=T-complex protein 1 subunit epsilon | location=Pf3D7_03_v3:845713-847320(+) | protein_length=535 | sequence_SO=chromosome | SO=protein_coding | is_pseudo=false	NaN	1	20.6597	1.2066	2673-10uM	DMSO
2673-10uM / DMSO	_EAVELPLTC[Carbamidomethyl (C)]PELYEK_	152	Specific	transcript=PF3D7_0413600.1	-1.29945	1.29945	4.02677e-14	9.99566e-13	45	transcript=PF3D7_0413600.1	NaN	gene=PF3D7_0413600 | organism=Plasmodium_falciparum_3D7 | gene_product=26S protease regulatory subunit 6B, putative | transcript_product=26S protease regulatory subunit 6B, putative | location=Pf3D7_04_v3:616914-618350(-) | protein_length=392 | sequence_SO=chromosome | SO=protein_coding | is_pseudo=false	NaN	1	-59.3719	0.406281	2673-10uM	DMSO
2673-10uM / DMSO	_ALNGFTPLHIAC[Carbamidomethyl (C)]K_	368	Specific	P16157	0.525279	0.525279	4.1079e-14	1.0186e-12	72	P16157	ANK1	Ankyrin-1	ANK1_HUMAN	1	43.9212	1.43921	2673-10uM	DMSO
2673-10uM / DMSO	_IEYLFGENDIFVVPQR_	639	Specific	transcript=PF3D7_1364100.1	0.395265	0.395265	4.1218e-14	1.02094e-12	54	transcript=PF3D7_1364100.1	NaN	gene=PF3D7_1364100 | organism=Plasmodium_falciparum_3D7 | gene_product=6-cysteine protein | transcript_product=6-cysteine protein | location=Pf3D7_13_v3:2568556-2570946(+) | protein_length=796 | sequence_SO=chromosome | SO=protein_coding | is_pseudo=false	NaN	1	31.5184	1.31518	2673-10uM	DMSO
2673-10uM / DMSO	_YNPSENIMDHQ_	487	Specific-C	transcript=PF3D7_1420700.1	0.734622	0.734622	4.19272e-14	1.03738e-12	27	transcript=PF3D7_1420700.1	NaN	gene=PF3D7_1420700 | organism=Plasmodium_falciparum_3D7 | gene_product=surface protein P113 | transcript_product=surface protein P113 | location=Pf3D7_14_v3:860011-863080(+) | protein_length=969 | sequence_SO=chromosome | SO=protein_coding | is_pseudo=false	NaN	1	66.3961	1.66396	2673-10uM	DMSO
2673-10uM / DMSO	_YEENTVEEVFEEVTSK_	5426	Specific	transcript=PF3D7_1149000.1	-0.597074	0.597074	4.20854e-14	1.04017e-12	63	transcript=PF3D7_1149000.1	NaN	gene=PF3D7_1149000 | organism=Plasmodium_falciparum_3D7 | gene_product=antigen 332, DBL-like protein | transcript_product=antigen 332, DBL-like protein | location=Pf3D7_11_v3:1950210-1968726(+) | protein_length=6093 | sequence_SO=chromosome | SO=protein_coding | is_pseudo=false	NaN	1	-33.8907	0.661093	2673-10uM	DMSO
2673-1uM / DMSO	_SIDLLNNIIAT_	29	Unspecific	transcript=PF3D7_1326100.1	-0.319758	0.319758	4.25032e-14	1.04936e-12	45	transcript=PF3D7_1326100.1	NaN	gene=PF3D7_1326100 | organism=Plasmodium_falciparum_3D7 | gene_product=WD repeat-containing protein, putative | transcript_product=WD repeat-containing protein, putative | location=Pf3D7_13_v3:1087584-1089099(+) | protein_length=336 | sequence_SO=chromosome | SO=protein_coding | is_pseudo=false	NaN	1	-19.8795	0.801205	2673-1uM	DMSO
2673-10uM / DMSO	_VDASLESGFLNIK_	156	Specific-N	transcript=PF3D7_0918300.1	-0.363771	0.363771	4.27567e-14	1.05448e-12	54	transcript=PF3D7_0918300.1	NaN	gene=PF3D7_0918300 | organism=Plasmodium_falciparum_3D7 | gene_product=eukaryotic translation initiation factor 3 subunit F, putative | transcript_product=eukaryotic translation initiation factor 3 subunit F, putative | location=Pf3D7_09_v3:751358-752422(-) | protein_length=320 | sequence_SO=chromosome | SO=protein_coding | is_pseudo=false	NaN	1	-22.2869	0.777131	2673-10uM	DMSO
2673-1uM / DMSO	_APVHIIVIPK_	106	Specific-N	transcript=PF3D7_0817500.1	-0.484463	0.484463	4.33992e-14	1.06917e-12	54	transcript=PF3D7_0817500.1	NaN	gene=PF3D7_0817500 | organism=Plasmodium_falciparum_3D7 | gene_product=histidine triad nucleotide-binding protein 1 | transcript_product=histidine triad nucleotide-binding protein 1 | location=Pf3D7_08_v3:798777-800205(+) | protein_length=185 | sequence_SO=chromosome | SO=protein_coding | is_pseudo=false	NaN	1	-28.5237	0.714763	2673-1uM	DMSO
[truncated: 52,301 more rows]

## Sheet: Data S3 LiP-MS Exp 2
Data S3. Related to Fig. 4 and Fig. 5. Experiment 2 LiP-MS data
[truncated: 49,867 more rows]
