# Supplementary material for: Chemoproteomics validates selective targeting of Plasmodium M1 alanyl aminopeptidase as an antimalarial strategy
Source: eLife. 2024 Jul 8;13:RP92990. doi: 10.7554/eLife.92990 (PMC11230628; doi:10.7554/eLife.92990)
Supplement: Figure 4—source data 2. [file elife-92990-fig4-data2.xlsx]

## Sheet: Data S4 Fisher Exact Exp 1
Data S4. Related to Fig. 4. Experiment 1 LiP-MS Fisher Exact P-values
Gene ID	Total	LipMS significant	Fisher exact pvalue	Corrected pvalue
PF3D7_1029600	105	33	9.75e-21	2.1e-17
PF3D7_1311800	166	34	1.95e-16	4.2e-13
PF3D7_1454400	107	19	5.28e-09	1.14e-05
A0A087WSW9;A0A087WSY9;A0A182DWI3;F8W809;Q16881	11	7	4.1e-07	0.000883024
PF3D7_0932300	40	10	1.49e-06	0.00320832
PF3D7_1229400	22	8	1.64e-06	0.00352991
PF3D7_1446200	55	11	3.01e-06	0.00647685
PF3D7_0807500	24	7	2.43e-05	0.0523142
PF3D7_0108000	19	6	6.47e-05	0.139265
PF3D7_1127100	12	5	9.35e-05	0.201495
PF3D7_1113400	13	5	0.000126418	0.272305
PF3D7_1011400	22	6	0.000127625	0.274904
PF3D7_1408100	59	9	0.000150933	0.325109
PF3D7_0727400	36	7	0.000219347	0.472473
P02042	50	8	0.00026006	0.56017
PF3D7_1353900	20	5	0.000661811	1.42554
PF3D7_0532100	12	4	0.000960839	2.06965
PF3D7_0919700	12	4	0.000960839	2.06965
PF3D7_0406400	13	4	0.0012277	2.64446
PF3D7_0317000	25	5	0.00157384	3.39006
PF3D7_0519200	6	3	0.00177674	3.8271
PF3D7_1361900	39	6	0.00181093	3.90074
PF3D7_0518300	26	5	0.00183199	3.94611
PF3D7_1353800	15	4	0.00190899	4.11196
PF3D7_1474800	29	5	0.00279203	6.01402
PF3D7_0803800	17	4	0.00281471	6.06288
P04040	60	7	0.00323431	6.9667
PF3D7_0511800	81	8	0.00434257	9.3539
P27105	20	4	0.00466389	10.046
PF3D7_0728000	20	4	0.00466389	10.046
P49720	3	2	0.00786553	16.9423
PF3D7_0931800	25	4	0.00929622	20.0241
PF3D7_1459400	4	2	0.0115725	24.9271
PF3D7_1355500	27	4	0.0117661	25.3442
PF3D7_1209200	15	3	0.014208	30.604
PF3D7_1439900	45	5	0.0145349	31.3082
PF3D7_1108700	29	4	0.0146207	31.493
PF3D7_1115300	29	4	0.0146207	31.493
E7ETZ0;H0Y7A7;P0DP23;P0DP24;P0DP25	5	2	0.0158921	34.2316
P61225	5	2	0.0158921	34.2316
PF3D7_1015900	147	10	0.0165693	35.6902
PF3D7_1444800	67	6	0.0191218	41.1883
PF3D7_1247400	18	3	0.0217172	46.7788
PF3D7_1407900	34	4	0.0235481	50.7227
PF3D7_1366500	19	3	0.0246154	53.0215
P11166	35	4	0.0256534	55.2575
P07195	8	2	0.0321506	69.2523
PF3D7_1407500	8	2	0.0321506	69.2523
PF3D7_1407800	57	5	0.0335013	72.1618
P00390	22	3	0.0344914	74.2945
PF3D7_0512200	22	3	0.0344914	74.2945
P35754	9	2	0.0385526	83.0423
PF3D7_1121600	24	3	0.0420456	90.5662
PF3D7_1410600	42	4	0.0434887	93.6747
PF3D7_1012400	62	5	0.0445099	95.8743
P37837	10	2	0.0453911	97.7725
PF3D7_1215300	10	2	0.0453911	97.7725
PF3D7_0923800	25	3	0.0461071	99.3148
PF3D7_1457200	25	3	0.0461071	99.3148
P26447	11	2	0.0526357	113.377
PF3D7_1414400	27	3	0.0547846	118.006
C9J8U2;G5E977;Q6XQN6	1	1	0.0568803	122.52
P22303	1	1	0.0568803	122.52
PF3D7_0725100	1	1	0.0568803	122.52
PF3D7_1472600	1	1	0.0568803	122.52
PF3D7_1126900	13	2	0.0682272	146.961
P07384	73	5	0.0754931	162.612
P61970	14	2	0.0765198	164.824
PF3D7_1132200	32	3	0.0795423	171.334
P10599	2	1	0.084094	181.138
P28074	2	1	0.084094	181.138
PF3D7_0514600	2	1	0.084094	181.138
PF3D7_1215900	2	1	0.084094	181.138
PF3D7_1239600	2	1	0.084094	181.138
PF3D7_1371900	2	1	0.084094	181.138
Q99536	2	1	0.084094	181.138
E7EMK3;J3QLD9;Q14254	15	2	0.0851095	183.326
C9JIF9;P13798	34	3	0.0905832	195.116
PF3D7_0213100	16	2	0.0939722	202.416
PF3D7_0922100	16	2	0.0939722	202.416
PF3D7_1211900	36	3	0.102219	220.179
PF3D7_1357900	17	2	0.103085	222.045
O43865	3	1	0.110521	238.063
P06703;R4GN98	3	1	0.110521	238.063
PF3D7_0616800	3	1	0.110521	238.063
PF3D7_0619200	3	1	0.110521	238.063
PF3D7_1125900	3	1	0.110521	238.063
PF3D7_1418000	3	1	0.110521	238.063
PF3D7_1419100	3	1	0.110521	238.063
PF3D7_1443100	3	1	0.110521	238.063
PF3D7_1448300	3	1	0.110521	238.063
PF3D7_1457000	3	1	0.110521	238.063
Q08722	3	1	0.110521	238.063
Q14974	3	1	0.110521	238.063
PF3D7_1134100	18	2	0.112426	242.165
PF3D7_1224500	18	2	0.112426	242.165
PF3D7_1361800	84	5	0.115519	248.827
A0A0A0MQS8;Q02094	19	2	0.121974	262.732
PF3D7_0527500	19	2	0.121974	262.732
PF3D7_0811400	19	2	0.121974	262.732
PF3D7_1110500	19	2	0.121974	262.732
PF3D7_1470900	19	2	0.121974	262.732
PF3D7_0214100	41	3	0.133647	287.876
A0A087WXM8;P50895	4	1	0.136185	293.343
O75340	4	1	0.136185	293.343
P00918	4	1	0.136185	293.343
P20618	4	1	0.136185	293.343
PF3D7_0528700	4	1	0.136185	293.343
PF3D7_0623500	4	1	0.136185	293.343
PF3D7_0705300	4	1	0.136185	293.343
PF3D7_0914900	4	1	0.136185	293.343
PF3D7_1031500	4	1	0.136185	293.343
PF3D7_1325000	4	1	0.136185	293.343
PF3D7_1351100	4	1	0.136185	293.343
PF3D7_1423000	4	1	0.136185	293.343
Q13200	4	1	0.136185	293.343
Q8NCW5	4	1	0.136185	293.343
PF3D7_0626700	21	2	0.141615	305.038
PF3D7_1338100	21	2	0.141615	305.038
PF3D7_1226600	22	2	0.15167	326.697
A0A0A0MRA3;A0A0A0MTS7;Q8WZ42	5	1	0.161108	347.026
G3V5M2;P00491	5	1	0.161108	347.026
G3V5Z7;P60900	5	1	0.161108	347.026
H0YNJ6;Q9P2T1	5	1	0.161108	347.026
P28066	5	1	0.161108	347.026
PF3D7_0412000	5	1	0.161108	347.026
PF3D7_0704000	5	1	0.161108	347.026
PF3D7_1107000	5	1	0.161108	347.026
PF3D7_1227700	5	1	0.161108	347.026
PF3D7_1103100	23	2	0.16186	348.645
PF3D7_0608500	24	2	0.172167	370.847
PF3D7_1015200	24	2	0.172167	370.847
PF3D7_0629100	25	2	0.182576	393.27
PF3D7_0205500	6	1	0.185311	399.159
PF3D7_0317200	6	1	0.185311	399.159
PF3D7_0503400	6	1	0.185311	399.159
PF3D7_0821000	6	1	0.185311	399.159
PF3D7_0822300	6	1	0.185311	399.159
PF3D7_1132800	6	1	0.185311	399.159
PF3D7_1303200	6	1	0.185311	399.159
PF3D7_1334500	6	1	0.185311	399.159
PF3D7_1342400	6	1	0.185311	399.159
PF3D7_1343900	6	1	0.185311	399.159
PF3D7_1344800	6	1	0.185311	399.159
PF3D7_1367600	6	1	0.185311	399.159
PF3D7_1412600	6	1	0.185311	399.159
Q9GZT8	6	1	0.185311	399.159
PF3D7_1441200	26	2	0.193074	415.882
PF3D7_0622800	27	2	0.203646	438.653
PF3D7_0731600	27	2	0.203646	438.653
PF3D7_0814900	27	2	0.203646	438.653
P48637	7	1	0.208814	449.786
P69891	7	1	0.208814	449.786
PF3D7_0108700	7	1	0.208814	449.786
PF3D7_0508000	7	1	0.208814	449.786
PF3D7_0617800	7	1	0.208814	449.786
PF3D7_0831400	7	1	0.208814	449.786
PF3D7_1037300	7	1	0.208814	449.786
PF3D7_1206700	7	1	0.208814	449.786
PF3D7_1311400	7	1	0.208814	449.786
PF3D7_1315400	7	1	0.208814	449.786
PF3D7_1326100	7	1	0.208814	449.786
PF3D7_1349500	7	1	0.208814	449.786
PF3D7_1350200	7	1	0.208814	449.786
PF3D7_1405800	7	1	0.208814	449.786
Q14964	7	1	0.208814	449.786
PF3D7_0606700	28	2	0.214279	461.557
PF3D7_1118500	29	2	0.224961	484.565
PF3D7_1428300	29	2	0.224961	484.565
A0A087WWU8;Q5HYB6	8	1	0.231639	498.95
PF3D7_0106300	8	1	0.231639	498.95
PF3D7_0419600	8	1	0.231639	498.95
PF3D7_0622200	8	1	0.231639	498.95
PF3D7_0817700	8	1	0.231639	498.95
PF3D7_0829000	8	1	0.231639	498.95
PF3D7_1037700	8	1	0.231639	498.95
PF3D7_1231600	8	1	0.231639	498.95
PF3D7_1237000	8	1	0.231639	498.95
PF3D7_1316600	8	1	0.231639	498.95
PF3D7_1436300	8	1	0.231639	498.95
PF3D7_0607000	30	2	0.235679	507.654
PF3D7_0826700	30	2	0.235679	507.654
PF3D7_0610800	56	3	0.242367	522.058
PF3D7_1466300	56	3	0.242367	522.058
O75955	9	1	0.253804	546.694
P36959	9	1	0.253804	546.694
PF3D7_0103900	9	1	0.253804	546.694
PF3D7_0105200	9	1	0.253804	546.694
PF3D7_0218500	9	1	0.253804	546.694
PF3D7_0507600	9	1	0.253804	546.694
PF3D7_1142400	9	1	0.253804	546.694
PF3D7_1219900	9	1	0.253804	546.694
PF3D7_1250300	9	1	0.253804	546.694
PF3D7_1352500	9	1	0.253804	546.694
PF3D7_1446600	9	1	0.253804	546.694
PF3D7_1447900	9	1	0.253804	546.694
PF3D7_1459600	9	1	0.253804	546.694
PF3D7_1463200	9	1	0.253804	546.694
PF3D7_1360800	85	4	0.25588	551.166
PF3D7_0813400	32	2	0.257185	553.976
PF3D7_1338300	32	2	0.257185	553.976
PF3D7_0302200	58	3	0.257884	555.482
PF3D7_1118300	60	3	0.273526	589.175
O14980	10	1	0.275329	593.059
PF3D7_0806800	10	1	0.275329	593.059
PF3D7_0923000	10	1	0.275329	593.059
PF3D7_0934500	10	1	0.275329	593.059
PF3D7_1120500	10	1	0.275329	593.059
PF3D7_1332800	10	1	0.275329	593.059
PF3D7_1338700	10	1	0.275329	593.059
PF3D7_1345800	10	1	0.275329	593.059
PF3D7_1369700	10	1	0.275329	593.059
PF3D7_1451100	146	6	0.276538	595.662
P68871	35	2	0.289464	623.505
PF3D7_0517400	35	2	0.289464	623.505
PF3D7_0813300	35	2	0.289464	623.505
P09211	11	1	0.296233	638.085
PF3D7_0209400	11	1	0.296233	638.085
PF3D7_0303700	11	1	0.296233	638.085
PF3D7_0408500	11	1	0.296233	638.085
PF3D7_1012500	11	1	0.296233	638.085
PF3D7_1320600	11	1	0.296233	638.085
PF3D7_1342800	11	1	0.296233	638.085
PF3D7_1401800	11	1	0.296233	638.085
PF3D7_1405600	37	2	0.310895	669.668
K7N7A8;P29972	12	1	0.316532	681.811
P13716	12	1	0.316532	681.811
PF3D7_0905800	12	1	0.316532	681.811
PF3D7_1302100	12	1	0.316532	681.811
PF3D7_0517700	39	2	0.332184	715.524
PF3D7_0815200	39	2	0.332184	715.524
PF3D7_0306200	13	1	0.336246	724.274
PF3D7_0516700	13	1	0.336246	724.274
PF3D7_0623100	13	1	0.336246	724.274
PF3D7_0721100	13	1	0.336246	724.274
PF3D7_1136400	13	1	0.336246	724.274
PF3D7_1144900	13	1	0.336246	724.274
PF3D7_1248700	13	1	0.336246	724.274
PF3D7_1343700	13	1	0.336246	724.274
PF3D7_1438900	13	1	0.336246	724.274
PF3D7_0922600	40	2	0.342758	738.301
P00492	14	1	0.35539	765.51
P23526	14	1	0.35539	765.51
PF3D7_0109400	14	1	0.35539	765.51
PF3D7_0306300	14	1	0.35539	765.51
PF3D7_0815600	14	1	0.35539	765.51
PF3D7_1115700	14	1	0.35539	765.51
PF3D7_1328100	14	1	0.35539	765.51
PF3D7_1434200	14	1	0.35539	765.51
PF3D7_1466100	14	1	0.35539	765.51
PF3D7_0308200	42	2	0.363736	783.487
PF3D7_1308200	72	3	0.368276	793.266
A0A0C4DGQ5;P04632	15	1	0.373981	805.556
PF3D7_1414800	15	1	0.373981	805.556
PF3D7_1426700	15	1	0.373981	805.556
PF3D7_0926700	43	2	0.374129	805.873
PF3D7_1355100	44	2	0.38445	828.106
PF3D7_0322000	16	1	0.392036	844.445
PF3D7_0904800	16	1	0.392036	844.445
PF3D7_1028400	16	1	0.392036	844.445
PF3D7_1242700	16	1	0.392036	844.445
PF3D7_1431700	16	1	0.392036	844.445
PF3D7_1104400	45	2	0.394697	850.177
PF3D7_0405400	46	2	0.404864	872.077
PF3D7_1332900	77	3	0.407309	877.344
PF3D7_0807900	17	1	0.409569	882.212
PF3D7_0923900	17	1	0.409569	882.212
PF3D7_1434600	17	1	0.409569	882.212
PF3D7_1438700	17	1	0.409569	882.212
PF3D7_0925900	47	2	0.414947	893.797
PF3D7_1357800	47	2	0.414947	893.797
PF3D7_0303000	18	1	0.426596	918.888
PF3D7_0501000	18	1	0.426596	918.888
PF3D7_0528100	18	1	0.426596	918.888
PF3D7_0810600	18	1	0.426596	918.888
PF3D7_1464600	18	1	0.426596	918.888
P60174	19	1	0.443131	954.505
PF3D7_0621200	50	2	0.444661	957.8
PF3D7_1129100	20	1	0.459189	989.093
PF3D7_1315900	20	1	0.459189	989.093
P30043	21	1	0.474783	1022.68
PF3D7_1412300	21	1	0.474783	1022.68
PF3D7_0209800	54	2	0.48292	1040.21
PF3D7_0218000	22	1	0.489927	1055.3
PF3D7_0307100	22	1	0.489927	1055.3
PF3D7_0617200	22	1	0.489927	1055.3
PF3D7_0811600	22	1	0.489927	1055.3
PF3D7_0919400	22	1	0.489927	1055.3
PF3D7_1027300	22	1	0.489927	1055.3
PF3D7_1216900	22	1	0.489927	1055.3
PF3D7_1340600	22	1	0.489927	1055.3
PF3D7_1358800	22	1	0.489927	1055.3
PF3D7_1436000	55	2	0.492225	1060.25
PF3D7_0626800	123	4	0.500216	1077.47
PF3D7_1461900	56	2	0.501424	1080.07
PF3D7_0528200	23	1	0.504634	1086.98
PF3D7_0627800	23	1	0.504634	1086.98
PF3D7_1451800	23	1	0.504634	1086.98
PF3D7_0827900	92	3	0.518794	1117.48
PF3D7_1021600	24	1	0.518917	1117.75
PF3D7_0905400	60	2	0.537117	1156.95
PF3D7_1212700	60	2	0.537117	1156.95
PF3D7_1408000	60	2	0.537117	1156.95
PF3D7_1012600	26	1	0.546256	1176.64
PF3D7_0417200	27	1	0.559337	1204.81
PF3D7_0721600	27	1	0.559337	1204.81
PF3D7_1033100	27	1	0.559337	1204.81
PF3D7_1311500	27	1	0.559337	1204.81
PF3D7_1368200	27	1	0.559337	1204.81
PF3D7_1420400	27	1	0.559337	1204.81
PF3D7_1445900	27	1	0.559337	1204.81
PF3D7_0612100	28	1	0.57204	1232.17
PF3D7_1244100	28	1	0.57204	1232.17
PF3D7_1361100	28	1	0.57204	1232.17
PF3D7_0722400	29	1	0.584377	1258.75
PF3D7_1226300	29	1	0.584377	1258.75
PF3D7_1454700	29	1	0.584377	1258.75
PF3D7_1124600	30	1	0.596357	1284.55
Q13228	69	2	0.610756	1315.57
PF3D7_1462800	107	3	0.617836	1330.82
PF3D7_0513300	70	2	0.61836	1331.95
PF3D7_0935800	33	1	0.630264	1357.59
PF3D7_1034900	72	2	0.633222	1363.96
PF3D7_1015600	34	1	0.64092	1380.54
PF3D7_1027800	34	1	0.64092	1380.54
PF3D7_1213800	34	1	0.64092	1380.54
PF3D7_1234800	34	1	0.64092	1380.54
PF3D7_1238800	34	1	0.64092	1380.54
PF3D7_1222300	111	3	0.641775	1382.38
PF3D7_0627700	35	1	0.651269	1402.83
PF3D7_1117700	35	1	0.651269	1402.83
P16157	188	5	0.655874	1412.75
PF3D7_0929400	114	3	0.65902	1419.53
PF3D7_0932800	36	1	0.661319	1424.48
PF3D7_1003800	36	1	0.661319	1424.48
PF3D7_0207600	76	2	0.661574	1425.03
PF3D7_0818900	153	4	0.665852	1434.25
PF3D7_0500800	77	2	0.66838	1439.69
PF3D7_0309500	37	1	0.671079	1445.5
PF3D7_1107300	37	1	0.671079	1445.5
PF3D7_1224300	37	1	0.671079	1445.5
PF3D7_1437200	37	1	0.671079	1445.5
PF3D7_0802000	38	1	0.680558	1465.92
PF3D7_1017900	38	1	0.680558	1465.92
PF3D7_1419800	38	1	0.680558	1465.92
PF3D7_1402300	39	1	0.689763	1485.75
PF3D7_0406100	41	1	0.707384	1523.71
PF3D7_0320300	42	1	0.715815	1541.87
PF3D7_1410400	42	1	0.715815	1541.87
PF3D7_1349200	43	1	0.724003	1559.5
P69905	86	2	0.724713	1561.03
PF3D7_0922200	86	2	0.724713	1561.03
PF3D7_0802200	46	1	0.747177	1609.42
PF3D7_1229500	48	1	0.761533	1640.34
PF3D7_0608700	50	1	0.775073	1669.51
PF3D7_1350100	50	1	0.775073	1669.51
PF3D7_0708800	99	2	0.791581	1705.07
PF3D7_1417800	53	1	0.793954	1710.18
PF3D7_0525100	54	1	0.799888	1722.96
PF3D7_0910100	55	1	0.805651	1735.37
P04406	56	1	0.811248	1747.43
PF3D7_0818200	56	1	0.811248	1747.43
PF3D7_0915400	150	3	0.82001	1766.3
P11171	58	1	0.821963	1770.51
PF3D7_1420700	59	1	0.827089	1781.55
PF3D7_1008700	61	1	0.836903	1802.69
PF3D7_1252100	61	1	0.836903	1802.69
PF3D7_0524000	133	2	0.903241	1945.58
PF3D7_1468700	83	1	0.914212	1969.21
PF3D7_0708400	140	2	0.917837	1977.02
PF3D7_0220000	95	1	0.93956	2023.81
P02730	153	2	0.939596	2023.89
PF3D7_0619400	97	1	0.942986	2031.19
PF3D7_1357000	112	1	0.96319	2074.71
PF3D7_0917900	114	1	0.965275	2079.2
PF3D7_1324900	131	1	0.978844	2108.43
PF3D7_0930300	182	1	0.995207	2143.68
P11277	225	1	0.998626	2151.04
PF3D7_1149000	228	1	0.998741	2151.29
A0A024RA52;P25787	5	0	1	2154
A0A087WT99;A0A1W2PRB8;E9PJU8;E9PQS1;Q9H0W9	1	0	1	2154
A0A087WU29;A0A0C4DFT7;E7EQF3;E9PD10;E9PH25;P02724;Q13030	9	0	1	2154
A0A087WUQ6;P07203	10	0	1	2154
A0A087WUV8;A0A087X2B5;P35613	2	0	1	2154
A0A087WVQ6;Q00610	13	0	1	2154
A0A087WVQ9;P68104;Q05639;Q5VTE0	1	0	1	2154
A0A087WXG3;Q8NDY6;Q8NFJ8	1	0	1	2154
A0A087WY82;Q9Y624	3	0	1	2154
A0A087X0A8;D6RGG3;H0Y4P7;Q99715	1	0	1	2154
A0A087X0I0;A0A140T8Y3;A0A140T8Z8;A0A140T902;A0A140T9C0;A0A140T9L7;A0A140TA33;A0A140TA41;A0A140TA52;P22105	1	0	1	2154
A0A087X0K1;Q9Y376	2	0	1	2154
A0A087X253;P63010	3	0	1	2154
A0A0A0MSI0;Q06830	3	0	1	2154
A0A0B4J1R6;P29401	2	0	1	2154
A0A0C4DG71;A0A0G2JQM2;A0A0G2JR20;A0A0G2JR50;Q86SQ7	1	0	1	2154
A0A0C4DGB6;B7WNR0;D6RHD5;H0YA55;P02768	12	0	1	2154
A0A0G2JIW1;P0DMV8;P0DMV9	22	0	1	2154
A0A0J9YYC8;A6XMV8;A6XMV9;E7EQ64;H0Y8D1;P07477;P07478;Q8NHM4	1	0	1	2154
A0A0U1RQN6;B7Z651;D6RHE1;E9PHW9;I6L894;Q01484	2	0	1	2154
A0A0U1RR32;A0A0U1RRH7;P04908;P0C0S8;P16104;P20671;Q7L7L0;Q93077;Q96KK5;Q99878;Q9BTM1	7	0	1	2154
A0A1C7CYY4;I3L1K6;I3L1R3;I3L3U1;I3L532;P12829	1	0	1	2154
A6NFX8;A6NJU6;Q9UKK9	6	0	1	2154
A6NHL2	2	0	1	2154
A6NJA2;P54578	2	0	1	2154
B0QZ18;F2Z2V0;Q99829	2	0	1	2154
B1AN99;P35030	1	0	1	2154
B4DJ81;P28331	1	0	1	2154
B4DUC8;J3QSB7;Q13126	5	0	1	2154
B4DUR8;P49368	6	0	1	2154
B4DV12;F5GXK7;F5GYU3;F5H265;F5H2Z3;F5H388;F5H6Q2;F5H747;J3QKN0;J3QS39;J3QTR3;P0CG47;P0CG48;P62979;P62987;Q5PY61;Q96C32	2	0	1	2154
B5MDF5;F5H018;J3KQE5;P62826	12	0	1	2154
B7ZAR1;E7ENZ3;E9PCA1;P48643	3	0	1	2154
C9J1E1;P53004	1	0	1	2154
C9J8H1;P36543	1	0	1	2154
C9JIG9;O95747	1	0	1	2154
C9JNR4;C9JX21;E9PQH6;P08134;P61586;Q5JR05;Q5JR07;Q5JR08;U3KQA9;U3KQV3	4	0	1	2154
C9JQT8;C9JUV8;E9PRR1;O00478;P78410;S4R3N0	1	0	1	2154
C9JXJ9;F5H543;F6VN83;H7C0X6;Q6PHW0;transcript=PF3D7_1372000.1	1	0	1	2154
D3YTI2;F2Z2Q9;G5E9R5;P24666	1	0	1	2154
D6RCF4;Q8N5K1	2	0	1	2154
E1CEI4;P48506	2	0	1	2154
E5RI56;P67775	1	0	1	2154
E5RJX4;P62714	1	0	1	2154
E7EM64;Q7L5N1	1	0	1	2154
E7END7;P62820	6	0	1	2154
E7ERL0;J3KPD9;P15531;P22392;Q32Q12	3	0	1	2154
E7EU96;P68400	4	0	1	2154
E7EX29;P63104	1	0	1	2154
E9PHR9;Q9NRQ2	1	0	1	2154
E9PKU7;E9PNH1;F5H6X6;Q14697	1	0	1	2154
E9PL09;E9PPU1;H0YEU2;P23396	3	0	1	2154
E9PLJ0;O95373	1	0	1	2154
E9PLK3;P55786	5	0	1	2154
E9PM69;P17980;R4GNH3	3	0	1	2154
E9PNW4;E9PR17;P13987	5	0	1	2154
E9PQ73;Q8TDW7	1	0	1	2154
F5GWF6;F8VQ14;P78371	3	0	1	2154
F5H442;J3QKS4;J3QRU6;Q99816	1	0	1	2154
F6TLX2;Q9HC38	2	0	1	2154
F6XSS0;P18577	5	0	1	2154
F8VNQ3;G3V106;Q9NT68	2	0	1	2154
F8W079;H0YH81;P06576	1	0	1	2154
F8W914;Q9NQC3	1	0	1	2154
F8W9S7;Q14C86	6	0	1	2154
F8WBF9;Q5TH30;Q9UGV2	2	0	1	2154
G3V180;G3V1D3;Q9NY33	4	0	1	2154
H0Y2P0;H0Y5E4;H0YCV9;H0YD13;H0YD17;H0YDW7;H0YDX6;P16070	1	0	1	2154
H0Y3Z3;H7BZ94;P07237	5	0	1	2154
H0Y3Z4;H0Y6T7;Q5T205;Q92542	2	0	1	2154
H0Y4J6;H0YID2;P00568;Q5T9B7;Q9Y6K8	1	0	1	2154
H0YJX6;O14744	1	0	1	2154
H0YN18;P25789	3	0	1	2154
H3BMU1;H3BUI0;J3KR23;P53990	2	0	1	2154
H3BPK3;Q16775	8	0	1	2154
H3BPS8;H3BQN4;J3KPS3;P04075	2	0	1	2154
H7BYY1	8	0	1	2154
I3L0K2;I3L3M7;Q9BRA2	1	0	1	2154
I3L0N3;P46459	3	0	1	2154
I6L8B7;Q01469	1	0	1	2154
J3KQ32;Q9NTK5	3	0	1	2154
J3KS22;J3QS36;Q7Z4W1	2	0	1	2154
O00231	1	0	1	2154
O14818	3	0	1	2154
O15020	3	0	1	2154
O15165	1	0	1	2154
O60814;P06899;P23527;P33778;P57053;P58876;P62807;Q16778;Q5QNW6;Q93079;Q99877;Q99879;Q99880;U3KQK0	3	0	1	2154
O75131	3	0	1	2154
O75695	3	0	1	2154
O94768	1	0	1	2154
O94919	4	0	1	2154
O95197	1	0	1	2154
O95782	2	0	1	2154
P00338	5	0	1	2154
P00352	10	0	1	2154
P00387	3	0	1	2154
P00441	25	0	1	2154
P00915	32	0	1	2154
P01111;P01112;P01116	1	0	1	2154
P02533	5	0	1	2154
P02538;P48668	1	0	1	2154
P02549	229	0	1	2154
P02675	1	0	1	2154
P04259	2	0	1	2154
P04264	14	0	1	2154
P04350	2	0	1	2154
P04921	2	0	1	2154
P05546	2	0	1	2154
P06733	6	0	1	2154
P07996	3	0	1	2154
P08758	4	0	1	2154
P10644	5	0	1	2154
P10768;X6RA14	4	0	1	2154
P11142	40	0	1	2154
P12955	2	0	1	2154
P13645	15	0	1	2154
P13796	5	0	1	2154
P14174	1	0	1	2154
P16152	4	0	1	2154
P16452	59	0	1	2154
P17066	2	0	1	2154
P17174	6	0	1	2154
P17612	4	0	1	2154
P18054	2	0	1	2154
P18206	1	0	1	2154
P19320	2	0	1	2154
P20073	10	0	1	2154
P23276	10	0	1	2154
P23634	11	0	1	2154
P25786	7	0	1	2154
P25788	4	0	1	2154
P27348	1	0	1	2154
P28072	1	0	1	2154
P28289	19	0	1	2154
P29144;Q5VZU9	3	0	1	2154
P30041	8	0	1	2154
P30085;Q5T0D2	2	0	1	2154
P30740	6	0	1	2154
P31939	4	0	1	2154
P31946	2	0	1	2154
P32119	33	0	1	2154
P35527	1	0	1	2154
P35579;P35580	1	0	1	2154
P35611	36	0	1	2154
P35612	41	0	1	2154
P35908	13	0	1	2154
P38919	3	0	1	2154
P40227	2	0	1	2154
P40925	9	0	1	2154
P41091	1	0	1	2154
P43686	3	0	1	2154
P48147	1	0	1	2154
P48426	6	0	1	2154
P48729	6	0	1	2154
P49247	7	0	1	2154
P49591;Q5T5C7	1	0	1	2154
P49721	2	0	1	2154
P50395	5	0	1	2154
P50502;Q8NFI4	4	0	1	2154
P50990	5	0	1	2154
P50991	5	0	1	2154
P53396	2	0	1	2154
P55072	25	0	1	2154
P60709	47	0	1	2154
P60842	14	0	1	2154
P61006	1	0	1	2154
P61020	3	0	1	2154
P61026	2	0	1	2154
P61224	6	0	1	2154
P61812	1	0	1	2154
P61981	2	0	1	2154
P62191	8	0	1	2154
P62195	8	0	1	2154
P62258	12	0	1	2154
P62736;P63267;P68032;P68133	3	0	1	2154
P62805	5	0	1	2154
P62834	1	0	1	2154
P62906	2	0	1	2154
P63000	5	0	1	2154
P63220;Q8WVC2;Q9BYK1;Q9BYK2	1	0	1	2154
P68363	2	0	1	2154
P78417;Q5TA02	5	0	1	2154
PF3D7_0101300	1	0	1	2154
PF3D7_0102200	35	0	1	2154
PF3D7_0102900	32	0	1	2154
PF3D7_0103100	3	0	1	2154
PF3D7_0103200	4	0	1	2154
PF3D7_0103300	4	0	1	2154
PF3D7_0104200	7	0	1	2154
PF3D7_0104400	2	0	1	2154
PF3D7_0104500	11	0	1	2154
PF3D7_0105300	8	0	1	2154
PF3D7_0105600	3	0	1	2154
PF3D7_0105700	2	0	1	2154
PF3D7_0105800	2	0	1	2154
PF3D7_0106000	4	0	1	2154
PF3D7_0106100	15	0	1	2154
PF3D7_0106400	5	0	1	2154
PF3D7_0106700	7	0	1	2154
PF3D7_0106800	3	0	1	2154
PF3D7_0107000	7	0	1	2154
PF3D7_0107500	13	0	1	2154
PF3D7_0108300	32	0	1	2154
PF3D7_0108500	19	0	1	2154
PF3D7_0109200	2	0	1	2154
PF3D7_0109500	2	0	1	2154
PF3D7_0109800	17	0	1	2154
PF3D7_0110100	1	0	1	2154
PF3D7_0110400	5	0	1	2154
PF3D7_0110500	5	0	1	2154
PF3D7_0110600	4	0	1	2154
PF3D7_0110700	18	0	1	2154
PF3D7_0110800	4	0	1	2154
PF3D7_0110900	4	0	1	2154
PF3D7_0111400	6	0	1	2154
PF3D7_0111500	10	0	1	2154
PF3D7_0111800	5	0	1	2154
PF3D7_0112000	10	0	1	2154
PF3D7_0112200	5	0	1	2154
PF3D7_0113000	5	0	1	2154
PF3D7_0202400	4	0	1	2154
PF3D7_0202600	3	0	1	2154
PF3D7_0203100	1	0	1	2154
PF3D7_0203400	1	0	1	2154
PF3D7_0203700	1	0	1	2154
PF3D7_0204100	4	0	1	2154
PF3D7_0204500	12	0	1	2154
PF3D7_0204700	11	0	1	2154
PF3D7_0205400	6	0	1	2154
PF3D7_0205600	3	0	1	2154
PF3D7_0205900	53	0	1	2154
PF3D7_0206000	1	0	1	2154
PF3D7_0206700	15	0	1	2154
PF3D7_0207000	3	0	1	2154
PF3D7_0207400	11	0	1	2154
PF3D7_0207500	27	0	1	2154
PF3D7_0207700	20	0	1	2154
PF3D7_0207800	4	0	1	2154
PF3D7_0208100	2	0	1	2154
PF3D7_0208200	4	0	1	2154
PF3D7_0208400	2	0	1	2154
PF3D7_0208500	5	0	1	2154
PF3D7_0209100	3	0	1	2154
PF3D7_0210000	2	0	1	2154
PF3D7_0210100	3	0	1	2154
PF3D7_0210200	8	0	1	2154
PF3D7_0210900	5	0	1	2154
PF3D7_0211200	3	0	1	2154
PF3D7_0211800	41	0	1	2154
PF3D7_0212300	19	0	1	2154
PF3D7_0212400	4	0	1	2154
PF3D7_0212500	7	0	1	2154
PF3D7_0212900	5	0	1	2154
PF3D7_0213500	2	0	1	2154
PF3D7_0213700	3	0	1	2154
PF3D7_0213900	1	0	1	2154
PF3D7_0214000	46	0	1	2154
PF3D7_0214400	5	0	1	2154
PF3D7_0215000	6	0	1	2154
PF3D7_0215500	2	0	1	2154
PF3D7_0215700	22	0	1	2154
PF3D7_0215800	4	0	1	2154
PF3D7_0216200	1	0	1	2154
PF3D7_0216400	8	0	1	2154
PF3D7_0217100	4	0	1	2154
PF3D7_0217500	11	0	1	2154
PF3D7_0217800	3	0	1	2154
PF3D7_0217900	19	0	1	2154
PF3D7_0218200	2	0	1	2154
PF3D7_0218400	4	0	1	2154
PF3D7_0219400	1	0	1	2154
PF3D7_0219600	9	0	1	2154
PF3D7_0301700	3	0	1	2154
PF3D7_0302000	3	0	1	2154
PF3D7_0302100	6	0	1	2154
PF3D7_0302500	9	0	1	2154
PF3D7_0302800	3	0	1	2154
PF3D7_0302900	62	0	1	2154
PF3D7_0303100	3	0	1	2154
PF3D7_0303200	6	0	1	2154
PF3D7_0303300	4	0	1	2154
PF3D7_0304200	8	0	1	2154
PF3D7_0304400	1	0	1	2154
PF3D7_0305200	7	0	1	2154
PF3D7_0305300	4	0	1	2154
PF3D7_0305500	3	0	1	2154
PF3D7_0305600	12	0	1	2154
PF3D7_0305700	11	0	1	2154
PF3D7_0306800	56	0	1	2154
PF3D7_0306900	6	0	1	2154
PF3D7_0307200	19	0	1	2154
PF3D7_0307500	5	0	1	2154
PF3D7_0308000	14	0	1	2154
PF3D7_0308500	9	0	1	2154
PF3D7_0308600	18	0	1	2154
PF3D7_0308900	12	0	1	2154
PF3D7_0309000	4	0	1	2154
PF3D7_0309300	5	0	1	2154
PF3D7_0309600	31	0	1	2154
PF3D7_0310300	13	0	1	2154
PF3D7_0310400	42	0	1	2154
PF3D7_0310500	7	0	1	2154
PF3D7_0310600	13	0	1	2154
PF3D7_0310700	2	0	1	2154
PF3D7_0311300	4	0	1	2154
PF3D7_0312300	13	0	1	2154
PF3D7_0312400	14	0	1	2154
PF3D7_0312500	1	0	1	2154
PF3D7_0312800	14	0	1	2154
PF3D7_0314000	8	0	1	2154
PF3D7_0314400	2	0	1	2154
PF3D7_0315100	18	0	1	2154
PF3D7_0315800	4	0	1	2154
PF3D7_0316300	18	0	1	2154
PF3D7_0316500	8	0	1	2154
PF3D7_0316600	5	0	1	2154
PF3D7_0316800	9	0	1	2154
PF3D7_0317300	18	0	1	2154
PF3D7_0317400	5	0	1	2154
PF3D7_0317600	11	0	1	2154
PF3D7_0317700	4	0	1	2154
PF3D7_0317800	15	0	1	2154
PF3D7_0318100	2	0	1	2154
PF3D7_0318200	34	0	1	2154
PF3D7_0318300	4	0	1	2154
PF3D7_0319100	4	0	1	2154
PF3D7_0319200	7	0	1	2154
PF3D7_0319600	15	0	1	2154
PF3D7_0319900	4	0	1	2154
PF3D7_0320000	3	0	1	2154
PF3D7_0320100	5	0	1	2154
PF3D7_0320500	16	0	1	2154
PF3D7_0320700	1	0	1	2154
PF3D7_0320800	13	0	1	2154
PF3D7_0320900	6	0	1	2154
PF3D7_0321500	8	0	1	2154
PF3D7_0322100	1	0	1	2154
PF3D7_0322400	5	0	1	2154
PF3D7_0322900	24	0	1	2154
PF3D7_0323000	4	0	1	2154
PF3D7_0323500	4	0	1	2154
PF3D7_0323700	5	0	1	2154
PF3D7_0401800	12	0	1	2154
PF3D7_0402000	12	0	1	2154
PF3D7_0402100	4	0	1	2154
PF3D7_0402400	4	0	1	2154
PF3D7_0403200	2	0	1	2154
PF3D7_0403600	2	0	1	2154
PF3D7_0403700	5	0	1	2154
PF3D7_0404300	4	0	1	2154
PF3D7_0404900	9	0	1	2154
PF3D7_0405100	9	0	1	2154
PF3D7_0405500	1	0	1	2154
PF3D7_0405600	4	0	1	2154
PF3D7_0406000	2	0	1	2154
PF3D7_0406200	4	0	1	2154
PF3D7_0406700	1	0	1	2154
PF3D7_0407900	3	0	1	2154
PF3D7_0408100	2	0	1	2154
PF3D7_0408300	1	0	1	2154
PF3D7_0409100	5	0	1	2154
PF3D7_0409300	3	0	1	2154
PF3D7_0409400	1	0	1	2154
PF3D7_0409600	15	0	1	2154
PF3D7_0410300	1	0	1	2154
PF3D7_0410400	4	0	1	2154
PF3D7_0410600	16	0	1	2154
PF3D7_0410800	11	0	1	2154
PF3D7_0410900	5	0	1	2154
PF3D7_0411900	15	0	1	2154
PF3D7_0412200	6	0	1	2154
PF3D7_0413600	26	0	1	2154
PF3D7_0413700	14	0	1	2154
PF3D7_0413900	26	0	1	2154
PF3D7_0414000	14	0	1	2154
PF3D7_0415000	18	0	1	2154
PF3D7_0415300	5	0	1	2154
PF3D7_0415400	1	0	1	2154
PF3D7_0415500	2	0	1	2154
PF3D7_0415900	12	0	1	2154
PF3D7_0416400	6	0	1	2154
PF3D7_0416500	2	0	1	2154
PF3D7_0416800	25	0	1	2154
PF3D7_0417500	17	0	1	2154
PF3D7_0418200	23	0	1	2154
PF3D7_0418500	4	0	1	2154
PF3D7_0418700	3	0	1	2154
PF3D7_0419400	7	0	1	2154
PF3D7_0419800	7	0	1	2154
PF3D7_0420100	2	0	1	2154
PF3D7_0420600	3	0	1	2154
PF3D7_0422300	2	0	1	2154
PF3D7_0422400	30	0	1	2154
PF3D7_0422500	35	0	1	2154
PF3D7_0422700	8	0	1	2154
PF3D7_0423200	1	0	1	2154
PF3D7_0423600	8	0	1	2154
PF3D7_0423700	1	0	1	2154
PF3D7_0423800	1	0	1	2154
PF3D7_0424600	13	0	1	2154
PF3D7_0501200	22	0	1	2154
PF3D7_0501300	13	0	1	2154
PF3D7_0501500	7	0	1	2154
PF3D7_0501600	9	0	1	2154
PF3D7_0501800	7	0	1	2154
PF3D7_0502100	3	0	1	2154
PF3D7_0503200	6	0	1	2154
PF3D7_0503300	4	0	1	2154
PF3D7_0503800	2	0	1	2154
PF3D7_0504000	6	0	1	2154
PF3D7_0504600	8	0	1	2154
PF3D7_0505000	5	0	1	2154
PF3D7_0505100	8	0	1	2154
PF3D7_0505200	12	0	1	2154
PF3D7_0505500	29	0	1	2154
PF3D7_0505800	14	0	1	2154
PF3D7_0505900	3	0	1	2154
PF3D7_0506100	2	0	1	2154
PF3D7_0506800	5	0	1	2154
PF3D7_0506900	3	0	1	2154
PF3D7_0507100	31	0	1	2154
PF3D7_0507700	24	0	1	2154
PF3D7_0507800	8	0	1	2154
PF3D7_0508300	2	0	1	2154
PF3D7_0508700	4	0	1	2154
PF3D7_0508800	3	0	1	2154
PF3D7_0508900	2	0	1	2154
PF3D7_0509000	10	0	1	2154
PF3D7_0509100	15	0	1	2154
PF3D7_0509400	13	0	1	2154
PF3D7_0509900	1	0	1	2154
PF3D7_0510100	9	0	1	2154
PF3D7_0510500	5	0	1	2154
PF3D7_0511000	27	0	1	2154
PF3D7_0511300	3	0	1	2154
PF3D7_0511500	34	0	1	2154
PF3D7_0511700	1	0	1	2154
PF3D7_0512000	10	0	1	2154
PF3D7_0512300	1	0	1	2154
PF3D7_0512500	1	0	1	2154
PF3D7_0512600	8	0	1	2154
PF3D7_0512700	13	0	1	2154
PF3D7_0513100	4	0	1	2154
PF3D7_0513200	3	0	1	2154
PF3D7_0513600	15	0	1	2154
PF3D7_0513800	4	0	1	2154
PF3D7_0514900	1	0	1	2154
PF3D7_0515000	4	0	1	2154
PF3D7_0515700	4	0	1	2154
PF3D7_0515800	2	0	1	2154
PF3D7_0516200	20	0	1	2154
PF3D7_0516300	1	0	1	2154
PF3D7_0516400	5	0	1	2154
PF3D7_0516800	3	0	1	2154
PF3D7_0516900	14	0	1	2154
PF3D7_0517000	12	0	1	2154
PF3D7_0517300	17	0	1	2154
PF3D7_0518500	5	0	1	2154
PF3D7_0519400	15	0	1	2154
PF3D7_0519500	3	0	1	2154
PF3D7_0519600	2	0	1	2154
PF3D7_0519800	5	0	1	2154
PF3D7_0520000	21	0	1	2154
PF3D7_0520200	5	0	1	2154
PF3D7_0520300	8	0	1	2154
PF3D7_0520400	3	0	1	2154
PF3D7_0520600	3	0	1	2154
PF3D7_0520900	57	0	1	2154
PF3D7_0521700	10	0	1	2154
PF3D7_0521900	1	0	1	2154
PF3D7_0522200	2	0	1	2154
PF3D7_0522300	3	0	1	2154
PF3D7_0522800	2	0	1	2154
PF3D7_0523000	18	0	1	2154
PF3D7_0523100	7	0	1	2154
PF3D7_0523400	3	0	1	2154
PF3D7_0523600	1	0	1	2154
PF3D7_0523800	1	0	1	2154
PF3D7_0524300	6	0	1	2154
PF3D7_0524400	22	0	1	2154
PF3D7_0524600	3	0	1	2154
PF3D7_0524900	4	0	1	2154
PF3D7_0525400	1	0	1	2154
PF3D7_0526500	7	0	1	2154
PF3D7_0526900	2	0	1	2154
PF3D7_0527000	39	0	1	2154
PF3D7_0527100	16	0	1	2154
PF3D7_0527200	21	0	1	2154
PF3D7_0527600	6	0	1	2154
PF3D7_0527900	8	0	1	2154
PF3D7_0528000	6	0	1	2154
PF3D7_0528800	5	0	1	2154
PF3D7_0529000	1	0	1	2154
PF3D7_0529400	13	0	1	2154
PF3D7_0529500	6	0	1	2154
PF3D7_0529800	4	0	1	2154
PF3D7_0530000	1	0	1	2154
PF3D7_0530900	3	0	1	2154
PF3D7_0532300	16	0	1	2154
PF3D7_0532400	10	0	1	2154
PF3D7_0602100	13	0	1	2154
PF3D7_0602200	6	0	1	2154
PF3D7_0602400	3	0	1	2154
PF3D7_0602500	3	0	1	2154
PF3D7_0602600	5	0	1	2154
PF3D7_0603400	12	0	1	2154
PF3D7_0604300	1	0	1	2154
PF3D7_0604500	25	0	1	2154
PF3D7_0605100	22	0	1	2154
PF3D7_0606100	4	0	1	2154
PF3D7_0606500	1	0	1	2154
PF3D7_0606600	13	0	1	2154
PF3D7_0606800	10	0	1	2154
PF3D7_0606900	7	0	1	2154
PF3D7_0608000	1	0	1	2154
PF3D7_0608800	123	0	1	2154
PF3D7_0608900	2	0	1	2154
PF3D7_0609000	9	0	1	2154
PF3D7_0610200	8	0	1	2154
PF3D7_0610400	4	0	1	2154
PF3D7_0610500	9	0	1	2154
PF3D7_0610900	12	0	1	2154
PF3D7_0611400	9	0	1	2154
PF3D7_0611800	2	0	1	2154
PF3D7_0611900	5	0	1	2154
PF3D7_0612200	3	0	1	2154
PF3D7_0612600	1	0	1	2154
PF3D7_0612700	6	0	1	2154
PF3D7_0612900	10	0	1	2154
PF3D7_0613300	1	0	1	2154
PF3D7_0613500	1	0	1	2154
PF3D7_0613700	7	0	1	2154
PF3D7_0613800	9	0	1	2154
PF3D7_0614300	1	0	1	2154
PF3D7_0614400	3	0	1	2154
PF3D7_0614500	5	0	1	2154
PF3D7_0615400	8	0	1	2154
PF3D7_0615600	4	0	1	2154
PF3D7_0615800	4	0	1	2154
PF3D7_0616100	2	0	1	2154
PF3D7_0616200	6	0	1	2154
PF3D7_0616300	3	0	1	2154
PF3D7_0617100	3	0	1	2154
PF3D7_0618200	14	0	1	2154
PF3D7_0618300	9	0	1	2154
PF3D7_0618500	14	0	1	2154
PF3D7_0618700	5	0	1	2154
PF3D7_0619000	6	0	1	2154
PF3D7_0619500	41	0	1	2154
PF3D7_0619900	2	0	1	2154
PF3D7_0620500	3	0	1	2154
PF3D7_0621100	1	0	1	2154
PF3D7_0621300	7	0	1	2154
PF3D7_0621800	20	0	1	2154
PF3D7_0621900	13	0	1	2154
PF3D7_0622500	3	0	1	2154
PF3D7_0623000	6	0	1	2154
PF3D7_0623600	9	0	1	2154
PF3D7_0623900	3	0	1	2154
PF3D7_0624000	59	0	1	2154
PF3D7_0624600	36	0	1	2154
PF3D7_0625600	5	0	1	2154
PF3D7_0626000	9	0	1	2154
PF3D7_0626200	1	0	1	2154
PF3D7_0627100	1	0	1	2154
PF3D7_0627300	1	0	1	2154
PF3D7_0627500	41	0	1	2154
PF3D7_0628100	3	0	1	2154
PF3D7_0628200	8	0	1	2154
PF3D7_0628600	2	0	1	2154
PF3D7_0629200	11	0	1	2154
PF3D7_0629400	5	0	1	2154
PF3D7_0629700	13	0	1	2154
PF3D7_0629800	10	0	1	2154
PF3D7_0629900	6	0	1	2154
PF3D7_0630300	17	0	1	2154
PF3D7_0630500	5	0	1	2154
PF3D7_0630600	5	0	1	2154
PF3D7_0630900	4	0	1	2154
PF3D7_0701600	1	0	1	2154
PF3D7_0702400	2	0	1	2154
PF3D7_0702500	5	0	1	2154
PF3D7_0702900	2	0	1	2154
PF3D7_0703100	1	0	1	2154
PF3D7_0703200	5	0	1	2154
PF3D7_0703500	49	0	1	2154
PF3D7_0703600	2	0	1	2154
PF3D7_0703700	6	0	1	2154
PF3D7_0703900	3	0	1	2154
PF3D7_0704200	9	0	1	2154
PF3D7_0704300	10	0	1	2154
PF3D7_0704400	4	0	1	2154
PF3D7_0704600	12	0	1	2154
PF3D7_0704700	1	0	1	2154
PF3D7_0705000	2	0	1	2154
PF3D7_0705400	43	0	1	2154
PF3D7_0705500	4	0	1	2154
PF3D7_0705700	6	0	1	2154
PF3D7_0706000	53	0	1	2154
PF3D7_0706400	2	0	1	2154
PF3D7_0706500	12	0	1	2154
PF3D7_0707200	6	0	1	2154
PF3D7_0707300	14	0	1	2154
PF3D7_0707600	1	0	1	2154
PF3D7_0707900	1	0	1	2154
PF3D7_0708100	2	0	1	2154
PF3D7_0708300	5	0	1	2154
PF3D7_0709000	2	0	1	2154
PF3D7_0709300	7	0	1	2154
PF3D7_0709400	1	0	1	2154
PF3D7_0709500	6	0	1	2154
PF3D7_0709700	10	0	1	2154
PF3D7_0710200	26	0	1	2154
PF3D7_0710600	3	0	1	2154
PF3D7_0711000	5	0	1	2154
PF3D7_0711300	1	0	1	2154
PF3D7_0711500	31	0	1	2154
PF3D7_0713700	5	0	1	2154
PF3D7_0714000	12	0	1	2154
PF3D7_0714200	11	0	1	2154
PF3D7_0714500	10	0	1	2154
PF3D7_0715000	5	0	1	2154
PF3D7_0715200	5	0	1	2154
PF3D7_0715600	3	0	1	2154
PF3D7_0715900	6	0	1	2154
PF3D7_0716000	5	0	1	2154
PF3D7_0716100	3	0	1	2154
PF3D7_0716300	10	0	1	2154
PF3D7_0716800	22	0	1	2154
PF3D7_0717400	6	0	1	2154
PF3D7_0717500	10	0	1	2154
PF3D7_0717700	22	0	1	2154
PF3D7_0718500	15	0	1	2154
PF3D7_0719000	5	0	1	2154
PF3D7_0719600	12	0	1	2154
PF3D7_0719700	16	0	1	2154
PF3D7_0720200	4	0	1	2154
PF3D7_0720400	15	0	1	2154
PF3D7_0720800	6	0	1	2154
PF3D7_0721000	1	0	1	2154
PF3D7_0721300	3	0	1	2154
PF3D7_0721400	10	0	1	2154
PF3D7_0721800	4	0	1	2154
PF3D7_0722100	1	0	1	2154
PF3D7_0722200	2	0	1	2154
PF3D7_0722500	2	0	1	2154
PF3D7_0723400	4	0	1	2154
PF3D7_0723800	14	0	1	2154
PF3D7_0723900	7	0	1	2154
PF3D7_0724000	1	0	1	2154
PF3D7_0724200	1	0	1	2154
PF3D7_0724700	5	0	1	2154
PF3D7_0725200	1	0	1	2154
PF3D7_0725300	6	0	1	2154
PF3D7_0726500	15	0	1	2154
PF3D7_0727900	4	0	1	2154
PF3D7_0728600	2	0	1	2154
PF3D7_0729000	5	0	1	2154
PF3D7_0729100	8	0	1	2154
PF3D7_0729200	5	0	1	2154
PF3D7_0729300	8	0	1	2154
PF3D7_0729400	1	0	1	2154
PF3D7_0729500	4	0	1	2154
PF3D7_0730200	5	0	1	2154
PF3D7_0730400	1	0	1	2154
PF3D7_0730900	8	0	1	2154
PF3D7_0731300	5	0	1	2154
PF3D7_0731500	6	0	1	2154
PF3D7_0801000	13	0	1	2154
PF3D7_0801800	44	0	1	2154
PF3D7_0802100	5	0	1	2154
PF3D7_0802300	2	0	1	2154
PF3D7_0802800	3	0	1	2154
PF3D7_0803100	3	0	1	2154
PF3D7_0803400	2	0	1	2154
PF3D7_0803600	4	0	1	2154
PF3D7_0803700	6	0	1	2154
PF3D7_0804500	8	0	1	2154
PF3D7_0804600	6	0	1	2154
PF3D7_0804800	6	0	1	2154
PF3D7_0804900	9	0	1	2154
PF3D7_0805700	12	0	1	2154
PF3D7_0807000	4	0	1	2154
PF3D7_0807100	1	0	1	2154
PF3D7_0807300	11	0	1	2154
PF3D7_0807600	14	0	1	2154
PF3D7_0807800	19	0	1	2154
PF3D7_0808100	4	0	1	2154
PF3D7_0808300	8	0	1	2154
PF3D7_0808400	16	0	1	2154
PF3D7_0810000	4	0	1	2154
PF3D7_0810300	5	0	1	2154
PF3D7_0810500	6	0	1	2154
PF3D7_0810800	27	0	1	2154
PF3D7_0811000	9	0	1	2154
PF3D7_0811200	4	0	1	2154
PF3D7_0811300	2	0	1	2154
PF3D7_0811500	3	0	1	2154
PF3D7_0812100	23	0	1	2154
PF3D7_0812400	49	0	1	2154
PF3D7_0812500	5	0	1	2154
PF3D7_0812600	4	0	1	2154
PF3D7_0813000	2	0	1	2154
PF3D7_0813200	7	0	1	2154
PF3D7_0813500	4	0	1	2154
PF3D7_0813600	5	0	1	2154
PF3D7_0813900	8	0	1	2154
PF3D7_0814000	21	0	1	2154
PF3D7_0814200	29	0	1	2154
PF3D7_0815800	7	0	1	2154
PF3D7_0816000	9	0	1	2154
PF3D7_0816100	2	0	1	2154
PF3D7_0816600	10	0	1	2154
PF3D7_0817300	5	0	1	2154
PF3D7_0817500	9	0	1	2154
PF3D7_0817900	2	0	1	2154
PF3D7_0818400	2	0	1	2154
PF3D7_0818700	5	0	1	2154
PF3D7_0819000	3	0	1	2154
PF3D7_0819100	1	0	1	2154
PF3D7_0819500	1	0	1	2154
PF3D7_0819600	8	0	1	2154
PF3D7_0819900	10	0	1	2154
PF3D7_0820000	4	0	1	2154
PF3D7_0820700	2	0	1	2154
PF3D7_0821300	7	0	1	2154
PF3D7_0821400	4	0	1	2154
PF3D7_0821600	4	0	1	2154
PF3D7_0821700	8	0	1	2154
PF3D7_0822100	3	0	1	2154
PF3D7_0822600	34	0	1	2154
PF3D7_0822800	7	0	1	2154
PF3D7_0823100	6	0	1	2154
PF3D7_0823200	15	0	1	2154
PF3D7_0823300	17	0	1	2154
PF3D7_0823800	3	0	1	2154
PF3D7_0824200	6	0	1	2154
PF3D7_0824400	5	0	1	2154
PF3D7_0824600	4	0	1	2154
PF3D7_0824900	3	0	1	2154
PF3D7_0825000	7	0	1	2154
PF3D7_0825500	1	0	1	2154
PF3D7_0826100	29	0	1	2154
PF3D7_0826500	19	0	1	2154
PF3D7_0827000	4	0	1	2154
PF3D7_0827800	3	0	1	2154
PF3D7_0828300	3	0	1	2154
PF3D7_0828500	9	0	1	2154
PF3D7_0828900	5	0	1	2154
PF3D7_0829100	2	0	1	2154
PF3D7_0829300	7	0	1	2154
PF3D7_0829400	1	0	1	2154
PF3D7_0830400	2	0	1	2154
PF3D7_0830500	2	0	1	2154
PF3D7_0831700	33	0	1	2154
PF3D7_0901800	2	0	1	2154
PF3D7_0902800	5	0	1	2154
PF3D7_0903200	15	0	1	2154
PF3D7_0903300	2	0	1	2154
PF3D7_0903400	43	0	1	2154
PF3D7_0903700	53	0	1	2154
PF3D7_0903900	11	0	1	2154
PF3D7_0904000	9	0	1	2154
PF3D7_0904100	6	0	1	2154
PF3D7_0904500	7	0	1	2154
PF3D7_0904600	6	0	1	2154
PF3D7_0904700	2	0	1	2154
PF3D7_0905100	2	0	1	2154
PF3D7_0905300	2	0	1	2154
PF3D7_0905900	17	0	1	2154
PF3D7_0906100	6	0	1	2154
PF3D7_0906500	11	0	1	2154
PF3D7_0906910	1	0	1	2154
PF3D7_0907000	6	0	1	2154
PF3D7_0907300	2	0	1	2154
PF3D7_0907400	11	0	1	2154
PF3D7_0907600	8	0	1	2154
PF3D7_0907700	18	0	1	2154
PF3D7_0908000	3	0	1	2154
PF3D7_0909300	4	0	1	2154
PF3D7_0909400	23	0	1	2154
PF3D7_0909600	10	0	1	2154
PF3D7_0909800	8	0	1	2154
PF3D7_0909900	5	0	1	2154
PF3D7_0910900	5	0	1	2154
PF3D7_0911100	1	0	1	2154
PF3D7_0911900	13	0	1	2154
PF3D7_0912100	2	0	1	2154
PF3D7_0912900	24	0	1	2154
PF3D7_0913000	5	0	1	2154
PF3D7_0913200	18	0	1	2154
PF3D7_0913300	3	0	1	2154
PF3D7_0913400	1	0	1	2154
PF3D7_0914100	1	0	1	2154
PF3D7_0914300	3	0	1	2154
PF3D7_0914400	5	0	1	2154
PF3D7_0914700	7	0	1	2154
PF3D7_0915000	1	0	1	2154
PF3D7_0915100	6	0	1	2154
PF3D7_0915900	2	0	1	2154
PF3D7_0916600	1	0	1	2154
PF3D7_0916700	13	0	1	2154
PF3D7_0916800	1	0	1	2154
PF3D7_0917000	7	0	1	2154
PF3D7_0917500	4	0	1	2154
PF3D7_0917600	12	0	1	2154
PF3D7_0918000	8	0	1	2154
PF3D7_0918300	38	0	1	2154
PF3D7_0918600	2	0	1	2154
PF3D7_0918900	28	0	1	2154
PF3D7_0919000	36	0	1	2154
PF3D7_0919800	3	0	1	2154
PF3D7_0919900	6	0	1	2154
PF3D7_0920100	2	0	1	2154
PF3D7_0920400	1	0	1	2154
PF3D7_0920700	4	0	1	2154
PF3D7_0920800	30	0	1	2154
PF3D7_0920900	6	0	1	2154
PF3D7_0921000	8	0	1	2154
PF3D7_0921200	4	0	1	2154
PF3D7_0921600	3	0	1	2154
PF3D7_0921800	3	0	1	2154
PF3D7_0921900	5	0	1	2154
PF3D7_0922400	4	0	1	2154
PF3D7_0922500	117	0	1	2154
PF3D7_0922700	2	0	1	2154
PF3D7_0922800	5	0	1	2154
PF3D7_0923400	2	0	1	2154
PF3D7_0924700	9	0	1	2154
PF3D7_0925700	8	0	1	2154
PF3D7_0927000	2	0	1	2154
PF3D7_0927300	2	0	1	2154
PF3D7_0927600	5	0	1	2154
PF3D7_0928200	4	0	1	2154
PF3D7_0929200	12	0	1	2154
PF3D7_0929700	3	0	1	2154
PF3D7_0930400	3	0	1	2154
PF3D7_0930600	2	0	1	2154
PF3D7_0930800	1	0	1	2154
PF3D7_0930900	2	0	1	2154
PF3D7_0931000	7	0	1	2154
PF3D7_0931100	1	0	1	2154
PF3D7_0931400	11	0	1	2154
PF3D7_0932100	2	0	1	2154
PF3D7_0932200	21	0	1	2154
PF3D7_0933000	3	0	1	2154
PF3D7_0933200	7	0	1	2154
PF3D7_0933500	2	0	1	2154
PF3D7_0933600	9	0	1	2154
PF3D7_0934100	3	0	1	2154
PF3D7_0934700	3	0	1	2154
PF3D7_0934800	14	0	1	2154
PF3D7_0935200	1	0	1	2154
PF3D7_0935900	7	0	1	2154
PF3D7_0936000	1	0	1	2154
PF3D7_0936600	3	0	1	2154
PF3D7_0936800	14	0	1	2154
PF3D7_1001200	4	0	1	2154
PF3D7_1001600	5	0	1	2154
PF3D7_1001700	3	0	1	2154
PF3D7_1002400	8	0	1	2154
PF3D7_1002700	8	0	1	2154
PF3D7_1002800	2	0	1	2154
PF3D7_1002900	1	0	1	2154
PF3D7_1003300	2	0	1	2154
PF3D7_1003500	12	0	1	2154
PF3D7_1004000	14	0	1	2154
PF3D7_1004300	5	0	1	2154
PF3D7_1004400	15	0	1	2154
PF3D7_1004500	7	0	1	2154
PF3D7_1005500	6	0	1	2154
PF3D7_1005600	2	0	1	2154
PF3D7_1006200	17	0	1	2154
PF3D7_1006600	2	0	1	2154
PF3D7_1006700	6	0	1	2154
PF3D7_1006800	12	0	1	2154
PF3D7_1007200	4	0	1	2154
PF3D7_1007700	10	0	1	2154
PF3D7_1007900	37	0	1	2154
PF3D7_1008000	3	0	1	2154
PF3D7_1008100	11	0	1	2154
PF3D7_1008400	32	0	1	2154
PF3D7_1008800	16	0	1	2154
PF3D7_1008900	15	0	1	2154
PF3D7_1009000	3	0	1	2154
PF3D7_1009400	6	0	1	2154
PF3D7_1010100	13	0	1	2154
PF3D7_1010200	4	0	1	2154
PF3D7_1010300	2	0	1	2154
PF3D7_1010600	13	0	1	2154
PF3D7_1010700	11	0	1	2154
PF3D7_1011700	16	0	1	2154
PF3D7_1011800	56	0	1	2154
PF3D7_1012200	2	0	1	2154
PF3D7_1012700	14	0	1	2154
PF3D7_1012900	2	0	1	2154
PF3D7_1013100	6	0	1	2154
PF3D7_1013200	3	0	1	2154
PF3D7_1013600	10	0	1	2154
PF3D7_1014100	1	0	1	2154
PF3D7_1014300	2	0	1	2154
PF3D7_1014400	4	0	1	2154
PF3D7_1014600	12	0	1	2154
PF3D7_1014900	6	0	1	2154
PF3D7_1015300	9	0	1	2154
PF3D7_1015700	1	0	1	2154
PF3D7_1015800	26	0	1	2154
PF3D7_1016200	1	0	1	2154
PF3D7_1016300	11	0	1	2154
PF3D7_1016400	9	0	1	2154
PF3D7_1017000	23	0	1	2154
PF3D7_1017100	4	0	1	2154
PF3D7_1017300	3	0	1	2154
PF3D7_1017400	3	0	1	2154
PF3D7_1018500	2	0	1	2154
PF3D7_1019000	16	0	1	2154
PF3D7_1019400	10	0	1	2154
PF3D7_1019600	1	0	1	2154
PF3D7_1019700	4	0	1	2154
PF3D7_1020700	9	0	1	2154
PF3D7_1020900	16	0	1	2154
PF3D7_1021100	6	0	1	2154
PF3D7_1021400	3	0	1	2154
PF3D7_1021500	5	0	1	2154
PF3D7_1021800	2	0	1	2154
PF3D7_1021900	38	0	1	2154
PF3D7_1022000	2	0	1	2154
PF3D7_1022100	2	0	1	2154
PF3D7_1022400	9	0	1	2154
PF3D7_1022600	2	0	1	2154
PF3D7_1023200	10	0	1	2154
PF3D7_1023900	30	0	1	2154
PF3D7_1024800	7	0	1	2154
PF3D7_1025000	2	0	1	2154
PF3D7_1025300	5	0	1	2154
PF3D7_1025600	1	0	1	2154
PF3D7_1026000	4	0	1	2154
PF3D7_1026800	54	0	1	2154
PF3D7_1027100	3	0	1	2154
PF3D7_1027400	4	0	1	2154
PF3D7_1027700	6	0	1	2154
PF3D7_1028000	5	0	1	2154
PF3D7_1028500	1	0	1	2154
PF3D7_1028600	4	0	1	2154
PF3D7_1028700	2	0	1	2154
PF3D7_1029200	4	0	1	2154
PF3D7_1029900	4	0	1	2154
PF3D7_1030000	5	0	1	2154
PF3D7_1030100	17	0	1	2154
PF3D7_1030500	20	0	1	2154
PF3D7_1030600	7	0	1	2154
PF3D7_1030800	1	0	1	2154
PF3D7_1031300	2	0	1	2154
PF3D7_1031600	11	0	1	2154
PF3D7_1031700	1	0	1	2154
PF3D7_1031900	1	0	1	2154
PF3D7_1032100	4	0	1	2154
PF3D7_1032800	12	0	1	2154
PF3D7_1032900	2	0	1	2154
PF3D7_1033200	15	0	1	2154
PF3D7_1033300	1	0	1	2154
PF3D7_1033400	27	0	1	2154
PF3D7_1033500	4	0	1	2154
PF3D7_1033600	7	0	1	2154
PF3D7_1033700	17	0	1	2154
PF3D7_1033900	4	0	1	2154
PF3D7_1034000	3	0	1	2154
PF3D7_1035300	17	0	1	2154
PF3D7_1035900	4	0	1	2154
PF3D7_1036700	1	0	1	2154
PF3D7_1036900	18	0	1	2154
PF3D7_1037100	8	0	1	2154
PF3D7_1037500	8	0	1	2154
PF3D7_1038000	2	0	1	2154
PF3D7_1038100	2	0	1	2154
PF3D7_1039100	1	0	1	2154
PF3D7_1101700	5	0	1	2154
PF3D7_1102400	1	0	1	2154
PF3D7_1102500	3	0	1	2154
PF3D7_1103600	8	0	1	2154
PF3D7_1103700	19	0	1	2154
PF3D7_1103800	20	0	1	2154
PF3D7_1104000	31	0	1	2154
PF3D7_1104200	24	0	1	2154
PF3D7_1104700	3	0	1	2154
PF3D7_1105000	6	0	1	2154
PF3D7_1105100	12	0	1	2154
PF3D7_1105300	1	0	1	2154
PF3D7_1105400	33	0	1	2154
PF3D7_1105600	16	0	1	2154
PF3D7_1105700	8	0	1	2154
PF3D7_1105800	6	0	1	2154
PF3D7_1106000	25	0	1	2154
PF3D7_1106700	4	0	1	2154
PF3D7_1107200	4	0	1	2154
PF3D7_1107400	8	0	1	2154
PF3D7_1107500	4	0	1	2154
PF3D7_1107700	5	0	1	2154
PF3D7_1107800	11	0	1	2154
PF3D7_1108000	5	0	1	2154
PF3D7_1108200	4	0	1	2154
PF3D7_1108400	25	0	1	2154
PF3D7_1108500	6	0	1	2154
PF3D7_1108600	44	0	1	2154
PF3D7_1109900	5	0	1	2154
PF3D7_1110200	3	0	1	2154
PF3D7_1110400	20	0	1	2154
PF3D7_1110700	9	0	1	2154
PF3D7_1111000	1	0	1	2154
PF3D7_1111100	14	0	1	2154
PF3D7_1111200	2	0	1	2154
PF3D7_1111500	5	0	1	2154
PF3D7_1111900	3	0	1	2154
PF3D7_1112500	8	0	1	2154
PF3D7_1113700	16	0	1	2154
PF3D7_1114200	4	0	1	2154
PF3D7_1115400	32	0	1	2154
PF3D7_1115600	21	0	1	2154
PF3D7_1116000	13	0	1	2154
PF3D7_1116200	12	0	1	2154
PF3D7_1116300	2	0	1	2154
PF3D7_1116500	2	0	1	2154
PF3D7_1116700	42	0	1	2154
PF3D7_1116800	17	0	1	2154
PF3D7_1117100	24	0	1	2154
PF3D7_1117300	3	0	1	2154
PF3D7_1118000	3	0	1	2154
PF3D7_1118100	3	0	1	2154
PF3D7_1118200	17	0	1	2154
PF3D7_1119000	4	0	1	2154
PF3D7_1119300	4	0	1	2154
PF3D7_1119400	4	0	1	2154
PF3D7_1119800	3	0	1	2154
PF3D7_1119900	3	0	1	2154
PF3D7_1120000	32	0	1	2154
PF3D7_1120100	43	0	1	2154
PF3D7_1121100	14	0	1	2154
PF3D7_1121700	4	0	1	2154
PF3D7_1122200	1	0	1	2154
PF3D7_1122400	4	0	1	2154
PF3D7_1122500	3	0	1	2154
PF3D7_1123400	27	0	1	2154
PF3D7_1123500	14	0	1	2154
PF3D7_1123900	12	0	1	2154
PF3D7_1124000	2	0	1	2154
PF3D7_1124300	9	0	1	2154
PF3D7_1124400	3	0	1	2154
PF3D7_1124700	11	0	1	2154
PF3D7_1124800	6	0	1	2154
PF3D7_1125400	1	0	1	2154
PF3D7_1125500	5	0	1	2154
PF3D7_1126000	52	0	1	2154
PF3D7_1126100	1	0	1	2154
PF3D7_1126200	26	0	1	2154
PF3D7_1126500	6	0	1	2154
PF3D7_1127000	8	0	1	2154
PF3D7_1127600	10	0	1	2154
PF3D7_1127800	2	0	1	2154
PF3D7_1128000	10	0	1	2154
PF3D7_1128100	13	0	1	2154
PF3D7_1128200	6	0	1	2154
PF3D7_1128400	15	0	1	2154
PF3D7_1129000	6	0	1	2154
PF3D7_1129200	21	0	1	2154
PF3D7_1129400	8	0	1	2154
PF3D7_1129800	3	0	1	2154
PF3D7_1129900	6	0	1	2154
PF3D7_1130100	11	0	1	2154
PF3D7_1130200	43	0	1	2154
PF3D7_1130400	47	0	1	2154
PF3D7_1130500	4	0	1	2154
PF3D7_1130700	16	0	1	2154
PF3D7_1132000	2	0	1	2154
PF3D7_1132300	12	0	1	2154
PF3D7_1132600	3	0	1	2154
PF3D7_1133100	2	0	1	2154
PF3D7_1133200	9	0	1	2154
PF3D7_1133400	2	0	1	2154
PF3D7_1133800	9	0	1	2154
PF3D7_1133900	3	0	1	2154
PF3D7_1134000	47	0	1	2154
PF3D7_1134200	6	0	1	2154
PF3D7_1134300	3	0	1	2154
PF3D7_1134600	2	0	1	2154
PF3D7_1134700	3	0	1	2154
PF3D7_1134800	15	0	1	2154
PF3D7_1134900	1	0	1	2154
PF3D7_1135100	5	0	1	2154
PF3D7_1135400	8	0	1	2154
PF3D7_1136300	32	0	1	2154
PF3D7_1136500	16	0	1	2154
PF3D7_1136600	4	0	1	2154
PF3D7_1136800	3	0	1	2154
PF3D7_1137300	1	0	1	2154
PF3D7_1138000	5	0	1	2154
PF3D7_1138100	3	0	1	2154
PF3D7_1138500	23	0	1	2154
PF3D7_1138800	4	0	1	2154
PF3D7_1139300	1	0	1	2154
PF3D7_1140100	9	0	1	2154
PF3D7_1140200	11	0	1	2154
PF3D7_1140400	3	0	1	2154
PF3D7_1140800	5	0	1	2154
PF3D7_1141300	8	0	1	2154
PF3D7_1141700	8	0	1	2154
PF3D7_1142100	9	0	1	2154
PF3D7_1142500	8	0	1	2154
PF3D7_1142600	7	0	1	2154
PF3D7_1142700	6	0	1	2154
PF3D7_1143300	10	0	1	2154
PF3D7_1143400	5	0	1	2154
PF3D7_1144000	5	0	1	2154
PF3D7_1144500	6	0	1	2154
PF3D7_1144600	2	0	1	2154
PF3D7_1145100	19	0	1	2154
PF3D7_1145400	34	0	1	2154
PF3D7_1146000	13	0	1	2154
PF3D7_1147300	9	0	1	2154
PF3D7_1147900	3	0	1	2154
PF3D7_1148000	3	0	1	2154
PF3D7_1149200	7	0	1	2154
PF3D7_1149400	4	0	1	2154
PF3D7_1200700	3	0	1	2154
PF3D7_1201000	16	0	1	2154
PF3D7_1201500	4	0	1	2154
PF3D7_1201900	1	0	1	2154
PF3D7_1202100	7	0	1	2154
PF3D7_1202600	8	0	1	2154
PF3D7_1202900	2	0	1	2154
PF3D7_1203500	8	0	1	2154
PF3D7_1203700	42	0	1	2154
PF3D7_1203900	15	0	1	2154
PF3D7_1204300	24	0	1	2154
PF3D7_1205100	5	0	1	2154
PF3D7_1205500	3	0	1	2154
PF3D7_1205600	16	0	1	2154
PF3D7_1205700	2	0	1	2154
PF3D7_1205800	4	0	1	2154
PF3D7_1205900	3	0	1	2154
PF3D7_1206000	2	0	1	2154
PF3D7_1206200	41	0	1	2154
PF3D7_1206600	2	0	1	2154
PF3D7_1206800	15	0	1	2154
PF3D7_1207000	8	0	1	2154
PF3D7_1208100	7	0	1	2154
PF3D7_1208200	1	0	1	2154
PF3D7_1208300	5	0	1	2154
PF3D7_1208600	1	0	1	2154
PF3D7_1208900	13	0	1	2154
PF3D7_1209000	2	0	1	2154
PF3D7_1209300	1	0	1	2154
PF3D7_1210100	6	0	1	2154
PF3D7_1210300	9	0	1	2154
PF3D7_1210600	4	0	1	2154
PF3D7_1211200	2	0	1	2154
PF3D7_1211300	2	0	1	2154
PF3D7_1211400	11	0	1	2154
PF3D7_1211700	31	0	1	2154
PF3D7_1211800	17	0	1	2154
PF3D7_1212000	8	0	1	2154
PF3D7_1212400	2	0	1	2154
PF3D7_1212500	5	0	1	2154
PF3D7_1212900	11	0	1	2154
PF3D7_1213200	4	0	1	2154
PF3D7_1213600	2	0	1	2154
PF3D7_1213700	5	0	1	2154
PF3D7_1213900	18	0	1	2154
PF3D7_1215000	3	0	1	2154
PF3D7_1215100	1	0	1	2154
PF3D7_1215400	3	0	1	2154
PF3D7_1216200	34	0	1	2154
PF3D7_1216300	6	0	1	2154
PF3D7_1217200	2	0	1	2154
PF3D7_1217900	9	0	1	2154
PF3D7_1218200	11	0	1	2154
PF3D7_1218300	2	0	1	2154
PF3D7_1218500	26	0	1	2154
PF3D7_1218600	26	0	1	2154
PF3D7_1218900	4	0	1	2154
PF3D7_1219000	3	0	1	2154
PF3D7_1219100	92	0	1	2154
PF3D7_1219600	7	0	1	2154
PF3D7_1220100	2	0	1	2154
PF3D7_1220900	23	0	1	2154
PF3D7_1221000	10	0	1	2154
PF3D7_1222100	4	0	1	2154
PF3D7_1222500	3	0	1	2154
PF3D7_1222700	1	0	1	2154
PF3D7_1223100	27	0	1	2154
PF3D7_1223200	2	0	1	2154
PF3D7_1223400	3	0	1	2154
PF3D7_1223600	1	0	1	2154
PF3D7_1223700	2	0	1	2154
PF3D7_1224000	26	0	1	2154
PF3D7_1224100	2	0	1	2154
PF3D7_1224900	1	0	1	2154
PF3D7_1225200	13	0	1	2154
PF3D7_1225600	5	0	1	2154
PF3D7_1225700	7	0	1	2154
PF3D7_1225800	57	0	1	2154
PF3D7_1226400	7	0	1	2154
PF3D7_1226800	3	0	1	2154
PF3D7_1226900	6	0	1	2154
PF3D7_1227100	3	0	1	2154
PF3D7_1227600	3	0	1	2154
PF3D7_1227800	3	0	1	2154
PF3D7_1228300	1	0	1	2154
PF3D7_1228400	1	0	1	2154
PF3D7_1228600	46	0	1	2154
PF3D7_1228800	2	0	1	2154
PF3D7_1229300	5	0	1	2154
PF3D7_1230500	4	0	1	2154
PF3D7_1230700	13	0	1	2154
PF3D7_1230900	3	0	1	2154
PF3D7_1231100	15	0	1	2154
PF3D7_1231500	5	0	1	2154
PF3D7_1231800	8	0	1	2154
PF3D7_1231900	1	0	1	2154
PF3D7_1232100	14	0	1	2154
PF3D7_1232200	10	0	1	2154
PF3D7_1233600	18	0	1	2154
PF3D7_1234100	4	0	1	2154
PF3D7_1234300	2	0	1	2154
PF3D7_1234500	4	0	1	2154
PF3D7_1234900	2	0	1	2154
PF3D7_1235300	6	0	1	2154
PF3D7_1235500	5	0	1	2154
PF3D7_1235600	46	0	1	2154
PF3D7_1235700	8	0	1	2154
PF3D7_1235900	1	0	1	2154
PF3D7_1236100	12	0	1	2154
PF3D7_1236300	1	0	1	2154
PF3D7_1236400	1	0	1	2154
PF3D7_1237100	1	0	1	2154
PF3D7_1237200	18	0	1	2154
PF3D7_1237400	10	0	1	2154
PF3D7_1237500	4	0	1	2154
PF3D7_1237600	4	0	1	2154
PF3D7_1237700	6	0	1	2154
PF3D7_1237800	1	0	1	2154
PF3D7_1238100	14	0	1	2154
PF3D7_1238300	3	0	1	2154
PF3D7_1238500	7	0	1	2154
PF3D7_1239200	18	0	1	2154
PF3D7_1239700	10	0	1	2154
PF3D7_1239800	22	0	1	2154
PF3D7_1241500	1	0	1	2154
PF3D7_1241700	6	0	1	2154
PF3D7_1241900	5	0	1	2154
PF3D7_1242000	1	0	1	2154
PF3D7_1242100	1	0	1	2154
PF3D7_1242600	1	0	1	2154
PF3D7_1242800	39	0	1	2154
PF3D7_1243100	1	0	1	2154
PF3D7_1243500	4	0	1	2154
PF3D7_1243600	13	0	1	2154
PF3D7_1244200	4	0	1	2154
PF3D7_1244600	9	0	1	2154
PF3D7_1244800	10	0	1	2154
PF3D7_1245100	3	0	1	2154
PF3D7_1245300	3	0	1	2154
PF3D7_1245900	5	0	1	2154
PF3D7_1246200	28	0	1	2154
PF3D7_1246800	2	0	1	2154
PF3D7_1247100	1	0	1	2154
PF3D7_1247200	1	0	1	2154
PF3D7_1248000	1	0	1	2154
PF3D7_1248200	4	0	1	2154
PF3D7_1248900	15	0	1	2154
PF3D7_1249100	16	0	1	2154
PF3D7_1249300	7	0	1	2154
PF3D7_1249500	6	0	1	2154
PF3D7_1249800	13	0	1	2154
PF3D7_1250600	2	0	1	2154
PF3D7_1250700	4	0	1	2154
PF3D7_1251200	7	0	1	2154
PF3D7_1251300	5	0	1	2154
PF3D7_1251500	4	0	1	2154
PF3D7_1252300	4	0	1	2154
PF3D7_1253000	5	0	1	2154
PF3D7_1253400	7	0	1	2154
PF3D7_1301700	3	0	1	2154
PF3D7_1302000	2	0	1	2154
PF3D7_1302500	2	0	1	2154
PF3D7_1302800	30	0	1	2154
PF3D7_1303400	1	0	1	2154
PF3D7_1303800	2	0	1	2154
PF3D7_1304000	6	0	1	2154
PF3D7_1304100	13	0	1	2154
PF3D7_1304400	6	0	1	2154
PF3D7_1304500	16	0	1	2154
PF3D7_1304700	1	0	1	2154
PF3D7_1304900	7	0	1	2154
PF3D7_1305000	5	0	1	2154
PF3D7_1305300	18	0	1	2154
PF3D7_1305400	4	0	1	2154
PF3D7_1305900	2	0	1	2154
PF3D7_1306200	2	0	1	2154
PF3D7_1306400	28	0	1	2154
PF3D7_1306600	8	0	1	2154
PF3D7_1306700	2	0	1	2154
PF3D7_1306800	3	0	1	2154
PF3D7_1306900	4	0	1	2154
PF3D7_1307000	1	0	1	2154
PF3D7_1307200	4	0	1	2154
PF3D7_1307700	6	0	1	2154
PF3D7_1307900	3	0	1	2154
PF3D7_1308300	16	0	1	2154
PF3D7_1308400	5	0	1	2154
PF3D7_1308900	2	0	1	2154
PF3D7_1309100	5	0	1	2154
PF3D7_1309200	2	0	1	2154
PF3D7_1309300	4	0	1	2154
PF3D7_1309400	2	0	1	2154
PF3D7_1309500	3	0	1	2154
PF3D7_1309700	1	0	1	2154
PF3D7_1310300	3	0	1	2154
PF3D7_1310400	2	0	1	2154
PF3D7_1310500	3	0	1	2154
PF3D7_1310800	9	0	1	2154
PF3D7_1311200	2	0	1	2154
PF3D7_1311900	50	0	1	2154
PF3D7_1312600	2	0	1	2154
PF3D7_1312700	9	0	1	2154
PF3D7_1312900	16	0	1	2154
PF3D7_1313000	1	0	1	2154
PF3D7_1313700	3	0	1	2154
PF3D7_1313800	2	0	1	2154
PF3D7_1314100	9	0	1	2154
PF3D7_1314500	3	0	1	2154
PF3D7_1314900	3	0	1	2154
PF3D7_1315300	3	0	1	2154
PF3D7_1315500	1	0	1	2154
PF3D7_1315700	5	0	1	2154
PF3D7_1316800	1	0	1	2154
PF3D7_1317000	7	0	1	2154
PF3D7_1317100	32	0	1	2154
PF3D7_1317200	1	0	1	2154
PF3D7_1317400	3	0	1	2154
PF3D7_1317700	3	0	1	2154
PF3D7_1317800	14	0	1	2154
PF3D7_1317900	1	0	1	2154
PF3D7_1318300	1	0	1	2154
PF3D7_1318400	19	0	1	2154
PF3D7_1318800	4	0	1	2154
PF3D7_1319300	12	0	1	2154
PF3D7_1319400	5	0	1	2154
PF3D7_1320000	11	0	1	2154
PF3D7_1320800	3	0	1	2154
PF3D7_1320900	3	0	1	2154
PF3D7_1321700	8	0	1	2154
PF3D7_1321900	6	0	1	2154
PF3D7_1322000	9	0	1	2154
PF3D7_1322200	24	0	1	2154
PF3D7_1323100	23	0	1	2154
PF3D7_1323200	8	0	1	2154
PF3D7_1323300	1	0	1	2154
PF3D7_1323400	6	0	1	2154
PF3D7_1323500	5	0	1	2154
PF3D7_1323600	6	0	1	2154
PF3D7_1323800	1	0	1	2154
PF3D7_1323900	2	0	1	2154
PF3D7_1324200	2	0	1	2154
PF3D7_1324400	2	0	1	2154
PF3D7_1324500	4	0	1	2154
PF3D7_1324700	4	0	1	2154
PF3D7_1324800	14	0	1	2154
PF3D7_1325100	18	0	1	2154
PF3D7_1325400	7	0	1	2154
PF3D7_1326200	1	0	1	2154
PF3D7_1326300	9	0	1	2154
PF3D7_1326400	10	0	1	2154
PF3D7_1327300	2	0	1	2154
PF3D7_1327400	1	0	1	2154
PF3D7_1327600	1	0	1	2154
PF3D7_1327800	7	0	1	2154
PF3D7_1328500	8	0	1	2154
PF3D7_1328900	5	0	1	2154
PF3D7_1329000	7	0	1	2154
PF3D7_1329100	17	0	1	2154
PF3D7_1329300	7	0	1	2154
PF3D7_1329500	2	0	1	2154
PF3D7_1329600	1	0	1	2154
PF3D7_1330000	5	0	1	2154
PF3D7_1330400	3	0	1	2154
PF3D7_1330600	5	0	1	2154
PF3D7_1330800	15	0	1	2154
PF3D7_1331300	3	0	1	2154
PF3D7_1331700	38	0	1	2154
PF3D7_1331800	13	0	1	2154
PF3D7_1332000	7	0	1	2154
PF3D7_1332300	3	0	1	2154
PF3D7_1332400	1	0	1	2154
PF3D7_1332500	3	0	1	2154
PF3D7_1332600	7	0	1	2154
PF3D7_1333000	9	0	1	2154
PF3D7_1333400	12	0	1	2154
PF3D7_1333600	2	0	1	2154
PF3D7_1333800	7	0	1	2154
PF3D7_1334100	3	0	1	2154
PF3D7_1334200	12	0	1	2154
PF3D7_1334800	8	0	1	2154
PF3D7_1335100	24	0	1	2154
PF3D7_1335300	9	0	1	2154
PF3D7_1335700	2	0	1	2154
PF3D7_1336800	10	0	1	2154
PF3D7_1336900	16	0	1	2154
PF3D7_1337200	4	0	1	2154
PF3D7_1337300	3	0	1	2154
PF3D7_1338200	25	0	1	2154
PF3D7_1339700	3	0	1	2154
PF3D7_1340300	5	0	1	2154
PF3D7_1340700	2	0	1	2154
PF3D7_1341200	13	0	1	2154
PF3D7_1341300	14	0	1	2154
PF3D7_1341900	8	0	1	2154
PF3D7_1342000	19	0	1	2154
PF3D7_1342100	5	0	1	2154
PF3D7_1342600	4	0	1	2154
PF3D7_1343000	52	0	1	2154
PF3D7_1343300	10	0	1	2154
PF3D7_1343600	2	0	1	2154
PF3D7_1344200	60	0	1	2154
PF3D7_1344300	3	0	1	2154
PF3D7_1344700	1	0	1	2154
PF3D7_1344900	2	0	1	2154
PF3D7_1345100	5	0	1	2154
PF3D7_1345400	5	0	1	2154
PF3D7_1345700	11	0	1	2154
PF3D7_1345900	7	0	1	2154
PF3D7_1346100	5	0	1	2154
PF3D7_1346300	18	0	1	2154
PF3D7_1346400	8	0	1	2154
PF3D7_1346500	3	0	1	2154
PF3D7_1347200	9	0	1	2154
PF3D7_1347500	37	0	1	2154
PF3D7_1347700	9	0	1	2154
PF3D7_1348300	2	0	1	2154
PF3D7_1348400	2	0	1	2154
PF3D7_1348500	6	0	1	2154
PF3D7_1349100	3	0	1	2154
PF3D7_1349300	1	0	1	2154
PF3D7_1349600	2	0	1	2154
PF3D7_1349800	1	0	1	2154
PF3D7_1350500	2	0	1	2154
PF3D7_1351400	9	0	1	2154
PF3D7_1351700	3	0	1	2154
PF3D7_1351800	7	0	1	2154
PF3D7_1352200	5	0	1	2154
PF3D7_1352700	13	0	1	2154
PF3D7_1352800	4	0	1	2154
PF3D7_1353200	4	0	1	2154
PF3D7_1353400	5	0	1	2154
PF3D7_1354300	9	0	1	2154
PF3D7_1354500	35	0	1	2154
PF3D7_1354600	2	0	1	2154
PF3D7_1355300	3	0	1	2154
PF3D7_1355700	3	0	1	2154
PF3D7_1355800	1	0	1	2154
PF3D7_1356100	4	0	1	2154
PF3D7_1356300	10	0	1	2154
PF3D7_1356800	2	0	1	2154
PF3D7_1356900	1	0	1	2154
PF3D7_1357500	2	0	1	2154
PF3D7_1357700	3	0	1	2154
PF3D7_1358100	4	0	1	2154
PF3D7_1358200	3	0	1	2154
PF3D7_1358500	7	0	1	2154
PF3D7_1358900	17	0	1	2154
PF3D7_1359000	4	0	1	2154
PF3D7_1359100	1	0	1	2154
PF3D7_1359300	5	0	1	2154
PF3D7_1359400	20	0	1	2154
PF3D7_1359600	8	0	1	2154
PF3D7_1360100	2	0	1	2154
PF3D7_1360400	5	0	1	2154
PF3D7_1360900	14	0	1	2154
PF3D7_1361000	4	0	1	2154
PF3D7_1361200	2	0	1	2154
PF3D7_1361600	1	0	1	2154
PF3D7_1362200	21	0	1	2154
PF3D7_1363100	2	0	1	2154
PF3D7_1363200	2	0	1	2154
PF3D7_1363400	19	0	1	2154
PF3D7_1364000	1	0	1	2154
PF3D7_1364100	25	0	1	2154
PF3D7_1364500	7	0	1	2154
PF3D7_1365500	5	0	1	2154
PF3D7_1365700	1	0	1	2154
PF3D7_1366000	1	0	1	2154
PF3D7_1366300	13	0	1	2154
PF3D7_1366400	4	0	1	2154
PF3D7_1366600	4	0	1	2154
PF3D7_1366900	15	0	1	2154
PF3D7_1367000	23	0	1	2154
PF3D7_1367100	5	0	1	2154
PF3D7_1367400	1	0	1	2154
PF3D7_1367700	36	0	1	2154
PF3D7_1368100	22	0	1	2154
PF3D7_1368300	2	0	1	2154
PF3D7_1368400	2	0	1	2154
PF3D7_1368600	2	0	1	2154
PF3D7_1368900	6	0	1	2154
PF3D7_1369400	6	0	1	2154
PF3D7_1369500	28	0	1	2154
PF3D7_1370300	8	0	1	2154
PF3D7_1401100	1	0	1	2154
PF3D7_1401600	5	0	1	2154
PF3D7_1402000	6	0	1	2154
PF3D7_1402500	4	0	1	2154
PF3D7_1402700	4	0	1	2154
PF3D7_1403100	6	0	1	2154
PF3D7_1403900	4	0	1	2154
PF3D7_1404000	2	0	1	2154
PF3D7_1404100	7	0	1	2154
PF3D7_1404900	20	0	1	2154
PF3D7_1405500	1	0	1	2154
PF3D7_1405900	6	0	1	2154
PF3D7_1406000	3	0	1	2154
PF3D7_1406100	1	0	1	2154
PF3D7_1406200	29	0	1	2154
PF3D7_1406300	14	0	1	2154
PF3D7_1406700	6	0	1	2154
PF3D7_1406800	1	0	1	2154
PF3D7_1407100	17	0	1	2154
PF3D7_1408400	3	0	1	2154
PF3D7_1408500	2	0	1	2154
PF3D7_1408600	29	0	1	2154
PF3D7_1408700	15	0	1	2154
PF3D7_1408900	3	0	1	2154
PF3D7_1409000	4	0	1	2154
PF3D7_1409300	12	0	1	2154
PF3D7_1409600	1	0	1	2154
PF3D7_1409800	21	0	1	2154
PF3D7_1410200	34	0	1	2154
PF3D7_1410300	5	0	1	2154
PF3D7_1410700	8	0	1	2154
PF3D7_1411200	1	0	1	2154
PF3D7_1411300	3	0	1	2154
PF3D7_1412100	20	0	1	2154
PF3D7_1412500	20	0	1	2154
PF3D7_1412700	5	0	1	2154
PF3D7_1412800	5	0	1	2154
PF3D7_1412900	3	0	1	2154
PF3D7_1414000	11	0	1	2154
PF3D7_1414300	5	0	1	2154
PF3D7_1414600	3	0	1	2154
PF3D7_1415000	4	0	1	2154
PF3D7_1415200	4	0	1	2154
PF3D7_1415300	8	0	1	2154
PF3D7_1415400	1	0	1	2154
PF3D7_1415800	2	0	1	2154
PF3D7_1416100	2	0	1	2154
PF3D7_1416500	32	0	1	2154
PF3D7_1416900	8	0	1	2154
PF3D7_1417200	16	0	1	2154
PF3D7_1417500	16	0	1	2154
PF3D7_1417600	6	0	1	2154
PF3D7_1417700	8	0	1	2154
PF3D7_1418200	1	0	1	2154
PF3D7_1419000	6	0	1	2154
PF3D7_1419300	14	0	1	2154
PF3D7_1419400	8	0	1	2154
PF3D7_1419700	23	0	1	2154
PF3D7_1420000	2	0	1	2154
PF3D7_1420200	4	0	1	2154
PF3D7_1420600	11	0	1	2154
PF3D7_1420900	1	0	1	2154
PF3D7_1421200	5	0	1	2154
PF3D7_1421400	1	0	1	2154
PF3D7_1421900	1	0	1	2154
PF3D7_1422600	3	0	1	2154
PF3D7_1422700	3	0	1	2154
PF3D7_1422800	5	0	1	2154
PF3D7_1423200	5	0	1	2154
PF3D7_1423300	3	0	1	2154
PF3D7_1423700	18	0	1	2154
PF3D7_1424100	23	0	1	2154
PF3D7_1424400	21	0	1	2154
PF3D7_1425700	3	0	1	2154
PF3D7_1425900	7	0	1	2154
PF3D7_1426000	10	0	1	2154
PF3D7_1426100	11	0	1	2154
PF3D7_1426200	17	0	1	2154
PF3D7_1426800	5	0	1	2154
PF3D7_1427300	12	0	1	2154
PF3D7_1427500	17	0	1	2154
PF3D7_1427900	40	0	1	2154
PF3D7_1428800	3	0	1	2154
PF3D7_1429400	2	0	1	2154
PF3D7_1429500	3	0	1	2154
PF3D7_1429800	25	0	1	2154
PF3D7_1429900	1	0	1	2154
PF3D7_1430100	4	0	1	2154
PF3D7_1430300	6	0	1	2154
PF3D7_1431300	3	0	1	2154
PF3D7_1432000	1	0	1	2154
PF3D7_1432100	4	0	1	2154
PF3D7_1432500	1	0	1	2154
PF3D7_1432700	3	0	1	2154
PF3D7_1432800	4	0	1	2154
PF3D7_1433000	1	0	1	2154
PF3D7_1433100	1	0	1	2154
PF3D7_1433300	6	0	1	2154
PF3D7_1433500	9	0	1	2154
PF3D7_1434000	1	0	1	2154
PF3D7_1434100	11	0	1	2154
PF3D7_1434300	59	0	1	2154
PF3D7_1434500	8	0	1	2154
PF3D7_1434800	12	0	1	2154
PF3D7_1435100	1	0	1	2154
PF3D7_1435400	1	0	1	2154
PF3D7_1435500	3	0	1	2154
PF3D7_1435600	4	0	1	2154
PF3D7_1435700	4	0	1	2154
PF3D7_1436600	12	0	1	2154
PF3D7_1436900	1	0	1	2154
PF3D7_1437400	13	0	1	2154
PF3D7_1437700	4	0	1	2154
[truncated: 156 more rows]

## Sheet: Data S4 Fisher Exact Exp 2
Data S4. Related to Fig. 4. Experiment 2 LiP-MS Fisher Exact P-values
Gene_id	Total	LipMS significant	Fisher exact pvalue	corrected pvalue
PF3D7_1311800	122	16	3.7e-15	7.38e-12
P30043	19	3	0.000386616	0.771
PF3D7_1424100	20	3	0.000442414	0.882
PF3D7_0619400	70	4	0.00145074	2.89
P69905	84	4	0.00273179	5.45
PF3D7_0912900	15	2	0.00534902	10.7
PF3D7_0422400	28	2	0.0161717	32.2
PF3D7_1252300	2	1	0.0192268	38.3
PF3D7_0827900	90	3	0.0230397	45.9
PF3D7_1202900	4	1	0.031837	63.5
P04040	47	2	0.040296	80.4
PF3D7_1138500	6	1	0.0442836	88.3
PF3D7_1244600	6	1	0.0442836	88.3
PF3D7_0316800	7	1	0.0504462	101
PF3D7_0501600	7	1	0.0504462	101
PF3D7_1308400	7	1	0.0504462	101
PF3D7_1408000	59	2	0.0595877	119
PF3D7_0532300	9	1	0.0626513	125
PF3D7_0817500	10	1	0.0686944	137
PF3D7_1016300	10	1	0.0686944	137
PF3D7_0618300	11	1	0.0746982	149
PF3D7_1215300	11	1	0.0746982	149
PF3D7_1015900	69	2	0.0775718	155
PF3D7_1357000	70	2	0.0794533	158
PF3D7_1006800	13	1	0.0865888	173
PF3D7_1359400	13	1	0.0865888	173
A0A087WWU8;Q5HYB6	16	1	0.104136	208
PF3D7_1124600	16	1	0.104136	208
PF3D7_0915400	85	2	0.109216	218
PF3D7_0728000	17	1	0.109909	219
PF3D7_1105600	17	1	0.109909	219
PF3D7_0520000	18	1	0.115645	231
PF3D7_1419700	18	1	0.115645	231
P16157	90	2	0.119694	239
PF3D7_0612100	19	1	0.121343	242
PF3D7_1454400	92	2	0.123951	247
PF3D7_0826700	20	1	0.127005	253
P00915	22	1	0.138217	276
PF3D7_1105400	22	1	0.138217	276
PF3D7_1446200	24	1	0.149284	298
PF3D7_1343000	24	1	0.149284	298
PF3D7_0903700	25	1	0.154764	309
P02730	27	1	0.165617	330
PF3D7_0818200	29	1	0.176329	352
P35611	30	1	0.181633	362
C9JIF9;P13798	32	1	0.192137	383
PF3D7_0818900	128	2	0.205191	409
P68871	36	1	0.21274	424
PF3D7_0621200	36	1	0.21274	424
PF3D7_1206200	37	1	0.217807	434
PF3D7_1012400	38	1	0.222841	444
PF3D7_0925900	41	1	0.237749	474
PF3D7_1212700	41	1	0.237749	474
PF3D7_1134000	43	1	0.247527	494
PF3D7_1029600	45	1	0.257178	513
PF3D7_1444800	47	1	0.266705	532
PF3D7_1344200	49	1	0.276108	551
PF3D7_0922500	53	1	0.294551	587
PF3D7_1108600	61	1	0.330026	658
PF3D7_0500800	62	1	0.334332	667
PF3D7_0207600	68	1	0.359587	717
PF3D7_1149000	203	2	0.380786	759
PF3D7_0708400	75	1	0.387833	773
PF3D7_1324900	76	1	0.391764	781
P02549	77	1	0.39567	789
PF3D7_0626800	81	1	0.411041	820
PF3D7_1222300	98	1	0.472089	941
PF3D7_0917900	120	1	0.541722	1080
PF3D7_0930300	184	1	0.695998	1390
PF3D7_0932300	12	0	1	1990
PF3D7_1229400	8	0	1	1990
A0A087WSW9;A0A087WSY9;A0A182DWI3;F8W809;Q16881	10	0	1	1990
A0A024RA52;P25787	4	0	1	1990
A0A075B7C0;A0A0C4DGQ5;K7EIV0;K7EKD8;K7ELJ7;P04632;U3KPR7;U3KQE2	2	0	1	1990
A0A087WT99;A0A1W2PRB8;E9PQS1;Q9H0W9	2	0	1	1990
A0A087WUQ6;P07203	9	0	1	1990
A0A087WVQ6;Q00610	14	0	1	1990
A0A087WVQ9;P68104;Q5VTE0	1	0	1	1990
A0A087WW66;Q99460	4	0	1	1990
A0A087WXG3;Q8NDY6;Q8NFJ8	1	0	1	1990
A0A087WY55;Q9NP79	1	0	1	1990
A0A087WYS1;C9JNZ1;C9JQU9;C9JTZ5;C9JUW1;C9JVG3;C9JWG0;E7EUC7;Q16851	1	0	1	1990
A0A087WZZ4;A0A0A0MQS8;Q02094	7	0	1	1990
A0A087X0A8;D6RGG3;H0Y4P7;Q99715	1	0	1	1990
A0A087X0E3;A0A0A0MS59;A0A0A0MT49;A0A0C4DFX4;A0A0U1RQE1;A0A0U1RQZ9;F6VDE0;P51531;P51532;Q6ZRS2;Q9H4L7;Q9HBD4	1	0	1	1990
A0A087X0I0;A0A140T8Y3;A0A140T8Z8;A0A140T902;A0A140T9C0;A0A140T9L7;A0A140TA33;A0A140TA41;A0A140TA52;P22105	2	0	1	1990
A0A087X0K1;Q9Y376	1	0	1	1990
A0A087X253;P63010	2	0	1	1990
A0A087X2I1;P62333	9	0	1	1990
A0A096LNY4;A0A1B0GTG9;A0A1B0GTJ7;A0A1B0GWF8;A0A1B0GWJ0;P30566	1	0	1	1990
A0A0A0MRA3;A0A0A0MTS7;Q8WZ42	2	0	1	1990
A0A0A0MSJ3;E9PFK9;Q3HKR1;Q9UJ41	1	0	1	1990
A0A0A0MTS2;P06744	2	0	1	1990
A0A0B4J1R6;P29401	1	0	1	1990
A0A0B4J296;B8ZZU8;I3L0M9;Q15370	1	0	1	1990
A0A0C4DG71;A0A0G2JQM2;A0A0G2JR20;A0A0G2JR50;Q86SQ7	1	0	1	1990
A0A0C4DGB6;B7WNR0;D6RHD5;H0YA55;P02768	11	0	1	1990
A0A0C4DGU9;Q9NTJ4	1	0	1	1990
A0A0G2JH68;A0A140T8Z0;H9KV28;O60610	1	0	1	1990
A0A0G2JIW1;P0DMV8;P0DMV9	24	0	1	1990
A0A0J9YW64	1	0	1	1990
A0A0U1RQF0;P49327	2	0	1	1990
A0A0U1RR32;A0A0U1RRH7;P04908;P0C0S8;P16104;P20671;Q7L7L0;Q93077;Q96KK5;Q99878;Q9BTM1	7	0	1	1990
A0A1B0GVN9;H0Y5R6;P06132	3	0	1	1990
A0A1C7CYX8;C9J3Q3;C9J6N5;C9JP05;C9JQ40;C9JW51;H3BP16;H3BP24;H3BQU2;J3QT48;P19320;Q9H098;Q9NVX0;X6RET8	1	0	1	1990
A0A1W2PNU5;F5GY90;F5H0P4;F5H345;P08397	2	0	1	1990
A2A3N6;A6PVX3;P55036;Q5VWC4	1	0	1	1990
A2RRP1;H0Y5G7;H7BZR3;H7C1Y9	1	0	1	1990
A6NFX8;Q9UKK9	6	0	1	1990
A6NHG4;B5MC82;J3KQ18;P30046	1	0	1	1990
A6NHL2	1	0	1	1990
A6NJA2;P54578	3	0	1	1990
A8MXH2;C9J6D1;E9PJJ2;E9PKI2;E9PNJ7;E9PNW0;E9PP22;E9PS34;Q99733	1	0	1	1990
B1AJY5;B1AJY7;O75832	2	0	1	1990
B1ALA9;P60891	3	0	1	1990
B4DIH5;P61201	2	0	1	1990
B4DJ81;P28331	1	0	1	1990
B4DNK4;H3BQ34;H3BTN5;P14618	1	0	1	1990
B4DUC8;J3QSB7;Q13126	4	0	1	1990
B4DUR8;P49368	7	0	1	1990
B4DV12;F5GXK7;F5GYU3;F5H265;F5H2Z3;F5H388;F5H6Q2;F5H747;J3QKN0;J3QS39;J3QTR3;P0CG47;P0CG48;P62979;P62987;Q5PY61;Q96C32	9	0	1	1990
B5MDF5;F5H018;J3KQE5;P62826	1	0	1	1990
B7Z596;F5H7S3;H0YK48;H0YKX5;H0YL52;H0YNC7;H7BYY1;P09493;Q6ZN40	4	0	1	1990
B7ZAR1;E7ENZ3;E9PCA1;P48643	5	0	1	1990
C9J1E1;P53004	1	0	1	1990
C9J5S7;F8WE65;P62937	3	0	1	1990
C9J6A7;Q2QD12;Q96AT9	1	0	1	1990
C9J8H1;P36543	1	0	1	1990
C9J8U2;G5E977;Q6XQN6	2	0	1	1990
C9J9C7;Q9Y6F1	1	0	1	1990
C9JIG9;O95747	1	0	1	1990
C9JLV5;J3KTQ1;J3QKR0;J3QL22;J3QS85;Q9UNS2	1	0	1	1990
C9JNR4;C9JX21;E9PQH6;P08134;P61586;Q5JR05;Q5JR07;Q5JR08;U3KQA9;U3KQV3	2	0	1	1990
C9JQT8;C9JUV8;E9PRR1;O00478;P78410;S4R3N0	1	0	1	1990
C9JXJ9;F5H543;F6VN83;H7C0X6;Q6PHW0;transcript=PF3D7_1372000.1	1	0	1	1990
D6RAX7;D6RFN0;Q9BT78	1	0	1	1990
D6RF62;E9PBS1;P22234	1	0	1	1990
E1CEI4;P48506	2	0	1	1990
E7EM64;Q7L5N1	2	0	1	1990
E7EMB6;E7ETB3;Q9ULA0	2	0	1	1990
E7EMK3;J3QLD9;Q14254	2	0	1	1990
E7END7;P62820;Q9H0U4	3	0	1	1990
E7EQ47;F6XSS0;P18577;Q02161	1	0	1	1990
E7EQR6;F5H282;P17987	3	0	1	1990
E7ESC6;Q9UIA9	3	0	1	1990
E7ETR0;Q9Y265	1	0	1	1990
E7ETZ0;F8WBR5;G3V479;H0Y7A7;M0QZ52;P0DP23;P0DP24;P0DP25	2	0	1	1990
E7EX29;P63104	2	0	1	1990
E9PGT1;H7C1D4;Q15631	1	0	1	1990
E9PHM6;F6QMI7;F8W9J4;H0YC82;Q03001	1	0	1	1990
E9PI86;E9PPQ8;E9PPR5;P49321	1	0	1	1990
E9PLJ0;O95373	1	0	1	1990
E9PLK3;P55786	9	0	1	1990
E9PMR6;Q9NZN5	1	0	1	1990
E9PP76;J3KNF4;O14618	1	0	1	1990
E9PQ73;Q8TDW7	2	0	1	1990
F2Z393;P37837	6	0	1	1990
F5GWF6;F8VQ14;P78371	3	0	1	1990
F5GXS2;H0YJ11;H0YJW3;H7C144;H7C5W8;H9KV75;O43707;P12814	1	0	1	1990
F5GY55;Q16531	9	0	1	1990
F5H2F4;P11586	2	0	1	1990
F6TLX2;Q9HC38	2	0	1	1990
F6VDH7;H7C3I1;P50502;Q3KNR6;Q8IZP2	4	0	1	1990
F8W914;Q9NQC3	1	0	1	1990
F8WBF9;Q5TH30;Q9UGV2	2	0	1	1990
F8WE04;P04792	1	0	1	1990
G3V180;G3V1D3;Q9NY33	5	0	1	1990
G3V2M8;G3V363;G3V4I1;G3V5F3;H0YJS6;J3KNG4;Q8WVM8	1	0	1	1990
G3V4K2;G3V5T7;P01111;P01112;P01116	1	0	1	1990
G3V5E5;H0YJJ8;P49770	1	0	1	1990
G3V5Z7;P60900	5	0	1	1990
H0Y3Z3;H7BZ94;P07237	3	0	1	1990
H0Y4J6;H0YID2;P00568;Q5T9B7;Q9Y6K8	1	0	1	1990
H0YAS8;P10909	2	0	1	1990
H0YH81;P06576	2	0	1	1990
H0YI76;P13647	1	0	1	1990
H0YI90;H0YII4;Q5TDH0	3	0	1	1990
H3BMU1;H3BUI0;J3KR23;P53990	1	0	1	1990
H3BPK3;H3BPQ4;Q16775	4	0	1	1990
H3BQN4;H3BU78;J3KPS3;P04075	2	0	1	1990
H3BRQ0;Q96CD2	2	0	1	1990
I3L0K2;I3L3M7;Q9BRA2	1	0	1	1990
I3L0N3;P46459	4	0	1	1990
I3L4J1;O75351;Q9UN37	2	0	1	1990
J3KNE3;P68402	1	0	1	1990
J3KPD9;P22392;Q32Q12	4	0	1	1990
J3KQ32;Q9NTK5	2	0	1	1990
J3KRP2;J3QSA9;P62195	8	0	1	1990
J3KRZ4;J3KS22;J3KSZ5;J3QL34;J3QS36;J3QS45;Q7Z4W1	1	0	1	1990
K7EIJ8;K7EM02;Q8IYT4	1	0	1	1990
K7ELW0;Q99497	2	0	1	1990
K7ELW1;K7ENJ0;P54725	1	0	1	1990
K7EM19;K7ENX2;K7ESA3;Q99536	1	0	1	1990
K7EP46;P52888	2	0	1	1990
K7EPB2;P10644	2	0	1	1990
K7EPJ9;Q04695	1	0	1	1990
K7ES02;Q13867	9	0	1	1990
M0QXI6;M0R0Y3;Q9Y230;X6R2L4	1	0	1	1990
M0R165;M0R2S2;Q9UBC2	1	0	1	1990
O00231	5	0	1	1990
O00232	2	0	1	1990
O00487	1	0	1	1990
O14818	5	0	1	1990
O14964	1	0	1	1990
O14980	7	0	1	1990
O15165	1	0	1	1990
O15400	2	0	1	1990
O43242	2	0	1	1990
O43396	3	0	1	1990
O43865	1	0	1	1990
O60814;P06899;P23527;P33778;P57053;P58876;P62807;Q16778;Q5QNW6;Q93079;Q96A08;Q99877;Q99879;Q99880;U3KQK0	2	0	1	1990
O75695	2	0	1	1990
O94768	1	0	1	1990
O94919	1	0	1	1990
O95782	4	0	1	1990
O95837;P29992;P50148	1	0	1	1990
P00338	6	0	1	1990
P00352	12	0	1	1990
P00390	20	0	1	1990
P00441	17	0	1	1990
P00491	6	0	1	1990
P00492	11	0	1	1990
P00558	5	0	1	1990
P00918	8	0	1	1990
P02042	50	0	1	1990
P02533;P08779	2	0	1	1990
P02538;P48668	1	0	1	1990
P02751	1	0	1	1990
P04083	3	0	1	1990
P04259	2	0	1	1990
P04264	13	0	1	1990
P04350;P68371	5	0	1	1990
P04406	51	0	1	1990
P05089	1	0	1	1990
P05546	1	0	1	1990
P05787	1	0	1	1990
P06733	8	0	1	1990
P07195	9	0	1	1990
P07384	16	0	1	1990
P07738	2	0	1	1990
P07900	4	0	1	1990
P08237	1	0	1	1990
P08238	18	0	1	1990
P09211	9	0	1	1990
P10599	3	0	1	1990
P10768;X6RA14	4	0	1	1990
P11142	36	0	1	1990
P11166	4	0	1	1990
P11171;Q4VB86	27	0	1	1990
P11277	71	0	1	1990
P12955	3	0	1	1990
P13645	10	0	1	1990
P13716	13	0	1	1990
P14174	1	0	1	1990
P14735	1	0	1	1990
P16083;Q5TD05;Q5TD07	2	0	1	1990
P16152	7	0	1	1990
P16452	7	0	1	1990
P17066	2	0	1	1990
P17174	6	0	1	1990
P17612	3	0	1	1990
P17858	2	0	1	1990
P18206	1	0	1	1990
P20618	7	0	1	1990
P21980	3	0	1	1990
P22314	3	0	1	1990
P23526	12	0	1	1990
P24666	2	0	1	1990
P25786	9	0	1	1990
P25788	4	0	1	1990
P25789	6	0	1	1990
P26447	2	0	1	1990
P27105	5	0	1	1990
P28066	6	0	1	1990
P28070	2	0	1	1990
P28072	1	0	1	1990
P28074	4	0	1	1990
P28289	21	0	1	1990
P29144;Q5VZU9	8	0	1	1990
P30041	9	0	1	1990
P30085;Q5T0D2	1	0	1	1990
P30153	5	0	1	1990
P30740	7	0	1	1990
P31150	1	0	1	1990
P31939	5	0	1	1990
P31948	2	0	1	1990
P32119	29	0	1	1990
P35527	4	0	1	1990
P35579	4	0	1	1990
P35612	30	0	1	1990
P35754	7	0	1	1990
P35908	12	0	1	1990
P35998	6	0	1	1990
P36959	10	0	1	1990
P38606	5	0	1	1990
P40227	4	0	1	1990
P40925	8	0	1	1990
P41091;Q2VIR3	1	0	1	1990
P45974	3	0	1	1990
P48147	4	0	1	1990
P48426	4	0	1	1990
P48637	6	0	1	1990
P48729	2	0	1	1990
P49189	3	0	1	1990
P49247	6	0	1	1990
P49720	3	0	1	1990
P49721	3	0	1	1990
P50395	6	0	1	1990
P50570	4	0	1	1990
P50990	10	0	1	1990
P50991	7	0	1	1990
P51665	2	0	1	1990
P53396	9	0	1	1990
P54652	1	0	1	1990
P55060	1	0	1	1990
P55072	23	0	1	1990
P60174	20	0	1	1990
P60709	30	0	1	1990
P61020	2	0	1	1990
P61224;P62834	4	0	1	1990
P61225	1	0	1	1990
P61812	1	0	1	1990
P61970	10	0	1	1990
P61981	1	0	1	1990
P62191	3	0	1	1990
P62258	8	0	1	1990
P62714	1	0	1	1990
P62736;P63267;P68032;P68133	1	0	1	1990
P62805	5	0	1	1990
P62906	1	0	1	1990
P67775	2	0	1	1990
P69891	2	0	1	1990
P69892	7	0	1	1990
P78417;Q5TA02	4	0	1	1990
PF3D7_0102200	24	0	1	1990
PF3D7_0102500	3	0	1	1990
PF3D7_0102900	12	0	1	1990
PF3D7_0103100	2	0	1	1990
PF3D7_0103300	2	0	1	1990
PF3D7_0103900	8	0	1	1990
PF3D7_0104200	2	0	1	1990
PF3D7_0104400	1	0	1	1990
PF3D7_0104500	4	0	1	1990
PF3D7_0105200	9	0	1	1990
PF3D7_0105300	1	0	1	1990
PF3D7_0105600	3	0	1	1990
PF3D7_0105700	1	0	1	1990
PF3D7_0105800	1	0	1	1990
PF3D7_0106000	3	0	1	1990
PF3D7_0106100	8	0	1	1990
PF3D7_0106300	2	0	1	1990
PF3D7_0106400	1	0	1	1990
PF3D7_0106700	4	0	1	1990
PF3D7_0106800	3	0	1	1990
PF3D7_0107000	1	0	1	1990
PF3D7_0107500	5	0	1	1990
PF3D7_0108000	15	0	1	1990
PF3D7_0108300	24	0	1	1990
PF3D7_0108500	6	0	1	1990
PF3D7_0108700	3	0	1	1990
PF3D7_0109200	1	0	1	1990
PF3D7_0109400	3	0	1	1990
PF3D7_0109500	1	0	1	1990
PF3D7_0109800	3	0	1	1990
PF3D7_0110400	3	0	1	1990
PF3D7_0110500	4	0	1	1990
PF3D7_0110600	2	0	1	1990
PF3D7_0110700	6	0	1	1990
PF3D7_0111400	3	0	1	1990
PF3D7_0111500	3	0	1	1990
PF3D7_0111800	4	0	1	1990
PF3D7_0112000	5	0	1	1990
PF3D7_0112200	3	0	1	1990
PF3D7_0113000	5	0	1	1990
PF3D7_0202200	1	0	1	1990
PF3D7_0203000	4	0	1	1990
PF3D7_0203100	1	0	1	1990
PF3D7_0203400	1	0	1	1990
PF3D7_0203700	1	0	1	1990
PF3D7_0204100	2	0	1	1990
PF3D7_0204500	6	0	1	1990
PF3D7_0204700	2	0	1	1990
PF3D7_0205400	2	0	1	1990
PF3D7_0205500	3	0	1	1990
PF3D7_0205600	2	0	1	1990
PF3D7_0205900	30	0	1	1990
PF3D7_0206700	3	0	1	1990
PF3D7_0207400	9	0	1	1990
PF3D7_0207500	28	0	1	1990
PF3D7_0207700	18	0	1	1990
PF3D7_0207800	7	0	1	1990
PF3D7_0208100	2	0	1	1990
PF3D7_0208200	4	0	1	1990
PF3D7_0208400	1	0	1	1990
PF3D7_0208500	3	0	1	1990
PF3D7_0208700	1	0	1	1990
PF3D7_0209400	3	0	1	1990
PF3D7_0209800	24	0	1	1990
PF3D7_0210000	1	0	1	1990
PF3D7_0210100	3	0	1	1990
PF3D7_0210200	3	0	1	1990
PF3D7_0210900	4	0	1	1990
PF3D7_0211200	2	0	1	1990
PF3D7_0211800	16	0	1	1990
PF3D7_0212300	10	0	1	1990
PF3D7_0212400	6	0	1	1990
PF3D7_0212500	3	0	1	1990
PF3D7_0212900	4	0	1	1990
PF3D7_0213100	12	0	1	1990
PF3D7_0213500	1	0	1	1990
PF3D7_0213700	2	0	1	1990
PF3D7_0214000	23	0	1	1990
PF3D7_0214100	17	0	1	1990
PF3D7_0214400	1	0	1	1990
PF3D7_0214900	3	0	1	1990
PF3D7_0215000	4	0	1	1990
PF3D7_0215700	11	0	1	1990
PF3D7_0215800	3	0	1	1990
PF3D7_0216200	1	0	1	1990
PF3D7_0216400	7	0	1	1990
PF3D7_0217100	4	0	1	1990
PF3D7_0217500	13	0	1	1990
PF3D7_0217900	6	0	1	1990
PF3D7_0218000	11	0	1	1990
PF3D7_0218400	2	0	1	1990
PF3D7_0218500	7	0	1	1990
PF3D7_0218600	2	0	1	1990
PF3D7_0218700	2	0	1	1990
PF3D7_0219400	2	0	1	1990
PF3D7_0219600	6	0	1	1990
PF3D7_0220000	82	0	1	1990
PF3D7_0220100	2	0	1	1990
PF3D7_0220800	6	0	1	1990
PF3D7_0300900	2	0	1	1990
PF3D7_0301700	5	0	1	1990
PF3D7_0302000	3	0	1	1990
PF3D7_0302100	5	0	1	1990
PF3D7_0302500	65	0	1	1990
PF3D7_0302800	3	0	1	1990
PF3D7_0302900	20	0	1	1990
PF3D7_0303000	15	0	1	1990
PF3D7_0303100	2	0	1	1990
PF3D7_0303200	2	0	1	1990
PF3D7_0303300	2	0	1	1990
PF3D7_0303700	9	0	1	1990
PF3D7_0304100	2	0	1	1990
PF3D7_0304200	5	0	1	1990
PF3D7_0304400	1	0	1	1990
PF3D7_0304500	1	0	1	1990
PF3D7_0305200	2	0	1	1990
PF3D7_0305600	6	0	1	1990
PF3D7_0305700	5	0	1	1990
PF3D7_0306200	7	0	1	1990
PF3D7_0306300	4	0	1	1990
PF3D7_0306800	33	0	1	1990
PF3D7_0306900	3	0	1	1990
PF3D7_0307100	19	0	1	1990
PF3D7_0307200	13	0	1	1990
PF3D7_0307500	7	0	1	1990
PF3D7_0308000	7	0	1	1990
PF3D7_0308200	26	0	1	1990
PF3D7_0308300	1	0	1	1990
PF3D7_0308500	2	0	1	1990
PF3D7_0308600	9	0	1	1990
PF3D7_0308900	6	0	1	1990
PF3D7_0309300	2	0	1	1990
PF3D7_0309500	25	0	1	1990
PF3D7_0309600	21	0	1	1990
PF3D7_0310300	9	0	1	1990
PF3D7_0310400	36	0	1	1990
PF3D7_0310500	6	0	1	1990
PF3D7_0310600	10	0	1	1990
PF3D7_0310700	2	0	1	1990
PF3D7_0311300	2	0	1	1990
PF3D7_0312300	7	0	1	1990
PF3D7_0312400	6	0	1	1990
PF3D7_0312800	9	0	1	1990
PF3D7_0314000	3	0	1	1990
PF3D7_0314100	1	0	1	1990
PF3D7_0315100	15	0	1	1990
PF3D7_0316300	9	0	1	1990
PF3D7_0316500	7	0	1	1990
PF3D7_0316600	2	0	1	1990
PF3D7_0317000	15	0	1	1990
PF3D7_0317200	6	0	1	1990
PF3D7_0317300	15	0	1	1990
PF3D7_0317400	3	0	1	1990
PF3D7_0317600	6	0	1	1990
PF3D7_0317700	3	0	1	1990
PF3D7_0317800	7	0	1	1990
PF3D7_0318200	23	0	1	1990
PF3D7_0318300	5	0	1	1990
PF3D7_0319100	3	0	1	1990
PF3D7_0319200	3	0	1	1990
PF3D7_0319600	9	0	1	1990
PF3D7_0320000	1	0	1	1990
PF3D7_0320100	4	0	1	1990
PF3D7_0320300	25	0	1	1990
PF3D7_0320500	10	0	1	1990
PF3D7_0320800	10	0	1	1990
PF3D7_0320900	5	0	1	1990
PF3D7_0322000	8	0	1	1990
PF3D7_0322100	1	0	1	1990
PF3D7_0322400	2	0	1	1990
PF3D7_0322900	17	0	1	1990
PF3D7_0323000	3	0	1	1990
PF3D7_0323500	3	0	1	1990
PF3D7_0323700	4	0	1	1990
PF3D7_0401800	9	0	1	1990
PF3D7_0402000	9	0	1	1990
PF3D7_0402100	3	0	1	1990
PF3D7_0402400	5	0	1	1990
PF3D7_0403500	1	0	1	1990
PF3D7_0403600	1	0	1	1990
PF3D7_0403700	4	0	1	1990
PF3D7_0404900	10	0	1	1990
PF3D7_0405100	7	0	1	1990
PF3D7_0405400	32	0	1	1990
PF3D7_0405600	2	0	1	1990
PF3D7_0405900	1	0	1	1990
PF3D7_0406100	24	0	1	1990
PF3D7_0406200	3	0	1	1990
PF3D7_0406400	1	0	1	1990
PF3D7_0406700	2	0	1	1990
PF3D7_0407800	2	0	1	1990
PF3D7_0408500	7	0	1	1990
PF3D7_0409100	2	0	1	1990
PF3D7_0409200	1	0	1	1990
PF3D7_0409400	1	0	1	1990
PF3D7_0409600	10	0	1	1990
PF3D7_0410400	4	0	1	1990
PF3D7_0410600	7	0	1	1990
PF3D7_0410800	5	0	1	1990
PF3D7_0410900	5	0	1	1990
PF3D7_0411100	1	0	1	1990
PF3D7_0411900	10	0	1	1990
PF3D7_0412000	1	0	1	1990
PF3D7_0412200	2	0	1	1990
PF3D7_0413600	16	0	1	1990
PF3D7_0413700	7	0	1	1990
PF3D7_0413900	11	0	1	1990
PF3D7_0414000	16	0	1	1990
PF3D7_0415000	6	0	1	1990
PF3D7_0415200	1	0	1	1990
PF3D7_0415300	4	0	1	1990
PF3D7_0415400	1	0	1	1990
PF3D7_0415500	3	0	1	1990
PF3D7_0415900	10	0	1	1990
PF3D7_0416400	4	0	1	1990
PF3D7_0416800	13	0	1	1990
PF3D7_0417200	9	0	1	1990
PF3D7_0417500	10	0	1	1990
PF3D7_0418200	9	0	1	1990
PF3D7_0418500	5	0	1	1990
PF3D7_0418700	3	0	1	1990
PF3D7_0419400	5	0	1	1990
PF3D7_0419600	4	0	1	1990
PF3D7_0419800	5	0	1	1990
PF3D7_0420600	3	0	1	1990
PF3D7_0422500	26	0	1	1990
PF3D7_0422700	8	0	1	1990
PF3D7_0423600	6	0	1	1990
PF3D7_0424600	3	0	1	1990
PF3D7_0501000	8	0	1	1990
PF3D7_0501100	4	0	1	1990
PF3D7_0501200	10	0	1	1990
PF3D7_0501300	6	0	1	1990
PF3D7_0501500	7	0	1	1990
PF3D7_0501800	2	0	1	1990
PF3D7_0501900	1	0	1	1990
PF3D7_0503200	3	0	1	1990
PF3D7_0503300	3	0	1	1990
PF3D7_0503400	5	0	1	1990
PF3D7_0503800	2	0	1	1990
PF3D7_0504000	4	0	1	1990
PF3D7_0504600	11	0	1	1990
PF3D7_0504800	4	0	1	1990
PF3D7_0505000	3	0	1	1990
PF3D7_0505100	5	0	1	1990
PF3D7_0505200	7	0	1	1990
PF3D7_0505500	11	0	1	1990
PF3D7_0505800	6	0	1	1990
PF3D7_0506800	2	0	1	1990
PF3D7_0506900	1	0	1	1990
PF3D7_0507100	23	0	1	1990
PF3D7_0507500	2	0	1	1990
PF3D7_0507600	5	0	1	1990
PF3D7_0507700	18	0	1	1990
PF3D7_0507800	3	0	1	1990
PF3D7_0508000	5	0	1	1990
PF3D7_0508300	1	0	1	1990
PF3D7_0508700	4	0	1	1990
PF3D7_0508800	2	0	1	1990
PF3D7_0508900	2	0	1	1990
PF3D7_0509000	7	0	1	1990
PF3D7_0509100	7	0	1	1990
PF3D7_0509400	8	0	1	1990
PF3D7_0509900	1	0	1	1990
PF3D7_0510100	8	0	1	1990
PF3D7_0510200	1	0	1	1990
PF3D7_0510500	3	0	1	1990
PF3D7_0511000	13	0	1	1990
PF3D7_0511500	17	0	1	1990
PF3D7_0511800	47	0	1	1990
PF3D7_0512000	8	0	1	1990
PF3D7_0512200	4	0	1	1990
PF3D7_0512300	1	0	1	1990
PF3D7_0512500	1	0	1	1990
PF3D7_0512600	8	0	1	1990
PF3D7_0512700	5	0	1	1990
PF3D7_0513100	4	0	1	1990
PF3D7_0513200	3	0	1	1990
PF3D7_0513300	35	0	1	1990
PF3D7_0513600	10	0	1	1990
PF3D7_0513800	2	0	1	1990
PF3D7_0514900	1	0	1	1990
PF3D7_0515000	2	0	1	1990
PF3D7_0515700	1	0	1	1990
PF3D7_0516200	16	0	1	1990
PF3D7_0516400	4	0	1	1990
PF3D7_0516700	5	0	1	1990
PF3D7_0516900	10	0	1	1990
PF3D7_0517000	9	0	1	1990
PF3D7_0517300	13	0	1	1990
PF3D7_0517400	31	0	1	1990
PF3D7_0517700	19	0	1	1990
PF3D7_0518200	2	0	1	1990
PF3D7_0518300	14	0	1	1990
PF3D7_0518500	3	0	1	1990
PF3D7_0519200	2	0	1	1990
PF3D7_0519400	14	0	1	1990
PF3D7_0519500	1	0	1	1990
PF3D7_0519600	1	0	1	1990
PF3D7_0519800	2	0	1	1990
PF3D7_0520300	3	0	1	1990
PF3D7_0520400	4	0	1	1990
PF3D7_0520700	1	0	1	1990
PF3D7_0520900	30	0	1	1990
PF3D7_0521700	10	0	1	1990
PF3D7_0521900	1	0	1	1990
PF3D7_0522200	1	0	1	1990
PF3D7_0522300	2	0	1	1990
PF3D7_0522800	2	0	1	1990
PF3D7_0523000	8	0	1	1990
PF3D7_0523100	8	0	1	1990
PF3D7_0523400	4	0	1	1990
PF3D7_0523800	1	0	1	1990
PF3D7_0524000	88	0	1	1990
PF3D7_0524400	18	0	1	1990
PF3D7_0524600	3	0	1	1990
PF3D7_0524900	2	0	1	1990
PF3D7_0525100	48	0	1	1990
PF3D7_0525200	3	0	1	1990
PF3D7_0525800	5	0	1	1990
PF3D7_0526500	6	0	1	1990
PF3D7_0526900	2	0	1	1990
PF3D7_0527000	14	0	1	1990
PF3D7_0527100	7	0	1	1990
PF3D7_0527200	4	0	1	1990
PF3D7_0527500	18	0	1	1990
PF3D7_0527600	3	0	1	1990
PF3D7_0527900	6	0	1	1990
PF3D7_0528000	3	0	1	1990
PF3D7_0528100	12	0	1	1990
PF3D7_0528200	13	0	1	1990
PF3D7_0528700	2	0	1	1990
PF3D7_0528800	5	0	1	1990
PF3D7_0529400	9	0	1	1990
PF3D7_0529500	4	0	1	1990
PF3D7_0529800	6	0	1	1990
PF3D7_0530900	2	0	1	1990
PF3D7_0531400	1	0	1	1990
PF3D7_0532100	10	0	1	1990
PF3D7_0532400	13	0	1	1990
PF3D7_0601600	1	0	1	1990
PF3D7_0602100	7	0	1	1990
PF3D7_0602400	1	0	1	1990
PF3D7_0602600	3	0	1	1990
PF3D7_0603400	10	0	1	1990
PF3D7_0604300	1	0	1	1990
PF3D7_0604500	12	0	1	1990
PF3D7_0604700	1	0	1	1990
PF3D7_0605100	17	0	1	1990
PF3D7_0606200	1	0	1	1990
PF3D7_0606500	1	0	1	1990
PF3D7_0606600	12	0	1	1990
PF3D7_0606700	14	0	1	1990
PF3D7_0606800	4	0	1	1990
PF3D7_0606900	2	0	1	1990
PF3D7_0607000	14	0	1	1990
PF3D7_0608500	13	0	1	1990
PF3D7_0608700	30	0	1	1990
PF3D7_0608800	54	0	1	1990
PF3D7_0609000	6	0	1	1990
PF3D7_0610200	4	0	1	1990
PF3D7_0610400	3	0	1	1990
PF3D7_0610500	2	0	1	1990
PF3D7_0610800	23	0	1	1990
PF3D7_0610900	8	0	1	1990
PF3D7_0611400	7	0	1	1990
PF3D7_0611800	1	0	1	1990
PF3D7_0611900	1	0	1	1990
PF3D7_0612700	5	0	1	1990
PF3D7_0612900	9	0	1	1990
PF3D7_0613300	2	0	1	1990
PF3D7_0613500	2	0	1	1990
PF3D7_0613700	2	0	1	1990
PF3D7_0613800	10	0	1	1990
PF3D7_0613900	3	0	1	1990
PF3D7_0614400	2	0	1	1990
PF3D7_0614500	3	0	1	1990
PF3D7_0615400	12	0	1	1990
PF3D7_0615600	1	0	1	1990
PF3D7_0615800	3	0	1	1990
PF3D7_0616200	2	0	1	1990
PF3D7_0616300	2	0	1	1990
PF3D7_0616800	3	0	1	1990
PF3D7_0617100	3	0	1	1990
PF3D7_0617200	21	0	1	1990
PF3D7_0617400	2	0	1	1990
PF3D7_0617800	7	0	1	1990
PF3D7_0618200	5	0	1	1990
PF3D7_0618500	2	0	1	1990
PF3D7_0618700	2	0	1	1990
PF3D7_0619000	4	0	1	1990
PF3D7_0619200	1	0	1	1990
PF3D7_0619500	14	0	1	1990
PF3D7_0619900	2	0	1	1990
PF3D7_0620500	3	0	1	1990
PF3D7_0621100	1	0	1	1990
PF3D7_0621300	3	0	1	1990
PF3D7_0621800	10	0	1	1990
PF3D7_0621900	10	0	1	1990
PF3D7_0622200	5	0	1	1990
PF3D7_0622800	7	0	1	1990
PF3D7_0623100	8	0	1	1990
PF3D7_0623500	6	0	1	1990
PF3D7_0623600	6	0	1	1990
PF3D7_0623900	2	0	1	1990
PF3D7_0624000	19	0	1	1990
PF3D7_0624600	27	0	1	1990
PF3D7_0625300	1	0	1	1990
PF3D7_0625600	3	0	1	1990
PF3D7_0626000	5	0	1	1990
PF3D7_0626200	1	0	1	1990
PF3D7_0626700	9	0	1	1990
PF3D7_0627300	1	0	1	1990
PF3D7_0627500	25	0	1	1990
PF3D7_0627700	11	0	1	1990
PF3D7_0627800	8	0	1	1990
PF3D7_0628200	3	0	1	1990
PF3D7_0629100	12	0	1	1990
PF3D7_0629200	9	0	1	1990
PF3D7_0629400	2	0	1	1990
PF3D7_0629700	10	0	1	1990
PF3D7_0629800	7	0	1	1990
PF3D7_0629900	1	0	1	1990
PF3D7_0630300	6	0	1	1990
PF3D7_0630500	1	0	1	1990
PF3D7_0702400	2	0	1	1990
PF3D7_0702500	2	0	1	1990
PF3D7_0703200	3	0	1	1990
PF3D7_0703500	25	0	1	1990
PF3D7_0703600	2	0	1	1990
PF3D7_0703700	6	0	1	1990
PF3D7_0703900	2	0	1	1990
PF3D7_0704000	5	0	1	1990
PF3D7_0704100	3	0	1	1990
PF3D7_0704200	5	0	1	1990
PF3D7_0704300	5	0	1	1990
PF3D7_0704400	2	0	1	1990
PF3D7_0704600	6	0	1	1990
PF3D7_0705300	4	0	1	1990
PF3D7_0705400	20	0	1	1990
PF3D7_0705500	3	0	1	1990
PF3D7_0705700	4	0	1	1990
PF3D7_0706000	24	0	1	1990
PF3D7_0706500	6	0	1	1990
PF3D7_0707200	2	0	1	1990
PF3D7_0707300	16	0	1	1990
PF3D7_0707400	1	0	1	1990
PF3D7_0707600	2	0	1	1990
PF3D7_0707900	2	0	1	1990
PF3D7_0708100	2	0	1	1990
PF3D7_0708300	2	0	1	1990
PF3D7_0708800	57	0	1	1990
PF3D7_0709300	5	0	1	1990
PF3D7_0709400	2	0	1	1990
PF3D7_0709500	3	0	1	1990
PF3D7_0709700	6	0	1	1990
PF3D7_0710200	26	0	1	1990
PF3D7_0710600	1	0	1	1990
PF3D7_0711000	4	0	1	1990
PF3D7_0711500	21	0	1	1990
PF3D7_0714000	8	0	1	1990
PF3D7_0714200	8	0	1	1990
PF3D7_0714500	7	0	1	1990
PF3D7_0715200	2	0	1	1990
PF3D7_0715300	1	0	1	1990
PF3D7_0715900	5	0	1	1990
PF3D7_0716000	3	0	1	1990
PF3D7_0716100	3	0	1	1990
PF3D7_0716300	4	0	1	1990
PF3D7_0716400	1	0	1	1990
PF3D7_0716800	14	0	1	1990
PF3D7_0717400	2	0	1	1990
PF3D7_0717700	10	0	1	1990
PF3D7_0718500	4	0	1	1990
PF3D7_0719300	2	0	1	1990
PF3D7_0719600	9	0	1	1990
PF3D7_0719700	11	0	1	1990
PF3D7_0720200	4	0	1	1990
PF3D7_0720400	14	0	1	1990
PF3D7_0721000	1	0	1	1990
PF3D7_0721100	9	0	1	1990
PF3D7_0721400	4	0	1	1990
PF3D7_0721600	17	0	1	1990
PF3D7_0722200	3	0	1	1990
PF3D7_0722400	11	0	1	1990
PF3D7_0723400	2	0	1	1990
PF3D7_0723800	16	0	1	1990
PF3D7_0723900	5	0	1	1990
PF3D7_0724000	1	0	1	1990
PF3D7_0724700	4	0	1	1990
PF3D7_0725000	1	0	1	1990
PF3D7_0725100	1	0	1	1990
PF3D7_0725300	2	0	1	1990
PF3D7_0726500	7	0	1	1990
PF3D7_0727400	25	0	1	1990
PF3D7_0727800	1	0	1	1990
PF3D7_0729000	2	0	1	1990
PF3D7_0729100	4	0	1	1990
PF3D7_0729200	4	0	1	1990
PF3D7_0729300	4	0	1	1990
PF3D7_0729400	1	0	1	1990
PF3D7_0729500	2	0	1	1990
PF3D7_0730200	3	0	1	1990
PF3D7_0730400	1	0	1	1990
PF3D7_0730900	7	0	1	1990
PF3D7_0731100	1	0	1	1990
PF3D7_0731300	5	0	1	1990
PF3D7_0731500	4	0	1	1990
PF3D7_0731600	18	0	1	1990
PF3D7_0801000	9	0	1	1990
PF3D7_0801800	19	0	1	1990
PF3D7_0802000	25	0	1	1990
PF3D7_0802100	2	0	1	1990
PF3D7_0802200	14	0	1	1990
PF3D7_0802300	1	0	1	1990
PF3D7_0802800	3	0	1	1990
PF3D7_0803000	1	0	1	1990
PF3D7_0803200	1	0	1	1990
PF3D7_0803600	3	0	1	1990
PF3D7_0803700	3	0	1	1990
PF3D7_0803800	10	0	1	1990
PF3D7_0804500	2	0	1	1990
PF3D7_0804600	3	0	1	1990
PF3D7_0804800	3	0	1	1990
PF3D7_0804900	5	0	1	1990
PF3D7_0806300	1	0	1	1990
PF3D7_0806800	3	0	1	1990
PF3D7_0807000	3	0	1	1990
PF3D7_0807300	5	0	1	1990
PF3D7_0807500	17	0	1	1990
PF3D7_0807600	9	0	1	1990
PF3D7_0807800	5	0	1	1990
PF3D7_0807900	7	0	1	1990
PF3D7_0808100	3	0	1	1990
PF3D7_0808200	2	0	1	1990
PF3D7_0808300	2	0	1	1990
PF3D7_0808400	9	0	1	1990
PF3D7_0809900	2	0	1	1990
PF3D7_0810000	2	0	1	1990
PF3D7_0810300	7	0	1	1990
PF3D7_0810500	3	0	1	1990
PF3D7_0810600	12	0	1	1990
PF3D7_0810800	12	0	1	1990
PF3D7_0811000	5	0	1	1990
PF3D7_0811400	9	0	1	1990
PF3D7_0811500	1	0	1	1990
PF3D7_0811600	26	0	1	1990
PF3D7_0812100	6	0	1	1990
PF3D7_0812400	31	0	1	1990
PF3D7_0812500	4	0	1	1990
PF3D7_0813200	2	0	1	1990
PF3D7_0813300	24	0	1	1990
PF3D7_0813400	20	0	1	1990
PF3D7_0813600	5	0	1	1990
PF3D7_0813900	4	0	1	1990
PF3D7_0814000	13	0	1	1990
PF3D7_0814200	21	0	1	1990
PF3D7_0814900	10	0	1	1990
PF3D7_0815200	22	0	1	1990
PF3D7_0815600	14	0	1	1990
PF3D7_0815800	7	0	1	1990
PF3D7_0816000	4	0	1	1990
PF3D7_0816100	1	0	1	1990
PF3D7_0816600	9	0	1	1990
PF3D7_0817300	4	0	1	1990
PF3D7_0817700	11	0	1	1990
PF3D7_0817900	3	0	1	1990
PF3D7_0818400	1	0	1	1990
PF3D7_0818700	3	0	1	1990
PF3D7_0819000	2	0	1	1990
PF3D7_0819600	2	0	1	1990
PF3D7_0819900	9	0	1	1990
PF3D7_0820000	3	0	1	1990
PF3D7_0820700	4	0	1	1990
PF3D7_0821200	1	0	1	1990
PF3D7_0821300	5	0	1	1990
PF3D7_0821400	1	0	1	1990
PF3D7_0821600	3	0	1	1990
PF3D7_0821700	6	0	1	1990
PF3D7_0822100	2	0	1	1990
PF3D7_0822300	7	0	1	1990
PF3D7_0822600	19	0	1	1990
PF3D7_0822800	4	0	1	1990
PF3D7_0823100	2	0	1	1990
PF3D7_0823200	7	0	1	1990
PF3D7_0823300	10	0	1	1990
PF3D7_0823800	1	0	1	1990
PF3D7_0824200	1	0	1	1990
PF3D7_0824400	2	0	1	1990
PF3D7_0824600	3	0	1	1990
PF3D7_0824800	1	0	1	1990
PF3D7_0824900	1	0	1	1990
PF3D7_0825000	3	0	1	1990
PF3D7_0826100	10	0	1	1990
PF3D7_0826500	3	0	1	1990
PF3D7_0826900	1	0	1	1990
PF3D7_0827000	3	0	1	1990
PF3D7_0828300	1	0	1	1990
PF3D7_0828500	3	0	1	1990
PF3D7_0828800	3	0	1	1990
PF3D7_0828900	3	0	1	1990
PF3D7_0829000	3	0	1	1990
PF3D7_0829200	1	0	1	1990
PF3D7_0829300	6	0	1	1990
PF3D7_0830400	2	0	1	1990
PF3D7_0830600	1	0	1	1990
PF3D7_0831400	2	0	1	1990
PF3D7_0831600	5	0	1	1990
PF3D7_0831700	35	0	1	1990
PF3D7_0901800	2	0	1	1990
PF3D7_0902800	5	0	1	1990
PF3D7_0903200	15	0	1	1990
PF3D7_0903400	29	0	1	1990
PF3D7_0903900	5	0	1	1990
PF3D7_0904000	4	0	1	1990
PF3D7_0904100	6	0	1	1990
PF3D7_0904500	2	0	1	1990
PF3D7_0904600	3	0	1	1990
PF3D7_0904700	2	0	1	1990
PF3D7_0904800	11	0	1	1990
PF3D7_0905400	56	0	1	1990
PF3D7_0905800	3	0	1	1990
PF3D7_0905900	9	0	1	1990
PF3D7_0906100	3	0	1	1990
PF3D7_0907100	1	0	1	1990
PF3D7_0907300	2	0	1	1990
PF3D7_0907400	5	0	1	1990
PF3D7_0907600	4	0	1	1990
PF3D7_0907700	12	0	1	1990
PF3D7_0908000	2	0	1	1990
PF3D7_0909300	1	0	1	1990
PF3D7_0909400	15	0	1	1990
PF3D7_0909600	6	0	1	1990
PF3D7_0909800	7	0	1	1990
PF3D7_0910100	27	0	1	1990
PF3D7_0910200	2	0	1	1990
PF3D7_0910900	1	0	1	1990
PF3D7_0911100	1	0	1	1990
PF3D7_0911900	10	0	1	1990
PF3D7_0912100	1	0	1	1990
PF3D7_0913000	1	0	1	1990
PF3D7_0913200	11	0	1	1990
PF3D7_0913400	1	0	1	1990
PF3D7_0914100	1	0	1	1990
PF3D7_0914300	2	0	1	1990
PF3D7_0914400	2	0	1	1990
PF3D7_0915000	1	0	1	1990
PF3D7_0915100	1	0	1	1990
PF3D7_0916700	10	0	1	1990
PF3D7_0917000	6	0	1	1990
PF3D7_0917500	3	0	1	1990
PF3D7_0917600	7	0	1	1990
PF3D7_0918000	3	0	1	1990
PF3D7_0918300	23	0	1	1990
PF3D7_0918600	2	0	1	1990
PF3D7_0918900	6	0	1	1990
PF3D7_0919000	23	0	1	1990
PF3D7_0919400	19	0	1	1990
PF3D7_0919700	3	0	1	1990
PF3D7_0919800	3	0	1	1990
PF3D7_0919900	1	0	1	1990
PF3D7_0920200	1	0	1	1990
PF3D7_0920700	1	0	1	1990
PF3D7_0920800	20	0	1	1990
PF3D7_0920900	3	0	1	1990
PF3D7_0921200	2	0	1	1990
PF3D7_0921600	3	0	1	1990
PF3D7_0921900	3	0	1	1990
PF3D7_0922100	12	0	1	1990
PF3D7_0922200	45	0	1	1990
PF3D7_0922400	1	0	1	1990
PF3D7_0922600	23	0	1	1990
PF3D7_0922800	3	0	1	1990
PF3D7_0923000	7	0	1	1990
PF3D7_0923400	1	0	1	1990
PF3D7_0923800	6	0	1	1990
PF3D7_0923900	12	0	1	1990
PF3D7_0924700	7	0	1	1990
PF3D7_0925700	3	0	1	1990
PF3D7_0926700	13	0	1	1990
PF3D7_0927300	1	0	1	1990
PF3D7_0927600	3	0	1	1990
PF3D7_0928200	1	0	1	1990
PF3D7_0929200	14	0	1	1990
PF3D7_0929400	108	0	1	1990
PF3D7_0929700	1	0	1	1990
PF3D7_0930800	1	0	1	1990
PF3D7_0931000	2	0	1	1990
PF3D7_0931400	4	0	1	1990
PF3D7_0931800	15	0	1	1990
PF3D7_0932100	1	0	1	1990
PF3D7_0932200	12	0	1	1990
PF3D7_0932800	11	0	1	1990
PF3D7_0933000	2	0	1	1990
PF3D7_0933200	6	0	1	1990
PF3D7_0933500	1	0	1	1990
PF3D7_0933600	9	0	1	1990
PF3D7_0934100	1	0	1	1990
PF3D7_0934500	6	0	1	1990
PF3D7_0934700	1	0	1	1990
PF3D7_0934800	7	0	1	1990
PF3D7_0935200	1	0	1	1990
PF3D7_0935800	31	0	1	1990
PF3D7_0935900	3	0	1	1990
PF3D7_0936000	2	0	1	1990
PF3D7_0936600	3	0	1	1990
PF3D7_0936800	4	0	1	1990
PF3D7_1001200	2	0	1	1990
PF3D7_1001600	4	0	1	1990
PF3D7_1001700	2	0	1	1990
PF3D7_1002400	7	0	1	1990
PF3D7_1002700	2	0	1	1990
PF3D7_1002800	2	0	1	1990
PF3D7_1002900	1	0	1	1990
PF3D7_1003300	2	0	1	1990
PF3D7_1003500	5	0	1	1990
PF3D7_1003600	1	0	1	1990
PF3D7_1003800	23	0	1	1990
PF3D7_1004000	11	0	1	1990
PF3D7_1004200	2	0	1	1990
PF3D7_1004300	5	0	1	1990
PF3D7_1004400	9	0	1	1990
PF3D7_1004500	5	0	1	1990
PF3D7_1005500	6	0	1	1990
PF3D7_1006200	12	0	1	1990
PF3D7_1006700	4	0	1	1990
PF3D7_1007200	3	0	1	1990
PF3D7_1007700	5	0	1	1990
PF3D7_1007900	28	0	1	1990
PF3D7_1008000	1	0	1	1990
PF3D7_1008100	14	0	1	1990
PF3D7_1008400	20	0	1	1990
PF3D7_1008700	21	0	1	1990
PF3D7_1008800	11	0	1	1990
PF3D7_1008900	11	0	1	1990
PF3D7_1009000	2	0	1	1990
PF3D7_1009200	1	0	1	1990
PF3D7_1009400	4	0	1	1990
PF3D7_1010100	2	0	1	1990
PF3D7_1010200	1	0	1	1990
PF3D7_1010600	7	0	1	1990
PF3D7_1010700	7	0	1	1990
PF3D7_1011400	10	0	1	1990
PF3D7_1011700	9	0	1	1990
PF3D7_1011800	45	0	1	1990
PF3D7_1012200	3	0	1	1990
PF3D7_1012500	2	0	1	1990
PF3D7_1012600	12	0	1	1990
PF3D7_1012700	6	0	1	1990
PF3D7_1012900	2	0	1	1990
PF3D7_1013100	1	0	1	1990
PF3D7_1013600	9	0	1	1990
PF3D7_1014100	4	0	1	1990
PF3D7_1014600	7	0	1	1990
PF3D7_1014900	10	0	1	1990
PF3D7_1015200	9	0	1	1990
PF3D7_1015300	3	0	1	1990
PF3D7_1015600	37	0	1	1990
PF3D7_1015800	13	0	1	1990
PF3D7_1016400	7	0	1	1990
PF3D7_1017000	10	0	1	1990
PF3D7_1017100	3	0	1	1990
PF3D7_1017300	3	0	1	1990
PF3D7_1017400	4	0	1	1990
PF3D7_1017900	20	0	1	1990
PF3D7_1018200	6	0	1	1990
PF3D7_1019000	12	0	1	1990
PF3D7_1019400	7	0	1	1990
PF3D7_1019700	3	0	1	1990
PF3D7_1020700	6	0	1	1990
PF3D7_1020900	9	0	1	1990
PF3D7_1021100	2	0	1	1990
PF3D7_1021500	2	0	1	1990
PF3D7_1021600	13	0	1	1990
PF3D7_1021800	2	0	1	1990
PF3D7_1021900	25	0	1	1990
PF3D7_1022100	2	0	1	1990
PF3D7_1022400	4	0	1	1990
PF3D7_1022500	2	0	1	1990
PF3D7_1023900	20	0	1	1990
PF3D7_1024800	6	0	1	1990
PF3D7_1025000	2	0	1	1990
PF3D7_1025300	6	0	1	1990
PF3D7_1025600	1	0	1	1990
PF3D7_1026000	5	0	1	1990
PF3D7_1026800	24	0	1	1990
PF3D7_1027300	24	0	1	1990
PF3D7_1027400	3	0	1	1990
PF3D7_1027700	4	0	1	1990
PF3D7_1027800	19	0	1	1990
PF3D7_1028400	12	0	1	1990
PF3D7_1028500	1	0	1	1990
PF3D7_1028700	3	0	1	1990
PF3D7_1029900	1	0	1	1990
PF3D7_1030000	5	0	1	1990
PF3D7_1030100	11	0	1	1990
PF3D7_1030500	7	0	1	1990
PF3D7_1030600	4	0	1	1990
PF3D7_1031200	1	0	1	1990
PF3D7_1031300	3	0	1	1990
PF3D7_1031500	1	0	1	1990
PF3D7_1031600	6	0	1	1990
PF3D7_1031900	1	0	1	1990
PF3D7_1032000	1	0	1	1990
PF3D7_1032100	2	0	1	1990
PF3D7_1032800	7	0	1	1990
PF3D7_1033100	12	0	1	1990
PF3D7_1033200	10	0	1	1990
PF3D7_1033300	1	0	1	1990
PF3D7_1033400	14	0	1	1990
PF3D7_1033600	6	0	1	1990
PF3D7_1033700	17	0	1	1990
PF3D7_1034000	3	0	1	1990
PF3D7_1034900	39	0	1	1990
PF3D7_1035300	18	0	1	1990
PF3D7_1035500	1	0	1	1990
PF3D7_1035700	3	0	1	1990
PF3D7_1035900	5	0	1	1990
PF3D7_1036900	8	0	1	1990
PF3D7_1037100	8	0	1	1990
PF3D7_1037500	7	0	1	1990
PF3D7_1037700	2	0	1	1990
PF3D7_1038000	1	0	1	1990
PF3D7_1039000	3	0	1	1990
PF3D7_1039100	1	0	1	1990
PF3D7_1102400	2	0	1	1990
PF3D7_1102500	2	0	1	1990
PF3D7_1103100	14	0	1	1990
PF3D7_1103600	7	0	1	1990
PF3D7_1103700	8	0	1	1990
PF3D7_1103800	13	0	1	1990
PF3D7_1104000	7	0	1	1990
PF3D7_1104100	1	0	1	1990
PF3D7_1104200	21	0	1	1990
PF3D7_1104400	40	0	1	1990
PF3D7_1105000	13	0	1	1990
PF3D7_1105100	9	0	1	1990
PF3D7_1105700	7	0	1	1990
PF3D7_1105800	10	0	1	1990
PF3D7_1106000	23	0	1	1990
PF3D7_1106700	1	0	1	1990
PF3D7_1107000	3	0	1	1990
PF3D7_1107100	1	0	1	1990
PF3D7_1107200	2	0	1	1990
PF3D7_1107300	20	0	1	1990
PF3D7_1107400	1	0	1	1990
PF3D7_1107500	2	0	1	1990
PF3D7_1107700	1	0	1	1990
PF3D7_1107800	12	0	1	1990
PF3D7_1108000	3	0	1	1990
PF3D7_1108200	1	0	1	1990
PF3D7_1108400	15	0	1	1990
PF3D7_1108500	2	0	1	1990
PF3D7_1108700	21	0	1	1990
PF3D7_1109900	5	0	1	1990
PF3D7_1110200	2	0	1	1990
PF3D7_1110400	14	0	1	1990
PF3D7_1110500	9	0	1	1990
PF3D7_1110700	4	0	1	1990
PF3D7_1111000	1	0	1	1990
PF3D7_1111100	7	0	1	1990
PF3D7_1111200	2	0	1	1990
PF3D7_1111500	2	0	1	1990
PF3D7_1111900	1	0	1	1990
PF3D7_1112500	6	0	1	1990
PF3D7_1113400	12	0	1	1990
PF3D7_1113700	1	0	1	1990
PF3D7_1114200	4	0	1	1990
PF3D7_1115200	1	0	1	1990
PF3D7_1115300	27	0	1	1990
PF3D7_1115400	26	0	1	1990
PF3D7_1115600	22	0	1	1990
PF3D7_1115700	11	0	1	1990
PF3D7_1116000	14	0	1	1990
PF3D7_1116100	1	0	1	1990
PF3D7_1116200	2	0	1	1990
PF3D7_1116300	1	0	1	1990
PF3D7_1116700	35	0	1	1990
PF3D7_1116800	13	0	1	1990
PF3D7_1117100	11	0	1	1990
PF3D7_1117700	29	0	1	1990
PF3D7_1118100	1	0	1	1990
PF3D7_1118200	16	0	1	1990
PF3D7_1118300	25	0	1	1990
PF3D7_1118500	27	0	1	1990
PF3D7_1119000	4	0	1	1990
PF3D7_1119200	2	0	1	1990
PF3D7_1119400	1	0	1	1990
PF3D7_1119800	2	0	1	1990
PF3D7_1119900	2	0	1	1990
PF3D7_1120000	26	0	1	1990
PF3D7_1120100	30	0	1	1990
PF3D7_1120500	5	0	1	1990
PF3D7_1121100	11	0	1	1990
PF3D7_1121600	19	0	1	1990
PF3D7_1121700	3	0	1	1990
PF3D7_1122300	1	0	1	1990
PF3D7_1122400	4	0	1	1990
PF3D7_1123100	2	0	1	1990
PF3D7_1123400	5	0	1	1990
PF3D7_1123500	5	0	1	1990
PF3D7_1123900	9	0	1	1990
PF3D7_1124300	7	0	1	1990
PF3D7_1124400	1	0	1	1990
PF3D7_1124700	9	0	1	1990
PF3D7_1124800	3	0	1	1990
PF3D7_1125400	1	0	1	1990
PF3D7_1125500	5	0	1	1990
PF3D7_1125800	1	0	1	1990
PF3D7_1125900	2	0	1	1990
PF3D7_1126000	18	0	1	1990
PF3D7_1126200	18	0	1	1990
PF3D7_1126500	1	0	1	1990
PF3D7_1126900	11	0	1	1990
PF3D7_1127000	3	0	1	1990
PF3D7_1127100	7	0	1	1990
PF3D7_1127800	2	0	1	1990
PF3D7_1128000	8	0	1	1990
PF3D7_1128100	4	0	1	1990
PF3D7_1128200	4	0	1	1990
PF3D7_1128400	5	0	1	1990
PF3D7_1128900	1	0	1	1990
PF3D7_1129000	2	0	1	1990
PF3D7_1129100	21	0	1	1990
PF3D7_1129200	11	0	1	1990
PF3D7_1129400	7	0	1	1990
PF3D7_1130100	7	0	1	1990
PF3D7_1130200	32	0	1	1990
PF3D7_1130400	25	0	1	1990
PF3D7_1130700	13	0	1	1990
PF3D7_1132200	22	0	1	1990
PF3D7_1132300	4	0	1	1990
PF3D7_1132600	2	0	1	1990
PF3D7_1132800	2	0	1	1990
PF3D7_1132900	1	0	1	1990
PF3D7_1133100	1	0	1	1990
PF3D7_1133200	9	0	1	1990
PF3D7_1133800	9	0	1	1990
PF3D7_1134100	14	0	1	1990
PF3D7_1134200	3	0	1	1990
PF3D7_1134300	1	0	1	1990
PF3D7_1134600	1	0	1	1990
PF3D7_1134800	9	0	1	1990
PF3D7_1134900	1	0	1	1990
PF3D7_1135100	9	0	1	1990
PF3D7_1135400	3	0	1	1990
PF3D7_1136200	1	0	1	1990
PF3D7_1136300	32	0	1	1990
PF3D7_1136400	3	0	1	1990
PF3D7_1136500	6	0	1	1990
PF3D7_1136600	3	0	1	1990
PF3D7_1136800	3	0	1	1990
PF3D7_1137400	2	0	1	1990
PF3D7_1138000	2	0	1	1990
PF3D7_1138100	2	0	1	1990
PF3D7_1139800	1	0	1	1990
PF3D7_1140100	5	0	1	1990
PF3D7_1140200	6	0	1	1990
PF3D7_1140400	2	0	1	1990
PF3D7_1140800	2	0	1	1990
PF3D7_1141300	6	0	1	1990
PF3D7_1141700	2	0	1	1990
PF3D7_1141800	1	0	1	1990
PF3D7_1142100	5	0	1	1990
PF3D7_1142400	6	0	1	1990
PF3D7_1142500	4	0	1	1990
PF3D7_1142600	5	0	1	1990
PF3D7_1143300	8	0	1	1990
PF3D7_1143400	1	0	1	1990
PF3D7_1144500	1	0	1	1990
PF3D7_1144600	1	0	1	1990
PF3D7_1144900	9	0	1	1990
PF3D7_1145100	9	0	1	1990
PF3D7_1145400	28	0	1	1990
PF3D7_1146000	5	0	1	1990
PF3D7_1147300	5	0	1	1990
PF3D7_1147900	2	0	1	1990
PF3D7_1148000	3	0	1	1990
PF3D7_1149100	2	0	1	1990
PF3D7_1149200	5	0	1	1990
PF3D7_1200700	2	0	1	1990
PF3D7_1201000	12	0	1	1990
PF3D7_1201900	2	0	1	1990
PF3D7_1202600	6	0	1	1990
PF3D7_1203200	1	0	1	1990
PF3D7_1203400	1	0	1	1990
PF3D7_1203700	19	0	1	1990
PF3D7_1203900	3	0	1	1990
PF3D7_1204300	15	0	1	1990
PF3D7_1205100	5	0	1	1990
PF3D7_1205500	5	0	1	1990
PF3D7_1205600	4	0	1	1990
PF3D7_1205700	3	0	1	1990
PF3D7_1205800	2	0	1	1990
PF3D7_1206000	1	0	1	1990
PF3D7_1206600	2	0	1	1990
PF3D7_1206800	4	0	1	1990
PF3D7_1207000	8	0	1	1990
PF3D7_1208100	4	0	1	1990
PF3D7_1208200	1	0	1	1990
PF3D7_1208300	4	0	1	1990
PF3D7_1208400	1	0	1	1990
PF3D7_1208600	2	0	1	1990
PF3D7_1208900	7	0	1	1990
PF3D7_1209200	7	0	1	1990
PF3D7_1209300	1	0	1	1990
PF3D7_1210100	4	0	1	1990
PF3D7_1210300	2	0	1	1990
PF3D7_1210600	1	0	1	1990
PF3D7_1211200	2	0	1	1990
PF3D7_1211300	3	0	1	1990
PF3D7_1211400	9	0	1	1990
PF3D7_1211600	2	0	1	1990
PF3D7_1211700	12	0	1	1990
PF3D7_1211800	3	0	1	1990
PF3D7_1211900	6	0	1	1990
PF3D7_1212000	6	0	1	1990
PF3D7_1212400	3	0	1	1990
PF3D7_1212900	8	0	1	1990
PF3D7_1213200	3	0	1	1990
PF3D7_1213700	5	0	1	1990
PF3D7_1213800	13	0	1	1990
PF3D7_1213900	6	0	1	1990
PF3D7_1215000	3	0	1	1990
PF3D7_1215100	1	0	1	1990
PF3D7_1215400	1	0	1	1990
PF3D7_1215900	1	0	1	1990
PF3D7_1216200	14	0	1	1990
PF3D7_1216300	3	0	1	1990
PF3D7_1216900	17	0	1	1990
PF3D7_1217200	1	0	1	1990
PF3D7_1217900	3	0	1	1990
PF3D7_1218200	6	0	1	1990
PF3D7_1218300	1	0	1	1990
PF3D7_1218400	1	0	1	1990
PF3D7_1218500	20	0	1	1990
PF3D7_1218600	9	0	1	1990
PF3D7_1219000	1	0	1	1990
PF3D7_1219100	59	0	1	1990
PF3D7_1219900	3	0	1	1990
PF3D7_1220900	18	0	1	1990
PF3D7_1221000	8	0	1	1990
PF3D7_1222100	3	0	1	1990
PF3D7_1223100	24	0	1	1990
PF3D7_1223200	2	0	1	1990
PF3D7_1223600	1	0	1	1990
PF3D7_1223700	1	0	1	1990
PF3D7_1224000	18	0	1	1990
PF3D7_1224100	2	0	1	1990
PF3D7_1224300	26	0	1	1990
PF3D7_1224500	3	0	1	1990
PF3D7_1224900	1	0	1	1990
PF3D7_1225200	9	0	1	1990
PF3D7_1225600	4	0	1	1990
PF3D7_1225700	4	0	1	1990
PF3D7_1225800	25	0	1	1990
PF3D7_1226300	15	0	1	1990
PF3D7_1226400	5	0	1	1990
PF3D7_1226600	11	0	1	1990
PF3D7_1226900	6	0	1	1990
PF3D7_1227100	3	0	1	1990
PF3D7_1227700	8	0	1	1990
PF3D7_1228300	1	0	1	1990
PF3D7_1228400	1	0	1	1990
PF3D7_1228600	42	0	1	1990
PF3D7_1228800	3	0	1	1990
PF3D7_1229000	1	0	1	1990
PF3D7_1229300	2	0	1	1990
PF3D7_1229500	30	0	1	1990
PF3D7_1230200	1	0	1	1990
PF3D7_1230500	1	0	1	1990
PF3D7_1230700	7	0	1	1990
PF3D7_1230800	2	0	1	1990
PF3D7_1230900	3	0	1	1990
PF3D7_1231100	17	0	1	1990
PF3D7_1231500	1	0	1	1990
PF3D7_1231600	3	0	1	1990
PF3D7_1231800	5	0	1	1990
PF3D7_1232100	15	0	1	1990
PF3D7_1232200	7	0	1	1990
PF3D7_1233600	5	0	1	1990
PF3D7_1233900	2	0	1	1990
PF3D7_1234300	2	0	1	1990
PF3D7_1234500	4	0	1	1990
PF3D7_1234800	22	0	1	1990
PF3D7_1234900	2	0	1	1990
PF3D7_1235300	4	0	1	1990
PF3D7_1235600	26	0	1	1990
PF3D7_1235700	13	0	1	1990
PF3D7_1236100	8	0	1	1990
PF3D7_1236300	1	0	1	1990
PF3D7_1237000	2	0	1	1990
PF3D7_1237100	1	0	1	1990
PF3D7_1237200	10	0	1	1990
PF3D7_1237400	4	0	1	1990
PF3D7_1237500	5	0	1	1990
PF3D7_1237700	3	0	1	1990
PF3D7_1238100	7	0	1	1990
PF3D7_1238500	4	0	1	1990
PF3D7_1238800	25	0	1	1990
PF3D7_1238900	1	0	1	1990
PF3D7_1239200	7	0	1	1990
PF3D7_1239700	11	0	1	1990
PF3D7_1239800	22	0	1	1990
PF3D7_1240900	1	0	1	1990
PF3D7_1241200	1	0	1	1990
PF3D7_1241500	1	0	1	1990
PF3D7_1241700	4	0	1	1990
PF3D7_1241900	6	0	1	1990
PF3D7_1242700	17	0	1	1990
PF3D7_1242800	12	0	1	1990
PF3D7_1243500	2	0	1	1990
PF3D7_1243600	6	0	1	1990
PF3D7_1244100	17	0	1	1990
PF3D7_1244200	2	0	1	1990
PF3D7_1244800	6	0	1	1990
PF3D7_1245100	3	0	1	1990
PF3D7_1245500	1	0	1	1990
PF3D7_1245600	1	0	1	1990
PF3D7_1245900	2	0	1	1990
PF3D7_1246200	18	0	1	1990
PF3D7_1246800	2	0	1	1990
PF3D7_1247200	1	0	1	1990
PF3D7_1247400	6	0	1	1990
PF3D7_1248200	3	0	1	1990
PF3D7_1248700	10	0	1	1990
PF3D7_1248900	10	0	1	1990
PF3D7_1249100	5	0	1	1990
PF3D7_1249300	5	0	1	1990
PF3D7_1249500	4	0	1	1990
PF3D7_1249800	13	0	1	1990
PF3D7_1250300	6	0	1	1990
PF3D7_1250800	3	0	1	1990
PF3D7_1251200	9	0	1	1990
PF3D7_1251300	3	0	1	1990
PF3D7_1251500	5	0	1	1990
PF3D7_1252100	61	0	1	1990
PF3D7_1253000	3	0	1	1990
PF3D7_1253400	7	0	1	1990
PF3D7_1302000	1	0	1	1990
PF3D7_1302100	8	0	1	1990
PF3D7_1302500	2	0	1	1990
PF3D7_1302800	25	0	1	1990
PF3D7_1303200	5	0	1	1990
PF3D7_1303400	1	0	1	1990
PF3D7_1303800	2	0	1	1990
PF3D7_1304000	3	0	1	1990
PF3D7_1304100	8	0	1	1990
PF3D7_1304500	10	0	1	1990
PF3D7_1304900	5	0	1	1990
PF3D7_1305000	4	0	1	1990
PF3D7_1305300	6	0	1	1990
PF3D7_1305900	1	0	1	1990
PF3D7_1306400	18	0	1	1990
PF3D7_1306600	5	0	1	1990
PF3D7_1306800	2	0	1	1990
PF3D7_1306900	2	0	1	1990
PF3D7_1307000	1	0	1	1990
PF3D7_1307200	2	0	1	1990
PF3D7_1307900	2	0	1	1990
PF3D7_1308200	31	0	1	1990
PF3D7_1308300	10	0	1	1990
PF3D7_1308900	3	0	1	1990
PF3D7_1309100	3	0	1	1990
PF3D7_1309200	2	0	1	1990
PF3D7_1309300	5	0	1	1990
PF3D7_1309400	3	0	1	1990
PF3D7_1309500	2	0	1	1990
PF3D7_1310300	1	0	1	1990
PF3D7_1310600	2	0	1	1990
PF3D7_1310800	6	0	1	1990
PF3D7_1311200	3	0	1	1990
PF3D7_1311400	4	0	1	1990
PF3D7_1311500	17	0	1	1990
PF3D7_1311900	26	0	1	1990
PF3D7_1312600	3	0	1	1990
PF3D7_1312700	7	0	1	1990
PF3D7_1312900	10	0	1	1990
PF3D7_1313000	1	0	1	1990
PF3D7_1313800	2	0	1	1990
PF3D7_1313900	1	0	1	1990
PF3D7_1314100	3	0	1	1990
PF3D7_1314500	1	0	1	1990
PF3D7_1314700	2	0	1	1990
PF3D7_1314900	3	0	1	1990
PF3D7_1315300	3	0	1	1990
PF3D7_1315400	5	0	1	1990
PF3D7_1315700	2	0	1	1990
PF3D7_1315900	8	0	1	1990
PF3D7_1316600	5	0	1	1990
PF3D7_1317000	6	0	1	1990
PF3D7_1317100	15	0	1	1990
PF3D7_1317400	2	0	1	1990
PF3D7_1317600	2	0	1	1990
PF3D7_1317800	13	0	1	1990
PF3D7_1317900	1	0	1	1990
PF3D7_1318400	17	0	1	1990
PF3D7_1319300	4	0	1	1990
PF3D7_1319400	4	0	1	1990
PF3D7_1320000	4	0	1	1990
PF3D7_1320600	8	0	1	1990
PF3D7_1320800	3	0	1	1990
PF3D7_1320900	1	0	1	1990
PF3D7_1321100	1	0	1	1990
PF3D7_1321500	1	0	1	1990
PF3D7_1321700	3	0	1	1990
PF3D7_1321900	5	0	1	1990
PF3D7_1322000	7	0	1	1990
PF3D7_1322200	15	0	1	1990
PF3D7_1322300	4	0	1	1990
PF3D7_1323100	16	0	1	1990
PF3D7_1323200	5	0	1	1990
PF3D7_1323400	6	0	1	1990
PF3D7_1323500	2	0	1	1990
PF3D7_1323600	5	0	1	1990
PF3D7_1323900	1	0	1	1990
PF3D7_1324100	1	0	1	1990
PF3D7_1324200	2	0	1	1990
PF3D7_1324400	1	0	1	1990
PF3D7_1324500	2	0	1	1990
PF3D7_1324700	2	0	1	1990
PF3D7_1324800	5	0	1	1990
PF3D7_1325000	3	0	1	1990
PF3D7_1325100	15	0	1	1990
PF3D7_1325400	5	0	1	1990
PF3D7_1325900	2	0	1	1990
PF3D7_1326100	4	0	1	1990
PF3D7_1326200	1	0	1	1990
PF3D7_1326400	4	0	1	1990
PF3D7_1327300	1	0	1	1990
PF3D7_1327400	1	0	1	1990
PF3D7_1327800	6	0	1	1990
PF3D7_1328100	7	0	1	1990
PF3D7_1328500	1	0	1	1990
PF3D7_1328900	2	0	1	1990
PF3D7_1329000	4	0	1	1990
PF3D7_1329100	14	0	1	1990
PF3D7_1329300	2	0	1	1990
PF3D7_1329500	1	0	1	1990
PF3D7_1329600	1	0	1	1990
PF3D7_1330500	1	0	1	1990
PF3D7_1330600	2	0	1	1990
PF3D7_1330800	8	0	1	1990
PF3D7_1331700	17	0	1	1990
PF3D7_1331800	11	0	1	1990
PF3D7_1332000	4	0	1	1990
PF3D7_1332200	3	0	1	1990
PF3D7_1332300	2	0	1	1990
PF3D7_1332400	1	0	1	1990
PF3D7_1332600	5	0	1	1990
PF3D7_1332800	6	0	1	1990
PF3D7_1332900	28	0	1	1990
PF3D7_1333000	10	0	1	1990
PF3D7_1333400	5	0	1	1990
PF3D7_1333600	2	0	1	1990
PF3D7_1334100	3	0	1	1990
PF3D7_1334500	7	0	1	1990
PF3D7_1334800	5	0	1	1990
PF3D7_1335100	19	0	1	1990
PF3D7_1335400	18	0	1	1990
PF3D7_1336800	3	0	1	1990
PF3D7_1336900	3	0	1	1990
PF3D7_1337200	6	0	1	1990
PF3D7_1337300	1	0	1	1990
PF3D7_1338100	11	0	1	1990
PF3D7_1338200	23	0	1	1990
PF3D7_1338300	12	0	1	1990
PF3D7_1338700	3	0	1	1990
PF3D7_1339800	1	0	1	1990
PF3D7_1340300	2	0	1	1990
PF3D7_1340600	13	0	1	1990
PF3D7_1341200	12	0	1	1990
PF3D7_1341300	12	0	1	1990
PF3D7_1341900	5	0	1	1990
PF3D7_1342000	11	0	1	1990
PF3D7_1342100	6	0	1	1990
PF3D7_1342400	2	0	1	1990
PF3D7_1342600	4	0	1	1990
PF3D7_1342800	5	0	1	1990
PF3D7_1343300	5	0	1	1990
PF3D7_1343700	13	0	1	1990
PF3D7_1343900	6	0	1	1990
PF3D7_1344300	1	0	1	1990
PF3D7_1344700	1	0	1	1990
PF3D7_1344900	1	0	1	1990
PF3D7_1345100	9	0	1	1990
PF3D7_1345400	1	0	1	1990
PF3D7_1345700	10	0	1	1990
PF3D7_1345800	7	0	1	1990
PF3D7_1345900	5	0	1	1990
PF3D7_1346300	17	0	1	1990
PF3D7_1346400	3	0	1	1990
PF3D7_1347100	1	0	1	1990
PF3D7_1347200	1	0	1	1990
PF3D7_1347500	28	0	1	1990
PF3D7_1347700	2	0	1	1990
PF3D7_1349100	2	0	1	1990
PF3D7_1349200	23	0	1	1990
PF3D7_1349500	5	0	1	1990
PF3D7_1349600	2	0	1	1990
PF3D7_1350100	22	0	1	1990
PF3D7_1350200	4	0	1	1990
PF3D7_1350500	1	0	1	1990
PF3D7_1351000	1	0	1	1990
PF3D7_1351100	1	0	1	1990
PF3D7_1351400	7	0	1	1990
PF3D7_1351700	4	0	1	1990
PF3D7_1351800	6	0	1	1990
PF3D7_1352200	4	0	1	1990
PF3D7_1352500	3	0	1	1990
PF3D7_1352700	12	0	1	1990
PF3D7_1353000	1	0	1	1990
PF3D7_1353300	2	0	1	1990
PF3D7_1353400	1	0	1	1990
PF3D7_1353800	10	0	1	1990
PF3D7_1353900	14	0	1	1990
PF3D7_1354300	7	0	1	1990
PF3D7_1354500	18	0	1	1990
PF3D7_1354600	2	0	1	1990
PF3D7_1355100	18	0	1	1990
PF3D7_1355500	14	0	1	1990
PF3D7_1355700	4	0	1	1990
PF3D7_1355800	1	0	1	1990
PF3D7_1356100	3	0	1	1990
PF3D7_1356300	5	0	1	1990
PF3D7_1356800	2	0	1	1990
PF3D7_1356900	1	0	1	1990
PF3D7_1357500	2	0	1	1990
PF3D7_1357700	4	0	1	1990
PF3D7_1357800	34	0	1	1990
PF3D7_1357900	5	0	1	1990
PF3D7_1358200	5	0	1	1990
PF3D7_1358500	6	0	1	1990
PF3D7_1358800	14	0	1	1990
PF3D7_1358900	7	0	1	1990
PF3D7_1359000	2	0	1	1990
PF3D7_1359300	2	0	1	1990
PF3D7_1359600	2	0	1	1990
PF3D7_1360400	3	0	1	1990
PF3D7_1360800	53	0	1	1990
PF3D7_1360900	6	0	1	1990
PF3D7_1361000	3	0	1	1990
PF3D7_1361100	12	0	1	1990
PF3D7_1361200	3	0	1	1990
PF3D7_1361600	2	0	1	1990
PF3D7_1361800	59	0	1	1990
PF3D7_1361900	29	0	1	1990
PF3D7_1362200	11	0	1	1990
PF3D7_1363100	1	0	1	1990
PF3D7_1363200	1	0	1	1990
PF3D7_1363400	7	0	1	1990
PF3D7_1364100	17	0	1	1990
PF3D7_1364500	4	0	1	1990
PF3D7_1364800	2	0	1	1990
PF3D7_1365500	6	0	1	1990
PF3D7_1365700	1	0	1	1990
PF3D7_1366000	1	0	1	1990
PF3D7_1366300	5	0	1	1990
PF3D7_1366400	4	0	1	1990
PF3D7_1366500	14	0	1	1990
PF3D7_1366600	4	0	1	1990
PF3D7_1366900	11	0	1	1990
PF3D7_1367000	9	0	1	1990
PF3D7_1367100	3	0	1	1990
PF3D7_1367400	1	0	1	1990
PF3D7_1367600	6	0	1	1990
PF3D7_1367700	11	0	1	1990
PF3D7_1368100	17	0	1	1990
PF3D7_1368200	19	0	1	1990
PF3D7_1368300	2	0	1	1990
PF3D7_1368400	1	0	1	1990
PF3D7_1368600	2	0	1	1990
PF3D7_1368800	1	0	1	1990
PF3D7_1369400	4	0	1	1990
PF3D7_1369500	21	0	1	1990
PF3D7_1369700	10	0	1	1990
PF3D7_1370300	2	0	1	1990
PF3D7_1371800	1	0	1	1990
PF3D7_1401000	1	0	1	1990
PF3D7_1401100	1	0	1	1990
PF3D7_1401600	6	0	1	1990
PF3D7_1401800	3	0	1	1990
PF3D7_1402300	22	0	1	1990
PF3D7_1402500	1	0	1	1990
PF3D7_1402700	4	0	1	1990
PF3D7_1403100	7	0	1	1990
PF3D7_1404000	1	0	1	1990
PF3D7_1404100	6	0	1	1990
PF3D7_1404900	17	0	1	1990
PF3D7_1405600	8	0	1	1990
PF3D7_1405800	3	0	1	1990
PF3D7_1405900	5	0	1	1990
PF3D7_1406000	3	0	1	1990
PF3D7_1406100	1	0	1	1990
PF3D7_1406200	17	0	1	1990
PF3D7_1406300	8	0	1	1990
PF3D7_1406700	2	0	1	1990
PF3D7_1407100	12	0	1	1990
PF3D7_1407500	3	0	1	1990
PF3D7_1407800	44	0	1	1990
PF3D7_1407900	29	0	1	1990
PF3D7_1408100	38	0	1	1990
PF3D7_1408500	1	0	1	1990
PF3D7_1408600	23	0	1	1990
PF3D7_1408700	6	0	1	1990
PF3D7_1409300	5	0	1	1990
PF3D7_1409600	1	0	1	1990
PF3D7_1409800	17	0	1	1990
PF3D7_1410200	13	0	1	1990
PF3D7_1410300	4	0	1	1990
PF3D7_1410400	34	0	1	1990
PF3D7_1410600	25	0	1	1990
PF3D7_1410700	5	0	1	1990
PF3D7_1411200	1	0	1	1990
PF3D7_1412100	6	0	1	1990
PF3D7_1412300	9	0	1	1990
PF3D7_1412500	8	0	1	1990
PF3D7_1412600	5	0	1	1990
PF3D7_1412700	4	0	1	1990
PF3D7_1412800	2	0	1	1990
PF3D7_1414000	4	0	1	1990
PF3D7_1414100	1	0	1	1990
PF3D7_1414300	3	0	1	1990
PF3D7_1414400	17	0	1	1990
PF3D7_1414600	2	0	1	1990
PF3D7_1414800	10	0	1	1990
PF3D7_1415300	5	0	1	1990
PF3D7_1415800	2	0	1	1990
PF3D7_1416500	17	0	1	1990
PF3D7_1416900	5	0	1	1990
PF3D7_1417200	6	0	1	1990
PF3D7_1417500	16	0	1	1990
PF3D7_1417600	7	0	1	1990
PF3D7_1417700	7	0	1	1990
PF3D7_1417800	22	0	1	1990
PF3D7_1418000	3	0	1	1990
PF3D7_1419000	5	0	1	1990
PF3D7_1419100	1	0	1	1990
PF3D7_1419300	6	0	1	1990
PF3D7_1419400	6	0	1	1990
PF3D7_1419800	29	0	1	1990
PF3D7_1419900	2	0	1	1990
PF3D7_1420000	2	0	1	1990
PF3D7_1420200	3	0	1	1990
PF3D7_1420400	10	0	1	1990
PF3D7_1420600	7	0	1	1990
PF3D7_1420700	43	0	1	1990
PF3D7_1422300	1	0	1	1990
PF3D7_1422400	2	0	1	1990
PF3D7_1422700	3	0	1	1990
PF3D7_1422800	4	0	1	1990
PF3D7_1423300	4	0	1	1990
PF3D7_1423700	10	0	1	1990
PF3D7_1424400	11	0	1	1990
PF3D7_1425200	2	0	1	1990
PF3D7_1425700	3	0	1	1990
PF3D7_1425900	5	0	1	1990
PF3D7_1426000	5	0	1	1990
PF3D7_1426100	5	0	1	1990
PF3D7_1426200	9	0	1	1990
PF3D7_1426700	7	0	1	1990
PF3D7_1426800	1	0	1	1990
PF3D7_1427300	9	0	1	1990
PF3D7_1427500	5	0	1	1990
PF3D7_1427900	18	0	1	1990
PF3D7_1428300	10	0	1	1990
PF3D7_1428800	2	0	1	1990
PF3D7_1428900	4	0	1	1990
PF3D7_1429400	2	0	1	1990
PF3D7_1429800	11	0	1	1990
PF3D7_1430100	1	0	1	1990
PF3D7_1431300	2	0	1	1990
PF3D7_1431700	12	0	1	1990
PF3D7_1432000	1	0	1	1990
PF3D7_1432100	1	0	1	1990
PF3D7_1432500	1	0	1	1990
PF3D7_1432800	1	0	1	1990
PF3D7_1433300	3	0	1	1990
PF3D7_1433500	8	0	1	1990
PF3D7_1434000	1	0	1	1990
PF3D7_1434100	4	0	1	1990
PF3D7_1434200	14	0	1	1990
PF3D7_1434300	42	0	1	1990
PF3D7_1434600	7	0	1	1990
PF3D7_1434800	8	0	1	1990
PF3D7_1435500	2	0	1	1990
PF3D7_1435700	2	0	1	1990
PF3D7_1436000	17	0	1	1990
PF3D7_1436200	2	0	1	1990
PF3D7_1436300	13	0	1	1990
PF3D7_1436600	5	0	1	1990
PF3D7_1436800	2	0	1	1990
PF3D7_1437200	12	0	1	1990
PF3D7_1437700	2	0	1	1990
PF3D7_1437900	25	0	1	1990
PF3D7_1438000	8	0	1	1990
PF3D7_1438100	1	0	1	1990
PF3D7_1438500	9	0	1	1990
PF3D7_1438600	4	0	1	1990
PF3D7_1438700	10	0	1	1990
PF3D7_1438900	7	0	1	1990
PF3D7_1439100	1	0	1	1990
PF3D7_1439700	2	0	1	1990
PF3D7_1439800	17	0	1	1990
PF3D7_1439900	23	0	1	1990
PF3D7_1440100	7	0	1	1990
PF3D7_1440400	2	0	1	1990
PF3D7_1440700	2	0	1	1990
PF3D7_1441100	4	0	1	1990
PF3D7_1441200	30	0	1	1990
PF3D7_1441400	9	0	1	1990
PF3D7_1442100	7	0	1	1990
PF3D7_1442300	15	0	1	1990
PF3D7_1442500	2	0	1	1990
PF3D7_1442900	7	0	1	1990
PF3D7_1443000	1	0	1	1990
PF3D7_1443100	2	0	1	1990
PF3D7_1443400	5	0	1	1990
PF3D7_1443500	1	0	1	1990
PF3D7_1443900	11	0	1	1990
PF3D7_1445000	2	0	1	1990
PF3D7_1445100	15	0	1	1990
PF3D7_1445200	8	0	1	1990
PF3D7_1445700	2	0	1	1990
PF3D7_1445900	19	0	1	1990
PF3D7_1446600	6	0	1	1990
PF3D7_1446700	3	0	1	1990
PF3D7_1447000	18	0	1	1990
PF3D7_1447800	7	0	1	1990
PF3D7_1448000	3	0	1	1990
PF3D7_1448600	7	0	1	1990
PF3D7_1449100	3	0	1	1990
PF3D7_1449700	1	0	1	1990
PF3D7_1450100	8	0	1	1990
PF3D7_1450400	4	0	1	1990
PF3D7_1450500	2	0	1	1990
PF3D7_1451100	70	0	1	1990
PF3D7_1451200	5	0	1	1990
PF3D7_1451500	2	0	1	1990
PF3D7_1451700	1	0	1	1990
PF3D7_1451800	10	0	1	1990
PF3D7_1452000	14	0	1	1990
PF3D7_1452200	1	0	1	1990
PF3D7_1452400	4	0	1	1990
PF3D7_1452500	2	0	1	1990
PF3D7_1453000	1	0	1	1990
PF3D7_1453700	17	0	1	1990
PF3D7_1453800	13	0	1	1990
PF3D7_1454200	4	0	1	1990
PF3D7_1454700	14	0	1	1990
PF3D7_1455200	3	0	1	1990
PF3D7_1455300	2	0	1	1990
PF3D7_1455500	10	0	1	1990
PF3D7_1455700	2	0	1	1990
PF3D7_1456500	15	0	1	1990
PF3D7_1456700	4	0	1	1990
PF3D7_1456800	8	0	1	1990
PF3D7_1457200	19	0	1	1990
PF3D7_1457300	16	0	1	1990
PF3D7_1459000	9	0	1	1990
PF3D7_1459600	5	0	1	1990
PF3D7_1459700	2	0	1	1990
PF3D7_1460300	1	0	1	1990
PF3D7_1460500	3	0	1	1990
PF3D7_1460600	4	0	1	1990
PF3D7_1460700	10	0	1	1990
PF3D7_1461200	1	0	1	1990
PF3D7_1461400	2	0	1	1990
PF3D7_1461600	4	0	1	1990
PF3D7_1461900	25	0	1	1990
PF3D7_1462100	1	0	1	1990
PF3D7_1462300	4	0	1	1990
PF3D7_1462800	66	0	1	1990
PF3D7_1463200	8	0	1	1990
PF3D7_1463300	8	0	1	1990
PF3D7_1463400	1	0	1	1990
PF3D7_1463900	1	0	1	1990
PF3D7_1464200	1	0	1	1990
PF3D7_1464500	1	0	1	1990
PF3D7_1464600	12	0	1	1990
PF3D7_1464700	8	0	1	1990
PF3D7_1465300	2	0	1	1990
PF3D7_1465900	14	0	1	1990
PF3D7_1466100	3	0	1	1990
PF3D7_1466300	35	0	1	1990
PF3D7_1466400	4	0	1	1990
PF3D7_1466800	1	0	1	1990
PF3D7_1466900	6	0	1	1990
PF3D7_1467900	1	0	1	1990
PF3D7_1468100	41	0	1	1990
PF3D7_1468700	37	0	1	1990
PF3D7_1468800	2	0	1	1990
PF3D7_1468900	14	0	1	1990
PF3D7_1469200	1	0	1	1990
PF3D7_1469800	1	0	1	1990
PF3D7_1469900	1	0	1	1990
PF3D7_1470900	10	0	1	1990
PF3D7_1471000	3	0	1	1990
PF3D7_1471100	19	0	1	1990
PF3D7_1471400	4	0	1	1990
PF3D7_1472000	1	0	1	1990
PF3D7_1472200	3	0	1	1990
PF3D7_1472600	5	0	1	1990
PF3D7_1473100	3	0	1	1990
PF3D7_1473200	5	0	1	1990
PF3D7_1473700	4	0	1	1990
PF3D7_1474500	9	0	1	1990
PF3D7_1474800	19	0	1	1990
PF3D7_1474900	1	0	1	1990
PF3D7_1475600	3	0	1	1990
PF3D7_1476300	4	0	1	1990
Q00013	14	0	1	1990
Q01469	2	0	1	1990
Q01518	2	0	1	1990
Q04656	1	0	1	1990
Q04760	3	0	1	1990
Q06323	6	0	1	1990
Q06830	10	0	1	1990
Q08495	13	0	1	1990
Q08AM6	1	0	1	1990
Q13200	4	0	1	1990
Q13228	65	0	1	1990
Q14964	5	0	1	1990
Q14974	3	0	1	1990
Q14CZ8	1	0	1	1990
Q15008	2	0	1	1990
Q15181	2	0	1	1990
Q53FA7	1	0	1	1990
Q5QPM7;Q5QPM9;Q92530	1	0	1	1990
Q5T4S7	2	0	1	1990
Q5T6H7;Q9NQW7	2	0	1	1990
Q5TBG5;Q99436	1	0	1	1990
Q5XPI4	4	0	1	1990
Q6UWP2	2	0	1	1990
Q86VP6	6	0	1	1990
Q8IUE6	1	0	1	1990
Q8IVF2	1	0	1	1990
Q8IZ83	2	0	1	1990
Q8NCW5	4	0	1	1990
Q8TB52	1	0	1	1990
Q8WUM4	2	0	1	1990
Q92905	1	0	1	1990
Q93008	5	0	1	1990
Q93034	1	0	1	1990
Q96KS0	1	0	1	1990
Q96P70	2	0	1	1990
Q99683	1	0	1	1990
Q99832	5	0	1	1990
Q9BRF8	3	0	1	1990
Q9BS40	1	0	1	1990
Q9BVM4	1	0	1	1990
Q9C0C9	2	0	1	1990
Q9GZP4;X6R8S9;X6RHB9	1	0	1	1990
Q9GZT8	6	0	1	1990
Q9H2M9	1	0	1	1990
Q9NRV9	1	0	1	1990
Q9NYP9	1	0	1	1990
Q9NZD4	1	0	1	1990
Q9UQ13;X6RI37	1	0	1	1990
Q9Y3I1	3	0	1	1990
