# Supplementary material for: Chemoproteomics validates selective targeting of Plasmodium M1 alanyl aminopeptidase as an antimalarial strategy
Source: eLife. 2024 Jul 8;13:RP92990. doi: 10.7554/eLife.92990 (PMC11230628; doi:10.7554/eLife.92990)
Supplement: Figure 4—source data 3. [file elife-92990-fig4-data3.xlsx]

## Sheet: Data S5
Data S5. Related to Fig. 4. Experiment 1 LiP-MS GO molecular function enrichment analysis
	GO.ID	Term	Annotated	Significant	Expected	Enrichment	pvalue
1	GO:0004298	threonine-type endopeptidase activity	14	11	0.9	12.2222	1.2e-11
2	GO:0004177	aminopeptidase activity	6	4	0.38	10.5263	0.00021
3	GO:0004190	aspartic-type endopeptidase activity	7	3	0.45	6.66667	0.00734
4	GO:0008237	metallopeptidase activity	10	3	0.64	4.6875	0.02185
5	GO:0016667	oxidoreductase activity, acting on a sulfur group of donors	8	2	0.51	3.92157	0.08802
6	GO:0000287	magnesium ion binding	15	2	0.96	2.08333	0.24841
7	GO:0004175	endopeptidase activity	39	16	2.49	6.4257	0.25753
8	GO:0016651	oxidoreductase activity, acting on NAD(P)H	5	1	0.32	3.125	0.28176
9	GO:0050660	flavin adenine dinucleotide binding	5	1	0.32	3.125	0.28176
10	GO:0016835	carbon-oxygen lyase activity	5	1	0.32	3.125	0.28176
11	GO:0019205	nucleobase-containing compound kinase activity	5	1	0.32	3.125	0.28176
12	GO:0016763	transferase activity, transferring pentosyl groups	6	1	0.38	2.63158	0.32786
13	GO:0042803	protein homodimerization activity	7	1	0.45	2.22222	0.37103
14	GO:0019842	vitamin binding	7	1	0.45	2.22222	0.37103
15	GO:0009055	electron transfer activity	8	1	0.51	1.96078	0.41146
16	GO:0004722	protein serine/threonine phosphatase activity	8	1	0.51	1.96078	0.41146
17	GO:0016776	phosphotransferase activity, phosphate group as acceptor	8	1	0.51	1.96078	0.41146
18	GO:0016853	isomerase activity	30	3	1.92	1.5625	0.43556
19	GO:0016209	antioxidant activity	9	1	0.58	1.72414	0.44932
20	GO:0015267	channel activity	9	1	0.58	1.72414	0.44932
21	GO:0016810	hydrolase activity, acting on carbon-nitrogen (but not peptide) bonds	9	1	0.58	1.72414	0.44932
22	GO:0003755	peptidyl-prolyl cis-trans isomerase activity	9	1	0.58	1.72414	0.44932
23	GO:0016830	carbon-carbon lyase activity	10	1	0.64	1.5625	0.48477
24	GO:0003779	actin binding	11	1	0.7	1.42857	0.51796
25	GO:0016765	transferase activity, transferring alkyl or aryl (other than methyl) groups	12	1	0.77	1.2987	0.54904
26	GO:0016879	ligase activity, forming carbon-nitrogen bonds	12	1	0.77	1.2987	0.54904
27	GO:0046789	host cell surface receptor binding	12	1	0.77	1.2987	0.54904
28	GO:0003743	translation initiation factor activity	31	2	1.98	1.0101	0.60107
29	GO:0015078	proton transmembrane transporter activity	15	1	0.96	1.04167	0.63087
30	GO:0051082	unfolded protein binding	33	2	2.11	0.947867	0.6358
31	GO:0050662	coenzyme binding	22	2	1.41	1.41844	0.69481
32	GO:0098772	molecular function regulator	38	2	2.43	0.823045	0.71234
33	GO:0008234	cysteine-type peptidase activity	21	1	1.34	0.746269	0.75302
34	GO:0046914	transition metal ion binding	60	3	3.84	0.78125	0.75304
35	GO:0008135	translation factor activity, RNA binding	45	2	2.88	0.694444	0.8738
36	GO:0016491	oxidoreductase activity	48	3	3.07	0.977199	0.90709
37	GO:0008270	zinc ion binding	53	2	3.39	0.589971	0.91627
38	GO:0003924	GTPase activity	44	1	2.81	0.355872	0.94797
39	GO:0016788	hydrolase activity, acting on ester bonds	60	2	3.84	0.520833	0.94805
40	GO:0005525	GTP binding	53	1	3.39	0.294985	0.97193
41	GO:0046872	metal ion binding	123	5	7.87	0.635324	0.9848
42	GO:0043169	cation binding	128	5	8.19	0.610501	0.98742
43	GO:0016787	hydrolase activity	286	24	18.29	1.31219	0.99668
44	GO:0008144	drug binding	218	5	13.94	0.35868	0.99927
45	GO:0003677	DNA binding	110	1	7.03	0.142248	0.99949
46	GO:0016462	pyrophosphatase activity	134	2	8.57	0.233372	0.99987
47	GO:0016818	hydrolase activity, acting on acid anhydrides, in phosphorus-containing anhydrides	135	2	8.63	0.23175	0.99988
48	GO:1901265	nucleoside phosphate binding	298	5	19.06	0.262329	0.99994
49	GO:0097367	carbohydrate derivative binding	267	4	17.08	0.234192	0.99998
50	GO:0043168	anion binding	284	6	18.16	0.330396	0.99998
51	GO:0003824	catalytic activity	607	36	38.82	0.927357	0.99998
52	GO:0017076	purine nucleotide binding	264	4	16.88	0.236967	0.99999
53	GO:0005524	ATP binding	207	3	13.24	0.226586	0.99999
54	GO:0005515	protein binding	417	12	26.67	0.449944	0.99999
55	GO:0032555	purine ribonucleotide binding	263	4	16.82	0.237812	0.99999
56	GO:0032559	adenyl ribonucleotide binding	211	3	13.49	0.222387	0.99999
57	GO:0032553	ribonucleotide binding	265	4	16.95	0.235988	0.99999
58	GO:0030554	adenyl nucleotide binding	212	3	13.56	0.221239	0.99999
59	GO:0036094	small molecule binding	306	6	19.57	0.306592	1
60	GO:0035639	purine ribonucleoside triphosphate binding	259	4	16.56	0.241546	1
61	GO:0000166	nucleotide binding	298	5	19.06	0.262329	1
62	GO:0043167	ion binding	392	10	25.07	0.398883	1
63	GO:1901363	heterocyclic compound binding	568	9	36.33	0.247729	1
64	GO:0097159	organic cyclic compound binding	568	9	36.33	0.247729	1
65	GO:0003676	nucleic acid binding	364	3	23.28	0.128866	1
66	GO:0003674	molecular_function	1332	44	85.19	0.516493	1
67	GO:0016740	transferase activity	188	3	12.02	0.249584	1
68	GO:0008324	cation transmembrane transporter activity	25	1	1.6	0.625	1
69	GO:0019001	guanyl nucleotide binding	53	1	3.39	0.294985	1
70	GO:0001882	nucleoside binding	53	1	3.39	0.294985	1
71	GO:0030234	enzyme regulator activity	31	1	1.98	0.505051	1
72	GO:0001883	purine nucleoside binding	53	1	3.39	0.294985	1
73	GO:0046983	protein dimerization activity	18	1	1.15	0.869565	1
74	GO:0048037	cofactor binding	31	2	1.98	1.0101	1
75	GO:0016301	kinase activity	47	1	3.01	0.332226	1
76	GO:0042802	identical protein binding	7	1	0.45	2.22222	1
77	GO:0015318	inorganic molecular entity transmembrane transporter activity	30	1	1.92	0.520833	1
78	GO:0016874	ligase activity	50	1	3.2	0.3125	1
79	GO:0003723	RNA binding	198	2	12.66	0.157978	1
80	GO:0016757	transferase activity, transferring glycosyl groups	8	1	0.51	1.96078	1
81	GO:0070001	aspartic-type peptidase activity	7	3	0.45	6.66667	1
82	GO:0070003	threonine-type peptidase activity	14	11	0.9	12.2222	1
83	GO:0140096	catalytic activity, acting on a protein	153	21	9.78	2.14724	1
84	GO:0046812	host cell surface binding	19	1	1.22	0.819672	1
85	GO:0016829	lyase activity	17	2	1.09	1.83486	1
86	GO:0008233	peptidase activity	68	19	4.35	4.36782	1
87	GO:0005215	transporter activity	52	2	3.33	0.600601	1
88	GO:0090079	translation regulator activity, nucleic acid binding	46	2	2.94	0.680272	1
89	GO:0022857	transmembrane transporter activity	46	2	2.94	0.680272	1
90	GO:0008235	metalloexopeptidase activity	5	2	0.32	6.25	1
91	GO:0004721	phosphoprotein phosphatase activity	14	1	0.9	1.11111	1
92	GO:0070011	peptidase activity, acting on L-amino acid peptides	66	19	4.22	4.50237	1
93	GO:0008238	exopeptidase activity	7	4	0.45	8.88889	1
94	GO:0032561	guanyl ribonucleotide binding	53	1	3.39	0.294985	1
95	GO:0016791	phosphatase activity	22	1	1.41	0.70922	1
96	GO:0016772	transferase activity, transferring phosphorus-containing groups	96	1	6.14	0.162866	1
97	GO:0032549	ribonucleoside binding	53	1	3.39	0.294985	1
98	GO:0016817	hydrolase activity, acting on acid anhydrides	135	2	8.63	0.23175	1
99	GO:0032550	purine ribonucleoside binding	53	1	3.39	0.294985	1
100	GO:0016860	intramolecular oxidoreductase activity	10	1	0.64	1.5625	1
101	GO:0042578	phosphoric ester hydrolase activity	24	1	1.53	0.653595	1
102	GO:0005488	binding	978	21	62.55	0.335731	1
103	GO:0022890	inorganic cation transmembrane transporter activity	24	1	1.53	0.653595	1
104	GO:0045182	translation regulator activity	46	2	2.94	0.680272	1
105	GO:0017111	nucleoside-triphosphatase activity	125	1	7.99	0.125156	1
106	GO:0004222	metalloendopeptidase activity	5	1	0.32	3.125	1
107	GO:0015075	ion transmembrane transporter activity	32	1	2.05	0.487805	1
108	GO:0022803	passive transmembrane transporter activity	9	1	0.58	1.72414	1
109	GO:0015077	monovalent inorganic cation transmembrane transporter activity	16	1	1.02	0.980392	1
110	GO:0016859	cis-trans isomerase activity	9	1	0.58	1.72414	1
111	GO:0008092	cytoskeletal protein binding	18	1	1.15	0.869565	1
112	GO:0002161	aminoacyl-tRNA editing activity	5	0	0.32	0	1
113	GO:0003678	DNA helicase activity	12	0	0.77	0	1
114	GO:0003682	chromatin binding	7	0	0.45	0	1
115	GO:0003690	double-stranded DNA binding	12	0	0.77	0	1
116	GO:0003700	DNA-binding transcription factor activity	13	0	0.83	0	1
117	GO:0003712	transcription coregulator activity	5	0	0.32	0	1
118	GO:0003729	mRNA binding	64	0	4.09	0	1
119	GO:0003735	structural constituent of ribosome	75	0	4.8	0	1
120	GO:0003746	translation elongation factor activity	13	0	0.83	0	1
121	GO:0003756	protein disulfide isomerase activity	6	0	0.38	0	1
122	GO:0003774	motor activity	9	0	0.58	0	1
123	GO:0003887	DNA-directed DNA polymerase activity	7	0	0.45	0	1
124	GO:0003899	DNA-directed 5'-3' RNA polymerase activity	23	0	1.47	0	1
125	GO:0004386	helicase activity	29	0	1.85	0	1
126	GO:0004467	long-chain fatty acid-CoA ligase activity	5	0	0.32	0	1
127	GO:0004518	nuclease activity	24	0	1.53	0	1
128	GO:0004519	endonuclease activity	12	0	0.77	0	1
129	GO:0004521	endoribonuclease activity	6	0	0.38	0	1
130	GO:0004527	exonuclease activity	6	0	0.38	0	1
131	GO:0004540	ribonuclease activity	11	0	0.7	0	1
132	GO:0004672	protein kinase activity	28	0	1.79	0	1
133	GO:0004674	protein serine/threonine kinase activity	19	0	1.22	0	1
134	GO:0004812	aminoacyl-tRNA ligase activity	21	0	1.34	0	1
135	GO:0004842	ubiquitin-protein transferase activity	14	0	0.9	0	1
136	GO:0004843	thiol-dependent ubiquitin-specific protease activity	8	0	0.51	0	1
137	GO:0005085	guanyl-nucleotide exchange factor activity	6	0	0.38	0	1
138	GO:0005096	GTPase activator activity	6	0	0.38	0	1
139	GO:0005198	structural molecule activity	92	0	5.88	0	1
140	GO:0005200	structural constituent of cytoskeleton	8	0	0.51	0	1
141	GO:0005216	ion channel activity	6	0	0.38	0	1
142	GO:0005484	SNAP receptor activity	7	0	0.45	0	1
143	GO:0005509	calcium ion binding	22	0	1.41	0	1
144	GO:0008047	enzyme activator activity	14	0	0.9	0	1
145	GO:0008080	N-acetyltransferase activity	5	0	0.32	0	1
146	GO:0008094	DNA-dependent ATPase activity	18	0	1.15	0	1
147	GO:0008168	methyltransferase activity	32	0	2.05	0	1
148	GO:0008170	N-methyltransferase activity	8	0	0.51	0	1
149	GO:0008173	RNA methyltransferase activity	11	0	0.7	0	1
150	GO:0008236	serine-type peptidase activity	5	0	0.32	0	1
151	GO:0008276	protein methyltransferase activity	6	0	0.38	0	1
152	GO:0008408	3'-5' exonuclease activity	5	0	0.32	0	1
153	GO:0008509	anion transmembrane transporter activity	8	0	0.51	0	1
154	GO:0008536	Ran GTPase binding	8	0	0.51	0	1
155	GO:0008757	S-adenosylmethionine-dependent methyltransferase activity	17	0	1.09	0	1
156	GO:0009678	pyrophosphate hydrolysis-driven proton transmembrane transporter activity	10	0	0.64	0	1
157	GO:0015291	secondary active transmembrane transporter activity	5	0	0.32	0	1
158	GO:0015399	primary active transmembrane transporter activity	21	0	1.34	0	1
159	GO:0015631	tubulin binding	6	0	0.38	0	1
160	GO:0015645	fatty acid ligase activity	5	0	0.32	0	1
161	GO:0016405	CoA-ligase activity	7	0	0.45	0	1
162	GO:0016407	acetyltransferase activity	5	0	0.32	0	1
163	GO:0016410	N-acyltransferase activity	6	0	0.38	0	1
164	GO:0016614	oxidoreductase activity, acting on CH-OH group of donors	8	0	0.51	0	1
165	GO:0016616	oxidoreductase activity, acting on the CH-OH group of donors, NAD or NADP as acceptor	8	0	0.51	0	1
166	GO:0016741	transferase activity, transferring one-carbon groups	34	0	2.17	0	1
167	GO:0016746	transferase activity, transferring acyl groups	11	0	0.7	0	1
168	GO:0016747	transferase activity, transferring acyl groups other than amino-acyl groups	7	0	0.45	0	1
169	GO:0016773	phosphotransferase activity, alcohol group as acceptor	42	0	2.69	0	1
170	GO:0016779	nucleotidyltransferase activity	40	0	2.56	0	1
171	GO:0016796	exonuclease activity, active with either ribo- or deoxyribonucleic acids and producing 5'-phosphomonoesters	5	0	0.32	0	1
172	GO:0016811	hydrolase activity, acting on carbon-nitrogen (but not peptide) bonds, in linear amides	5	0	0.32	0	1
173	GO:0016825	hydrolase activity, acting on acid phosphorus-nitrogen bonds	5	0	0.32	0	1
174	GO:0016831	carboxy-lyase activity	6	0	0.38	0	1
175	GO:0016864	intramolecular oxidoreductase activity, transposing S-S bonds	6	0	0.38	0	1
176	GO:0016866	intramolecular transferase activity	7	0	0.45	0	1
177	GO:0016875	ligase activity, forming carbon-oxygen bonds	21	0	1.34	0	1
178	GO:0016877	ligase activity, forming carbon-sulfur bonds	12	0	0.77	0	1
179	GO:0016878	acid-thiol ligase activity	8	0	0.51	0	1
180	GO:0016887	ATPase activity	71	0	4.54	0	1
181	GO:0016893	endonuclease activity, active with either ribo- or deoxyribonucleic acids and producing 5'-phosphomonoesters	5	0	0.32	0	1
182	GO:0017016	Ras GTPase binding	9	0	0.58	0	1
183	GO:0017069	snRNA binding	5	0	0.32	0	1
184	GO:0017171	serine hydrolase activity	5	0	0.32	0	1
185	GO:0019208	phosphatase regulator activity	6	0	0.38	0	1
186	GO:0019783	ubiquitin-like protein-specific protease activity	10	0	0.64	0	1
187	GO:0019787	ubiquitin-like protein transferase activity	15	0	0.96	0	1
188	GO:0019829	ATPase-coupled cation transmembrane transporter activity	10	0	0.64	0	1
189	GO:0019843	rRNA binding	5	0	0.32	0	1
190	GO:0019888	protein phosphatase regulator activity	6	0	0.38	0	1
191	GO:0019899	enzyme binding	19	0	1.22	0	1
192	GO:0019904	protein domain specific binding	5	0	0.32	0	1
193	GO:0022804	active transmembrane transporter activity	26	0	1.66	0	1
194	GO:0022853	active ion transmembrane transporter activity	17	0	1.09	0	1
195	GO:0030276	clathrin binding	5	0	0.32	0	1
196	GO:0030674	protein-macromolecule adaptor activity	10	0	0.64	0	1
197	GO:0030695	GTPase regulator activity	6	0	0.38	0	1
198	GO:0031072	heat shock protein binding	9	0	0.58	0	1
199	GO:0031267	small GTPase binding	10	0	0.64	0	1
200	GO:0033218	amide binding	11	0	0.7	0	1
201	GO:0034061	DNA polymerase activity	7	0	0.45	0	1
202	GO:0034062	5'-3' RNA polymerase activity	23	0	1.47	0	1
203	GO:0036459	thiol-dependent ubiquitinyl hydrolase activity	10	0	0.64	0	1
204	GO:0042277	peptide binding	8	0	0.51	0	1
205	GO:0042393	histone binding	13	0	0.83	0	1
206	GO:0042625	ATPase-coupled ion transmembrane transporter activity	12	0	0.77	0	1
207	GO:0042626	ATPase-coupled transmembrane transporter activity	18	0	1.15	0	1
208	GO:0043021	ribonucleoprotein complex binding	8	0	0.51	0	1
209	GO:0043022	ribosome binding	6	0	0.38	0	1
210	GO:0043565	sequence-specific DNA binding	17	0	1.09	0	1
211	GO:0044769	ATPase activity, coupled to transmembrane movement of ions, rotational mechanism	9	0	0.58	0	1
212	GO:0044877	protein-containing complex binding	18	0	1.15	0	1
213	GO:0046873	metal ion transmembrane transporter activity	8	0	0.51	0	1
214	GO:0046915	transition metal ion transmembrane transporter activity	5	0	0.32	0	1
215	GO:0046961	proton-transporting ATPase activity, rotational mechanism	9	0	0.58	0	1
216	GO:0046982	protein heterodimerization activity	6	0	0.38	0	1
217	GO:0051020	GTPase binding	13	0	0.83	0	1
218	GO:0051087	chaperone binding	6	0	0.38	0	1
219	GO:0051536	iron-sulfur cluster binding	6	0	0.38	0	1
220	GO:0051540	metal cluster binding	6	0	0.38	0	1
221	GO:0052689	carboxylic ester hydrolase activity	9	0	0.58	0	1
222	GO:0060090	molecular adaptor activity	10	0	0.64	0	1
223	GO:0060589	nucleoside-triphosphatase regulator activity	12	0	0.77	0	1
224	GO:0060590	ATPase regulator activity	6	0	0.38	0	1
225	GO:0097747	RNA polymerase activity	23	0	1.47	0	1
226	GO:0101005	ubiquitinyl hydrolase activity	10	0	0.64	0	1
227	GO:0140097	catalytic activity, acting on DNA	32	0	2.05	0	1
228	GO:0140098	catalytic activity, acting on RNA	79	0	5.05	0	1
229	GO:0140101	catalytic activity, acting on a tRNA	29	0	1.85	0	1
230	GO:0140110	transcription regulator activity	19	0	1.22	0	1
231	GO:1901505	carbohydrate derivative transmembrane transporter activity	5	0	0.32	0	1
232	GO:1901681	sulfur compound binding	8	0	0.51	0	1
233	GO:1990837	sequence-specific double-stranded DNA binding	7	0	0.45	0	1
